# Supplementary material for: New machine learning models on reevaluation of the Ti-in-zircon thermometer via multivariate trace elements
Source: Royal Society of Chemistry journal article supplement (doi:10.1039/d4ja00352g), 2024-11-20
Supplement: d4ja00352g1.zip [file TableS1.earthData_997.xlsx]

## Sheet: earthData
entry_id	la_ppm	ce_ppm	pr_ppm	nd_ppm	sm_ppm	eu_ppm	gd_ppm	tb_ppm	dy_ppm	ho_ppm	er_ppm	tm_ppm	yb_ppm	lu_ppm	pb_ppm	th_ppm	u_ppm	y_ppm	hf_ppm	nb_ppm	ta_ppm	ti_ppm	α(SiO2)	α(TiO2)	REE	LREE	MREE	HREE	HREE/LREE	Nb/Ta	Th/U	T(℃)
1	3.16	21.73	2.652	29.5	68.5	1.351	268.36	78.68	763.82	195.64	698.02	121.23	956.3	163.92	120	362.9	156.088	6385.99	10762	36.32	18.16	143.33	1	1	3372.86	57.042	1180.71	2135.11	37.4305	2	2.32497	1077.34
2	0.2354	19.07	0.1473	1.456	3.03	0.0571	21.15	8.86	129.94	52.14	272.91	66.3	670.45	136.2	74	466.63	376.102	1227.89	12361.4	63.92	72.03	3.08	1	1	1381.95	20.9087	163.037	1198	57.2967	0.887408	1.2407	646.109
3	0.06	14.9	0.18	2.08	5.58	4.67	23.25	84.15	798.49	215.29	904.81	188.55	1605.2	260.3	74	1986.01	376.102	5917.86	9535.39	279.34	49.05	145.36	1	1	4107.51	17.22	916.14	3174.15	184.329	5.69501	5.28051	1079.66
4	0.791	17.6	0.308	3.12	5.06	0.183	32.22	10.85	144.09	52.56	240.9	49.41	440.66	83.92	10	193.49	46.0023	1492.32	8903.16	20.31	11.57	10.52	1	1	1081.67	21.819	192.403	867.45	39.7566	1.7554	4.2061	750.676
5	2.617	29.17	1.128	6.12	6.58	0.1103	42.48	18.54	274.33	107.97	537.16	117.36	1087.4	204.64	41	1030.29	238.47	3258.02	13167.4	178.96	80.5	6.56	1	1	2435.61	39.035	342.04	2054.53	52.633	2.22311	4.32042	707.774
6	2.424	128.5	9.49	80.91	82.95	33.83	150.4	28.1	197.46	42.33	146.14	27.97	249.79	48.8	53	242.96	563.153	1353.81	9287.92	3.11	1.531	34.3	1	1	1229.09	221.324	492.74	515.03	2.32704	2.03135	0.431428	876.506
7	0.57	17.03	0.501	5.98	10.18	0.675	50.58	15.35	182.21	62.91	272.06	53.42	464.97	88.85	64	244.15	677.697	1783.19	7708.43	15.21	5.45	8.93	1	1	1225.29	24.081	258.995	942.21	39.1267	2.79083	0.360264	735.372
8	0.0462	34.86	0.283	4.8	8.55	0.344	44.12	14.13	176.3	60.63	267.15	52.56	454.24	83.89	130	666.01	1452.52	1698.27	7956.37	28.41	8.1	7.83	1	1	1201.9	39.9892	243.444	918.47	22.968	3.50741	0.45852	723.422
9	0.0326	5.04	0.41	6.29	10.03	1.464	47.35	13.3	149.29	48.99	204.93	38.95	338.09	66.31	65	75.61	684.261	1348.49	6734.04	2.83	0.855	23.44	1	1	930.477	11.7726	221.434	697.27	59.2282	3.30994	0.110499	832.725
10	1.572	16.21	0.668	4.97	6.51	0.158	42.29	16.88	235.47	89.38	430.3	93.58	865.39	167.3	130	624.91	1313.48	2583.34	15486.9	53.54	41.25	58.78	1	1	1970.68	23.42	301.308	1645.95	70.2797	1.29794	0.475766	944.727
11	5.08	18.09	1.32	10.5	13.06	1.155	58.02	16.86	196.14	65.91	292.81	61.24	564.76	111.43	59	194.58	658.045	1819.92	8128.02	20.39	13.85	8.81	1	1	1416.38	34.99	285.235	1096.15	31.3275	1.4722	0.295694	734.129
12	690.51	14.9	178.99	2.08	155.77	0.967	190.76	39.08	394.65	124.37	561.53	119.76	1085.17	203.25	61	1373.06	645.653	3578.75	12129.1	141.54	60.94	9.72	1	1	3761.79	886.48	781.227	2094.08	2.36224	2.32261	2.12662	743.231
13	9.43	36.74	2.755	12.02	6.59	0.181	29.63	10.41	136.21	50.76	234.25	48.25	436.12	83.93	26	236.97	264.418	1421.27	10295.6	24.62	17.11	10.77	1	1	1097.28	60.945	183.021	853.31	14.0013	1.43892	0.896195	752.908
14	0.77	38.77	2.083	21.51	29.65	9.28	101.94	26.53	282.01	88.75	364.64	68.03	574.42	109.82	34	379.69	344.268	2557.87	5798.8	2.89	0.578	24.45	1	1	1718.2	63.133	449.41	1205.66	19.0971	5	1.10289	837.412
15	0.2162	10.53	0.2234	3.43	6.63	0.526	35.86	10.78	134.56	49.39	227.82	46.05	411.28	85.31	39	119.92	412.122	1449.23	7237.6	2.548	0.922	12.79	1	1	1022.61	14.3996	188.356	819.85	56.9356	2.76356	0.290982	769.542
16	0.0099	7.17	0.0958	1.788	3.41	0.342	17.77	5.55	67.41	23.43	105.22	21.64	196.17	39.12	39	50.64	404.615	655.92	6970.03	4.6	1.87	15.46	1	1	489.126	9.0637	94.482	385.58	42.5411	2.45989	0.125156	788.526
17	42.64	118.63	15.44	69.87	29.85	0.536	71.52	20.53	220.44	71.85	356.08	90.24	970.25	212.15	61	1383.64	650.326	2424.44	15255.2	77.86	90.41	28.17	1	1	2290.03	246.58	342.876	1700.57	6.89663	0.861188	2.12761	853.44
18	2.54	24.8	1.31	8.35	9.08	0.0901	53.84	21.04	291.89	112.65	540.72	112.57	995.84	188.94	58	706.02	623.42	3249.56	10519.3	45.9	19.04	3.12	1	1	2363.66	37	375.94	1950.72	52.7222	2.41071	1.13249	647.096
19	4.98	27.37	1.497	7.72	6.68	0.226	31.7	12.28	172.54	66.64	335.99	77.15	732.72	144.35	68	641.66	753.111	1740.03	9272.63	82.18	47.47	30.37	1	1	1621.84	41.567	223.426	1356.85	32.6425	1.7312	0.852012	862.139
20	76.65	213.3	21.48	96.25	43.41	0.429	106.81	28.61	300.98	93.41	395.47	83.62	767.63	149.92	30	487.69	314.787	2486.91	12732	142.49	64.87	166.28	1	1	2377.97	407.68	480.239	1490.05	3.65495	2.19655	1.54927	1102.3
21	51.82	140.13	15.93	71.48	24.61	0.442	57.66	17.17	213.6	77.59	363.2	76.28	704.87	137.91	3.8	464.28	40.8953	2271.54	9740.08	53.27	25.95	9.08	1	1	1952.69	279.36	313.482	1359.85	4.86773	2.05279	11.3529	736.907
22	0.461	16.72	0.237	2.43	4.29	0.16	25.81	9.3	123.79	46.35	218.59	46.01	412.03	79.9	5	332.38	51.9172	1337.9	9628.9	49.87	20.82	6.49	1	1	986.078	19.848	163.35	802.88	40.4514	2.39529	6.40211	706.841
23	9.93	56.13	3.69	18.42	16.26	1.024	52	16.04	181.91	56.95	248.96	48.89	431.16	80.24	130	1517.95	1354.42	1603.51	9986.61	99.73	14.46	36.76	1	1	1221.6	88.17	267.234	866.2	9.8242	6.89696	1.12073	884.847
24	381.98	14.9	142.01	2.08	140.66	1.941	149.07	24.03	194.91	53.02	207.62	38.69	323.27	60.2	6.7	197.88	62.0674	1448.4	8872.01	24.03	7.81	7.98	1	1	1734.38	540.97	510.611	682.8	1.26218	3.07682	3.18815	725.129
25	8.28	24.99	1.983	11.62	10.54	0.815	41.68	12.17	139.91	45.8	193.9	38.07	325.76	62.31	110	886.2	1107	1279.07	7694.98	58.06	3.43	36.84	1	1	917.828	46.873	205.115	665.84	14.2052	16.9271	0.800546	885.111
26	97.27	215.17	22.12	72.57	15.96	0.288	21.17	6.26	80.55	32.01	185.41	51.34	579.63	124.64	15	649.04	153.749	671.45	14860.8	88.03	83.04	23.01	1	1	1504.39	407.13	124.228	973.03	2.38997	1.06009	4.22141	830.681
27	3.17	18.44	1.059	8.74	12.44	0.991	58.3	16.82	194.7	64.02	265.94	52.15	444.14	84.6	19	189.06	207.888	1772.04	7717.36	10.47	3.13	6.82	1	1	1225.51	31.409	283.251	910.85	28.9996	3.34505	0.909433	711.168
28	1.063	17.35	0.348	2.48	3.8	0.0634	27.85	11.79	172.25	68.4	343.81	77.09	739.37	143.44	6.2	424.64	65.6796	2032.62	12097.1	102.34	53.37	7.18	1	1	1609.1	21.241	215.753	1372.11	64.5972	1.91756	6.46532	715.697
29	38.01	145.18	21.3	97.34	31.23	0.124	52.23	15.58	196.65	72.68	355.29	77.07	705.75	133.73	22	593.95	234.407	2095.62	11896.7	108.73	45.71	15.29	1	1	1942.16	301.83	295.814	1344.52	4.45456	2.37869	2.53384	787.4
30	4.93	23.93	1.551	7.83	7.9	0.334	41.71	14.81	194.25	70.53	325.21	66.86	589.02	111.92	19	795.31	170.11	2009.69	10487.3	65.83	17.64	8.8	1	1	1460.79	38.241	259.004	1163.54	30.4265	3.73186	4.67528	734.025
31	0.828	19.21	0.352	2.44	5.58	0.122	38.93	16.32	235.49	91.85	451.35	98.88	894.4	166.66	120	791.77	1291.34	2722.98	11000.2	110.19	43.08	3.13	1	1	2022.41	22.83	296.442	1703.14	74.601	2.5578	0.613138	647.341
32	35.67	113.49	10.57	43.81	13.81	0.1004	55.45	20.64	293.86	111.9	534.18	111.9	1001.85	187.11	56	1061.21	644.959	3362.48	11035.1	144.69	53.67	6.89	1	1	2534.34	203.54	383.86	1946.94	9.56539	2.69592	1.64539	712.064
33	0.0068	7.58	0.1033	1.672	3.76	0.348	19.08	6.14	74.87	26.13	117.8	23.44	209.75	40.89	16	49.97	172.291	748.27	7986.33	5.13	1.895	9.11	1	1	531.57	9.3621	104.198	418.01	44.6492	2.70712	0.290032	737.211
34	0.696	19.48	0.276	2.89	5.97	0.164	37.02	13.31	178.4	64.97	297.84	60.62	531.46	99.75	19	252.89	225.637	1875.88	8923.9	18.2	7.46	18.01	1	1	1312.85	23.342	234.864	1054.64	45.1821	2.43968	1.12078	804.323
35	0.34	59.4	0.13	1.36	1.7	0.41	9.56	3.48	48	20.9	111	28.1	296	64.9	4.64	155	154	714	6878	4.49	1.22	7.89	1	1	645.28	61.23	63.15	520.9	8.50727	3.68033	1.00649	724.108
36	3.8	78.3	0.49	2.5	1.86	0.44	9.56	3.4	46.2	21.4	121	32.1	372	84.3	9.94	421	298	779	7799	7.31	1.41	6.51	1	1	777.35	85.09	61.46	630.8	7.41333	5.1844	1.41275	707.108
37	0.05	57	0.06	1.39	2.79	0.57	14.9	5.4	66.1	26.3	121	26.3	251	48	3.06	95.9	103	796	6304	4.38	1.27	7.86	1	1	620.86	58.5	89.76	472.6	8.07863	3.44882	0.931068	723.765
38	0.01	66.9	0.11	1.91	4.16	0.79	22.7	7.39	88.8	32.8	144	30	273	50.3	3.31	113	106	974	5631	5.17	1.49	9.4	1	1	722.87	68.93	123.84	530.1	7.69041	3.4698	1.06604	740.113
39	0.02	66.3	0.11	1.84	4.43	0.76	21.4	7.46	87.8	32.9	145	30.1	273	50.4	3.3	114	107	965	5707	5	1.53	8.53	1	1	721.52	68.27	121.85	531.4	7.7838	3.26797	1.06542	731.173
40	0.01	61	0.05	1.48	2.96	0.56	14.7	5.31	65.1	26.4	127	28.4	273	55	4.08	150	136	834	6532	4.58	1.4	8.32	1	1	660.97	62.54	88.63	509.8	8.15158	3.27143	1.10294	728.904
41	0.01	52.6	0.06	0.88	1.28	0.36	7.44	2.66	36.1	17.2	97.6	25.5	288	63.8	4.73	150	153	624	7108	4.88	1.16	5.62	1	1	593.49	53.55	47.84	492.1	9.18954	4.2069	0.980392	694.495
42	9.78	76.4	1.67	6.36	2.64	0.46	9.53	3.61	47.6	21.3	114	28.6	306	65.7	5.26	182	167	744	6766	4.99	1.19	6.29	1	1	693.65	94.21	63.84	535.6	5.68517	4.19328	1.08982	704.129
43	0.01	69.7	0.14	2.29	4.16	0.77	22.2	7.5	88.1	33	147	30.6	278	51.9	2.97	96.8	99.5	981	5854	5.87	1.6	9.34	1	1	735.37	72.14	122.73	540.5	7.49238	3.66875	0.972864	739.519
44	0.01	62.6	0.07	1.33	2.91	0.5	16	5.78	71.9	28.5	134	29.3	271	53.9	3.2	117	108	882	6269	5.32	1.43	6.69	1	1	677.8	64.01	97.09	516.7	8.07218	3.72028	1.08333	709.484
45	19.7	83.8	2.92	9.92	2.67	0.43	8.56	3.07	39.9	18	94.8	23.4	250	53.9	3.78	119	122	622	6448	3.85	1.01	6.73	1	1	611.07	116.34	54.63	440.1	3.78288	3.81188	0.97541	710.005
46	0.16	76.1	0.1	2.21	4.31	0.67	27.3	10.2	125	47.4	210	43.3	394	71.7	6.89	257	224	1395	7283	10.5	2.81	8.17	1	1	1012.45	78.57	167.48	766.4	9.75436	3.73665	1.14732	727.255
47	138.823	110.575	45.7409	39.0141	30.0412	66.8755	32.1564	21.5402	92.3195	34.8951	166.194	33.4892	406.006	51.6013	419.82	97.0779	91.1368	2230.13	9945.63	168.929	115.862	100.147	1	1	1269.27	334.153	242.933	692.186	2.07146	1.45802	1.06519	1020.67
48	0.06	311.821	336.621	125.755	85.9143	0.91	65.3188	45.4796	151.559	60.137	253.324	62.6763	721.945	102.454	16.06	322.242	429.899	3167.21	10149	471.962	272.355	145.239	1	1	2323.97	774.256	349.181	1200.54	1.55057	1.73289	0.749576	1079.53
49	0.06	64.9874	45.8657	18.1181	12.6138	17.7415	16.2717	11.3849	62.9931	23.9361	137.599	26.7829	384.358	45.8749	16.06	207.965	501.707	1829.2	11725.3	117.018	162.475	15.5329	1	1	868.587	129.031	121.005	618.551	4.79381	0.720223	0.414515	789.007
50	0.06	14.9	188.245	97.5489	47.9132	224.343	33.9526	24.1579	65.7882	30.1834	112.151	34.529	305.38	56.8007	16.06	256.432	426.386	1237.16	10499.8	308.24	366.311	55.1687	1	1	1235.95	300.754	396.155	539.044	1.79231	0.841471	0.601408	936.279
51	70.8951	29.9334	12.9833	10.9077	17.1678	14.8571	22.066	17.6454	84.3644	34.0698	176.811	37.5099	472.493	60.654	189.417	46.6846	168.122	2109.94	12398.9	47.7359	56.2434	25.7255	1	1	1062.36	124.719	156.101	781.538	6.26637	0.848739	0.277683	843.114
52	262.84	62.3452	72.9281	30.504	17.5651	82.9367	15.6225	9.09993	53.8295	15.6345	91.2827	15.0337	250.076	25.5857	200.589	108.553	218.495	1339.68	13329	67.0432	76.2104	24.746	1	1	1005.28	428.617	179.054	397.613	0.927664	0.879712	0.496824	838.756
53	22.9728	62.1768	4.90049	4.85199	4.86034	10.2097	11.4334	4.97704	62.8445	16.9786	135.178	17.7689	398.902	35.5588	55.2078	66.207	81.1858	2105.5	10821.3	30.9544	20.3165	8.55956	1	1	793.613	94.902	94.3251	604.386	6.36853	1.52361	0.8155	731.489
54	31.3523	1.8328	3.61009	3.39009	5.06548	7.45326	9.95426	8.83691	51.3251	13.6972	56.05	6.60256	68.8626	5.36703	177.638	18.3579	355.196	1119.59	14257.9	26.9873	43.479	10.6051	1	1	273.4	40.1853	82.635	150.579	3.74713	0.620697	0.0516839	751.441
55	992.527	14.9	368.724	252.43	194.394	315.2	194.946	192.229	462.176	281.956	768.792	292.722	1538.62	387.279	16.06	738.963	371.778	5544.26	8750.97	1.82	1.22	132.423	1	1	6256.9	1628.58	1358.94	3269.37	2.0075	1.4918	1.98764	1064.41
56	419.335	49.6158	29.0817	16.1808	16.7716	75.7699	18.9529	11.4004	48.9267	16.5957	79.76	15.6101	201.749	24.9838	109.197	56.181	97.8124	1062.69	10918.5	82.4892	64.4881	62.8326	1	1	1024.73	514.213	171.822	338.699	0.658674	1.27914	0.574376	953.738
57	0.06	267.978	231.407	73.7402	34.5786	110.843	35.1051	22.411	109.548	39.6864	209.137	39.7636	537.816	64.4059	168.97	102.681	63.453	2729.9	8691.03	86.9891	52.1023	86.2529	1	1	1776.48	573.185	312.486	890.809	1.55414	1.66958	1.61823	998.447
58	0.06	14.9	0.18	2.08	5.58	0.91	256.449	171.163	333.727	164.689	452.487	178.665	1040.68	269.461	16.06	813.565	664.82	3447.64	8988.55	1.82	1.22	230.727	1	1	2891.03	17.22	767.829	2105.98	122.299	1.4918	1.22374	1160.73
59	809.398	87.4981	153.203	60.1838	45.3227	141.476	43.5475	36.8477	155.071	66.3095	306.314	72.104	809.123	115.79	384.782	210.116	358.881	3604.78	12536.7	255.838	305.318	144.445	1	1	2902.19	1110.28	422.266	1369.64	1.2336	0.83794	0.585476	1078.62
60	0.06	14.9	0.18	308.529	122.863	0.91	52.1737	28.8103	52.2474	23.545	63.9072	22.9551	156.501	39.1997	481.489	333.329	116.271	664.021	5552.18	180.309	126.739	72.4349	1	1	886.781	323.669	257.005	306.108	0.945746	1.42268	2.86683	973.413
61	0.06	45.2608	111.326	32.3903	8.77737	14.3991	12.9001	6.25619	57.6194	16.7163	115.199	15.3711	295.54	26.597	35.5554	36.0708	83.544	1758.42	10251.4	32.4276	24.5486	2.94536	1	1	758.412	189.037	99.9521	469.423	2.48323	1.32095	0.431758	642.705
62	251.882	399.631	131.056	92.5505	59.9384	122.637	49.6503	33.0672	105.252	44.571	176.69	43.8698	419.337	65.7725	280.205	211.847	131.834	2102.28	10218.2	86.8477	78.6683	52.8398	1	1	1995.9	875.12	370.545	750.24	0.8573	1.10397	1.60692	930.599
63	0.06	99.6705	46.3644	13.7222	5.21991	9.31255	6.43404	4.19239	26.351	9.15447	57.9385	10.6183	180.059	20.8579	78.5533	68.015	115.07	831.994	11153.4	28.4615	29.4436	36.469	1	1	489.956	159.817	51.5099	278.629	1.74342	0.966645	0.591078	883.884
64	0.06	146.752	361.336	183.164	133.706	288.741	109.47	90.6282	235.574	116.69	354.183	107.615	693.645	131.869	495.547	330.884	298.193	3324.97	10405.5	208.978	211.331	118.027	1	1	2953.43	691.312	858.12	1404	2.03092	0.988863	1.10963	1046.04
65	474.524	179.159	188.716	135.235	72.4317	79.6444	52.1432	31.8459	103.751	38.8602	151.259	32.7588	333.361	49.1861	67.6774	54.0525	30.6699	1826.71	6700.29	416.512	249.837	52.3265	1	1	1922.88	977.635	339.817	605.425	0.619275	1.66713	1.76239	929.321
66	96.9489	260.267	115.512	79.2768	82.85	114.902	74.1163	61.171	125.682	71.2498	173.756	69.5078	332.598	92.2245	178.991	112.408	96.1859	1126.69	7472.32	442.818	249.375	195.37	1	1	1750.06	552.005	458.721	739.336	1.33936	1.77571	1.16866	1130.45
67	159.061	68.8633	21.4257	13.2191	14.3046	32.2098	16.1371	10.4539	47.0023	16.5751	81.2123	15.3356	192.622	22.9964	85.8568	78.3488	138.165	1122.56	9841.76	97.4999	70.2147	11.4029	1	1	711.418	262.569	120.108	328.741	1.25202	1.3886	0.567066	758.374
68	0.06	323.286	0.18	241.057	121.745	68.1861	91.7295	63.6269	192.186	78.6859	281.784	66.6535	571.066	85.0216	343.595	380.372	225.314	3299.22	9302.08	1.82	1.22	78.584	1	1	2185.27	564.583	537.473	1083.21	1.9186	1.4918	1.68818	984.972
69	0.06	14.9	0.18	2.08	5.58	0.91	391.84	9.15	456.752	206.188	458.184	168.793	796.03	201.223	16.06	630.932	896.766	3602.72	8922.72	1.82	1.22	342.881	1	1	2711.87	17.22	864.231	1830.42	106.296	1.4918	0.703564	1238.4
70	222.099	7.2371	48.0031	18.9591	8.93204	28.0793	11.7833	4.51336	33.554	5.96159	34.7024	4.13765	84.2562	6.68446	22.8327	14.1247	235.744	736.358	13234.8	8.33975	6.76765	39.6188	1	1	518.903	296.299	86.8621	135.742	0.458127	1.2323	0.0599155	894.003
71	0.06	156.19	153.958	78.5194	39.6992	62.5973	31.5146	17.28	79.9326	23.7666	116.082	19.2065	254.586	26.5845	59.1435	96.1823	80.4027	1750.77	9391.05	50.9861	44.827	53.9234	1	1	1059.98	388.727	231.024	440.225	1.13248	1.1374	1.19626	933.266
72	0.06	473.713	0.18	351.434	38.0455	48.9608	20.9395	5.28034	47.83	8.6129	54.9584	5.96309	124.941	9.75667	30.315	87.0909	197.049	1095.41	6096.83	16.4756	11.5877	6.0697	1	1	1190.67	825.386	161.056	204.232	0.247438	1.42183	0.441975	701.059
73	50.1783	18.7336	24.5891	18.2752	11.3651	20.4898	10.8255	3.20372	19.9152	3.3114	16.4718	1.73903	31.6179	2.06522	21.8777	64.1023	52.5172	353.429	11667.4	19.4784	18.5931	29.0865	1	1	232.781	111.776	65.7993	55.2054	0.493892	1.04762	1.22059	857.127
74	286.275	17.3368	39.1602	22.5913	30.6309	104.226	39.869	29.2007	134.834	55.6594	277.608	59.2647	690.59	93.2976	70.0913	68.0046	298.188	3432.6	12985.6	159.906	294.838	77.6613	1	1	1880.54	365.363	338.761	1176.42	3.21987	0.542352	0.228059	983.283
75	0.06	14.9	0.18	399.219	164.526	0.91	65.9958	38.596	54.5157	26.1728	54.7742	22.4654	97.2033	28.7589	16.06	1173.81	187.276	389.271	6349.4	317.147	191.039	168.949	1	1	968.277	414.359	324.544	229.375	0.553565	1.66012	6.2678	1105.03
76	881.309	99.1225	114.028	71.813	59.7128	122.882	44.3186	26.9068	51.9418	21.3811	54.384	16.0071	95.6724	18.5465	136.22	143.22	171.735	574.453	9072.53	98.4724	54.5898	245.059	1	1	1678.03	1166.27	305.762	205.991	0.176623	1.80386	0.833963	1172.03
77	18.0671	25.3814	8.21199	7.55348	8.40661	9.72789	16.732	9.68036	90.0454	27.1193	192.369	26.5907	498.194	47.0076	26.6542	59.5185	81.7838	2874.14	10420.6	23.5498	37.9796	8.98295	1	1	985.088	59.214	134.592	791.282	13.3631	0.620065	0.727754	735.916
78	0.06	14.9	237.605	165.067	79.2724	312.855	49.9327	17.4501	83.2696	19.9137	103.256	14.881	246.674	25.4362	144.522	360.631	105.037	1891.52	8467.61	57.7108	15.6294	9.25928	1	1	1370.57	417.631	542.78	410.161	0.982113	3.69244	3.43337	738.714
79	38.2721	35.9134	5.87775	5.06756	5.6422	29.5828	9.05781	4.45755	31.1245	7.77905	46.0225	6.4826	117.471	10.5057	15.6856	34.7876	71.304	794.234	10387.2	16.3375	12.1965	22.0759	1	1	353.256	85.1308	79.8649	188.26	2.21143	1.33952	0.487878	826.132
80	164.707	135.252	44.4154	31.3351	23.0235	102.998	24.1947	17.3827	68.4543	29.523	136.831	34.9261	409.065	65.7728	68.4765	102.275	86.4064	1674.43	9166.89	83.4929	74.9423	46.191	1	1	1287.88	375.71	236.053	676.118	1.79958	1.1141	1.18365	913.227
81	0.06	44.451	77.1336	26.4618	11.0688	23.0002	18.9835	9.70842	100.643	29.5372	217.187	29.6595	600.886	55.5362	31.1545	89.5792	125.811	3231.48	9310.92	43.2084	29.5985	5.57081	1	1	1244.32	148.106	163.403	932.806	6.29822	1.45982	0.712013	693.751
82	399.138	14.9	53.3883	26.5101	20.0474	105.762	19.1194	14.6115	45.9909	22.3611	96.1952	28.2023	284.082	51.7781	296.252	426.499	400.944	999.27	11950.1	244.318	328.981	68.6392	1	1	1182.09	493.936	205.531	482.619	0.977089	0.74265	1.06374	965.893
83	0.06	14.9	0.18	261.703	161.956	0.91	97.2886	56.1439	150.977	51.6222	195.87	47.4135	503.157	82.1529	16.06	1002.73	494.431	2715.17	9640.88	234.179	70.3974	71.0331	1	1	1624.33	276.843	467.276	880.216	3.17948	3.32652	2.02805	970.672
84	0.06	14.9	0.18	2.08	5.58	0.91	214.765	180.124	320.228	184.728	430.395	200.006	881.118	285.116	16.06	1231.77	1098.59	2386.5	7212.39	1.82	1.22	319.477	1	1	2720.19	17.22	721.607	1981.36	115.062	1.4918	1.12123	1223.93
85	0.06	48.5444	134.156	47.5878	20.8294	70.6978	26.986	11.0074	124.848	30.353	233.561	29.5626	676.435	58.4442	30.3942	109.456	266.431	3716.3	11731.6	62.3385	49.5046	21.5629	1	1	1513.07	230.348	254.369	1028.36	4.46435	1.25925	0.410822	823.568
86	0.06	364.419	118.523	102.773	65.157	314.495	52.1738	32.2073	75.6243	29.9868	100.931	27.0085	233.034	40.8703	99.6991	160.814	153.419	1214.38	9941.09	150.138	90.0753	162.603	1	1	1557.26	585.775	539.658	431.831	0.737197	1.6668	1.0482	1098.48
87	509.228	49.5062	131.532	65.1788	60.5662	203.481	66.7409	63.6586	235.158	112.312	466.777	126.744	1199.58	192.261	130.783	126.766	488.743	4970.91	11213.6	170.575	202.765	57.3899	1	1	3482.73	755.445	629.604	2097.68	2.77674	0.841246	0.259371	941.524
88	0.06	365.7	262.947	114.888	81.8053	361.557	68.0823	47.5329	156.648	62.5202	262.754	65.2031	670.574	99.8627	132.072	247.696	331.948	3053.24	11347.3	1.82	1.22	132.756	1	1	2620.13	743.595	715.626	1160.91	1.56122	1.4918	0.746191	1064.81
89	485.775	14.9	256.301	164.397	127.829	0.91	98.5758	72.1659	156.898	84.6129	239.24	87.51	525.037	129.793	437.193	716.02	304.691	1904.01	9461.52	192.708	217.872	139.05	1	1	2443.94	921.373	456.379	1066.19	1.15718	0.8845	2.34999	1072.36
90	0.06	455.735	0.18	297.095	30.163	52.3167	12.5705	8.19173	23.0227	10.4225	38.49	10.883	94.349	16.4551	44.9755	80.2312	55.4573	436.789	2865.71	55.4722	58.007	16.9924	1	1	1049.93	753.07	126.265	170.6	0.226539	0.956301	1.44672	798.25
91	622.209	263.64	53.2297	37.8168	35.0151	146.578	37.2576	32.9238	87.7892	51.3632	172.67	64.5761	462.527	116.029	140.863	225.915	292.803	1478.45	8908.39	208.671	146.486	38.0988	1	1	2183.62	976.896	339.564	867.165	0.887674	1.42452	0.77156	889.203
92	0.06	270.319	98.313	33.9154	19.592	52.5018	19.9141	16.415	55.7079	29.2395	127.141	39.4742	406.258	76.7712	99.7596	211.415	198.056	1338.17	9127.78	145.446	123.507	21.5849	1	1	1245.62	402.608	164.131	678.884	1.68622	1.17763	1.06745	823.679
93	0.06	180.443	413.914	130.053	41.0722	106.662	25.0614	19.4033	52.5329	25.3678	87.2264	26.7785	210.415	41.2744	48.6256	99.6761	90.9939	881.713	2199.47	110.171	64.0001	9.48551	1	1	1360.26	724.47	244.732	391.062	0.539791	1.72142	1.09541	740.955
94	585.008	180.756	36.1386	15.8653	17.6832	90.8613	24.6351	13.7792	99.2009	30.006	201.695	33.538	643.197	69.609	67.5819	285.036	242.722	3004.33	9606.29	123.067	54.5041	37.6256	1	1	2041.97	817.768	246.16	978.044	1.19599	2.25794	1.17433	887.677
95	0.06	14.9	287.678	180.549	144.075	373.272	131.19	120.047	234.197	161.174	375.107	191.698	751.556	284.426	411.277	866.816	509.198	1579.12	5868.05	471.101	1.22	190.314	1	1	3249.93	483.187	1002.78	1763.96	3.65068	386.148	1.70231	1125.79
96	0.06	261.182	0.18	190.353	27.7171	55.8498	15.8619	11.195	31.4547	15.0859	53.3012	15.5374	124.263	23.382	25.0433	58.5502	47.8462	547.357	2435.99	28.7664	28.2778	14.2554	1	1	825.424	451.775	142.079	231.57	0.512578	1.01728	1.22372	780.32
97	38.6392	140.243	22.6853	22.9089	20.7156	65.7861	25.932	18.095	97.4101	38.0709	208.323	42.7144	612.591	78.3918	61.7617	256.782	183.993	2761.6	9019.17	86.186	47.7581	16.8721	1	1	1432.51	224.477	227.939	980.091	4.36611	1.80464	1.39561	797.513
98	189.941	8.9945	8.69347	8.68866	11.627	11.302	22.6852	15.1763	131.496	43.5096	304.82	47.2216	861.341	86.2201	23.9777	69.1674	248.509	4228.07	11824	50.9284	53.8115	6.41881	1	1	1751.72	216.318	192.287	1343.11	6.20897	0.946423	0.278329	705.884
99	157.207	135.192	16.0085	9.05392	9.68464	52.3046	11.7914	6.82328	37.8761	13.0786	76.9559	14.2728	239.586	29.5172	41.5617	151.851	124.377	1085.24	9764.93	67.3547	42.5972	13.0801	1	1	809.352	317.461	118.48	373.411	1.17624	1.5812	1.22089	771.753
100	0.06	27.6175	23.7727	6.52949	3.0176	9.28407	5.30953	2.38309	28.0793	7.85015	64.7557	9.21026	220.696	22.0135	5.28169	33.534	43.7052	1011.9	9812.92	8.7722	8.09965	5.08634	1	1	430.579	57.9797	48.0736	324.525	5.59722	1.08303	0.767277	686.119
101	0.06	134.884	232.298	48.2885	6.53968	16.2517	5.37486	2.64451	21.0514	6.25077	45.8206	7.16328	148.353	16.0434	23.797	117.481	102.729	685.382	8649.4	21.1556	16.1925	7.13257	1	1	691.023	415.53	51.8621	223.631	0.538182	1.30651	1.1436	715.111
102	493.08	122	48.111	27.2615	25.6979	106.995	31.0806	21.9889	105.85	42.4281	216.482	43.7174	558.241	71.7665	52.3491	167.471	153.776	2860.49	8224.11	108.305	58.2013	35.7293	1	1	1914.7	690.452	291.613	932.634	1.35076	1.86087	1.08906	881.408
103	0.06	14.9	0.18	2.08	5.58	0.91	324.958	9.15	300.894	139.401	285.553	114.218	496.5	137.149	225.608	602.632	608.017	1937.06	3698.09	1.82	1.22	90.5183	1	1	1831.53	17.22	641.492	1172.82	68.108	1.4918	0.991142	1005.55
104	65.7827	52.7432	8.43894	4.42742	4.02445	14.4757	7.19063	3.42236	37.799	11.5431	98.8716	15.6379	399.772	44.4898	23.1448	133.096	243.16	1516.71	12681.5	21.2846	14.504	7.9794	1	1	768.619	131.392	66.9121	570.314	4.34055	1.4675	0.547359	725.122
105	0.06	345.953	0.18	144.817	38.4935	127.643	26.7832	21.6323	56.111	30.3384	101.943	37.4855	282.182	64.8378	118.465	294.781	267.57	902.973	4816.43	284.799	262.136	227.559	1	1	1278.46	491.01	270.663	516.787	1.0525	1.08646	1.1017	1158.17
106	0.06	175.291	469.667	98.6295	17.8739	42.6285	16.4781	9.41926	59.4251	20.6193	131.151	23.8623	416	49.0142	18.3626	80.1483	60.6101	1821.09	6756.37	16.0207	12.308	9.10519	1	1	1530.12	743.648	145.825	640.647	0.861492	1.30165	1.32236	737.162
107	176.852	221.083	30.2614	22.9921	19.2905	72.6314	24.6893	15.5372	94.2656	33.121	204.251	37.3693	604.852	67.1275	31.2755	134.234	115.294	2895.37	8528.59	102.344	56.2298	48.7595	1	1	1624.32	451.188	226.414	946.721	2.09829	1.8201	1.16427	920.157
108	0.06	14.9	0.18	265.099	49.5764	122.238	27.3937	20.3408	41.7386	23.9603	65.518	27.766	154.081	43.5054	143.915	479.764	187.269	467.06	2973.81	173.574	154.02	31.6669	1	1	856.357	280.239	261.287	314.83	1.12343	1.12696	2.56189	867.036
109	0.06	14.9	62.4748	30.6091	23.3382	79.6895	25.0925	18.0202	78.7651	32.7304	165.395	37.5373	481.796	67.4832	135.615	498.557	389.315	2100.05	10846.4	285.072	213.292	22.7958	1	1	1117.89	108.044	224.905	784.942	7.26504	1.33653	1.2806	829.651
110	84.7227	106.432	43.153	28.7345	21.9395	76.9393	29.9572	13.9183	109.015	29.885	197.087	27.9207	529.005	50.2779	48.9157	287.009	237.301	3139.82	9853.77	34.4867	24.1056	13.1184	1	1	1348.99	263.043	251.769	834.176	3.17126	1.43065	1.20947	772.041
111	0.06	14.9	0.18	293.223	175.591	0.91	141.035	110.414	248.887	134.017	372.187	133.672	789.007	187.616	302.059	928.38	423.819	2988.15	6053.09	1.82	1.22	73.6138	1	1	2601.7	308.363	676.836	1616.5	5.24219	1.4918	2.19051	975.686
112	0.06	486.134	272.903	97.0486	49.7229	233.887	38.8314	25.0092	92.567	34.4833	158.193	35.9714	439.156	63.3485	122.403	468.049	314.305	2098.93	9828.1	171.733	114.678	65.5944	1	1	2027.31	856.146	440.017	731.152	0.854004	1.49753	1.48916	959.624
113	241.221	14.9	25.0703	20.9245	20.5831	40.3742	22.1217	18.875	72.0928	36.3003	166.653	47.2793	511.79	87.0862	221.763	689.965	678.732	1876.73	12929	1.82	1.22	14.5052	1	1	1325.27	302.116	174.047	849.109	2.81054	1.4918	1.01655	782.066
114	0.06	14.9	495.676	345.429	5.58	0.91	226.872	179.821	323.573	197.724	443.389	208.915	841.938	286.068	16.06	3455.56	1592.82	2246.53	6807.72	1.82	1.22	266.692	1	1	3570.85	856.064	736.757	1978.03	2.31061	1.4918	2.16946	1188.19
115	24.5241	14.9	64.0093	62.8018	63.6429	217.173	68.259	67.5206	182.407	126.773	414.651	185.916	1181.14	345.273	204.896	620.678	476.334	2828.22	8553.7	378.938	250.27	88.7104	1	1	3018.99	166.235	599.002	2253.75	13.5576	1.51412	1.30303	1002.57
116	181.649	14.9	223.814	143.467	127.758	282.922	108.648	92.0898	197.478	123.453	318.588	134.687	650.197	190.018	189.954	555.61	388.357	1967.89	7849.13	345.579	324.101	206.983	1	1	2789.67	563.83	808.895	1416.94	2.51307	1.06627	1.43067	1140.82
117	0.00942001	20.959	0.156892	3.63681	7.57013	1.10649	52.7889	17.3325	332.582	100.177	664.941	97.2891	1521.65	174.174	464.254	258.772	336.812	5652.09	10579.5	13.3678	4.82722	5.12324	1	1	2994.37	24.7621	411.38	2558.23	103.312	2.76926	0.768298	686.721
118	0.0121353	9.34956	0.0206973	0.62597	0.985895	0.52335	5.12328	1.43118	23.2485	6.38026	44.5658	7.51614	141.446	19.4134	136.676	81.3784	103.075	427.544	9366.08	0.482119	0.250805	20.6916	1	1	260.642	10.0084	31.3122	219.322	21.9139	1.92228	0.78951	819.099
119	0.0576914	8.63464	0.213014	2.07991	5.02662	3.25053	28.5848	8.62345	143.377	41.5508	291.369	50.2025	926.462	123.755	468.178	130.493	593.192	2715.67	11876.6	4.20106	7.18183	8.2403	1	1	1633.19	10.9853	188.863	1433.34	130.478	0.584956	0.219984	728.031
120	0.0314961	53.1638	0.0859935	1.50017	3.53311	1.46797	18.0533	5.54923	90.3761	24.5536	159.376	26.1574	452.643	53.2685	16.06	583.919	643.594	1591.45	10054.6	4.12286	1.58772	9.86411	1	1	889.76	54.7815	118.98	715.999	13.0701	2.59671	0.907279	744.608
121	0.00203243	21.1473	0.0911084	1.46147	2.32274	0.599327	10.945	3.2667	54.6807	16.1424	112.184	18.495	328.352	42.6032	177.524	109.221	202.398	1008.19	11351.5	1.98551	0.9531	6.90801	1	1	612.293	22.7019	71.8145	517.777	22.8076	2.08321	0.539636	712.293
122	0.161425	15.5474	0.109035	1.3992	2.34205	0.766578	11.8839	3.79969	68.2658	22.1829	163.405	28.7546	532.705	74.93	281.418	191.173	328.136	1430.66	11282.6	1.27633	0.598222	5.92607	1	1	926.252	17.2171	87.058	821.977	47.742	2.13354	0.582601	699.008
123	0.00166589	8.29443	0.0204613	0.711459	1.48615	0.290947	8.27102	2.89499	51.1554	16.5775	111.32	18.2578	319.737	37.7262	89.4408	76.9007	125.021	929.647	11123.6	0.758884	0.460098	20.5548	1	1	576.745	9.02802	64.0985	503.619	55.784	1.6494	0.6151	818.384
124	0.0178843	7.31239	0.0463887	0.666364	1.19211	0.495021	6.91753	2.21204	43.257	13.7091	101.958	17.7692	328.112	44.3061	81.5524	76.752	146.768	833.336	11097.4	0.857781	1.22521	6.5741	1	1	567.971	8.04302	54.0737	505.854	62.8935	0.700109	0.522947	707.96
125	0.0177956	6.88999	0.0407725	0.896057	2.76946	0.425521	22.4745	8.7622	188.002	63.4897	464.967	78.903	1375.05	171.632	98.3727	91.7812	216.205	3705.05	12291.9	1.72037	1.13557	13.2763	1	1	2384.32	7.84461	222.434	2154.04	274.589	1.51498	0.42451	773.225
126	0.0215175	3.33747	0.0332489	0.532429	2.09868	0.164705	19.5386	9.7275	231.109	82.6882	642.877	111.627	1986.79	245.157	96.1465	52.1654	343.694	4984.81	13298.3	1.89507	1.39091	6.5575	1	1	3335.7	3.92467	262.638	3069.14	782.012	1.36247	0.151779	707.74
127	0.775584	14.6956	0.458962	3.70533	3.35547	0.588353	16.5832	5.47955	99.0244	30.9063	216.54	34.368	593.724	76.3858	49.799	85.3594	101.403	1957.96	10315.4	0.76173	0.356791	9.76589	1	1	1096.59	19.6355	125.031	951.923	48.4797	2.13495	0.841787	743.672
128	81.4673	232.38	22.083	96.0501	19.8298	1.88061	31.7858	7.07309	106.068	28.415	183.931	28.7708	487.436	59.1586	107.643	249.192	138.786	1668.13	10822.6	3.37801	1.45889	19.1723	1	1	1386.33	431.98	166.637	787.711	1.82349	2.31546	1.79551	810.931
129	0.0229448	8.68322	0.0606988	1.28927	4.27463	0.900068	31.058	10.0779	172.213	45.5122	274.132	39.7404	618.823	69.7564	103.793	166.331	289.536	2763.18	13144	2.54755	1.17811	5.08503	1	1	1276.54	10.0561	218.524	1047.96	104.211	2.1624	0.574476	686.097
130	0.0165733	19.3744	0.0723634	1.48779	2.93513	0.640303	17.0674	5.45755	97.2476	28.9015	191.247	30.8461	528.778	64.1105	63.0733	125.492	264.687	1657.97	10915.7	2.0536	0.974125	10.4183	1	1	988.183	20.9511	123.348	843.884	40.2787	2.10814	0.474115	749.756
131	0.0875076	13.6299	0.0940585	1.45856	3.40543	0.325807	20.82	6.89603	125.849	37.2989	244.993	37.4888	603.978	70.1514	167.152	336.333	367.432	2147.34	11680.9	2.01503	1.05592	8.2048	1	1	1166.48	15.2701	157.296	993.91	65.0888	1.90833	0.91536	727.64
132	0.0225664	5.53053	0.209819	4.30312	7.64754	0.448311	39.2509	10.7725	179.294	48.4952	294.801	41.8027	648.501	75.8238	67.4977	141.849	228.266	2744.2	9565.14	0.886942	0.374587	4.25394	1	1	1356.9	10.066	237.413	1109.42	110.215	2.36778	0.621418	671.471
133	31.6051	63.8772	4.96592	25.5502	44.363	19.0161	244.111	54.5363	593.147	103.144	456.529	53.2445	732.272	76.9618	88.0854	276.661	298.141	6188.45	10264.5	2.54297	0.941123	138.179	1	1	2503.32	125.998	955.173	1422.15	11.2871	2.70206	0.927954	1071.33
134	0.095042	1.67127	0.0660842	1.0583	3.97545	0.303769	32.668	12.6382	259.721	80.5066	554.609	88.0441	1411.73	166.867	57.3039	64.9243	330.971	4893.75	13595.4	0.864456	0.6279	5.62109	1	1	2613.95	2.89069	309.306	2301.76	796.266	1.37674	0.196163	694.512
135	0.446351	2.32628	0.209578	2.41096	5.04665	0.280193	35.1476	11.5932	222.788	66.2898	431.28	64.753	1042.89	121.294	30.5118	48.7229	142.387	3892.79	11567.5	0.610684	0.333626	8.73807	1	1	2006.76	5.39317	274.855	1726.51	320.129	1.83045	0.342186	733.377
136	0.387546	3.58603	0.238946	2.223	3.75725	0.655503	24.367	8.26868	146.923	42.4926	275.712	42.3325	682.97	80.4783	84.4216	110.644	495.545	2532.55	11245.2	1.10512	0.697008	6.56809	1	1	1314.39	6.43552	183.971	1123.99	174.653	1.58552	0.223277	707.881
137	0.0379121	17.1483	0.125428	2.26788	5.19321	1.44529	30.3707	9.11513	149.735	40.8167	267.19	42.3292	708.379	86.4484	153.125	348.281	736.877	2508.43	10676.1	1.41216	0.781171	5.19468	1	1	1360.6	19.5795	195.86	1145.16	58.488	1.80775	0.472645	687.876
138	0.0935844	4.81258	0.0827014	1.41922	3.04715	0.0382444	21.93	8.36555	168.429	50.8	336.406	51.7055	828.336	93.0148	85.1645	193.303	299.705	3042.03	12560.1	1.532	0.964722	16.0135	1	1	1568.48	6.40809	201.81	1360.26	212.273	1.58803	0.644978	792.125
139	0.00319054	3.34401	0.0578316	0.954369	2.67763	0.188677	16.4943	5.14268	93.1736	27.519	184.082	28.7657	465.124	55.3312	96.1244	211.213	366.638	1596.24	12265.1	1.59255	0.931643	18.2018	1	1	882.859	4.35941	117.677	760.823	174.524	1.7094	0.576081	805.437
140	6.74315	32.8383	2.30958	12.4937	6.5613	0.894185	28.9149	9.22533	175.084	53.9229	371.352	58.5591	1020.6	122.596	83.2571	211.948	238.525	3202.41	10499.8	3.22665	1.09821	4.2648	1	1	1902.09	54.3847	220.68	1627.03	29.917	2.93811	0.888575	671.677
141	2.21451	16.6076	0.863043	5.30779	4.67776	1.085	27.0096	8.64692	162.776	49.5282	336.484	53.1657	889.225	108.339	101.697	234.55	409.549	2961.89	10265	2.7491	1.35763	6.94269	1	1	1665.93	24.993	204.196	1436.74	57.4858	2.02493	0.572702	712.733
142	0.440532	6.72386	0.197861	1.98904	3.99454	0.0725207	29.817	10.8261	213.139	65.5902	450.335	70.1949	1127.39	132.317	124.07	246.711	607.644	3914.98	11895.1	1.79305	1.05301	5.93775	1	1	2113.03	9.3513	257.849	1845.83	197.387	1.70278	0.406012	699.176
143	0.133255	1.19822	0.0570558	1.04405	3.01805	0.0345403	28.361	12.904	283.937	94.4619	672.933	107.951	1726.21	198.4	75.1637	89.1643	492.559	5674.67	13163.6	1.0578	0.654467	4.06363	1	1	3130.65	2.43258	328.254	2799.96	1151.02	1.61628	0.181023	667.792
144	0.0119112	11.6195	0.0765318	1.52288	3.36591	0.906214	17.8891	5.25755	93.5109	27.3798	185.875	30.1026	515.904	64.7978	32.962	87.6675	121.261	1677.62	9706.88	0.887385	0.439279	7.53515	1	1	958.22	13.2308	120.93	824.059	62.2833	2.02009	0.722967	719.985
145	5.01416	35.0313	2.05182	12.7861	12.2305	0.691169	63.455	19.9057	363.712	106.616	698.308	106.641	1702.33	195.626	184.292	385.809	896.553	6259.74	10265.1	10.5677	2.928	5.51246	1	1	3324.4	54.8833	459.994	2809.52	51.1909	3.60918	0.430325	692.862
146	0.0215562	7.16677	0.0241181	0.664573	1.87455	0.353408	13.2029	4.77422	94.5944	29.8081	212.981	37.1907	667.096	81.8673	119.054	168.827	789.736	1840.13	13909.8	1.90484	1.89244	7.43671	1	1	1151.62	7.87702	114.799	1028.94	130.626	1.00656	0.213777	718.814
147	0.0179323	2.17648	0.0974024	2.33511	4.97785	0.548904	34.2675	11.9086	217.376	57.247	329.266	45.9954	678.966	73.9798	51.7852	78.1343	355.514	3434.23	12389.3	0.824615	0.502092	9.24292	1	1	1459.16	4.62693	269.079	1185.45	256.208	1.64236	0.219778	738.55
148	0.175013	14.4106	0.888433	10.8258	18.2324	3.56873	99.0714	31.9059	562.536	155.498	967.946	139.377	2124.29	231.165	241.309	569.413	921.66	8944.71	10423.5	4.49224	1.84579	32.2009	1	1	4359.89	26.2999	715.315	3618.27	137.578	2.43377	0.617813	869.006
149	0.0133688	0.724779	0.116657	2.69242	9.36036	0.145316	64.8708	18.3812	249.54	52.9182	262.216	33.2368	470.833	49.1961	42.2201	61.5808	323.324	3162.28	12594.5	0.377118	0.211722	23.5135	1	1	1214.24	3.54723	342.297	868.4	244.811	1.7812	0.190462	833.072
150	3.01719	9.26884	1.35645	7.4919	5.88794	0.114788	34.687	13.9368	274.344	82.9076	560.447	89.9918	1464.9	165.816	55.8631	52.6727	483.689	4994.77	12744.4	0.532697	0.547411	7.21748	1	1	2714.17	21.1344	328.97	2364.07	111.859	0.973121	0.108898	716.158
151	0.00105293	1.86741	0.0257635	0.799571	2.65753	0.174503	20.5305	7.34852	146.386	47.634	333.554	53.0944	897.738	109.961	33.397	76.8395	218.62	2738.17	11965.1	1.3704	0.758549	9.75707	1	1	1621.77	2.6938	177.097	1441.98	535.297	1.80661	0.351475	743.587
152	0.268097	5.75351	0.244935	3.63494	7.64464	0.219107	45.6472	14.4587	253.96	70.9614	442.361	65.1281	1004.74	112.126	69.1412	216.428	369.385	4145.56	10205.2	1.26345	0.699947	17.9778	1	1	2027.15	9.90148	321.93	1695.32	171.218	1.80506	0.585916	804.136
153	0.0812954	1.83748	0.247017	3.60169	9.17126	2.38487	53.6789	15.3757	219.985	50.0641	265.33	34.7731	494.753	50.3577	69.9311	169.365	499.271	3062.36	11423.9	0.727205	0.517635	14.045	1	1	1201.64	5.76748	300.596	895.278	155.229	1.40486	0.339225	778.829
154	0.0268346	3.7036	0.0912223	1.48773	3.39355	0.250579	21.1465	7.25934	127.687	33.7047	197.059	26.6545	405.095	45.6986	43.2375	114.652	311.365	1981.4	11586.2	1.7436	0.990755	10.6047	1	1	873.258	5.30938	159.737	708.212	133.389	1.75987	0.368224	751.437
155	0.0367645	1.49368	0.228274	4.33336	12.8876	0.105438	56.8654	12.2012	126.825	17.9419	55.3449	4.55038	41.0117	2.65041	25.6785	65.71	185.058	1118.54	12777	0.313915	0.135314	10.8621	1	1	336.476	6.09208	208.885	121.499	19.9438	2.3199	0.355078	753.719
156	0.0159505	26.7782	0.148918	3.11581	3.53338	1.2006	12.0039	2.96069	44.5783	11.3266	69.5111	10.0999	170.758	21.3408	15.4377	73.2031	36.7677	660.447	9268.37	0.821368	0.280963	16.8779	1	1	377.373	30.0589	64.2769	283.037	9.41607	2.9234	1.99097	797.549
157	0.0296923	1.03573	0.103976	2.18701	9.08724	3.30294	57.7281	15.7175	194.948	39.5927	176.495	21.8158	299.854	29.4079	75.1754	83.5035	832.784	2336.17	12750.7	0.695147	0.397572	22.1789	1	1	851.306	3.35641	280.784	567.166	168.98	1.74848	0.10027	826.641
158	2.1873	23.9216	2.43014	17.2735	10.554	2.49906	29.8618	6.52908	90.9907	21.1393	114.822	15.9376	243.645	25.9209	34.0064	142.408	135.448	1201.38	8608.02	0.664337	0.266371	18.5459	1	1	607.711	45.8125	140.435	421.464	9.19977	2.49403	1.05138	807.412
159	15.0167	50.855	4.38643	27.6854	15.4389	3.21608	41.928	9.26111	120.769	26.6688	137.729	18.2099	266.792	29.184	24.404	112.374	76.5341	1525.7	9096.5	1.25516	0.481469	18.8138	1	1	767.14	97.9434	190.613	478.584	4.88633	2.60694	1.46828	808.928
160	0.0137337	22.4205	0.117908	2.03423	3.97309	1.19589	19.0094	5.13217	81.213	21.2135	130.561	19.5515	323.637	38.9785	45.6182	179.905	222.082	1266.35	9777.22	0.939698	0.404505	16.6708	1	1	669.051	24.5864	110.524	533.941	21.717	2.32308	0.810086	796.27
161	0.0530834	9.62633	0.188504	5.30218	12.8932	0.477825	73.4106	22.1109	376.002	104.936	644.797	91.8968	1391.54	154.419	89.041	402.302	383.873	6014.21	10560.7	2.59991	1.0696	8.2707	1	1	2887.65	15.1701	484.895	2387.59	157.388	2.43074	1.04801	728.365
162	0.0703133	2.12751	0.0631425	1.17969	3.0038	0.279264	20.2308	6.85891	134.478	42.8027	296.363	47.6722	811.376	99.7955	34.3408	97.6704	263.114	2510.99	10558.3	1.12221	0.443865	11.4428	1	1	1466.3	3.44066	164.85	1298.01	377.256	2.52828	0.37121	758.711
163	0.0158946	12.8772	0.151621	2.10151	3.72328	1.3247	21.9828	6.84118	120.752	32.8544	214.596	32.9174	552.069	66.0075	94.2576	301.182	728.347	2027.65	10861.6	2.1119	1.35954	5.66174	1	1	1068.21	15.1463	154.624	898.444	59.3179	1.55339	0.413514	695.123
164	0.00160125	5.4536	0.0576173	1.01918	2.32006	0.0889267	12.8371	4.52573	83.1337	24.1676	161.496	25.6044	424.516	49.7144	85.2001	191.991	770.535	1434.25	14287.9	1.71993	1.64133	8.28917	1	1	794.935	6.53199	102.906	685.498	104.945	1.04789	0.249166	728.567
165	0.208147	26.991	0.243171	3.81114	6.97222	2.71641	34.9195	10.166	164.681	44.8748	282.996	43.4684	713.326	83.9935	108.25	376.949	623.435	2670.83	10449.6	2.07395	0.918543	7.36405	1	1	1419.37	31.2535	219.455	1168.66	37.3929	2.25786	0.604633	717.941
166	0.00785227	6.95074	0.0591819	1.24379	2.86505	0.293972	14.9604	4.33385	72.4191	19.5555	121.838	17.9028	285.577	33.3659	15.5075	46.3672	107.095	1144.18	9544.69	1.49873	0.551873	5.2824	1	1	581.373	8.26156	94.8724	478.239	57.8872	2.71571	0.432956	689.277
167	0.00274754	10.4729	0.0281829	0.582047	1.02702	0.317243	5.82228	1.90134	36.3731	11.692	86.8009	15.4667	286.921	37.7106	37.0964	172.21	154.28	748.146	10299.9	1.29856	0.87998	9.68709	1	1	495.118	11.0859	45.441	438.591	39.563	1.47567	1.11622	742.915
168	0.00876627	10.2731	0.0724677	1.51473	3.44758	0.250681	18.5682	6.17803	113.067	33.3183	222.843	35.9775	597.444	69.3181	41.4995	188.098	175.99	2010.05	12445.9	1.96579	0.897184	8.61686	1	1	1112.28	11.8691	141.511	958.901	80.7897	2.19107	1.0688	732.099
169	0.000386113	5.86894	0.378154	8.02072	11.9843	0.682112	47.3107	10.7902	138.852	26.2304	110.144	12.2888	146.953	13.2707	34.7083	150.785	178.603	1554.8	11264.8	0.915038	0.433758	10.1197	1	1	532.775	14.2682	209.62	308.887	21.6486	2.10956	0.844249	747.011
170	0.0510724	6.11112	0.273087	4.85493	8.2726	0.705149	37.9665	9.92911	145.79	36.1274	206.346	28.6629	423.97	47.1625	24.7839	90.8926	146.224	2124.94	9396.17	1.87127	0.579578	14.3205	1	1	956.223	11.2902	202.663	742.269	65.7445	3.22868	0.621598	780.778
171	0.0337066	9.84954	0.07518	1.11672	2.24724	0.232772	12.3445	3.28464	52.4753	13.95	87.4241	14.4225	252.608	30.7681	66.5195	304.796	271.177	851.914	9593.98	1.96891	0.837269	11.2633	1	1	480.832	11.0751	70.5844	399.172	36.0422	2.35159	1.12397	757.19
172	0.00801017	5.95845	0.0163352	0.336666	0.758076	0.327265	4.95137	1.88702	39.6787	13.1178	100.047	18.4172	360.926	48.5374	20.6496	50.1035	199.431	804.169	10841	1.75415	1.28266	7.99072	1	1	594.967	6.31946	47.6024	541.046	85.6158	1.36759	0.251233	725.25
173	0.0988431	6.05287	0.157326	1.81482	4.00918	1.57557	27.4305	10.2808	200.608	60.4519	414.729	65.3993	1066.82	128.866	34.3149	104.793	313.459	3631.19	11668.3	2.69318	1.07363	271.514	1	1	1988.29	8.12386	243.904	1736.27	213.724	2.50848	0.33431	1191.66
174	0.323877	4.02316	0.446883	5.98956	9.82241	0.773922	68.422	25.7851	520.571	160.994	1098.2	172.288	2811.92	319.484	41.2038	96.9825	421.715	10004.5	12141	0.928526	0.709136	7.53931	1	1	5199.04	10.7835	625.375	4562.88	423.136	1.30938	0.229972	720.035
175	0.0029177	11.6501	0.0343387	1.02712	2.53657	0.171902	17.9183	6.34847	126.072	39.6033	270.376	42.8637	694.917	81.7901	58.5991	243.98	362.628	2339.31	11334.2	1.73773	0.991262	5.8758	1	1	1295.31	12.7145	153.048	1129.55	88.8393	1.75305	0.67281	698.28
176	0.0104108	20.1273	0.0691478	1.31114	2.75495	0.685025	18.1813	6.0838	116.945	36.5279	255.341	41.5943	712.231	88.5445	74.9696	328.363	465.798	2202.14	11095.8	1.67069	1.08223	9.7614	1	1	1300.41	21.518	144.65	1134.24	52.711	1.54375	0.704948	743.629
177	0.0461344	4.10835	0.0809741	1.57334	3.67436	0.29745	24.2182	7.86524	139.976	41.4847	278.39	43.6162	725.466	87.2036	57.3645	216.761	439.936	2429.1	10405.7	2.12243	1.12951	7.75523	1	1	1358	5.80881	176.032	1176.16	202.479	1.87907	0.492709	722.56
178	0.0388255	9.3468	0.200815	3.14156	5.56512	0.55383	30.8671	9.02081	152.549	42.4026	263.886	39.0796	617.779	70.6935	67.2888	326.173	381.799	2555.66	9822.53	0.873445	0.527312	13.02	1	1	1245.12	12.728	198.556	1033.84	81.2257	1.65641	0.854304	771.298
179	0.0160451	14.6556	0.124478	1.83739	4.15487	1.34842	26.8773	8.56938	150.286	42.1818	262.306	39.5701	633.847	74.2324	35.3962	99.6513	350.316	2411.73	10993.6	1.37696	0.834283	6.31383	1	1	1260.01	16.6335	191.236	1052.14	63.2541	1.65047	0.284461	704.456
180	0.0270926	2.61862	0.116221	2.45701	6.7187	0.180275	27.1686	4.75668	36.454	4.58483	11.994	0.928156	9.97364	0.790176	46.0071	125.875	495.646	263.14	13125.5	0.207479	0.040602	9.15721	1	1	108.768	5.21894	75.2783	28.2708	5.41697	5.11006	0.253961	737.689
181	0.0149608	1.98039	0.0594198	1.14216	3.70223	0.265427	16.5875	3.51932	45.0706	9.23652	44.9692	6.02856	91.0869	8.01713	21.4143	39.41	253.96	539.928	13029.1	0.192856	0.0501941	8.04657	1	1	231.68	3.19693	69.145	159.338	49.841	3.8422	0.155181	725.878
182	0.00504197	13.5923	0.111479	1.87989	4.89443	1.37104	33.5341	11.4284	211.802	63.4574	429.066	67.1248	1150.56	144.236	70.3	324.468	457.48	3797.74	8772.27	2.60216	1.00812	6.8556	1	1	2133.07	15.5887	263.03	1854.45	118.961	2.58121	0.70925	711.625
183	0.00512185	4.86307	0.0466645	1.27007	3.80616	0.192606	26.7061	8.75499	167.764	49.974	327.269	50.7279	801.657	97.1207	48.5203	186.551	420.19	2903.02	11645.1	2.01986	1.01417	7.56902	1	1	1540.16	6.18493	207.223	1326.75	214.513	1.99164	0.443967	720.386
184	0.015726	1.94229	0.0360369	0.79752	2.85083	0.274454	28.4819	11.9984	258.411	86.3744	621.036	99.9991	1644.17	197.163	36.4017	101.989	424.272	5212.76	12136.9	1.28343	0.965031	5.80991	1	1	2953.55	2.79157	302.017	2648.74	948.836	1.32994	0.240385	697.318
185	19.419	68.1088	4.45454	18.5984	4.99827	0.992891	14.6586	4.25584	71.2011	20.6494	140.263	22.9874	399.441	51.3743	45.3838	422.395	313.579	1298.29	10041.9	1.58821	0.67303	17.1241	1	1	841.402	110.581	96.1066	634.715	5.73984	2.35979	1.34701	799.053
186	0.57083	40.4551	0.246532	2.62928	4.18395	1.08235	23.9656	7.64396	145.239	45.9114	334.365	57.5622	1056.7	136.461	75.5752	752.424	835.157	2898.9	11252.3	3.50026	1.4999	4.83755	1	1	1857.01	43.9018	182.114	1631	37.151	2.33365	0.900936	681.963
187	0.0237016	21.9226	0.0275475	0.562878	1.70077	0.545581	13.5776	4.85073	99.1051	33.0715	250.49	44.391	850.06	119.689	26.5865	234.045	351.878	2114.29	11947.4	3.25118	0.831826	2.76379	1	1	1440.02	22.5368	119.78	1297.7	57.5815	3.90849	0.665131	637.903
188	0.0181898	19.4231	0.190521	3.7235	7.79223	1.17486	46.7217	14.7798	273.496	81.9735	547.257	84.4918	1363.48	161.922	71.6093	669.785	815.446	4910.06	10174.2	2.62224	1.10728	6.59214	1	1	2606.45	23.3553	343.964	2239.13	95.8724	2.36819	0.821372	708.199
189	96.6619	286.263	35.6893	185.931	46.0704	1.82474	81.8024	19.1225	310.518	88.7633	583.848	91.9742	1524.6	185.577	61.2397	571.911	861.291	5229.51	11024.6	4.87281	1.909	2.48976	1	1	3538.65	604.545	459.338	2474.77	4.0936	2.55254	0.664015	630.131
190	0.151197	16.0188	0.903392	21.3356	160.887	102.257	23.25	9.15	116.35	39.6	196	216.278	2464.26	233.62	37.4	557.029	465.653	1502	9651.82	1.1227	1.15144	8.4075	1	1	3600.06	38.409	411.894	3149.76	82.0058	0.975035	1.19623	729.855
191	0.0304533	14.3135	0.0477216	0.71292	2.29265	0.687166	11.979	3.67702	66.606	19.5451	127.846	20.3206	349.547	41.8847	14.2272	147.589	197.675	1145.67	10718.4	0.730422	0.406646	14.2069	1	1	659.49	15.1046	85.2419	559.143	37.0182	1.79621	0.746622	779.978
192	0.757747	50.2927	0.31164	3.15097	4.72961	1.63901	30.1065	10.3429	201.053	63.6445	462.231	77.1243	1352.54	175.297	57.0402	690.943	766.678	4023.56	10645.2	4.3293	1.61455	9.19134	1	1	2433.22	54.5131	247.871	2130.83	39.0885	2.68144	0.901217	738.033
193	0.367072	18.9789	1.02372	18.0204	52.3971	31.7218	297.57	73.3209	902.704	172.733	818.293	102.605	1503.15	163.001	47.6972	1775.13	1096.62	10048	9155.44	3.04291	1.11351	36.4415	1	1	4155.88	38.3901	1357.71	2759.78	71.8879	2.73271	1.61873	883.793
194	0.00712022	54.7148	0.109127	1.81668	3.39842	1.40878	17.4515	5.51838	64.6185	25.9213	128.314	30.905	322.853	76.72	485.218	452.027	512.806	857.79	11155.9	2.45901	0.903472	11.522	1	1	733.756	56.6477	92.3955	584.713	10.3219	2.72173	0.881478	759.376
195	0.174617	29.8076	0.235192	2.93111	5.36076	2.73357	23.2399	7.35095	82.8478	30.2925	137.553	31.0829	307.965	67.0065	401.489	286.038	591.877	937.636	12292.1	2.90633	0.973781	10.0148	1	1	728.582	33.1485	121.533	573.9	17.313	2.98458	0.483272	746.031
196	0.0382549	31.5898	0.10413	1.32709	2.16452	0.663046	10.2722	2.87371	30.4698	11.0084	48.8493	10.7878	112.041	24.1373	151.364	220.465	230.968	349.281	10663.9	0.815666	0.350779	8.38962	1	1	286.327	33.0592	46.4433	206.824	6.25617	2.3253	0.954526	729.662
197	0.0126571	16.2226	0.09957	1.99188	3.66235	0.369393	17.0852	5.08365	54.9573	20.5447	87.9283	17.9315	163.279	33.0462	65.9531	94.546	118.799	597.705	10557.4	1.89962	0.792723	14.6961	1	1	422.215	18.3267	81.1579	322.73	17.6098	2.39632	0.795846	783.385
198	0.0217199	4.26675	0.0573278	1.25742	3.86788	0.204204	24.0861	9.10782	118.295	48.507	227.801	48.6442	441.271	86.5684	243.462	130.572	594.95	1441.89	12763.3	2.24907	1.66351	7.58555	1	1	1013.96	5.60321	155.561	852.792	152.197	1.35201	0.219468	720.58
199	0.0102315	12.7863	0.140493	2.91339	6.14016	0.629022	32.046	9.8554	107.098	37.613	157.738	32.0218	277.326	54.0628	70.4102	109.577	164.219	1119.65	11290.6	1.35881	0.713808	3.79924	1	1	730.38	15.8504	155.768	558.761	35.2522	1.90361	0.667259	662.435
200	0.0253746	14.2613	0.102668	1.46002	3.02135	0.877395	21.1108	7.54033	89.744	34.3376	157.354	33.3574	316.121	63.1408	52.3546	77.1085	126.666	1019.66	10465.8	3.73014	1.75955	36.967	1	1	742.454	15.8493	122.294	604.311	38.1285	2.11994	0.608753	885.529
201	0.170174	19.0637	0.248314	3.51637	5.45722	1.0569	22.5314	6.63803	67.6018	23.2777	96.5656	19.4604	175.028	33.7663	100.371	180.569	214.17	681.877	10745.8	0.692856	0.291239	6.11296	1	1	474.382	22.9985	103.285	348.098	15.1357	2.379	0.84311	701.669
202	0.0497676	47.8263	0.0541597	1.76551	4.81943	1.25008	27.6009	8.65637	97.3043	35.3751	155.069	32.471	295.118	59.852	94.1003	274.16	300.295	1090.29	11335.7	2.37082	1.04408	8.72765	1	1	767.212	49.6957	139.631	577.885	11.6285	2.27072	0.91297	733.268
203	0.0247611	31.2833	0.190115	3.39779	6.29817	1.52983	31.2052	10.3876	123.582	46.7647	210.738	44.5081	410.601	82.7252	54.4091	166.243	136.091	1415.04	10380.5	1.93432	0.94399	14.5419	1	1	1003.24	34.8959	173.003	795.337	22.7917	2.04909	1.22155	782.321
204	0.143025	5.43776	0.0965408	1.50359	4.9366	0.633512	36.8895	15.5918	209.128	87.2909	414.901	90.6077	862.524	171.251	94.0765	85.364	271.243	2525.96	12751.9	1.08605	0.756998	5.60799	1	1	1900.94	7.18092	267.18	1626.58	226.514	1.43468	0.314715	694.314
205	0.0629327	8.12066	0.474142	6.70079	8.66803	1.34572	31.9841	8.76963	88.5318	30.4657	124.881	25.0945	226.779	45.3859	30.7961	49.9647	65.7262	882.532	8363	0.896308	0.338538	23.1278	1	1	607.264	15.3585	139.299	452.606	29.4694	2.64758	0.760195	831.244
206	1.19635	7.90952	0.408384	2.67123	4.72714	0.434273	31.9097	13.5789	176.507	73.5191	345.922	75.6626	707.724	142.301	70.9459	69.6916	292.092	2200.21	12937.8	1.01791	0.819095	8.1758	1	1	1584.47	12.1855	227.157	1345.13	110.388	1.24273	0.238595	727.319
207	0.0332233	6.69343	0.121774	1.94267	3.98168	0.49096	27.5482	10.2284	129.349	50.3697	228.76	49.8046	474.703	94.7074	29.1959	89.095	110.184	1452.9	12575.8	1.75814	1.07623	16.1685	1	1	1078.73	8.7911	171.599	898.344	102.188	1.6336	0.808605	793.115
208	0.00663835	5.86445	0.119584	1.22322	3.4609	0.318738	22.0857	8.18964	104.513	41.2946	194.265	42.877	413.101	83.9219	30.828	75.9526	118.952	1217.97	12549.8	1.71383	0.927622	16.2201	1	1	921.241	7.2139	138.568	775.46	107.495	1.84755	0.638515	793.442
209	0.0284226	30.2223	0.105084	1.40441	2.70169	0.6954	12.6161	4.2566	47.0979	16.8111	76.2615	16.1442	151.322	30.0049	20.0237	78.959	71.2141	511.125	10762.7	1.72517	0.711008	15.58	1	1	389.672	31.7602	67.3677	290.544	9.14806	2.42638	1.10876	789.315
210	0.0174057	2.72102	0.108479	2.22749	3.97146	0.447176	20.6323	6.14858	72.2767	28.5168	125.865	26.0582	237.413	47.7755	11.4494	37.8135	44.1244	804.876	11175	1.51541	0.559801	11.595	1	1	574.179	5.07439	103.476	465.629	91.7605	2.70705	0.856975	759.985
211	0.0166339	8.14523	0.0319712	0.668105	1.5995	0.217288	9.05385	3.28947	40.4453	15.9731	73.3169	15.8332	149.438	30.3217	26.0037	57.101	105.255	469.789	11592.7	1.73368	0.934034	14.6771	1	1	348.35	8.86194	54.6054	284.883	32.1468	1.85612	0.542503	783.255
212	0.00457809	12.6174	0.0812896	1.42091	3.07913	0.547745	17.0468	5.80853	69.2212	27.1351	123.965	25.8987	238.485	48.2799	103.363	210.607	417.941	811.05	10116.8	1.56278	0.949624	9.20803	1	1	573.591	14.1242	95.7034	463.764	32.8346	1.64568	0.503916	738.201
213	1.11583	12.3061	0.70888	6.47033	7.83384	0.896539	39.897	13.3089	155.265	57.2169	246.241	49.1612	432.909	85.3158	60.2415	93.2567	280.182	1640.45	10126.7	2.3906	0.866524	150.907	1	1	1108.65	20.6012	217.201	870.844	42.2715	2.75884	0.332843	1085.89
214	91.4067	210.01	23.1023	98.4504	22.9077	0.840216	37.9273	10.3913	109.234	39.4127	168.442	33.5805	286.356	54.9024	52.126	126.361	222.355	1065.24	11522.1	4.1882	1.64975	8.57749	1	1	1186.96	422.97	181.3	582.694	1.37762	2.53868	0.568284	731.68
215	0.0409432	10.699	0.064249	1.40441	3.16553	0.769604	19.202	6.80354	83.2774	31.6244	144.267	30.3856	283.147	58.0888	40.1401	92.2518	178.919	942.795	10747.7	1.38094	0.790912	4.91775	1	1	672.94	12.2086	113.218	547.513	44.8464	1.74601	0.515608	683.321
216	0.0167633	2.66229	0.28582	5.89519	13.4888	0.831266	55.7954	13.2362	103.328	25.8968	85.6174	14.2983	110.915	19.8476	97.852	136.703	457.896	778.936	13071.3	0.729165	0.407633	10.0906	1	1	452.115	8.86006	186.68	256.576	28.9587	1.78878	0.298546	746.74
217	0.306124	12.3214	0.235566	2.18601	3.22411	0.0948787	17.39	6.45218	81.0657	32.1551	148.678	32.233	301.31	58.3789	66.0062	91.3785	320.959	999.417	12104.2	2.71507	1.17516	7.39694	1	1	696.031	15.0491	108.227	572.755	38.0592	2.31038	0.284705	718.337
218	0.291613	5.43176	0.3203	3.38399	7.59702	1.55753	50.1244	16.2006	191.187	70.3741	312.99	66.2416	603.305	116.181	149.72	114.749	759.744	2040.63	13751	1.91798	1.09526	8.73496	1	1	1445.19	9.42767	266.667	1169.09	124.006	1.75117	0.151036	733.344
219	0.565232	13.5244	0.354019	3.47443	5.52792	1.57873	27.22	9.23011	109.106	42.3115	192.164	41.1806	385.665	79.3204	62.0303	96.5518	295.5	1245.6	12142.4	1.31764	0.840538	5.67554	1	1	911.223	17.9181	152.663	740.641	41.3348	1.56762	0.32674	695.329
220	384.927	14.9	103.604	431.452	60.9211	6.45262	44.528	7.07993	61.6111	21.2163	93.1223	19.5862	187.584	39.4196	23.8141	85.8478	100.422	640.646	8115.81	1.82708	0.680205	33.4689	1	1	1476.4	934.883	180.593	360.929	0.386068	2.68607	0.854871	873.581
221	24.5097	68.1008	5.88862	27.8435	10.8921	2.08383	37.858	12.6195	143.995	52.0644	223.246	45.4805	403.935	75.8033	112.923	208.543	572.991	1496	12837.7	6.05564	2.66776	20.1646	1	1	1134.32	126.343	207.448	800.529	6.33618	2.26993	0.363955	816.322
222	0.00710519	11.6922	0.0412272	1.09844	2.40313	0.804211	13.6712	4.99172	63.2347	26.6204	133.605	31.2083	316.155	71.1605	33.2647	59.0101	158.873	843.003	9623.69	0.95466	0.411551	3.48023	1	1	676.693	12.839	85.1049	578.749	45.0776	2.31967	0.371429	655.543
223	0.0133861	8.23024	0.0810933	1.3761	3.32665	0.34315	22.3499	7.97828	92.9052	35.1953	163.016	33.8996	309.501	59.8842	31.3144	73.6236	161.483	1105.61	11187.3	2.71587	1.22061	19.6814	1	1	738.099	9.70082	126.903	601.495	62.0046	2.225	0.455923	813.724
224	14.8514	48.5929	5.19406	25.7352	10.9971	0.906783	39.0948	12.8577	153.077	59.6874	269.889	57.3754	538.957	111.041	43.3418	74.2592	258.904	1737.87	10331.7	1.07949	0.413671	10.0599	1	1	1348.26	94.3735	216.934	1036.95	10.9877	2.60953	0.286821	746.453
225	10.3669	41.4287	4.2439	24.4537	18.5468	5.55969	75.4876	24.0165	245.764	83.2449	353.099	73.283	644.594	118.538	125.216	235.53	744.916	2554.83	13315.9	28.5158	8.88636	177.877	1	1	1722.63	80.4932	369.375	1272.76	15.812	3.20894	0.316183	1113.93
226	0.320925	5.01437	0.223438	3.48566	7.49999	0.250359	49.1976	18.0505	220.83	85.6335	372.465	75.0718	667.798	127.302	91.1894	159.23	440.19	2443.12	13022.4	3.31786	1.40368	9.0993	1	1	1633.14	9.04439	295.829	1328.27	146.861	2.36369	0.361731	737.103
227	0.0490414	4.50515	0.15162	2.07122	7.07481	2.91775	42.3302	15.8038	188.521	69.6033	325.735	71.7689	677.038	133.066	80.1538	91.8647	608.614	2165.11	14121.9	3.19726	2.56522	7.96665	1	1	1540.64	6.77703	256.647	1277.21	188.462	1.24639	0.150941	724.978
228	0.0100171	1.18967	0.0921784	1.85348	5.71036	0.344808	38.2573	13.6647	155.871	52.9685	208.16	38.9053	326.452	58.4788	39.3817	69.9104	269.912	1594.04	12906.6	0.676548	0.527475	31.3034	1	1	901.959	3.14534	213.849	684.965	217.771	1.28262	0.259012	865.68
229	0.180747	7.65863	0.152937	1.73685	3.24238	0.319669	19.1159	7.03532	84.6825	31.694	140.87	29.1137	263.461	50.5698	38.2936	130.852	259.118	937.944	11422.4	2.21729	0.984488	14.4356	1	1	639.833	9.72917	114.396	515.708	53.0064	2.25222	0.504988	781.582
230	0.0138964	4.24032	0.0982737	2.30939	6.12917	0.398474	37.151	12.1635	141.269	53.488	232.382	47.0779	422.044	83.1893	52.9511	146.209	353.635	1546.85	10161	2.02158	0.821181	5.01362	1	1	1041.95	6.66188	197.111	838.181	125.817	2.46179	0.413446	684.922
231	0.100769	5.43869	0.216131	2.30667	5.48887	0.782595	31.5856	11.2228	143.662	57.0073	260.092	58.0083	566.395	115.787	120.3	187.443	891.369	1690.74	18605.2	3.52148	9.93027	16.7784	1	1	1258.09	8.06226	192.742	1057.29	131.141	0.354621	0.210287	796.936
232	0.0348212	3.05857	0.182845	3.47729	8.56257	0.406549	50.7021	16.0347	184.476	67.7217	295.741	61.174	536.551	112.316	35.6977	117.102	226.581	1981.27	11675.8	1.39152	0.737593	11.6775	1	1	1340.44	6.75353	260.182	1073.5	158.954	1.88657	0.516822	760.67
233	0.639037	15.9058	0.936979	10.6869	16.9379	4.3078	85.7522	27.6385	295.31	105.527	442.2	89.0352	799.651	153.291	128.744	550.336	858.12	3154	11627.3	2.79954	1.50583	24.4145	1	1	2047.82	28.1687	429.946	1589.7	56.4351	1.85913	0.641328	837.25
234	0.0783206	2.55826	0.232697	3.83102	10.0319	1.57668	50.5985	16.914	171.808	50.1475	177.758	32.4242	262.097	46.1397	44.2826	84.8345	344.23	1482.59	14055.4	0.771601	0.437521	8.92296	1	1	826.196	6.70029	250.929	568.566	84.857	1.76357	0.246447	735.299
235	0.4545	7.16096	0.441039	6.14396	11.7026	0.344669	58.1293	17.8966	196.093	68.6062	283.155	54.7929	465.282	87.4757	48.545	188.537	255.351	1971.97	10871.4	1.49244	0.760813	9.49764	1	1	1257.68	14.2005	284.166	959.312	67.555	1.96163	0.738345	741.074
236	0.33773	2.15057	0.209077	3.51878	8.26417	0.192425	54.1384	19.9947	234.52	85.287	362.982	73.1179	639.239	120.467	98.1583	130.286	468.294	2517.81	12297.6	1.22758	0.722014	41.7862	1	1	1604.42	6.21616	317.11	1281.09	206.091	1.70021	0.278214	900.604
237	0.0794054	3.30096	0.12783	1.92306	4.28345	0.116445	25.7999	9.14603	108.151	40.3147	171.806	33.6637	292.365	55.1554	26.8452	69.2397	197.373	1183.91	13073.2	0.789934	0.451615	10.7722	1	1	746.233	5.43126	147.497	593.305	109.239	1.74913	0.350807	752.927
238	0.0585387	14.087	0.0656812	0.781761	1.97788	0.668366	11.1344	4.57062	56.5702	23.8867	118.36	28.2736	295.994	66.5895	54.2911	222.223	413.077	763.779	11770.8	1.69562	0.923037	10.5006	1	1	623.018	14.993	74.9214	533.104	35.5569	1.837	0.537968	750.501
239	0.00414522	3.15273	0.0272857	0.487702	0.848623	0.359475	3.16044	0.684464	4.55474	1.03121	2.82415	0.42178	3.30763	0.526689	3.074	9.36104	24.9619	31.282	11174.8	0.342665	0.189567	26.8433	1	1	21.3911	3.67187	9.60774	8.11146	2.20908	1.80761	0.375014	847.928
240	0.190181	12.971	0.229498	2.70122	5.21845	0.883661	23.255	7.12408	72.974	24.0072	98.6567	19.5563	171.841	31.8693	19.0461	90.3773	134.796	713.479	11174.5	0.899945	0.38835	12.9104	1	1	471.478	16.0919	109.455	345.931	21.4972	2.31735	0.670476	770.465
241	0.0312519	2.31654	0.0728523	1.07221	3.08805	0.664986	18.2836	5.94748	54.8317	16.5179	66.8037	14.5536	144.527	30.1001	65.3762	59.2664	579.907	505.325	13581	0.891847	0.581482	28.8324	1	1	358.811	3.49285	82.8158	272.503	78.0172	1.53375	0.1022	856.114
242	0.00617463	1.16782	0.00482182	0.132413	0.432096	0.332755	6.82701	3.27154	37.7567	10.85	32.2211	4.96981	35.8247	5.99684	65.373	5.25302	560.436	322.706	14569.2	4.52159	5.00991	19.8134	1	1	139.794	1.31123	48.6201	89.8624	68.5331	0.90253	0.00937309	814.439
243	0.0239448	11.642	0.146957	2.65901	4.44098	0.465672	20.5663	5.97194	60.7163	20.2935	82.6671	16.2666	142.693	26.918	36.0358	80.2148	303.495	600.048	10454.8	2.43344	1.13452	9.39323	1	1	395.471	14.4719	92.1613	288.838	19.9586	2.14491	0.264303	740.046
244	0.00340771	7.19081	0.0788961	2.07817	5.56957	0.254022	31.214	10.5814	121.179	44.3406	189.69	38.3704	341.705	62.8539	70.0442	172.719	585.98	1296.64	12803.4	2.86385	1.89043	8.72419	1	1	855.109	9.35128	168.798	676.96	72.3922	1.51491	0.294753	733.231
245	0.00761168	3.89424	0.054799	1.14503	3.39693	0.122216	21.9705	8.79406	115.791	45.8431	211.519	47.6259	441.267	87.8137	102.648	122.851	899.034	1374.57	12745.9	2.04428	1.46285	6.04376	1	1	989.244	5.10168	150.074	834.068	163.489	1.39746	0.136648	700.692
246	0.0933288	17.4624	0.155218	2.14723	3.91505	1.90453	19.9599	6.73383	77.9429	29.2972	129.333	27.1602	250.25	48.7876	14.8366	86.1742	109.916	891.635	9957.01	1.4882	0.420885	11.5136	1	1	615.143	19.8582	110.456	484.829	24.4146	3.53588	0.783997	759.305
247	0.0208995	16.2456	0.353809	7.0029	12.1647	0.646842	43.6729	11.188	105.43	33.5193	130.9	24.8459	216.742	39.8931	34.1352	332.831	218.452	991	11536.5	1.77553	0.620366	16.9097	1	1	642.627	23.6232	173.103	445.901	18.8755	2.86206	1.52359	797.744
248	0.135714	5.36249	0.594732	7.52456	9.03768	0.492171	20.2668	3.92509	28.3931	7.2352	23.617	4.17185	34.0394	6.11192	24.3223	120.262	203.569	213.27	10434.2	0.145454	0.0299096	9.79143	1	1	150.908	13.6175	62.1149	75.1754	5.52049	4.86313	0.590767	743.916
249	0.040709	4.77121	0.237667	4.48705	7.25764	0.315542	36.3491	11.411	121.623	41.7799	169.755	32.831	286.283	52.3379	21.1746	107.751	180.052	1231.62	11268	1.96425	0.894013	14.5642	1	1	769.48	9.53664	176.956	582.987	61.1313	2.19712	0.598442	782.476
250	0.023298	11.774	0.200471	3.29176	6.09978	1.05737	27.294	7.88007	82.0361	27.7516	114.989	23.1048	208.415	40.5777	29.0117	131.83	262.168	825.059	11775.7	1.03362	0.505536	17.6452	1	1	554.495	15.2896	124.367	414.838	27.1321	2.0446	0.502845	802.179
251	0.00748201	7.50329	0.0915005	1.40546	2.56396	0.61738	13.5624	4.5318	54.5625	22.149	106.668	24.5576	248.867	54.3938	55.5404	217.411	527.223	724.317	9263.87	1.65286	0.304245	9.04749	1	1	541.481	9.00773	75.838	456.635	50.6937	5.43265	0.412371	736.576
252	0.0756052	9.60088	0.291687	4.23955	5.5847	0.883003	11.2471	1.75671	10.2781	2.14396	6.65513	1.05634	7.69988	1.18027	15.1986	139.382	127.409	67.6247	11759.4	0.326858	0.0792689	13.1895	1	1	62.6929	14.2077	29.7496	18.7356	1.31869	4.1234	1.09397	772.576
253	0.0106115	6.23841	0.082954	1.21545	2.53583	0.879598	14.9534	5.27764	67.3928	28.3514	140.4	33.2122	349.598	78.8641	12.1603	62.6974	120.454	886.729	9622.7	0.845601	0.429824	8.65748	1	1	729.013	7.54742	91.0393	630.426	83.5287	1.96732	0.520509	732.529
254	0.133432	10.3169	0.985568	14.5512	17.1582	1.9256	60.1722	15.5973	153.122	47.4047	183.532	34.0779	296.898	57.714	18.2956	70.6802	113.674	1284.11	7492.35	5.26175	1.30942	6.49486	1	1	893.589	25.9871	247.975	619.627	23.8436	4.01838	0.621782	706.906
255	198.342	498.618	61.2518	257.428	46.2073	2.75414	46.9256	8.50479	73.1167	24.5679	107.097	23.3646	227.01	46.3085	56.9205	137.121	528.114	739.478	11720.6	1.06461	0.57324	6.06489	1	1	1621.5	1015.64	177.509	428.347	0.421751	1.85719	0.259642	700.991
256	2.20049	17.6795	0.744485	5.91955	6.04251	0.842594	27.5809	9.18104	100.81	36.3258	156.472	32.5307	292.439	57.1994	28.9883	111.364	287.202	1080.18	12015.7	1.78739	0.95922	8.11145	1	1	745.967	26.544	144.457	574.966	21.6609	1.86337	0.387756	726.604
257	0.0379955	6.53375	0.0902167	1.40573	2.93766	0.259839	16.7486	5.37715	58.7854	20.6357	82.3644	16.2248	140.643	25.4008	18.6523	49.2942	188.5	600.879	11031.9	3.0882	1.43582	8.98997	1	1	377.445	8.06769	84.1087	285.269	35.3594	2.15082	0.261508	735.988
258	10.1037	40.1045	3.74783	22.5225	14.7042	4.48624	51.732	16.9237	190.124	71.2023	323.375	71.0025	694.381	147.479	61.7371	368.732	693.984	2232.67	9888.64	2.3641	1.22891	9.08864	1	1	1661.89	76.4785	277.97	1307.44	17.0955	1.92373	0.531326	736.994
259	2.97991	23.541	0.942019	5.95994	6.40244	1.1297	34.8388	11.9753	145.083	55.6923	250.824	53.1591	500.473	98.6807	25.6241	355.8	485.589	1676.7	9891.2	2.3166	0.947152	22.2415	1	1	1191.68	33.4229	199.429	958.83	28.6878	2.44586	0.732717	826.95
260	0.0833539	26.8804	0.128507	1.9454	2.94824	1.21167	17.0908	5.42937	67.2174	27.423	135.309	32.258	335.22	77.6245	36.021	430.041	631.357	896.338	10960.3	1.78544	1.00035	4.87177	1	1	730.769	29.0377	93.8974	607.834	20.9326	1.78481	0.681139	682.545
261	0.0344107	23.4706	0.426321	7.35174	11.8279	4.56677	54.3148	16.5776	183.96	66.9631	294.008	62.2703	583.85	120.78	12.1692	220.605	214.629	1969.33	9064.43	1.21106	0.47628	11.0996	1	1	1430.4	31.2831	271.247	1127.87	36.0537	2.54274	1.02784	755.786
262	0.736306	40.2091	0.384324	3.82572	6.19351	1.94974	31.0525	10.6464	124.964	48.6223	221.202	46.9124	437.46	89.5935	26.4279	499.379	484.394	1482.07	9576.87	2.85157	1.05116	12.4994	1	1	1063.75	45.1554	174.806	843.791	18.6864	2.71277	1.03093	767.287
263	1.68004	63.1083	0.612876	4.38488	5.62658	1.81474	31.4513	11.3934	136.024	52.7293	248.096	55.4571	535.949	108.702	40.4397	748.993	838.718	1637.7	11415.3	5.41525	2.0453	4.69195	1	1	1257.03	69.786	186.31	1000.93	14.3429	2.64765	0.893022	679.448
264	7.03905	49.9416	2.02474	9.66286	4.2244	1.10456	19.005	7.18133	97.8056	43.482	227.701	55.7658	586.323	130.36	13.6477	184.495	277.762	1397.33	10698.9	4.62293	1.73733	4.38466	1	1	1241.62	68.6683	129.321	1043.63	15.1982	2.66094	0.664222	673.92
265	51.3219	140.019	16.1987	73.9619	16.505	1.24811	30.173	8.41341	94.9023	38.2501	182.444	41.46	407.816	85.0672	30.6547	323.289	584.072	1187.69	10818.4	2.52856	1.14999	6.88331	1	1	1187.78	281.501	151.242	755.037	2.68218	2.19876	0.55351	711.979
266	0.0139386	5.25898	0.016008	0.417507	1.0877	0.26627	8.19194	2.6793	50.5337	16.5445	117.072	19.8326	349.323	45.4777	145.57	58.0601	106.323	1031.72	9504.37	0.6402	0.354885	4.55828	1	1	616.716	5.70643	62.7589	548.25	96.0758	1.80396	0.546072	677.081
267	0.00991732	29.3604	0.145503	3.54109	8.83509	2.55832	70.3369	24.7147	452.691	139.78	877.802	126.332	1938.47	212.28	432.569	204.853	310.939	7895.46	10455.6	23.6915	6.70571	15.757	1	1	3886.86	33.0569	559.135	3294.66	99.6664	3.53303	0.658821	790.47
268	0.0692158	13.5209	0.040283	0.732077	2.30773	0.466955	21.5788	8.55532	177.456	61.478	446.872	76.1266	1324.34	163.997	16.06	266.427	411.584	3638.61	13146	10.4191	4.56008	3.04676	1	1	2297.54	14.3625	210.365	2072.81	144.322	2.28484	0.64732	645.28
269	0.00772674	10.5098	0.0659934	1.24947	2.60478	0.391695	16.2519	5.73352	107.461	34.7736	240.986	38.5622	638.428	76.0477	140.663	96.3024	113.368	2056.63	9012.16	2.56226	1.0377	2.68767	1	1	1173.07	11.833	132.443	1028.8	86.9428	2.46918	0.849464	635.811
270	0.005916	14.1349	0.0444526	0.756509	1.59385	0.331927	9.17484	2.65539	44.7912	13.6852	92.1792	15.261	254.342	31.0033	77.7584	59.4666	74.9328	797.74	9162.47	0.735091	0.250866	6.086	1	1	479.96	14.9417	58.5472	406.471	27.2037	2.93022	0.793599	701.289
271	0.00351739	9.8508	0.0300041	0.463514	1.0981	0.259715	7.1773	2.15885	37.6078	11.4453	75.4945	11.9671	196.478	23.7994	80.2793	57.1406	83.4996	672.788	12326.3	1.0037	0.396113	9.31346	1	1	377.834	10.3478	48.3017	319.184	30.8455	2.53388	0.684321	739.255
272	8.03607	34.206	2.41329	12.6565	8.20716	0.663094	34.4764	9.8998	159.229	45.6998	285.936	42.9295	666.346	76.3661	16.06	438.502	417.883	2680.4	10662.3	2.02872	0.994392	169.188	1	1	1387.06	57.3119	212.475	1117.28	19.4947	2.04016	1.04934	1105.27
273	0.0113854	14.2623	0.0792966	1.18355	1.65488	0.424169	8.13395	2.06443	32.648	9.09585	56.2423	8.51788	142.661	16.2265	20.923	18.2117	18.1834	564.807	9491.95	0.750448	0.249145	23.7741	1	1	293.205	15.5366	44.9254	232.744	14.9804	3.01209	1.00155	834.293
274	0.891876	20.7433	0.658755	7.26188	9.95128	1.54727	46.1187	12.6003	198.233	53.883	322.622	46.8172	721.704	80.0535	283.318	290.699	168.94	3068.39	9114.71	2.05474	0.713749	134.137	1	1	1523.09	29.5559	268.451	1225.08	41.4496	2.8788	1.72073	1066.49
275	0.00502197	30.7707	0.038337	0.786687	1.97624	0.313824	14.6526	5.05364	90.3534	27.6372	181.68	27.7254	447.875	53.5556	279.834	288.601	251.39	1646.5	12481	2.09412	0.913632	5.91578	1	1	882.423	31.6007	112.35	738.473	23.3689	2.29208	1.14802	698.859
276	0.915159	22.3205	0.2671	1.89284	2.47364	0.292352	13.7562	4.2058	73.4962	22.7038	155.552	25.4069	430.567	51.8438	452.089	408.819	549.142	1409.58	8932.35	2.7157	1.36736	28.7147	1	1	805.693	25.3956	94.2242	686.074	27.0154	1.9861	0.744467	855.643
277	0.00519234	8.45068	0.00538928	0.348784	0.732738	0.137733	4.02952	1.12996	20.4358	6.28014	46.0998	8.18099	153.826	20.1083	58.822	52.2678	73.3637	407.011	10166.2	0.92471	0.435316	11.0565	1	1	269.771	8.81005	26.4657	234.496	26.6168	2.12423	0.712448	755.414
278	0.0522964	17.2191	0.0283601	0.569283	1.60233	0.458605	13.717	5.14062	86.9407	22.6058	127.208	18.2991	299.087	32.5393	232.629	88.5229	315.306	1440.39	10672.1	1.11463	1.1867	6.26669	1	1	625.467	17.869	107.859	499.739	27.9667	0.939266	0.280753	703.809
279	0.0265856	28.93	0.332806	6.00633	8.92116	2.31476	43.1751	12.0969	199.179	58.0231	365.539	54.3939	881.713	104.723	169.233	237.493	125.137	3278.43	8358.3	1.08412	0.511723	11.9371	1	1	1765.37	35.2957	265.687	1464.39	41.4892	2.11858	1.89786	762.799
280	0.0254531	1.82682	0.0649353	1.10605	2.49584	0.496875	15.1119	5.22706	92.4557	28.2946	183.75	29.083	491.289	57.8605	80.5265	77.1497	168.651	1682.74	9048.49	0.861784	0.440789	6.44355	1	1	909.088	3.02326	115.787	790.277	261.399	1.9551	0.457451	706.217
281	0.0158524	1.45034	0.0756313	2.12641	4.52197	0.108904	26.7764	8.56033	147.473	41.9559	262.038	38.5659	615.95	69.3063	98.8553	87.6318	207.211	2418.12	10276.3	0.549639	0.266187	11.4812	1	1	1218.92	3.66824	187.44	1027.82	280.193	2.06486	0.422911	759.033
282	0.00524438	21.852	0.0791162	1.14632	2.21686	0.301117	9.77225	2.97255	48.9734	14.3823	95.1422	15.0588	254.135	30.8246	114.886	141.931	159.718	841.414	11925.8	1.77483	0.829071	12.1654	1	1	496.861	23.0827	64.2362	409.543	17.7424	2.14075	0.888632	764.642
283	0.0309813	7.29938	0.22532	4.402	7.98239	1.26592	49.0938	15.0835	263.514	79.9611	517.384	77.5373	1240.27	144.34	215.698	237.957	399.328	4648.64	9968.55	2.41307	1.26658	7.79943	1	1	2408.39	11.9577	336.94	2059.49	172.231	1.9052	0.595893	723.07
284	0.0352048	8.3651	0.143651	2.14126	4.0441	0.744555	22.2005	6.38293	106.173	31.4909	201.85	30.6997	498.815	60.3442	95.7337	118.999	145.43	1790.13	10696.3	1.36537	0.578955	15.7878	1	1	973.43	10.6852	139.545	823.199	77.0409	2.35833	0.818255	790.67
285	0.0103513	3.77219	0.0464878	0.997601	2.41558	0.0882259	18.1243	6.14131	117.362	37.0478	253.807	40.3633	660.199	78.6777	95.9893	95.6464	210.581	2224.82	13553.1	0.587249	0.422514	7.31628	1	1	1219.05	4.82663	144.131	1070.09	221.706	1.38989	0.454203	717.363
286	0.00492813	18.8515	0.0764723	1.49217	3.47551	0.302012	20.477	5.88499	99.6523	29.4637	197.22	29.4179	482.551	55.3982	75.9745	134.742	92.4384	1701.06	10241.1	1.7941	0.532408	6.79295	1	1	944.268	20.4251	129.792	794.051	38.8763	3.36978	1.45764	710.82
287	0.00535546	12.4782	0.0515924	1.01288	1.90427	0.237765	10.5354	3.24206	55.2961	16.8454	111.737	17.2431	288.15	35.1111	57.2894	93.0713	125.826	972.946	8917.3	1.78762	0.679133	6.54898	1	1	553.85	13.548	71.2156	469.086	34.6239	2.63221	0.739682	707.627
288	2.49807	35.5465	1.43019	10.712	11.557	3.422	52.1772	15.9804	271.589	78.3837	512.355	80.7468	1348.1	160.915	391.722	706.794	725.903	4624.58	10392.2	2.54081	1.06692	25.2079	1	1	2585.41	50.1868	354.725	2180.5	43.4477	2.38144	0.973676	840.828
289	0.0103989	1.01979	0.0437445	0.575924	1.07382	0.185273	7.90409	2.3161	39.3448	11.4736	77.6704	12.5027	220.256	27.8801	12.145	15.9488	37.7112	669.698	8231.55	0.606314	0.267874	22.1345	1	1	402.257	1.64986	50.8241	349.783	212.008	2.26343	0.42292	826.422
290	0.258785	6.14125	0.372423	2.87494	3.50922	0.0834746	18.6045	6.11839	111.728	34.5779	229.834	35.895	610.216	71.8963	145.993	200.257	352.071	2075.16	10157.6	2.0982	1.02329	87.7377	1	1	1132.11	9.6474	140.044	982.419	101.832	2.05044	0.568799	1000.95
291	0.0363321	5.20598	0.0668641	1.22595	2.57081	0.237938	14.9958	4.55338	80.6302	24.4595	159.5	24.8116	396.439	46.6626	31.2935	63.4645	45.8483	1404.03	10827.9	1.7511	0.664695	13.2692	1	1	761.396	6.53512	102.988	651.872	99.7491	2.63444	1.38423	773.172
292	0.0187548	15.1869	0.0806581	0.958041	2.36617	0.260105	13.0199	4.19828	73.6004	21.5778	142.463	22.4846	370.033	43.6401	108.302	186.494	221.512	1304.17	9966.12	2.17461	0.99941	10.3103	1	1	709.887	16.2443	93.4448	600.198	36.9482	2.1759	0.841912	748.771
293	0.0491158	21.9844	0.314746	4.99159	8.84288	1.53056	41.7608	12.0049	194.978	53.8861	329.39	48.9312	773.208	87.7247	169.174	351.138	351.619	3100.82	11933.6	2.03911	1.19229	12.0571	1	1	1579.6	27.3399	259.117	1293.14	47.2987	1.71024	0.998631	763.772
294	1.36875	14.1079	0.716746	4.56858	2.81078	0.141208	11.7797	3.64876	65.0597	20.1247	130.62	20.0314	326.182	38.7364	63.4133	121.668	180.129	1145.65	9453.15	4.13353	1.60005	6.54759	1	1	639.897	20.762	83.4402	535.695	25.8017	2.58338	0.67545	707.609
295	0.00298213	6.53149	0.021152	0.601064	1.25305	0.369987	9.20721	3.16937	59.31	19.1623	133.759	21.6243	385.796	49.9998	36.0735	75.3794	95.6775	1150.33	9398.69	0.826632	0.500189	6.90156	1	1	690.808	7.15669	73.3096	610.341	85.2827	1.65264	0.787849	712.211
296	0.000532325	13.3247	0.0300699	0.638332	2.81862	0.48145	27.3938	13.2225	299.925	108.554	843.537	149.785	2641.39	313.762	65.6145	45.2505	467.285	6085.42	16296.2	80.0828	33.0249	6.74988	1	1	4414.87	13.9937	343.841	4057.03	289.919	2.42492	0.096837	710.263
297	0.0109851	0.842409	0.0471951	0.966051	2.92997	0.0492522	22.6526	8.54169	141.97	36.3639	202.994	27.2475	390.194	40.4583	78.9666	97.1802	388.046	2206.51	11209.3	0.536259	0.382	5.44556	1	1	875.268	1.86664	176.143	697.258	373.536	1.40382	0.250435	691.832
298	0.00438244	9.08726	0.0442594	0.788533	2.15121	0.208499	14.9704	4.94822	88.7412	27.7194	182.383	28.1891	464.044	55.1121	48.4983	106.941	165.574	1573.11	11160.2	2.97893	1.12226	6.95926	1	1	878.392	9.92444	111.02	757.448	76.3215	2.6544	0.645882	712.943
299	0.227501	16.2803	0.40402	6.01576	8.58219	0.585655	42.5267	11.7914	196.088	56.4773	346.325	49.3253	753.591	86.0399	141.891	420.969	289.549	3244.05	10798.7	2.22864	0.98609	42.6466	1	1	1574.26	22.9276	259.574	1291.76	56.3409	2.26008	1.45388	903.149
300	0.00612994	1.7296	0.0832674	2.04403	4.96489	0.154481	35.7304	11.5374	211.389	64.6649	436.991	68.1028	1120.89	132.511	93.5403	177.524	327.602	3592.48	10610.4	1.11454	0.724748	9.66701	1	1	2090.8	3.86303	263.776	1823.16	471.952	1.53783	0.541888	742.721
301	0.0701065	5.25552	0.441887	4.75687	7.11342	2.30996	37.6454	13.0238	228.889	65.7194	420.588	63.8926	1011.61	114.924	119.169	176.122	602.126	3844.18	11655.2	1.01398	0.749332	10.2931	1	1	1976.24	10.5244	288.982	1676.74	159.319	1.35318	0.2925	748.613
302	0.258043	89.3988	0.282847	4.26829	7.36609	2.2408	37.7379	10.2358	170.745	48.3029	306.924	45.2473	735.382	84.3348	94.953	331.408	130.227	2854.71	7012.75	1.69943	0.450174	4.53739	1	1	1542.72	94.208	228.326	1220.19	12.9521	3.77505	2.54485	676.706
303	0.094128	9.78467	0.150957	1.90405	4.34294	0.158266	25.5496	7.8188	137.037	41.3618	263.071	39.1569	625.887	70.4182	82.7082	177.616	316.508	2324.55	12952.4	1.81987	0.95746	16.5384	1	1	1226.74	11.9338	174.907	1039.89	87.1386	1.90072	0.561174	795.446
304	0.0243484	6.89874	0.189727	2.95773	5.719	1.36461	31.2076	9.66819	161.782	46.3159	288.302	42.6768	644.442	72.5882	64.9257	132.801	275.7	2656.49	9593.26	1.80121	0.80154	10.1691	1	1	1314.14	10.0705	209.741	1094.32	108.666	2.24718	0.481688	747.47
305	0.000156875	3.88796	0.0335739	0.720458	2.03431	0.144102	13.8096	4.40737	79.1797	23.8765	155.858	23.4324	382.891	44.0512	49.9166	81.0815	235.571	1338.57	8700.92	1.71731	0.734119	6.16168	1	1	734.326	4.64215	99.5751	630.109	135.736	2.33928	0.344192	702.352
306	0.00287996	12.5193	0.0107385	0.237105	0.506839	0.135085	2.5832	0.804687	13.1884	3.96476	27.4929	5.06679	103.154	15.3777	95.2666	338.353	107.379	258.726	10725.2	0.920904	2.67623	6.25916	1	1	185.044	12.77	17.2182	155.056	12.1422	0.344105	3.15101	703.705
307	0.00879188	2.34309	0.0921107	1.82515	3.8084	0.138262	22.3732	7.34942	117.19	31.2371	185.415	26.79	404.95	45.0163	81.0471	167.737	393.868	1841.72	10882.9	0.784929	0.605057	6.81868	1	1	848.537	4.26915	150.86	693.409	162.423	1.29728	0.42587	711.151
308	0.0126892	8.72882	0.159111	2.44877	4.62498	0.584458	22.936	7.03488	118.141	34.4838	225.074	34.0985	553.5	65.0359	102.582	293.38	202.464	1998.97	8909.87	1.65342	0.73902	12.4909	1	1	1076.86	11.3494	153.321	912.192	80.3736	2.23731	1.44904	767.22
309	3.09968	17.0915	0.979417	4.82031	2.5952	0.196268	12.3307	4.13704	76.0931	23.7378	163.92	26.212	436.917	52.7589	55.2624	128.324	228.615	1375.24	9606.65	2.67226	1.45441	5.92298	1	1	824.889	25.9909	95.3523	703.546	27.0689	1.83735	0.561309	698.963
310	2.65199	18.9638	0.497576	2.98958	4.01465	0.292502	29.8431	11.0015	198.843	55.8671	330.639	46.6375	705.138	78.4545	182.003	341.755	843.137	3433.71	15202.4	7.20765	3.84058	4.67567	1	1	1485.83	25.103	243.995	1216.74	48.4698	1.87671	0.405337	679.163
311	0.0101922	3.70103	0.0551728	1.17221	2.41573	0.145137	14.6704	4.68593	80.9872	24.0335	157.38	24.2355	400.143	47.878	29.0559	52.2919	143.572	1329.87	9036.53	1.36883	0.577091	10.0412	1	1	761.513	4.93861	102.904	653.671	132.359	2.37195	0.364222	746.278
312	0.025152	10.1606	0.230383	4.28522	7.49043	0.475009	38.7151	10.9864	177.719	49.9478	307.483	45.1498	700.731	80.5997	56.1132	186.434	144.085	2814.36	12611.6	2.76465	1.14387	5.21751	1	1	1434	14.7013	235.386	1183.91	80.5308	2.41693	1.29392	688.243
313	0.00894903	2.89278	0.0390758	0.630949	1.75355	0.101618	11.1023	3.74676	66.6496	20.1975	129.024	20.0457	327.043	37.7327	22.0084	49.4151	114.58	1126.7	9304.41	0.847093	0.401068	4.43286	1	1	620.969	3.57176	83.3538	534.043	149.518	2.11209	0.431273	674.808
314	0.0139085	12.5049	0.0508089	1.29945	2.97129	0.321387	24.7554	8.81062	176.334	59.027	417.519	67.1039	1096.25	128.898	91.966	231.821	488.947	3497.28	11546.9	2.14706	1.20194	8.97561	1	1	1995.86	13.8691	213.193	1768.8	127.535	1.78632	0.474123	735.841
315	0.00774073	4.65154	0.0826527	1.64127	3.96562	0.385358	24.3893	7.41346	126.134	36.5432	228.679	34.7229	545.972	62.3463	42.3202	87.242	187.819	2040.39	9433.28	2.03808	0.779639	13.2458	1	1	1076.93	6.3832	162.288	908.264	142.29	2.61413	0.464501	772.997
316	0.0406823	6.69043	0.0908421	1.40463	2.90219	0.408614	17.291	6.35474	124.876	40.8767	305.425	55.1464	1012.3	123.54	59.3897	88.1057	364.771	2521.36	8421.22	7.51494	3.76411	7.4027	1	1	1697.35	8.22658	151.833	1537.29	186.868	1.99647	0.241537	718.406
317	0.0187968	5.34532	0.0380661	0.188636	0.203657	0.203729	1.06331	0.54568	6.02026	1.81612	10.0221	1.66044	21.5636	2.76079	28.241	88.0643	171.886	109.241	9971.63	1.3285	0.396654	4.06127	1	1	51.4504	5.59082	8.03664	37.823	6.76519	3.34927	0.512343	667.745
318	0.00442093	5.51829	0.0697677	1.36422	2.81504	0.253153	13.6946	3.42217	52.4693	13.6784	82.0713	11.8581	186.533	21.5182	53.5396	210.301	306.267	816.654	8844.06	0.930077	0.285282	7.16122	1	1	395.27	6.9567	72.6542	315.659	45.3748	3.2602	0.686657	715.465
319	0.00103962	8.79763	0.0590297	1.21893	2.31316	0.432341	12.0137	2.82009	37.8992	9.52228	55.5902	8.24758	132.893	15.5791	65.3756	159.635	374.17	580.712	11550.9	0.938647	0.468724	8.16167	1	1	287.387	10.0766	55.4785	221.832	22.0145	2.00256	0.426636	727.162
320	11.8184	45.7751	3.5667	16.8216	4.8643	0.204064	13.9419	3.92689	64.9157	18.677	119.452	18.3374	292.943	34.75	40.8899	179.954	137.086	1042.15	10154.5	3.35023	1.38855	9.61507	1	1	649.994	77.9818	87.8529	484.159	6.20862	2.41275	1.31271	742.218
321	0.0126521	13.752	0.0520978	0.765644	1.00524	0.371713	4.07673	0.907137	11.4956	2.75598	15.0972	2.11871	34.9695	4.61839	28.7941	121.521	123.464	170.3	9147.1	1.07972	0.623056	4.52438	1	1	91.9987	14.5824	17.8565	59.5598	4.08436	1.73294	0.984268	676.472
322	0.0851475	28.9281	0.0663931	1.16688	2.81976	0.340848	17.4932	5.79016	106.344	34.0883	242.858	40.9728	710.364	89.421	31.7487	104.374	220.521	2022.41	14326.8	2.83142	1.18402	51.3552	1	1	1280.74	30.2466	132.788	1117.7	36.9531	2.39137	0.473307	926.875
323	0.00459227	6.32374	0.0229525	0.440597	1.06588	0.280645	6.37752	1.86133	31.491	9.24626	61.4198	9.9196	172.732	21.5852	12.3722	50.2694	70.5681	540.984	8782.85	0.498704	0.204084	5.5057	1	1	322.771	6.79188	41.0764	274.903	40.4752	2.44362	0.712353	692.758
324	0.0286833	5.02059	0.0420591	1.3116	5.08202	0.222337	39.5564	12.8348	221.963	66.3761	426.116	64.6753	1043.18	122.64	30.811	95.1218	212.101	3888.09	10553.4	3.7905	1.19042	11.7897	1	1	2009.05	6.40293	279.659	1722.99	269.094	3.18416	0.448475	761.595
325	0.000731606	17.2065	0.0824048	1.78583	3.24762	0.183507	17.7866	5.17086	84.8321	24.5583	155.392	23.3351	376.609	44.305	50.7756	241.092	206.291	1391.81	13730.5	3.66501	1.40935	13.7293	1	1	754.496	19.0755	111.221	624.199	32.7226	2.60049	1.1687	776.558
326	0.00911151	9.06983	0.0823998	1.59528	2.21359	0.493266	10.6859	2.95895	44.993	11.9272	74.0219	10.9845	180.44	21.1943	16.058	68.4997	82.0248	683.021	11309.3	1.09876	0.474194	29.6718	1	1	370.669	10.7566	61.3447	298.568	27.7567	2.31711	0.835109	859.434
327	0.0107689	7.03524	0.114187	2.19555	4.76824	0.673297	24.8123	6.44541	104.575	28.8235	178.371	25.8617	412.195	48.9832	38.4817	190.686	144.269	1639.01	9579.12	0.579473	0.223857	7.39418	1	1	844.865	9.35574	141.274	694.235	74.2042	2.58858	1.32174	718.303
328	0.00470156	20.0255	0.0543898	0.941258	2.24447	0.182463	12.8532	4.20615	75.3874	23.2006	155.919	24.5527	405.757	48.2334	65.93	352.462	263.962	1357.82	10370	3.26948	1.5102	8.75058	1	1	773.562	21.0258	94.8737	657.662	31.2788	2.16493	1.33528	733.508
329	0.0114204	13.8036	0.0886095	1.51588	2.98326	0.404931	17.6778	5.57869	97.1495	29.8249	197.832	31.2023	510.011	59.1652	26.6371	139.231	108.184	1708.6	11736.9	2.22537	0.974715	19.3073	1	1	967.249	15.4195	123.794	828.035	53.7005	2.2831	1.28699	811.678
330	0.0267273	17.7397	0.114776	2.38369	4.48531	0.274658	25.9232	7.71067	130.499	36.9273	234.08	35.4623	569.296	65.7509	45.2254	264.24	174.792	2023.84	12302.6	2.82016	1.16417	10.8257	1	1	1130.67	20.2649	168.893	941.517	46.4605	2.42246	1.51174	753.399
331	0.00604796	1.80984	0.0172343	0.532256	1.93371	0.0387572	11.9621	3.09605	42.8492	9.42518	46.7015	5.77131	72.8522	7.32246	26.5002	137.51	111.025	572.424	12285.8	0.833926	0.317475	8.7658	1	1	204.318	2.36537	59.8797	142.073	60.0635	2.62674	1.23855	733.667
332	0.0151534	14.7748	0.115646	1.89569	4.19978	0.354238	21.2976	6.25084	107.643	30.9142	197.519	30.2894	489.326	55.5811	36.3557	208.95	157.233	1743.55	9655.3	3.96025	1.59185	13.3619	1	1	960.176	16.8013	139.745	803.63	47.8314	2.48782	1.32891	773.862
333	0.0540903	10.6189	0.296963	5.01586	8.88311	0.56592	40.4838	10.5848	153.842	39.5629	221.894	30.6059	448.145	48.2114	71.6338	422.033	122.997	2222.78	10722.1	1.69872	0.685184	10.8668	1	1	1018.77	15.9859	214.36	788.42	49.3198	2.47922	3.43124	753.761
334	0.107511	14.8382	0.25908	2.99549	3.60186	1.3633	10.1545	2.28372	31.5038	7.41037	44.2261	6.70531	111.996	11.9091	51.4721	288.62	170.915	454.992	6693.63	0.736374	0.35237	45.9957	1	1	249.354	18.2003	48.9072	182.247	10.0134	2.08977	1.68867	912.688
335	0.975723	7.38908	0.744654	8.05149	9.68421	1.44109	38.7028	9.5827	143.579	37.2989	216.477	30.634	476.148	54.3625	13.0239	78.7218	50.3276	2060.36	7475.75	1.64841	0.555135	17.8762	1	1	1035.07	17.1609	202.99	814.92	47.4869	2.96939	1.56419	803.541
336	0.00304002	18.7615	0.0732941	1.36585	2.84387	0.247959	14.7307	4.17963	66.7426	18.5892	115.54	17.7298	284.003	32.7551	29.6774	155.875	141.33	1051.6	9776.25	2.76347	1.17267	11.3771	1	1	577.565	20.2037	88.7447	468.617	23.1946	2.35656	1.10292	758.156
337	0.00240568	26.9872	0.0588275	1.36599	2.59279	0.499582	15.0102	4.65756	82.8337	25.2506	169.684	26.7608	452.091	53.3442	37.9455	182.026	149.595	1492.12	10032.7	2.0551	0.877344	18.367	1	1	861.139	28.4144	105.594	727.131	25.5902	2.34241	1.21679	806.389
338	0.0844028	6.48432	0.0985153	1.88126	5.45783	1.32636	36.9214	11.8626	205.925	61.2189	393.01	60.2868	984.646	110.38	38.9664	245.555	486.399	3606.06	8259.22	2.39819	0.668397	33.9599	1	1	1879.58	8.54849	261.493	1609.54	188.284	3.58798	0.504843	875.316
339	0.104289	5.56484	0.506275	7.73254	11.5645	1.69714	54.5627	14.8785	233.06	63.2352	375.866	53.2589	818.71	92.3466	42.9042	119.17	123.513	3504.17	10733.5	1.35531	0.661542	6.37154	1	1	1733.09	13.9079	315.763	1403.42	100.908	2.04872	0.964837	705.243
340	3.25343	34.125	1.23867	9.51365	11.6105	2.969	69.1783	21.866	331.094	118.27	734.688	130.288	2131.46	287.951	45.9198	726.722	450.9	6790.48	9138.54	1.20947	0.29289	21.0123	1	1	3887.51	48.1307	436.717	3402.66	70.6962	4.12943	1.61171	820.761
341	0.0133758	21.7769	0.12496	2.21918	4.84626	1.19114	28.2783	9.21918	143.376	52.165	345.155	66.6142	1156.78	163.991	30.0428	375.529	389.753	3187.37	10395.9	1.32612	0.589793	6.3316	1	1	1995.75	24.1344	186.911	1784.7	73.9485	2.24846	0.963506	704.699
342	6.76591	40.3105	2.13348	12.6974	11.8609	3.00559	71.6346	23.3914	354.297	123.773	759.847	133.837	2202.53	296.969	40.3118	637.953	457.696	7093.2	9211.82	1.10021	0.291051	8.55328	1	1	4043.05	61.9072	464.189	3516.96	56.8101	3.78012	1.39384	731.422
343	0.192476	20.2375	0.494699	6.9157	10.7923	2.64363	50.1395	14.8428	213.513	72.7151	450.583	82.0694	1376.3	182.95	22.2573	297.657	275.687	4292.49	9752.57	0.625223	0.23244	4.89397	1	1	2484.39	27.8404	291.931	2164.62	77.751	2.68982	1.07969	682.92
344	1.39866	26.2694	0.703081	7.54865	11.9734	3.0546	62.0838	18.3184	261.865	88.9209	542.572	97.2755	1602.54	214.542	36.6844	388.173	337.717	5216.18	9577.72	0.678056	0.226284	8.72054	1	1	2939.06	35.9198	357.295	2545.85	70.876	2.99648	1.1494	733.193
345	0.030015	20.0474	0.218209	3.72735	7.40814	1.87387	39.6022	12.005	175.611	61.5921	390.082	71.4811	1202.84	167.406	23.2443	361.97	279.02	3792.46	8947.8	0.701054	0.20053	45.128	1	1	2153.92	24.0229	236.5	1893.4	78.8164	3.496	1.29729	910.27
346	0.0225878	26.3096	0.320515	5.46717	11.9024	3.2544	74.2897	22.7075	335.321	118.305	734.299	133.054	2188.19	285.862	40.5482	622.175	425.303	7002.12	9256.13	1.09601	0.240465	5.32062	1	1	3939.31	32.1199	447.475	3459.71	107.712	4.5579	1.4629	689.881
347	13.0618	51.6776	2.88441	12.7892	6.51222	1.44182	32.4492	10.642	168.135	63.0586	416.347	77.8349	1330.66	184.667	33.0031	507.699	369.026	3768.13	9029.65	1.06545	0.265612	9.10741	1	1	2372.16	80.413	219.18	2072.57	25.774	4.01129	1.37578	737.185
348	13.0006	51.2264	3.47769	18.2403	9.21214	1.83038	37.7125	11.7466	180.973	66.0843	433.517	80.1225	1373.56	193.753	28.7143	397.694	322.488	4118.18	9411.4	0.998785	0.253606	21.58	1	1	2474.46	85.945	241.475	2147.04	24.9815	3.93834	1.2332	823.655
349	69.3441	180.184	18.158	76.4996	21.4573	3.62382	59.6899	17.0728	246.225	85.155	525.073	95.1012	1571.49	212.125	32.7788	502.101	360.627	4967.1	9390.89	0.815952	0.233794	9.32321	1	1	3181.2	344.185	348.069	2488.95	7.23141	3.49005	1.3923	739.352
350	0.0130717	22.3193	0.0789727	1.55164	3.54508	0.996219	23.2401	7.81519	127.467	48.5225	325.788	62.9967	1141.15	158.498	32.2402	348.499	475.068	2950.11	10576.6	1.73326	1.12781	5.25294	1	1	1923.98	23.963	163.063	1736.95	72.4848	1.53683	0.733578	688.809
351	1.08362	18.9168	0.44003	4.43358	6.76292	1.57776	34.2362	10.5677	154.957	54.7836	349.139	64.3634	1088.39	152.09	17.5415	242.729	225.458	3317.26	9665.46	0.593343	0.207489	4.98583	1	1	1941.74	24.874	208.102	1708.77	68.6968	2.85964	1.0766	684.46
352	0.00645562	19.221	0.0645958	1.59936	3.83213	0.99349	22.973	7.55665	118.112	42.442	270.824	50.4353	861.035	122.08	21.6998	334.67	246.077	2566.96	9506.28	0.712307	0.193196	5.57662	1	1	1521.18	20.8915	153.468	1346.82	64.4673	3.68697	1.36002	693.84
353	0.0589146	19.0583	0.130715	2.31596	5.18517	1.1613	29.8052	9.20345	139.838	51.0696	329.083	62.7843	1083.5	147.867	26.0691	292.964	323.081	3094.37	10023.1	1.09087	0.446051	44.1014	1	1	1881.06	21.5639	185.193	1674.3	77.6438	2.44563	0.906783	907.362
354	0.47533	22.195	0.398831	4.70027	8.98714	2.17972	49.0619	14.6593	209.332	72.792	458.671	83.4185	1379.11	186.092	23.3038	343.455	280.117	4267.38	9302.03	0.690022	0.20472	16.5904	1	1	2492.07	27.7694	284.22	2180.08	78.5065	3.37057	1.22611	795.77
355	0.0786182	15.9762	0.0651869	1.1023	2.5745	0.650834	15.3946	5.21023	82.1533	30.688	204.572	40.4309	714.203	101.188	19.475	227.018	227.732	1930.17	10705	0.616452	0.19819	9.62082	1	1	1214.29	17.2223	105.983	1091.08	63.3529	3.1104	0.996866	742.274
356	0.0536433	22.8696	0.15388	3.11565	6.50165	1.72258	37.6551	11.9461	182.128	65.2226	420.946	78.2527	1334.59	186.253	25.8276	385.299	309.778	4010.99	9597.41	0.876313	0.240148	5.92459	1	1	2351.41	26.1928	239.953	2085.27	79.6123	3.64906	1.24379	698.986
357	0.869473	23.6934	0.38137	3.25486	4.69819	1.27752	28.1667	9.31916	141.837	51.6436	336.721	64.209	1109.56	151.761	28.9363	406.395	320.737	3119.14	9363.24	0.837715	0.225438	6.6883	1	1	1927.4	28.1991	185.298	1713.9	60.7784	3.71594	1.26707	709.462
358	0.363562	22.955	0.261777	3.7241	8.15125	1.97364	45.6628	14.0544	212.12	73.4511	465.531	85.3469	1447.67	197.103	29.0684	413.222	357.678	4442.04	9795.4	0.914344	0.360226	6.05491	1	1	2578.37	27.3045	281.962	2269.1	83.1038	2.53825	1.15529	700.85
359	0.220369	32.5126	0.294645	4.56088	10.3143	2.14957	55.5279	17.6898	266.923	92.5402	590.891	112.453	1867.51	249.451	47.0539	604.114	534.498	5640.74	10755.3	1.19768	0.364899	4.26758	1	1	3303.04	37.5885	352.605	2912.84	77.493	3.28222	1.13025	671.73
360	0.00520105	13.9762	0.0419423	1.03506	2.85927	0.712484	19.216	6.72123	107.461	41.5019	274.76	54.6233	957.745	136.282	11.6395	134.169	216.652	2519.56	11937.8	0.493064	0.201848	3.26182	1	1	1616.94	15.0584	136.97	1464.91	97.2823	2.44276	0.619284	650.514
361	0.0212824	27.3028	0.331025	5.43489	11.0769	3.14471	71.2212	23.7598	361.086	126.919	798.297	143.636	2366.58	319.45	37.6322	567.124	481.568	7345.76	9828.27	0.972761	0.284915	4.81777	1	1	4258.26	33.09	470.289	3754.88	113.475	3.41422	1.17766	681.625
362	0.000997974	9.09277	0.0339241	0.818586	2.11254	0.621915	15.343	5.24259	84.0457	30.554	203.726	40.1805	708.689	100.072	7.99712	85.1537	139.669	1911.85	10760.6	0.416358	0.118678	3.42427	1	1	1200.53	9.94628	107.366	1083.22	108.907	3.50829	0.609682	654.28
363	0.0381721	30.3389	0.371063	6.11288	12.7929	2.95533	75.5334	25.3137	388.927	140.769	880.633	159.996	2652.07	351.989	49.5667	731.347	600.432	8122.49	10907.5	1.17415	0.343402	3.97539	1	1	4727.84	36.8611	505.523	4185.45	113.547	3.41917	1.21803	666.037
364	0.00165869	15.3488	0.0571571	0.980505	2.88995	0.775176	18.9943	6.62672	109.079	42.0498	280.983	54.9208	968.991	138.813	11.5219	131.491	202.244	2574.44	10930	0.742438	0.21124	4.00217	1	1	1640.51	16.3881	138.365	1485.76	90.6608	3.51467	0.650159	666.573
365	0.0325883	22.904	0.312848	5.20611	12.041	3.14618	67.1208	20.7845	302.941	104.331	639.083	115.925	1896.05	256.659	28.9961	425.818	359.847	5977.46	9474.06	0.695622	0.220735	4.65984	1	1	3446.54	28.4555	406.033	3012.05	105.851	3.15139	1.18333	678.884
366	0.0251419	26.4826	0.319487	5.42264	10.3566	2.74089	62.6503	21.7998	365.734	139.469	896.187	166.157	2777.49	383.598	50.0211	718.045	609.325	8204.65	10276.4	1.20922	0.359741	4.11297	1	1	4858.43	32.2499	463.282	4362.9	135.284	3.36136	1.17843	668.759
367	0.2114	73.9566	0.36884	6.79213	17.0502	4.57115	96.5725	28.3388	405.954	136.21	840.818	150.197	2438.34	327.204	129.87	2307.33	972.211	8075.55	9153.47	2.27964	0.552725	7.05861	1	1	4526.59	81.3289	552.487	3892.77	47.8645	4.12436	2.37328	714.191
368	0.00119137	13.5625	0.0356112	0.766184	2.79385	0.746631	18.4955	6.85833	104.912	38.9773	259.623	52.2018	905.891	129.469	12.3332	133.843	214.22	2365.75	11012	0.477364	0.174557	3.55603	1	1	1534.33	14.3655	133.806	1386.16	96.4924	2.73472	0.624791	657.226
369	0.00662673	16.8691	0.10378	1.82422	5.09221	1.32589	30.3393	9.88356	154.749	55.6963	357.026	67.3696	1139.81	158.752	15.5588	192.792	233.852	3304.39	10120.6	0.591855	0.202445	3.8964	1	1	1998.85	18.8037	201.39	1778.66	94.5909	2.92353	0.824418	664.438
370	0.00480997	17.1477	0.03534	1.12009	3.97919	0.860031	25.3752	8.36418	134.009	50.2209	335.463	67.0541	1164.63	160.053	16.1059	190.179	263.004	2953.93	11386.1	0.6513	0.243621	3.43274	1	1	1968.31	18.3079	172.588	1777.42	97.0847	2.67341	0.723102	654.472
371	0.0174245	21.4455	0.238641	4.62843	11.0576	2.83922	62.8864	18.4584	265.544	89.2677	546.285	97.4662	1603.42	218.408	25.133	385.467	296.38	5332.41	9134.26	0.66535	0.160884	3.62001	1	1	2941.96	26.33	360.786	2554.85	97.0318	4.1356	1.30058	658.625
372	0.00504555	31.2447	0.0650257	1.80054	3.88282	1.04703	28.1294	9.71712	164.894	61.7607	411.886	80.3076	1381.61	197.935	25.0474	272.2	372.071	3985.13	10922.8	1.55019	0.468378	4.769	1	1	2374.28	33.1153	207.67	2133.49	64.4262	3.30969	0.731581	680.786
373	0.0304412	69.4202	0.383577	7.4813	17.2899	4.48522	110.558	33.8439	496.409	168.898	1031	185.832	439.16	396.091	100.01	1731.57	927.779	9786.4	10061.8	2.33781	0.602583	6.0091	1	1	2960.88	77.3155	662.587	2220.98	28.7262	3.87965	1.86637	700.198
374	0.00825648	14.6579	0.0433111	1.00714	3.16487	0.867067	20.8238	7.40954	116.347	44.3511	278.87	56.2425	978.803	141.891	13.6658	153.234	234.351	2655.7	10881.8	0.512401	0.245847	3.5277	1	1	1664.49	15.7166	148.612	1500.16	95.4503	2.08422	0.653866	656.601
375	0.00179211	18.2006	0.0577357	1.00071	3.37418	0.833362	23.5912	8.06893	131.421	48.6391	326.137	64.3397	1102.55	156.363	15.7824	191.352	267.328	2955.53	10900.3	0.766606	0.237749	4.40183	1	1	1884.58	19.2609	167.289	1698.03	88.1596	3.22443	0.715796	674.238
376	0.00651537	22.8793	0.118334	2.28542	5.46654	1.42434	34.7083	11.3042	184.27	67.5619	450.589	84.8202	1443.2	204.339	22.8913	298.88	330.859	4272.9	11297.6	0.905134	0.26397	4.22658	1	1	2512.97	25.2896	237.174	2250.51	88.9897	3.42892	0.903348	670.951
377	0.0782668	28.2978	0.302491	5.42755	11.6072	3.26094	73.5004	22.2059	315.724	107.355	672.904	119.434	1969.26	264.376	36.1338	588.687	409.215	6154.33	9882.97	0.849783	0.32269	5.75841	1	1	3593.73	34.1061	426.298	3133.33	91.8699	2.63343	1.43858	696.56
378	0.235444	32.7389	0.193011	3.66559	9.15784	2.27401	51.7814	17.0465	266.096	95.1655	616.74	114.831	1906.64	264.982	31.1206	434.913	428.966	5565.55	10459.2	1.40209	0.354277	5.05897	1	1	3381.55	36.833	346.355	2998.36	81.4042	3.95761	1.01386	685.67
379	0.00181674	49.3698	0.104495	2.28866	5.66274	1.39065	40.1383	14.3299	227.693	81.8656	530.903	99.4854	1643.22	222.195	36.2136	543.363	477.607	4901.17	11811.9	2.68955	0.37387	5.63662	1	1	2918.64	51.7648	289.215	2577.66	49.7957	7.19381	1.13768	694.746
380	0.0209735	26.4692	0.201094	3.89561	8.70256	2.19686	51.2014	16.4056	250.046	88.7325	572.111	106.994	1841.92	245.379	40.445	520.016	493.829	5378.36	11309.1	1.04266	0.337686	4.50346	1	1	3214.27	30.5868	328.553	2855.13	93.3451	3.08766	1.05303	676.094
381	0.0762219	28.0111	0.335383	5.68154	13.6233	4.19889	83.2017	24.1132	353.196	119.482	729.341	131.681	2210.37	291.807	44.7492	610.038	496.529	6775.41	9666.71	0.852896	0.286591	9.51598	1	1	3995.12	34.1042	478.333	3482.68	102.119	2.976	1.22861	741.253
382	0.0331645	25.7617	0.269831	4.92071	11.0118	3.10994	61.0167	18.3781	275.063	93.6756	580.999	107.236	1867.49	253.17	39.0584	608.682	435.513	5482.93	9932.84	0.829341	0.293015	8.52792	1	1	3302.13	30.9854	368.58	2902.57	93.6755	2.83037	1.39762	731.151
383	0.0150099	45.0585	0.162262	3.36073	7.85605	2.15537	51.6372	17.1721	268.935	96.3265	620.597	114.651	1956.83	262.67	59.0191	848.339	642.135	5745.47	10519.8	1.72354	0.404504	5.64468	1	1	3447.43	48.5965	347.756	3051.08	62.7838	4.26087	1.32112	694.867
384	0.0132207	46.9085	0.129152	2.97452	8.2581	2.57277	55.3629	17.5885	263.967	92.9599	597.785	110.105	1839.5	247.344	66.8847	961.816	637.015	5649.54	9704.97	1.57573	0.368083	5.88991	1	1	3285.47	50.0254	347.749	2887.7	57.7246	4.2809	1.50988	698.485
385	0.0343182	28.177	0.373018	6.34915	14.2821	4.36235	94.575	30.0868	470.11	164.892	1041.31	185.999	439.16	420.274	64.7589	950.589	639.392	9351.71	8661.41	1.2669	0.347545	4.70491	1	1	2899.99	34.9335	613.416	2251.64	64.4551	3.64528	1.48671	679.674
386	0.0252918	54.0495	0.162019	2.95439	7.7479	1.70988	43.8881	14.4598	220.368	80.5805	518.089	97.7396	1672.61	213.724	104.328	1664.51	931.302	4955.08	10848.4	3.17358	1.11984	5.31335	1	1	2928.11	57.1912	288.173	2582.75	45.1598	2.83396	1.78729	689.767
387	0.643149	69.0171	0.35739	3.23592	5.82425	0.945622	36.1083	12.4044	194.204	65.592	400.059	68.2779	1078.99	135.362	25.2818	527.911	729.585	3858.19	9903.88	10.8821	2.75463	6.49984	1	1	2071.02	73.2535	249.486	1748.28	23.8662	3.95046	0.723577	706.972
388	0.00858404	25.6141	0.0785999	1.64181	4.67232	1.27138	29.9135	10.315	169.479	63.7256	425.079	81.7214	1437.59	198.996	29.6011	349.711	374.835	3842.31	9881.18	0.995079	0.28895	4.74864	1	1	2450.1	27.3431	215.651	2207.11	80.719	3.44378	0.932972	680.434
389	0.00395779	33.7086	0.170299	3.16254	7.01072	2.24349	44.8187	14.4059	222.695	78.5616	507.071	94.6741	1613.43	220.262	55.4772	840.63	564.704	4638.88	10048.6	1.04151	0.349874	4.81331	1	1	2842.22	37.0454	291.174	2514	67.8626	2.97681	1.48862	681.548
390	0.0526549	30.0122	0.364611	6.26892	13.6622	4.03022	85.6054	26.6207	398.686	137.358	856.798	155.612	2615.5	347.077	59.9973	811.74	694.308	7903.52	9375.96	1.19896	0.370725	11.7768	1	1	4677.64	36.6984	528.605	4112.34	112.058	3.23409	1.16914	761.489
391	0.246957	22.0742	0.329418	4.68829	9.0984	2.41423	45.4872	13.5927	189.967	65.9766	411.919	77.2555	1307.14	170.468	30.2533	410.984	340.913	3894.7	9393.75	0.637586	0.181496	183.494	1	1	2320.66	27.3388	260.559	2032.76	74.3544	3.51294	1.20554	1119.36
392	0.00883057	80.0364	0.161537	3.35894	9.93561	2.58636	68.1132	22.4548	349.719	126.388	829.791	155.169	2587.87	335.042	97.9608	1480.72	997.539	7797.42	10727.5	3.23992	0.577514	7.24018	1	1	4570.64	83.5657	452.809	4034.26	48.2765	5.61012	1.48437	716.436
393	0.0155224	23.3853	0.0978495	1.72824	4.69806	1.35991	29.8834	9.87872	156.527	55.9081	365.789	69.844	1219.25	164.276	31.0102	379.174	390.551	3377.44	9842.48	0.951653	0.312921	4.75105	1	1	2102.64	25.2269	202.347	1875.07	74.3279	3.04119	0.97087	680.476
394	0.00943488	14.2055	0.177411	2.70893	5.72366	1.62864	33.6295	10.63	162.176	56.1504	358.66	67.5764	1168.58	154.798	21.3374	245.713	261.945	3415.51	9174.46	0.404747	0.171815	4.44867	1	1	2036.66	17.1013	213.787	1805.77	105.593	2.35571	0.938032	675.098
395	0.0424084	18.894	0.253478	4.83007	9.39682	2.58136	51.0457	17.48	266.889	97.3071	623.367	113.971	1970.71	267.284	34.367	452.53	426.831	5682.47	9849.43	0.571104	0.22526	5.83712	1	1	3444.06	24.02	347.393	3072.64	127.92	2.53531	1.06021	697.716
396	0.841283	27.4921	0.726878	7.76549	12.3382	3.67239	68.0785	20.8524	302.857	102.761	638.827	116.37	1980.15	263.543	46.3791	588.514	564.273	6023.53	9812.08	0.959596	0.365552	51.0367	1	1	3546.27	36.8257	407.798	3101.65	84.225	2.62506	1.04296	926.066
397	0.234915	38.3486	0.542739	7.34033	15.2673	4.03724	83.3576	24.9161	362.142	121.871	758.831	136.412	2302.45	294.205	56.746	783.522	622.856	7025.8	10211.1	1.41888	0.619808	6.88936	1	1	4149.96	46.4666	489.721	3613.77	77.7714	2.28923	1.25795	712.056
398	0.136821	46.9995	0.16502	2.98101	6.55665	1.92175	41.7904	15.2399	250.32	93.4648	631.629	119.691	2083.85	276.205	52.3181	646.859	626.512	5691.51	9833.07	2.01632	0.413283	8.17621	1	1	3570.96	50.2824	315.829	3204.84	63.7369	4.87879	1.03248	727.323
399	1.20814	53.851	0.847074	7.35665	9.01722	2.52007	53.1747	16.7772	250.599	85.9988	544.867	102.593	1750.12	232.871	95.3409	1455.45	869.207	5134.45	10811.4	1.93548	0.546	21.7184	1	1	3111.8	63.2629	332.088	2716.45	42.9391	3.54483	1.67446	824.35
400	0.0121773	23.9751	0.0883652	1.84182	5.25907	1.48341	34.3211	11.0942	178.126	65.8515	435.34	79.9133	1360.08	184.77	24.2741	302.555	312.255	3946.99	9158.29	0.925501	0.212542	4.37217	1	1	2382.15	25.9174	230.284	2125.95	82.0279	4.35444	0.968936	673.689
401	0.169128	30.3411	0.427845	6.98714	14.605	4.13795	89.8139	27.9131	410.591	141.309	890.554	160.088	2648.16	352.131	52.8564	732.597	560.546	8350.37	9446.88	1.03305	0.303138	6.04634	1	1	4777.23	37.9252	547.06	4192.25	110.54	3.40784	1.30693	700.728
402	0.0140202	29.8731	0.12308	2.26879	6.7117	1.93459	40.4953	13.34	202.105	70.1741	448.19	82.3355	1388.08	191.14	36.9889	439.908	425.955	4181.43	10242	0.982859	0.370024	4.78847	1	1	2476.79	32.279	264.587	2179.92	67.5337	2.6562	1.03276	681.122
403	0.126485	35.5956	0.189858	3.47935	8.83317	2.60703	53.5622	16.4332	244.08	83.8272	527.704	96.6894	1630.4	220.21	43.8632	638.312	449.344	4982.94	9056.02	1.21124	0.316017	12.6897	1	1	2923.73	39.3913	325.515	2558.83	64.9593	3.83282	1.42054	768.769
404	21.1159	73.8693	6.49857	33.3857	15.4518	3.45077	60.9588	17.1776	244.346	82.6	499.534	91.3937	1525.9	198.707	35.6091	466.909	388.509	4777.03	9328.69	0.769298	0.265208	11.6292	1	1	2874.39	134.869	341.385	2398.14	17.7812	2.90074	1.2018	760.269
405	3.08569	38.0905	1.69885	10.3769	11.2972	2.80254	56.0214	16.6637	249.716	83.6139	520.446	93.6958	1598.63	210.348	40.4991	565.113	418.501	5047.22	9345.07	0.852082	0.238537	5.89086	1	1	2896.48	53.2519	336.501	2506.73	47.0731	3.57211	1.35033	698.498
406	0.356186	43.5343	0.286867	3.88325	7.79672	2.29097	50.5464	16.7979	261.928	91.907	581.909	107.063	1830.56	240.477	55.1973	695.633	544.418	5632.51	8851.35	1.50979	0.352237	87.6077	1	1	3239.33	48.0606	339.36	2851.91	59.3399	4.28628	1.27775	1000.73
407	0.24747	14.5912	0.132555	1.68663	4.11537	1.04497	22.9884	7.35767	113.108	39.6153	251.848	48.5257	849.12	112.773	25.0219	221.078	390.027	2434.23	12061	0.654499	0.41315	7.63947	1	1	1467.15	16.6579	148.614	1301.88	78.1542	1.58417	0.566827	721.214
408	0.028038	37.5312	0.113408	2.21586	6.26504	1.85019	38.421	12.4517	191.345	67.5949	444.367	81.9809	1391.11	189.659	52.641	713.193	509.219	4145.37	10212.4	1.37739	0.335712	58.0459	1	1	2464.93	39.8885	250.333	2174.71	54.5197	4.10289	1.40056	943.043
409	0.141988	41.1888	0.203575	3.19792	7.33449	1.92214	43.6028	14.4424	219.995	77.4881	495.92	91.6572	1585.03	209.579	59.2792	776.081	603.384	4688.03	10696.9	1.51408	0.439757	4.7519	1	1	2791.71	44.7323	287.297	2459.68	54.9866	3.44299	1.28621	680.491
410	0.0363572	45.5573	0.126215	2.09194	5.88351	1.51885	38.4686	12.9049	203.094	72.4148	470.646	86.5317	1511.07	200.535	78.103	1127.01	748.285	4380.43	10662.1	1.80167	0.482691	6.30233	1	1	2650.88	47.8118	261.87	2341.2	48.9669	3.73255	1.50613	704.298
411	14.1109	72.1642	3.84765	23.1192	21.6233	6.28216	115.719	34.4304	494.68	165.027	1008.24	179.578	2904.11	379.81	83.022	1059.8	698.399	9706.13	9322.25	1.40783	0.410848	7.25213	1	1	5422.74	113.242	672.735	4636.76	40.9456	3.42665	1.51747	716.582
412	62.9758	185.614	22.1465	111.756	26.3722	7.65178	45.8463	10.6028	147.518	50.7955	328.646	61.3891	1063.98	142.619	40.7501	462.13	391.619	3115.22	8730.25	0.932439	0.283078	8.99214	1	1	2267.91	382.492	237.991	1647.43	4.3071	3.29394	1.18005	736.01
413	0.0238336	29.5042	0.199326	3.19543	7.47035	2.00746	49.2882	16.1506	248.434	87.4714	576.308	108.379	1884.08	255.735	43.1292	565.276	509.479	5615.99	10741.7	1.2435	0.351068	3.47942	1	1	3268.25	32.9228	323.351	2911.98	88.4487	3.54205	1.10952	655.524
414	11.643	52.6645	3.04874	16.9282	11.3347	2.8755	53.6342	16.4563	242.077	83.1799	527.148	95.9676	1625.54	219.818	36.6393	524.305	385.737	5022.64	9213.26	0.892803	0.257351	4.32538	1	1	2962.32	84.2845	326.378	2551.66	30.2743	3.46921	1.35923	672.817
415	0.0742413	16.2068	0.089988	1.82919	3.83224	1.13478	28.0978	8.41906	138.597	50.2606	334.415	66.507	1151.4	157.499	18.6637	202.449	239.958	2731.88	10952.1	0.688392	0.197585	4.20853	1	1	1958.36	18.2003	180.081	1760.08	96.7065	3.48402	0.843687	670.606
416	4.85372	33.924	1.65806	8.08863	5.34669	1.71395	26.5937	8.66703	138.713	49.5386	324.688	62.1265	1097.59	148.658	26.3253	316.634	323.591	2959.14	9715.67	0.830039	0.246076	6.72225	1	1	1912.16	48.5245	181.034	1682.6	34.6753	3.3731	0.978501	709.905
417	0.518548	26.6226	0.285204	3.61797	7.35007	1.88623	39.5209	12.6211	191.463	67.4588	429.614	81.0138	1388.37	186.826	29.7155	355.694	367.004	4039.02	9654.3	0.927036	0.269635	13.083	1	1	2437.17	31.0443	252.842	2153.28	69.3616	3.43811	0.969181	771.775
418	0.199182	30.3209	0.399852	1.85344	4.78074	1.35784	29.3506	9.82372	151.836	55.0163	352.075	66.8545	1135.27	150.913	50.4354	674.494	491.998	3293.75	10034.7	1.32488	0.310661	5.11656	1	1	1990.05	32.7734	197.148	1760.13	53.7061	4.26473	1.37093	686.612
419	7.37132	50.9226	3.68344	23.076	16.2311	4.57591	81.1187	24.2167	354.479	119.356	739.678	133.058	2221.55	294.3	51.8398	645.224	529.333	6978.96	8906.36	0.830156	0.276682	9.44103	1	1	4073.62	85.0534	480.622	3507.94	41.244	3.0004	1.21894	740.518
420	0.029	22.2	0.289	4.9	7.1	2.57	25.2	6.45	64.6	19.8	76.8	15	125	25.6	2.13	65.1	59.2	569	9103	2.8	0.799	10.5	1	1	395.538	27.418	105.92	262.2	9.56306	3.50438	1.09966	750.495
421	0.121	20	0.129	1.88	3.41	1.38	14.1	4.47	51.2	18.2	81.1	17.6	160.3	35.3	2.51	71.9	63.1	549	8467	16.3	1.28	8.03	1	1	409.19	22.13	74.56	312.5	14.1211	12.7344	1.13946	725.692
422	0.49	21.7	0.363	3.47	4.94	1.76	20.3	5.88	70.8	25.5	112	23.9	216	46.5	2.96	83.2	83.2	978	8221	4.67	0.699	8.93	1	1	553.603	26.023	103.68	423.9	16.2894	6.68097	1	735.372
423	0.047	11.7	0.103	1.72	3.99	0.741	16.7	4.68	51.4	15.6	60.6	11	93	18.8	4.72	87.9	140	469	11268	3.59	1.08	6.34	1	1	290.081	13.57	77.511	199	14.6647	3.32407	0.627857	704.814
424	0.513	32.1	0.606	7.2	10.1	2.58	38.6	10.6	111	35.4	143	27.9	233	47.7	7.13	308	201	1307	9148	3.49	1.19	11.2	1	1	700.299	40.419	172.88	487	12.0488	2.93277	1.53234	756.649
425	0.008	21	0.097	1.91	5.41	0.645	28.9	9.58	109	36.8	151	31.4	270	55.5	8.46	163	288	1100	11113	4.65	1.37	4.66	1	1	721.25	23.015	153.535	544.7	23.6672	3.39416	0.565972	678.887
426	0.548	20	0.469	5.07	6.95	2.03	27.7	7.43	79.3	26.5	112	23.9	202	43.5	8.61	178	299	993	9195	6.39	1.5	6.66	1	1	557.397	26.087	123.41	407.9	15.6361	4.26	0.595318	709.092
427	2.35	33.2	1.22	7.44	9.38	1.53	32.1	10.9	124	42.4	188	42.6	402	84.2	31.3	470	1185	1407	11700	140	5.45	22.7	1	1	981.32	44.21	177.91	759.2	17.1726	25.6881	0.396624	829.188
428	0.946	26.4	0.403	3.31	3.87	0.937	22.1	8.25	109	43.5	214	50	509	115	64.2	609	2552	1942	13585	46.4	6.59	8.03	1	1	1106.72	31.059	144.157	931.5	29.9913	7.04097	0.238636	725.692
429	0.828	38.3	0.465	3.09	4.89	1.32	24.1	8.84	117	46.8	241	59.9	637	148	73.6	678	2928	2163	13512	58.2	8.5	6.57	1	1	1331.53	42.683	156.15	1132.7	26.5375	6.84706	0.231557	707.906
430	0.208	33.3	0.194	2.54	6.21	1.8	37.1	12.8	165	65.7	318	76.4	759	172	86.4	884	3288	2288	13031	45.9	6.64	7.95	1	1	1650.25	36.242	222.91	1391.1	38.3836	6.91265	0.268856	724.79
431	0.4	23.8	0.233	1.59	4.1	0.849	23.3	9.01	120	48.3	233	56.2	551	125	90.4	662	3599	1645	14534	60.2	13.1	2.8	1	1	1196.78	26.023	157.259	1013.5	38.9463	4.59542	0.18394	638.881
432	2.18	38.4	1.11	8.22	12.4	2.28	51.3	18.4	216	80	356	80.5	740	156	115	1253	292.09	2703	14622	156	16.5	17.1	1	1	1762.79	49.91	300.38	1412.5	28.3009	9.45455	4.28977	798.906
433	3.68	30.2	2.08	13.5	18	3.19	66.2	20.8	226	74	321	73	687	144	111	41.4	292.09	1152	21376	83.9	17	8.47	1	1	1682.65	49.46	334.19	1299	26.2636	4.93529	0.141737	730.53
434	1.16	67.4	1.75	14.1	12.6	4.03	44.2	14.2	175	65.1	301	71.1	695	153	127	1519	292.09	2218	14010	139	17.1	17.2	1	1	1619.64	84.41	250.03	1285.2	15.2257	8.12865	5.20045	799.513
435	1.02	38.3	0.546	3.49	6.91	1.08	53.6	22.4	302	119	562	128	1247	258	172	986	292.09	5050	18115	151	25.8	6.27	1	1	2743.35	43.356	385.99	2314	53.3721	5.85271	3.37567	703.854
436	0.583	36.8	0.286	1.8	5.18	0.822	42.3	17.9	252	103	503	117	1159	250	180	851	292.09	4381	19112	190	36.7	4.31	1	1	2489.67	39.469	318.202	2132	54.0171	5.17711	2.91349	672.529
437	0.346	36	0.15	1.01	4.72	0.676	39.2	16.2	221	87.8	417	98.1	933	198	182	1056	292.09	2828	17319	143	32.1	2.17	1	1	2053.2	37.506	281.796	1733.9	46.2299	4.45483	3.61532	620.1
438	1.02	35.6	0.541	4.19	8.45	1.31	48.3	18.2	241	91.7	430	99.3	990	214	212	1320	292.09	4090	20156	186	39.1	3.11	1	1	2183.61	41.351	317.26	1825	44.1344	4.75703	4.51916	646.85
439	1.17	41.4	0.715	5.61	10.1	1.65	54.8	20	262	98.7	454	106	1002	213	214	1492	292.09	3235	17450	192	33.7	16.1	1	1	2271.14	48.895	348.55	1873.7	38.3209	5.69733	5.10801	792.678
440	0.015	30.9	0.187	3.43	6.32	2.28	27.7	8.15	91.3	32.3	148	30.2	381	59.4	2.97	63.9	97.4	1211	8926	5.88	1.05	12.1	1	1	821.182	34.532	135.75	650.9	18.8492	5.6	0.656057	764.117
441	0.516	30.4	0.397	3.74	7.46	1.93	34.8	10.5	123	42.5	176	36.3	311	63.3	6.68	139	216	1698	9847	14.6	1.88	7.96	1	1	841.843	35.053	177.69	629.1	17.9471	7.76596	0.643519	724.903
442	0.007	23.1	0.049	1.06	1.93	1.18	11.5	4.09	55.5	22.8	124	29.1	427	74.1	6.49	126	223	933	10740	4.15	1.05	5.13	1	1	775.416	24.216	74.2	677	27.9567	3.95238	0.565022	686.831
443	0.617	20.9	0.686	5.72	8.02	1.73	31.3	9.12	105	37.8	185	39.9	537	84.6	9.03	103	340	668	12276	3.88	0.718	3.2	1	1	1067.39	27.923	155.17	884.3	31.6692	5.4039	0.302941	649.04
444	0.6	37.3	0.549	5.25	7.9	1.89	31.9	8.91	100	34	140	29.7	258	55.4	10.4	278	350	1456	8693	28.8	2.39	11.5	1	1	711.399	43.699	150.6	517.1	11.8332	12.0502	0.794286	759.191
445	1.97	37.4	0.785	5.52	7.55	1.78	32.7	10.2	118	40.2	179	35.9	452	68.3	18.9	337	683	1606	12184	45.4	3.87	12.1	1	1	991.305	45.675	170.23	775.4	16.9765	11.7313	0.493411	764.117
446	0.003	19.4	0.041	0.893	2.94	0.571	21.3	7.94	100	35.9	161	31.8	379	53.6	19	310	724	1329	13656	23.8	5.23	3.52	1	1	814.388	20.337	132.751	661.3	32.5171	4.55067	0.428177	656.43
447	0.019	32.4	0.047	0.736	2.32	1.14	15.2	5.07	66.3	26.9	138	32.4	479	84.3	20.4	326	766	1131	11544	5.5	1.16	4.24	1	1	883.832	33.202	90.03	760.6	22.9083	4.74138	0.425587	671.206
448	0.272	43.9	0.467	5.18	9.54	2.78	45.9	14.9	176	60.2	268	53.8	685	98	20.7	439	782	2444	11459	47.4	7.76	14.2	1	1	1463.94	49.819	249.12	1165	23.3847	6.10825	0.561381	779.929
449	0.887	69.9	0.893	8.53	12.6	3.19	56	16.1	173	57.1	251	49.4	606	89.4	24.8	617	838	2448	11702	61.5	4.19	10.9	1	1	1394	80.21	260.89	1052.9	13.1268	14.6778	0.736277	754.051
450	0.029	43.2	0.135	2.33	4.97	2.44	34.9	12.2	152	56.2	264	55.3	710	108	26.3	384	1072	2276	11664	38	4.84	8.66	1	1	1445.7	45.694	206.51	1193.5	26.1194	7.85124	0.358209	732.555
451	1.06	46.1	0.411	3.25	5.67	2.82	36.7	13.8	176	67	321	67.5	877	136	34.3	420	1365	2687	12236	45.5	6.36	9.01	1	1	1754.31	50.821	234.99	1468.5	28.8955	7.15409	0.307692	736.193
452	0.674	30.6	0.464	3.83	5.84	1.61	30.6	10.6	129	47.1	218	50.2	488	108	39.7	738	1435	2191	11475	121	8.57	17.9	1	1	1124.52	35.568	177.65	911.3	25.6213	14.119	0.514286	803.681
453	0.258	35.7	0.355	3.64	7.04	1.96	34.2	11.8	139	50.1	240	52.1	701	108	45.1	657	1751	2241	11875	106	8.47	16.4	1	1	1385.15	39.953	194	1151.2	28.8139	12.5148	0.375214	794.579
454	0.046	36	0.097	1.23	3.64	1.21	26.2	10.1	137	52.6	265	57.4	762	116	46.9	497	1849	2116	10907	81.8	14.6	6.17	1	1	1468.52	37.373	178.15	1253	33.5269	5.60274	0.268794	702.468
455	0.073	26	0.155	1.72	4.26	1.32	25.6	9.51	124	48.1	240	52.8	723	114	49.8	520	2033	2014	12334	31.7	5.32	4.39	1	1	1370.54	27.948	164.69	1177.9	42.1461	5.95865	0.25578	674.019
456	0.095	63.7	0.151	2.36	5.96	2.2	40.5	13.9	180	69.1	341	76.5	1028	164	114	1626	292.09	2924	11829	90.4	11.1	4.29	1	1	1987.47	66.306	242.56	1678.6	25.316	8.14414	5.56678	672.153
457	0.021	1.87	0.015	0.082	1.68	0.71	17.2	7.93	95.5	27.6	101	16.5	140	20.4	3.34	16.4	1071	958	14428	2.2	2.7	20.5	1	1	430.508	1.988	123.02	305.5	153.672	0.814815	0.0153128	818.096
458	0.023	1.57	0.056	0.37	1.77	0.62	17.9	8.74	109	32.3	118	20.6	169	25.6	2.74	13.2	1251	1068	15389	2.27	3.3	3.28	1	1	505.549	2.019	138.03	365.5	181.03	0.687879	0.0105516	650.943
459	0.037	2.23	0.036	0.26	1.67	0.65	15.3	7.27	83.5	24	86.3	13.8	116	16.7	2.78	17.6	975	808	14992	1.95	2.54	3.63	1	1	367.753	2.563	108.39	256.8	100.195	0.767717	0.0180513	658.841
460	0.025	1.36	0.034	0.065	1.67	0.54	18.2	9.35	121	37	142	24.2	202	29.3	3.26	13.4	1610	1298	15053	2.16	3.51	1.8	1	1	586.744	1.484	150.76	434.5	292.79	0.615385	0.00832298	606.809
461	0.002	0.78	0.006	0.43	1.53	0.55	16.3	9.29	134	44.9	199	39.4	402	65.9	2.85	8.94	1372	1578	14722	1.26	2.52	2.28	1	1	914.088	1.218	161.67	751.2	616.749	0.5	0.00651603	623.683
462	0.038	0.73	0.073	0.95	1.98	0.5	16.7	9.12	152	59.7	328	80	951	176	4.78	9.8	2848	2218	17856	1.36	3.35	1.18	1	1	1776.79	1.791	180.3	1594.7	890.396	0.40597	0.00344101	578.197
463	0.934	2.79	0.27	0.93	0.96	0.37	8.28	2.63	22.6	4.83	14.3	2.39	20.1	2.6	4.46	13.1	917	173	15690	0.17	0.12	23.9	1	1	83.984	4.924	34.84	44.22	8.9805	1.41667	0.0142857	834.879
464	0.068	0.76	0.027	0.19	1	0.32	10.5	3.19	29.2	6.85	23.5	3.88	33.8	4.83	2.84	14.4	841	231	16877	0.3	0.11	4.94	1	1	118.115	1.045	44.21	72.86	69.7225	2.72727	0.0171225	683.695
465	0.037	1.27	0.005	0.56	2.3	0.92	15.3	4.24	34.4	7.27	22.3	3.32	25.4	3.58	5.76	29	2041	235	18154	0.27	0.42	3.54	1	1	120.902	1.872	57.16	61.87	33.0502	0.642857	0.0142087	656.873
466	0.009	1.51	0.01	0.16	0.79	0.36	8.15	2.97	28	8	27.7	5.17	44.6	6.81	4.26	21	1160	259	15138	0.61	0.88	1.06	1	1	134.239	1.689	40.27	92.28	54.6359	0.693182	0.0181034	571.224
467	0.01	2.95	0.02	0.32	1.04	0.71	13.1	4.54	42.8	10.3	30	4.74	35.9	5.04	5.89	41.7	1970	349	14404	1.43	4.83	4.24	1	1	151.47	3.3	62.19	85.98	26.0545	0.296066	0.0211675	671.206
468	0.003	3.17	0.01	0.21	1.39	0.79	15.6	5.44	50	12.2	41	6.63	51.2	6.58	9.78	43.4	3552	425	14949	2.1	6.94	2.98	1	1	194.223	3.393	73.22	117.61	34.6625	0.302594	0.0122185	643.593
469	0.006	2.2	0.011	0.18	0.65	0.42	9.35	3.73	46.2	14.5	58.1	10.8	92.8	13.2	4.44	25.9	1586	505	15942	1.21	4.24	5.34	1	1	252.147	2.397	60.35	189.4	79.0154	0.285377	0.0163304	690.186
470	0.004	2.17	0.005	0.2	1.2	0.6	14	6.24	73.1	20.1	71.2	12.7	104	14.4	1.87	19.6	810	651	12881	1.28	2.27	0.66	1	1	319.919	2.379	95.14	222.4	93.4847	0.563877	0.0241975	541.739
471	0.007	2.39	0.015	0.22	1.84	0.55	14.2	6.63	76.3	20.6	74	13	109	14.8	2.06	19.1	879	682	12872	1.48	2.18	2.39	1	1	333.552	2.632	99.52	231.4	87.9179	0.678899	0.0217292	627.123
472	0.003	2.52	0.027	0.27	1.77	0.68	19.5	8.67	102	28.1	98.6	17	133	20	2.16	23.9	871	911	14371	1.84	2.36	3.26	1	1	432.14	2.82	132.62	296.7	105.213	0.779661	0.0274397	650.471
473	0.003	2.39	0.003	0.24	1.95	0.61	16.8	6.88	81.5	23.1	81.4	14.6	117	17	1.98	21.4	832	740	13711	1.59	2.28	2.06	1	1	363.476	2.636	107.74	253.1	96.0167	0.697368	0.0257212	616.361
474	0.014	2.66	0.023	0.2	2.08	0.72	19.7	8.47	98	28.3	97.8	17.8	149	21.4	2.6	25.2	836	906	13287	1.7	2.45	6.3	1	1	446.167	2.897	128.97	314.3	108.492	0.693878	0.0301435	704.266
475	0.003	2.9	0.007	0.39	2.37	0.82	22.1	9.91	112	31.7	112	19.6	158	24.7	2.55	30.3	1032	1010	15035	1.7	2.57	3.56	1	1	496.5	3.3	147.2	346	104.848	0.661479	0.0293605	657.314
476	0.019	2.23	0.024	0.21	1.55	0.6	15.2	6.49	77.1	22.1	75.7	13.1	105	14.6	2.43	19.9	839	698	14580	1.38	2.3	3.32	1	1	333.923	2.483	100.94	230.5	92.8313	0.6	0.0237187	651.88
477	0.01	2.54	0.006	0.28	1.5	0.64	16.8	7.58	86.2	24	87.4	15.5	127	19	3.37	26.3	1044	782	14623	1.49	2.48	2.97	1	1	388.456	2.836	112.72	272.9	96.2271	0.600806	0.0251916	643.338
478	0.007	2.82	0.016	0.61	3.46	1.02	30.6	13.3	146	39.1	141	25.2	224	30.7	2.94	37	1253	1249	12598	2.02	2.22	2.1	1	1	657.833	3.453	194.38	460	133.217	0.90991	0.0295291	617.74
479	0.013	2.66	0.011	0.25	2.03	0.63	19	8.35	93.2	26.5	96.8	17.1	145	22.8	2.27	27.8	1019	866	15251	1.64	2.65	4.28	1	1	434.344	2.934	123.21	308.2	105.044	0.618868	0.0272816	671.964
480	0.013	2.88	0.038	0.64	2.9	1.08	24.9	11.4	126	35.1	124	21.7	175	26.1	2.83	31	1018	1145	15362	2.08	2.79	2.73	1	1	551.751	3.571	166.28	381.9	106.945	0.74552	0.0304519	636.981
481	0.003	2.69	0.013	0.26	1.71	0.57	19.7	8.15	94.7	25.7	88.5	15.3	122	17.7	2.87	28.1	1096	830	15049	1.49	2.86	6.59	1	1	396.996	2.966	124.83	269.2	90.762	0.520979	0.0256387	708.171
482	0.011	0.49	0.007	0.074	0.14	0.12	1.93	1.29	16.6	3.06	8.16	1.03	7.12	0.89	1.71	2.89	426	138	13340	0.95	2.75	1.31	1	1	40.922	0.582	20.08	20.26	34.811	0.345455	0.00678404	585.104
483	0.02	1.07	0.01	0.015	0.37	0.37	5.95	2.8	31.5	4.84	10.7	1.23	10.1	1.21	2.34	6.42	676	199	13420	0.6	1.06	5.92	1	1	70.185	1.115	40.99	28.08	25.1839	0.566038	0.00949704	698.92
484	0.015	1.6	0.008	0.15	0.42	0.41	6.8	2.84	30.3	5.49	16.2	2.61	20	2.87	1.9	10.3	637	216	13800	0.74	1.32	2.99	1	1	89.713	1.773	40.77	47.17	26.6046	0.560606	0.0161695	643.848
485	0.004	1.62	0.005	0.16	1.01	0.71	13.6	7.03	69.3	9.69	19	2.42	16.9	1.78	3.64	13	1117	403	13482	0.57	0.37	4.99	1	1	143.229	1.789	91.65	49.79	27.8312	1.54054	0.0116383	684.53
486	0.054	3.49	0.05	0.5	1.36	0.61	9.47	3.06	26.7	4.19	10.3	1.49	10.9	1.45	2.97	26.5	791	166	13548	1.4	1.28	8.29	1	1	73.624	4.094	41.2	28.33	6.91988	1.09375	0.0335019	728.576
487	0.016	3.12	0.03	0.44	1.69	0.68	19.4	8.49	123	33.4	113	18.2	149	20.9	3.48	18.9	691	1184	14583	1.91	3.13	5.06	1	1	491.366	3.606	153.26	334.5	92.7621	0.610224	0.0273517	685.687
488	0.004	2.35	0.013	0.27	1.7	0.61	18.5	8.97	135	46.6	227	47.1	488	78.6	2.74	37.4	689	1651	13230	1.19	2.24	3.22	1	1	1054.72	2.637	164.78	887.3	336.481	0.53125	0.0542816	649.519
489	0.005	2.41	0.006	0.16	1.01	0.52	13	6.32	89.2	23.9	83.3	13.5	113	15.8	2.19	14.4	549	870	14079	1.66	2.64	13.6	1	1	362.131	2.581	110.05	249.5	96.668	0.628788	0.0262295	775.616
490	0.006	2.52	0.008	0.45	1.95	0.83	20.2	10.3	139	37.4	127	21	172	24.3	1.96	17.8	709	1337	14292	2.17	3.35	3.24	1	1	556.964	2.984	172.28	381.7	127.916	0.647761	0.0251058	649.996
491	0.004	1.92	0.02	0.17	1.08	0.4	12.3	6.48	92.5	30.6	141	29.3	320	52	0.99	12	403	1095	12948	0.83	1.38	2.3	1	1	687.774	2.114	112.76	572.9	271.003	0.601449	0.0297767	624.318
492	0.014	2.57	0.009	0.24	1.24	0.58	12.4	6.99	91.6	24.4	84.6	13.4	117	15.2	1.53	14	569	897	13338	1.69	2.68	0.085	1	1	370.243	2.833	112.81	254.6	89.8694	0.630597	0.0246046	434.8
493	0.026	2.02	0.017	0.4	1.45	0.57	15.3	7.84	118	41.1	196	41.6	431	68	1.23	18.4	517	1467	13922	1.24	1.65	4.54	1	1	923.323	2.463	143.16	777.7	315.753	0.751515	0.0355899	676.753
494	0.008	2.37	0.024	0.47	2.72	0.68	24.7	11.9	169	58.4	283	59.7	652	101	1.78	42.4	583	2034	11056	1.5	1.9	6.51	1	1	1365.97	2.872	209	1154.1	401.845	0.789474	0.0727273	707.108
495	0.013	1.94	0.004	0.46	1.69	0.58	22.3	10.8	163	54.9	265	56.7	592	92.9	1.95	45.3	632	1924	13428	1.4	1.63	5.87	1	1	1262.29	2.417	198.37	1061.5	439.181	0.858896	0.0716772	698.196
496	0.004	2.61	0.029	0.89	4	0.89	34.9	16.6	248	89	440	94.9	1063	160	2.85	47	811	3347	12213	2.34	2.76	7.65	1	1	2154.82	3.533	304.39	1846.9	522.757	0.847826	0.0579531	721.337
497	0.007	2.11	0.029	0.64	3.33	0.77	26.8	12.6	180	60.5	283	60.6	615	96.6	2.36	46	629	2140	12559	1.43	1.72	4.22	1	1	1341.99	2.786	223.5	1115.7	400.467	0.831395	0.073132	670.825
498	0.008	2.36	0.038	0.75	2.87	0.79	29.2	14.3	211	73.2	347	72.6	765	121	1.81	54	826	2722	12384	1.78	2.27	4.51	1	1	1640.12	3.156	258.16	1378.8	436.882	0.784141	0.0653753	676.212
499	0.005	3.08	0.016	0.39	2.34	0.86	20.2	11.4	165	47.2	178	30.5	270	37.1	2.09	21.3	823	1653	14285	2.47	3.2	4.42	1	1	766.091	3.491	199.8	562.8	161.215	0.771875	0.0258809	674.572
500	0.013	2.21	0.011	0.31	1.53	0.63	17.6	9.97	154	50.1	215	41.4	385	52.6	2.14	13.5	829	1815	14803	2.06	3.47	3.15	1	1	930.374	2.544	183.73	744.1	292.492	0.59366	0.0162847	647.83
501	0.071	1.56	0.053	0.69	2.79	0.88	26.6	14.2	233	84.9	420	86.6	843	136	1.62	26.5	522	3197	13006	1.33	1.71	3.58	1	1	1850.34	2.374	277.47	1570.5	661.542	0.777778	0.0507663	657.753
502	0.005	1.9	0.009	0.56	1.53	0.55	19.6	10.4	172	55.9	243	43.9	396	55	2.61	13.9	715	2017	14465	1.92	3.28	3.11	1	1	1000.35	2.474	204.08	793.8	320.857	0.585366	0.0194406	646.85
503	0.003	2.14	0.008	0.6	2.82	0.88	30	16.4	258	95.5	462	97.7	994	161	2.15	34.8	708	3594	13157	1.71	2.42	4.33	1	1	2121.05	2.751	308.1	1810.2	658.015	0.706612	0.0491525	672.904
504	0.005	1.39	0.015	0.26	1.37	0.38	17.4	9.32	145	49.9	231	45.8	443	63.9	1.92	20.4	567	1808	13786	1.19	2.05	2.34	1	1	1008.74	1.67	173.47	833.6	499.162	0.580488	0.0359788	625.576
505	0.013	1.73	0.023	0.27	1.72	0.5	14.8	9.39	157	53.2	238	45.7	412	59.3	2.96	12	663	1947	14848	1.59	2.86	4.33	1	1	993.646	2.036	183.41	808.2	396.955	0.555944	0.0180995	672.904
506	0.006	1.81	0.01	0.54	1.53	0.56	23.6	12.4	193	69.9	345	74.4	780	119	2.97	36.1	622	2616	11802	1.37	1.95	5.25	1	1	1621.76	2.366	231.09	1388.3	586.771	0.702564	0.0580386	688.762
507	0.004	1.61	0.024	0.2	1.62	0.5	14.3	8.3	128	43.3	188	34.7	321	43.9	1.68	11.9	709	1553	13628	1.61	3.36	1.51	1	1	785.458	1.838	152.72	630.9	343.254	0.479167	0.0167842	594.675
508	0.003	1.44	0.004	0.12	1.32	0.37	13.2	7.72	133	42.4	183	34	308	39.4	1.43	9.5	541	1523	13032	1.11	2.41	4.75	1	1	763.977	1.567	155.61	606.8	387.237	0.460581	0.0175601	680.458
509	0.009	1.68	0.015	0.33	2.04	0.53	19.3	11.1	176	59.5	268	51.8	502	68.7	2.13	18.1	691	2193	12750	1.37	2.36	2.96	1	1	1161	2.034	208.97	950	467.06	0.580508	0.0261939	643.082
510	0.003	0.27	0.002	0.042	0.36	0.16	4.4	2.4	24.2	4.2	9.46	1.49	12.3	1.23	6.07	8.11	1641	171	12976	0.3	0.47	3.63	1	1	60.517	0.317	31.52	28.68	90.4732	0.638298	0.00494211	658.841
511	0.003	1.76	0.011	0.18	1.69	0.98	21.5	7.85	55.8	8.72	18.2	2.31	16	1.72	12.9	42	292.09	332	15479	0.69	1.13	3.18	1	1	136.724	1.954	87.82	46.95	24.0276	0.610619	0.143791	648.558
512	0.01	1.68	0.024	0.22	0.71	0.28	6.25	2.94	31.7	6.5	19	3.17	23.5	3.03	3.56	9.7	1234	245	13871	1.02	1.23	3.9	1	1	99.014	1.934	41.88	55.2	28.5419	0.829268	0.00786062	664.512
513	0.003	1.35	0.022	0.23	1.29	0.44	10.2	3.43	28.8	6.08	16.7	2.58	20.8	2.67	4.96	19.5	1764	206	14705	0.67	1.49	0.97	1	1	94.595	1.605	44.16	48.83	30.4237	0.449664	0.0110544	565.541
514	0.005	1.75	0.003	0.35	1.43	0.61	13.5	6.81	73.4	19.7	62.7	11.2	97.1	12.4	1.75	14.9	615	625	13969	1.38	1.92	5.56	1	1	300.958	2.108	95.75	203.1	96.3472	0.71875	0.0242276	693.587
515	0.003	1.8	0.012	0.12	1.24	0.55	15.2	6.73	76.5	20.3	67.4	12	102	14.4	2.09	15.2	543	671	14166	1.46	1.91	5.3	1	1	318.255	1.935	100.22	216.1	111.68	0.764398	0.0279926	689.556
516	0.003	2.41	0.021	0.34	2.08	0.62	17.2	8.07	91.2	24.4	85.3	15	128	17.4	2.24	19.8	785	804	13217	1.77	2.43	2.49	1	1	392.044	2.774	119.17	270.1	97.3684	0.728395	0.0252229	630.138
517	0.003	1.51	0.005	0.13	1.19	0.41	10.8	5.56	66.8	19.1	70.1	12.7	107	15.7	1.47	12	579	640	14773	1.08	2	3.42	1	1	311.008	1.648	84.76	224.6	136.286	0.54	0.0207254	654.183
518	0.005	1.98	0.018	0.21	1.72	0.51	16.4	7.99	92.9	25.9	90.2	15.8	125	17.5	2.23	18	1067	858	15272	1.6	2.87	2.24	1	1	396.133	2.213	119.52	274.4	123.995	0.557491	0.0168697	622.397
519	0.003	2.37	0.022	0.47	2.14	0.7	19.7	9.71	110	29.8	101	18	152	21.5	1.82	21.7	846	986	14571	2.13	2.71	3.23	1	1	467.415	2.865	142.25	322.3	112.496	0.785978	0.0256501	649.758
520	0.008	2.37	0.028	0.41	2.39	0.87	26.5	11.7	141	38.5	132	21.5	168	23.1	3.15	26.2	1207	1268	14919	2.21	3.26	3.72	1	1	568.376	2.816	182.46	383.1	136.044	0.677914	0.0217067	660.769
521	0.005	2.46	0.016	0.38	2.32	0.86	23.8	11	131	36.3	123	21.2	173	22.7	2.92	24.7	1206	1184	14430	2.1	2.8	0.48	1	1	548.041	2.861	168.98	376.2	131.492	0.75	0.0204809	523.052
522	0.003	2.32	0.025	0.25	2.29	0.82	23.8	11.1	125	33.7	115	19.9	161	20.4	2.61	22.1	1257	1121	13884	2.48	3.6	2.73	1	1	515.608	2.598	163.01	350	134.719	0.688889	0.0175815	636.981
523	0.003	1.9	0.02	0.54	2.42	0.89	25.3	11.2	134	37.2	129	22.2	184	24.6	2.75	21.1	1265	1217	14855	2.5	3.49	4.61	1	1	573.273	2.463	173.81	397	161.186	0.716332	0.0166798	678.004
524	0.005	2.27	0.02	0.67	2.5	0.79	21.9	9.89	117	30.7	104	18	145	19.1	3.1	24.4	1156	1014	14572	2.13	3.03	3.46	1	1	471.845	2.965	152.08	316.8	106.847	0.70297	0.0211073	655.088
525	0.006	1.78	0.029	0.46	1.93	0.82	20.1	10.1	118	32.9	114	19.8	165	22.2	2.77	18.4	1197	1079	13376	2.11	2.94	5.17	1	1	507.125	2.275	150.95	353.9	155.56	0.717687	0.0153718	687.478
526	0.003	2.32	0.007	0.25	1.67	0.7	19.5	8.68	100	26.7	89.5	15.4	126	16.2	2.28	22.6	1127	888	13595	1.69	3.4	3.56	1	1	406.93	2.58	130.55	273.8	106.124	0.497059	0.0200532	657.314
527	0.003	1.5	0.004	0.36	1.97	0.81	23.6	11.2	136	38.7	137	24.8	206	27.9	2.79	17.5	1215	1273	14704	2.18	3.42	1.22	1	1	609.847	1.867	173.58	434.4	232.673	0.637427	0.0144033	580.388
528	0.003	1.85	0.016	0.39	2	0.71	19.8	8.84	107	28.8	99.2	17.4	147	20.2	3.01	17.7	834	953	15294	1.93	2.84	5.46	1	1	453.209	2.259	138.35	312.6	138.38	0.679577	0.021223	692.055
529	0.006	1.48	0.015	0.25	1.89	0.71	20.3	9.33	114	31.1	109	19.3	160	22.1	1.83	15.7	954	1033	14846	2.12	3.03	4.58	1	1	489.481	1.751	146.23	341.5	195.031	0.69967	0.016457	677.47
530	0.005	2.34	0.021	0.34	2.13	0.67	24.1	11.2	135	37.6	137	23.1	189	26.1	2.72	24.4	1330	1253	14965	2.12	2.76	0.82	1	1	588.606	2.706	173.1	412.8	152.55	0.768116	0.0183459	554.988
531	0.005	2.17	0.029	0.61	2.49	0.89	26.1	11.8	138	36.4	125	21.7	177	22.4	3.32	24	1388	1188	13954	2.47	3.5	3.96	1	1	564.594	2.814	179.28	382.5	135.928	0.705714	0.0172911	665.728
532	0.008	2.07	0.009	0.5	2.15	0.82	24.1	11.5	140	39.1	138	24.5	201	27.5	2.46	21.6	1275	1292	15088	2.04	3.46	4.46	1	1	611.257	2.587	178.57	430.1	166.254	0.589595	0.0169412	675.305
533	0.005	1.15	0.007	0.4	1.5	0.42	17.9	8.83	117	35.1	131	23.3	195	27.5	2.11	12.2	1021	1177	15711	1.28	2.57	1.69	1	1	559.112	1.562	145.65	411.9	263.7	0.498054	0.0119491	602.415
534	0.011	0.57	0.012	0.21	1.4	0.33	14.5	7.84	96.8	26.5	87.4	14.4	112	14.6	0.92	7.27	481	894	13311	0.73	1.29	2.73	1	1	376.573	0.803	120.87	254.9	317.435	0.565891	0.0151143	636.981
535	0.017	1.72	0.032	0.35	1.84	0.65	19.2	9.83	121	35.6	129	23.2	199	26.3	3.3	16.1	1128	1160	14126	1.92	3.16	4.39	1	1	567.739	2.119	152.52	413.1	194.95	0.607595	0.014273	674.019
536	0.006	0.62	0.007	0.33	1.42	0.42	21.2	13.6	216	80.3	387	94.3	994	153	11.3	13.5	292.09	3099	18844	2.07	8.05	3.25	1	1	1962.2	0.963	252.64	1708.6	1774.25	0.257143	0.0462186	650.234
537	0.013	0.55	0.01	0.24	0.97	0.34	16.1	9.66	157	56.9	271	62	627	98.4	6.26	10.3	3608	2106	18979	1.49	4.8	1.05	1	1	1300.18	0.813	184.07	1115.3	1371.83	0.310417	0.00285477	570.613
538	0.007	0.58	0.021	0.51	2.16	0.48	25.5	15.8	249	89	416	96.9	986	149	7.91	14	292.09	3339	17656	2.37	6.85	2.75	1	1	2030.96	1.118	292.94	1736.9	1553.58	0.345985	0.0479304	637.528
539	0.008	1.01	0.065	0.56	4.91	0.7	35.7	23.3	367	134	637	154	1578	233	16.1	21.8	292.09	5192	19454	2.83	11.4	2.49	1	1	3169.25	1.643	431.61	2736	1665.25	0.248246	0.0746345	630.138
540	0.01	0.63	0.017	0.4	2.27	0.51	22.4	15.1	246	92.6	460	113	1215	192	12.2	17.4	292.09	3547	21730	2.4	8.81	4.81	1	1	2359.94	1.057	286.28	2072.6	1960.83	0.272418	0.0595707	681.492
541	0.008	0.61	0.019	0.38	1.91	0.39	21.9	14.2	239	91.2	447	109	1119	187	10.9	15.3	292.09	3558	24008	2.07	9.85	2.57	1	1	2231.62	1.017	277.4	1953.2	1920.55	0.210152	0.0523811	632.478
542	0.03	0.63	0.01	0.29	2.29	0.42	22.4	14	228	86.5	423	106	1147	173	12.4	16.2	292.09	3329	21150	2.02	9.32	3.33	1	1	2203.57	0.96	267.11	1935.5	2016.15	0.216738	0.0554624	652.113
543	0.017	0.73	0.004	0.79	2.08	0.51	26.3	16.8	280	107	517	129	1339	215	14	20.7	292.09	4037	23519	2.68	12.2	2.7	1	1	2634.23	1.541	325.69	2307	1497.08	0.219672	0.0708686	636.154
544	0.006	1.55	0.006	0.062	0.34	0.32	6	3.27	36.8	7.1	16.8	2.27	17.8	2.17	3.85	9.15	1123	250	13697	1.07	2.89	1.75	1	1	94.494	1.624	46.73	46.14	28.4113	0.370242	0.00814782	604.841
545	0.011	2.25	0.004	0.09	0.74	0.5	8.75	4.74	40.9	7.27	17.8	2.09	15.2	2.05	3.94	14.1	1270	257	14524	1.09	1.84	2.55	1	1	102.395	2.355	55.63	44.41	18.8577	0.592391	0.0111024	631.899
546	0.006	5.64	0.012	0.2	1.36	0.78	18.9	11.6	184	72.2	319	63	554	77.4	2.83	32.9	1052	2545	15663	4.63	8.48	1.83	1	1	1308.1	5.858	216.64	1085.6	185.319	0.545991	0.0312738	607.969
547	0.006	2.29	0.01	0.25	0.89	0.55	15.2	8.07	107	30.7	111	19.2	155	23.5	1.18	11.7	475	1042	15539	1.18	2.38	1.18	1	1	473.666	2.556	131.71	339.4	132.786	0.495798	0.0246316	578.197
548	0.007	2.31	0.007	0.16	1.38	0.49	12.4	6.66	95.2	29.4	108	18.6	153	21.6	1.17	11.2	403	979	15801	1.37	2.61	5.38	1	1	449.214	2.484	116.13	330.6	133.092	0.524904	0.0277916	690.813
549	0.006	2.07	0.02	0.24	1.44	0.59	13	7.62	100	29.7	102	18.9	159	21.7	0.93	10.8	470	957	13248	1.34	2.44	2.1	1	1	456.286	2.336	122.65	331.3	141.824	0.54918	0.0229787	617.74
550	0.006	1.56	0.008	0.26	1.39	0.56	13.5	7.38	103	31.4	110	20.4	170	22.9	0.94	9.06	435	1026	13910	1.17	2.25	1.44	1	1	482.364	1.834	125.83	354.7	193.402	0.52	0.0208276	591.454
551	0.003	1.93	0.008	0.28	1.8	0.61	17.3	8.74	119	36.2	127	23.8	200	26.7	1.5	10.9	511	1182	14196	1.41	2.65	3.12	1	1	563.371	2.221	147.45	413.7	186.267	0.532075	0.0213307	647.096
552	0.002	1.74	0.015	0.27	1.43	0.5	15.9	8.03	111	33.2	119	21.7	191	25.8	1.19	11.5	518	1106	14426	1.4	2.29	3.14	1	1	529.587	2.027	136.86	390.7	192.748	0.611354	0.0222008	647.586
553	0.006	1.42	0.011	0.29	1.48	0.49	17.7	9.46	135	43.2	157	27.9	224	31	0.96	8.72	428	1449	14377	1.27	2.07	2.58	1	1	648.957	1.727	164.13	483.1	279.734	0.613527	0.0203738	632.766
554	0.009	1.55	0.019	0.2	1.26	0.42	14.1	7.44	101	32.6	121	21.4	183	27.3	1.02	9.79	451	1066	14844	1.19	2.47	2.21	1	1	511.298	1.778	124.22	385.3	216.704	0.481781	0.0217073	621.42
555	0.01	1.78	0.015	0.31	1.57	0.42	13.3	7.41	102	31.2	113	20.7	173	24.3	0.96	10.4	462	1029	14563	1.13	2.27	2.84	1	1	489.015	2.115	124.7	362.2	171.253	0.497797	0.0225108	639.95
556	0.003	1.74	0.004	0.37	1.13	0.49	12.4	6.86	90.8	28.2	100	18.2	156	21.3	1.13	9.56	481	905	13415	1.23	2.33	3.39	1	1	437.497	2.117	111.68	323.7	152.905	0.527897	0.0198753	653.498
557	0.018	3.01	0.014	0.3	2.01	0.76	18.3	9.5	123	34.6	112	19.6	153	20.7	2.67	15.2	582	1112	14524	1.77	3.12	0.73	1	1	496.812	3.342	153.57	339.9	101.706	0.567308	0.0261168	547.839
558	0.016	1.03	0.016	0.28	1.49	0.51	18.5	10.6	148	47.6	173	31.1	250	32.6	1.43	8.1	412	1542	13521	1.27	2.08	1.95	1	1	714.742	1.342	179.1	534.3	398.137	0.610577	0.0196602	612.451
559	0.016	1.61	0.015	0.15	1.64	0.38	12.1	6.88	95.5	30.6	115	20.3	166	25	1.12	9.34	440	1020	14252	1.03	2.03	3.4	1	1	475.191	1.791	116.5	356.9	199.274	0.507389	0.0212273	653.727
560	0.037	1.88	0.057	0.21	1.39	0.67	17.9	9.44	133	41.1	151	26.9	220	32.8	2.01	12.2	510	1368	15652	1.79	2.67	25.1	1	1	636.384	2.184	162.4	471.8	216.026	0.670412	0.0239216	840.346
561	0.018	1.87	0.01	0.24	2.02	0.61	16.7	9.54	128	39.8	142	25.8	215	30	1.12	11.3	519	1284	14836	1.66	2.7	0.59	1	1	611.608	2.138	156.87	452.6	211.693	0.614815	0.0217726	535.061
562	0.009	2.38	0.012	0.25	1.72	0.66	15.1	7.66	100	27.5	91.4	15.3	127	17.3	1.12	13.6	534	910	14065	1.53	2.7	3.51	1	1	406.291	2.651	125.14	278.5	105.055	0.566667	0.0254682	656.207
563	0.01	1.76	0.013	0.42	1.5	0.5	15.6	8.25	112	34.6	124	22.2	190	26.5	1.11	10.1	451	1133	14647	1.24	2.09	2.25	1	1	537.353	2.203	137.85	397.3	180.345	0.593301	0.0223947	622.72
564	0.01	2.3	0.001	0.36	1.28	0.54	14	7.88	102	30.3	102	17.4	139	21	1.03	12.8	485	977	15411	1.34	2.31	3.67	1	1	438.071	2.671	125.7	309.7	115.949	0.580087	0.0263918	659.703
565	0.006	1.61	0.013	0.32	1.58	0.54	14.2	7.98	112	34.9	129	23.2	193	26.3	1.1	9.17	496	1138	13784	1.26	2.14	2.52	1	1	544.649	1.949	136.3	406.4	208.517	0.588785	0.0184879	631.023
566	0.006	0.99	0.012	0.28	1.12	0.54	16.2	9.54	148	49.9	201	38	331	46.9	0.85	7.46	510	1665	13665	1.06	2.03	2.26	1	1	843.488	1.288	175.4	666.8	517.702	0.522167	0.0146275	623.042
567	0.003	1.35	0.016	0.31	1.6	0.53	17	9.57	143	45.5	171	30.9	240	34	1.37	9.85	505	1527	15864	1.15	2.26	6.1	1	1	694.779	1.679	171.7	521.4	310.542	0.50885	0.019505	701.487
568	0.036	1.01	0.037	0.5	1.96	0.64	20.1	11.1	160	54	203	35.2	276	40	0.89	9.84	460	1874	15673	1.22	2.22	3.67	1	1	803.583	1.583	193.8	608.2	384.207	0.54955	0.0213913	659.703
569	0.006	1.05	0.012	0.18	1.55	0.51	16.4	9.64	141	46.8	181	33.6	288	37.3	0.79	7.02	427	1568	13104	1.12	1.97	1.5	1	1	757.048	1.248	169.1	586.7	470.112	0.568528	0.0164403	594.223
570	0.006	1.01	0.01	0.14	1.61	0.48	18.3	11.4	175	57.7	235	44.4	387	56.6	1.04	8.77	555	2053	14797	1.22	2.43	2.66	1	1	988.656	1.166	206.79	780.7	669.554	0.502058	0.0158018	635.039
571	0.003	0.91	0.006	0.24	1.52	0.48	18.6	11	194	77	378	90.6	951	168	2.02	9.23	1100	2850	17176	1.46	3.52	0.36	1	1	1891.36	1.159	225.6	1664.6	1436.24	0.414773	0.00839091	506.892
572	0.08	54	1.2	22.6	47.2	7.7	209	64	701	213	827	153	1381	170	73	764	499	6373	7347	4.7	2	11.7	1	1	3850.78	77.88	1028.9	2744	35.2337	2.35	1.53106	760.856
573	0.13	34	0.9	18.5	36.3	6.8	181	54	583	179	718	132	1151	160	55	595	369	5428	8528	3.6	1.6	13.2	1	1	3254.63	53.53	861.1	2340	43.7138	2.25	1.61247	772.655
574	0.08	38	0.9	16.4	37.3	6	185	57	635	200	767	148	1344	168	66	663	467	5693	7836	3.9	1.9	13.1	1	1	3602.68	55.38	920.3	2627	47.4359	2.05263	1.4197	771.903
575	0.06	28	0.8	15.4	30	5.2	142	44	475	147	582	108	1002	126	42	427	327	4334	7883	2.5	1.4	13	1	1	2705.46	44.26	696.2	1965	44.3967	1.78571	1.30581	771.146
576	0.12	62	1.5	30	62.5	11	318	95	116.35	321	1229	219	1877	252	100	1149	597	9349	8514	7.4	2.5	16.9	1	1	4594.47	93.62	602.85	3898	41.6364	2.96	1.92462	797.685
577	0.09	36	1	18	36.9	6.1	173	53	586	181	717	131	1152	157	46	527	350	5507	8539	3.1	1.5	18.8	1	1	3248.09	55.09	855	2338	42.4396	2.06667	1.50571	808.851
578	0.1	38	0.7	15.6	35.4	5.9	174	53	586	181	706	131	1196	152	64	659	447	5349	7796	3.1	1.7	11	1	1	3274.7	54.4	854.3	2366	43.4926	1.82353	1.47427	754.924
579	0.14	51	1.2	23.4	48.4	8.1	249	73	801	247	945	176	1602	195	76	840	548	7033	7867	5.6	2.2	17	1	1	4420.24	75.74	1179.5	3165	41.7877	2.54545	1.53285	798.297
580	0.16	50	1.6	30.6	53.1	10.1	233	70	744	225	869	159	1394	178	65	699	420	6624	7545	5.1	1.9	14.3	1	1	4017.56	82.36	1110.2	2825	34.3006	2.68421	1.66429	780.633
581	0.2	45	1.3	26.4	54.5	10.3	247	74	776	234	878	160	1387	181	63	724	411	6746	7564	5.8	2.2	24.8	1	1	4074.7	72.9	1161.8	2840	38.9575	2.63636	1.76156	839
582	0.16	48	1.6	29.2	56.9	10	241	71	746	221	851	154	1361	170	60	663	414	6377	7896	5.1	2	17.4	1	1	3960.86	78.96	1124.9	2757	34.9164	2.55	1.60145	800.717
583	0.09	130	1.1	20.8	49.1	5.6	270	84	935	293	1149	211	1836	233	199	2291	1248	8687	7874	12.3	5.1	18.7	1	1	5217.69	151.99	1343.7	3722	24.4885	2.41176	1.83574	808.286
584	0.12	59	1.2	23.3	51.2	8.2	258	80	874	268	1037	191	1655	216	93	1072	627	7949	8498	4.8	2.1	14.9	1	1	4722.02	83.62	1271.4	3367	40.2655	2.28571	1.70973	784.778
585	0.08	41	0.9	16.4	37.8	5.9	189	59	658	206	816	149	1325	181	68	775	467	6162	9024	3.9	2	18.2	1	1	3685.08	58.38	949.7	2677	45.8547	1.95	1.65953	805.427
586	0.05	52	0.7	13.4	30.5	5.9	167	51	558	171	663	121	1124	140	89	986	568	5047	7159	6.1	2.7	20	1	1	3097.55	66.15	812.4	2219	33.545	2.25926	1.73592	815.443
587	0.05	99	2.4	48.8	74.2	13.1	334	98	116.35	307	1135	200	1674	240	90	1202	643	9646	9050	6.8	2.4	23.7	1	1	4341.9	150.25	635.65	3556	23.6672	2.83333	1.86936	833.947
588	0.12	51	1.2	27.2	43.5	7.8	199	59	628	198	757	136	1158	169	47	608	412	5982	8648	4	1.6	24.6	1	1	3434.82	79.52	937.3	2418	30.4074	2.5	1.47573	838.094
589	0.15	60	1.4	28.4	49.3	8.9	226	68	735	229	867	156	1323	192	67	849	504	7165	9057	5.2	1.9	20.2	1	1	3944.15	89.95	1087.2	2767	30.7615	2.73684	1.68452	816.51
590	0.25	140	3.4	68.1	96.2	17.9	23.25	120	116.35	367	1342	235	1939	274	110	1518	762	11325	8571	7.7	2.4	25.2	1	1	4742.45	211.75	373.7	4157	19.6316	3.20833	1.99213	840.793
591	0.19	70	2	37.2	54.7	9.7	247	73	752	233	872	154	1296	187	61	799	493	7103	8578	4.9	1.9	19.9	1	1	3987.79	109.39	1136.4	2742	25.0663	2.57895	1.62069	814.906
592	0.23	83	1.7	37.5	58.6	9.1	255	77	812	254	957	171	1461	210	78	1071	629	7985	8804	4.9	2	17.4	1	1	4387.13	122.43	1211.7	3053	24.9367	2.45	1.7027	800.717
593	0.19	62	1.5	32.1	50.8	9.4	232	68	726	224	847	152	1285	185	59	795	493	6909	9100	4.2	1.9	19.9	1	1	3874.99	95.79	1086.2	2693	28.1136	2.21053	1.61258	814.906
594	0.11	48	1.3	24.9	40.5	7.4	181	54	581	181	686	123	1043	153	43	569	390	5387	8793	3	1.5	17.2	1	1	3124.21	74.31	863.9	2186	29.4173	2	1.45897	799.513
595	0.24	58	1.4	28.9	44.6	8.4	200	59	622	194	735	132	1122	162	52	686	448	5807	8143	4.6	2	17.6	1	1	3367.54	88.54	934	2345	26.4852	2.3	1.53125	801.911
596	0.17	84	1.5	28.9	52	8.8	249	75	800	252	963	174	1478	218	89	1220	681	7998	9330	6.6	2.8	24.7	1	1	4384.37	114.57	1184.8	3085	26.9268	2.35714	1.79148	838.548
597	0.25	59	2.1	39.9	56.8	12.4	254	72	737	223	817	145	1201	168	50	694	424	6926	8492	4.3	1.7	26.1	1	1	3787.45	101.25	1132.2	2554	25.2247	2.52941	1.63679	844.745
598	0.11	61	1.4	28.3	47.4	8.4	227	68	727	231	887	163	1404	209	65	885	530	7363	9622	5	2.1	17.2	1	1	4062.61	90.81	1077.8	2894	31.8687	2.38095	1.66981	799.513
599	0.22	80	1.9	38.9	62.7	11.2	278	82	859	260	972	172	1456	208	75	1012	579	8141	8812	5	1.6	20.6	1	1	4481.92	121.02	1292.9	3068	25.3512	3.125	1.74784	818.62
600	0.25	117	2.6	51.5	81.2	13	354	105	116.35	328	1214	213	1781	254	107	1493	758	10315	9144	6.1	2	15.7	1	1	4630.9	171.35	669.55	3790	22.1185	3.05	1.96966	790.099
601	0.16	75	1.7	33	55	8.8	250	75	793	249	939	168	1429	211	78	1021	589	7781	9078	4.7	2	17.1	1	1	4287.66	109.86	1181.8	2996	27.2711	2.35	1.73345	798.906
602	0.24	86	2	41.7	62.4	11.2	286	83	878	268	993	177	1480	212	76	1041	606	8462	8847	4.8	1.7	11.6	1	1	4580.54	129.94	1320.6	3130	24.088	2.82353	1.71782	760.026
603	0.13	54	1.3	24.2	39.3	6.4	182	55	598	190	724	132	1147	166	53	720	469	6165	9464	3.2	1.8	10.6	1	1	3319.33	79.63	880.7	2359	29.6245	1.77778	1.53518	751.395
604	0.12	60	1.2	27.3	45.7	8	217	64	689	217	835	152	1303	191	58	783	487	6932	9530	4.4	2	14	1	1	3810.32	88.62	1023.7	2698	30.4446	2.2	1.6078	778.508
605	0.14	74	1.6	31.6	55.6	9	248	74	796	249	944	170	1441	211	75	1005	594	7888	9174	3.8	2	16.8	1	1	4304.94	107.34	1182.6	3015	28.0883	1.9	1.69192	797.069
606	0.03	54	1.1	23.1	38.3	6.2	181	56	603	191	738	135	1151	169	54	736	481	5842	9113	3.2	1.8	8.7	1	1	3346.73	78.23	884.5	2384	30.4742	1.77778	1.53015	732.977
607	0.05	194	1.1	24.7	48	6.5	245	75	797	255	982	178	1522	223	265	122.85	1903	8191	9113	19.1	8.3	28.5	1	1	4551.35	219.85	1171.5	3160	14.3734	2.3012	0.064556	854.778
608	1.27	128	4.7	53.9	55.9	1.7	229	76	935	322	1476	276	2665	343	239	2757	2119	10861	6312	41.1	7.8	9	1	1	6567.47	187.87	1297.6	5082	27.0506	5.26923	1.30109	736.091
609	1.22	109	4.9	57	64	1.6	256	84	988	332	1428	275	2450	312	185	2653	1894	10319	6747	34.8	7.5	13.1	1	1	6362.72	172.12	1393.6	4797	27.8701	4.64	1.40074	771.903
610	1.08	119	5.2	65.3	72.4	1.3	298	91	116.35	345	1474	263	2377	304	222	2725	1750	11056	6000	39	6.5	6.5	1	1	5532.63	190.58	579.05	4763	24.9921	6	1.55714	706.974
611	1.33	122	4.2	43	50.5	1.4	214	75	984	353	196	326	439.16	406	237	2848	2514	12334	8487	44.3	11.5	8.3	1	1	3215.59	170.53	1324.9	1720.16	10.0871	3.85217	1.13286	728.686
612	0.93	93	3.7	38.5	42	1.9	178	66	815	287	1301	257	2260	276	217	3043	2737	10052	5796	25.7	8.1	5.7	1	1	5620.03	136.13	1102.9	4381	32.1825	3.17284	1.1118	695.694
613	0.68	80	3.3	38.9	47.8	1.1	194	65	800	277	1213	239	2161	274	146	2120	1736	8748	6017	30.4	6.8	6.7	1	1	5394.78	122.88	1107.9	4164	33.8867	4.47059	1.2212	709.615
614	4.22	113	4.8	40.4	36.1	4.8	147	51	621	218	998	191	1691	229	260	122.85	3073	7334	5941	31.9	12.3	17.3	1	1	4349.32	162.42	859.9	3327	20.4839	2.5935	0.0399772	800.116
615	1.09	136	5.8	67.2	76.5	1.8	303	92	116.35	361	1580	288	2615	335	273	3583	2274	11741	6261	40.3	6.9	9.4	1	1	5978.74	210.09	589.65	5179	24.6513	5.84058	1.57564	740.113
616	0.73	102	2.8	33.9	40.3	2.9	178	66	833	294	1333	275	2455	287	274	3697	3263	10565	7722	22.8	13.6	3.6	1	1	5903.63	139.43	1120.2	4644	33.307	1.67647	1.13301	658.189
617	2.29	124	4.4	36.1	38.7	2	176	72	967	341	196	344	439.16	374	318	3540	3376	15563	8841	47.8	12.4	6.4	1	1	3116.65	166.79	1255.7	1694.16	10.1574	3.85484	1.04858	705.629
618	0.61	61	2	20.5	25.7	0.8	114	44	593	218	1032	220	2067	259	119	1636	1827	7459	6488	21.6	7.1	8.2	1	1	4657.61	84.11	777.5	3796	45.1314	3.04225	0.895457	727.587
619	0.59	100	3.6	40.2	48.3	1.2	194	67	844	291	1367	261	2489	321	224	2800	2266	10174	7511	32.5	11.1	8.8	1	1	6027.89	144.39	1154.5	4729	32.7516	2.92793	1.23566	734.025
620	2.1	163	8.7	96.9	102.7	1.6	23.25	127	116.35	39.6	196	382	439.16	454	283	3488	2008	15605	6401	53	5.9	7	1	1	2152.36	270.7	370.9	1510.76	5.58094	8.98305	1.73705	713.456
621	1.47	132	6	68	76	1.4	296	97	116.35	397	196	322	2806	374	226	3261	2061	12459	6089	44.3	6.8	10	1	1	4889.22	207.47	586.75	4095	19.7378	6.51471	1.58224	745.892
622	0.35	27	0.9	9.5	12.3	0.4	54.3	22	318	123	639	133	1341	173	79	872	1262	4539	6439	11.2	4.6	4.9	1	1	2853.75	37.75	407	2409	63.8146	2.43478	0.690967	683.022
623	1.72	113	4.4	47.8	52.5	1.8	225	76	945	328	1511	283	2649	338	271	3202	2521	11079	6887	35.5	7.7	9.1	1	1	6576.22	166.92	1300.3	5109	30.6075	4.61039	1.27013	737.11
624	3.33	157	7.9	74.4	64.1	5	235	81	977	329	1533	286	2609	331	395	122.85	3558	11835	4929	41.1	6.3	13.4	1	1	6692.73	242.63	1362.1	5088	20.9702	6.52381	0.0345278	774.144
625	2.39	143	7.9	73.1	69.9	2.4	262	89	116.35	385	196	352	439.16	379	279	3830	3069	12919	6016	31.3	6.8	8.4	1	1	2517.2	226.39	539.65	1751.16	7.73515	4.60294	1.24796	729.774
626	0.69	79	3	30.9	38	0.8	155	53	692	243	1138	223	2091	270	215	2553	2620	8611	7504	23.5	7.6	7	1	1	5017.39	113.59	938.8	3965	34.9062	3.09211	0.974427	713.456
627	1.45	137	6	64.4	71.8	2	287	95	116.35	383	196	309	2825	358	312	3948	2381	12668	6205	42.2	6.5	7.7	1	1	4852	208.85	572.15	4071	19.4925	6.49231	1.65813	721.92
628	2.64	162	9.1	100.5	97.5	3	341	112	116.35	39.6	196	360	439.16	390	219	3205	2447	13939	6374	35.8	7.8	7.1	1	1	2368.85	274.24	669.85	1424.76	5.1953	4.58974	1.30977	714.707
629	1.84	156	7.6	87	93.9	1.9	372	116	116.35	39.6	196	330	2912	364	240	3597	2035	12729	6133	47.4	7.2	10.9	1	1	4794.19	252.44	700.15	3841.6	15.2179	6.58333	1.76757	754.051
630	4.44	101	4.3	43.4	49.4	1.6	207	72	918	324	1456	296	2620	323	211	2874	2462	10667	5911	32.1	7.4	6.4	1	1	6420.14	153.14	1248	5019	32.7739	4.33784	1.16734	705.629
631	1.79	121	5.5	53.4	56	1.2	240	83	116.35	377	196	340	439.16	404	271	3146	2495	12938	7118	40.3	8.4	8.1	1	1	2434.4	181.69	496.55	1756.16	9.66569	4.79762	1.26092	726.476
632	2.29	185	9.3	100.6	110.4	2.1	23.25	131	116.35	39.6	196	390	439.16	411	271	122.85	2464	14980	6530	49.6	7.7	13.4	1	1	2156.05	297.19	383.1	1475.76	4.96571	6.44156	0.049858	774.144
633	2.42	145	7.8	83.1	93.8	2.3	348	108	116.35	39.6	196	311	2713	347	236	3472	2170	12288	6081	40.2	6.7	9.4	1	1	4513.37	238.32	668.45	3606.6	15.1334	6	1.6	740.113
634	1.5	257	4.2	57.9	67.3	3	272	82	959	310	1325	234	2039	267	16.06	122.85	292.09	9986	5522	139	25.9	23.9	1	1	5878.9	320.6	1383.3	4175	13.0225	5.3668	0.42059	834.879
635	6	96	2	18	19	5	79	25	280	94	377	88	911	112	5	377	219	2589	10402	19	2	8	1	1	2112	122	408	1582	12.9672	9.5	1.72146	725.355
636	4	101	1	14	18	3	94	32	353	122	506	110	958	168	4	492	177	3374	8072	14	1	14	1	1	2484	120	500	1864	15.5333	14	2.77966	778.508
637	53	150	14	82	41	3	137	48	567	197	794	166	1419	219	11	1011	489	5436	10555	26	4	24	1	1	3890	299	796	2795	9.34783	6.5	2.06748	835.343
638	1	77	1	7	16	4	70	29	375	127	535	141	1646	164	21	1134	1195	3632	9477	31	7	4	1	1	3193	86	494	2613	30.3837	4.42857	0.948954	666.53
639	1	89	1	8	19	3	93	36	434	146	581	147	1697	160	12	673	602	4043	9677	27	4	4	1	1	3415	99	585	2731	27.5859	6.75	1.11794	666.53
640	52	124	15	87	26	3	51	16	196	70	310	76	805	105	8	312	358	2070	10205	20	3	6	1	1	1936	278	292	1366	4.91367	6.66667	0.871508	700.069
641	1	53	1	14	22	7	107	34	346	123	494	106	987	156	3	297	105	3365	8599	13	1	15	1	1	2451	69	516	1866	27.0435	13	2.82857	785.456
642	3	93	1	12	24	3	95	26	312	109	490	104	927	183	3	361	109	3309	7655	14	1	15	1	1	2382	109	460	1813	16.633	14	3.31193	785.456
643	17	109	5	38	28	3	95	30	318	112	456	99	917	151	4	313	120	3079	9492	16	1	15	1	1	2378	169	474	1735	10.2663	16	2.60833	785.456
644	1	55	1	7	12	4	55	17	217	80	354	78	738	129	4	268	141	2375	8135	14	1	12	1	1	1748	64	305	1379	21.5469	14	1.90071	763.31
645	4	101	1	14	18	3	94	32	353	122	506	110	958	168	4	492	177	3374	8072	14	1	14	1	1	2484	120	500	1864	15.5333	14	2.77966	778.508
646	6	96	2	18	19	5	79	25	280	94	377	88	911	112	5	377	219	2589	10402	19	2	8	1	1	2112	122	408	1582	12.9672	9.5	1.72146	725.355
647	52	124	15	87	26	3	51	16	196	70	310	76	805	105	8	312	358	2070	10205	20	3	6	1	1	1936	278	292	1366	4.91367	6.66667	0.871508	700.069
648	84	160	21	121	41	2	85	26	283	108	484	109	1000	181	8	570	391	3397	13271	23	3	7	1	1	2705	386	437	1882	4.87565	7.66667	1.4578	713.456
649	2	62	1	3	7	1	50	23	317	130	601	143	1279	230	9	649	428	4015	11869	19	2	5	1	1	2849	68	398	2383	35.0441	9.5	1.51636	684.696
650	4	173	2	24	33	3	140	47	501	161	609	138	1518	145	12	1232	454	4183	7528	27	3	14	1	1	3498	203	724	2571	12.665	9	2.71366	778.508
651	53	150	14	82	41	3	137	48	567	197	794	166	1419	219	11	1011	489	5436	10555	26	4	24	1	1	3890	299	796	2795	9.34783	6.5	2.06748	835.343
652	1	89	1	8	19	3	93	36	434	146	581	147	1697	160	12	673	602	4043	9677	27	4	4	1	1	3415	99	585	2731	27.5859	6.75	1.11794	666.53
653	5	31	1	8	9	1	51	20	278	109	485	111	1026	184	19	602	783	3512	13889	18	3	7	1	1	2319	45	359	1915	42.5556	6	0.768838	713.456
654	1	77	1	7	16	4	70	29	375	127	535	141	1646	164	21	1134	1195	3632	9477	31	7	4	1	1	3193	86	494	2613	30.3837	4.42857	0.948954	666.53
655	6	63	3	19	21	5	67	22	218	70	276	60	602	89	9	543	275	1929	8673	51	4	15	1	1	1521	91	333	1097	12.0549	12.75	1.97455	785.456
656	1	221	1	8	20	5	108	39	443	162	664	137	1255	207	15	1114	705	4864	10343	91	3	21	1	1	3271	231	615	2425	10.4978	30.3333	1.58014	820.698
657	18	101	4	17	10	1	40	19	264	116	624	155	1609	297	63	1692	2596	4442	19244	178	14	6	1	1	3275	140	334	2801	20.0071	12.7143	0.651772	700.069
658	4	201	2	9	10	1	53	23	301	124	596	142	1459	251	75	122.85	292.09	4858	18598	161	17	6	1	1	3176	216	388	2572	11.9074	9.47059	0.42059	700.069
659	7	164	2	8	10	1	46	22	325	155	885	231	2561	493	105	2647	292.09	6839	19691	138	13	5	1	1	4910	181	404	4325	23.895	10.6154	9.06228	684.696
660	24	260	8	43	74	4	329	133	116.35	39.6	196	40.43	439.16	77.4	133	122.85	292.09	18514	19241	182	17	8	1	1	1783.94	335	656.35	792.59	2.36594	10.7059	0.42059	725.355
661	16	286	7	32	31	2	96	40	499	205	1043	267	2895	77.4	160	122.85	292.09	9300	19042	295	25	11	1	1	5496.4	341	668	4487.4	13.1595	11.8	0.42059	754.924
662	8	241	4	17	19	1	71	31	430	205	1121	294	439.16	77.4	125	122.85	292.09	9041	20625	168	17	5	1	1	2958.56	270	552	2136.56	7.91319	9.88235	0.42059	684.696
663	8	341	2	12	13	1	70	32	480	231	1291	344	439.16	77.4	198	122.85	292.09	10071	23296	327	38	10	1	1	3341.56	363	596	2382.56	6.56353	8.60526	0.42059	745.892
664	11	294	3	13	18	1	93	41	570	247	1317	347	439.16	77.4	279	122.85	292.09	9836	26324	308	52	7	1	1	3471.56	321	723	2427.56	7.56249	5.92308	0.42059	713.456
665	162	14.9	23	84	41	2	123	54	768	359	196	40.43	439.16	77.4	349	122.85	292.09	16593	26330	1.82	64	13	1	1	2383.89	283.9	988	1111.99	3.91684	0.0284375	0.42059	771.146
666	10	14.9	4	18	24	1	120	55	839	39.6	196	40.43	439.16	77.4	424	122.85	292.09	18007	23302	1.82	51	88	1	1	1878.49	46.9	1039	792.59	16.8996	0.0356863	0.42059	1001.39
667	3	14.9	1	11	21	1	122	57	833	391	196	40.43	439.16	77.4	471	122.85	292.09	17611	19833	1.82	46	7	1	1	2207.89	29.9	1034	1143.99	38.2605	0.0395652	0.42059	713.456
668	3	14.9	1	10	30	1	174	81	116.35	39.6	196	40.43	439.16	77.4	16.06	122.85	292.09	1502	28396	1.82	119	4	1	1	1223.84	28.9	402.35	792.59	27.4253	0.0152941	0.42059	666.53
669	9	66	2	11	12	3	52	18	219	77	314	83	930	100	5	291	199	2164	10253	17	2	274	1	1	1896	88	304	1504	17.0909	8.5	1.46231	1193.43
670	3	50	1	5	6	2	28	10	135	49	209	55	671	74	3	150	157	1361	9176	18	3	8	1	1	1298	59	181	1058	17.9322	6	0.955414	725.355
671	42	112	10	45	16	2	44	16	190	71	324	83	922	117	6	393	297	2032	11456	17	2	8	1	1	1994	209	268	1517	7.25837	8.5	1.32323	725.355
672	13	95	2	12	9	2	43	16	208	95	482	133	1840	324	25	1802	1163	3306	11845	21	2	3	1	1	3274	122	278	2874	23.5574	10.5	1.54944	644.102
673	14	67	3	17	10	1	34	14	179	65	288	76	891	102	7	393	336	1860	11028	18	2	10	1	1	1761	101	238	1422	14.0792	9	1.16964	745.892
674	5	45	2	11	13	4	48	17	193	66	261	65	725	85	3	194	125	1879	8324	12	1	6	1	1	1540	63	275	1202	19.0794	12	1.552	700.069
675	11	87	3	16	13	3	51	18	201	73	320	84	1013	107	8	382	356	2080	9210	22	3	7	1	1	2000	117	286	1597	13.6496	7.33333	1.07303	713.456
676	1	52	1	9	15	5	68	22	260	91	376	86	856	119	3	286	140	2448	10429	15	1	8	1	1	1961	63	370	1528	24.254	15	2.04286	725.355
677	5	45	2	11	13	4	48	17	193	66	261	65	725	85	3	194	125	1879	8324	12	1	6	1	1	1540	63	275	1202	19.0794	12	1.552	700.069
678	5	49	2	11	7	2	28	10	121	44	195	48	546	66	3	160	128	1241	9253	16	2	10	1	1	1134	67	168	899	13.4179	8	1.25	745.892
679	2	47	1	5	6	2	27	10	122	46	192	50	610	71	3	143	130	1276	8101	15	2	7	1	1	1191	55	167	969	17.6182	7.5	1.1	713.456
680	1	52	1	9	15	5	68	22	260	91	376	86	856	119	3	286	140	2448	10429	15	1	8	1	1	1961	63	370	1528	24.254	15	2.04286	725.355
681	3	50	1	5	6	2	28	10	135	49	209	55	671	74	3	150	157	1361	9176	18	3	8	1	1	1298	59	181	1058	17.9322	6	0.955414	725.355
682	14	76	4	30	22	6	80	25	282	98	393	91	960	113	10	294	160	2578	9150	15	1	15	1	1	2194	124	415	1655	13.3468	15	1.8375	785.456
683	3	49	1	7	11	3	44	15	178	60	248	65	775	83	7	228	174	1699	7883	18	1	16	1	1	1542	60	251	1231	20.5167	18	1.31034	792.038
684	3	45	1	8	9	3	41	14	162	56	236	61	707	80	5	206	176	1651	8849	19	2	162	1	1	1426	57	229	1140	20	9.5	1.17045	1097.85
685	9	66	2	11	12	3	52	18	219	77	314	83	930	100	5	291	199	2164	10253	17	2	274	1	1	1896	88	304	1504	17.0909	8.5	1.46231	1193.43
686	30	112	5	27	20	6	70	24	259	90	366	94	1030	111	6	410	206	2373	8033	18	2	17	1	1	2244	174	379	1691	9.71839	9	1.99029	798.297
687	42	112	10	45	16	2	44	16	190	71	324	83	922	117	6	393	297	2032	11456	17	2	8	1	1	1994	209	268	1517	7.25837	8.5	1.32323	725.355
688	14	67	3	17	10	1	34	14	179	65	288	76	891	102	7	393	336	1860	11028	18	2	10	1	1	1761	101	238	1422	14.0792	9	1.16964	745.892
689	11	87	3	16	13	3	51	18	201	73	320	84	1013	107	8	382	356	2080	9210	22	3	7	1	1	2000	117	286	1597	13.6496	7.33333	1.07303	713.456
690	13	95	2	12	9	2	43	16	208	95	482	133	1840	324	25	1802	1163	3306	11845	21	2	3	1	1	3274	122	278	2874	23.5574	10.5	1.54944	644.102
691	2	34	1	7	9	3	33	10	112	39	161	39	406	52	2	101	64	1111	6383	11	1	14	1	1	908	44	167	697	15.8409	11	1.57812	778.508
692	6	53	2	11	9	2	34	12	153	57	255	63	649	92	4	211	171	1680	8437	15	1	6	1	1	1398	72	210	1116	15.5	15	1.23392	700.069
693	15	73	4	21	9	1	30	11	128	48	211	50	516	68	4	191	160	1393	7780	17	2	6	1	1	1185	113	179	893	7.90265	8.5	1.19375	700.069
694	15	74	3	18	10	2	30	9	116	43	189	47	483	64	3	165	135	1277	7060	15	1	10	1	1	1103	110	167	826	7.50909	15	1.22222	745.892
695	3	42	1	10	11	4	46	13	146	54	213	50	539	66	2	130	86	1476	6056	12	1	13	1	1	1198	56	220	922	16.4643	12	1.51163	771.146
696	13	92	4	19	9	1	27	10	131	58	309	101	1511	217	27	964	1309	2133	10144	24	3	16	1	1	2502	128	178	2196	17.1562	8	0.73644	792.038
697	8	56	2	12	9	2	33	12	153	60	274	62	596	103	4	247	186	1845	7722	13	1	5	1	1	1382	78	209	1095	14.0385	13	1.32796	684.696
698	4	56	1	5	9	2	37	14	162	60	252	61	660	85	3	204	162	1700	8444	15	2	6	1	1	1408	66	224	1118	16.9394	7.5	1.25926	700.069
699	20	69	5	27	13	3	32	11	125	44	193	47	512	63	2	134	104	1251	6519	12	1	9	1	1	1164	121	184	859	7.09917	12	1.28846	736.091
700	17	85	5	29	11	2	32	11	133	50	216	54	599	71	4	192	201	1441	8127	18	2	7	1	1	1315	136	189	990	7.27941	9	0.955224	713.456
701	39	108	8	42	22	5	66	18	196	68	269	59	612	78	3	267	116	1816	6869	16	1	19	1	1	1590	197	307	1086	5.51269	16	2.30172	809.972
702	2	34	1	7	9	3	33	10	112	39	161	39	406	52	2	101	64	1111	6383	11	1	14	1	1	908	44	167	697	15.8409	11	1.57812	778.508
703	3	42	1	10	11	4	46	13	146	54	213	50	539	66	2	130	86	1476	6056	12	1	13	1	1	1198	56	220	922	16.4643	12	1.51163	771.146
704	20	69	5	27	13	3	32	11	125	44	193	47	512	63	2	134	104	1251	6519	12	1	9	1	1	1164	121	184	859	7.09917	12	1.28846	736.091
705	39	108	8	42	22	5	66	18	196	68	269	59	612	78	3	267	116	1816	6869	16	1	19	1	1	1590	197	307	1086	5.51269	16	2.30172	809.972
706	15	67	4	20	10	2	31	11	129	51	227	53	514	92	3	159	134	1514	8492	15	1	8	1	1	1226	106	183	937	8.83962	15	1.18657	725.355
707	15	74	3	18	10	2	30	9	116	43	189	47	483	64	3	165	135	1277	7060	15	1	10	1	1	1103	110	167	826	7.50909	15	1.22222	745.892
708	15	73	4	21	9	1	30	11	128	48	211	50	516	68	4	191	160	1393	7780	17	2	6	1	1	1185	113	179	893	7.90265	8.5	1.19375	700.069
709	4	56	1	5	9	2	37	14	162	60	252	61	660	85	3	204	162	1700	8444	15	2	6	1	1	1408	66	224	1118	16.9394	7.5	1.25926	700.069
710	6	53	2	11	9	2	34	12	153	57	255	63	649	92	4	211	171	1680	8437	15	1	6	1	1	1398	72	210	1116	15.5	15	1.23392	700.069
711	8	56	2	12	9	2	33	12	153	60	274	62	596	103	4	247	186	1845	7722	13	1	5	1	1	1382	78	209	1095	14.0385	13	1.32796	684.696
712	17	85	5	29	11	2	32	11	133	50	216	54	599	71	4	192	201	1441	8127	18	2	7	1	1	1315	136	189	990	7.27941	9	0.955224	713.456
713	13	92	4	19	9	1	27	10	131	58	309	101	1511	217	27	964	1309	2133	10144	24	3	16	1	1	2502	128	178	2196	17.1562	8	0.73644	792.038
714	6	88	1	7	5	1	22	11	144	65	375	114	1494	299	31	1223	1397	2505	11775	33	4	11	1	1	2632	102	183	2347	23.0098	8.25	0.875447	754.924
715	3	73	1	5	5	1	14	6	85	44	280	96	1357	272	33	1368	1461	1756	11921	51	5	22	1	1	2242	82	111	2049	24.9878	10.2	0.936345	825.756
716	0.0164	2.36	0.0191	0.242	1.018	0.157	3.13	1.323	19.5	8.11	43.5	11.78	136.7	27.9	0.73	10.2	36.2	272	11560	0.703	0.287	16.8	1	1	255.756	2.6375	25.128	227.99	86.4417	2.44948	0.281768	797.069
717	0.0047	2.622	0.0292	0.361	2.426	0.422	7.65	3.265	47.7	19.01	101.7	28.27	288	67	0.92	9.77	52.6	667	9940	0.522	0.294	4.16	1	1	568.46	3.0169	61.463	503.98	167.052	1.77551	0.185741	669.672
718	0.0116	3.82	0.066	0.76	4.31	0.597	12.1	4.85	64.9	25.9	129	33.4	332	73.1	1.134	15.1	65.1	879	10540	0.726	0.395	3.62	1	1	684.815	4.6576	86.757	593.4	127.405	1.83797	0.231951	658.624
719	1.18	4.56	0.257	1.1	2.93	0.348	7.34	3.13	44.8	18.9	94.3	25.4	266	57.1	1.187	16.6	68	666	11840	1.046	0.646	21.4	1	1	527.345	7.097	58.548	461.7	65.0557	1.6192	0.244118	822.744
720	0.0306	4.11	0.047	0.556	3.03	0.435	8.82	3.73	55.1	22.77	116.9	31.2	312	71.3	1.406	19.29	79.6	791	10660	0.924	0.53	4.34	1	1	630.029	4.7436	71.115	554.17	116.825	1.7434	0.242337	673.091
721	0.0202	4.21	0.133	1.391	6.83	0.997	16.6	6.18	80.6	31.3	151.6	39.9	375	84.7	1.364	23.59	80.5	1077	10410	0.583	0.335	3.82	1	1	799.461	5.7542	111.207	682.5	118.609	1.7403	0.293043	662.867
722	0.353	4.42	0.1034	0.759	3.64	0.478	10.82	4.6	67.4	27.6	139.5	36.7	362	82.4	1.469	18.8	85	925	10980	0.884	0.513	3.74	1	1	740.773	5.6354	86.938	648.2	115.023	1.7232	0.221176	661.192
723	0.166	6.67	0.07	0.66	3.62	0.434	11.02	4.74	70.1	30.17	147.1	39.8	396	90.3	1.989	28.51	116.4	1002	11370	1.628	1.058	4.73	1	1	800.85	7.566	89.914	703.37	92.9646	1.53875	0.244931	680.111
724	0.0161	7.38	0.0867	0.982	5.32	0.941	16.86	7.42	111.3	46.1	233.8	60.8	589	133.9	2.152	34.9	126.9	1557	9500	1.554	0.792	8.64	1	1	1213.91	8.4648	141.841	1063.6	125.65	1.96212	0.27502	732.344
725	0.0115	8.41	0.0845	0.915	5.32	0.944	17.65	8.08	124.7	54	269.2	73.4	686	157.1	2.616	39.7	150.3	1800	8980	1.887	1.007	9.06	1	1	1405.82	9.421	156.694	1239.7	131.589	1.87388	0.264138	736.703
726	4.4	9.97	0.66	2.14	5.01	0.561	14.56	6.16	88.6	36.1	185	50.1	460	104.9	2.837	49.9	158.7	1235	10770	1.6	1.209	4.16	1	1	968.161	17.17	114.891	836.1	48.6954	1.32341	0.31443	669.672
727	0.0218	10.69	0.114	1.136	7.1	1.81	20.2	7.84	109.9	44.8	227	60.4	535	130	0.989	20.1	59.9	1500	8040	1.94	1.2	9.66	1	1	1156.01	11.9618	146.85	997.2	83.3654	1.61667	0.335559	742.653
728	0.86	12.94	0.177	1.472	9.37	2.461	26.82	10.01	132.1	51.4	252.7	64	554	136.4	1.132	30.7	68.8	1694	8030	2.09	1.324	25.1	1	1	1254.71	15.449	180.761	1058.5	68.5158	1.57855	0.446221	840.346
729	0.36	14.9	0.301	2.59	14.5	3.33	34.6	12.28	157	61.6	300	77.3	678	163.8	1.447	39	85.4	1980	8140	1.913	1.161	12.5	1	1	1520.56	18.151	221.71	1280.7	70.5581	1.64772	0.456674	767.292
730	0.0358	9.6	0.155	1.55	9.4	2.13	23.1	8.6	115	46.1	236	62.5	555	142	1.44	35.2	86.7	1520	8280	1.34	1.1	7.51	1	1	1211.17	11.3408	158.23	1041.6	91.8454	1.21818	0.405998	719.687
731	0.03	9.63	0.1509	1.474	9.08	2.111	22.17	8.22	111.7	45.1	233.2	62.3	568	136.9	1.425	34.2	87.2	1502	7790	1.273	0.938	7.77	1	1	1210.07	11.2849	153.281	1045.5	92.6459	1.35714	0.392202	722.731
732	0.0248	11.85	0.1279	1.27	7.63	1.75	20.5	7.96	110.6	46.4	237	61.6	561	138.8	1.64	35.5	100.8	1557	8200	2.6	1.715	9.52	1	1	1206.51	13.2727	148.44	1044.8	78.718	1.51603	0.352183	741.292
733	0.0329	22	0.152	1.44	9.9	2.53	29.4	11.6	160	65.3	318	83	780	167	1.89	42.5	120	2120	8620	4.15	2.03	8.4	1	1	1650.35	23.6249	213.43	1413.3	59.8225	2.04433	0.354167	729.774
734	0.0317	19.06	0.187	1.79	11.57	2.8	33.4	13.18	181.8	73.2	365	94	825	195	2.25	40.9	130	2370	8900	4.17	2.67	11.99	1	1	1816.02	21.0687	242.75	1552.2	73.6733	1.5618	0.314615	763.229
735	48	18.3	2.6	6.6	9.2	1.75	19.5	7.37	101.3	40.7	208	53.2	468	111.1	2.67	51.7	135	1360	7730	3.03	1.41	120	1	1	1095.62	75.5	139.12	881	11.6689	2.14894	0.382963	1048.65
736	0.0379	16.6	0.205	1.973	15.48	4.18	40.2	14.02	180.5	70.4	334	85	751	179.4	2.42	80	147.1	2242	7290	2.297	1.5	13.62	1	1	1693	18.8159	254.38	1419.8	75.4575	1.53133	0.543848	775.762
737	0.235	11.49	0.458	3.55	17	3.88	35.4	12.2	153	59.4	292	77	692	175	2.64	86.9	164.9	2010	7720	1.7	1.233	8.45	1	1	1532.61	15.733	221.48	1295.4	82.3365	1.37875	0.526986	730.314
738	0.037	8.38	0.1014	0.877	4.98	0.935	12.25	4.98	72.1	31.1	163.1	45.4	421	100.1	2.75	47.8	167	1048	8640	2.13	1.7	10.01	1	1	865.34	9.3954	95.245	760.7	80.9652	1.25294	0.286228	745.986
739	0.077	9	0.111	0.84	4.76	1.31	13.5	5.29	73	30.8	155	41.6	390	101	3.29	70	191	1000	10730	1.73	2.63	3.04	1	1	826.288	10.028	97.86	718.4	71.6394	0.657795	0.366492	645.111
740	0.035	11.9	0.0848	0.833	6.03	1.002	17.8	7.41	110	46.8	244	66.6	596	143	4.52	66	282	1570	9540	5.25	3.14	6.5	1	1	1251.49	12.8528	142.242	1096.4	85.3044	1.67197	0.234043	706.974
741	0.0279	13.02	0.1067	1.095	7.52	1.299	22.3	9.31	133.4	56.6	292	78.5	702	172	4.78	76.2	290	1905	9920	5.22	3.47	5.21	1	1	1489.18	14.2496	173.829	1301.1	91.3078	1.50432	0.262759	688.122
742	0.262	28.7	0.693	5.79	27.7	6.03	57.2	19.7	249	100	494	134	1190	300	5.09	150	311	3420	8770	3.65	2.15	6.5	1	1	2613.07	35.445	359.63	2218	62.5758	1.69767	0.482315	706.974
743	0.56	19.7	0.181	1.069	6.98	1.076	23	10.04	150	65.7	322	86.6	742	167.9	10.8	169	619	2140	11450	8.2	6.91	2.53	1	1	1596.81	21.51	191.096	1384.2	64.3515	1.18669	0.273021	631.316
744	0.92	35.8	0.218	1.62	12.68	1.784	40.7	17.09	242	98.5	469	122.4	1025	227	22.48	479	1336	3100	11600	14.95	11.77	2.92	1	1	2294.71	38.558	314.254	1941.9	50.3631	1.27018	0.358533	642.05
745	0.0332	15.2	0.113	0.82	5.16	0.86	9.29	4.04	56.4	18.6	99.9	30.6	302	68.8	9.4	81.8	335	692	10700	1.68	1.44	3.11	1	1	611.816	16.1662	75.75	519.9	32.1597	1.16667	0.244179	646.85
746	0.091	13.72	0.0537	0.416	3.32	0.639	7.72	3.51	52.2	18.8	104.3	32	329	77.8	16	91.2	467	697	11730	2.29	1.327	2.51	1	1	643.57	14.2807	67.389	561.9	39.3468	1.7257	0.195289	630.729
747	0.205	21.9	0.233	1.31	8.9	1.27	13.1	6.11	80.6	24.8	126.9	37.1	358	81.3	8	153	474	886	10080	2.35	1.77	4.43	1	1	761.728	23.648	109.98	628.1	26.5604	1.32768	0.322785	674.756
748	0.307	14.32	0.0808	0.844	3.94	0.524	15.87	4.98	71.5	32.4	163.4	44.5	387	90.5	24	114.4	488	1074	11560	4.23	6.28	10.5	1	1	830.166	15.5518	96.814	717.8	46.1554	0.673567	0.234426	750.495
749	0.0186	6.83	0.0216	0.157	1.96	0.351	3.79	2.34	38.4	12.4	73.6	23.2	255	65.5	5.6	63	544	503	12030	2.06	1.32	1.49	1	1	483.568	7.0272	46.841	429.7	61.1481	1.56061	0.115809	593.768
750	0.125	24.9	0.205	1.5	9.3	1.57	17.2	7.1	93	31.9	167	48.7	457	103.7	16.3	169	566	1150	10260	2.59	1.84	3.54	1	1	963.2	26.73	128.17	808.3	30.2394	1.40761	0.298587	656.873
751	0.023	22.18	0.0867	0.727	5.62	0.996	11.14	4.68	64.4	21.88	116.7	33.8	328	75.7	9	179	599	795	11100	3.21	2.076	3.21	1	1	685.933	23.0167	86.836	576.08	25.0288	1.54624	0.298831	649.28
752	0.265	27.1	0.246	1.34	11	1.5	15.9	7.8	106.1	31.6	164	46.4	447	100.3	7.7	175	627	1133	10410	3.07	1.96	4.31	1	1	960.551	28.951	142.3	789.3	27.2633	1.56633	0.279107	672.529
753	0.107	23.6	0.19	2.06	8.17	2.12	24.3	6.88	91.4	41.9	211.6	58.9	530	130.9	7	206	628	1425	10290	2.215	1.389	3.38	1	1	1132.13	25.957	132.87	973.3	37.4966	1.59467	0.328025	653.268
754	0.023	32.2	0.1267	0.778	7.7	1.034	11.51	6.07	82.6	24.8	131.2	36.5	359	78.7	10.1	229	672	920	10410	3.88	3.01	4.63	1	1	772.242	33.1277	108.914	630.2	19.0234	1.28904	0.340774	678.358
755	0.0123	22.6	0.0637	0.617	4.98	1.02	12.8	5.43	79.6	29.9	157.5	44.6	429	101.4	8.6	182	711	1080	11230	3.79	2.146	2.82	1	1	889.523	23.293	103.83	762.4	32.7309	1.76608	0.255977	639.417
756	8.3	20.7	2	7.3	22.1	0.77	34.7	14.88	194.8	61.4	289	73.1	590	117.6	16.2	135.3	759	2011	12250	11.43	40.9	6.5	1	1	1436.65	38.3	267.25	1131.1	29.5326	0.279462	0.178261	706.974
757	0.057	30.3	0.0801	0.931	5.88	1.506	17.9	5.97	83.1	34.9	178.3	48	437	105.9	10	341	891	1231	10810	4.12	2.47	3.06	1	1	949.824	31.3681	114.356	804.1	25.6343	1.66802	0.382716	645.611
758	0.228	38.4	0.214	2.16	9.41	2.55	29.8	8.21	109.7	47.7	251.7	66.2	580	143	20	487	937	1655	10860	4.1	2.53	5.14	1	1	1289.27	41.002	159.67	1088.6	26.5499	1.62055	0.519744	686.993
759	1.08	31.9	0.235	1.16	7.8	1.804	21.37	9.01	130.7	51.6	265	74.2	670	158	11.4	256	1069	1857	10730	6.76	3.336	4.52	1	1	1423.86	34.375	170.684	1218.8	35.456	2.02638	0.239476	676.393
760	0.187	41.6	0.172	1.469	11.03	2.105	23.63	9.31	120.5	42.6	207	56.3	515	113.9	2.8	483	1157	1488	10750	6.29	3.33	4.82	1	1	1144.8	43.428	166.575	934.8	21.5253	1.88889	0.417459	681.663
761	0.0325	23.8	0.126	1.09	8.03	1.93	17.9	7.34	101	36.1	192.2	54.4	519	123.4	15.3	229	1180	1385	10070	4.38	1.954	6.85	1	1	1086.35	25.0485	136.2	925.1	36.9324	2.24156	0.194068	711.553
762	0.049	27.5	0.0823	0.787	6.75	1.98	18.2	7.82	119.5	49.3	271.7	80.3	775	192.4	19.1	259	1193	1880	10370	5.8	2.37	5.89	1	1	1551.37	28.4183	154.25	1368.7	48.1626	2.44726	0.2171	698.486
763	0.121	10.11	0.325	2.63	15.17	1.245	36.4	14.51	191.8	71.1	322	76.4	612	130.6	11	86.7	195	2190	8650	1.62	1.45	18.9	1	1	1484.41	13.186	259.125	1212.1	91.9233	1.11724	0.444615	809.413
764	6.2	17.7	0.9	6.14	28.3	2.18	67.9	23.5	296	115.3	503	113.6	877	169.3	15	155	309	3430	9180	1.69	1.54	13.37	1	1	2227.02	30.94	417.88	1778.2	57.4725	1.0974	0.501618	773.922
765	29	26.5	2.5	6.9	14.6	1.01	37.9	13.47	177	69.6	319	73.9	598	129.3	280	212	354	2170	10150	4.39	2.97	57	1	1	1498.68	64.9	243.98	1189.8	18.3328	1.47811	0.59887	940.615
766	0.0156	8.33	0.0587	0.494	2.607	0.288	5.91	2.071	26.15	10.04	49.1	12.21	117.9	22.32	1.872	35.3	79.5	305	9540	0.958	0.885	21.91	1	1	257.494	8.8983	37.026	211.57	23.7765	1.08249	0.444025	825.308
767	0.0142	8.59	0.0557	0.48	2.561	0.288	5.57	2.042	26.69	10.09	52.8	12.47	123.1	22.93	1.946	36.5	83.8	296.2	9860	0.916	0.864	20.3	1	1	267.681	9.1399	37.151	221.39	24.2224	1.06019	0.435561	817.041
768	0.83	10.16	0.176	0.82	3.7	0.405	8.7	2.82	35.1	13.7	58.9	15.4	149	32.4	2.27	43.8	96.8	403	9290	0.85	0.645	29	1	1	332.111	11.986	50.725	269.4	22.4762	1.31783	0.452479	856.783
769	0.0135	11	0.0525	0.48	2.81	0.274	6.64	2.38	31.2	12.23	60.6	14.94	147.3	28.7	2.91	52	127.3	376	10760	1.28	1.247	14.63	1	1	318.62	11.546	43.304	263.77	22.8451	1.02646	0.408484	782.93
770	0.02	13.77	0.187	1.26	7.12	0.871	13.43	4.99	60.2	21.41	120.9	26.11	198.1	38.4	3.224	102.3	137	665	9380	1.115	0.811	28.5	1	1	506.768	15.237	86.611	404.92	26.5748	1.37485	0.746715	854.778
771	0.0114	11.46	0.0647	0.544	3.096	0.3154	6.9	2.669	36	13.71	72.8	17.83	163.8	31.3	3.3	60.9	139.8	427	10920	1.366	1.455	13.71	1	1	360.5	12.0801	48.9804	299.44	24.7879	0.938832	0.435622	776.418
772	0.0162	12.34	0.1156	0.823	5.13	0.558	12.09	4.49	59.7	22.7	112.9	28.1	235.6	50.5	3.31	69.1	142.9	687	10840	1.045	1.142	15.66	1	1	545.063	13.2948	81.968	449.8	33.8328	0.915061	0.483555	789.839
773	0.0141	10.57	0.0556	0.471	2.592	0.2646	6.28	2.326	31.4	12.34	64.3	16.36	160.1	31.5	3.41	48.5	145.6	388	11630	1.45	1.805	12.97	1	1	338.573	11.1107	42.8626	284.6	25.6149	0.803324	0.333104	770.919
774	0.0156	13.92	0.1509	1.158	6.69	0.763	15.82	5.61	71.3	26.8	134.5	31.5	252.8	55.8	3.49	94.1	149.5	822	10110	1.263	1.16	19.72	1	1	616.827	15.2445	100.183	501.4	32.8906	1.08879	0.629431	813.934
775	0.184	13.64	0.652	4.21	15.55	1.431	24.73	7.48	84	29.6	132.9	30.67	249.6	49.9	3.63	102	153.7	907	9260	0.842	0.801	22.3	1	1	644.547	18.686	133.191	492.67	26.3657	1.05119	0.66363	827.237
776	0.0159	16.93	0.1185	1.044	6.45	0.683	16.63	5.56	71	27.04	122.2	31	264.9	61.9	4.75	106	205.6	855	10670	1.426	1.362	16.95	1	1	625.471	18.1084	100.323	507.04	28.0003	1.04699	0.515564	797.991
777	0.0172	14.14	0.1087	0.815	4.95	0.504	11.72	4.42	60.2	23.56	121.1	30.4	266	56.5	4.92	87.3	210	741	11590	1.589	1.853	12.61	1	1	594.435	15.0809	81.794	497.56	32.9927	0.857528	0.415714	768.15
778	0.0175	15.3	0.097	0.806	4.83	0.465	9.79	3.66	47.5	17.8	96.7	22.4	198	36.5	4.92	110	211	562	10530	1.52	1.5	14.7	1	1	453.865	16.2205	66.245	371.4	22.897	1.01333	0.521327	783.412
779	0.0137	17.19	0.153	1.067	7.25	0.799	17.73	6.46	84.9	31.9	162.1	38.9	295	69.4	5.06	125.2	217	1003	10590	1.407	1.38	14.97	1	1	732.863	18.4237	117.139	597.3	32.4202	1.01957	0.576959	785.253
780	0.861	18.86	0.391	1.942	12.25	1.409	27.43	9.71	117.7	42.3	206.5	47.9	328	81.5	5.18	169	221	1366	10300	1.291	1.119	20.18	1	1	896.753	22.054	168.499	706.2	32.0214	1.15371	0.764706	816.404
781	0.0385	18.08	0.253	2.25	12.34	1.083	22.93	7.45	88	31.3	147.1	33.8	284	55.1	5.78	156.8	249	966	11170	1.21	1.429	13.38	1	1	703.725	20.6215	131.803	551.3	26.7342	0.846746	0.629719	773.996
782	0.0127	17.12	0.0719	0.676	4.52	0.417	10.88	3.947	52.9	20.77	101.1	25.22	231.4	47.7	5.9	120.4	255	654	11600	2.095	2.49	10.26	1	1	516.735	17.8806	72.664	426.19	23.8353	0.841365	0.472157	748.309
783	0.0137	20.59	0.1313	1.152	8.33	0.781	22.27	7.7	101.2	39	180.5	45.9	376	94.2	6.85	164.5	290	1322	11610	2.058	2.363	10.94	1	1	897.768	21.887	140.281	735.6	33.609	0.870927	0.567241	754.401
784	0.0172	21.54	0.148	1.222	8.59	0.889	23.11	7.94	99.5	38.4	165.1	43.8	335.6	86.1	6.85	169	294	1217	11100	1.636	1.613	13.99	1	1	831.956	22.9272	140.029	669	29.1793	1.01426	0.57483	778.437
785	0.0174	26.5	0.327	2.58	21.8	2.37	63.1	21.39	258.8	95.6	410	98.7	653	175	9.21	331	390	3120	11140	1.299	1.376	12.23	1	1	1829.18	29.4244	367.46	1432.3	48.6773	0.944041	0.848718	765.158
786	0.0033	2.68	0.0232	0.281	1.33	0.308	2.81	0.872	9.49	3.41	14.84	3.55	54.4	7.69	0.2218	4.52	18.63	109.5	10160	0.28	0.027	3.89	1	1	101.688	2.9875	14.81	83.89	28.0803	10.3704	0.242619	664.308
787	0.047	3.26	0.0228	0.251	1.148	0.265	2.41	0.782	9.19	3.34	15.24	3.82	56.4	8.35	0.315	6.06	25.07	105.1	10000	0.328	0.065	4.64	1	1	104.526	3.5808	13.795	87.15	24.3381	5.04615	0.241723	678.535
788	0.0108	4.02	0.083	0.828	4.25	0.906	7.55	2.18	22.3	7.28	30.8	7.13	81.3	14.22	0.299	9.19	25.21	227	9570	0.315	0.066	4.96	1	1	182.858	4.9418	37.186	140.73	28.4775	4.77273	0.364538	684.03
789	0.0274	3.89	0.095	0.84	3.23	0.713	6.19	1.93	20.9	7.51	32.4	7.94	88.9	16.9	0.35	8.7	29.1	234	8920	0.331	0.092	5.47	1	1	191.465	4.8524	32.963	153.65	31.6647	3.59783	0.298969	692.21
790	0.0081	3.82	0.0464	0.533	2.466	0.547	5.04	1.624	18.37	6.85	30.5	7.49	86.9	16.19	0.351	7.47	29.2	219.8	8650	0.338	0.12	5.8	1	1	180.385	4.4075	28.047	147.93	33.5632	2.81667	0.255822	697.173
791	0.0143	3.66	0.0731	0.64	2.43	0.508	4.34	1.318	14.09	4.98	22	5.28	69.7	11.84	0.354	7.75	29.6	164.1	10080	0.341	0.129	4.89	1	1	140.873	4.3874	22.686	113.8	25.9379	2.64341	0.261824	682.853
792	0.286	5.3	0.249	2.12	8.62	1.677	12.67	3.47	34.1	11.6	45.8	10.47	107.4	20.08	0.452	15.87	38.4	328	9450	0.358	0.122	5.52	1	1	263.842	7.955	60.537	195.35	24.5569	2.93443	0.413281	692.977
793	0.0128	5.06	0.0746	0.768	3.58	0.756	6.82	2.226	26.2	10.28	46.6	11.83	125.5	26.4	0.522	11.22	44	334	8970	0.478	0.247	7.35	1	1	266.107	5.9154	39.582	220.61	37.2942	1.93522	0.255	717.771
794	0.082	5.96	0.272	2.14	6.77	1.37	10.9	3.11	32.4	10.96	44.9	10.59	109.9	21	0.542	18	45.5	354	8410	0.416	0.14	6.39	1	1	260.354	8.454	54.55	197.35	23.344	2.97143	0.395604	705.494
795	0.016	5.24	0.0729	0.707	3.65	0.775	6.85	2.221	27.1	10.32	48.5	11.87	131.2	28.2	0.569	11.54	47	328	9340	0.495	0.236	6.71	1	1	276.722	6.0359	40.596	230.09	38.1202	2.09746	0.245532	709.745
796	0.0632	5.84	0.229	1.829	6.62	1.368	11.69	3.5	36.8	12.94	54.9	12.79	131.9	26.3	0.56	18.58	47	410	8710	0.402	0.164	7.19	1	1	306.769	7.9612	59.978	238.83	29.9992	2.45122	0.395319	715.82
797	0.0156	5.6	0.0883	0.822	3.64	0.814	7.71	2.62	31.2	11.94	53.6	13.17	134.9	28.6	0.583	14.19	48.1	387	8540	0.486	0.216	8	1	1	294.72	6.5259	45.984	242.21	37.1152	2.25	0.29501	725.355
798	0.0106	5.1	0.0624	0.665	2.878	0.618	5.38	1.709	20.41	7.74	36.6	9.19	105.5	20.58	0.663	12.74	55.9	259.8	9250	0.474	0.214	6.07	1	1	216.443	5.838	30.995	179.61	30.7657	2.21495	0.227907	701.063
799	0.115	6.85	0.399	3.01	9.29	1.93	15.7	4.44	44	14.9	58.6	13.18	130.7	25.2	0.693	31.1	57.3	480	8570	0.449	0.161	6.76	1	1	328.314	10.374	75.36	242.58	23.3835	2.78882	0.542757	710.394
800	0.0294	6.03	0.0891	0.813	4.03	0.866	7.62	2.57	32.5	12.39	57.4	14.68	151	33	0.693	14.19	57.7	393	8890	0.529	0.292	8.44	1	1	323.017	6.9615	47.586	268.47	38.565	1.81164	0.245927	730.207
801	0.0169	6.25	0.099	0.92	3.67	0.828	7.66	2.593	30.3	11.7	53	12.92	134.6	27.02	0.701	17.61	58.1	391	8380	0.533	0.268	8.73	1	1	291.577	7.2859	45.051	239.24	32.836	1.98881	0.303098	733.292
802	0.0011	3.67	0.0081	0.1089	0.552	0.1582	1.467	0.543	6.95	2.73	13.38	3.84	69.4	9.44	0.748	9.62	62.6	90.6	14220	0.336	0.336	1.09	1	1	112.248	3.7881	9.6702	98.79	26.079	1	0.153674	573.028
803	0.125	7.68	0.415	2.95	9.68	1.94	16.11	4.67	48.9	17.17	71.6	16.79	161.7	33.2	0.806	26.2	67.8	559	8690	0.512	0.24	7.62	1	1	392.93	11.17	81.3	300.46	26.8988	2.13333	0.386431	720.985
804	0.0227	7.35	0.1147	1.007	4.46	0.951	8.88	3.2	41.8	16.62	75.9	18.53	181.6	40	0.849	19.6	70.4	549	8790	0.664	0.344	8.95	1	1	400.435	8.4944	59.291	332.65	39.1611	1.93023	0.278409	735.578
805	0.126	16.7	0.408	3.17	12.08	2.786	28.9	9.25	99.7	34.3	137.4	30.5	269.7	53.6	1.856	93.9	154.1	1130	8000	0.991	0.451	13.29	1	1	698.62	20.404	152.716	525.5	25.7548	2.19734	0.609345	773.327
806	0.0137	7.99	0.084	0.8	3.98	0.431	9.2	3.38	42.6	16.1	76.1	18.4	174	32.9	0.783	23.2	54.5	516	10300	0.547	0.359	11.88	1	1	385.979	8.8877	59.591	317.5	35.7235	1.52368	0.425688	762.334
807	0.0077	6.58	0.0254	0.298	1.534	0.191	3.79	1.465	20.31	7.96	40.6	11.12	129.1	23.13	0.777	18.37	56.7	262	11910	0.528	0.402	6.99	1	1	246.111	6.9111	27.29	211.91	30.6623	1.31343	0.323986	713.331
808	0.0093	7.8	0.0504	0.49	2.77	0.325	6.26	2.319	32.58	12.74	61.8	16.28	163.7	33	0.93	22.9	64.9	397	10970	0.576	0.43	8.34	1	1	340.124	8.3497	44.254	287.52	34.4348	1.33953	0.352851	729.122
809	0.0218	9.71	0.226	1.98	9.4	0.95	17.3	5.6	66	24.2	106	24.5	209	40.9	0.974	38.6	70	725	10020	0.515	0.337	12.4	1	1	515.788	11.9378	99.25	404.6	33.8923	1.52819	0.551429	766.506
810	0.0152	8.5	0.1168	1.072	5.82	0.593	11.69	3.87	48.5	18.8	87.4	21.49	195.6	41.7	1.002	27.41	71.3	577	9460	0.695	0.577	13.98	1	1	445.167	9.704	70.473	364.99	37.6123	1.20451	0.384432	778.365
811	0.0068	7.4	0.0415	0.398	1.956	0.264	4.79	1.909	25.4	10.29	54.6	15.15	169.3	32.7	1.245	28.37	88.5	351	12180	0.601	0.501	5.85	1	1	324.205	7.8463	34.319	282.04	35.9456	1.1996	0.320565	697.904
812	0.038	11.63	0.403	3.53	15.65	1.504	26.19	7.9	91.7	32.9	141.1	32.5	263.5	52	1.248	54.7	88.7	1000	9620	0.518	0.342	13.05	1	1	680.545	15.601	142.944	522	33.4594	1.51462	0.616685	771.525
813	0.029	12.66	0.391	3.46	15.74	1.562	28.5	9.21	101.3	35.2	153.1	34.6	282.3	54.2	1.262	58.7	88.9	1109	9950	0.492	0.287	13.72	1	1	732.252	16.54	156.312	559.4	33.821	1.71429	0.660292	776.491
814	0.0121	9.98	0.087	0.832	4.34	0.506	8.8	2.94	37.5	14.28	68.7	17.9	174.3	34.3	1.251	40	90.5	460	11060	0.67	0.555	7.96	1	1	374.477	10.9111	54.086	309.48	28.3638	1.20721	0.441989	724.903
815	0.0485	12.32	0.521	4.18	16.52	1.625	28.2	9.16	99	35.1	154.3	35.6	288.1	54.6	1.292	58.3	91.8	1122	9350	0.514	0.322	13.38	1	1	739.274	17.0695	154.505	567.7	33.2582	1.59627	0.635076	773.996
816	0.042	11.93	0.341	2.63	11.9	1.26	22	7.01	81.5	30.3	131.4	31	259	52.1	1.39	57.6	98.9	936	9800	0.492	0.339	11.34	1	1	642.413	14.943	123.67	503.8	33.7148	1.45133	0.582406	757.842
817	0.056	11.56	0.322	2.58	11.4	1.14	23.1	7.86	90.7	34.2	157	35.6	299	59	1.45	69	102	1120	9430	0.566	0.435	13.13	1	1	733.518	14.518	134.2	584.8	40.281	1.30115	0.676471	772.129
818	0.0069	8.37	0.0493	0.509	2.514	0.329	6.11	2.415	32.4	12.91	67.1	18.7	198.5	40.9	1.46	34	103.2	432	12120	0.65	0.543	6.08	1	1	390.813	8.9352	43.768	338.11	37.8402	1.19705	0.329457	701.205
819	0.0098	8.75	0.0427	0.473	2.63	0.372	6.38	2.42	31.2	11.94	62.8	16.67	181.7	34.9	1.479	46.2	104.1	407	11780	0.693	0.618	6.09	1	1	360.288	9.2755	43.002	308.01	33.2068	1.12136	0.443804	701.346
820	0.056	11.79	0.434	3.28	14	1.39	25.5	8.37	100	37.4	159	37.2	293	59	1.5	73	108	1110	9150	0.61	0.343	16.24	1	1	750.42	15.56	149.26	585.6	37.635	1.77843	0.675926	793.569
821	1.75	14.78	1.11	6.05	19.34	1.838	31.26	9.99	112	41.4	180.2	40.7	337.8	65.5	1.667	77.1	116.6	1259	9550	0.546	0.383	13.88	1	1	863.718	23.69	174.428	665.6	28.0962	1.42559	0.661235	777.648
822	0.1075	12.85	0.611	4.38	17.44	1.626	28.81	9.04	110.9	40.9	177.6	40.6	331	68.2	1.653	72.8	118.5	1278	9490	0.639	0.445	13.34	1	1	844.064	17.9485	167.816	658.3	36.6772	1.43596	0.614346	773.699
823	0.0318	13.37	0.385	3.33	13.76	1.446	23.54	7.66	85.5	29.94	141.7	34.5	301.8	61.1	1.939	80.4	136.2	1023	10660	0.555	0.418	7.97	1	1	718.063	17.1168	131.906	569.04	33.2445	1.32775	0.590308	725.016
824	0.008	8.66	0.0283	0.305	1.642	0.26	3.76	1.396	18.9	7.6	39.4	11.28	133.4	26.5	2	48.8	141.4	244	12350	0.627	0.494	5.66	1	1	253.139	9.0013	25.958	218.18	24.2387	1.26923	0.34512	695.096
825	0.0085	9.87	0.0234	0.246	1.222	0.295	2.89	1.083	15.58	6.57	34.9	10.37	133.6	27.2	4.08	84.7	284	216	13750	0.626	0.822	2.75	1	1	243.858	10.1479	21.07	212.64	20.9541	0.761557	0.298239	637.528
826	0.093	4.44	0.0452	0.407	2.41	0.446	5.98	2.18	29	11.51	56.5	14.9	148.7	32.3	0.614	14.6	48	359	9690	0.465	0.302	7.7	1	1	308.911	4.9852	40.016	263.91	52.9387	1.53974	0.304167	721.92
827	0.066	3.71	0.0305	0.306	1.77	0.347	4.43	1.61	20.7	8.27	41.4	11.2	123	26	0.663	13.21	52.5	261	11480	0.425	0.291	5.23	1	1	242.839	4.1125	28.857	209.87	51.0322	1.46048	0.251619	688.442
828	0.0089	4.59	0.0392	0.442	2.69	0.515	6.49	2.46	32.3	12.82	63.9	17.5	179	41.2	0.819	16.8	63.8	399	10420	0.489	0.324	5.63	1	1	363.955	5.0801	44.455	314.42	61.8925	1.50926	0.263323	694.646
829	0.0305	5.3	0.177	1.62	7.73	1.335	14.76	4.72	52.2	19.1	87.4	20.7	193.6	41.7	0.873	29.2	66.3	616	10040	0.396	0.209	6.24	1	1	450.373	7.1275	80.745	362.5	50.8593	1.89474	0.440422	703.44
830	0.0047	5.04	0.0465	0.49	3	0.555	7.32	2.62	35.2	13.74	71.1	18.5	186.7	43.3	0.929	20.22	70.4	429	10130	0.551	0.393	6.14	1	1	387.616	5.5812	48.695	333.34	59.7255	1.40204	0.287216	702.049
831	0.01	5.05	0.0502	0.523	3.125	0.58	7.57	2.648	34.4	13.95	71.3	19.48	196.4	46.7	0.922	19.45	72.8	454	9730	0.546	0.442	6.26	1	1	401.786	5.6332	48.323	347.83	61.7464	1.23529	0.26717	703.716
832	0.0224	4.92	0.131	1.075	5.08	0.929	10.58	3.58	43.6	16.6	81	20.2	189.5	43.9	0.977	28	74.8	529	8940	0.482	0.302	7.29	1	1	421.117	6.1484	63.769	351.2	57.1206	1.59603	0.374332	717.043
833	0.004	4.68	0.0309	0.355	2.15	0.417	5.52	2.03	27	10.58	53.4	14.72	161.3	36	1.08	20.9	83.7	336	11560	0.503	0.391	3.85	1	1	318.187	5.0699	37.117	276	54.4389	1.28645	0.249701	663.487
834	0.007	4.9	0.0353	0.388	2.49	0.482	6.21	2.27	29.6	12.17	62.9	17.42	180	42.5	1.117	21.64	85.3	392	10800	0.523	0.474	4.26	1	1	361.372	5.3303	41.052	314.99	59.0942	1.10338	0.253693	671.586
835	0.0064	5.7	0.063	0.628	3.6	0.651	8.48	3.04	41.2	16.32	84.1	22.9	225	52.6	1.181	25.6	91.4	553	10210	0.592	0.454	5.73	1	1	464.288	6.3974	56.971	400.92	62.6692	1.30396	0.280088	696.14
836	0.0067	5.2	0.0448	0.484	2.75	0.547	6.72	2.55	35.3	14.2	72.9	19.2	195	47	1.236	27.3	94.4	484	10270	0.61	0.423	5.9	1	1	401.902	5.7355	47.867	348.3	60.7271	1.44208	0.289195	698.631
837	0.0094	7.32	0.0828	0.803	4.53	0.824	10.87	4.07	54.2	22.7	113	29.3	270	65.8	1.31	31.4	99.6	747	9570	0.826	0.634	9.3	1	1	583.509	8.2152	74.494	500.8	60.9602	1.30284	0.315261	739.121
838	0.0069	5.05	0.0338	0.331	2.3	0.445	5.86	2.2	30	11.97	60.3	17	182.8	43.3	1.286	24.47	100.3	388	11500	0.539	0.445	3.64	1	1	361.597	5.4217	40.805	315.37	58.1681	1.21124	0.243968	659.057
839	0.0168	6.94	0.1176	1.025	5.29	0.954	11.58	4.15	54.4	22.1	109.9	28.6	260.7	61	1.347	35	103.5	731	9920	0.696	0.516	8.12	1	1	566.773	8.0994	76.374	482.3	59.5476	1.34884	0.338164	726.699
840	0.0114	6.81	0.0739	0.725	4.2	0.756	9.74	3.67	50.1	20.7	104.9	27.9	268	64.8	1.471	35	113.9	703	9360	0.755	0.592	7.95	1	1	562.386	7.6203	68.466	486.3	63.8164	1.27534	0.307287	724.79
841	0.0076	6.44	0.0218	0.264	1.72	0.357	4.85	1.92	26.6	10.83	58.2	16.7	188	43.3	1.81	31.3	140	368	13400	0.612	0.706	1.78	1	1	359.21	6.7334	35.447	317.03	47.0832	0.866856	0.223571	606.028
842	0.0249	9.18	0.1034	0.98	5.24	1.02	12.73	4.95	71.1	30.1	149.1	38.2	343	84.3	1.832	49.9	143.3	1023	8600	1.016	0.749	11.36	1	1	750.028	10.2883	95.04	644.7	62.6634	1.35648	0.348221	758.012
843	0.0056	5.95	0.0227	0.283	1.779	0.358	4.89	1.909	26.9	10.84	57.2	16.1	183.2	43.9	1.97	31.6	154	357	13540	0.564	0.633	2.28	1	1	353.337	6.2613	35.836	311.24	49.7085	0.890995	0.205195	623.683
844	0.0153	4.99	0.0477	0.53	3.55	0.52	10.13	4.16	60.2	25.2	141.3	38.9	366	91.6	4.33	48	153.1	903	8940	0.864	0.794	4.03	1	1	747.143	5.583	78.56	663	118.753	1.08816	0.313521	667.127
845	0.0105	7.7	0.0372	0.452	3.08	0.496	9.77	4.21	63.8	28	143	39.4	389	92.4	4.66	47.6	171	912	10200	1.68	1.61	4.27	1	1	781.356	8.1997	81.356	691.8	84.3689	1.04348	0.278363	671.775
846	0.013	7.51	0.0457	0.503	3.22	0.548	10.36	4.44	67.9	30	152.3	43.3	413	99.8	4.8	49.7	174.6	997	10270	1.705	1.633	4.58	1	1	832.94	8.0717	86.468	738.4	91.4801	1.04409	0.284651	677.47
847	0.0242	7.75	0.0462	0.502	3.37	0.544	10.29	4.16	62	25.96	135.9	36.9	367	86.6	4.88	60.9	176	882	10180	1.501	1.538	4.36	1	1	741.046	8.3224	80.364	652.36	78.386	0.975943	0.346023	673.463
848	0.0115	6.12	0.0421	0.478	2.609	0.443	8.07	3.29	48.3	20.24	108.9	29.65	282.2	66.5	5.13	60.3	185.8	696	9500	0.994	1.009	4.84	1	1	576.854	6.6516	62.712	507.49	76.2959	0.985134	0.324543	682.004
849	0.0155	9.46	0.0586	0.649	4.36	0.808	14.05	6.03	90.4	39.7	200.7	53.6	511	123.3	5.64	70.2	204.4	1320	9450	2.03	1.656	7.03	1	1	1054.13	10.1831	115.648	928.3	91.1608	1.22585	0.343444	713.833
850	0.94	7.81	0.142	0.67	3.09	0.516	9.28	3.698	55.3	23.3	116.9	31.7	308.8	70.9	5.85	86.6	209.9	772	9940	1.235	1.17	4.81	1	1	633.046	9.562	71.884	551.6	57.6867	1.05556	0.412577	681.492
851	0.0286	8.85	0.0501	0.552	3.23	0.587	10.31	4.31	63.9	28.34	143.8	39.2	378	93.9	5.93	88	211.9	909	10180	1.63	1.502	5	1	1	775.058	9.4807	82.337	683.24	72.0664	1.08522	0.41529	684.696
852	2.2	9.12	0.52	3.22	12.86	2.04	28.5	9.99	129.4	50	252	65.1	574	138.6	6.6	116.8	237.6	1695	8190	1.097	0.962	5.25	1	1	1277.55	15.06	182.79	1079.7	71.6932	1.14033	0.491582	688.762
853	0.086	8.85	0.0485	0.486	3.09	0.499	9.87	4.13	61	26.93	135.6	36.5	347.9	84.8	6.68	97.1	242	873	10720	1.709	1.604	5.27	1	1	719.789	9.4705	78.589	631.73	66.705	1.06546	0.40124	689.08
854	0.58	10.21	0.343	1.62	4.64	0.643	11.17	4.45	62.1	26.64	130.9	34.8	331	78.3	6.78	119.1	250.1	846	10440	1.616	1.523	6.3	1	1	697.396	12.753	83.003	601.64	47.1764	1.06106	0.47621	704.266
855	0.0162	9.76	0.0482	0.534	3.39	0.608	10.73	4.44	62.3	26.5	126.7	33.6	318	75.9	8	150.4	288	837	10370	1.48	1.448	4.51	1	1	672.526	10.3584	81.468	580.7	56.0608	1.0221	0.522222	676.212
856	0.1075	12.37	0.0613	0.616	4.21	0.646	14.22	6.04	90.9	38.6	196	54.4	512	120.5	8.3	90.3	306	1319	10850	2.72	2.66	6.5	1	1	1050.67	13.1548	116.016	921.5	70.0505	1.02256	0.295098	706.974
857	0.0839	9.83	0.0537	0.517	3.19	0.512	10.78	4.4	62.5	25.18	127.4	33.9	311.3	74.1	9.57	184	347	841	10010	1.541	1.544	4.42	1	1	663.747	10.4846	81.382	571.88	54.5448	0.998057	0.530259	674.572
858	0.074	14.44	0.0782	0.792	5.52	0.715	16.93	7.54	117.9	51.9	278	73.7	679	162.9	9.92	123.1	356	1727	9760	3.56	2.87	12.7	1	1	1409.49	15.3842	148.605	1245.5	80.9597	1.24042	0.345787	768.848
859	1.4	30.5	0.32	2.05	11.09	1.31	28.2	10.86	147.5	58.9	299	74.5	669	151.2	20.83	565	760	1935	9290	5.31	4.23	5.49	1	1	1485.83	34.27	198.96	1252.6	36.5509	1.25532	0.743421	692.517
860	0.0149	2.36	0.0191	0.237	1.39	0.157	3.13	1.323	19.5	8.11	43.5	11.78	136.7	27.9	0.73	10.2	36.2	272	11560	0.703	0.284	16.8	1	1	256.121	2.631	25.5	227.99	86.6553	2.47535	0.281768	797.069
861	0.0047	2.622	0.0292	0.36	2.545	0.422	7.65	3.265	47.7	19.01	101.8	28.27	288	67	0.92	9.77	52.6	667	9940	0.522	0.292	4.18	1	1	568.678	3.0159	61.582	504.08	167.141	1.78767	0.185741	670.058
862	0.0117	3.82	0.066	0.75	4.69	0.598	12.1	4.85	64.9	25.9	129	33.4	332	73.1	1.134	15.1	65.1	879	10540	0.726	0.393	3.65	1	1	685.186	4.6477	87.138	593.4	127.676	1.84733	0.231951	659.273
863	1.27	4.56	0.257	1.077	3.84	0.349	7.36	3.13	44.8	18.9	94.4	25.4	266	57.1	1.187	16.6	68	666	11840	1.046	0.645	21.4	1	1	528.443	7.164	59.479	461.8	64.4612	1.62171	0.244118	822.744
864	0.031	4.11	0.0471	0.548	3.62	0.435	8.83	3.73	55.1	22.77	117	31.2	311.9	71.3	1.406	19.29	79.6	791	10660	0.924	0.528	4.37	1	1	630.621	4.7361	71.715	554.17	117.01	1.75	0.242337	673.649
865	0.0205	4.21	0.1331	1.368	7.55	0.998	16.6	6.18	80.6	31.3	151.8	39.9	375	84.7	1.364	23.59	80.5	1077	10410	0.583	0.333	3.85	1	1	800.36	5.7316	111.928	682.7	119.112	1.75075	0.293043	663.487
866	0.373	4.42	0.1034	0.747	4.29	0.479	10.83	4.6	67.4	27.6	139.7	36.7	362	82.4	1.469	18.8	85	924	10980	0.884	0.511	3.76	1	1	741.642	5.6434	87.599	648.4	114.895	1.72994	0.221176	661.614
867	0.176	6.67	0.07	0.65	4.41	0.435	11.03	4.74	70.1	30.17	147.3	39.8	396	90.3	1.989	28.51	116.4	1001	11370	1.628	1.058	4.75	1	1	801.851	7.566	90.715	703.57	92.991	1.53875	0.244931	680.458
868	0.0132	6.3	0.0749	0.841	5.3	0.943	18.1	7.6	108.5	44	228.1	62.1	554	134.1	2.05	30.72	118.1	1519	9530	1.258	0.817	5.78	1	1	1169.97	7.2291	140.443	1022.3	141.415	1.53978	0.260119	696.879
869	0.0159	7.38	0.0868	0.966	6.18	0.943	16.87	7.42	111.3	46.1	234.1	60.8	589	133.9	2.151	34.9	126.9	1556	9500	1.554	0.791	8.67	1	1	1215.06	8.4487	142.713	1063.9	125.925	1.9646	0.27502	732.661
870	0.0111	7.32	0.0622	0.684	4.23	0.766	13.99	6.21	96.4	42	230	66.1	622	155.3	2.358	29.3	135.9	1524	9820	1.577	1.112	6.69	1	1	1245.07	8.0773	121.596	1115.4	138.091	1.41817	0.2156	709.484
871	0.0117	8.41	0.0846	0.902	5.67	0.945	17.64	8.08	124.7	54	269.6	73.4	686	157.1	2.616	39.7	150.3	1800	8980	1.887	1.006	9.09	1	1	1406.54	9.4083	157.035	1240.1	131.809	1.87575	0.264138	737.008
872	4.6	9.97	0.66	2.1	5.14	0.561	14.54	6.16	88.6	36.1	185	50.1	460	104.9	2.837	49.9	158.7	1235	10770	1.6	1.21	4.18	1	1	968.431	17.33	115.001	836.1	48.2458	1.32231	0.31443	670.058
873	0.88	11.23	0.167	0.9	5.19	0.539	18.43	7.86	110.9	43.3	213.8	57.2	509	113.4	3.62	65.5	204.2	1435	11540	1.931	1.679	3.9	1	1	1092.8	13.177	142.919	936.7	71.086	1.15009	0.320764	664.512
874	0.0033	2.68	0.0232	0.281	1.53	0.309	2.81	0.872	9.49	3.41	14.83	3.55	54.4	7.69	0.2212	4.51	18.63	109.6	10160	0.281	0.028	3.89	1	1	101.879	2.9875	15.011	83.88	28.077	10.0357	0.242083	664.308
875	0.0408	3.26	0.0228	0.25	1.249	0.265	2.41	0.782	9.19	3.34	15.23	3.82	56.4	8.35	0.316	6.06	25.07	105.1	10000	0.328	0.066	4.61	1	1	104.61	3.5736	13.896	87.14	24.3844	4.9697	0.241723	678.004
876	0.014	4.02	0.083	0.83	4.22	0.909	7.56	2.18	22.3	7.28	30.9	7.13	81.3	14.22	0.301	9.19	25.21	227	9570	0.315	0.067	4.91	1	1	182.946	4.947	37.169	140.83	28.4678	4.70149	0.364538	683.191
877	0.0231	3.89	0.095	0.84	3.68	0.715	6.19	1.93	20.9	7.51	32.4	7.94	88.9	16.9	0.349	8.7	29.1	234	8920	0.331	0.093	5.47	1	1	191.913	4.8481	33.415	153.65	31.6928	3.55914	0.298969	692.21
878	0.0075	3.82	0.0464	0.533	2.831	0.548	5.05	1.624	18.37	6.85	30.5	7.49	86.9	16.19	0.351	7.46	29.2	220	8650	0.339	0.12	5.8	1	1	180.76	4.4069	28.423	147.93	33.5678	2.825	0.255479	697.173
879	0.0119	3.66	0.0731	0.641	2.82	0.509	4.35	1.318	14.09	4.98	22	5.28	69.7	11.84	0.353	7.74	29.6	164.2	10080	0.342	0.129	4.9	1	1	141.273	4.386	23.087	113.8	25.9462	2.65116	0.261486	683.022
880	0.224	5.3	0.249	2.13	8.36	1.685	12.67	3.47	34.1	11.6	45.9	10.47	107.4	20.08	0.454	15.87	38.4	328	9450	0.359	0.123	5.46	1	1	263.638	7.903	60.285	195.45	24.7311	2.9187	0.413281	692.055
881	0.0143	5.05	0.0746	0.769	3.78	0.758	6.82	2.226	26.2	10.28	46.6	11.83	125.5	26.4	0.523	11.22	44	334	8970	0.478	0.248	7.32	1	1	266.302	5.9079	39.784	220.61	37.3415	1.92742	0.255	717.408
882	0.066	5.96	0.272	2.14	7.8	1.37	11	3.11	32.4	10.96	44.9	10.59	109.9	21	0.541	18	45.5	353	8410	0.416	0.14	6.39	1	1	261.468	8.438	55.68	197.35	23.3882	2.97143	0.395604	705.494
883	0.0182	5.24	0.0729	0.708	3.6	0.777	6.85	2.221	27.1	10.32	48.6	11.87	131.2	28.2	0.571	11.54	47	328	9340	0.495	0.237	6.66	1	1	276.777	6.0391	40.548	230.19	38.1166	2.08861	0.245532	709.092
884	0.0519	5.84	0.229	1.833	7.47	1.371	11.7	3.5	36.8	12.94	54.9	12.79	131.9	26.3	0.56	18.57	47	410	8710	0.402	0.164	7.19	1	1	307.625	7.9539	60.841	238.83	30.0268	2.45122	0.395106	715.82
885	0.0156	5.6	0.0883	0.824	3.94	0.816	7.72	2.62	31.2	11.94	53.6	13.17	134.9	28.6	0.583	14.19	48.1	387	8540	0.486	0.217	7.99	1	1	295.034	6.5279	46.296	242.21	37.1038	2.23963	0.29501	725.242
886	0.0074	5.1	0.0624	0.666	3.32	0.619	5.4	1.709	20.41	7.74	36.6	9.19	105.5	20.58	0.662	12.73	55.9	259.4	9250	0.475	0.213	6.07	1	1	216.904	5.8358	31.458	179.61	30.7773	2.23005	0.227728	701.063
887	0.093	6.85	0.399	3.01	10.89	1.93	15.8	4.44	44	14.9	58.7	13.18	130.7	25.2	0.692	31.1	57.3	479	8570	0.449	0.161	6.76	1	1	330.092	10.352	77.06	242.68	23.4428	2.78882	0.542757	710.394
888	0.0282	6.03	0.0892	0.815	3.9	0.869	7.62	2.57	32.5	12.39	57.4	14.68	151	33	0.695	14.19	57.7	393	8890	0.529	0.293	8.39	1	1	322.891	6.9624	47.459	268.47	38.56	1.80546	0.245927	729.666
889	0.0131	6.25	0.099	0.921	4.3	0.829	7.68	2.593	30.3	11.7	53.1	12.92	134.6	27.02	0.7	17.61	58.1	391	8380	0.533	0.268	8.73	1	1	292.325	7.2831	45.702	239.34	32.8624	1.98881	0.303098	733.292
890	0.0065	3.67	0.0081	0.1074	0.587	0.1578	1.466	0.543	6.95	2.73	13.37	3.84	69.4	9.44	0.749	9.62	62.6	90.6	14220	0.336	0.337	1.046	1	1	112.276	3.792	9.7038	98.78	26.0496	0.997033	0.153674	570.368
891	0.101	7.68	0.415	2.95	10.57	1.94	16.12	4.67	48.9	17.17	71.6	16.79	161.7	33.2	0.806	26.2	67.8	559	8690	0.512	0.24	7.61	1	1	393.806	11.146	82.2	300.46	26.9568	2.13333	0.386431	720.868
892	0.0223	7.35	0.1147	1.01	4.65	0.954	8.89	3.2	41.8	16.62	76	18.53	181.6	40	0.85	19.6	70.4	549	8790	0.664	0.344	8.93	1	1	400.741	8.497	59.494	332.75	39.1609	1.93023	0.278409	735.372
893	0.1018	16.7	0.408	3.17	14.11	2.792	29	9.25	99.7	34.3	137.5	30.5	269.7	53.6	1.855	94	154.1	1129	8000	0.991	0.451	13.29	1	1	700.832	20.3798	154.852	525.6	25.7902	2.19734	0.609994	773.327
894	0.0134	4.99	0.0477	0.535	3.17	0.522	10.17	4.16	60.2	25.2	140.9	38.9	366	91.6	4.33	48	153.1	903	8940	0.864	0.793	4.08	1	1	746.408	5.5861	78.222	662.6	118.616	1.08953	0.313521	668.114
895	0.0078	7.7	0.0372	0.457	3.12	0.498	9.78	4.21	63.8	28	142	39.4	389	92.4	4.66	47.6	171	912	10200	1.68	1.61	4.36	1	1	780.41	8.202	81.408	690.8	84.2234	1.04348	0.278363	673.463
896	0.0103	7.51	0.0457	0.509	3.25	0.55	10.39	4.44	67.9	30	152	43.3	413	99.8	4.8	49.7	174.6	997	10270	1.706	1.634	4.66	1	1	832.705	8.075	86.53	738.1	91.4056	1.04406	0.284651	678.887
897	0.0217	7.75	0.0462	0.508	3.41	0.546	10.31	4.16	62	25.96	135.6	36.9	367	86.6	4.88	60.9	176	882	10180	1.502	1.538	4.44	1	1	740.812	8.3259	80.426	652.06	78.3171	0.976593	0.346023	674.939
898	0.0089	6.12	0.0421	0.484	2.567	0.445	8.12	3.29	48.3	20.24	108.6	29.65	282.2	66.5	5.13	60.3	185.8	696	9500	0.994	1.009	4.92	1	1	576.567	6.655	62.722	507.19	76.2119	0.985134	0.324543	683.359
899	0.013	9.46	0.0586	0.656	4.49	0.812	14.05	6.03	90.4	39.7	200.3	53.6	511	123.3	5.64	70.2	204.4	1321	9450	2.031	1.656	7.11	1	1	1053.87	10.1876	115.782	927.9	91.0813	1.22645	0.343444	714.831
900	0.97	7.81	0.142	0.68	3.12	0.518	9.32	3.698	55.3	23.3	116.6	31.7	308.8	70.9	5.85	86.6	209.9	772	9940	1.235	1.171	4.9	1	1	632.858	9.602	71.956	551.3	57.4151	1.05465	0.412577	683.022
901	0.0263	8.85	0.0501	0.558	3.41	0.589	10.31	4.31	63.9	28.34	143.5	39.2	378	93.9	5.93	88	211.9	909	10180	1.631	1.503	5.07	1	1	774.943	9.4844	82.519	682.94	72.0067	1.08516	0.41529	685.851
902	12	12.6	1.21	4.3	12.7	1.9	30.2	10.5	139	54	264	69.7	612	152	6.46	100	231	1780	8610	1.75	1.19	190	1	1	1376.11	30.11	194.3	1151.7	38.2498	1.47059	0.4329	1125.5
903	2.3	9.12	0.52	3.25	11.79	2.05	28.7	9.99	129.4	50	251	65.1	574	138.6	6.6	116.7	237.6	1694	8190	1.097	0.962	5.31	1	1	1275.82	15.19	181.93	1078.7	71.0138	1.14033	0.491162	689.714
904	0.084	8.85	0.0485	0.491	3.2	0.5	9.87	4.13	61	26.93	135.3	36.5	347.9	84.8	6.68	97.1	242	873	10720	1.71	1.605	5.35	1	1	719.604	9.4735	78.7	631.43	66.6522	1.06542	0.40124	690.344
905	0.58	10.21	0.343	1.65	4.86	0.645	11.17	4.46	62.2	26.64	130.6	34.8	331	78.3	6.78	119.1	250.1	847	10440	1.617	1.523	6.37	1	1	697.458	12.783	83.335	601.34	47.0422	1.06172	0.47621	705.222
906	0.014	9.76	0.0481	0.54	3.62	0.61	10.72	4.44	62.3	26.5	126.4	33.6	318	75.9	8	150.4	288	838	10370	1.481	1.448	4.57	1	1	672.452	10.3621	81.69	580.4	56.0118	1.02279	0.522222	677.291
907	0.1072	12.37	0.0613	0.623	4.25	0.65	14.26	6.04	90.9	38.6	196	54.4	512	120.5	8.3	90.3	306	1319	10850	2.72	2.67	6.6	1	1	1050.76	13.1615	116.1	921.5	70.0148	1.01873	0.295098	708.303
908	0.0838	9.83	0.0537	0.523	3.2	0.514	10.84	4.4	62.5	25.18	127	33.9	311.3	74.1	9.57	183.9	347	840	10010	1.541	1.545	4.5	1	1	663.424	10.4905	81.454	571.48	54.476	0.997411	0.529971	676.032
909	0.077	14.44	0.0782	0.799	4.68	0.718	16.97	7.54	117.9	51.9	277	73.7	679	162.9	9.92	123	356	1726	9760	3.56	2.87	12.7	1	1	1407.7	15.3942	147.808	1244.5	80.8421	1.24042	0.345506	768.848
910	1.5	30.5	0.32	2.07	9.59	1.32	28.3	10.86	147.5	58.9	298	74.5	669	151.2	20.83	564	760	1934	9290	5.31	4.24	5.53	1	1	1483.56	34.39	197.57	1251.6	36.3943	1.25236	0.742105	693.13
911	0.99	5.42	0.225	1.65	8.08	0.656	18.17	6.53	80.4	30.4	140.1	31.8	263	54.1	1.642	29.6	79.2	927	8380	0.984	0.642	20.4	1	1	641.521	8.285	113.836	519.4	62.6916	1.53271	0.373737	817.57
912	0.0287	6.71	0.0758	0.828	5.58	0.429	14.72	5.67	74.6	29.81	137.1	32.7	274.1	58.3	1.926	31.7	94.1	909	9240	1.239	1.221	12.87	1	1	640.652	7.6425	100.999	532.01	69.612	1.01474	0.336876	770.156
913	3.6	5.91	0.33	1.41	6.27	0.483	14.64	5.4	69.7	27.3	124.4	29.2	249.7	52.3	2.059	31.3	97.8	832	8180	1.091	0.549	16.92	1	1	590.643	11.25	96.493	482.9	42.9244	1.98725	0.320041	797.807
914	0.0187	5.7	0.1123	1.05	6.54	0.514	17.18	6.62	88.7	35.7	166.1	39.5	326	68.8	2.73	40.6	129.5	1104	8800	1.207	0.746	10.18	1	1	762.535	6.881	119.554	636.1	92.443	1.61796	0.313514	747.57
915	0.054	7.23	0.1009	1.005	5.89	0.446	15.19	5.79	75.7	29.5	139.3	33.2	279	57.2	3.14	49.1	144.7	915	9200	1.432	0.953	13.19	1	1	649.606	8.3899	103.016	538.2	64.1486	1.50262	0.339323	772.58
916	7	8.89	0.67	2.36	7.06	0.52	16.59	6	76.3	30.9	141.7	33	277.7	57.6	3.03	48.2	146.6	937	8510	1.279	0.674	13.82	1	1	666.29	18.92	106.47	540.9	28.5888	1.89763	0.328786	777.215
917	2.4	7.06	0.176	1.01	5.87	0.415	15.4	5.87	77.7	31.4	148.5	35.7	301	63	3.37	47.2	151.9	976	9290	1.478	0.964	16.1	1	1	695.501	10.646	105.255	579.6	54.443	1.5332	0.310731	792.678
918	0.113	7.1	0.09	0.883	5.26	0.419	13.45	5.09	65.3	25.8	122.6	29.3	256	52.2	3.47	52	167	819	8750	1.59	0.71	15	1	1	583.605	8.186	89.519	485.9	59.3574	2.23944	0.311377	785.456
919	0.022	8.61	0.0631	0.758	4.94	0.34	13.37	5.15	69.2	26.9	131.3	30.8	264.7	53.6	3.65	52.8	167	862	9850	1.577	1.323	10.07	1	1	609.753	9.4531	93	507.3	53.6649	1.19199	0.316168	746.548
920	2.7	9.11	0.33	2.08	9.84	0.683	23.5	8.46	107.7	42.8	198.8	47.3	374	80.9	4.39	74.1	200.9	1302	9370	1.83	1.4	14.9	1	1	908.203	14.22	150.183	743.8	52.3066	1.30714	0.36884	784.778
921	5.3	9.5	0.29	1.87	7.77	0.562	18.3	6.79	88.6	34.5	163	38.8	337	69.2	4.14	70	205	1084	8770	1.78	1.13	13.5	1	1	781.482	16.96	122.022	642.5	37.8833	1.57522	0.341463	774.883
922	0.18	9.64	0.1071	1.02	6.46	0.458	16.57	6.55	88.2	35.2	168.4	40.9	352	73.5	5.05	69.2	244	1098	9600	2.47	2.34	10.86	1	1	799.185	10.9471	118.238	670	61.2034	1.05556	0.283607	753.701
923	0.0062	4.79	0.0505	0.545	3.19	0.563	8.12	3.095	42.1	17.68	92.7	25.02	254	59.2	0.67	9.75	33.57	591	8930	0.768	0.655	10.93	1	1	511.06	5.3917	57.068	448.6	83.202	1.17252	0.290438	754.314
924	0.0055	4.3	0.0356	0.4	2.3	0.371	5.54	2.21	31.6	13.18	67.1	17.69	197	42.8	0.746	11.7	36.5	430	9310	0.821	0.598	9.44	1	1	384.532	4.7411	42.021	337.77	71.243	1.37291	0.320548	740.508
925	0.0027	3.59	0.0429	0.464	2.4	0.568	6.17	2.4	36.6	15.45	89.6	26	255	66.1	0.764	10.23	37.8	530	8140	0.64	0.464	11.51	1	1	504.388	4.0996	48.138	452.15	110.291	1.37931	0.270635	759.275
926	0.0084	4.58	0.0592	0.615	3.16	0.59	7.22	2.72	38.6	17	86.6	25	261	63	0.777	10.2	38.7	563	8730	0.823	0.666	11.44	1	1	510.153	5.2626	52.29	452.6	86.0031	1.23574	0.263566	758.687
927	9.7	11.2	1.28	3.87	8.54	1.107	15.9	5.64	73.3	29.6	132.5	33.8	327	69.7	1.021	23.7	49.9	921	9480	0.771	0.524	9.51	1	1	723.137	26.05	104.487	592.6	22.7486	1.47137	0.47495	741.195
928	0.0217	5.84	0.157	1.36	6.66	1.198	15.7	5.7	75.7	31.2	146.8	37.5	347	80.6	1.088	23.1	52.9	983	8460	0.762	0.549	13.62	1	1	755.437	7.3787	104.958	643.1	87.1563	1.38798	0.436673	775.762
929	4.3	8.7	0.56	1.77	4.32	0.568	9.55	3.75	53.2	22.88	112.4	29.6	298.6	66.7	1.133	20.2	53	731	9750	1.199	0.842	10.26	1	1	616.898	15.33	71.388	530.18	34.5845	1.42399	0.381132	748.309
930	0.15	7.34	0.072	0.609	3.37	0.517	8.45	3.44	50.4	21.7	105.5	27.7	276	60.9	1.101	22.2	53.3	706	8980	1.142	0.726	15.1	1	1	566.148	8.171	66.177	491.8	60.1885	1.573	0.41651	786.13
931	0.064	7.01	0.0372	0.382	2.266	0.402	7.11	2.95	44.5	18.4	101.5	26.8	255	61.9	1.137	21.14	54.6	598	9180	0.919	0.725	8.57	1	1	528.321	7.4932	57.228	463.6	61.8694	1.26759	0.387179	731.6
932	0.0104	7.76	0.0732	0.731	4.22	0.672	10.09	4.21	62.3	27.2	134.3	35.1	349	77.4	1.195	23.22	58.1	879	8830	1.362	0.823	11.83	1	1	713.067	8.5746	81.492	623	72.6565	1.65492	0.399656	761.925
933	0.041	7.77	0.0671	0.648	3.84	0.696	10.9	4.51	67.6	27.9	161.4	43.2	406	104.6	1.42	22.98	68.1	1001	8790	1.309	1.074	11.5	1	1	839.172	8.5261	87.546	743.1	87.1559	1.21881	0.337445	759.191
934	0.025	7.85	0.0552	0.55	3.19	0.578	9.82	4.14	63.9	26.4	150.4	41.1	373	93.7	1.444	23.79	70	923	8940	1.254	1.04	9.71	1	1	774.708	8.4802	81.628	684.6	80.7292	1.20577	0.339857	743.135
935	0.119	8.6	0.0962	0.868	4.57	0.808	13.3	5.38	78.5	33.7	178.8	48.1	432	108.7	1.566	26.6	75.4	1139	8900	1.326	1.096	16.4	1	1	913.541	9.6832	102.558	801.3	82.7516	1.20985	0.352785	794.579
936	0.0215	6.49	0.0522	0.547	3.15	0.622	9.24	3.68	53.2	23.49	126.4	35	330	82.9	1.872	17.14	100.6	768	8770	1.109	1.476	10.57	1	1	674.793	7.1107	69.892	597.79	84.0691	0.751355	0.170378	751.126
937	0.0036	5.4	0.0343	0.341	1.827	0.322	5.17	2.173	34.5	14.62	85.1	24.2	251	63.4	4.48	48.3	162.2	496	9580	0.834	0.855	6.19	1	1	488.091	5.7789	43.992	438.32	75.8483	0.975439	0.297781	702.747
938	0.0232	17.28	0.1299	1.231	7.23	1.614	23.66	9.86	139.1	60.1	293	75.2	684	165.8	7.49	173.1	362	1948	8510	2.364	1.593	12.23	1	1	1478.23	18.6641	181.464	1278.1	68.4791	1.48399	0.478177	765.158
939	0.52	27.8	0.134	0.87	5.19	0.611	19.1	8.8	146	66	373	103	850	245	16.3	249	730	2170	12900	8.8	18.9	16.4	1	1	1846.03	29.324	179.701	1637	55.8246	0.465608	0.341096	794.579
940	0.0091	4.79	0.0505	0.545	3.39	0.563	8.14	3.095	42.1	17.68	92.6	25.02	254	59.2	0.669	9.76	33.57	592	8930	0.768	0.655	10.9	1	1	511.183	5.3946	57.288	448.5	83.1387	1.17252	0.290736	754.051
941	0.0057	4.3	0.0356	0.401	1.99	0.372	5.55	2.21	31.6	13.18	67	17.69	197	42.8	0.744	11.71	36.5	430	9310	0.822	0.598	9.42	1	1	384.134	4.7423	41.722	337.67	71.2038	1.37458	0.320822	740.31
942	0.0071	3.59	0.0429	0.462	2.55	0.568	6.18	2.4	36.6	15.45	89.5	26	255	66.1	0.764	10.25	37.8	529	8140	0.64	0.464	11.52	1	1	504.45	4.102	48.298	452.05	110.202	1.37931	0.271164	759.359
943	0.0107	4.58	0.0593	0.616	3.16	0.591	7.24	2.72	38.6	17	86.5	25	261	63	0.776	10.22	38.7	563	8730	0.824	0.666	11.4	1	1	510.077	5.266	52.311	452.5	85.9286	1.23724	0.264083	758.35
944	10.8	11.2	1.28	3.9	7.96	1.11	16	5.64	73.3	29.6	132.2	33.8	327	69.7	1.019	23.7	49.9	922	9480	0.772	0.524	9.48	1	1	723.49	27.18	104.01	592.3	21.7918	1.47328	0.47495	740.901
945	0.0259	5.84	0.157	1.37	6.85	1.2	15.8	5.7	75.7	31.2	146.6	37.5	347	80.6	1.087	23.1	52.9	984	8460	0.763	0.549	13.59	1	1	755.543	7.3929	105.25	642.9	86.9618	1.3898	0.436673	775.543
946	4.8	8.7	0.56	1.78	3.94	0.569	9.59	3.75	53.2	22.88	112.2	29.6	298.6	66.7	1.131	20.2	53	732	9750	1.2	0.842	10.23	1	1	616.869	15.84	71.049	529.98	33.4583	1.42518	0.381132	748.032
947	0.16	7.34	0.072	0.611	3.02	0.518	8.49	3.44	50.4	21.7	105.3	27.7	276	60.9	1.099	22.2	53.3	707	8980	1.143	0.725	15.1	1	1	565.651	8.183	65.868	491.6	60.0758	1.57655	0.41651	786.13
948	0.079	7.01	0.0372	0.38	2.548	0.402	7.13	2.95	44.5	18.4	101.3	26.8	255	61.9	1.138	21.14	54.6	596	9180	0.919	0.725	8.57	1	1	528.436	7.5062	57.53	463.4	61.7356	1.26759	0.387179	731.6
949	0.115	6.85	0.399	3.01	9.29	1.93	15.7	4.44	44	14.9	58.6	13.18	130.7	25.2	0.693	31.1	57.3	480	8570	0.449	0.161	6.76	1	1	328.314	10.374	75.36	242.58	23.3835	2.78882	0.542757	710.394
950	0.0169	6.25	0.099	0.92	3.67	0.828	7.66	2.593	30.3	11.7	53	12.92	134.6	27.02	0.701	17.61	58.1	391	8380	0.533	0.268	8.73	1	1	291.577	7.2859	45.051	239.24	32.836	1.98881	0.303098	733.292
951	0.0113	7.76	0.0732	0.734	3.7	0.674	10.13	4.21	62.3	27.2	134.1	35.1	349	77.4	1.193	23.23	58.1	880	8830	1.362	0.823	11.81	1	1	712.393	8.5785	81.014	622.8	72.6001	1.65492	0.399828	761.761
952	0.052	7.77	0.0671	0.647	4.23	0.696	10.92	4.51	67.6	27.9	161.1	43.2	406	104.6	1.421	22.98	68.1	999	8790	1.309	1.074	11.51	1	1	839.292	8.5361	87.956	742.8	87.0187	1.21881	0.337445	759.275
953	0.033	7.85	0.0552	0.549	3.56	0.578	9.84	4.14	63.9	26.4	150.1	41.1	373	93.7	1.445	23.8	70	921	8940	1.254	1.04	9.71	1	1	774.805	8.4872	82.018	684.3	80.6273	1.20577	0.34	743.135
954	0.141	8.6	0.0962	0.869	5.35	0.808	13.33	5.38	78.5	33.7	178.4	48.1	432	108.7	1.567	26.6	75.4	1138	8900	1.326	1.096	16.4	1	1	913.974	9.7062	103.368	800.9	82.5143	1.20985	0.352785	794.579
955	0.0277	6.49	0.0522	0.546	3.62	0.622	9.26	3.68	53.2	23.49	126.1	35	330	82.9	1.872	17.15	100.6	767	8770	1.109	1.476	10.55	1	1	674.988	7.1159	70.382	597.49	83.9655	0.751355	0.170477	750.946
956	0.126	16.7	0.408	3.17	12.08	2.786	28.9	9.25	99.7	34.3	137.4	30.5	269.7	53.6	1.856	93.9	154.1	1130	8000	0.991	0.451	13.29	1	1	698.62	20.404	152.716	525.5	25.7548	2.19734	0.609345	773.327
957	0.0082	5.4	0.0343	0.339	1.965	0.322	5.18	2.173	34.5	14.62	85	24.2	251	63.4	4.48	48.3	162.2	495	9580	0.834	0.855	6.2	1	1	488.142	5.7815	44.14	438.22	75.7969	0.975439	0.297781	702.886
958	0.0286	17.28	0.13	1.235	7.95	1.616	23.73	9.86	139.1	60.1	293	75.2	684	165.8	7.49	173	362	1949	8510	2.365	1.593	12.2	1	1	1479.03	18.6736	182.256	1278.1	68.4442	1.48462	0.477901	764.919
959	0.61	27.8	0.134	0.87	6.07	0.611	19.2	8.8	146	66	372	103	850	245	16.3	249	730	2170	12900	8.8	18.9	16.4	1	1	1846.1	29.414	180.681	1636	55.6198	0.465608	0.341096	794.579
960	10.3	9.6	0.69	1.33	2.36	0.312	5.72	1.96	25	9.9	46.4	11	114	23.5	0.787	9.43	31	292	9870	0.613	0.414	12.4	1	1	262.072	21.92	35.352	204.8	9.34307	1.48068	0.304194	766.506
961	0.0033	6.97	0.0359	0.379	2.52	0.327	6.41	2.34	29.4	11.5	53.1	13.26	139.1	25.9	0.663	12.51	42.8	347	10780	0.596	0.379	7.6	1	1	291.245	7.3882	40.997	242.86	32.8713	1.57256	0.29229	720.75
962	0.057	8.63	0.0757	0.675	4.23	0.567	10.75	3.78	47.6	17.89	82.9	19.75	185.8	38.2	0.735	16.08	47.4	543	9900	0.751	0.504	10.96	1	1	420.905	9.4377	66.927	344.54	36.5068	1.49008	0.339241	754.576
963	0.009	9.06	0.0598	0.64	4.27	0.536	10.69	3.781	47.9	17.6	82.8	19.07	178.5	34.97	0.713	17.24	47.9	536	9800	0.801	0.578	11.77	1	1	409.886	9.7688	67.177	332.94	34.082	1.38581	0.359916	761.433
964	0.117	9.98	0.114	1.083	7.14	0.833	16.6	5.51	66.5	24.5	106.4	23.9	213	40.8	0.76	24.1	49	750	10330	0.72	0.436	12.34	1	1	516.477	11.294	96.583	408.6	36.1785	1.65138	0.491837	766.032
965	0.14	8.98	0.051	0.465	2.74	0.364	6.76	2.444	32.4	12.59	58.9	14.63	152.5	28.7	0.787	15.89	50.3	385	10980	0.725	0.523	12.3	1	1	321.664	9.636	44.708	267.32	27.7418	1.38623	0.315905	765.715
966	0.0097	9.29	0.0486	0.521	3.41	0.43	8.4	3.03	40.4	15.5	74.6	18.65	182.9	36.9	0.801	17.28	52.2	476	11140	0.803	0.612	8.28	1	1	394.089	9.8693	55.67	328.55	33.2901	1.31209	0.331034	728.467
967	0.0061	7.79	0.0427	0.421	2.39	0.377	5.92	2.206	28.1	11.41	56.4	15.03	160.1	33.1	0.896	20.22	59.5	362	10990	0.674	0.549	6.3	1	1	323.293	8.2598	38.993	276.04	33.4197	1.22769	0.339832	704.266
968	5.9	13.8	1.04	2.43	4.18	0.491	8.16	2.85	35.8	13.44	65.1	15.82	161.8	32.8	1.033	23.8	66	417	10860	0.766	0.603	8.2	1	1	363.611	23.17	51.481	288.96	12.4713	1.27032	0.360606	727.587
969	0.0426	12.14	0.357	3.2	15.25	1.752	30.5	9.26	104.1	37.4	158.1	35.1	299	60.3	1.052	34.8	69.4	1144	9400	0.682	0.46	11.35	1	1	766.502	15.7396	160.862	589.9	37.4787	1.48261	0.501441	757.927
970	0.0212	13.4	0.207	2.11	12.7	1.49	26.9	8.8	98	35.1	148	33.2	270	56.4	1.12	37.6	72.2	1140	9860	0.77	0.489	8.58	1	1	706.328	15.7382	147.89	542.7	34.483	1.57464	0.520776	731.707
971	0.0112	10.95	0.0796	0.866	5.58	0.699	13.17	4.62	58.8	22.6	106.7	26	244	51.5	1.143	25.9	75.4	730	10410	1.039	0.807	8.95	1	1	545.576	11.9068	82.869	450.8	37.8607	1.28748	0.343501	735.578
972	0.0434	12.13	0.206	1.787	8.91	1.022	21.59	7.11	87.4	34.2	144.7	34.3	288.7	62.3	1.286	37.4	82.2	1022	9920	1.195	0.798	12.58	1	1	704.398	14.1664	126.032	564.2	39.8266	1.49749	0.454988	767.917
973	0.0382	7.57	0.0217	0.228	1.298	0.21	3.15	1.125	15.39	6.55	33.8	9.78	131.2	28.4	1.567	24.29	101.6	221	12780	0.742	0.72	4.28	1	1	238.761	7.8579	21.173	209.73	26.6903	1.03056	0.239075	671.964
974	0.134	15.94	0.47	3.72	19.29	2.275	42.5	14.09	167.1	58.4	242.3	52.9	421	83	1.554	60.8	102	1736	9490	1.047	0.691	12.47	1	1	1123.12	20.264	245.255	857.6	42.3214	1.5152	0.596078	767.057
975	0.0314	27.6	0.2312	2.108	11.65	1.34	26.12	9.2	115.2	43.8	196	45.3	378	76.7	2.68	92.4	176	1391	9930	1.99	1.385	13.21	1	1	933.281	29.9706	163.51	739.8	24.6842	1.43682	0.525	772.729
976	0.159	21.7	0.885	6.43	30.1	3.44	68.3	23.4	285	106.5	445	101.1	769	160	3.37	151	217	3150	9040	1.65	1.244	13.27	1	1	2021.01	29.174	410.24	1581.6	54.2127	1.32637	0.695853	773.178
977	0.186	39.2	1.279	9.39	46.6	5.15	92.3	28.4	302	102.8	436	93	713	147.4	3.42	177	220	3180	9700	1.82	1.234	10.68	1	1	2016.7	50.055	474.45	1492.2	29.8112	1.47488	0.804545	752.109
978	0.0037	7.59	0.0302	0.275	1.67	0.364	4.35	1.715	19.72	8.5	38.6	10.01	123	23.4	0.914	13.62	36	264	10730	0.511	0.269	3.85	1	1	239.228	7.8989	27.819	203.51	25.7643	1.89963	0.378333	663.487
979	0.0046	12.37	0.13	0.868	6.84	1.431	16.89	6.2	67	27.8	120.7	29.9	248	61	1.52	31.1	58	810	9750	0.684	0.404	5.65	1	1	599.134	13.3726	98.361	487.4	36.4477	1.69307	0.536207	694.947
980	0.0084	15.24	0.182	1.28	10.11	2.238	25.83	9.5	118.8	49.5	241.7	61.8	437	129.3	2.68	46.8	101.1	1515	10470	0.922	0.708	4.31	1	1	1102.49	16.7104	166.478	919.3	55.0136	1.30226	0.462908	672.529
981	0.127	32	0.815	3.53	24.4	4.7	56.8	19.9	232	94.8	406	96.7	606	175	2.82	76.6	107.3	2920	9470	1.599	0.793	7.52	1	1	1752.77	36.472	337.8	1378.5	37.7961	2.01639	0.713886	719.806
982	0.0047	9.3	0.0116	0.167	1.14	0.222	3.28	1.2	16.8	6.5	32	8.7	104	19.7	2.9	41.3	111	220	11950	1.41	0.63	1.78	1	1	203.025	9.4833	22.642	170.9	18.0212	2.2381	0.372072	606.028
983	0.0055	5.19	0.0287	0.419	2.79	0.672	7.22	2.699	36.11	14.17	70.3	17.52	168.2	34.9	3.02	26.9	116	437	9720	0.92	0.402	3.83	1	1	360.224	5.6432	49.491	305.09	54.0633	2.28856	0.231897	663.074
984	0.0101	10.51	0.0738	0.507	3.58	0.784	9.34	3.48	42.5	17.93	85.9	21.74	219.1	50.6	3.49	54.3	134	552	10850	0.894	0.556	12	1	1	466.055	11.1009	59.684	395.27	35.607	1.60791	0.405224	763.31
985	0.0093	17.82	0.0311	0.368	2.68	0.527	8.14	3.04	41.6	16.18	81.1	21.61	215.4	48.8	3.67	69.8	144.5	552	11420	1.656	0.579	2.44	1	1	457.305	18.2284	55.987	383.09	21.0161	2.8601	0.483045	628.644
986	0.0737	16.9	0.074	0.515	2.99	0.62	8.7	3.39	47.8	20.2	104	29.6	281	69.3	4.15	63.7	158	717	12030	1.37	0.485	11.5	1	1	585.163	17.5627	63.5	504.1	28.7029	2.82474	0.403165	759.191
987	0.0127	24.1	0.387	2.45	25.6	6.83	79.9	30.6	353	141	604	140	997	272	4.19	121	164	4240	8540	3.1	1.286	10	1	1	2676.88	26.9497	495.93	2154	79.9267	2.41058	0.737805	745.892
988	0.0161	22.42	0.0416	0.481	3.74	0.732	11.9	4.56	63.5	25.3	128.4	33.6	319	71.9	5.84	86.9	222.2	887	11710	3.49	1.267	2.58	1	1	685.591	22.9587	84.432	578.2	25.1844	2.75454	0.391089	632.766
989	0.0313	32	0.0898	0.953	6.53	1.071	16.42	5.96	77.2	30.1	141.9	36.2	317	66.2	6.46	154	250	996	10840	3	1.442	3.76	1	1	731.655	33.0741	107.181	591.4	17.8811	2.08044	0.616	661.614
990	0.0091	23.6	0.062	0.662	4.49	0.79	11.89	4.28	55	21.2	102.5	27.9	247.1	54.4	6.55	127.6	253.7	706	11230	1.695	0.886	2.74	1	1	553.883	24.3331	76.45	453.1	18.6207	1.91309	0.502956	637.255
991	0.56	27.6	0.173	0.97	5.33	0.864	13.46	4.66	59.5	22	103	25.9	230	46.3	6.87	184.2	261	733	10720	2.54	1.22	3.53	1	1	540.317	29.303	83.814	427.2	14.5787	2.08197	0.705747	656.651
992	1.42	16.9	0.46	1.21	3.6	0.778	8	2.76	35.5	15	79.8	22.3	227	59.1	8.5	80	345	498	11580	1.107	0.531	16.7	1	1	473.828	19.99	50.638	403.2	20.1701	2.08475	0.231884	796.451
993	0.016	30.6	0.142	0.985	7.63	1.671	22.1	7.91	98	42.2	206	53.9	420	123.1	9.92	284	382	1351	11820	1.437	0.601	1.9	1	1	1014.25	31.743	137.311	845.2	26.6263	2.39101	0.743455	610.612
994	0.0108	31.5	0.292	1.617	14.47	3.15	37.2	12.61	135.1	52.9	221	53.8	390	105.6	10.31	325	392	1630	10030	1.377	0.632	4.88	1	1	1059.25	33.4198	202.53	823.3	24.6351	2.1788	0.829082	682.684
995	0.0394	34.3	0.291	1.835	10.66	2.294	25.07	8.55	100.6	41.7	194.2	51.9	416	116.2	15.19	521	594	1394	11190	2.22	0.89	2.42	1	1	1003.64	36.4654	147.174	820	22.4871	2.49438	0.877104	628.039
996	0.33	78.1	0.375	3.21	21.51	3.07	50	16.76	193	73.4	314.7	77.5	593	132.1	14.99	521	600	2373	10920	5.71	2.21	4.6	1	1	1557.06	82.015	284.34	1190.7	14.5181	2.58371	0.868333	677.826
997	2.21	33.7	1.27	2.93	11.16	2.13	27.9	9.71	118.7	49	224	57.9	439	124.3	16.01	271	610	1580	12890	2.01	0.695	2.47	1	1	1103.91	40.11	169.6	894.2	22.2937	2.89209	0.444262	629.544
