# Supplementary material for: New machine learning models on reevaluation of the Ti-in-zircon thermometer via multivariate trace elements
Source: Royal Society of Chemistry journal article supplement (doi:10.1039/d4ja00352g), 2024-11-20
Supplement: d4ja00352g1.zip [file TableS2.dabiesuluData_2292.xlsx]

## Sheet: 1dabiesuluData_2282
entry_id	la_ppm	ce_ppm	pr_ppm	nd_ppm	sm_ppm	eu_ppm	gd_ppm	tb_ppm	dy_ppm	ho_ppm	er_ppm	tm_ppm	yb_ppm	lu_ppm	pb_ppm	th_ppm	u_ppm	y_ppm	hf_ppm	nb_ppm	ta_ppm	ti_ppm	α(SiO2)	α(TiO2)	REE	LREE	MREE	HREE	HREE/LREE	Nb/Ta	Th/U	T(℃)
1	2.47	26.5	4.34	30.3	8.59	11.8	18	3.56	44.5	18.6	95.2	21.5	224	53.9	493	39.8	10	701	17400	0.63	0.3	5.48	1	1	563.26	63.61	86.45	413.2	6.49583	2.1	3.98	692.214
2	0	0.2	0.03	0.14	0.23	0.26	2.8	1.58	28.4	14.8	79.7	18.9	203	49.2	406	25.8	0.18	523	19267	0.47	0.3	1.76	1	1	399.24	0.37	33.27	365.6	988.108	1.56667	143.333	605.088
3	0.99	5.92	0.64	5.06	8.17	0.7	48.7	17.8	223	85.5	383	78.6	700	132	405	33.2	22.3	2570	11800	1.65	1.12	17.8	1	1	1690.08	12.61	298.37	1379.1	109.366	1.47321	1.48879	802.943
4	0.42	4.13	0.81	5.67	4.52	1.52	9.08	2.59	32.9	15.9	87.8	21.4	229	54.4	131	10.9	2.89	559	17283	0.78	0.29	2.51	1	1	470.14	11.03	50.61	408.5	37.0354	2.68966	3.77163	630.579
5	0	0.003	0.02	0	0.07	0.11	2.31	1.87	53.5	40	285	78.3	879	207	492	30.8	0.11	1571	27156	3.24	1.86	5.08	1	1	1547.18	0.023	57.86	1489.3	64752.2	1.74194	280	685.865
6	8.39	57.9	9.41	71.9	44.5	24	89.9	16.5	123	32.5	105	16	129	24.6	34.03	70.6	7.18	1050	17884	1.48	0.45	26.4	1	1	752.6	147.6	297.9	307.1	2.08062	3.28889	9.83287	845.889
7	6.19	38.8	5.66	36.5	18	23.4	38	7.88	71.7	21.9	72.6	12.1	107	20.4	34.03	78	8.42	753	17283	1.56	0.71	2.77	1	1	480.13	87.15	158.98	234	2.68503	2.19718	9.26366	637.922
8	0.4	2.42	0.53	2.54	0.84	0.72	3.57	1.36	32.2	22.7	150	38.6	412	93.7	433	34.8	8.37	868	19273	5	1.8	4.37	1	1	761.58	5.89	38.69	717	121.732	2.77778	4.15771	673.499
9	1.03	6.43	3.3	13.2	3.04	1.81	9.1	1.56	22.2	11.5	67.1	17.7	199	50.3	186	49.9	42.8	420	16945	0.65	0.31	5.26	1	1	407.27	23.96	37.71	345.6	14.424	2.09677	1.16589	688.771
10	9.23	8.37	1.58	8.42	2.04	2.6	5.93	2.12	31.9	15.3	73.1	16.4	164	35.9	34.03	101	37.6	527	21019	1.52	0.74	5.59	1	1	376.89	27.6	44.59	304.7	11.0399	2.05405	2.68617	693.892
11	0	0.16	0.004	0.15	0.54	0.75	7.64	2.65	24.2	6.7	27.5	5.27	63.5	12.2	12.4	1.01	194	254	12866	0.21	0.06	1.56	1	1	151.264	0.314	35.78	115.17	366.783	3.5	0.00520619	596.75
12	0.27	5.95	0.58	4.48	3.07	6.02	14.4	4.84	65	25.2	130	27.8	338	67.5	57.5	13.7	909	1056	12751	0.94	0.35	7.41	1	1	693.11	11.28	93.33	588.5	52.172	2.68571	0.0150715	718.343
13	0.15	2.15	0.32	2.61	1.69	1.1	4.83	1.49	19.3	6.82	34	7.23	85.9	16.8	49.3	68.8	770	274	12904	0.9	0.38	2.66	1	1	184.39	5.23	28.41	150.75	28.8241	2.36842	0.0893506	634.889
14	0.55	7.74	1.23	12.9	14.6	1.07	73.1	25.6	335	123	589	116	1219	197	104	144	460	3917	12752	1.47	0.84	8.45	1	1	2715.79	22.42	449.37	2244	100.089	1.75	0.313043	730.164
15	0.1	1.37	0.18	1.37	1.49	1.81	10.1	2.85	22.4	5.67	21.4	3.86	41.2	7.6	18.7	16.3	294	205	12945	0.3	0.1	7.08	1	1	121.4	3.02	38.65	79.73	26.4007	3	0.0554422	714.308
16	0	0.19	0.001	0.14	0.68	0.73	7.62	2.65	24.7	6.84	30.3	6.07	71.9	14.3	14.1	1.13	211	266	12426	0.29	0.07	2.43	1	1	166.121	0.331	36.38	129.41	390.967	4.14286	0.00535545	628.192
17	0.061	0.7	0.059	0.54	0.37	0.26	2.84	0.99	11.7	4.26	22.1	4.75	59.5	12.7	19.7	14.3	261	167	12103	0.84	0.24	13.9	1	1	120.83	1.36	16.16	103.31	75.9632	3.5	0.0547893	777.641
18	1.21	9.04	1.32	9.19	4.57	5.01	8.96	1.85	17.1	5.19	23.1	4.53	54.9	10.9	52.3	42.8	804	222	14471	0.87	0.5	3.52	1	1	156.87	20.76	37.49	98.62	4.75048	1.74	0.0532338	656.28
19	0	0.13	0.003	0.09	0.21	0.26	2.39	0.82	8.37	2.7	12.6	2.7	33.1	6.43	25.7	1.35	411	107	13370	0.43	0.25	3.14	1	1	69.803	0.223	12.05	57.53	257.982	1.72	0.00328467	647.436
20	0.003	0.12	0.002	0.14	0.25	0.25	3.5	1.41	13	2.67	7.81	1.03	8.86	1.29	7.91	1.33	124	98.5	13474	0.31	0.1	2.28	1	1	40.335	0.265	18.41	21.66	81.7358	3.1	0.0107258	623.533
21	0.027	0.58	0.029	0.53	1.36	1.46	11.1	2.94	21.7	5.87	25.5	5.22	62.2	12	23.2	13.4	314	217	12794	0.42	0.09	9.97	1	1	150.516	1.166	38.56	110.79	95.0172	4.66667	0.0426752	745.46
22	0.004	1.05	0.047	1.04	3.05	0.12	24	10.4	150	61	306	63.5	698	116	93.4	65.6	521	1962	13599	1.02	0.74	5.45	1	1	1434.21	2.141	187.57	1244.5	581.27	1.37838	0.125912	691.751
23	0.092	0.74	0.07	0.62	1.27	1.15	10.1	2.51	17.8	4.07	14.2	2.31	21.5	3.47	23.5	6.19	373	151	12121	0.23	0.05	2.46	1	1	79.902	1.522	32.83	45.55	29.9277	4.6	0.0165952	629.095
24	0.016	0.42	0.035	0.36	0.44	0.64	5.31	2.43	34.9	13.3	69.2	15	182	36.8	42	2.93	641	530	13185	0.71	0.3	2.89	1	1	360.851	0.831	43.72	316.3	380.626	2.36667	0.00457098	641.118
25	0.073	1.55	0.35	2.75	1.89	3.93	9.09	3.42	46.3	17.2	84	17.3	202	39.9	81.1	5.31	723	683	12730	0.91	0.24	6.79	1	1	429.753	4.723	64.63	360.4	76.3074	3.79167	0.0073444	710.632
26	0.038	0.27	0.015	0.23	0.31	0.33	3.54	1.53	19	6.97	34.3	7.33	88.5	18	21.2	2.05	257	265	13174	0.28	0.11	4.3	1	1	180.363	0.553	24.71	155.1	280.47	2.54545	0.00797665	672.191
27	0.004	0.16	0.003	0.15	0.43	0.46	5.4	2.17	19.9	4.39	13.8	2.17	20.9	3.47	8.31	1.45	128	157	12929	0.45	0.11	2.05	1	1	73.407	0.317	28.36	44.73	141.104	4.09091	0.0113281	615.863
28	0.09	0.33	0.029	0	0	0.027	0.39	0.27	4.41	2.72	18.5	5.19	64.2	17.5	12.8	0.53	144	91.1	13218	0.24	0.17	1.28	1	1	113.656	0.449	5.097	108.11	240.78	1.41176	0.00368056	583.413
29	0	0.001	0	0.105	0	0	0.049	0.08	2.52	2.11	19.2	6.85	88.6	25.8	3.74	0	45.7	88.3	13417	0.37	0.19	0.11	1	1	145.315	0.106	2.649	142.56	1344.91	1.94737	0	446.533
30	0	0	0	0	0.089	0.024	0	0.15	4.83	3.35	27.7	8.66	105	28.7	14.6	0.02	172	133	12897	0.71	0.32	2.38	1	1	178.503	0	5.093	173.41	0	2.21875	0.000116279	626.666
31	0.043	0.17	0.004	0	0.27	0.029	0.66	0.24	3.82	2.64	18	5.49	69	19.5	8.76	0.26	109	96.2	12793	0.27	0.1	20.5	1	1	119.866	0.217	5.019	114.63	528.249	2.7	0.00238532	817.946
32	0.009	0	0.026	0	0.2	0.006	0.64	0.37	9.78	7.09	53.1	17.8	231	59.9	9.5	0.09	121	248	24360	4.44	2.26	7.38	1	1	379.921	0.035	10.996	368.89	10539.7	1.9646	0.000743802	717.983
33	0	0.03	0	0	0.089	0.008	0.51	0.44	11.4	8.73	70.1	23.8	312	81.9	8.43	0.03	107	320	22493	3.7	1.75	4.61	1	1	509.007	0.03	12.447	496.53	16551	2.11429	0.000280374	677.854
34	0.052	0.344	0.006	0.43	0.34	0.022	1.58	0.92	15.3	7.22	40.2	10	114	29.6	28.3	10.7	353	250	11769	0.55	0.26	1.44	1	1	220.014	0.832	18.162	201.02	241.611	2.11538	0.0303116	591.304
35	0	0.17	0	0.14	0.25	0.011	0.49	0.44	7.82	5.49	35.9	10.1	128	34.2	13.8	0.46	171	196	12887	0.38	0.14	3	1	1	223.011	0.31	9.011	213.69	689.323	2.71429	0.00269006	643.952
36	0.011	0.1	0.019	0.11	0.18	0.11	0.85	0.36	7.02	4.44	35.2	11.6	171	36.8	9.23	0.31	123	181	17600	1.73	0.79	3.4	1	1	267.8	0.24	8.52	259.04	1079.33	2.18987	0.00252033	653.577
37	0	0.058	0.013	0	0.11	0.04	0.46	0.16	3.74	1.9	13	3.68	47.9	10.4	14.6	0.42	207	79.9	12599	0.29	0.16	1.16	1	1	81.461	0.071	4.51	76.88	1082.82	1.8125	0.00202899	576.928
38	0.008	0.031	0.01	0.058	0.042	0.027	0.54	0.57	16.5	12.6	110	37.8	554	116	8.89	0.24	113	541	16910	2.18	0.87	5.37	1	1	848.186	0.107	17.679	830.4	7760.75	2.50575	0.00212389	690.507
39	0.017	0.029	0.005	0	0.048	0.018	0.13	0.04	1.3	0.89	7.18	2.5	38.5	8.57	1	0.01	8.68	35.7	13157	0.19	0.06	1.17	1	1	59.227	0.051	1.536	57.64	1130.2	3.16667	0.00115207	577.489
40	0.003	0.001	0.001	0.004	0	0.007	0.14	0.07	1.78	1.33	10.4	3.36	48.8	10.3	6.9	0.07	95.2	56.4	12530	0.39	0.23	1.01	1	1	76.196	0.009	1.997	74.19	8243.33	1.69565	0.000735294	567.97
41	0	0.01	0.01	0.001	0.038	0.004	0.07	0.04	1.98	1.89	18.6	7.4	114	25.5	2.11	0.01	27.7	82.4	12696	0.5	0.24	1.35	1	1	169.543	0.021	2.132	167.39	7970.95	2.08333	0.000361011	586.962
42	0.002	0.022	0	0.02	0.041	0.013	0.24	0.16	3.99	2.29	14.8	4.54	62.7	13.3	6.17	0.1	89.1	89.8	11892	0.31	0.09	0.99	1	1	102.118	0.044	4.444	97.63	2218.86	3.44444	0.00112233	566.691
43	0	0	0.001	0	0.006	0	0.06	0.05	2.33	2.19	21.2	7.76	117	25.7	3.26	0.02	41.5	95.7	13047	0.73	0.35	1.68	1	1	176.297	0.001	2.446	173.85	173850	2.08571	0.000481928	601.854
44	0.034	0.27	0.039	0.31	0.15	0.082	0.5	0.22	3.84	2.54	18.6	5.92	82.6	18.2	7.67	0.69	95.5	105	12153	0.34	0.15	1.33	1	1	133.305	0.653	4.792	127.86	195.804	2.26667	0.00722513	585.964
45	0.005	0.037	0	0.03	0.001	0.003	0.25	0.13	4.5	3.27	28.5	9.99	148	32.1	5.23	0.15	66.8	144	16632	1.9	0.91	2.94	1	1	226.816	0.072	4.884	221.86	3081.39	2.08791	0.00224551	642.417
46	0	0	0.006	0	0.03	0.021	0.21	0.1	2.95	2.5	21.2	7.09	100	22	7.3	0.07	99.1	105	12318	0.39	0.23	1.21	1	1	156.107	0.006	3.311	152.79	25465	1.69565	0.000706357	579.696
47	0.004	0	0	0	0	0.009	0	0.1	2.88	2.71	28	11.1	187	44.6	1.21	0.06	7.97	121	13977	0.34	0.11	1.41	1	1	276.403	0.004	2.989	273.41	68352.5	3.09091	0.00752823	589.883
48	0	0.03	0.02	0.35	0	0.068	0	0.14	2.6	1.49	10.2	3.07	35.9	8.84	17.4	0.24	222	55.5	23678	0.67	0.72	1.71	1	1	62.708	0.4	2.808	59.5	148.75	0.930556	0.00108108	603.082
49	0.063	0.02	0.04	0	0.14	0.032	0.85	0.47	9.52	5.51	33.9	9.43	109	28	17.4	0.13	220	189	12981	0.44	0.29	3.24	1	1	196.975	0.123	11.012	185.84	1510.89	1.51724	0.000590909	649.846
50	0	0.09	0.04	0.22	0.23	0.012	0.4	0.19	3.52	1.81	11.8	3.6	42.8	11.2	8.42	0.22	99.4	65.2	17880	0.53	0.28	5.13	1	1	75.912	0.35	4.352	71.21	203.457	1.89286	0.00221328	686.681
51	0	0.16	0	0.33	0.56	0.084	1.9	1.25	21.8	12.2	76.1	21.1	238	59.7	26.8	0.5	331	438	12712	0.95	0.36	4.31	1	1	433.184	0.49	25.594	407.1	830.816	2.63889	0.00151057	672.379
52	0.066	0.09	0.01	0	0	0.19	1.7	1.36	25.2	13	75	18.7	220	56.3	27.4	0.36	344	446	12518	0.56	0.24	2.9	1	1	411.616	0.166	28.45	383	2307.23	2.33333	0.00104651	641.379
53	0.063	0.08	0.02	0.05	0.33	0.24	3.4	1.87	31.3	15.9	88.6	22.1	243	61.6	45.6	0.67	572	552	12138	0.79	0.38	2.15	1	1	468.553	0.213	37.14	431.2	2024.41	2.07895	0.00117133	619.282
54	0.099	0.4	0.06	0.77	0.62	1.19	1.9	0.93	14.3	7.01	38.3	9.37	105	25.5	56.5	0.97	702	243	13721	1.29	0.59	3.7	1	1	205.449	1.329	18.94	185.18	139.338	2.18644	0.00138177	660.194
55	0.018	0.14	0	0.66	0	0.11	0.33	0.4	8.45	4.81	30.7	8.32	95.5	24	18.3	0.37	164	173	17085	0.62	0.3	5.01	1	1	173.438	0.818	9.29	163.33	199.67	2.06667	0.0022561	684.712
56	0.016	0.28	0.045	0.71	0	0.11	1.58	0.61	9.46	4.68	25	5.68	57.3	12.4	2.78	0.24	33.8	164	11480	0.15	0.01	1.61	1	1	117.871	1.051	11.76	105.06	99.9619	15	0.00710059	598.915
57	0.063	0.065	0.029	0.26	0.07	0.066	0.94	0.4	6.04	2.86	15.3	3.46	36.5	8.21	5.28	0.14	65.1	104	12019	0.15	0.05	2.08	1	1	74.263	0.417	7.516	66.33	159.065	3	0.00215054	616.903
58	2.25	9.84	1.56	11.2	9.42	1.16	17.3	3.68	33.6	12.4	60	13.8	146	36.9	41.9	9.91	525	414	14932	0.57	0.15	6.73	1	1	359.11	24.85	65.16	269.1	10.829	3.8	0.0188762	709.855
59	0.008	0.05	0	0	0.035	0.083	1.05	0.54	7.92	3.88	21.3	4.97	49.1	10.8	10.5	0.29	135	139	13119	0.14	0.08	1.22	1	1	99.736	0.058	9.628	90.05	1552.59	1.75	0.00214815	580.238
60	4.33	8.21	1.1	6.82	2.34	1.24	6.13	2.57	34.4	16.8	96.4	24.7	286	77.7	99.9	4.22	1244	611	13975	1.04	0.32	3.85	1	1	568.74	20.46	46.68	501.6	24.5161	3.25	0.00339228	663.337
61	3.94	10.6	2.03	14.8	5.92	1.59	14.8	4.28	55.9	24.7	132	30.6	326	76.3	92.6	10.2	1121	838	13926	1.34	0.46	1.13	1	1	703.46	31.37	82.49	589.6	18.795	2.91304	0.00909902	575.218
62	1.35	4.02	0.67	3.06	1.27	0.62	3.12	0.84	9.59	3.74	17.7	4.12	43.4	10.8	17.8	3.71	106	121	12143	0.23	0.05	2.18	1	1	104.3	9.1	15.44	79.76	8.76484	4.6	0.035	620.282
63	0	0	0.00730985	0.0645837	0.0350213	0	0	0.00533847	0.0107477	0.00558812	0	0.00259638	0	0	0.0620328	0	0.0127825	0.0155027	0.0102398	0.0331807	0.00636792	1.53031	0.5	0.5	0.131186	0.0718936	0.0511075	0.0081845	0.113842	5.2106	0	595.436
64	0.00621782	0	0.00253681	0	0.0181816	0.0150033	0	0.00765151	0.0334636	0.00289871	0.00823731	0.00538605	0.0344555	0.00293306	0.079911	0	0.00998114	0.00676036	0	0.0412779	0	0.417093	0.5	0.5	0.136965	0.00875463	0.0743	0.0539106	6.15796	0	0	514.928
66	0	0.00244969	0	0.0473609	0.0191535	0.00400084	0	0.00585984	0.0117402	0.006097	0.0086681	0.00283092	0	0.00614448	0.0607963	0	0	0.00893895	0	0.00634873	0.00688494	0.953035	0.5	0.5	0.114305	0.0498106	0.0407544	0.0237405	0.476616	0.922119	0	564.27
67	0.00326785	0.0032161	0	0	0	0	0.0598521	0	0.0117072	0.00304076	0.0171731	0	0.0545696	0.0215483	0.0711648	0	0.00350068	0.0311332	0.00842313	0.0544349	0.00690507	0.742629	0.5	0.5	0.174375	0.00648395	0.0715593	0.0963316	14.8569	7.88332	0	548.736
68	0	0.0157315	0	0	0	0.0127454	0.0718342	0	0	0.00287081	0.0104266	0	0	0.110798	0.104376	0.00445748	0	0.0260088	0.0134072	0.0089483	0.0125663	1.00953	0.5	0.5	0.224407	0.0157315	0.0845796	0.124096	7.88834	0.712089	0	567.94
69	0.0035824	0	0.00590789	0	0	0.0230694	0.0217426	0	0.0129478	0	0.0189255	0	0.0161574	0.0101003	0.0127996	0	0	0.00785009	0.0121484	0.00810496	0	0.948667	0.5	0.5	0.112433	0.00949029	0.0577599	0.0451831	4.76099	0	0	563.979
70	0	0	0.0029759	0	0	0	0	0.00965413	0	0	0	0.00628498	0.0401466	0.0135365	0.0237716	0.00405493	0	0.0394788	0	0.0122339	0	2.07605	0.5	0.5	0.0725981	0.0029759	0.00965413	0.0599681	20.1513	0	0	616.767
71	0.00336177	0.00230333	0	0	0.0198462	0	0.020499	0.00899591	0.0487609	0.00313154	0.0267137	0.00586337	0.0937537	0.00216831	0.00275996	0.00636785	0	0.0110089	0.0341842	0.0189634	0.0035492	4.38583	0.5	0.5	0.235398	0.0056651	0.0981019	0.131631	23.2354	5.343	0	673.792
72	0.186004	0	0.00489459	0.433231	0	0	0.0359847	0.00543301	0.0215164	0.013756	0.0467647	0.0128007	0.1659	0.0378014	0.0321686	0.00849224	0.217851	0.398001	0.0100137	0.149715	0.00631815	8.23425	0.5	0.5	0.964086	0.624129	0.0629341	0.277022	0.443854	23.6961	0.0389818	727.814
73	0.00587699	0.00884596	0	0.0215731	0	0.00480191	0.0179021	0	0	0.0109555	0.00775064	0.0101872	0.16511	0.0361049	0.048312	0	0	0.0221459	0.00996778	0.013223	0.00942455	15.234	0.5	0.5	0.289109	0.036296	0.0227041	0.230109	6.33977	1.40304	0	786.877
74	0.0113518	0.00404955	0	0.0277924	0	0.0185302	0.0691198	0.0033726	0	0.00705354	0.0398776	0.00327706	0	0.0180978	0.0496113	0.00458019	0.00834518	0.0366047	0	0.0127469	0	7.64283	0.5	0.5	0.202522	0.0431938	0.0910226	0.068306	1.58138	0	0.548842	721.103
75	0	0	0.00739382	0.043749	0	0.0145621	0	0.00796282	0	0.00147972	0.0156686	0.00515234	0.075782	0.0157171	0.0490651	0.00337672	0.00656963	0.0479168	0.0100954	0.00511607	0	11.6489	0.5	0.5	0.187468	0.0511428	0.022525	0.1138	2.22514	0	0.51399	760.283
76	0.00856242	0.00572501	0	0	0	0	0	0.00254624	0.0206474	0	0	0.00246715	0.0726241	0.0241732	0.0437921	0.00323551	0	0.0368658	0	0.0287113	0.00303959	10.2658	0.5	0.5	0.136746	0.0142874	0.0231936	0.0992645	6.94768	9.44576	0	748.212
77	0.00595841	0.0164945	0	0.0436362	0.0175452	0.00971073	0.036282	0.00265053	0.0107936	0.00832155	0	0.00257906	0.0334009	0.0281666	0.0521254	0.0134603	0.00827248	0.017749	0	0.0184864	0.00168889	17.9713	0.5	0.5	0.215539	0.0660891	0.0769821	0.0724681	1.09652	10.9459	1.62712	803.948
78	0.00296196	0.000197353	0.00490755	0.043291	0	0.0048313	0.0541548	0.00263131	0	0.00826946	0.00781963	0	0.0342948	0.00168464	0.0651188	0.0100195	0.00172451	0.0511947	0	0.016643	0.00629227	8.57622	0.5	0.5	0.165044	0.0513579	0.0616174	0.0520686	1.01384	2.64499	5.81006	731.517
79	0.0369486	0.0297127	0.0442946	0	0.0611407	0.0496699	0	0.025894	0	0.00396056	0	0.0036798	0	0.00255191	1.26645	0.0013132	0.667451	0	0.029017	0.00940209	0	0.569776	0.5	0.5	0.257853	0.110956	0.136705	0.0101923	0.0918587	0	0.00196748	532.855
80	0.0849597	0.0466177	0.0539971	0	0.0671837	0	0.00749833	0.0568753	0	0	0	0	0.103257	0.00438585	0.561969	0.00941234	2.99914	0	0	0.298651	0	1.25393	0.5	0.5	0.424775	0.185574	0.131557	0.107643	0.580053	0	0.00313834	582.049
81	0.0176637	0.0353359	0	0	0.0391935	0.0158605	0	0.0331615	0.00242523	0	0.0126179	0.00234505	0.0300705	0.00192916	0.293317	0.0030557	0.133408	0.00972324	0.00923769	0.197523	0.0114174	1.42634	0.5	0.5	0.190603	0.0529996	0.0906407	0.0469626	0.886093	17.3001	0.0229048	590.66
82	0.0330308	0.00914988	0.00901185	0	0	0	0.00491116	0	0	0	0.0155878	0	0.0168878	0	0.38507	0.0136709	0.782188	0	0	0	0	0.852611	0.5	0.5	0.0885793	0.0511926	0.00491116	0.0324756	0.634381	0	0.0174778	557.264
83	0.0135453	0.00831327	0.00967167	0.00681575	0	0	0.0067115	0	0.00370986	0.00140536	0.0109326	0.00358551	0	0	0.359057	0.0139693	0.120293	0	0.0282632	0.28083	0.0175238	2.22041	0.5	0.5	0.0646908	0.0383459	0.0104214	0.0159235	0.415258	16.0257	0.116127	621.61
84	0.0262306	0.0116729	0.020727	0.0074097	0	0.0532985	0	0.018377	0	0	0	0.00228354	0	0.00568171	0.248989	0	0.0539936	0	0	0.0599103	0.00318723	1.78622	0.5	0.5	0.145681	0.0660402	0.0716755	0.00796524	0.120612	18.797	0	606.122
85	0.0309093	0.0257122	0.0104302	0.00290467	0	0.020978	0	0.043197	0.00631456	0	0.0185239	0.000833389	0	0.000914057	0.542765	0	2.69975	0.0253842	0.0120572	0.043535	0	0.782732	0.5	0.5	0.160717	0.0699564	0.0704896	0.0202713	0.289771	0	0	551.963
86	0.0359547	0.0131498	0.019639	0	0	0	0.0158331	0	0	0.002967	0	0	0.0549098	0.00298507	0.288678	0	1.96514	0	0	0	0	2.04765	0.5	0.5	0.145438	0.0687435	0.0158331	0.0608619	0.885347	0	0	615.781
87	0.0212544	0.0114564	0.0233394	0	0	0.0230118	0.0125451	0.0237772	0	0	0	0.00339882	0.0102075	0	0.460872	0.00437836	0.164467	0	0	0.00439445	0.00411531	2.13407	0.5	0.5	0.128991	0.0560501	0.0593341	0.0136063	0.242752	1.06783	0.0266215	618.747
88	0.188561	0.0237874	0.0577671	0.0233517	0.123518	0.0115156	0.00457387	0.0173133	0.00505673	0	0.0150237	0.00417419	0	0.0160386	0.587963	0.00956721	0.608045	0.0204735	0	0	0.00299546	3.15019	0.5	0.5	0.490681	0.293467	0.161977	0.0352365	0.12007	0	0.0157344	647.684
89	0.034522	0.0111115	0.00984979	0.00230264	0	0	0	0.0169283	0.00742346	0	0.0586487	0.0144509	0.0936651	0.0525424	0.139351	0	0.00918035	0.0101162	0.00502587	0.0125118	0.0045562	8.79983	0.5	0.5	0.301445	0.0577859	0.0243517	0.219307	3.79517	2.74611	0	733.873
90	0.0403446	0	0	0.00258939	0	0	0	0.019035	0	0	0.0373491	0	0.0362868	0.0206643	0.0787161	0.0106418	0	0.0227243	0	0.0281013	0.00512042	7.29068	0.5	0.5	0.156269	0.042934	0.019035	0.0943002	2.1964	5.4881	0	716.902
91	0.060307	0.00802193	0.00146324	0.00664307	0.0589328	0	0.00237954	0	0	0.00883598	0	0.0069447	0.0450536	0	0.0908897	0.00330953	0.0458527	0.0291143	0.0272062	0.00899946	0.00155672	17.1944	0.5	0.5	0.198582	0.0764353	0.0613123	0.0608343	0.795893	5.78104	0.0721775	799.329
92	0.0409524	0.00587607	0.00884125	0	0	0.0345933	0	0.0357486	0	0	0.0077277	0	0	0.00276827	0.302311	0	0	0	0.00996298	0.0263197	0.00939711	16.5246	0.5	0.5	0.136508	0.0556697	0.0703419	0.010496	0.18854	2.80083	0	795.21
93	0.00503503	0	0	0.00220437	0	0	0	0	0.00419383	0	0	0.00812903	0	0	0.24294	0.0053266	0.000691825	0.0170016	0	0	0	5.79797	0.5	0.5	0.0195623	0.0072394	0.00419383	0.00812903	1.12289	0	7.69934	696.993
94	0.117144	0.0744291	0.0777051	0.00821248	0	0.0291863	0.00807999	0	0	0	0.0130526	0.0011444	0.0278309	0.0233945	0.607492	0.00561423	0.0436844	0	0.0168295	0.00555267	0	6.48693	0.5	0.5	0.380179	0.277491	0.0372663	0.0654224	0.235764	0	0.128518	706.65
95	0.121395	0.0290247	0.0824232	0.0213581	0.0472693	0.0189848	0	0	0	0	0.0150053	0	0	0.00162471	0.839729	0.00364475	0.097456	0	0	0	0	35.4001	0.5	0.5	0.337085	0.2542	0.0662541	0.0166301	0.065421	0	0.0373989	880.143
96	0.0558597	0.0246293	0.0395174	0.00509909	0	0	0	0.056256	0	0	0	0.0159959	0.0690187	0.0320457	0.301729	0	0.0168497	0.0334755	0.00870616	0.0345488	0.847945	8.79911	0.5	0.5	0.298422	0.125105	0.056256	0.11706	0.935693	0.0407441	0	733.865
97	0.0233439	0.0044131	0.00862617	0.0035771	0	0.0509326	0.00704375	0	0.00383333	0	0	0	0.0967284	0.0245757	0.481669	0.00973028	0.00470652	0	0	0.0071206	0.00213945	9.39451	0.5	0.5	0.223074	0.0399603	0.0618097	0.121304	3.03562	3.32824	2.0674	739.909
98	0.0291559	0.0208251	0.0284657	0.0145521	0	0	0	0.0181487	0	0.00555577	0	0.00195542	0.0164975	0	0.434449	0	0.111426	0.0161922	0.234121	0.00659612	0.00632479	5.64748	0.5	0.5	0.135156	0.0929987	0.0181487	0.0240087	0.258162	1.0429	0	694.759
99	0.0295245	0.0573712	0.0415172	0	0.0217544	0	0	0.0552596	0.00538959	0	0.0159909	0	0.0167265	0.00568957	1.63239	0	0.876123	0.00820258	0	0.0100131	0	4.40777	0.5	0.5	0.249223	0.128413	0.0824036	0.038407	0.29909	0	0	674.197
100	0.0308959	0.0316711	0.0560748	0.00517803	0	0.0369772	0.0101874	0	0	0	0.0502217	0	0.0701001	0.00594259	0.822193	0.00713165	0.212274	0	0	0.00698108	0	5.90563	0.5	0.5	0.297249	0.12382	0.0471645	0.126264	1.01974	0	0.0335965	698.562
101	0	0	0.00416323	0	0	0	0	0	0	0	0	0	0.0703559	0.00132207	0	0	0	0	0	0	0	1.89464	0.5	0.5	0.0758412	0.00416323	0	0.0716779	17.2169	0	0	610.263
102	0.0487411	0.015953	0.0400391	0	0.0462277	0.0377675	0	0	0	0.0089208	0	0.00275633	0	0.00905476	0.149431	0.0107177	0.151979	0	0.0326181	0	0	6.60378	0.5	0.5	0.20946	0.104733	0.0839952	0.0207319	0.197949	0	0.0705212	708.203
103	0.048515	0.0231983	0.0330871	0	0	0.032716	0	0.0168442	0.00246918	0	0.0219811	0	0.015399	0	0.150238	0	0.0391943	0.0200734	0.00939155	0.00313161	0	7.87746	0.5	0.5	0.19421	0.1048	0.0520294	0.0373801	0.356679	0	0	723.815
104	0.0271415	0.00312199	0.0105264	0.00256389	0	0.0184017	0	0	0.00277632	0.00290389	0.0082506	0.00815134	0	0.0117715	0.108587	0	0.0848913	0.0112178	0	0	0	6.01315	0.5	0.5	0.0956091	0.0433537	0.0211781	0.0310773	0.716832	0	0	700.106
105	0.0531773	0.0130687	0.0283789	0.00536022	0	0.0384949	0	0.0199088	0.0029025	0	0.00593157	0	0.0125812	0.0030846	0.0593406	0	0.00487062	0.0197497	0.0110731	0	0.00344204	8.04322	0.5	0.5	0.182889	0.0999852	0.0613062	0.0215974	0.216006	0	0	725.691
106	0.0391719	0.0230076	0.0515947	0.0053863	0.0712697	0.0193528	0.0212517	0.0400499	0.0116678	0.0091625	0.0086729	0	0.0737165	0	0.253774	0	0	0.0234752	0.0222786	0.0184246	0	9.20979	0.5	0.5	0.374304	0.119161	0.163592	0.0915519	0.768307	0	0	738.068
107	0.0174127	0	0.00815122	0	0.00597429	0	0.0397108	0.0494277	0	0	0.0213634	0	0	0.000765251	0.0747697	0.00921456	0	0	0	0.00909189	0.00086596	31.2247	0.5	0.5	0.142805	0.025564	0.0951129	0.0221286	0.865619	10.4992	0	865.234
108	0.0174755	0.0163029	0	0	0	0.019171	0.00530802	0	0.00290653	0	0	0	0	0.00307189	0.0928788	0.0073826	0.003593	0.0471742	0.0331724	0	0.00531904	33.6062	0.5	0.5	0.0642358	0.0337783	0.0273856	0.00307189	0.0909425	0	2.05472	873.918
109	0.0187355	0.0174397	0.0145526	0	0	0	0	0	0	0	0	0	0	0.00420628	0.0674473	0	0.00809257	0	0	0	0	33.5446	0.5	0.5	0.0549341	0.0507278	0	0.00420628	0.0829185	0	0	873.7
110	0.00335986	0.00934105	0.0186787	0	0	0.0367043	0.00507736	0.0569124	0.00276745	0	0	0.00269714	0.046527	0	0	0	0.0136147	0	0	0.00349664	0.00330806	25.6585	0.5	0.5	0.182065	0.0313796	0.101462	0.0492241	1.56867	1.057	0	842.67
111	0.00846563	0.00390971	0.000260302	0	0	0	0	0.0238414	0.00346983	0	0.0103341	0	0	0.00742526	0.0517514	0	0.00851309	0	0.000884966	0	0	27.1488	0.5	0.5	0.0577062	0.0126356	0.0273112	0.0177593	1.4055	0	0	849.066
112	0.02	5.86	48.098	0.62	38.6402	7.37178	49.1702	11.3261	112.89	37.87	156.072	32.9457	306.438	51.1958	7.80388	193.157	260.786	1094.47	9440.02	6.62563	2.00007	10.4113	1	0.5	858.518	54.598	219.398	584.522	10.7059	3.31269	0.740671	819.631
113	0.479854	11.5194	0.220981	2.78962	4.51957	1.7607	26.2404	9.63454	123.726	51.6396	239.275	57.0447	567.204	99.3362	3.78087	76.9054	132.294	1486.23	7991.35	1.78032	0.623003	11.7277	1	0.5	1195.39	15.0098	165.881	1014.5	67.5891	2.85764	0.581323	832.648
114	0.00580953	21.0192	0.0498655	1.25788	3.04376	1.04112	13.4182	4.36806	47.208	16.6984	67.8843	15.2024	148.202	24.262	1.21088	32.5375	40.1044	478.202	9017.68	0.906801	0.47586	11.6133	1	0.5	363.661	22.3328	69.0792	272.249	12.1905	1.9056	0.811322	831.564
115	0.0059049	28.8555	0.280693	4.47158	7.77522	1.99986	30.1322	8.82455	99.3161	34.6335	153.689	36.0215	355.819	61.5957	4.09821	160.092	118.661	1033.44	10055.4	1.15633	0.600524	3.9865	1	0.5	823.421	33.6137	148.048	641.759	19.0922	1.92553	1.34916	724.9
116	0.00553792	40.0827	0.0981894	2.03956	3.83046	1.45124	18.9329	6.53095	82.1228	32.5509	152.898	37.9622	403.934	75.1188	5.67851	191.251	175.468	1002.86	9616.12	3.47568	1.10667	8.12973	1	0.5	857.557	42.226	112.868	702.463	16.6358	3.14066	1.08995	793.542
117	0.0114342	40.0648	0.0883327	1.69929	3.5859	1.8433	22.9081	7.53838	89.8577	31.5747	138.277	31.9253	334.017	62.0396	12.2376	431.914	355.076	992.165	11156.6	3.43447	0.930327	3.17671	1	0.5	765.432	41.8639	125.733	597.834	14.2804	3.69168	1.2164	704.847
118	0	16.6856	0.11851	2.14191	4.908	2.15032	29.0581	10.522	133.269	51.4696	236.862	53.8307	533.816	96.3695	2.33453	60.1712	74.1855	1527.8	7730.87	2.12213	0.644158	9.06248	1	0.5	1171.2	18.946	179.907	972.347	51.322	3.29442	0.811091	804.842
119	59.9276	143.361	16.3359	78.7314	18.2659	1.49979	28.5687	7.76031	81.3322	28.832	130.808	29.5961	292.085	49.8108	7.04752	170.772	196.583	865.304	9144.77	1.72934	0.752268	11.239	1	0.5	966.915	298.355	137.427	531.132	1.7802	2.29883	0.8687	827.959
120	0.024264	14.3593	0.187322	3.06558	4.23981	0.78359	15.6486	4.42126	44.9818	16.8384	69.3044	15.7941	161.069	27.6361	2.94609	50.2684	68.9926	470.781	7491.02	0.908691	0.409468	20.4519	1	0.5	378.354	17.6365	70.0751	290.642	16.4796	2.2192	0.728605	897.8
121	0.0241599	6.82019	0.324635	5.61326	8.7209	0.471851	37.6331	12.8289	143.952	50.389	210.908	45.2138	412.488	65.255	10.624	141.325	237.906	1398.6	9043.78	0.961935	0.585182	11.1804	1	0.5	1000.64	12.7822	203.607	784.254	61.3549	1.64382	0.594037	827.386
122	0.0359111	112.976	0.507031	8.33821	14.3145	5.47774	68.3477	21.8573	243.396	85.1114	349.282	75.2524	699.005	111.005	10.5086	307.197	181.358	2376.35	7997.87	8.02488	2.07238	7.81407	1	0.5	1794.91	121.857	353.394	1319.66	10.8296	3.8723	1.69387	789.48
123	0.375376	30.3942	0.187867	1.90242	2.77948	0.809894	11.6188	3.69807	41.0088	16.4753	81.2632	20.2938	232.658	50.2655	35.2859	566.868	685.382	569.416	10787.6	1.77519	0.426801	8.81639	1	0.5	493.731	32.8599	59.9151	400.956	12.202	4.15929	0.827084	801.955
124	0.0115099	10.614	0.0790099	1.82372	3.45366	0.800948	17.4942	5.75966	69.5133	25.7288	115.4	26.0289	259.523	44.1316	6.03985	90.1078	127.743	773.008	9559.15	0.980989	0.66232	14.8918	1	0.5	580.363	12.5283	97.0218	470.813	37.58	1.48114	0.705386	859.721
125	0.707019	11.8392	0.394052	5.60957	7.93979	2.15336	30.3535	8.73135	91.3622	29.995	119.951	25.5828	238.545	39.0784	3.13492	55.3217	64.8203	812.783	8027.07	0.772128	0.378088	13.4676	1	0.5	612.242	18.5499	140.54	453.152	24.4289	2.04219	0.853462	848.167
126	0.017448	34.48	0.162909	3.02948	5.26046	2.44439	27.2655	8.4143	96.5502	35.0079	150.59	32.6085	314.468	51.5712	6.17325	216.103	96.8579	1009.89	7729.93	1.54013	0.693511	15.6755	1	0.5	761.87	37.6898	139.935	584.246	15.5014	2.22078	2.23113	865.708
127	0.0239921	13.9516	0.0446289	0.911538	1.78982	0.754674	8.26123	3.14167	36.6001	13.7149	64.0606	15.6707	160.665	29.3738	3.60806	55.245	75.1136	416.147	8187.44	0.774259	0.493171	14.5786	1	0.5	348.964	14.9318	50.5475	283.484	18.9853	1.56996	0.735487	857.258
128	26.6132	66.1662	6.38651	31.6708	12.1488	0.694377	40.7616	13.6801	160.856	61.4433	272.422	63.1155	609.86	103.714	15.6148	239.16	308.967	1770.58	10190.5	4.58955	1.79024	4.4534	1	0.5	1469.53	130.837	228.141	1110.56	8.4881	2.56364	0.774063	734.983
129	1.24625	24.5236	0.469858	5.52572	8.66713	0.967324	37.997	12.9615	149.815	54.1601	232.956	53.0267	510.027	82.0105	12.3677	231.092	249.588	1550.63	10566	2.81427	0.924802	5.27638	1	0.5	1174.35	31.7655	210.408	932.181	29.3457	3.04311	0.925894	750.821
130	0.00560417	1.98596	0.0545416	1.28678	4.37533	0.0896582	33.7467	14.5753	195.984	74.1712	336.297	74.608	705.044	114.053	11.7925	68.8433	256.502	2172.36	11049	1.34881	0.835484	5.1648	1	0.5	1556.28	3.33288	248.771	1304.17	391.305	1.6144	0.268393	748.797
131	0.0169193	28.1436	0.409648	6.70776	11.5516	2.96048	57.8901	18.7159	231.434	84.8754	382.629	87.1549	833.809	142.223	11.1826	215.962	190.241	2461.34	8891.89	2.37165	0.674495	4.33646	1	0.5	1888.52	35.2779	322.552	1530.69	43.3895	3.51618	1.1352	732.542
132	11.7433	48.8199	2.9003	12.7901	4.11368	0.720099	14.6776	4.96213	64.4179	25.2502	121.16	31.5718	333.45	60.1998	10.5978	155.038	192.036	767.587	10932	1.86651	0.718202	4.09849	1	0.5	736.776	76.2537	88.8914	571.631	7.49644	2.59887	0.80734	727.403
133	0	13.2315	0.0564023	0.791759	2.17568	0.503431	11.3705	3.99612	49.2597	20.0497	92.3938	22.1457	224.098	39.5186	2.34495	42.2745	40.2493	588.954	9567.91	1.07941	0.517197	7.54658	1	0.5	479.591	14.0796	67.3055	398.206	28.2824	2.08704	1.05032	785.934
134	0.0115537	42.7519	0.135527	2.71229	6.25185	3.15449	34.8531	12.3454	155.094	60.7586	282.378	66.4454	687.627	124.097	3.82383	92.9677	58.6403	1798.07	7912.58	2.25516	0.493326	8.08641	1	0.5	1478.62	45.6113	211.698	1221.31	26.7764	4.57134	1.58539	792.992
135	66.2562	175.646	20.6692	103.077	22.9715	1.08343	36.1646	9.86011	109.121	41.1568	188.857	44.3337	449.925	75.1491	13.6473	190.114	244.383	1222.36	11926.4	5.76929	2.11486	5.26986	1	0.5	1344.27	365.649	179.2	799.422	2.18631	2.72797	0.777936	750.703
136	0.00566488	42.8935	0.0356229	1.02833	2.96212	1.43789	19.438	7.15137	97.1974	43.5253	222.681	59.7556	690.411	130.138	13.7331	244.585	221.811	1388.92	10182.1	6.97166	1.71784	3.95039	1	0.5	1318.66	43.9632	128.187	1146.51	26.0789	4.05839	1.10267	724.081
137	0.00582316	23.5196	0.0733362	2.05407	3.34304	1.49155	19.1762	6.74497	86.0473	36.3041	178.947	47.8332	541.869	102.911	12.8831	129.659	224.491	1120.4	10299.9	2.74441	1.28076	0.821465	1	0.5	1050.32	25.6528	116.803	907.864	35.3904	2.1428	0.577569	600.311
138	0	24.77	0.0411748	0.995096	2.2936	0.946087	12.1091	4.83363	67.0192	29.6865	149.397	41.1823	472.112	92.6704	12.1157	178.684	197.151	927.877	10653.8	4.15181	1.51872	3.69834	1	0.5	898.056	25.8063	87.2016	785.048	30.4208	2.73375	0.906329	718.183
139	0.152381	39.6188	0.14402	1.52564	2.52753	0.704859	15.6122	5.09337	67.8754	26.8299	134.71	33.8489	366.308	66.2365	16.3043	206.136	259.474	826.456	10857.3	4.45079	2.12705	1.02197	1	0.5	761.187	41.4409	91.8134	627.933	15.1525	2.09247	0.794436	615.651
140	0.0970021	40.5974	0.101127	1.17638	1.35101	0.662426	7.99213	2.42656	33.1992	15.4207	90.2617	26.0125	328.269	70.2639	42.338	506.612	605.962	597.527	10883.5	3.51655	0.494038	2.98817	1	0.5	617.831	41.9719	45.6313	530.227	12.6329	7.11797	0.836047	699.58
141	3.01927	35.8693	1.36294	11.0072	9.51231	0.439211	53.3183	18.2104	222.887	80.0558	337.696	70.0306	619.437	96.4616	22.893	192.426	341.179	2125.66	8696.43	11.031	3.50125	2.6632	1	0.5	1559.31	51.2588	304.367	1203.68	23.4824	3.15058	0.564002	689.822
142	0.0174561	26.2336	0.0532316	0.90456	2.24472	0.438231	10.1563	3.93607	48.2334	19.3804	94.0757	23.3442	254.689	47.7567	16.1758	224.809	209.122	593.334	10477.2	2.36305	1.11143	6.09632	1	0.5	531.464	27.2088	65.0087	439.246	16.1435	2.12613	1.07501	764.71
143	0.023144	7.80838	0.0562966	1.93453	3.38658	0.673516	17.3616	6.17613	78.4278	29.8993	144.027	34.4128	359.232	63.0779	10.6929	87.217	142.884	893.941	9110.75	0.719217	0.459758	1.76467	1	0.5	746.497	9.82235	106.026	630.649	64.2056	1.56434	0.610404	656.487
144	0.0055638	12.573	0.0700482	1.1463	2.48982	0.657351	14.1726	3.83753	46.8803	17.3548	82.3072	19.5868	203.447	36.2393	14.5943	141.246	166.106	538.705	9452.59	0.558553	0.532859	13.1132	1	0.5	440.768	13.7949	68.0375	358.935	26.0194	1.04822	0.850334	845.142
145	0	3.29373	0.029782	0.781421	1.79128	0.292374	17.3398	6.54655	81.1542	27.4303	114.65	24.6081	217.936	33.8458	41.2042	43.4596	291.926	831.998	12228.2	1.63102	1.38609	7.85451	1	0.5	529.699	4.10494	107.124	418.47	101.943	1.1767	0.148872	790.008
146	0	5.05537	0.0267992	0.714917	2.26231	0.152027	14.909	6.69818	92.4971	36.9122	174.289	42.8575	422.207	71.4564	38.9993	65.3417	236.56	1107.05	12506.3	2.25663	1.33913	6.28547	1	0.5	870.038	5.79709	116.519	747.722	128.982	1.68515	0.276217	767.696
147	0.0164747	15.5909	0.0879514	1.50288	2.4346	1.13258	12.3154	4.35276	52.9492	21.1434	104.234	26.7446	292.227	54.8094	25.9581	66.3421	87.591	667.333	10129.6	0.551123	0.194255	5.75946	1	0.5	589.541	17.1982	73.1846	499.158	29.0238	2.83711	0.757407	759.199
148	0.0110491	18.7453	0.0980313	1.52981	2.95935	0.628235	15.3322	4.70252	53.0956	19.5015	81.9944	18.1873	167.25	28.443	48.7352	145.835	130.011	553.638	11217	2.3949	1.59535	26.3928	1	0.5	412.479	20.3842	76.718	315.377	15.4717	1.50117	1.12171	930.314
149	0.0105539	13.7423	0.0392478	0.962605	1.79558	0.24185	12.616	4.8007	61.3185	23.7504	108.147	25.4559	240.859	42.1095	57.5251	112.114	169.571	697.793	10438.7	1.96733	1.23097	7.75303	1	0.5	535.849	14.7547	80.7727	440.322	29.8428	1.59819	0.661163	788.68
150	0.00580365	11.386	0.102594	1.96141	4.1672	0.134845	18.8572	6.33062	73.2828	26.3621	111.942	24.3282	223.284	36.5406	16.1833	36.0627	43.7535	727.605	10051.4	5.11122	1.52443	11.5516	1	0.5	538.686	13.4558	102.773	422.457	31.3959	3.35287	0.824225	830.976
151	0.0116124	12.6337	0.112882	2.00135	4.03393	0.135058	22.6182	7.16407	80.471	28.9791	123.331	26.1889	242.702	38.7651	14.9228	32.0532	39.8346	783.369	9783.58	4.79017	1.55077	10.749	1	0.5	589.148	14.7595	114.422	459.966	31.1641	3.08891	0.804656	823.091
152	0.0112365	4.74418	0.0867726	1.57543	2.87757	0.0577124	13.8489	4.74866	54.5095	19.8412	87.3102	18.8803	176.355	27.859	44.5368	84.8139	118.02	581.692	11482.5	1.15458	0.753511	15.7158	1	0.5	412.706	6.41762	76.0423	330.246	51.4592	1.53226	0.718641	866.009
153	0.0177346	43.2484	0.165591	3.23686	4.26628	0.943685	15.1073	3.87253	36.4874	12.2094	48.2099	10.7598	104.491	20.1951	17.5916	19.4965	52.0681	335.181	8176.02	0.903694	0.239728	24.7618	1	0.5	303.211	46.6686	60.6771	195.865	4.19695	3.76967	0.374442	922.013
154	0.0116118	7.90909	0.169487	3.01943	4.64273	0.185477	20.7914	6.35363	76.3046	26.7763	114.505	24.6653	236.84	38.1504	11.1142	27.695	27.8987	749.985	9471.06	2.5631	0.967465	17.2855	1	0.5	560.324	11.1096	108.278	440.937	39.6896	2.6493	0.992697	877.298
155	0	8.09586	0.0159325	0.583022	1.54621	0.114842	6.51698	2.47197	31.5862	12.6102	60.0769	14.0069	144.365	23.7654	22.0044	26.1576	61.2065	354.144	11347.2	4.12596	2.2583	8.03142	1	0.5	305.755	8.69481	42.2362	254.824	29.3076	1.82702	0.427365	792.291
156	0.0119999	73.2042	0.260682	4.2789	6.4381	1.43702	22.8353	5.7626	54.4275	17.7051	68.2373	14.2866	133.225	23.0248	8.82387	28.9864	20.3352	485.397	7846.07	1.54781	0.401573	38.3661	1	0.5	425.136	77.7558	90.9006	256.479	3.29852	3.85436	1.42543	981.417
157	0.00579736	15.1588	0.102794	1.99482	4.14224	0.0807937	20.7225	6.87624	80.8521	30.281	129.805	29.5171	277.019	44.2222	21.2253	43.9705	54.8493	828.169	11043.9	6.63252	2.3528	10.5117	1	0.5	640.78	17.2622	112.674	510.844	29.5933	2.81899	0.801661	820.669
158	0.00556853	14.3318	0.0892451	1.84292	4.06924	0.10462	23.5435	7.16745	86.1653	29.4443	128.359	27.8222	249.617	39.6993	18.9675	37.1602	50.1022	818.167	10016	5.67098	1.71027	8.26636	1	0.5	612.261	16.2696	121.05	474.942	29.1921	3.31584	0.741689	795.26
159	0.101185	15.7799	0.196208	3.28497	6.2554	0.126334	26.7554	8.24444	94.7011	34.0185	143.571	30.9193	289.338	47.1455	23.3678	48.0533	58.9114	924.674	10051.7	6.74474	2.25761	21.3067	1	0.5	700.437	19.3623	136.083	544.992	28.1471	2.98755	0.815687	902.901
160	0.00597855	8.75081	0.0375922	1.5156	3.10437	0.0887183	12.9106	3.88899	47.2927	16.6521	74.2893	16.9933	150.823	25.4023	20.704	34.1954	55.819	471.451	10443.8	3.68418	1.38083	10.9407	1	0.5	361.755	10.31	67.2854	284.16	27.5616	2.66809	0.612612	825.015
161	0.121829	13.3587	0.798875	12.7346	17.9712	1.05224	64.1164	18.0088	183.524	61.6666	248.921	51.6073	455.004	73.679	15.6862	38.7624	39.0124	1714.08	8606.92	2.7185	1.03047	22.5635	1	0.5	1202.56	27.0141	284.672	890.878	32.9783	2.63812	0.993593	910.118
162	0.0106526	1.81736	0.152362	2.41107	6.6995	0.229115	19.4882	3.60221	24.2924	5.02717	13.823	2.33994	17.0179	2.06966	76.5373	45.8512	215.271	146.202	12022.3	0.14426	0.029056	25.3383	1	0.5	98.9805	4.39144	54.3114	40.2776	9.17185	4.96491	0.212993	924.995
163	0.02	5.86	0.05	0.62	1.44	5.50399	209.31	31.2681	213.971	56.481	200.195	39.8673	357.678	55.1676	41.5425	159.967	94.3019	1540.56	10457.5	7.5844	2.56786	11.6174	1	0.5	1177.43	6.55	461.492	709.388	108.304	2.95358	1.69633	831.604
164	2.61476	14.3636	1.69392	11.5408	9.32257	1.66534	18.7696	5.4819	61.4399	22.2195	99.4707	22.2119	205.208	32.9905	48.2731	46.9055	134.602	617.58	13266.5	5.83541	2.69716	2.61173	1	0.5	508.993	30.2131	96.6794	382.101	12.6469	2.16354	0.348475	688.188
165	0.0550425	1.11131	0.0661126	1.54359	5.55322	0.123223	40.8022	16.4025	215.509	83.9576	370.319	81.0892	737.767	118.888	96.6316	77.6366	262.37	2386.04	12009.6	0.604986	0.434105	8.02951	1	0.5	1673.19	2.77605	278.39	1392.02	501.439	1.39364	0.295905	792.266
166	0	0.0730835	0.00326921	0	0.261855	0.260682	1.85878	0.613718	5.62271	1.29647	3.9904	0.693276	5.46866	0.668633	7.2338	0.260333	21.2723	38.5386	8657.51	0.0547218	0.0233775	5.52651	1	0.5	20.8115	0.0763527	8.61775	12.1174	158.704	2.34079	0.0122381	755.234
167	0.0217003	4.71128	0.198767	3.2974	6.70602	0.321572	35.4679	11.6415	129.719	44.1943	182.778	36.2928	326.346	51.1405	135.231	136.684	358.199	1278.14	10651.3	0.821455	0.819749	8.55417	1	0.5	832.837	8.22915	183.856	640.752	77.8637	1.00208	0.381585	798.807
168	0.0235887	0.963759	0.0572995	1.75424	6.32571	0.125652	41.8558	16.8746	213.561	77.3142	323.256	67.923	589.401	90.8474	114.632	62.4174	312.856	2224.27	12168.8	0.835659	0.509074	7.6124	1	0.5	1430.28	2.79889	278.743	1148.74	410.428	1.64153	0.199508	786.816
169	0	3.51153	0.0624836	0.893653	2.32935	0.112102	11.711	3.95584	48.9266	18.1323	78.6506	16.9342	158.646	25.5002	31.7959	62.2243	77.0586	525.089	10521.9	0.741641	0.494226	22.6629	1	0.5	369.366	4.46767	67.0348	297.864	66.671	1.50061	0.807493	910.675
170	0.0117507	8.51818	0.174856	3.49232	6.36057	0.534876	28.4721	8.24793	89.3195	29.8581	121.584	24.7612	226.683	36.1921	32.4601	66.9542	74.2305	819.38	9866.53	0.917567	0.390284	15.2237	1	0.5	584.211	12.1971	132.935	439.079	35.9986	2.35102	0.901977	862.286
171	0	1.19565	0.0521942	1.24966	3.42746	0.196714	12.3531	2.17639	11.8176	2.01782	4.91966	0.72824	5.49919	0.770989	155.57	51.8029	423.891	69.0906	13466	0.111127	0.0110453	8.49532	1	0.5	46.4046	2.4975	29.9712	13.9359	5.57994	10.0611	0.122208	798.09
172	0	9.25787	0.0708062	1.91112	4.57321	0.410575	13.2771	2.90175	28.2168	9.49987	42.2783	11.0569	120.299	22.8125	103.581	115.393	250.906	298.084	12592.6	0.469458	0.301595	27.905	1	0.5	266.565	11.2398	49.3795	205.946	18.323	1.55658	0.459904	937.66
173	0.159196	20.0427	0.124799	2.11039	4.0338	1.0954	13.8371	4.48902	50.2005	19.3072	91.4509	23.1432	255.877	48.4926	45.9537	83.632	93.47	611.544	9277.32	0.657542	0.321808	23.7609	1	0.5	534.364	22.4371	73.6557	438.271	19.5333	2.04327	0.894748	916.704
174	0.123465	17.8445	0.824862	21.05	36.1142	3.93312	132.429	35.4745	351.555	111.389	414.168	79.3027	660.19	96.8457	60.9719	100.059	111.373	2735.18	6505.3	11.4248	2.87395	10.9202	1	0.5	1961.24	39.8429	559.506	1361.9	34.1817	3.97531	0.898418	824.811
175	1.40803	60.0866	0.993893	11.4876	18.4627	6.62383	60.4534	16.2011	158.888	49.9283	201.717	43.2079	420.016	67.6483	113.728	376.839	146.41	1446.72	9337.61	3.72431	0.83621	8.17545	1	0.5	1117.12	73.9762	260.629	782.518	10.578	4.45379	2.57387	794.119
176	0.0109079	23.6514	0.0811229	1.67666	3.41932	0.815647	11.8043	3.43217	34.4492	11.7012	47.3766	10.7695	105.301	18.215	52.9121	76.1354	89.6601	350.815	9661.39	0.738564	0.382855	8.26999	1	0.5	272.704	25.4201	53.9206	193.363	7.60671	1.92909	0.849156	795.306
177	0.00567733	20.5969	0.0941121	1.41139	3.1197	0.659907	16.7088	5.06246	61.0793	22.9606	104.899	25.2891	260.977	45.136	186.926	225.321	321.003	694.573	11223.3	1.3486	0.955422	2.46859	1	0.5	568	22.1081	86.6301	459.262	20.7734	1.41152	0.701929	683.498
178	0.00560849	30.5464	0.067395	1.02297	2.53089	0.541182	13.7931	4.69678	55.3751	21.0802	93.9456	21.7387	218.839	37.1225	20.7879	49.7823	28.9376	647.993	10322.2	1.72477	0.755027	5.32923	1	0.5	501.306	31.6424	76.9371	392.726	12.4114	2.28438	1.72033	751.767
179	0.00591591	21.9391	0.0406447	0.542281	1.60805	0.230544	9.19488	3.07747	37.7758	14.4161	65.6871	16.5483	170.061	29.9304	22.3618	24.9241	37.3493	451.038	11963.8	1.7706	0.937714	7.12037	1	0.5	371.058	22.5279	51.8867	296.643	13.1678	1.88821	0.667325	780.066
180	0	7.49248	0.0301277	1.06881	2.57868	0.445557	13.4119	4.48947	56.1636	21.2125	92.874	20.9015	200.622	34.8642	50.0206	42.8212	85.5713	603.643	9457.83	0.988421	0.510425	9.67343	1	0.5	456.155	8.59142	77.0892	370.475	43.1215	1.93647	0.500415	811.745
181	0	4.0077	0.00987044	0.136078	0.241798	0.20369	1.93662	0.766871	9.79448	4.28982	20.0162	5.04109	57.8505	11.6553	53.5369	55.0845	89.6591	128.547	9977.71	0.449014	0.546869	4.82481	1	0.5	115.95	4.15364	12.9435	98.8529	23.7991	0.821063	0.614377	742.403
182	0.105071	35.3273	0.918619	13.5916	14.2218	3.59883	37.3014	9.96485	91.538	27.9813	107.239	23.0058	215.767	34.3123	22.5764	59.5607	30.5325	802.334	8402.95	1.28297	0.45028	13.3814	1	0.5	614.873	49.9426	156.625	408.306	8.1755	2.84928	1.95073	847.438
183	0.0060083	16.1778	0.0686767	1.34054	2.72903	0.812093	9.73778	3.30796	33.6465	11.493	47.4429	10.449	94.1686	15.5963	20.5993	18.9266	34.9863	325.688	9234.02	1.41576	0.514198	15.7882	1	0.5	246.976	17.5931	50.2334	179.15	10.183	2.75334	0.540972	866.549
184	0.0114519	8.30428	0.0721018	1.31494	2.84783	0.392568	13.4558	4.48026	54.9168	19.6234	88.1697	19.8393	192.758	32.1697	38.5879	34.3478	65.5744	582.449	9494.12	1.37792	0.726014	11.0293	1	0.5	438.356	9.70277	76.0932	352.56	36.336	1.89793	0.523799	825.897
185	0.162653	35.0415	0.963427	12.6084	12.8256	3.9354	48.1337	13.4705	148.377	50.1457	204.144	44.8488	423.018	67.2012	74.2825	165.8	104.184	1410.16	8155.96	1.65701	0.701126	20.9158	1	0.5	1064.87	48.776	226.742	789.357	16.1833	2.36336	1.59142	900.589
186	0	26.2609	0.0331999	1.05537	2.70477	0.420977	13.2823	4.64974	58.1197	21.7234	100.672	23.7178	240.795	39.5829	35.5633	60.6394	53.7425	653.244	11190.2	2.77634	0.934101	8.26923	1	0.5	533.018	27.3495	79.1775	426.491	15.5941	2.9722	1.12833	795.296
187	0	9.19796	0.0172773	0.449536	1.08474	0.15695	5.57037	1.8446	22.6255	8.39548	38.4422	9.18483	92.0407	15.5497	16.0001	19.9817	24.841	255.601	10877	1.37646	0.534657	8.66545	1	0.5	204.56	9.66477	31.2821	163.613	16.9288	2.57448	0.804383	800.152
188	0.0106892	106.733	0.115399	3.18693	6.9868	2.36778	30.7793	10.2284	113.531	39.8175	175.217	41.4296	425.052	66.4743	20.489	732.29	848.882	1234.79	9144.16	18.1424	4.06029	5.16795	1	0.5	1021.93	110.046	163.893	747.99	6.79706	4.46824	0.862653	748.855
189	0.0108453	96.8312	0.338064	5.04782	8.56167	2.31308	34.7974	10.2506	112.843	39.1383	161.773	35.2173	333.295	53.6912	4.52264	348.292	138.324	1109.44	7972.36	2.53009	1.03859	14.471	1	0.5	894.108	102.228	168.766	623.114	6.09534	2.43608	2.51795	856.402
190	0.239179	93.4272	0.22434	3.33586	7.69487	1.85546	29.3535	9.49052	107.852	37.5366	167.852	38.6496	392.774	63.0413	7.91343	540.751	260.002	1120.56	9501.36	6.17242	2.40836	12.2329	1	0.5	953.326	97.2265	156.246	699.853	7.19817	2.56291	2.0798	837.334
191	0.179162	81.6806	0.181248	2.13661	4.05543	2.3258	22.0759	6.93254	73.6257	25.9148	115.652	28.4089	307.837	51.738	13.3195	441.601	567.022	866.747	9370.3	6.5259	1.45205	3.79102	1	0.5	722.744	84.1776	109.015	529.552	6.29088	4.49426	0.778807	720.389
192	2.99448	97.5357	0.902874	6.98143	8.35563	3.0021	33.1124	9.00729	93.5285	29.4978	118.811	25.4028	243.635	37.0571	8.73336	407.506	317.837	891.692	7359.51	4.63394	0.996915	4.52695	1	0.5	709.825	108.414	147.006	454.404	4.19136	4.64828	1.28212	736.491
193	0	155.295	0.21291	4.70436	10.2127	3.59855	49.0878	15.2983	168.97	61.0481	273.343	63.9916	654.259	108.344	12.785	649.049	461.23	1922.15	8572.2	11.6812	2.26252	6.51552	1	0.5	1568.37	160.212	247.167	1160.99	7.24654	5.16291	1.40721	771.232
194	13.2116	57.0414	2.51484	11.7953	3.08285	1.55496	12.6601	3.63679	38.2555	14.8179	65.5206	16.1888	175.42	32.5289	8.88288	308.646	363.183	484.422	10691.8	2.23073	0.4417	2.21121	1	0.5	448.229	84.5632	59.1902	304.476	3.60057	5.05034	0.849837	674.466
195	0.0402286	28.0437	0.0905493	1.76949	2.6296	1.67904	13.9891	4.46112	51.3051	19.1287	89.496	21.6524	246.671	44.6491	4.17355	95.7577	178.236	622.384	10350.1	1.63529	0.305174	3.94092	1	0.5	525.605	29.944	74.064	421.597	14.0795	5.35856	0.537254	723.865
196	0.0924966	26.7773	0.0440891	0.500528	1.44241	0.674118	7.15534	2.63004	32.9273	14.4263	82.6104	24.0903	318.507	68.4597	14.9511	261.363	675.92	551.206	10978.5	2.32757	0.49617	2.43819	1	0.5	580.337	27.4145	44.8292	508.093	18.5338	4.69107	0.386677	682.473
197	0.0381129	80.1277	0.197795	3.39491	5.42692	2.27903	18.9226	5.45268	55.2301	18.8469	77.0451	18.2118	180.028	28.9847	7.8641	336.41	290.376	588.174	8490.57	3.91628	1.14689	6.58804	1	0.5	494.186	83.7585	87.3113	323.116	3.85771	3.41469	1.15853	772.325
198	0	45.3046	0.0615403	1.50644	2.43848	1.34444	12.2438	4.08663	49.1567	18.8265	90.1839	23.0749	267.036	51.4677	12.7135	539.048	494.483	615.241	10605.1	3.79881	0.763322	2.75846	1	0.5	566.732	46.8725	69.27	450.589	9.61307	4.97667	1.09013	692.78
199	0.197318	10.2319	0.0720321	1.30725	3.23876	0.522588	14.8867	4.6065	52.8729	19.471	86.3945	20.2279	206.486	32.8671	2.86379	84.8058	116.442	558.715	8737.97	1.03371	0.594708	11.2567	1	0.5	453.382	11.8085	76.1275	365.446	30.9477	1.73818	0.728311	828.131
200	0.02	236.157	30.4184	156.289	37.7749	0.753131	71.6195	18.4175	186.851	61.5163	243.409	47.2593	403.784	58.8191	7.86036	223.67	315.568	1634.55	7372.15	10.6111	2.87022	24.6512	1	0.5	1553.09	422.884	315.416	814.787	1.92674	3.69698	0.708785	921.435
201	1.6213	169.594	1.55156	23.2301	35.9583	13.8371	129.663	34.3268	339.087	107.976	414.988	87.1313	807.479	124.351	12.1141	894.702	347.525	2978.35	7852.62	5.58697	1.20252	12.3215	1	0.5	2290.8	195.997	552.872	1541.93	7.86711	4.64606	2.5745	838.14
202	9.51019	30.6858	2.71507	17.0463	12.494	2.08506	59.2599	16.9272	184.691	65.6838	268.033	57.6604	531.399	83.3144	6.65556	203.075	268.044	1799.79	7934.27	2.68813	0.886693	8.57751	1	0.5	1341.51	59.9574	275.458	1006.09	16.7801	3.03164	0.757619	799.09
203	0.0611392	20.242	0.0471428	0.806909	1.75571	0.880491	10.4844	3.71742	49.3788	20.4644	105.28	27.9882	314.042	59.5185	2.97503	95.5088	117.624	650.126	9077.02	1.82929	0.713864	6.95817	1	0.5	614.667	21.1572	66.2168	527.293	24.9227	2.56251	0.811981	777.759
204	0.070949	32.8341	0.0808537	1.83626	3.34617	1.7243	16.1642	4.80685	48.6491	16.3467	70.1787	15.7233	164.857	28.8622	3.2389	104.702	127.663	521.417	9592.34	2.09366	0.485188	3.33098	1	0.5	405.481	34.8222	74.6907	295.968	8.4994	4.31515	0.82014	708.968
205	0.0161902	32.9019	0.0758434	0.840342	2.00229	0.974064	11.9139	4.1842	51.6729	19.7243	94.7205	23.6829	254.546	45.0623	5.22454	165.353	203.807	639.502	9944.66	4.3206	1.14209	4.81509	1	0.5	542.318	33.8343	70.7473	437.736	12.9377	3.78307	0.811325	742.215
206	0.267052	10.2779	0.261481	3.71991	5.38434	1.96363	20.8854	5.74392	64.453	23.3242	104.044	24.608	250.048	42.5836	9.24038	192.884	390.691	702.664	10116.8	2.18094	0.533711	4.1113	1	0.5	557.564	14.5263	98.4303	444.607	30.6071	4.08636	0.4937	727.686
207	0.00510529	23.1369	0.0437801	0.864955	2.02103	1.10793	13.562	4.50403	53.2819	20.1385	98.4763	24.1216	263.296	47.1841	6.23254	158.479	264.493	670.181	10837.1	3.40454	1.01687	3.70341	1	0.5	551.744	24.0507	74.4768	453.216	18.8442	3.34805	0.59918	718.305
208	0.0919044	55.5325	0.243703	4.47061	8.53131	3.10914	35.9398	11.1331	123.157	42.1251	179.049	40.8965	408.884	65.1745	6.96461	363.415	242.227	1241.98	9800.63	3.62542	0.914393	2.83709	1	0.5	978.338	60.3387	181.87	736.13	12.2	3.96484	1.50031	695.159
209	0.010529	48.5358	0.0811909	1.77775	2.90863	1.04374	14.2667	4.8059	56.13	20.452	88.6708	21.4702	229.385	36.8733	10.4508	453.699	377.905	599.276	9797.8	4.81224	2.37872	8.2029	1	0.5	526.411	50.4053	79.155	396.851	7.8732	2.02304	1.20056	794.465
210	0.154366	31.0455	0.177896	1.56315	3.11292	1.49787	13.4621	4.44153	50.8507	17.7616	78.9648	18.3857	190.282	32.6538	5.10904	169.938	198.935	547.069	9773.67	2.74367	0.703566	2.26309	1	0.5	444.354	32.9409	73.3651	338.048	10.2623	3.89966	0.854242	676.355
211	1.11683	27.7158	0.326483	2.26516	2.75646	1.13196	11.6322	3.51234	39.9649	15.44	68.511	16.9796	176.847	29.8727	1.87205	79.3767	67.3898	459.256	9257.9	1.06965	0.57752	5.77349	1	0.5	398.072	31.4243	58.9978	307.65	9.79021	1.85215	1.17787	759.434
212	0.0590545	61.6702	0.0923112	1.96363	5.0875	1.1326	27.8378	9.48415	118.895	47.0909	220.646	51.6225	524.77	86.0172	5.13556	210.38	185.84	1370.73	9685.34	3.99387	1.36307	5.70996	1	0.5	1156.37	63.7851	162.437	930.147	14.5825	2.93006	1.13205	758.368
213	0.0157379	79.2488	0.104705	2.81066	4.72162	1.92816	17.6945	5.23833	57.1825	18.4602	78.0753	17.9991	182.817	29.6145	6.82649	275.387	252.314	599.149	9275.55	3.74618	0.989569	4.15346	1	0.5	495.911	82.1799	86.7651	326.966	3.97866	3.78566	1.09144	728.611
214	0.618154	9.18882	0.21986	2.43407	3.76033	0.898954	24.8313	9.61921	130.201	54.8699	267.473	63.3909	659.517	109.976	10.7534	245.81	445.358	1648.47	7119.46	2.31308	0.748618	7.38895	1	0.5	1337	12.4609	169.311	1155.23	92.7081	3.08981	0.551937	783.796
215	0.0431435	27.6861	0.101571	2.7079	4.92354	2.87453	24.7201	6.57796	64.8615	20.4654	83.9434	18.9685	205.101	36.8934	4.90522	123.106	204.184	695.374	9863.41	1.81655	0.322476	3.66824	1	0.5	499.868	30.5387	103.958	365.372	11.9642	5.63313	0.602916	717.457
216	0.414606	23.2372	0.197973	2.08074	3.46858	1.78804	17.6024	5.35384	61.3139	22.4705	100.62	23.4716	242.963	40.7938	3.27214	122.249	123.425	680.707	8547.27	1.77528	0.527944	8.34408	1	0.5	545.776	25.9305	89.5268	430.319	16.5951	3.36262	0.990468	796.228
217	0.00543716	28.9629	0.0715114	1.53419	2.04838	1.31076	12.5369	3.82573	40.8791	14.9273	65.6981	15.3127	156.981	26.7654	3.96429	148.888	146.51	458.659	10110.8	2.41107	0.617335	4.56006	1	0.5	370.859	30.574	60.6009	279.684	9.14777	3.90561	1.01623	737.164
218	4.12685	40.6135	0.935814	5.52245	4.01032	0.990613	16.1967	4.6806	56.5059	20.9102	91.8625	21.96	225.896	38.1056	2.62485	94.2032	94.7572	631.084	9227.71	2.44342	0.782019	7.06303	1	0.5	532.317	51.1986	82.3842	398.734	7.78799	3.1245	0.994153	779.256
219	0.179388	14.9201	0.141845	1.6128	2.82334	0.296447	14.8574	4.73604	60.4496	23.1556	105.877	23.8336	237.718	39.043	7.77489	206.293	285.838	670.582	10074.3	2.65449	1.13738	3.64221	1	0.5	529.644	16.8541	83.1628	429.627	25.4909	2.33387	0.721714	716.825
220	0.027491	38.058	0.345296	5.62557	9.54403	2.83713	36.3867	10.8721	118.184	40.1774	163.284	35.1469	339.056	53.3865	1.78103	82.0938	57.3468	1081.05	7508.64	1.14071	0.471016	14.3912	1	0.5	852.931	44.0564	177.824	631.05	14.3237	2.42181	1.43153	855.764
221	0.341928	46.1582	0.174408	2.20587	4.75088	1.15609	21.2689	7.48749	87.5457	32.1026	150.531	34.4111	348.197	56.3696	3.20374	134.314	108.943	978.595	10619.9	3.17593	1.1051	7.51133	1	0.5	792.701	48.8804	122.209	621.611	12.717	2.87388	1.23288	785.459
222	0.0270657	58.9153	0.316838	5.5113	10.8195	4.62662	41.7508	11.3095	118.39	40.7272	166.115	37.1206	371.321	61.9094	5.73177	279.48	159.552	1173.27	7826.68	2.95869	0.566509	9.974	1	0.5	928.86	64.7705	186.897	677.193	10.4553	5.22267	1.75166	815.014
223	3.10184	55.8877	0.969856	8.0938	8.07137	2.30379	35.8568	11.4039	126.803	44.2017	185.839	40.7811	394.1	60.9238	6.07042	226.17	174.321	1267.01	8539.13	2.47752	1.37171	17.9741	1	0.5	978.338	68.0532	184.439	725.846	10.6659	1.80615	1.29743	881.995
224	0.133695	93.2334	0.94031	15	24.7246	7.62195	109.73	34.2746	367.909	129.006	533.04	115.699	1100.87	169.699	16.1635	645.487	419.014	3541.27	9073.07	3.49497	1.13443	12.2193	1	0.5	2701.88	109.307	544.26	2048.31	18.739	3.08082	1.54049	837.21
225	0.0203168	15.104	0.125212	2.65853	6.55616	1.57003	35.657	12.795	163.205	63.5763	296.247	69.6853	708.464	115.501	12.3857	264.437	364.271	1890.66	7704.67	2.66968	0.992385	6.53033	1	0.5	1491.17	17.9081	219.783	1253.47	69.9949	2.69016	0.725936	771.456
226	61.4346	169.818	15.6202	72.9926	16.7698	2.78828	31.6681	8.68292	100.545	35.9904	163.41	38.344	408.821	70.3124	20.6748	402.604	610.909	1114.5	10419	3.74928	1.45964	7.41263	1	0.5	1197.2	319.865	160.454	716.878	2.24119	2.56864	0.659025	784.119
227	0.1203	43.6487	0.178377	2.7944	4.30798	1.10703	18.6207	5.17335	57.4846	20.8371	91.4213	22.3969	227.858	38.3974	16.701	317.71	355.39	627.079	9711.72	2.30712	1.35288	8.53203	1	0.5	534.346	46.7418	86.6937	400.911	8.57715	1.70533	0.893977	798.538
228	0.00869878	41.4977	0.183772	3.075	6.5908	2.11439	28.3826	8.8814	105.858	36.6358	160.86	35.8647	365.796	56.957	7.78207	143.136	161.559	1064.14	8622.47	2.88735	0.964194	8.22029	1	0.5	852.706	44.7652	151.827	656.114	14.6568	2.99457	0.885969	794.684
229	0.22062	49.6014	0.377468	3.53769	3.44332	1.38412	15.6742	4.68033	53.2218	18.5423	85.2983	21.4186	235.862	45.4046	31.7705	671.557	657.723	607.622	10726.4	2.66496	0.745775	17.845	1	0.5	538.666	53.7372	78.4038	406.525	7.56507	3.57341	1.02103	881.125
230	0.0133703	40.8141	0.162008	2.21519	4.16022	1.04412	17.8477	5.46177	62.3033	21.6501	93.6363	21.3045	203.286	33.9475	3.7657	84.403	73.3722	627.846	8728.65	1.27962	0.496253	10.4844	1	0.5	507.846	43.2047	90.8172	373.824	8.6524	2.57855	1.15034	820.387
231	0.0218127	2.67507	0.248493	4.50257	6.5697	0.751057	27.8594	9.41925	112.389	44.0561	198.113	46.0759	457.878	76.0766	14.7794	159.62	324.329	1285.4	8948.17	1.07998	0.661801	8.3367	1	0.5	986.635	7.44794	156.988	822.199	110.393	1.63188	0.492153	796.136
232	10.4508	43.5761	2.66534	12.8237	5.28207	0.742238	18.7608	5.2363	58.1339	20.3059	88.6571	21.2795	216.856	34.5967	11.5444	189.701	230.889	596.767	9299.22	1.15204	0.831014	13.8002	1	0.5	539.366	69.5159	88.1553	381.695	5.49076	1.38631	0.821611	850.949
233	0.0894995	17.991	0.427283	7.13502	9.96898	3.49963	61.695	21.9546	254.886	95.9544	409.35	88.6307	845.495	131.001	12.8799	311.687	218.703	2637.75	8303.51	1.69057	0.679373	7.68534	1	0.5	1948.08	25.6428	352.004	1570.43	61.2426	2.48843	1.42516	787.786
234	22.9946	81.3858	5.52174	24.7816	8.31146	0.90965	23.4177	7.30389	85.5276	32.9941	150.793	36.0848	370.229	61.608	8.59296	175.671	149.929	967.785	9077.61	3.88891	1.09526	5.20232	1	0.5	911.864	134.684	125.47	651.71	4.83881	3.55068	1.17169	749.481
235	0.0416024	16.5127	0.240243	4.52762	6.85497	2.22142	31.3194	10.1246	112.329	40.1888	173.079	38.9301	378.289	60.3125	4.64571	100.958	80.2933	1161	8014.14	2.23449	0.68825	9.79504	1	0.5	874.972	21.3222	162.85	690.8	32.3982	3.24663	1.25737	813.077
236	11.4244	32.4451	3.40307	18.363	6.59074	0.571268	27.2543	8.64071	102.657	39.545	175.119	38.8389	381.797	60.8156	9.58995	108.671	188.152	1103.49	8543.73	2.27105	0.806375	3.50827	1	0.5	907.465	65.6356	145.714	696.115	10.6058	2.81637	0.57757	713.514
237	2.70898	25.1211	0.975025	6.1238	3.85014	0.864618	18.9526	6.88748	89.4207	34.6677	157.012	37.2539	379.019	62.0336	12.1261	190.427	218.958	1007.17	10699	6.08485	2.18174	2.40376	1	0.5	824.891	34.9289	119.976	669.986	19.1815	2.78898	0.869699	681.299
238	0.0683028	28.1125	0.0720526	1.07697	3.31022	0.906964	15.7968	5.70029	68.4909	25.5589	120.039	28.5023	304.026	51.7217	11.1005	173.236	189.131	769.658	10893.5	1.78592	0.785562	4.44054	1	0.5	653.383	29.3298	94.2051	529.848	18.0652	2.27343	0.915961	734.717
239	0.0104638	26.3749	0.197929	4.12673	5.64066	2.37123	24.6764	6.77174	79.3643	27.7817	122.937	27.7241	276.213	45.3654	3.77633	96.8614	60.3681	802.479	8764.28	1.03377	0.430937	5.33938	1	0.5	649.556	30.71	118.824	500.021	16.282	2.39889	1.60451	751.948
240	0.209457	18.8455	0.153439	2.15961	3.70658	0.984358	17.3601	5.63892	71.816	26.8338	120.723	28.726	299.742	50.1483	3.97266	74.7808	64.7408	789.688	7623.76	1.31045	0.449777	10.2911	1	0.5	647.047	21.368	99.5059	526.173	24.6244	2.91356	1.15508	818.377
241	0.00525622	0.9499	0.0389748	0.848487	3.48772	0.0532991	28.3708	12.7837	181.225	75.5476	349.209	80.2434	787.696	119.304	19.6006	82.0166	362.78	2171.18	11862	1.48622	1.12779	6.89981	1	0.5	1639.76	1.84262	225.92	1412	766.301	1.31781	0.226078	776.918
242	0	19.6627	0.0984392	1.99334	3.73084	1.03032	19.962	7.50065	97.2625	38.3579	180.819	43.2966	439.569	74.5009	27.3068	372.694	392.538	1162	9213.85	3.90597	1.94398	4.88603	1	0.5	927.785	21.7545	129.486	776.544	35.6958	2.00926	0.949448	743.581
243	0	10.2994	0.0463977	0.794268	1.71168	0.53496	7.49098	2.46281	31.0458	13.0988	67.0507	19.0871	227.679	45.4158	12.6457	91.7788	187.303	414.148	11496.6	1.50462	0.924551	3.49486	1	0.5	426.718	11.14	43.2462	372.332	33.4229	1.62741	0.490003	713.177
244	0	13.1414	0.024722	0.571143	2.39164	0.0450285	14.8725	6.41113	87.0068	35.7118	167.206	38.921	374.764	57.9518	28.4646	113.987	177.987	1038.35	12816.4	12.913	6.50305	4.68828	1	0.5	799.019	13.7373	110.727	674.555	49.1039	1.98569	0.640419	739.731
245	0.0161833	7.03959	0.083211	1.46278	3.08442	0.240951	12.7569	4.27095	48.4703	16.7842	69.4948	14.7232	137.164	21.0238	26.0814	45.4416	87.3715	480.769	9892.71	2.41773	1.18605	4.45425	1	0.5	336.615	8.60176	68.8235	259.19	30.1322	2.03847	0.520096	735
246	0.0108391	9.80933	0.0278285	0.521458	1.68935	0.0454716	8.44482	3.84211	52.7669	20.8227	99.3108	26.1018	279.171	47.7967	220.018	119.881	748.464	621.427	12512.4	3.756	8.51774	7.5761	1	0.5	550.361	10.3695	66.7886	473.203	45.6343	0.440962	0.16017	786.33
247	0.0585069	3.30885	0.240033	5.07144	6.12172	0.490058	13.2838	2.79213	17.8861	3.49168	11.5391	2.77788	27.8721	4.55088	110.081	293.651	313.411	106.156	12205.6	0.178166	0.061538	89.1796	1	0.5	99.4843	8.67882	40.5737	50.2317	5.78785	2.89522	0.936952	1114.25
248	0.0210017	13.1908	0.16258	3.60547	8.97717	1.88798	50.4785	16.7346	198.893	72.2639	310.52	68.2535	650.701	105.394	45.5367	123.115	124.089	2058.27	10729.5	1.71539	0.878254	12.8332	1	0.5	1501.08	16.9799	276.971	1207.13	71.092	1.95319	0.99215	842.705
249	0.0159572	16.128	0.0573213	1.02221	2.92305	0.380806	14.5707	5.1943	66.1987	25.4087	112.606	25.2983	253.476	39.8836	91.2324	143.109	245.577	725.029	10669.3	1.85836	1.24603	6.7165	1	0.5	563.163	17.2235	89.2676	456.672	26.5145	1.49142	0.582747	774.238
250	15.0595	37.1255	4.6006	26.5017	11.7542	0.697491	35.3754	9.58909	103.08	34.6066	136.368	27.8685	254.41	39.0941	12.3206	26.5521	31.1519	928.689	9232.03	2.66203	0.980467	16.1486	1	0.5	736.13	83.2873	160.496	492.347	5.91143	2.71506	0.852342	869.208
251	0.0107741	9.24157	0.196401	3.00913	4.68494	0.436576	15.0522	3.95156	39.3096	12.3043	48.879	10.5024	95.2661	14.7059	93.312	202.368	232.498	359.576	9207.08	1.61045	0.533683	12.6667	1	0.5	257.55	12.4579	63.4348	181.658	14.5818	3.01762	0.870408	841.235
252	0.031704	1.76385	0.190101	3.10437	7.00319	0.270596	31.4602	9.13847	86.3671	24.8705	94.6975	19.7259	184.269	26.9492	133.445	107.126	357.391	723.821	11973.3	0.72507	0.549894	34.6937	1	0.5	489.842	5.09003	134.24	350.512	68.8624	1.31856	0.299743	967.25
253	0.0052418	4.67638	0.0986627	1.83996	2.82784	0.219986	13.1703	3.85169	44.9716	16.3478	67.6515	15.5882	155.452	25.2589	6.0022	11.4099	15.0938	455.139	8420.76	1.38984	0.458975	27.4482	1	0.5	351.96	6.62024	65.0414	280.299	42.3397	3.02815	0.755933	935.475
254	2.84591	77.2332	3.61817	29.2881	20.2997	8.44898	58.7879	17.4586	172.428	49.7044	186.315	39.9453	382.813	54.3865	195.584	65.518	583.654	1491.62	11925.5	1.90896	0.837278	17.5583	1	0.5	1103.57	112.985	277.424	713.164	6.312	2.27996	0.112255	879.176
255	0.168828	3.02304	0.190442	2.08011	4.71494	0.268766	27.3908	7.1604	53.2734	11.9318	34.7122	6.38108	51.9493	7.08986	216.921	54.4081	593.79	361.914	12875	1.18209	0.882399	14.0842	1	0.5	210.335	5.46242	92.8083	112.064	20.5155	1.33963	0.0916284	853.283
256	0.0271169	3.75538	0.043311	0.93449	3.44158	0.116317	21.9293	8.10325	100.849	38.9818	176.907	41.7109	417.619	65.6211	178.338	112.726	469.567	1105.76	11094	1.94026	1.29969	12.9693	1	0.5	880.039	4.7603	134.439	740.84	155.629	1.49286	0.240064	843.894
257	0.00513621	8.74151	0.0527196	1.57205	3.0134	0.108878	16.5897	5.38251	65.9359	24.9631	106.541	23.778	227.187	34.1601	156.795	133.012	407.028	692.927	10130.7	6.30255	3.45925	10.6695	1	0.5	518.031	10.3714	91.0304	416.629	40.1709	1.82194	0.326787	822.283
258	0.00525777	0.81726	0.0632678	0.72345	3.88786	0.0441431	25.6208	10.3812	133.981	47.8099	193.009	39.1391	353.812	50.8229	70.6443	41.5708	184.085	1374.46	11640.1	0.745535	0.461613	11.0962	1	0.5	860.118	1.60923	173.915	684.593	425.415	1.61506	0.225824	826.558
259	0	11.4175	0.0857539	1.41222	2.5566	0.30268	12.0728	4.25752	50.8447	18.4397	79.531	17.5072	171.747	27.0527	77.1339	124.055	182.113	520.935	10100.7	2.61706	0.967551	13.6978	1	0.5	397.227	12.9155	70.0343	314.277	24.3333	2.70483	0.681197	850.099
260	0.0113454	13.3338	0.0769244	1.41774	3.042	1.00713	20.2234	6.58939	85.4997	32.4223	146.484	34.1177	344.216	60.0613	86.8203	125.883	199.41	939.927	9366.16	1.6947	0.70913	13.8031	1	0.5	748.502	14.8398	116.362	617.301	41.5975	2.38983	0.631279	850.973
261	0.0847407	6.58758	0.200502	3.51768	7.08445	0.701196	41.3837	13.6355	161.655	58.6313	255.41	55.5008	528.532	82.3382	176.959	187.966	359.194	1665.56	10153.3	2.27696	3.32552	8.46352	1	0.5	1215.26	10.3905	224.46	980.412	94.3566	0.684693	0.523301	797.7
262	0.00557934	7.44189	0.17506	3.58894	6.9553	2.40858	41.1803	12.9914	154.885	54.6349	221.642	46.8404	426.569	62.5528	34.3471	46.9654	71.0855	1441.05	7385.47	7.68086	3.25051	11.4426	1	0.5	1041.87	11.2115	218.42	812.239	72.4472	2.36297	0.660689	829.932
263	0.02	276.565	29.1266	130.294	29.65	3.57027	59.8151	15.3381	167.097	58.8103	244.282	50.4455	460.237	69.8971	131.414	173.577	259.422	1645.06	8454.16	3.58917	1.37086	4.41192	1	0.5	1595.15	436.006	275.471	883.672	2.02674	2.61818	0.669092	734.123
264	0.125342	16.2146	0.108992	1.20954	2.65568	0.356023	12.1825	3.69607	42.144	16.4381	77.3016	17.9426	182.406	35.8126	34.1021	114.469	51.766	498.321	11748.9	1.03872	0.33654	37.1627	1	0.5	408.594	17.6585	61.0343	329.901	18.6823	3.08647	2.21127	976.895
265	1.33105	44.2275	0.221787	1.82227	2.1665	0.620189	10.0274	3.76729	50.3439	21.7306	121.27	36.1394	448	87.5563	135.57	207.644	249.713	775.575	10867.3	3.96935	1.45763	6.15207	1	0.5	829.225	47.6026	66.9253	714.697	15.0138	2.72315	0.831532	765.598
266	0	14.0847	0.0284647	0.435297	1.00065	0.194695	4.72412	1.49665	19.6879	7.09349	33.5835	8.10288	86.4006	15.4447	22.7961	17.581	41.7385	216.521	9725.82	1.09817	0.147568	7.72162	1	0.5	192.278	14.5485	27.1041	150.625	10.3533	7.44183	0.421219	788.266
267	13.2007	43.1892	4.24383	21.9194	6.52226	1.63747	16.5284	5.05905	57.6201	22.3621	98.0054	24.0791	247.168	42.3045	100.819	82.2795	180.371	643.695	8389.68	1.40706	0.772963	109.7	1	0.5	603.84	82.5531	87.3672	433.919	5.25624	1.82035	0.456169	1151.28
268	0.0215816	16.7118	0.0521434	0.563337	1.46492	0.60524	8.30068	3.22682	45.4919	20.2218	108.156	29.7788	351.23	65.8807	336.007	154.196	596.751	632.621	10723.7	2.6943	2.3041	10.9877	1	0.5	651.706	17.3489	59.0895	575.268	33.1588	1.16935	0.258392	825.483
269	0.00520132	8.04316	0.040903	0.792575	1.83007	0.217974	9.28029	3.409	38.2298	14.2928	64.5596	15.9663	171.26	30.1582	130.998	82.5946	225.489	442.38	11507.4	1.3076	1.00218	9.28241	1	0.5	358.086	8.88184	52.9671	296.237	33.3532	1.30475	0.366291	807.369
270	0.141109	21.858	0.298555	4.19779	7.16608	1.36987	25.8172	7.06852	70.1016	24.5616	106.341	23.6916	240.928	38.6425	56.6775	102.595	84.869	723.367	8738.33	0.867511	0.426165	8.8286	1	0.5	572.183	26.4955	111.523	434.164	16.3864	2.03562	1.20887	802.1
271	0.588907	23.4787	0.268761	2.69237	3.39839	0.5664	11.5743	3.57234	40.3358	14.2034	62.2408	14.3735	142.206	22.9663	42.2914	59.7253	65.7922	422.137	9197.43	1.09312	0.40789	70.8462	1	0.5	342.466	27.0288	59.4473	255.99	9.471	2.67994	0.907787	1075.3
272	0.0534039	9.1054	0.024381	0.610494	1.45496	0.517114	7.91547	2.24132	25.9586	9.74025	46.1963	10.9259	111.415	19.7342	37.7386	55.5454	57.8682	291.919	9675.44	0.614061	0.148708	53.1817	1	0.5	245.893	9.79368	38.0875	198.012	20.2183	4.12932	0.959861	1029.71
273	0	10.2024	0.0242536	0.606628	1.08033	0.303694	4.25319	1.16378	13.1186	4.60486	21.7839	5.02265	53.5905	8.78696	15.8014	13.613	26.4795	146.066	8670.9	0.474532	0.234437	13.6218	1	0.5	124.542	10.8333	19.9196	93.7888	8.65749	2.02414	0.514095	849.464
274	11.2688	30.8852	2.44345	11.6661	5.12874	0.19052	17.7284	4.89814	51.3375	18.5976	78.0238	17.7255	180.673	29.5137	88.3458	75.2882	148.963	514.445	8023.21	1.7754	0.708284	5.06341	1	0.5	460.081	56.2636	79.2833	324.534	5.7681	2.50663	0.505415	746.927
275	0.00529323	11.7799	0.220456	3.86244	6.07178	1.11762	26.7398	7.69711	81.8145	26.8701	108.867	22.3538	208.687	31.4185	24.9231	32.3728	39.7132	747.004	9288.11	1.80928	0.754851	8.02239	1	0.5	537.506	15.8681	123.441	398.197	25.0941	2.39686	0.815165	792.175
276	0	12.2053	0.0239567	0.368196	0.679227	0.424497	4.44017	1.35422	15.8849	5.70404	26.3955	6.06892	65.6797	10.8065	21.2532	18.9048	34.9993	175.765	10684.9	1.13731	0.610054	3.34223	1	0.5	150.035	12.5975	22.783	114.655	9.10141	1.86427	0.540147	709.262
277	0	36.2195	0.0689351	1.67573	2.95152	0.593233	13.9914	4.63975	54.7278	19.5888	86.6197	18.7944	179.62	29.1084	21.9509	56.0706	22.506	562.406	9724.76	1.69039	0.512354	15.1322	1	0.5	448.6	37.9642	76.9037	333.732	8.79069	3.29927	2.49136	861.584
278	0.0231196	40.2963	0.335166	4.68779	9.05503	3.03332	37.2605	10.6517	117.495	41.5427	178.332	41.9992	424.759	75.4417	4.96754	213.288	152.642	1244.04	9958.32	1.75746	0.635808	6.35994	1	0.5	984.912	45.3424	177.496	762.074	16.8071	2.76413	1.39731	768.852
279	0.0181709	19.9545	0.179153	3.35604	5.26909	2.38768	24.8805	7.73487	88.5518	32.6089	151.682	35.9542	387.986	70.6147	4.98054	184.148	155.078	994.364	8894.85	2.17165	1.12526	5.26949	1	0.5	831.177	23.5079	128.824	678.846	28.8773	1.92991	1.18745	750.697
280	0.00551809	2.43321	0.0545256	1.43039	4.36756	0.176024	25.1883	8.84094	110.152	40.5522	184.563	40.8035	378.188	66.0354	6.5613	101.337	249.004	1137.92	11555.8	1.76097	1.0124	9.39186	1	0.5	862.792	3.92364	148.725	710.143	180.991	1.73941	0.406971	808.609
281	0.00474583	35.2556	0.0298701	1.09678	2.54263	1.34943	18.2779	6.3615	84.4144	35.9975	183.637	48.3679	555.902	111.979	13.5203	240.678	456.81	1216.27	10988.1	5.70635	1.24568	3.04994	1	0.5	1085.22	36.387	112.946	935.884	25.7203	4.58093	0.526867	701.335
282	8.3552	35.7332	2.29636	11.4284	4.32036	0.259282	18.2547	6.47699	90.834	36.91	179.962	44.5968	458.461	83.4013	16.0642	331.591	518.826	1121.5	11909.8	4.99325	2.17264	2.0763	1	0.5	981.289	57.8131	120.145	803.331	13.8953	2.29824	0.639118	669.379
283	0.00542583	31.3568	0.0408522	0.743649	2.51029	0.564057	14.4349	5.99489	76.0082	30.9205	145.74	35.605	364.299	62.7911	12.3099	194.453	404.401	905.739	11331.7	3.72318	2.11559	3.28214	1	0.5	771.015	32.1467	99.5123	639.356	19.8887	1.75988	0.480842	707.68
284	0.00560161	14.5181	0.0325136	0.617436	1.63678	0.682745	6.81879	2.51119	31.1582	12.3421	58.2526	15.9041	184.393	36.3984	11.2156	160.573	280.568	381.684	12683.3	0.382295	0.419569	4.85498	1	0.5	365.272	15.1737	42.8077	307.29	20.2515	0.911162	0.572313	742.985
285	0.0108702	10.4492	0.02842	0.994567	1.83695	0.866697	8.55084	3.32999	44.4242	19.4882	103.313	28.5351	337.898	71.002	13.7462	158.704	347.939	614.935	10621.2	0.758869	0.822559	5.18998	1	0.5	630.727	11.483	59.0087	560.235	48.7881	0.922571	0.456124	749.257
286	1.87525	79.6664	4.96534	36.6764	28.54	10.1521	60.0905	18.2772	182.544	56.9746	238.965	56.4443	600.715	109.667	28.1246	667.784	564.655	1780.62	10987	4.48815	1.52815	15.7513	1	0.5	1485.55	123.183	299.604	1062.77	8.62751	2.93699	1.18264	866.275
287	0.005696	27.3705	0.0594751	1.35183	1.95626	0.635318	10.9163	3.59901	39.5251	14.2043	60.7049	13.8437	135.55	23.0508	2.3245	67.6334	42.964	413.885	9517.76	0.924895	0.464923	10.6458	1	0.5	332.773	28.7875	56.6319	247.353	8.59239	1.98935	1.57419	822.042
288	0.997783	154.922	3.30411	24.983	25.2834	8.08062	75.3442	23.7146	246.718	81.1917	324.736	68.2998	621.748	99.9876	32.1331	1115.03	498.697	2253.87	9289.96	12.8802	4.10392	10.7692	1	0.5	1759.31	184.207	379.141	1195.96	6.49249	3.13851	2.23589	823.295
289	0	48.3017	0.0863352	2.27108	4.64842	1.60269	26.991	8.92454	110.502	41.296	178.759	41.5435	385.8	62.8082	6.86183	141.531	137.866	1180.06	10140.7	4.44744	1.71247	3.62008	1	0.5	913.535	50.6591	152.669	710.207	14.0193	2.59709	1.02658	716.285
290	0.0258822	22.936	0.0752414	1.41436	3.27094	0.427444	20.8942	8.53173	109.086	40.625	183.347	42.3104	416.55	73.5162	30.3365	485.924	649.402	1186.99	11162.8	13.9148	6.34462	3.5198	1	0.5	923.01	24.4515	142.21	756.349	30.9327	2.19317	0.748264	713.803
291	0	16.2232	0.0617278	1.25443	2.97376	0.560891	12.6894	4.63936	53.4801	20.123	93.292	22.1765	231.888	41.4555	5.43428	86.157	115.817	608.64	9222.84	1.37879	0.759228	15.6534	1	0.5	500.818	17.5393	74.3435	408.935	23.3153	1.81604	0.743908	865.542
292	1.61599	17.7426	0.551625	3.46422	4.11244	0.583008	17.3818	6.34489	73.1197	27.7769	127.054	29.6952	299.283	51.7134	6.89845	96.6459	145.701	812.715	9296.79	1.92852	1.09993	13.1548	1	0.5	660.439	23.3745	101.542	535.523	22.9106	1.75331	0.663317	845.5
293	65.6476	148.141	15.6756	69.482	16.8364	2.22629	37.002	10.8542	123.193	45.7485	209.78	51.1995	509.812	91.4534	7.23459	135.284	130.668	1367.31	9914.21	1.35242	0.543371	1.92947	1	0.5	1397.05	298.946	190.111	907.994	3.03732	2.48895	1.03533	663.521
294	0.00552707	2.53496	0.0641964	1.84911	3.61188	0.248802	23.2925	9.71649	122.612	48.9061	226.398	51.9749	510.654	89.8017	11.2384	104.622	243.348	1370.2	10669.9	1.63618	0.741262	9.84105	1	0.5	1091.67	4.45379	159.482	927.734	208.302	2.20729	0.42993	813.578
295	6.60828	37.9351	1.81891	8.39113	3.46676	0.474105	12.9959	4.52322	61.3338	24.8593	116.621	28.5842	296.173	54.1849	14.9818	221.987	277.355	729.315	10993.6	1.83731	1.13622	19.3703	1	0.5	657.969	54.7535	82.7937	520.422	9.50482	1.61704	0.800372	891.098
296	0	17.3248	0.0272308	0.783538	1.6465	0.584637	8.94099	3.28907	44.1499	17.3942	81.9114	20.0218	206.479	37.975	1.9218	31.4661	34.5552	524.539	9168.53	1.10449	0.345425	10.6914	1	0.5	440.528	18.1356	58.6111	363.781	20.059	3.19747	0.910602	822.506
297	0.032174	28.2747	0.136736	1.56411	2.60237	1.07005	15.5369	5.72314	76.3001	31.3813	164.535	42.2638	468.023	91.3001	13.3415	247.725	230.509	1009.74	10704.2	4.04426	1.17563	5.36123	1	0.5	928.743	30.0078	101.232	797.502	26.5765	3.44007	1.07469	752.336
298	0.00568537	28.5242	0.0725742	2.28934	4.50104	1.90798	25.2492	7.84494	90.2219	32.2692	137.494	30.5783	285.157	47.9576	3.5038	103.218	45.4375	913.729	8944.98	0.717034	0.333644	4.01958	1	0.5	694.073	30.8918	129.725	533.456	17.2685	2.1491	2.27165	725.645
299	0.183809	11.367	0.530318	8.83283	10.7519	0.82413	40.1225	10.8166	114.799	38.8473	154.884	33.0578	301.71	50.9292	5.3512	111.856	77.0382	1037.39	8161.59	0.824974	0.423142	22.769	1	0.5	777.656	20.9139	177.314	579.428	27.7054	1.94964	1.45195	911.267
300	0.033352	36.5034	0.070985	1.2447	3.05311	0.859938	16.7016	5.95052	75.3026	30.4274	147.754	36.9099	389.938	71.3624	16.8138	214.373	277.334	919.322	10447.4	4.88606	2.90759	4.11366	1	0.5	816.112	37.8525	101.868	676.392	17.8692	1.68045	0.772978	727.738
301	0.0230023	17.7788	0.19025	3.54618	5.65062	1.41162	28.007	8.5673	93.8756	33.608	146.414	32.1824	313.234	53.0077	7.59668	123.974	115.258	993.056	9850.86	0.647974	0.442256	11.4572	1	0.5	737.497	21.5382	137.512	578.447	26.8568	1.46515	1.07563	830.072
302	0	15.5273	0.0917273	1.4626	2.39929	1.38554	14.2019	4.90415	57.8245	21.7853	100.575	24.4893	260.745	47.5131	3.89434	68.7666	55.9492	651.613	7749.18	0.828806	0.379001	12.6457	1	0.5	552.905	17.0817	80.7154	455.108	26.6431	2.18682	1.22909	841.049
303	0.292779	14.636	0.473013	3.37834	2.40961	1.05474	6.20656	1.8359	22.8117	8.69979	47.3464	13.6096	170.01	40.6453	12.7369	87.9393	197.627	303.019	11457.1	0.85122	0.255902	2.59336	1	0.5	333.41	18.7802	34.3185	280.311	14.9259	3.32635	0.444976	687.598
304	0.0171118	18.6368	0.0827357	1.68805	2.71427	0.523981	13.2644	4.35614	52.9593	20.9673	99.996	24.2342	256.361	47.7476	12.7127	169.576	160.309	626.143	10882.3	1.49286	0.872451	1.6513	1	0.5	543.549	20.4247	73.818	449.306	21.9982	1.71111	1.05781	651.324
305	3.38862	31.0524	1.38481	8.43959	5.22402	1.77196	14.7421	4.93241	53.2974	18.3651	81.6228	19.8109	206.105	39.3685	64.3478	571.617	849.002	562.014	11779.2	1.32058	1.01351	4.25147	1	0.5	489.505	44.2654	79.9679	365.272	8.25186	1.30298	0.673282	730.734
306	0.257446	11.4433	0.159184	2.04439	2.55064	0.642378	11.3428	3.42656	41.9288	14.6041	67.2104	15.8295	163.444	29.3321	37.2768	196.346	517.749	447.717	11138.4	1.03767	1.02014	3.91641	1	0.5	364.216	13.9043	59.8911	290.42	20.887	1.01718	0.37923	723.304
307	0.00571016	16.5866	0.0298248	0.688161	1.95855	0.497853	8.88274	2.64539	29.9244	11.0428	48.6614	11.2363	109.981	19.644	5.2396	59.1032	61.2914	325.944	10926.6	0.425828	0.31551	13.8933	1	0.5	261.785	17.3103	43.9089	200.565	11.5865	1.34965	0.964298	851.719
308	0.0167973	26.1053	0.379431	6.447	13.9603	1.89835	61.5486	17.8376	185.672	60.2429	233.344	46.4541	392.26	59.1693	8.81007	110.858	80.9463	1572.42	8831.37	2.97771	1.67269	9.86838	1	0.5	1105.33	32.9485	280.917	791.469	24.0214	1.78019	1.36953	813.874
309	0	14.9029	0.0424549	0.946848	2.09943	0.31156	11.776	4.17368	51.1144	18.8755	80.8957	18.1916	168.247	26.7332	5.67759	39.9515	60.3039	514.003	10220	4.20445	2.90173	3.96099	1	0.5	398.31	15.8922	69.475	312.943	19.6916	1.44895	0.662504	724.322
310	0.0473671	13.852	0.254172	3.05953	5.84279	0.667308	25.7697	8.71355	99.2599	37.299	159.518	36.6814	353.725	58.2666	14.5599	107.639	90.4661	1021.97	8358.81	1.26659	0.769336	4.45237	1	0.5	802.957	17.2131	140.253	645.491	37.5	1.64634	1.18983	734.961
311	0.00575825	2.23112	0.0801938	1.8929	3.32347	0.779392	13.4496	3.99695	47.5257	16.428	69.1095	14.7602	145.948	24.5577	4.34318	20.417	30.2262	461.569	8888.54	0.537421	0.38348	8.72685	1	0.5	344.088	4.20997	69.0751	270.803	64.3243	1.40143	0.675474	800.889
312	0.0121616	13.2139	0.0423236	0.873681	2.63291	0.707875	19.0697	7.22387	99.0479	39.047	187.407	43.949	437.87	76.9741	10.7142	57.3621	67.5254	1118.65	10036.5	1.52538	0.638568	22.9242	1	0.5	928.072	14.142	128.682	785.247	55.5258	2.38875	0.84949	912.13
313	64.7394	161.008	24.7749	137.746	33.3906	1.95338	42.9636	8.45468	75.3832	22.8717	90.2356	18.8178	172.461	28.7212	11.1611	51.6188	73.8037	618.212	8647.81	2.43371	0.988466	4.02626	1	0.5	883.521	388.268	162.145	333.107	0.85793	2.46211	0.699406	725.795
314	0	4.07777	0.0392648	0.678565	2.47046	0.116342	17.1867	6.32909	81.933	31.1884	143.187	32.7802	321.003	53.833	26.9813	65.1397	146.869	879.651	12088.4	1.40873	0.895065	12.0394	1	0.5	694.823	4.7956	108.036	581.992	121.359	1.57389	0.443523	835.558
315	1.19969	31.8476	4.93514	35.9986	27.2735	9.48442	51.6627	15.2145	159.714	48.2136	198.868	47.6499	463.638	73.4306	233.649	151.902	825.761	1390.92	13343.6	1.32182	1.15851	28.5691	1	0.5	1169.13	73.981	263.349	831.8	11.2434	1.14096	0.183954	940.788
316	0.033851	5.30986	0.176938	2.10179	4.08131	0.555568	14.023	3.42206	34.1798	10.7898	40.7265	7.9	68.3646	10.4901	6.73391	22.2297	17.852	287.755	10771.7	0.7216	0.206057	20.2004	1	0.5	202.155	7.62244	56.2618	138.271	18.14	3.50195	1.24522	896.267
317	0.153132	8.12951	0.28255	4.68577	7.55608	0.950897	29.559	8.59883	94.8323	31.9943	128.014	26.5336	237.157	38.9926	31.7154	75.9313	88.0226	875.882	9639.09	1.8067	0.777256	3.32983	1	0.5	617.44	13.251	141.497	462.692	34.9176	2.32446	0.862634	708.938
318	0	8.58844	0.0352892	0.645233	1.21034	0.0799684	7.64679	2.70354	35.1486	13.6589	65.9215	15.9969	155.205	27.0361	28.0151	30.3096	81.4655	390.849	12052.1	3.67866	1.5992	5.30023	1	0.5	333.876	9.26896	46.7892	277.818	29.973	2.30032	0.372054	751.249
319	39.4698	152.015	25.7681	138.017	35.1754	2.32722	52.6132	11.0184	101.401	30.587	114.993	22.7435	201.38	30.8337	27.9535	48.225	73.383	856.529	9820.58	1.36651	0.711853	13.3282	1	0.5	958.342	355.27	202.535	400.537	1.12741	1.91965	0.657169	846.985
320	0.00587217	6.99469	0.0442997	0.784278	1.58006	0.126964	9.44216	2.83573	36.7455	13.2317	58.2153	12.6739	126.821	21.0572	7.48528	15.7311	19.9806	378.215	9808.35	1.85446	0.716778	14.2468	1	0.5	290.558	7.82914	50.7305	231.999	29.6327	2.58721	0.78732	854.603
321	0.00595366	6.09163	0.0483584	0.815155	1.50932	0.139835	8.85372	2.95326	35.7095	12.769	58.3499	13.0455	128.826	22.093	8.13409	13.0163	22.2129	371.71	10463.9	1.75271	0.768976	11.7047	1	0.5	291.21	6.96109	49.1656	235.083	33.771	2.27928	0.585979	832.431
322	0.0388564	4.76578	0.338616	4.695	7.33297	0.51026	27.5611	8.1361	81.8501	28.901	115.423	24.7027	223.776	37.6684	5.88348	14.217	15.234	772.102	8824.66	1.44014	0.52735	23.6493	1	0.5	565.7	9.83826	125.391	430.471	43.7548	2.7309	0.933239	916.102
323	0.00534287	43.206	0.0310613	0.868312	1.42955	0.44618	6.80747	2.44866	28.0568	11.6142	55.4056	14.5767	162.395	31.8076	27.8177	73.4671	71.7074	350.914	11318.3	2.19798	0.996403	11.9235	1	0.5	359.098	44.1107	39.1886	275.799	6.25243	2.20592	1.02454	834.483
324	0.105352	5.92769	0.726785	10.7616	14.5175	1.21567	50.1174	13.7101	140.869	45.2551	175.01	35.5799	320.917	50.323	7.02274	20.3054	17.2564	1206.25	8249.36	1.10185	0.422371	28.3698	1	0.5	865.037	17.5215	220.43	627.085	35.7895	2.60873	1.17669	939.855
325	0.0175004	11.8519	0.118452	2.17635	4.27822	0.175364	19.0993	6.29242	72.0106	26.4684	115.597	24.9103	236.255	37.8301	21.3406	44.6921	55.8522	729.771	10452.6	4.75773	1.79071	9.03055	1	0.5	557.08	14.1642	101.856	441.06	31.139	2.6569	0.800184	804.471
326	0.00545991	18.4571	0.123607	1.82469	3.67893	0.0870276	19.8887	7.84421	98.8185	38.8683	175.724	41.1925	398.777	65.7184	78.5294	111.425	223.646	1070.21	12392.4	17.7245	6.91856	4.11194	1	0.5	871.008	20.4109	130.317	720.28	35.289	2.56188	0.498221	727.7
327	0	27.6104	0.0735465	1.47806	3.72775	0.428925	19.4566	6.25689	72.3789	25.6719	113.886	25.4978	243.746	40.9996	172.642	295.798	447.27	780.739	11221.2	2.95766	2.6677	5.49672	1	0.5	581.212	29.162	102.249	449.801	15.4242	1.10869	0.661342	754.717
328	0.0058823	5.96025	0.136501	1.83198	2.98258	0.259691	16.8813	4.8986	57.4208	18.6886	77.7873	16.3945	150.679	23.4088	29.1268	46.2054	75.5242	542.772	10051.3	1.8356	0.788649	22.5252	1	0.5	377.336	7.93462	82.4429	286.959	36.1654	2.32753	0.611796	909.902
329	0.0056201	1.98629	0.0685004	1.64528	3.41623	0.121189	16.0566	3.07917	22.0968	4.74234	13.5772	2.2195	16.8438	2.43623	80.0035	55.9128	227.453	140.178	12673.5	0.137916	0.0786606	21.9103	1	0.5	88.2947	3.70569	44.7699	39.8191	10.7454	1.7533	0.245821	906.408
330	0.0108952	3.26541	0.135967	3.17302	6.49984	0.169098	18.2053	3.99717	32.8435	7.58414	21.9773	3.36847	24.7422	3.1511	53.2104	61.5231	142.077	231.927	11754.9	0.403407	0.20754	19.5027	1	0.5	129.123	6.5853	61.7149	60.8232	9.23621	1.94376	0.433028	891.934
331	0.0219859	0.829123	0.0382727	0.851363	3.38638	0.0978985	27.4348	11.9235	146.544	51.0074	201.969	41.5806	373.086	58.5966	116.506	49.7093	329.872	1457.55	12624.7	0.795474	0.637621	7.72758	1	0.5	917.367	1.74074	189.387	726.239	417.2	1.24757	0.150693	788.345
332	0.0272952	0.945817	0.0666407	1.37766	4.93368	0.0768302	38.1953	15.1838	192.862	74.2985	317.742	68.3973	608.759	100.341	82.9565	59.5944	226.235	2087.59	12357.7	0.55788	0.56657	11.145	1	0.5	1423.21	2.41742	251.252	1169.54	483.797	0.984662	0.263418	827.038
333	0.0590413	3.46301	0.0686092	1.79778	3.89866	0.090627	22.3218	7.5219	92.3755	34.56	150.145	33.0794	308.014	51.921	110.11	131.031	282.593	966.322	11901.2	1.30049	0.782301	11.5296	1	0.5	709.317	5.38844	126.208	577.72	107.215	1.66239	0.463675	830.766
334	0.0332866	9.36964	0.2308	4.01344	5.60775	0.67554	22.2197	6.38703	69.2393	23.0948	92.2092	19.7153	180.004	29.7972	26.7152	61.9191	62.222	638.282	9317.27	1.30054	0.57999	23.1782	1	0.5	462.597	13.6472	104.129	344.82	25.2668	2.24235	0.995133	913.532
335	0.0440751	1.78155	0.0992198	2.45326	6.3157	0.139527	41.7469	15.6744	198.033	73.7326	314.307	66.7387	605.82	97.7075	95.4431	84.8125	251	2056.02	11816.2	0.981633	0.68218	11.6432	1	0.5	1424.59	4.3781	261.91	1158.31	264.568	1.43897	0.337898	831.848
336	0.0232353	3.04404	0.0235969	0.258618	0.362434	0.196595	3.64799	1.39937	20.3798	8.36386	43.1389	10.6484	115.304	20.2952	11.111	3.67985	30.7453	268.287	11243.8	0.299143	0.193351	6.85266	1	0.5	227.086	3.34949	25.9862	197.751	59.039	1.54715	0.119688	776.234
337	0.145153	17.0109	0.560872	5.31382	8.60085	1.52878	36.8097	12.4034	135.959	47.856	204.777	46.1081	439.999	75.6605	112.277	113.443	295.221	1350.81	11586.8	1.30046	0.807313	15.9726	1	0.5	1032.73	23.0307	195.302	814.4	35.3615	1.61085	0.384264	867.915
338	0.241519	23.0056	0.11092	1.72472	3.10107	1.27117	16.3642	5.85398	70.2769	28.1676	131.293	31.7299	335.893	65.2997	40.1095	72.6226	94.7968	804.568	8735.01	1.31418	0.485501	6.77142	1	0.5	714.334	25.0827	96.8674	592.384	23.6172	2.70684	0.766087	775.047
339	0.396813	14.4091	0.66188	5.13905	6.38545	1.57048	26.2134	9.17076	109.044	39.5339	169.757	38.0948	365.118	62.0796	173.984	204.548	409.308	1105.21	10104.7	2.24216	1.49694	3.58187	1	0.5	847.574	20.6068	152.384	674.583	32.7359	1.49783	0.49974	715.346
340	0.0328437	2.2358	0.136642	1.49009	3.43206	0.431135	14.8365	4.62127	41.4244	12.8336	47.3121	9.45315	88.3607	14.2244	143.112	55.4546	366.761	362.754	11980.6	0.491644	0.28763	13.1143	1	0.5	240.825	3.89538	64.7453	172.184	44.2021	1.70929	0.151201	845.151
341	0.02	5.86	38.01	173.544	46.773	7.35645	68.1962	17.7867	172.224	53.6858	224.333	49.2708	473.451	81.4558	66.6317	105.017	144.881	1609.33	9349.76	2.3153	1.10011	14.8707	1	0.5	1411.97	217.434	312.337	882.197	4.05731	2.10461	0.724849	859.557
342	0.149656	26.2126	0.607857	6.10923	6.39769	2.46128	22.0968	7.10204	83.4834	27.2344	116.637	25.7473	250.798	41.8191	100.816	124.539	222.043	792.619	10945.8	2.38942	1.19037	11.6219	1	0.5	616.856	33.0794	121.541	462.236	13.9735	2.00729	0.560877	831.646
343	0.152437	3.99374	0.308036	4.81641	9.70842	3.22875	50.0293	15.3196	166.725	56.0683	221.846	43.8869	388.468	63.3942	30.5654	47.0769	63.9496	1511.96	8369.04	1.79951	0.793978	11.0607	1	0.5	1027.95	9.27062	245.011	773.664	83.4533	2.26645	0.736156	826.207
344	0.016531	8.73008	0.0383974	0.836032	1.20065	0.697603	7.5589	2.10176	21.1985	6.71971	26.5502	5.66143	54.1593	8.9622	34.7022	48.7078	69.9029	190.498	10044.7	0.714434	0.336432	7.13864	1	0.5	144.431	9.62104	32.7574	102.053	10.6073	2.12356	0.696793	780.324
345	0.195552	9.87917	0.735403	5.56715	5.58971	1.2147	16.0659	5.56377	64.0298	22.9982	100.537	24.6239	249.054	42.451	78.3267	63.1411	172.839	690.086	12256.3	1.52651	1.31405	6.9434	1	0.5	548.505	16.3773	92.4639	439.664	26.846	1.16168	0.365318	777.547
346	1.75182	17.5268	0.876587	5.00057	2.95572	1.07708	12.7825	3.77004	44.5674	17.1365	78.342	18.0993	180.803	31.7962	83.2303	72.8962	173.381	511.11	9515.25	1.89782	0.747198	85.6339	1	0.5	416.486	25.1558	65.1528	326.177	12.9663	2.53991	0.420439	1107.22
347	3.18933	90.7404	10.2631	74.2174	56.1272	19.8329	97.7379	25.7669	228.748	57.6719	202.063	43.5212	400.34	67.7319	221.756	487.978	410.999	1633.43	11291.6	2.005	0.647082	18.4776	1	0.5	1377.95	178.41	428.213	771.328	4.32334	3.09852	1.1873	885.34
348	0.00572502	10.0488	0.0332121	0.666142	1.13881	0.41405	4.91654	1.46112	17.0021	5.89824	26.5314	6.02985	60.9855	10.6782	58.4954	76.0487	100.013	178.737	7995.02	0.56172	0.294334	12.4923	1	0.5	145.81	10.7539	24.9326	110.123	10.2403	1.90844	0.760386	839.68
349	0.0684423	30.3268	0.272734	2.22552	3.10883	0.974785	11.6114	3.39981	38.8297	13.298	61.4123	15.0088	158.803	29.8083	266.783	261.002	468.672	427.999	11177.2	0.889417	0.526421	2.53818	1	0.5	369.148	32.8935	57.9246	278.33	8.46155	1.68956	0.556896	685.805
350	0	6.22282	0.0282717	0.614703	1.14103	0.0609061	7.80356	2.48826	32.5175	12.6278	57.4005	13.6211	136.156	24.0977	79.6832	85.5899	138.796	367.955	11886.8	1.41956	1.14496	6.2674	1	0.5	294.78	6.86579	44.0112	243.903	35.5243	1.23984	0.616659	767.414
351	0.0236412	19.6661	0.305084	4.85202	6.36332	2.07494	26.1825	7.40985	79.358	27.3714	120.216	26.909	262.45	46.0656	14.6529	24.0985	23.499	798.418	7963.44	0.579696	0.164455	4.74895	1	0.5	629.248	24.8468	121.389	483.012	19.4396	3.52495	1.02551	740.926
352	0	2.36321	0.0403547	0.95285	2.39798	0.266626	12.2006	3.88833	44.1953	15.1429	63.046	13.5053	127.462	21.5314	221.426	145.86	401.465	456.604	10680.3	0.766244	0.748192	4.87986	1	0.5	306.993	3.35642	62.9488	240.688	71.7097	1.02413	0.36332	743.463
353	0.0234704	10.7346	0.0408452	0.762979	3.24987	1.04149	23.8947	8.22163	99.0343	36.2414	161.023	35.4119	343.52	59.5525	141.04	113.963	239.915	1073.17	10110.9	2.03844	0.766584	7.67791	1	0.5	782.753	11.5619	135.442	635.749	54.9864	2.65912	0.475016	787.687
354	0	11.0504	0.020813	0.422661	0.922923	0.12015	4.32814	1.75105	23.4664	9.96047	51.9668	14.4674	165.118	33.1251	48.837	72.6072	77.0868	326.413	12232.2	1.08209	1.15797	3.13046	1	0.5	316.721	11.4939	30.5887	274.638	23.8943	0.934477	0.941889	703.579
355	0	21.2852	0.0586828	0.793121	1.68563	0.205388	9.21085	3.13141	35.7609	13.5105	60.9339	13.8822	141.49	24.8769	26.5478	42.1271	42.6262	395.271	11928.1	1.03797	0.577708	5.00391	1	0.5	326.824	22.137	49.9941	254.693	11.5053	1.7967	0.988292	745.815
356	1.41845	10.0862	0.385635	2.85292	3.53482	0.268198	15.4479	4.74298	57.6696	21.3148	94.0636	20.3672	198.651	34.426	54.7908	52.6984	95.1021	591.329	9367.87	1.00305	0.609399	4.36037	1	0.5	465.23	14.7432	81.6635	368.823	25.0165	1.64596	0.554125	733.045
357	8.5599	24.0143	2.57715	12.2356	3.46511	0.743037	10.7107	3.26221	40.8024	17.2591	85.1192	21.4251	239.014	47.449	35.7187	28.3977	62.5288	528.296	9519.03	0.72589	0.459886	6.84246	1	0.5	516.636	47.387	58.9834	410.266	8.65777	1.57841	0.454154	776.086
358	0.00556413	6.68428	0.0193612	0.459038	1.49947	0.297229	7.79185	2.58157	35.0698	13.6005	65.571	16.1835	171.889	32.6212	41.8376	29.3822	72.8169	418.358	11031	0.801437	0.817863	2.29496	1	0.5	354.273	7.16825	47.2399	299.865	41.8324	0.979915	0.403508	677.497
359	0	3.08697	0.0123264	0.329941	0.801475	0.119365	7.66245	2.72758	37.2887	15.9571	78.0219	19.1757	199.401	38.2032	41.0062	25.069	71.1502	468.813	9584.39	0.532729	0.588006	2.35954	1	0.5	402.788	3.42924	48.5996	350.759	102.285	0.905993	0.352339	679.771
360	0.0223049	5.41747	0.158404	3.00683	5.51573	3.17163	33.0098	11.0936	136.455	51.0087	237.971	57.3169	607.184	115.285	95.1554	103.5	141.769	1565.53	7286.87	0.902697	0.52335	8.3819	1	0.5	1266.62	8.60501	189.246	1068.77	124.203	1.72484	0.730064	796.696
361	0.043968	21.8432	0.575785	9.36631	18.74	1.38331	84.6843	26.3523	296.329	100.729	414.686	86.7798	808.766	129.25	3.80652	104.395	129.787	2774.16	7264.04	3.14858	0.663993	5.5323	1	0.5	1999.53	31.8292	427.489	1540.21	48.3898	4.7419	0.804351	755.334
362	0.706284	44.769	0.436018	4.31312	5.66528	2.28505	24.6055	8.39925	94.3905	33.5082	146.839	34.0588	338.337	57.1375	8.71381	467.052	230.057	1025.12	8567.49	1.98726	0.83208	12.0547	1	0.5	795.451	50.2245	135.346	609.881	12.1431	2.38831	2.03016	835.699
363	0.0212058	6.08447	0.0365565	1.09745	2.76012	0.343048	15.306	5.0815	61.9558	23.5295	103.235	22.851	220.384	38.3885	4.51632	73.4323	118.552	666.215	6734.79	0.794339	0.350143	4.39758	1	0.5	501.074	7.23968	85.4465	408.388	56.4097	2.26861	0.619412	733.824
364	0.0341815	24.6475	0.184976	2.62903	4.17863	1.22897	13.3478	4.24192	46.6105	17.4466	82.1786	19.9521	207.676	37.3026	6.16902	171.824	135.518	534.833	8476.59	1.9502	0.82961	22.8136	1	0.5	461.659	27.4957	69.6078	364.556	13.2587	2.35075	1.26791	911.516
365	0.00676335	109.986	0.209538	4.31209	8.37562	2.82285	44.1904	15.5625	193.123	75.3294	347.757	80.2542	802.487	136.855	8.04462	186.546	155.662	2182.24	8715.26	10.2685	2.15985	6.47859	1	0.5	1821.27	114.514	264.074	1442.68	12.5983	4.75428	1.1984	770.671
366	0.02	5.86	40.4315	185.553	37.5224	2.68529	45.9067	10.289	111.516	40.8962	189.733	45.6096	460.197	78.6467	13.5409	176.899	286.43	1235.44	11582.9	11.9582	3.37358	4.62815	1	0.5	1254.87	231.864	207.919	815.083	3.51534	3.54465	0.617601	738.534
367	0.00586766	24.7435	0.0403961	0.716069	2.23982	0.742562	12.3325	4.14486	55.0891	23.1017	120.971	32.3663	361.875	69.7276	24.1026	231.015	527.719	756.327	11512.8	4.5626	1.54809	3.63954	1	0.5	708.096	25.5058	74.5488	608.041	23.8393	2.94725	0.437761	716.76
368	0.0113205	35.4325	0.107288	2.07393	4.58386	1.05091	22.427	7.57228	100.167	37.785	171.976	39.3575	393.11	65.3824	7.42455	134.514	142.953	1073.79	9917.06	3.09607	1.50547	7.35719	1	0.5	881.037	37.6251	135.801	707.611	18.8069	2.05655	0.940965	783.361
369	0.0413796	23.0274	0.146379	2.06931	4.69757	0.582409	28.7417	9.88042	121.08	45.206	198.355	44.3122	412.062	68.7127	30.5035	516.113	581.964	1302.2	10772.8	2.17172	1.20202	5.59568	1	0.5	958.915	25.2845	164.982	768.648	30.4	1.80672	0.886846	756.425
370	0.268909	27.9144	0.133568	2.26725	3.83386	0.251842	23.0563	8.03342	103.179	39.853	187.928	43.6276	427.895	73.0117	16.6486	296.698	317.511	1168.19	9681.73	5.55197	2.07502	32.3736	1	0.5	941.255	30.5842	138.354	772.316	25.2521	2.67563	0.93445	957.689
371	0	12.7031	0.00679739	0.441218	0.477926	0.453956	5.07828	1.69032	25.9553	12.2916	75.664	21.8405	284.887	69.5536	23.2609	168.655	489.165	441.973	9984	1.57549	0.54732	1.79921	1	0.5	511.043	13.1511	33.6558	464.236	35.3002	2.87855	0.344781	658.005
372	1.73782	19.2873	0.461482	2.87017	2.71622	0.738504	14.9814	5.58759	70.0203	28.6502	127.854	31.2785	330.934	58.6665	25.0952	306.599	517.53	824.432	9751.19	1.29973	0.964528	8.28505	1	0.5	695.784	24.3568	94.0441	577.383	23.7052	1.34753	0.592427	795.494
373	0	11.7603	0.0346741	0.695319	1.92393	0.5359	12.4137	4.60246	58.5457	23.8662	113.734	28.5218	296.5	52.3179	4.50364	80.9863	80.0349	707.374	9002.19	1.19706	0.632633	2.1895	1	0.5	605.451	12.4903	78.0217	514.939	41.2272	1.89219	1.01189	673.665
374	0	21.5312	0.048617	1.35511	3.69406	0.420519	20.5042	6.85733	87.2817	32.7054	143.738	33.281	322.927	52.5881	8.58433	125.718	166.276	912.595	9635.37	3.19277	1.30274	7.22369	1	0.5	726.933	22.9349	118.758	585.24	25.5174	2.45081	0.756076	781.514
375	37.9363	86.0708	10.4289	55.8195	22.2181	3.53345	73.4014	22.0658	255.537	92.109	396.403	85.3424	801.738	133.029	7.72239	121.976	134.935	2558.76	8000.62	2.00384	0.646962	2.41098	1	0.5	2075.63	190.255	376.756	1508.62	7.92945	3.09731	0.903961	681.546
376	0.0120112	14.1202	0.034618	0.449334	1.20484	0.670754	7.63678	2.49268	31.3532	13.2259	66.905	17.3334	193.305	38.5357	3.97294	73.8701	66.3306	418.417	10294.4	0.925518	0.370559	4.69472	1	0.5	387.279	14.6161	43.3582	329.305	22.5302	2.49763	1.11367	739.859
377	98.7216	213.045	22.4005	94.2986	17.9517	1.39162	25.3984	6.82016	80.44	32.8074	160.823	41.0087	447.332	82.5577	8.75461	141.197	148.445	1010.15	10992.5	4.13202	1.36044	6.54631	1	0.5	1325	428.465	132.002	764.529	1.78434	3.03727	0.951174	771.697
378	23.4379	83.4182	5.23138	23.2221	5.60498	1.57581	16.8692	4.78505	61.1936	24.9289	119.342	31.6757	336.389	63.8322	22.3094	415.854	348.591	788.411	10468.4	3.31393	1.35314	3.56735	1	0.5	801.505	135.31	90.0286	576.167	4.25814	2.44906	1.19296	714.987
379	0.0144428	16.431	0.0415096	0.833407	2.04239	0.528278	13.9606	4.92024	62.8147	25.2358	121.773	30.6639	317.345	58.3166	5.73124	73.8344	99.962	781.772	10147.6	2.13262	1.06405	5.47809	1	0.5	654.921	17.3203	84.2662	553.334	31.9471	2.00425	0.738625	754.392
380	0.00607167	35.8724	0.0626343	1.09007	2.27057	1.26891	15.1369	5.31306	73.1941	30.9196	163.115	42.4057	479.755	91.9655	11.2373	213.563	175.176	999.103	9192.58	3.85299	1.22007	3.59714	1	0.5	942.375	37.0312	97.1835	808.161	21.8238	3.15802	1.21913	715.723
381	9.78299	82.7527	3.36302	20.1998	13.7445	5.19233	32.1224	10.4059	114.186	37.8131	170.546	41.2198	425.338	72.3672	43.1911	504.984	700.493	1154.78	11458.5	4.90779	3.55238	12.1018	1	0.5	1039.03	116.099	175.651	747.284	6.43664	1.38155	0.720899	836.133
382	0	28.2284	0.0577092	1.19297	4.51986	1.77943	22.653	8.07299	107.339	45.7611	236.49	63.1473	704.227	134.957	18.7649	166.597	332.794	1448.9	10287.5	5.30405	1.98942	1.77041	1	0.5	1358.43	29.4791	144.364	1184.58	40.1837	2.66613	0.500599	656.741
383	0.0477068	10.9089	0.247819	3.97854	7.24846	2.44671	42.9011	14.0491	165.23	61.881	265.717	56.7568	533.456	90.9097	5.74674	88.8614	91.3045	1722.95	7405.68	1.32458	0.535026	13.6766	1	0.5	1255.78	15.1829	231.876	1008.72	66.4378	2.47573	0.973242	849.922
384	0.0120287	17.2817	0.0901474	1.45234	2.97012	0.835451	13.8933	3.91042	44.4983	15.81	65.5059	14.9143	146.521	25.6413	3.8213	51.6011	61.4998	453.833	9013.64	1.04141	0.496318	11.5733	1	0.5	353.337	18.8362	66.1076	268.393	14.2488	2.09827	0.839045	831.184
385	51.6627	147.197	15.5086	75.6645	18.5038	0.369865	41.5425	11.8945	145.406	55.3593	249.489	57.1503	557.051	93.1156	19.1281	188.801	318.252	1608.41	11333.3	11.674	3.55017	3.39257	1	0.5	1519.91	290.033	217.717	1012.16	3.48983	3.2883	0.593245	710.569
386	18.1077	118.429	6.44725	32.0883	15.7253	6.09347	36.1002	10.9386	120.483	37.2397	157.96	36.7471	370.304	65.2736	17.724	226.612	244.999	1076.15	11062.5	3.67931	1.63548	9.60837	1	0.5	1031.94	175.073	189.34	667.524	3.81284	2.24968	0.92495	811.027
387	0.0403427	22.5412	0.162241	2.52266	3.86731	1.40519	15.4339	4.66782	52.8034	19.4141	87.6947	21.1779	215.356	38.2885	6.25115	114.133	85.1287	603.256	7403.49	1.00225	0.618221	3.84615	1	0.5	485.376	25.2665	78.1776	381.931	15.1161	1.62118	1.34071	721.68
388	0.0175151	34.3215	0.074079	1.3904	2.09495	0.602843	11.728	3.72643	43.4869	16.5995	78.53	19.6654	205.865	37.0668	17.3318	234.461	262.11	519.041	10462.3	2.45667	1.20781	3.98047	1	0.5	455.169	35.8035	61.6392	357.726	9.99138	2.03399	0.894513	724.764
389	1.40746	70.7436	3.32641	27.6315	28.998	13.7018	78.7252	26.8406	266.312	80.4422	304.794	64.7326	610.965	87.3409	20.9247	411.717	296.261	2244.39	9903.14	2.50326	0.556685	20.2919	1	0.5	1665.96	103.109	414.577	1148.27	11.1365	4.49672	1.38971	896.826
390	0.016973	31.8999	0.0458923	0.753106	2.47327	0.65674	13.0066	4.54525	57.134	22.5974	109.647	27.8101	295.128	53.7654	13.9658	192.594	185.866	708.501	10389.4	3.35155	1.42475	4.38814	1	0.5	619.479	32.7158	77.8158	508.948	15.5566	2.35238	1.03619	733.627
391	0.00550856	20.1503	0.0383048	0.451369	1.35443	0.546815	7.04755	2.49413	34.0787	16.1252	88.5324	25.1797	319.742	69.9139	13.9265	133.218	185.116	560.58	9643.67	1.56561	0.269524	1.34269	1	0.5	585.66	20.6455	45.5217	519.493	25.1626	5.8088	0.719648	635.598
392	0.0115686	20.8029	0.113955	2.34973	3.97341	1.38105	13.6228	3.64283	35.2783	11.6733	52.738	11.9869	123.972	22.5125	5.06979	67.6546	56.1359	361.191	9550.17	0.204315	0.0808927	8.8941	1	0.5	304.059	23.2781	57.8984	222.882	9.57475	2.52575	1.20519	802.874
393	0.00573667	4.91594	0.0665101	1.41131	4.72315	0.107552	32.7283	12.5091	161.774	61.5869	272.634	59.337	563.043	90.8628	15.5137	108.579	191.712	1752.61	11834.8	1.97917	1.14448	8.34892	1	0.5	1265.71	6.39949	211.842	1047.46	163.679	1.72931	0.566364	796.288
394	0.00616468	7.35648	0.0635063	0.93883	1.37822	0.0924048	7.77571	2.47379	29.5852	10.8788	51.3767	11.741	120.711	20.4735	9.41899	51.8368	62.7507	322.761	8440.5	1.13482	0.583676	13.0866	1	0.5	264.852	8.36498	41.3054	215.182	25.7241	1.94426	0.826076	844.912
395	0.00575974	9.26605	0.0801106	1.10144	2.58499	0.0539521	16.0275	5.23967	68.3672	24.6524	108.604	24.2778	227.959	36.5412	60.6861	204.799	395.803	670.307	11331.2	7.10414	4.07236	8.27013	1	0.5	524.761	10.4534	92.2733	422.034	40.3731	1.74448	0.517428	795.308
396	0.00605651	59.9452	0.11156	2.18123	4.9061	1.38081	25.932	9.42912	117.356	44.0675	188.992	42.6196	396.029	62.233	40.0801	139.288	155.6	1215.05	10340.7	6.88571	2.5442	8.6858	1	0.5	955.189	62.2441	159.004	733.941	11.7913	2.70643	0.895169	800.397
397	0.0118615	11.1025	0.0717764	1.99651	2.81432	0.289434	12.1699	3.33082	37.2602	12.6345	51.8941	11.072	101.996	17.1279	19.6699	60.6199	78.7481	343.519	9591.52	3.51544	1.86986	20.7454	1	0.5	263.772	13.1826	55.8646	194.725	14.7713	1.88005	0.769796	899.57
398	0	20.9865	0.0409579	0.725978	1.23848	0.295532	8.27966	3.15353	44.8323	17.5746	88.3943	22.1479	233.91	41.5323	24.9445	67.2406	81.8995	540.742	10843.4	1.47169	0.66474	9.07011	1	0.5	483.112	21.7534	57.7995	403.559	18.5515	2.21394	0.821013	804.931
399	0.043267	1.49214	0.0994929	2.35	7.12781	0.127538	51.62	21.0204	264.615	99.4946	422.869	88.6402	797.807	125.275	139.969	121.894	420.836	2817.28	11940.6	0.955253	0.578943	7.33761	1	0.5	1882.58	3.9849	344.511	1534.09	384.975	1.64999	0.289647	783.091
400	0.671999	7.38508	1.32766	11.494	12.3357	3.08173	54.18	16.7711	190.155	65.4095	260.036	53.0778	483.055	77.059	22.9284	47.3034	64.1976	1747.56	8446.73	1.6251	0.913739	10.8524	1	0.5	1236.04	20.8788	276.523	938.637	44.9565	1.77852	0.73684	824.132
401	0	28.5333	0.107525	1.78056	3.57617	1.28232	16.7825	5.08539	57.354	20.556	92.6357	21.7632	214.009	38.6451	29.5883	83.2408	78	616.382	8579.98	1.3393	0.725537	10.211	1	0.5	502.11	30.4214	84.0804	387.609	12.7413	1.84594	1.06719	817.535
402	18.5016	51.2312	5.97629	30.5164	11.4778	0.39065	36.4253	10.6121	114.833	39.7531	167.833	34.6066	320.773	52.1949	16.8271	43.9782	43.6431	1094.97	9715.02	3.00666	1.20827	12.2466	1	0.5	895.125	106.225	173.739	615.161	5.79109	2.4884	1.00768	837.459
403	0.621675	3.27529	0.398652	6.23452	14.2781	0.223825	72.7108	22.8202	256.235	90.631	369.172	75.2109	667.415	104.877	103.693	171.197	289.133	2576.68	10480	0.867158	0.553572	55.9687	1	0.5	1684.1	10.5301	366.268	1307.31	124.149	1.56648	0.592106	1037.6
404	0.065124	8.07893	0.249179	4.4705	7.28658	0.744623	30.1912	7.1505	70.339	21.8663	85.4802	17.7986	159.147	25.6695	110.071	283.051	287.149	641.689	9425.76	3.16043	1.02256	11.4832	1	0.5	438.537	12.8637	115.712	309.962	24.0958	3.09069	0.985728	830.322
405	0.00577727	10.1245	0.0368412	0.987107	2.52474	0.124576	12.9543	4.50615	56.8898	21.5561	94.7308	21.0794	200.61	32.9119	30.5938	46.3599	88.3542	591.285	11729.4	7.80702	2.82842	7.30977	1	0.5	459.042	11.1542	76.9996	370.888	33.2509	2.7602	0.524705	782.708
406	0.0618115	7.47805	0.6781	9.72723	14.3907	1.04524	50.8346	14.3137	142.583	46.5039	182.632	37.8401	340.937	52.521	8.83421	24.5812	23.2044	1259.48	9027.83	1.53526	0.595231	17.7543	1	0.5	901.545	17.9452	223.167	660.433	36.8028	2.57926	1.05933	880.511
407	0.182474	16.4046	0.492302	3.77616	4.42901	0.736745	20.3141	7.37297	94.3378	34.8778	160.02	37.0858	366.429	60.7455	169.537	116.595	514.286	1008.29	12152.8	3.98248	3.86434	6.63227	1	0.5	807.204	20.8555	127.191	659.158	31.6059	1.03057	0.226712	772.987
408	0	4.46087	0.0326734	0.750752	1.47445	0.147842	8.53932	2.94226	32.8456	12.0651	53.4816	11.6065	112.196	18.7834	7.68832	12.4532	21.8011	336.966	9530.86	2.72518	1.04062	11.2054	1	0.5	259.326	5.24429	45.9494	208.133	39.6875	2.6188	0.571219	827.631
409	0.0173792	3.78307	0.110268	1.49798	3.79983	0.337157	23.2068	8.70794	115.038	44.3811	199.771	46.7495	460.783	79.9444	139.217	110.375	392.701	1252.49	12095.1	1.73832	1.15451	7.73131	1	0.5	988.127	5.4087	151.09	831.629	153.758	1.50568	0.281067	788.394
410	6.71077	27.9402	2.15793	13.6471	11.2988	0.410452	43.8564	13.4298	142.212	50.8696	206.825	43.535	397.526	62.9429	26.6441	63.5789	66.7717	1372.55	10210.5	4.78441	1.79507	7.95224	1	0.5	1023.36	50.456	211.207	761.698	15.0963	2.6653	0.952182	791.274
411	0.133502	17.8374	0.234047	3.38962	4.56079	0.483042	20.3096	5.81538	68.003	25.2011	112.469	25.4873	243.111	41.9641	13.3028	39.1334	30.2477	723.304	8220.83	3.79574	0.89898	11.741	1	0.5	568.998	21.5946	99.1719	448.232	20.7567	4.22228	1.29376	832.773
412	0	16.7557	0.0430457	0.937191	1.9603	0.241091	12.1291	4.44749	55.3441	21.8153	97.5961	22.1968	223.313	37.4309	54.3621	108.136	140.371	607.833	11263.8	2.13868	1.33579	12.9746	1	0.5	494.21	17.7359	74.1221	402.352	22.6857	1.60106	0.77036	843.94
413	7.29135	60.2578	1.86134	10.0717	5.63936	1.28691	19.6936	5.33272	56.213	20.1299	84.9902	19.011	186.816	31.2895	48.315	95.4321	120.398	567.453	9048.67	4.12499	1.40414	13.1935	1	0.5	509.885	79.4822	88.1656	342.237	4.30583	2.93773	0.792641	845.833
414	0.0853646	12.346	0.227627	2.5861	5.57386	0.810837	24.6783	7.93459	88.9886	30.0078	126.982	27.2774	251.692	41.1669	211.649	243.489	569.316	877.888	11146.4	1.81947	1.71122	9.81305	1	0.5	620.358	15.2451	127.986	477.126	31.2969	1.06326	0.427687	813.274
415	0.0838258	1.11748	0.116632	1.68059	5.82199	0.0785937	40.1174	15.8258	200.942	75.0162	325.098	68.8062	623.307	100.805	120.34	70.7369	328.382	2154.24	11883.3	0.413059	0.4793	6.32823	1	0.5	1458.82	2.99853	262.785	1193.03	397.872	0.861795	0.21541	768.361
416	0.0347714	1.82693	0.139537	2.57223	7.44031	0.304166	30.7385	9.09371	101.083	34.4923	147.641	31.2696	286.298	44.441	87.6379	139.782	216.75	1003.58	11629.5	0.740816	0.313159	8.54783	1	0.5	697.375	4.57346	148.66	544.142	118.978	2.36563	0.644898	798.73
417	0.0674272	3.04782	0.179105	2.17977	5.00977	0.384857	28.4944	10.3055	128.293	48.0608	214.408	49.216	478.573	78.1518	115.151	59.7829	321.112	1393.79	11398.2	0.656683	0.673989	9.26402	1	0.5	1046.37	5.47412	172.488	868.409	158.639	0.974324	0.186174	807.16
418	0.0354665	1.37809	0.0507609	0.960433	2.57479	0.315675	11.9558	3.45178	32.8758	6.97598	17.3258	2.82174	20.5228	2.69341	185.427	24.1005	537.544	233.004	12848.2	0.198637	0.314303	14.8087	1	0.5	103.938	2.42475	51.1738	50.3397	20.7607	0.631992	0.0448344	859.072
419	0.011516	45.0128	0.159489	1.97927	4.06586	1.10817	17.4842	4.93316	51.2173	17.9191	73.2557	15.736	148	25.2417	20.7226	47.1087	47.7905	508.341	9349.24	3.33524	1.07669	11.6151	1	0.5	406.125	47.1631	78.8087	280.153	5.94009	3.09768	0.985734	831.581
420	0.081971	1.89459	0.175312	2.08925	5.37554	0.318639	31.1502	12.2849	152.102	53.0037	221.765	46.1239	408.86	63.8301	141.57	122.075	368.826	1557.81	12410.2	0.726403	0.651806	5.83374	1	0.5	999.055	4.24113	201.231	793.583	187.116	1.11445	0.330983	760.437
421	0.136651	6.00753	0.217309	1.89464	4.86168	0.541477	38.0641	15.6483	179.097	57.6253	235.559	48.6099	439.403	69.3758	127.131	60.9639	343.162	1677.43	11525.4	1.01193	0.642231	7.18538	1	0.5	1097.04	8.25613	238.213	850.573	103.023	1.57564	0.177654	780.979
422	0.0300587	3.94464	0.269949	3.37046	6.95705	0.451242	43.1473	15.3169	190.245	69.0872	292.207	62.4515	586.384	94.2163	74.2023	52.6312	192.12	1957.25	11633.6	0.67906	0.461161	15.6216	1	0.5	1368.08	7.61511	256.117	1104.35	145.021	1.4725	0.27395	865.304
423	0.00591202	6.26536	0.0616743	1.0701	2.05339	0.232619	9.21639	3.03678	33.5195	12.0698	53.617	11.7199	114.509	19.4346	16.8471	14.0329	42.4638	339.391	10947.3	1.02547	0.586348	21.7778	1	0.5	266.812	7.40305	48.0587	211.35	28.549	1.74892	0.330467	905.645
424	0.00579904	0.131923	0	0.0196468	0.0670723	0.119569	1.34826	0.794114	9.0624	2.58806	7.92036	1.46235	11.5562	1.55427	81.9009	0.585326	216.059	92.8704	11711.7	0.704316	0.923989	1.71986	1	0.5	36.63	0.157369	11.3914	25.0812	159.378	0.762256	0.0027091	654.48
425	0.0477046	7.29187	0.099563	1.09421	1.7942	0.380458	10.2859	3.92115	52.0809	20.6465	105.801	28.0145	315.133	58.947	124.23	58.9632	303.914	620.961	11901.5	1.58412	0.910982	24.3639	1	0.5	605.538	8.53334	68.4626	528.542	61.9385	1.73891	0.194013	919.923
426	63.5582	168.526	21.4091	104.487	23.2894	0.912314	38.8524	9.72871	114.138	42.1709	184.745	40.4558	389.466	66.526	135.118	192.082	295.633	1161.21	9563.06	2.7528	0.938002	43.498	1	0.5	1268.26	357.98	186.921	723.364	2.02068	2.93475	0.649732	999.553
427	0.0731647	76.4963	0.389783	7.69558	14.7525	2.54677	67.917	21.5032	246.121	88.2451	382.903	84.1556	784.559	122.297	232.002	485.95	479.765	2538.33	9573.57	6.22467	2.00936	15.0812	1	0.5	1899.65	84.6548	352.84	1462.16	17.272	3.09785	1.01289	861.19
428	94.1111	243.68	30.8567	141.343	27.0778	1.51738	30.2506	5.95797	58.953	19.7038	90.7395	21.8192	231.091	42.6843	108.88	108.641	234.596	589.362	10939.5	2.05329	1.08701	5.86977	1	0.5	1039.79	509.991	123.757	406.038	0.796166	1.88893	0.463099	761.032
429	0.0183237	20.728	0.0875205	2.11055	3.79122	0.755137	16.477	4.73493	51.5731	17.838	77.0258	17.4387	166.42	28.4213	19.1234	25.7653	38.0398	542.817	8917.02	1.77669	0.588776	8.44846	1	0.5	407.419	22.9444	77.3314	307.144	13.3865	3.01759	0.677325	797.516
430	0.0974635	14.1956	0.14125	1.124	2.13918	0.549563	8.53012	2.77441	34.9561	12.9926	56.3505	12.9536	125.129	22.0207	108.899	81.9882	222.523	379.025	11650.7	1.03744	0.828482	14.5993	1	0.5	293.954	15.5583	48.9493	229.447	14.7476	1.25222	0.368449	857.422
431	2.13902	24.6962	0.719022	4.02836	3.55354	1.01343	17.6179	6.08832	80.8045	34.3595	171.298	43.5169	474.857	92.7869	212.217	273.081	403.241	1065.36	9399.41	3.16063	1.37426	59.8459	1	0.5	957.478	31.5826	109.078	816.818	25.8629	2.29987	0.677215	1048.1
432	0.159673	32.4215	0.473763	5.58882	6.38106	1.82019	22.8017	6.38178	68.3133	24.7072	110.13	26.4489	269.033	49.4665	127.134	182.744	233.236	742.55	9728.86	1.56595	0.566556	9.54233	1	0.5	624.128	38.6437	105.698	479.786	12.4156	2.76399	0.783514	810.294
433	10.4467	33.8411	1.96076	7.65322	4.39091	0.508842	18.4181	5.77173	66.8951	25.4187	114.722	25.237	253.382	44.0128	88.0015	127.822	157.551	739.931	8852.3	1.9001	0.493862	4.56741	1	0.5	612.659	53.9017	95.9847	462.773	8.58549	3.84743	0.811305	737.313
434	0	11.6066	0.0560959	1.18659	1.8432	0.240166	8.40355	2.99914	34.579	13.136	59.509	13.428	134.078	23.1803	34.7635	21.4236	69.8473	383.372	10529.9	1.81092	0.89274	17.4493	1	0.5	304.246	12.8492	48.065	243.331	18.9374	2.02849	0.306721	878.429
435	0.0117835	8.43454	0.0375834	0.946921	1.99968	0.193496	13.4099	4.7833	55.6793	20.3262	88.4429	19.0275	178.007	29.1957	47.5949	45.7416	91.5333	579.713	9869.04	2.54781	1.01719	7.07339	1	0.5	420.496	9.43083	76.0657	334.999	35.5217	2.50474	0.499726	779.402
436	0	23.9708	0.049541	0.836384	1.95034	0.39899	11.6776	3.68531	45.8753	17.074	76.9962	17.889	172.847	31.1426	5.48592	9.69061	9.12018	524.704	10311.9	1.63515	0.295828	5.73093	1	0.5	404.394	24.8567	63.5875	315.949	12.7108	5.52739	1.06255	758.721
437	1.62912	88.2096	2.93084	18.4319	15.2939	5.51865	35.5673	10.9305	116.296	36.8958	152.143	34.683	340.082	57.6424	327.517	386.973	572.068	1106.05	10327.5	1.89954	1.01271	24.3004	1	0.5	916.254	111.201	183.607	621.445	5.58847	1.87569	0.676446	919.587
438	0.0120608	17.3592	0.0242128	0.592746	1.25557	0.197845	8.36773	2.82914	36.8372	14.2355	64.0468	14.5814	138.247	22.6619	40.9612	46.4908	73.0943	415.018	11478.8	1.75278	0.664982	4.15552	1	0.5	321.248	17.9882	49.4875	253.773	14.1077	2.63583	0.636038	728.656
439	0.00611279	15.9284	0.0843838	1.45307	3.77235	0.458721	16.6286	5.00136	51.0221	17.5966	71.1117	15.4128	142.649	24.273	94.9639	92.5347	170.224	508.95	10469.6	1.11939	0.703991	11.8997	1	0.5	365.398	17.4719	76.8831	271.043	15.5131	1.59006	0.543607	834.261
440	2.10857	18.0342	1.62944	16.1924	17.673	0.816271	67.2929	18.1606	193.179	64.704	257.957	52.4958	470.99	74.0551	128.289	210.953	206.391	1741.18	6845.35	1.99566	0.689955	4.4337	1	0.5	1255.29	37.9646	297.122	920.202	24.2384	2.89244	1.0221	734.575
441	23.0491	87.6907	8.98074	40.366	10.1356	0.501093	14.5607	3.92119	44.4032	16.5668	81.3459	19.8965	206.47	36.9939	68.4468	145.734	101.162	515.71	12774.7	2.67675	1.48416	11.7951	1	0.5	594.882	160.087	73.5217	361.273	2.25674	1.80355	1.4406	833.282
442	0.0279202	33.2618	0.10897	2.80236	3.96189	1.13079	14.5628	3.69624	36.4306	11.6982	46.9428	10.548	104.773	18.5513	110.752	175.906	170.657	358.98	8826.28	1.07833	0.655038	5.93062	1	0.5	288.496	36.201	59.7823	192.513	5.31788	1.64621	1.03076	762.031
443	0.106861	16.4017	0.251034	1.80625	2.08491	1.05432	6.14698	2.07524	24.1155	8.39723	38.4741	9.29757	105.991	21.7267	153.511	117.129	277.167	265.064	11752.5	0.804162	0.612181	3.18003	1	0.5	237.929	18.5658	35.4769	183.886	9.90456	1.3136	0.422593	704.937
444	0.022424	12.043	0.295797	5.53855	9.51436	2.38734	51.1154	15.9417	174.719	61.6004	255.1	53.8784	511.126	85.3296	68.0014	91.1029	112.602	1751.88	9783.27	1.77499	0.890477	3.97399	1	0.5	1238.61	17.8998	253.678	967.035	54.0248	1.9933	0.80907	724.617
445	0.0170318	15.1919	0.0888483	1.20241	2.48127	0.79272	13.54	4.47378	52.3918	18.8093	88.7212	20.8315	222.373	40.6657	94.8128	121.533	154.181	586.108	10631.2	1.42268	1.32752	2.82246	1	0.5	481.58	16.5002	73.6796	391.401	23.7209	1.07168	0.788245	694.72
446	0	47.5183	0.1282	3.58703	5.10093	1.14474	22.1634	6.37942	67.4578	22.0677	94.2295	20.6149	199.279	33.5515	42.6918	75.7557	65.5326	659.6	9366.63	2.72286	1.04885	11.8633	1	0.5	523.222	51.2335	102.246	369.742	7.21681	2.59604	1.156	833.921
447	0.0121112	37.8666	0.267057	3.60873	6.51305	1.4299	23.0967	7.3234	74.7087	25.4601	104.608	23.7217	225.454	35.7175	23.7797	37.9672	37.4677	714.018	8724.11	1.90812	0.648783	18.8421	1	0.5	569.788	41.7545	113.072	414.962	9.93812	2.94108	1.01333	887.717
448	0	0.020116	0	0	0.0477228	0.0290206	0.0995031	0.0824022	1.90515	1.27295	10.4758	4.04123	52.7969	11.1591	0.977573	0.0787114	1.88249	50.38	12253.1	0.550826	0.322679	2.92932	1	0.5	81.9298	0.020116	2.1638	79.7459	3964.31	1.70704	0.0418124	697.88
449	7.29359	50.2209	1.90726	11.4988	6.238	1.26951	20.2425	6.01726	62.5572	21.8858	93.8194	20.3288	201.153	33.1777	31.4464	66.3547	46.1563	641.091	8774.48	1.89068	0.70804	16.0107	1	0.5	537.61	70.9205	96.3245	370.365	5.22225	2.6703	1.43761	868.196
450	0.0526803	10.6713	0.0840433	1.11198	2.14437	0.450062	15.0136	5.79837	74.5378	28.6252	135.369	32.7153	329.836	58.1783	111.674	76.6098	192.48	891.793	10550.6	3.23008	2.10745	33.5351	1	0.5	694.588	11.92	97.9442	584.724	49.0539	1.5327	0.398014	962.54
451	0.0184586	27.6159	0.207834	3.0332	4.80407	1.4077	16.0583	4.33912	48.1791	14.8942	60.647	13.2479	128.928	20.9398	14.1017	29.6701	20.4135	444.354	8361.47	1.51033	0.57942	14.3538	1	0.5	344.321	30.8754	74.7883	238.657	7.72968	2.60662	1.45345	855.464
452	0	6.66889	0.0682098	1.12895	2.7995	0.507589	17.2939	6.7516	85.0621	31.7195	146.163	33.1045	323.396	53.6581	51.9042	55.7704	83.263	932.681	9812.63	1.40841	0.882339	5.28323	1	0.5	708.322	7.86605	112.415	588.042	74.7569	1.59623	0.66981	750.944
453	37.8481	87.2935	8.00486	27.1829	3.51361	0.376155	8.04995	2.45391	27.4802	10.5259	48.7217	12.5369	136.84	25.6614	45.363	85.5477	65.1602	335.596	11274.5	0.728525	0.631178	2.35168	1	0.5	436.489	160.329	41.8739	234.286	1.46128	1.15423	1.31288	679.497
454	0.0276528	14.5443	0.124479	2.08947	3.58435	1.02808	20.7376	6.90858	84.928	31.5994	138.604	30.8833	302.596	51.7191	241.224	200.008	388.774	929.258	9656.66	1.03517	0.861386	15.3253	1	0.5	689.374	16.7859	117.187	555.402	33.0874	1.20175	0.514457	863.063
455	0.00824485	0.9995	0.030041	0.929601	3.06719	0.128745	11.505	2.29663	14.8758	2.35843	5.55744	0.590002	4.81384	0.588943	101.749	31.7389	281.241	82.5338	13047.3	0.407719	0.195285	51.0391	1	1	47.7494	1.96739	31.8733	13.9087	7.06961	2.08781	0.112853	925.922
456	0.00631746	1.11765	0.0375753	1.23745	3.47886	0.137924	11.2119	1.88438	11.3347	1.65799	4.29748	0.496953	3.74201	0.454293	127.918	29.3925	396.149	58.5483	12911.4	0.2399	0.0815625	52.8654	1	1	41.0954	2.39899	28.0477	10.6487	4.43884	2.9413	0.0741957	930.513
457	0.0946273	0.799985	0.0370905	0.545913	1.55821	0.118448	9.13251	2.75206	27.2184	7.84925	37.3222	9.1233	118.25	21.8322	181.417	31.1614	607.943	271.195	13534.1	0.518782	0.734527	36.6692	1	1	236.634	1.47762	40.7796	194.376	131.547	0.706281	0.0512571	884.397
458	0.00633297	0.702568	0.0569825	0.922969	2.65898	0.163874	11.1628	2.08926	13.0192	1.86908	5.1701	0.649967	5.56078	0.813713	85.4177	16.6784	267.971	65.3116	13336.5	0.423718	0.406182	57.3781	1	1	44.8466	1.68885	29.0941	14.0636	8.32734	1.04317	0.0622397	941.347
459	0.341317	12.8249	0.133361	1.19797	2.73797	0.532671	11.0914	2.86302	36.4728	13.371	72.172	17.5416	222.97	41.4095	356.234	191.386	571.484	461.034	12689.4	1.50313	1.07846	53.3076	1	1	435.66	14.4975	53.6979	367.464	25.3467	1.39377	0.334894	931.605
460	0.0304495	2.60509	0.146066	3.23884	4.25321	0.0694988	8.42956	1.0844	5.68914	0.704832	1.43681	0.18553	1.33286	0.258103	387.633	157.703	519.735	23.3323	12406.7	0.165795	0.0226598	55.1283	1	1	29.4644	6.02045	19.5258	3.91813	0.650804	7.31671	0.30343	936.032
461	0.0300351	1.03989	0.060861	0.713159	1.28254	0.156665	6.83627	2.15307	25.8854	9.55264	54.1313	14.4151	192.916	37.1459	258.179	32.2819	783.902	329.438	13059.8	1.3513	1.60494	50.254	1	1	346.319	1.84394	36.314	308.161	167.121	0.84196	0.0411811	923.908
462	0.0213992	1.70486	0.119752	1.95836	4.48157	0.14987	11.3774	1.71284	8.83154	1.52582	3.89469	0.572977	5.13774	0.847102	133.387	84.1744	199.37	49.7846	11844.4	0.270071	0.0213395	53.5588	1	1	42.3359	3.80437	26.5532	11.9783	3.14857	12.6559	0.422202	932.223
463	0.017324	0.654567	0.0298789	0.456108	1.16798	0.144857	8.3588	2.4303	28.1573	9.00679	48.687	12.0123	148.889	27.634	143.096	21.8254	480.318	321.75	13161	0.710019	0.704429	51.2402	1	1	287.646	1.15788	40.2592	246.229	212.655	1.00793	0.0454395	926.433
464	0.02	5.86	82.4995	0.62	42.6873	0.45742	28.7092	7.47826	105.626	38.5651	196.438	42.2914	485.185	84.0941	796.135	823.523	754.615	1270.37	11267.3	2.41491	1.41032	67.8841	1	1	1120.53	88.9995	184.958	846.574	9.51212	1.71231	1.09132	964.208
465	0.00626025	0.555422	0.0383853	0.721961	3.1551	0.145883	13.6942	2.52601	15.984	3.01702	8.11646	1.13547	9.48456	1.30265	106.345	27.9514	299.785	101.347	12328.3	0.447823	0.344109	49.8085	1	1	59.8834	1.32203	35.5052	23.0562	17.44	1.3014	0.0932384	922.755
466	0.0170287	2.2517	0.172924	2.99406	4.78194	0.0905629	10.1492	1.31215	6.78614	0.906693	2.00384	0.213452	1.74106	0.306856	210.342	132.461	285.583	31.2155	11752.6	0.229778	0.0468683	67.0484	1	1	33.7276	5.43572	23.12	5.17191	0.951467	4.90264	0.463826	962.495
467	0.048587	1.53385	0.0803822	1.27318	2.88694	0.249697	8.41786	1.67928	14.2267	4.05117	21.7251	5.15995	70.8412	13.2917	117.3	48.8423	350.594	140.008	11946.8	0.442222	0.550241	41.4993	1	1	145.465	2.936	27.4604	115.069	39.1924	0.803689	0.139313	899.596
468	0.000405606	0.751168	0.0326323	0.841757	3.25942	0.187845	14.0399	3.02257	20.7194	3.77529	10.3661	1.33102	9.49971	1.30468	97.781	26.2364	273.725	135.94	12871.6	0.41299	0.152251	56.5976	1	1	69.132	1.62596	41.2292	26.2768	16.1608	2.71255	0.0958495	939.522
469	0.02	0.964789	0.0480005	0.801093	2.46009	0.111893	5.92035	0.642154	3.07399	0.413811	0.84074	0.0886985	0.673201	0.112824	92.8341	39.5118	200.204	14.4459	11730.5	0.178221	0.0329483	47.8299	1	1	16.1716	1.83388	12.2085	2.12927	1.16107	5.4091	0.197358	917.533
470	0.286398	56.923	0.927173	11.6126	15.9019	6.33244	55.32	16.0335	181.689	56.0354	244.345	48.3481	516.489	84.3891	47.2154	334.981	353.043	1903.85	8797.84	8.59699	1.49563	11.056	1	1	1294.63	69.7491	275.277	949.607	13.6146	5.74809	0.948837	755.259
471	0.00462696	0.716971	0.031588	0.720883	2.53295	0.138327	13.0629	2.72706	17.4436	2.88001	7.35532	0.973807	7.82142	1.01794	108.965	18.0924	346.834	103.171	12559.3	0.536386	0.429426	47.1488	1	1	57.4274	1.47407	35.9048	20.0485	13.6008	1.24908	0.0521643	915.696
472	0.00858029	1.08718	0.0591482	1.16137	3.08026	0.156176	9.91962	1.60327	9.14058	1.43516	4.60691	0.83979	9.45614	1.75719	105.957	43.3727	234.086	55.2047	11963.6	0.328237	0.189075	41.4202	1	1	44.3114	2.31628	23.8999	18.0952	7.81219	1.73601	0.185286	899.358
473	0.0472579	2.27439	0.105588	2.12283	3.52496	0.0934802	7.80542	1.23338	6.95543	1.04392	2.20805	0.274037	2.1067	0.232435	274.495	153.492	466.656	34.8591	13368.7	0.22815	0.0564643	55.2111	1	1	30.0279	4.55006	19.6127	5.86514	1.28902	4.0406	0.32892	936.231
474	0.00630899	0.703617	0.030601	0.727087	2.95248	0.172189	15.0698	2.73339	15.7639	2.14825	4.737	0.571306	4.37426	0.617206	117.417	30.056	316.444	79.4023	12696.1	0.747728	0.638212	53.223	1	1	50.6074	1.46761	36.6918	12.448	8.48181	1.1716	0.0949803	931.397
475	0.0607982	54.0353	0.134691	2.32598	5.05621	1.78939	26.4886	8.98429	123.283	45.1902	226.644	49.1313	559.272	97.2897	42.2958	280.935	415.704	1572.88	10953.2	12.3402	2.47098	6.13804	1	1	1199.69	56.5568	165.602	977.527	17.284	4.99404	0.675804	701.871
476	0.00630775	0.503887	0.0193208	0.372997	1.78621	0.162532	13.2703	3.11569	21.9444	3.97529	10.9696	1.63936	15.564	2.61586	105.495	15.6155	334.066	133.845	12828.6	0.593359	0.545485	52.0833	1	1	75.9458	0.902513	40.2791	34.7642	38.5193	1.08776	0.0467437	928.562
477	0.0228198	0.366313	0.0254158	0.349129	1.78405	0.0790106	9.16273	2.18528	12.6004	2.07498	5.181	0.737096	6.69311	1.02271	113.806	16.1036	410.877	73.0683	12840.2	0.388956	0.288576	42.2886	1	1	42.284	0.763678	25.8115	15.7089	20.5701	1.34785	0.0391934	901.945
478	0.0267231	17.4706	0.0340972	0.672095	2.95752	0.858567	17.2442	6.57051	95.8165	36.1817	182.671	39.7682	453.064	78.4598	43.5263	242.144	619.829	1239.22	12736.6	16.7179	3.63802	5.12184	1	1	931.796	18.2035	123.447	790.145	43.4062	4.59532	0.390662	686.548
479	0.0215752	3.13113	0.204801	4.34647	5.06285	0.0686108	10.0748	1.39661	8.03644	1.2073	2.61619	0.311371	2.39102	0.347304	230.361	123.553	414.911	40.0562	11990.5	0.174896	0.036269	53.3578	1	1	39.2165	7.70398	24.6393	6.87318	0.892159	4.8222	0.297781	931.729
480	0.00843279	2.73496	0.188811	3.57583	5.03543	0.0670301	10.1123	1.3938	7.04961	1.0129	2.67205	0.287975	2.59711	0.549404	220.67	112.578	432.678	33.3371	12120.4	0.143747	0.0238036	52.3269	1	1	37.2857	6.50803	23.6582	7.11944	1.09395	6.03885	0.260188	929.172
481	0.0405353	1.62681	0.0816492	1.79464	3.95903	0.190968	10.3226	1.71187	14.3035	3.95044	21.4013	5.33511	66.2648	12.0386	196.255	68.1867	471.333	148.974	12098.7	0.501937	0.528399	49.5079	1	1	143.022	3.54363	30.488	108.99	30.7566	0.949922	0.144668	921.972
482	0.0101384	0.344729	0.0124148	0.442506	1.29311	0.138074	11.1216	3.02647	25.1013	5.94754	21.9813	3.77036	40.8502	7.62649	165.735	20.966	553.748	203.299	13086.7	0.582768	0.764637	61.7412	1	1	121.666	0.809788	40.6806	80.1758	99.0084	0.76215	0.037862	951.207
483	0.0423479	6.0806	0.512612	7.3065	14.6408	0.423363	38.8805	7.18887	51.9055	11.5665	43.421	9.17123	105.2	18.3409	703.841	555.834	1323.69	351.637	36925.9	2.18685	0.853845	69.1051	1	1	314.68	13.9421	113.039	187.699	13.4628	2.56118	0.419913	966.683
484	0.0413067	1.75281	0.0989768	2.13529	8.2273	0.557593	52.1436	12.1711	82.1692	15.0151	35.5721	5.38654	40.9653	6.47204	276.092	45.8455	962.446	472.124	40323.5	1.89543	1.51539	62.0224	1	1	262.708	4.02838	155.269	103.411	25.6707	1.25079	0.0476344	951.824
485	0.0210231	3.0418	0.164408	2.90897	8.26542	0.325893	23.2603	3.37885	20.8981	3.85534	8.19861	1.24782	9.30927	1.05755	225.097	91.6658	620.856	123.668	37286	0.726632	0.368922	70.3316	1	1	85.9333	6.1362	56.1285	23.6686	3.85721	1.96961	0.147644	969.134
486	0.114767	5.39169	0.306421	6.89892	10.4911	0.283445	27.5378	4.84019	26.1718	5.27376	16.9707	3.64325	41.3753	7.84237	636.97	527.833	1157.09	167.589	37861.8	0.832347	0.438562	66.9653	1	1	157.142	12.7118	69.3243	75.1054	5.90833	1.8979	0.456174	962.323
487	1.9411	28.0451	1.39707	18.3676	22.2911	1.72319	81.6912	25.4001	320.038	117.657	561.82	138.718	1570.46	288.381	684.586	357.008	1736.89	3435.1	34134.5	4.09568	3.81449	71.8575	1	1	3177.93	49.7509	451.144	2677.04	53.8088	1.07372	0.205545	972.139
488	0.0540231	7.85627	0.24552	4.59213	10.7847	0.334072	33.8088	7.28457	71.9762	22.8144	97.7019	22.5137	242.517	43.7866	446.664	205.227	936.145	680.555	37643.6	2.25774	1.8114	77.0808	1	1	566.27	12.7479	124.188	429.334	33.6787	1.24641	0.219226	982.062
489	0.0551276	1.17207	0.057425	0.943585	3.1493	0.393279	30.7999	11.0864	93.6584	20.8767	71.9947	13.6415	140.694	23.2251	416.415	33.4529	1517.49	763.513	39654.9	1.6765	1.75911	60.5485	1	1	411.748	2.22821	139.087	270.432	121.367	0.953036	0.0220449	948.567
490	0.0347448	6.15831	0.447552	8.11761	14.3623	0.187895	28.1966	3.42163	14.5877	1.93478	4.0552	0.668803	4.88865	0.734441	770.869	690.987	1261.07	66.955	35552	0.649088	0.104645	78.2107	1	1	87.7962	14.7582	60.7561	12.2819	0.832206	6.20277	0.547938	984.14
491	0.020216	3.88213	0.142107	3.6609	8.95721	0.534853	26.8455	6.61295	46.8759	9.89458	26.8322	3.95237	27.7686	3.43745	201.47	90.0978	526.778	338.992	38389.6	1.01812	0.299871	61.2028	1	1	169.417	7.70535	89.8264	71.8852	9.32925	3.39521	0.171036	950.02
492	0.03375	4.41451	0.203976	4.31055	13.1405	0.547755	33.7374	6.42637	47.5316	9.36068	27.8552	3.95005	30.1851	4.12273	258.935	153.493	624.221	314.196	37042.8	0.677385	0.14328	77.1604	1	1	185.82	8.96279	101.384	75.4738	8.42079	4.72771	0.245896	982.21
493	0.077555	11.2944	0.254863	5.43111	10.3712	0.360692	35.6075	8.87866	92.5738	33.127	153.581	37.065	414.292	73.3994	860.682	526.592	1755.3	1032.73	38016	2.68488	2.7674	67.6698	1	1	876.314	17.058	147.792	711.464	41.7086	0.970183	0.300001	963.771
494	0.0327797	3.7775	0.338137	6.94665	15.853	0.394383	46.817	8.89971	70.8658	16.03	49.412	8.19175	65.3632	9.28808	919.554	530.785	2250.78	522.808	42045.2	0.930643	0.395302	87.994	1	1	302.21	11.0951	142.83	148.285	13.365	2.35426	0.235822	1001.23
495	0.026883	2.20476	0.107068	2.42533	8.3401	0.394265	33.7313	6.64351	44.5331	8.0455	21.2717	3.30487	28.2582	4.35297	292.745	72.2507	947.88	264.828	39753.1	1.66785	1.68111	77.3862	1	1	163.64	4.76404	93.6422	65.2333	13.6928	0.992113	0.0762235	982.626
496	0.00667018	4.57108	0.0961587	2.04166	6.94018	0.241365	35.4293	7.56541	48.7162	10.2327	35.1685	6.75001	74.6759	12.9932	271.956	75.0482	768.934	333.281	40499.1	2.49483	1.73299	65.4947	1	1	245.428	6.71556	98.8924	139.82	20.8203	1.43962	0.0976003	959.264
497	0.01995	1.6566	0.0908374	1.12418	4.77758	0.480325	29.2507	8.97178	88.4339	27.1351	122.932	30.6253	339.724	63.1913	333.889	56.0941	1144.93	850.913	39529.2	2.08838	1.83671	68.7378	1	1	718.413	2.89157	131.914	583.608	201.831	1.13702	0.0489933	965.942
498	0.0802802	4.69323	0.365724	7.03789	14.4658	0.252736	38.7118	7.61586	49.1212	8.30014	19.2244	2.42269	16.1758	1.71178	401.565	141.688	949.737	283.071	36876.4	0.413046	0.0850959	59.9868	1	1	170.179	12.1771	110.167	47.8348	3.92825	4.85389	0.149186	947.31
499	0.205478	6.78662	0.220608	2.7528	6.55512	0.80027	30.8091	10.3738	132.561	49.7246	254.357	68.767	813.805	154.076	469.929	109.442	1445.66	605.98	38669.9	2.20174	2.40538	69.4492	1	1	1531.79	9.96551	181.099	1340.73	134.537	0.915342	0.0757038	967.374
500	0.0201459	7.50736	0.392734	8.62586	11.7531	0.211473	24.068	3.94512	18.8356	2.84461	5.61369	0.728465	5.01981	0.72572	793.713	851.508	885.901	80.7958	38341.6	0.82238	0.170473	92.6173	1	1	90.2916	16.5461	58.8132	14.9323	0.902466	4.82411	0.961177	1008.8
501	0.020467	1.83457	0.0829221	1.93374	6.06149	0.596123	36.0323	8.90724	62.2112	11.8562	28.7721	3.81806	28.6838	3.82301	247.736	36.6845	900.088	376.992	40038.2	2.42077	2.13016	71.0749	1	1	194.633	3.8717	113.808	76.9532	19.8758	1.13643	0.0407566	970.604
502	0.0270606	6.83203	0.436907	7.70186	13.204	0.29562	30.7444	6.93453	63.7549	16.4139	55.2398	9.22413	84.3073	11.0581	262.798	88.0552	817.173	514.781	39966.8	0.531623	0.0928629	74.0109	1	1	306.175	14.9979	114.933	176.243	11.7512	5.72482	0.107756	976.296
503	0.0276143	4.43403	0.218554	4.29398	9.71895	0.582868	31.1238	6.92677	67.5666	18.725	73.4123	14.3212	136.529	21.4627	436.043	134.477	1450.81	629.09	44088.7	0.853979	0.516717	39.0985	1	1	389.344	8.97418	115.919	264.451	29.468	1.6527	0.0926913	892.227
504	0.0335495	5.04809	0.326502	5.86194	15.2734	0.72852	37.9723	5.80544	26.516	3.5526	7.15637	0.923736	6.4473	0.854799	276.917	166.563	683.825	115.093	37505.9	0.566353	0.0733062	64.5587	1	1	116.5	11.2701	86.2956	18.9348	1.68009	7.72585	0.243576	957.289
505	0.0474868	2.46257	0.128967	2.66874	8.29064	0.69399	47.7406	11.2015	94.5165	25.9185	115.567	28.2612	326.342	57.6013	448.741	93.0731	1522.55	835.972	40525.2	3.91459	4.46902	57.9429	1	1	721.441	5.30777	162.443	553.69	104.317	0.875941	0.0611299	942.656
506	0.0495204	19.831	0.252884	4.66043	10.1523	0.661665	32.951	5.98029	42.9451	12.1771	50.5827	11.9799	134.921	25.7499	417.124	237.628	704.766	394.432	37186.6	1.81637	0.631833	77.4015	1	1	352.895	24.7939	92.6904	235.411	9.49472	2.87477	0.337173	982.655
507	0.0813793	6.2316	0.541669	8.53274	15.7685	0.368183	36.8757	5.35552	34.5339	7.42699	27.3142	6.01149	69.3884	13.2263	583.167	161.676	1689.68	223.017	39958.1	1.44321	0.726948	71.7292	1	1	231.657	15.3874	92.9019	123.367	8.01744	1.9853	0.0956844	971.888
508	0.0945243	4.80568	0.357377	5.48133	11.6971	0.501677	42.0802	7.18465	41.8248	8.25371	25.334	4.98443	53.2733	10.0181	236.612	151.162	593.268	246.003	38277.4	2.40328	1.5706	53.8741	1	1	215.891	10.7389	103.288	101.864	9.48547	1.53017	0.254795	932.995
509	0.0331195	3.49548	0.0958026	1.87975	5.16116	0.449169	24.1284	9.42487	136.509	57.2195	314.476	85.1144	1047.21	201.118	680.101	138.102	2149.38	828.068	39397.7	4.53848	4.99693	51.7308	1	1	1886.31	5.50415	175.672	1705.13	309.791	0.908255	0.064252	927.675
510	1.35329	4.94457	0.276559	3.84425	9.06238	0.494826	34.0819	7.35936	54.7192	14.0998	60.0145	13.9333	156.576	27.9784	399.678	100.449	1188.07	464.276	38646	1.31081	1.66052	51.7312	1	1	388.738	10.4187	105.718	272.602	26.1647	0.789398	0.0845481	927.676
511	0.00711768	4.10439	0.260159	5.80016	17.6638	0.849397	42.7505	6.34821	33.7905	5.51521	12.6829	1.8051	12.2008	1.68948	258.075	103.803	726.991	182.08	37870.8	0.527332	0.0832273	55.8042	1	1	145.468	10.1718	101.402	33.8934	3.33209	6.33605	0.142784	937.646
512	0.00710445	3.62064	0.243487	3.3829	9.98478	0.354221	30.7352	5.2179	25.2033	4.11736	8.4413	1.07067	7.32078	0.97241	326.068	110.748	919.041	128.322	39172.7	0.485295	0.102636	61.3315	1	1	100.672	7.25413	71.4954	21.9225	3.02207	4.7283	0.120504	950.305
513	4.21767	12.5111	1.33422	6.64589	6.76004	0.484039	36.4688	10.3221	84.671	18.4583	61.3589	14.0922	161.091	29.2425	496.165	73.3676	1824.85	652.307	42373.3	1.52285	2.25071	57.2282	1	1	447.658	24.7089	138.706	284.243	11.5037	0.676609	0.0402048	940.998
514	3.64855	9.95069	0.744481	4.44034	6.28421	0.593041	36.283	10.6287	87.988	23.2643	95.5833	22.0023	239.675	43.2725	478.948	111.727	1663.44	735.214	39907.6	2.41741	2.75608	59.6	1	1	584.359	18.7841	141.777	423.798	22.5616	0.877118	0.0671658	946.439
515	0.0140349	2.37032	0.165823	2.95739	11.1756	0.711051	38.7119	5.74759	28.135	4.02295	8.09294	1.00125	6.03087	0.786062	230.852	74.3548	711.341	127.919	36810.4	0.674789	0.144949	53.2532	1	1	109.923	5.50756	84.4811	19.9341	3.6194	4.65537	0.104528	931.472
516	0.0140114	3.34203	0.19762	5.49198	14.8787	0.900743	44.9004	6.42759	35.313	6.83272	21.7203	4.10936	33.6433	3.9045	287.925	97.9977	936.029	239.757	36573.6	0.917272	0.192974	33.9444	1	1	181.676	9.04564	102.42	70.2101	7.76177	4.75336	0.104695	875.112
517	0.144074	3.91854	0.29296	5.06083	11.8044	0.384046	29.0262	5.30749	33.2925	7.23688	21.1437	3.72276	31.2178	4.72472	316.704	134.19	848.625	215.068	40631.7	0.596286	0.174211	78.5504	1	1	157.277	9.4164	79.8147	68.0458	7.22631	3.42279	0.158126	984.761
518	0.00606476	3.39641	0.142301	3.06317	7.24468	0.394587	23.4396	5.16472	43.583	12.7307	57.866	14.0281	159.933	30.241	281.097	74.3043	862.18	426.614	37970.6	0.890348	0.635583	69.9039	1	1	361.233	6.60795	79.8266	274.799	41.5861	1.40084	0.0861819	968.283
519	0.00494981	3.83987	0.428735	7.26624	14.7525	0.405105	37.4126	7.01227	45.4275	7.25818	18.5908	2.54228	18.8894	2.36349	403.393	147.995	1171.71	232.963	42710.8	0.542892	0.206255	72.8752	1	1	166.194	11.5398	105.01	49.6442	4.302	2.63214	0.126306	974.115
520	0.331373	1.72417	0.144512	1.42602	4.60118	0.460858	31.4496	9.60008	75.1039	16.7778	68.6744	17.2207	210.994	41.4759	464.619	49.7324	1755.89	565.895	40549.2	1.55275	1.41673	53.1355	1	1	479.985	3.62608	121.216	355.143	97.9414	1.09601	0.0283232	931.181
521	0.0395067	3.63141	0.135702	3.01863	9.52163	0.658236	29.9497	4.75603	25.0374	3.64016	7.74782	0.995615	7.42824	0.889079	410.603	118.464	1353.81	121.292	41899.9	0.771285	0.290534	31.5766	1	1	97.4492	6.82526	69.923	20.7009	3.03299	2.65472	0.0875042	866.55
522	0.0409391	4.46963	0.270873	5.47469	13.4607	0.773899	34.4937	5.89983	29.3398	4.60465	10.4772	1.37937	8.80172	1.28226	239.953	102.585	698.884	150.608	37475.8	0.474864	0.0658695	81.441	1	1	120.769	10.2561	83.9679	26.5452	2.58823	7.20917	0.146784	989.956
523	0.02	2.63606	0.129322	3.58514	10.8858	0.5461	32.0644	4.6867	22.0737	2.97917	5.66496	0.758915	4.34245	0.617157	223.175	73.6884	668.565	98.1054	37255.1	0.56718	0.10317	66.2784	1	1	90.9899	6.37051	70.2567	14.3627	2.25455	5.49753	0.110219	960.901
524	2.16797	10.0567	0.437496	2.65795	5.7683	0.475461	35.0767	8.40844	64.456	17.5308	77.9259	19.8349	256.925	49.1964	426.944	102.574	1534.67	568.112	39781.4	2.94326	3.26005	54.3883	1	1	550.917	15.3201	114.185	421.413	27.5072	0.902827	0.0668376	934.247
525	0.0133401	4.23193	0.234442	4.2836	11.6089	0.556304	36.3051	5.83805	31.1744	5.68241	17.8304	3.78565	46.8876	8.3972	288.133	98.1023	741.983	180.43	37736.5	1.24645	0.46953	64.2552	1	1	176.829	8.76331	85.4827	82.5833	9.42376	2.65468	0.132216	956.644
526	0.201484	3.72584	0.245785	3.65089	8.75094	0.55492	28.8566	4.14559	19.7203	2.70073	6.28821	0.881858	6.15991	0.768781	197.591	64.7987	661.293	97.7258	39357.4	0.653215	0.344763	60.8458	1	1	86.6519	7.824	62.0284	16.7995	2.14717	1.89468	0.0979879	949.229
527	4.30814	170.317	1.2456	11.6027	23.3185	2.47137	115.094	34.9601	422.165	145.866	650.913	146.048	1536.09	270.358	34.03	143.467	1554.12	461.876	38684.3	35.9889	8.97084	64.3372	1	1	3534.75	187.473	598.009	2749.27	14.6649	4.01177	0.0923143	956.819
528	0.00668861	1.26579	0.0312254	1.38154	5.1678	0.477789	29.8585	6.33299	39.904	6.69864	15.9268	2.43103	20.9412	3.27995	307.224	34.8889	1081.81	210.092	41015	2.29985	2.0611	69.378	1	1	133.704	2.68524	81.7411	49.2777	18.3513	1.11584	0.0322504	967.231
529	0.0262105	2.94913	0.160412	3.30877	10.8958	0.666652	35.3469	5.47237	31.5002	5.78808	18.2464	4.31652	46.0636	8.32093	264.393	73.9761	813.59	182.363	37324	0.814563	0.380311	74.7054	1	1	173.062	6.44452	83.8819	82.7356	12.8381	2.14183	0.0909256	977.616
530	0.0197756	2.2717	0.136182	2.23945	6.74645	0.40915	24.4641	4.29137	20.5602	3.28433	6.15688	0.781771	5.38794	0.793033	164.96	52.3092	493.186	94.6123	37556.1	0.919121	0.413938	75.9327	1	1	77.5423	4.66711	56.4713	16.4039	3.5148	2.22043	0.106064	979.927
531	0.0267988	1.58976	0.0769074	1.65825	7.21532	0.386737	33.685	7.14718	33.862	4.47198	11.6285	2.1649	22.862	4.30031	219.521	35.3477	752.018	150.868	40672.5	1.56493	1.03264	69.1855	1	1	131.076	3.35171	82.2963	45.4277	13.5536	1.51546	0.0470038	966.844
532	0.631113	2.75724	0.169378	1.91244	6.62918	0.553794	37.3511	8.96641	63.3985	13.1704	51.0424	11.9013	142.717	27.507	372.143	45.14	1340.18	443.098	40629.4	2.26163	2.20917	71.3806	1	1	368.707	5.47017	116.899	246.338	45.033	1.02375	0.0336821	971.205
533	14.6797	37.6054	3.94931	15.1575	7.55074	0.868844	47.0388	14.8514	119.051	28.8328	109.165	26.2452	282.195	50.926	605.127	96.7534	2009.55	906.824	41293.6	2.34163	2.24939	97.3952	1	1	758.117	71.3919	189.36	497.365	6.96668	1.041	0.0481468	1016.32
534	6.64411	20.9902	2.51369	11.2535	9.95065	0.879218	58.4623	12.7332	64.3071	8.52872	18.0629	2.17532	17.2988	2.64997	467.338	52.4064	1707.98	278.409	43481.8	2.56876	3.86526	87.1264	1	1	236.45	41.4015	146.332	48.7157	1.17666	0.664576	0.0306833	999.772
535	0.02	1.54412	0.0502394	1.20515	5.95063	0.347761	31.7358	6.87158	37.9482	5.94101	12.3124	1.61392	12.6953	2.05406	415.168	46.7749	1515.21	180.986	41440.8	2.61614	2.8223	69.5329	1	1	120.29	2.81951	82.8539	34.6167	12.2776	0.926953	0.0308703	967.542
536	0.0662187	4.08519	0.248612	4.68548	9.68621	0.654725	31.1533	4.89735	25.2272	3.67188	7.88722	1.03186	7.63952	1.17283	268.731	111.915	716.925	114.777	37422.5	0.516962	0.0916457	68.1708	1	1	102.108	9.0855	71.6188	21.4033	2.35577	5.64088	0.156105	964.792
537	0.519921	3.86753	0.275833	2.90972	6.86708	0.456345	30.8024	6.5629	50.3546	12.9332	56.1203	14.253	175.228	33.2423	317.673	74.367	1051.95	409.199	38956.6	1.48881	1.60057	68.8928	1	1	394.394	7.57301	95.0434	291.777	38.5286	0.930179	0.0706942	966.255
538	0.0052412	0.10274	0.00222687	0.0389128	0.166883	0.120139	1.73053	0.974811	16.5967	8.80204	54.6576	15.4684	197.544	50.199	13.7889	0.784034	35.1938	290.67	7878.65	0.366011	0.180644	1.69926	1	0.7	346.409	0.149121	19.5891	326.671	2190.65	2.02614	0.0222776	628.116
539	0.140067	1.20433	0.103553	0.815187	0.615773	0.621147	2.47477	0.759995	9.29298	3.94264	20.9451	5.51401	67.1341	16.4852	70.7595	2.42502	181.711	131.069	8546.65	0.308927	0.212624	9.17684	1	0.7	130.049	2.26313	13.7647	114.021	50.382	1.45293	0.0133455	771.826
540	0.0126676	0.277243	0.015441	0.158632	0.17022	0.169167	1.34643	0.526638	7.99712	4.15321	24.2466	6.87985	87.0492	22.2183	55.114	0.909626	141.954	148.392	7623.87	0.324484	0.147266	1.4349	1	0.7	155.221	0.463983	10.2096	144.547	311.535	2.20339	0.00640789	615.858
541	0.160272	2.68695	0.184648	2.02326	1.57572	1.31564	4.53096	0.900526	10.4765	4.22858	21.4055	6.04195	75.2513	19.1194	52.3795	1.24768	138.726	147.677	7833.13	0.304482	0.164845	10.4197	1	0.7	149.901	5.05513	18.7993	126.047	24.9344	1.84708	0.00899383	784.528
542	0.01	0.178822	0.01	0.0141302	0.107845	0.0875186	0.725104	0.254676	4.65818	2.32841	14.4959	4.17069	53.9771	14.2065	45.4613	1.00932	118.513	84.0889	8280.7	0.174302	0.101281	0.794512	1	0.7	95.2248	0.212952	5.83333	89.1785	418.773	1.72096	0.00851653	575.507
543	0.0760052	0.287212	0.0299782	0.108683	0.187346	0.1275	1.56976	0.674954	10.9305	5.47594	32.5258	9.2885	116.95	28.1737	34.4132	1.46078	95.6971	182.033	8316.21	0.364361	0.227817	1.12397	1	0.7	206.406	0.501878	13.4901	192.414	383.388	1.59936	0.0152646	598.73
544	0.01	0.161824	0.00287838	0.027981	0.287037	0.188189	2.36054	0.934348	14.2938	7.07237	41.5062	11.9436	155.002	39.4035	32.3184	1.2514	88.1055	240.313	7860.05	0.232306	0.15921	1.18871	1	0.7	273.195	0.202683	18.0639	254.928	1257.77	1.45911	0.0142034	602.599
545	0.01	0.0720133	0.01	0.0251875	0.117234	0.0929403	1.17285	0.511796	9.10696	4.62353	28.3768	8.3602	111.218	29.5122	28.5121	1.0064	77.0806	155.17	8559.09	0.216369	0.14798	1.45612	1	0.7	193.209	0.117201	11.0018	182.09	1553.66	1.46214	0.0130565	616.909
546	0.189987	2.98918	0.323646	3.31914	2.10154	4.26666	5.63265	1.11312	14.8965	6.57598	35.7401	10.2007	126.261	29.4993	49.6643	1.4028	129.356	227.574	8021.11	0.358319	0.22291	7.653	1	0.7	243.109	6.82195	28.0104	208.277	30.5304	1.60746	0.0108445	754.189
547	0.0135265	0.590647	0.0540224	0.754321	0.759291	0.570825	3.25428	1.08408	16.6941	8.23786	49.8937	14.7275	184.643	45.877	39.8288	1.07528	104.16	277.511	8008.95	0.28669	0.177789	1.92058	1	0.7	327.154	1.41252	22.3626	303.379	214.779	1.61253	0.0103234	637.205
548	0.101543	3.41252	0.152215	1.71357	1.68101	0.856861	3.2177	1.33303	17.7515	7.72274	44.8904	12.0434	144.411	34.7509	55.4057	2.32182	138.637	265.761	7959.06	0.353073	0.259432	8.89583	1	0.7	274.038	5.37985	24.8401	243.818	45.3206	1.36095	0.0167475	768.763
549	0.00122611	0.0757201	0.01	0	0.0320537	0.0348057	0.643908	0.302407	5.09323	2.62728	17.3969	5.04038	65.7542	16.0824	13.4329	0.227675	36.0582	92.1743	8423.97	0.255875	0.15764	0.854707	1	0.7	113.095	0.0869462	6.1064	106.901	1229.51	1.62316	0.00631408	580.292
550	0.0247507	0.85356	0.0666421	1.24823	0.910055	0.9349	2.97169	0.841703	11.7753	5.24527	28.3005	7.76213	94.2431	23.2162	40.2226	0.879801	105.111	171.791	7877.94	0.300594	0.23698	4.54491	1	0.7	178.394	2.19318	17.4337	158.767	72.3912	1.26843	0.00837022	706.727
551	0.01	0.114381	0.00266379	0.010349	0.108018	0.106229	1.08602	0.623949	11.5325	6.81437	43.447	13.3076	166.423	41.0259	25.2081	0.895013	66.2005	237.485	7974.47	0.234504	0.105553	0.961469	1	0.7	284.612	0.137394	13.4567	271.018	1972.56	2.22166	0.0135197	588.12
552	0.0411088	0.401211	0.0166348	0.127239	0.165239	0.14775	1.35551	0.593662	9.15533	4.68052	27.8361	7.97419	103.583	26.3354	47.2972	1.21036	129.761	161.542	8123.13	0.212813	0.1853	0.788379	1	0.7	182.413	0.586194	11.4175	170.409	290.705	1.14848	0.00932763	575.002
553	0.00376301	0.14596	0.001611	0.0187445	0.124934	0.106935	1.3025	0.69358	10.8946	5.67191	34.5242	10.0635	127.538	31.9739	25.7924	1.00203	68.1103	188.636	8315.11	0.250234	0.187345	0.994603	1	0.7	223.064	0.170079	13.1226	209.771	1233.38	1.33568	0.0147119	590.4
554	0.058726	1.64956	0.133893	1.58386	0.798847	0.941477	3.00899	0.765377	10.4372	4.64922	27.2598	7.76446	97.8841	24.154	88.5825	1.63817	233.308	163.29	8045.22	0.195076	0.112156	2.1829	1	0.7	181.09	3.42604	15.9519	161.712	47.2007	1.73933	0.0070215	646.908
555	0.756393	0.732394	0.0643475	0.120083	0.219732	0.189381	2.06124	0.806037	12.5944	5.06158	23.8732	5.69228	58.3309	11.2344	19.0256	1.7079	49.3377	175.91	9855.97	0.169823	0.0830397	1.51558	1	0.7	121.736	1.67322	15.8708	104.192	62.2707	2.04508	0.0346166	619.787
556	0.111082	0.719238	0.0203128	0.0589782	0.176269	0.10471	1.5951	0.64372	10.4107	5.23323	29.9264	8.42166	104.803	25.5819	54.9272	1.99113	145.954	172.566	9396.82	0.233989	0.165965	1.69275	1	0.7	187.806	0.909611	12.9305	173.966	191.253	1.40987	0.0136421	627.835
557	0.0381135	0.727397	0.00984853	0.0619643	0.219265	0.159185	1.77589	0.777431	11.57	5.8468	32.1906	8.38775	97.1135	22.265	18.8921	1.73679	48.7652	197.102	9490.96	0.196209	0.0610561	1.62055	1	0.7	181.143	0.837323	14.5018	165.804	198.016	3.21358	0.0356154	624.645
558	0.00409551	0.42265	0.00396621	0.0307206	0.167974	0.132032	1.88521	0.796065	11.7019	5.32246	27.6705	6.66147	65.6839	13.659	27.9258	2.50567	70.6982	177.101	10239.9	0.179768	0.0612332	0.54275	1	0.7	134.142	0.461432	14.6832	118.997	257.887	2.93579	0.0354418	551.38
559	0.00165173	0.384311	0.00213215	0.0309689	0.0784634	0.0769373	1.16088	0.584485	9.09407	4.75654	26.5999	7.30696	87.3059	20.6417	25.2542	1.94095	64.9448	155.77	11089.8	0.192737	0.0708986	1.39904	1	0.7	158.025	0.419064	10.9948	146.611	349.854	2.71849	0.0298862	614.052
560	0.01	0.378873	0.00087491	0.0305063	0.117217	0.0988749	1.09932	0.611292	9.11846	4.8994	27.2868	7.75061	96.6706	23.5534	20.7705	2.57415	53.3625	160.027	9294.29	0.180906	0.0944757	1.57547	1	0.7	171.626	0.420254	11.0452	160.161	381.104	1.91484	0.0482389	622.592
561	0.01	0.467477	0.01	0.0422714	0.167534	0.146722	1.82257	0.828621	12.7503	6.24887	34.6107	9.73399	114.419	27.7728	31.9683	3.03491	82.0472	210.083	9961.87	0.173939	0.0650075	0.689759	1	0.7	209.031	0.529749	15.7157	192.785	363.918	2.67567	0.0369898	566.392
563	0.01	0.457417	0.000803087	0.0140165	0.0540846	0.0852567	0.795132	0.37983	6.30094	3.46521	21.5109	6.33904	81.347	21.2987	14.8191	2.15836	38.7508	116.704	9548.53	0.176328	0.0505975	0.377124	1	0.7	142.058	0.482236	7.61525	133.961	277.791	3.48491	0.0556983	529.577
564	0.0972293	0.981591	0.0394678	0.162705	0.343937	0.208641	2.22087	0.92401	12.5649	6.15695	35.5582	9.82248	114.594	28.4311	58.0265	3.41468	150.185	212.618	9329.95	0.264699	0.115574	1.91506	1	0.7	212.106	1.28099	16.2624	194.563	151.884	2.2903	0.0227364	636.99
565	0.00378521	0.389781	0.000810207	0.0331625	0.114899	0.119513	1.35532	0.628066	9.01154	4.30579	22.3013	5.51646	60.8436	13.3825	18.8901	1.97896	49.2249	143.438	9576.4	0.191018	0.0503899	0.790841	1	0.7	118.007	0.427539	11.2293	106.35	248.748	3.79081	0.0402024	575.205
566	0.01	0.377832	0.0018805	0.0218825	0.114299	0.0912956	1.10016	0.510886	7.21823	3.02922	13.5276	3.09486	30.8845	5.80652	16.3461	1.89991	42.3597	101.355	9930.97	0.167922	0.0447068	0.914827	1	0.7	65.7892	0.411595	9.03487	56.3427	136.889	3.75608	0.0448519	584.796
567	0.0135084	0.474277	0.002365	0.0321033	0.111817	0.0618283	0.938149	0.393911	6.19384	3.08378	16.2521	4.32586	48.8726	10.8676	25.2749	1.8884	66.3824	101.448	9561.15	0.199651	0.0723469	1.15193	1	0.7	91.6237	0.522254	7.69954	83.4019	159.696	2.75963	0.0284473	600.423
568	0.00124855	0.44655	0.00320632	0.0139906	0.135344	0.107769	1.33302	0.600903	9.42016	4.18453	19.4197	4.6008	46.0723	8.27608	25.7198	1.85642	68.9991	139.513	10691.4	0.157367	0.0531266	0.442217	1	0.7	94.6157	0.464996	11.5972	82.5535	177.536	2.9621	0.026905	538.969
569	0.0708992	0.618682	0.0102454	0.0397472	0.102671	0.110524	1.84917	0.841267	12.11	6.12143	36.9423	9.94124	121.808	29.472	51.3392	2.56237	136.099	209.585	9403.42	0.238687	0.146231	1.11654	1	0.7	220.038	0.739573	15.0136	204.285	276.22	1.63226	0.0188272	598.274
570	0.01	0.345267	0.01	0.0534355	0.160902	0.114314	1.62614	0.716006	9.22652	3.81458	17.5988	4.01258	40.7149	7.81094	13.4116	1.60136	35.8431	130.851	10641.3	0.176302	0.0214811	0.524946	1	0.7	86.2144	0.418703	11.8439	73.9519	176.621	8.20731	0.0446768	549.333
571	0.0148348	0.506611	0.0028664	0	0.102711	0.0514851	0.907935	0.390152	6.65765	3.0631	16.9092	4.47422	50.2098	11.063	23.7994	1.50017	63.4759	107.209	9726.84	0.189681	0.0919553	0.829846	1	0.7	94.3536	0.524313	8.10994	85.7193	163.489	2.06276	0.0236337	578.352
572	0.0205473	0.968133	0.00589237	0.0171191	0.157455	0.129558	1.48261	0.693409	9.52877	4.42411	23.3251	6.14457	69.5473	15.9255	21.0013	2.05967	55.7873	149.655	9709.14	0.22202	0.0913576	1.28746	1	0.7	132.37	1.01169	11.9918	119.367	117.987	2.43023	0.0369201	608.172
573	0.00943549	0.476495	0.00435249	0.0353938	0.174528	0.17055	1.67236	0.761339	11.7128	5.9627	34.2627	9.23029	114.291	27.3102	16.4284	2.83074	43.562	201.501	9451.39	0.19321	0.070065	1.49671	1	0.7	206.074	0.525677	14.4916	191.057	363.449	2.75758	0.0649819	618.884
574	0.01	0.440596	0.0014266	0.00830169	0.0625233	0.106406	1.06127	0.484992	8.29207	4.22909	24.9875	7.18538	87.793	22.0059	20.0776	1.81728	53.5863	147.938	9390.35	0.193753	0.0827602	0.0769492	1	0.7	156.668	0.460324	10.0073	146.201	317.604	2.34114	0.0339131	446.502
575	0.026735	0.666218	0.00572287	0.0666022	0.259471	0.212184	2.6243	1.14612	17.844	8.67287	50.1124	13.7484	164.737	38.6019	60.1084	4.43516	159.923	287.294	9550.85	0.264977	0.160037	0.785654	1	0.7	298.724	0.765278	22.0861	275.872	360.486	1.65572	0.0277332	574.777
576	0.01	0.615853	0.01	0.0577373	0.0447536	0.0989461	2.33241	0.872271	12.993	6.28927	34.5845	9.17762	99.2554	23.0227	87.9847	53.2886	117.277	207.678	7952.68	0.109382	0.097944	1.755	1	0.7	189.365	0.693591	16.3414	172.33	248.46	1.11678	0.454381	630.495
578	0.00161951	0.147662	0.01	0.024185	0.119365	0.168877	1.32544	0.572818	7.74456	3.28411	16.0596	3.95873	42.8154	9.6663	4.57784	0.395044	11.7124	113.178	9567.94	0.0956001	0.0227725	0.815762	1	0.7	85.8986	0.183466	9.93106	75.7841	413.068	4.19805	0.0337286	577.23
579	0.01	0.238563	0.01	0.0717835	0.159259	0.125769	1.66722	0.629192	9.48512	4.11964	20.4745	4.79722	51.3205	11.0011	2.82266	0.990659	7.08033	144.826	9734.43	0.115047	0.0151103	1.09859	1	0.7	104.11	0.330346	12.0666	91.713	277.627	7.6138	0.139917	597.162
580	0.01	0.283415	0.00202023	0.0352375	0.0819207	0.0716976	1.01824	0.322331	4.45832	1.72562	8.10087	1.69797	17.2406	3.46705	17.3726	5.70834	41.7036	59.1422	9650.73	0.165047	0.0329731	1.32001	1	0.7	38.5153	0.330673	5.9525	32.2321	97.4743	5.00551	0.136879	609.93
581	0.01	0.224347	0.00883112	0.0616032	0.37011	0.28045	2.41066	1.01616	12.9371	5.33014	25.1733	5.81157	63.2032	12.8885	13.8916	1.10609	34.3502	182.475	9781.84	0.19661	0.126135	0.0431895	1	0.7	129.726	0.304782	17.0144	112.407	368.811	1.55873	0.0322003	420.419
582	0.0092595	0.455561	0.00237728	0.0119045	0.160655	0.150634	1.40091	0.673371	8.74402	3.93361	19.0636	4.52787	45.1411	9.03231	28.9952	4.00583	77.7272	128.786	10723.9	0.332594	0.133997	0.316719	1	0.7	93.3072	0.479103	11.1296	81.6985	170.524	2.48209	0.051537	519.528
583	0.01	0.283468	0.00380601	0.13235	0.372444	0.344432	2.75267	0.97888	13.2961	5.30255	23.1821	5.25214	51.4345	9.45423	4.81518	3.29424	12.603	171.374	10928.4	0.158749	0.021305	0.839332	1	0.7	112.8	0.429624	17.7445	94.6255	220.252	7.45125	0.261386	579.098
584	0.01	0.175058	0.00194183	0.0506361	0.111381	0.120067	1.69937	0.712108	9.00785	3.881	18.6329	4.65431	48.5384	11.2309	5.18719	1.00663	13.3256	134.163	9757.03	0.154493	0.0135513	7.0548	1	0.7	98.8259	0.237636	11.6508	86.9375	365.844	11.4006	0.0755415	746.475
585	0.01	0.0347159	0.00241572	0	0.0218304	0.0958054	0.727077	0.270265	3.09864	0.976348	3.91979	0.815522	7.61895	1.48756	3.81522	0.0913683	10.3024	35.5734	10751.7	0.131573	0.0156361	0.561655	1	0.7	19.0789	0.0471316	4.21362	14.8182	314.4	8.41467	0.00886865	553.492
586	0.00795242	0.234787	0.05	0.0297476	0.0762205	0.0700521	0.886786	0.34191	4.68203	1.48883	6.33931	1.34492	12.5453	2.24589	5.7055	0.639292	15.0163	54.7561	9685.55	0.168647	0.0347309	0.769685	1	0.7	30.3437	0.322487	6.05699	23.9642	74.3106	4.85581	0.0425731	573.443
587	0.01	0.351976	0.00253007	0.0952545	0.110945	0.184124	1.63748	0.62313	7.88345	3.34895	14.0036	3.03725	28.3891	5.43291	16.3859	3.29125	41.4569	111.532	9677.64	0.255763	0.0603253	0.821219	1	0.7	65.1107	0.45976	10.4391	54.2118	117.913	4.23972	0.0793896	577.667
588	0.01	0.250614	0.00583233	0.0971966	0.246335	0.228862	1.92267	0.667907	8.69613	3.12878	14.69	3.18151	31.901	6.7095	6.68464	1.23652	17.1233	110.566	9640.14	0.224138	0.0463423	1.13179	1	0.7	71.7363	0.363643	11.7619	59.6108	163.927	4.83659	0.072213	599.208
589	0.01	0.209765	0.01	0.0164171	0.0701908	0.0906883	0.984442	0.334911	4.43566	1.90439	7.98446	1.90151	17.9996	3.40112	13.4544	2.50673	34.6676	62.9453	10409	0.200298	0.0356314	0.910018	1	0.7	39.3531	0.246182	5.91589	33.1911	134.823	5.62137	0.0723077	584.445
590	0.01	0.155035	0.01	0	0.0401137	0.0702126	0.716226	0.261757	3.29653	1.2508	5.16808	1.13439	10.8017	2.16959	7.55743	1.22431	19.8234	42.0081	10172.6	0.171971	0.0518448	1.27876	1	0.7	25.0845	0.175035	4.38484	20.5246	117.26	3.31703	0.061761	607.696
591	0.00116923	0.23702	0.01	0.0176009	0.066819	0.114036	0.816578	0.349477	4.77675	1.97739	9.28237	2.06733	20.5158	4.30792	7.50929	1.39231	19.3248	68.0967	9865.26	0.129492	0.0180948	1.07008	1	0.7	44.5403	0.26579	6.12366	38.1509	143.537	7.15631	0.072048	595.364
592	0.01	0.518177	0.01	0.0449332	0.115026	0.164119	1.59178	0.682281	9.34936	4.4629	23.1245	6.01413	61.1884	14.0187	20.7934	5.66216	52.3872	147.413	9588.19	0.317125	0.0908553	0.839951	1	0.7	121.294	0.58311	11.9026	108.809	186.6	3.49044	0.108083	579.146
593	0.01	0.0601026	0.01	0	0.11976	0.09655	1.16188	0.552123	7.07001	2.60348	12.0165	2.59507	25.4986	5.30372	6.04949	0.171661	17.0556	92.0925	10524.2	0.125719	0.0150645	0.835945	1	0.7	57.0978	0.0801026	9.00032	48.0174	599.449	8.34539	0.0100647	578.832
594	0.0880003	6.26576	0.0980589	0.958312	0.810341	0.588572	2.48894	0.473941	3.64531	0.863649	2.65037	0.408549	3.04967	0.491394	67.8781	59.0892	163.22	27.1557	10964.3	0.16403	0.0703906	7.91496	1	0.7	22.8809	7.41013	8.00711	7.46363	1.00722	2.33029	0.362022	757.413
595	0.119808	6.27656	0.0515324	0.931576	1.59549	0.705622	5.14091	1.06022	8.96521	2.14121	6.86699	1.07962	9.30593	1.59987	72.804	84.4871	180.254	65.9697	10962.7	0.18199	0.0357022	11.0682	1	0.7	45.8406	7.37948	17.4675	20.9936	2.84487	5.09745	0.468711	790.675
596	0.00105806	5.15449	0.0150973	0.435459	0.856215	0.39721	2.6913	0.524124	3.48394	0.805719	2.36814	0.367867	2.96427	0.440488	50.9988	42.2895	126.377	24.2013	10632	0.114723	0.0386371	2.81691	1	0.7	20.5054	5.6061	7.95278	6.94648	1.23909	2.96923	0.33463	666.861
597	0.0148559	4.5689	0.00963205	0.213559	0.459103	0.221204	2.50337	0.54796	4.7463	1.22117	3.85105	0.644174	4.95974	0.737027	57.9021	48.9035	140.932	36.6963	10647.8	0.264314	0.106105	2.47352	1	0.7	24.698	4.80694	8.47793	11.4132	2.37431	2.49107	0.347001	656.581
598	0.00349087	5.52091	0.016974	0.319595	0.579122	0.400502	2.21717	0.632484	4.69136	1.17602	3.75566	0.670473	5.27118	0.814059	44.4645	30.0813	111.986	35.7578	10664.8	0.137659	0.0917814	2.75331	1	0.7	26.069	5.86097	8.52063	11.6874	1.99411	1.49985	0.268616	665.039
599	0.00222823	4.13549	0.00816704	0.324664	0.545901	0.333001	2.16116	0.394234	3.56964	0.883428	2.67021	0.516304	3.77962	0.642407	27.1948	18.735	67.6725	27.263	11332.8	0.12981	0.0390493	1.13581	1	0.7	19.9665	4.47055	7.00394	8.49197	1.89953	3.32425	0.276849	599.451
600	0.00793839	4.60071	0.00440047	0.249835	0.59574	0.273278	3.32403	0.891681	7.09124	2.15317	6.65486	1.18	9.20585	1.46415	61.7433	56.8041	151.008	61.8817	10572.2	0.194568	0.0891378	1.94311	1	0.7	37.6969	4.86288	12.176	20.658	4.2481	2.18278	0.376166	638.081
601	0.00295985	5.20662	0.0105219	0.403353	0.918334	0.47718	3.75968	0.825399	7.74455	2.05605	6.52263	1.02709	8.16752	1.36039	45.9823	32.4933	113.834	57.9594	10678	0.165371	0.0548095	2.50357	1	0.7	38.4823	5.62345	13.7251	19.1337	3.40248	3.0172	0.285445	657.526
602	0.0141129	5.03653	0.0190612	0.244264	0.675002	0.396675	3.77923	0.980618	9.52819	2.71056	8.99578	1.60034	12.5975	1.91676	59.3702	51.5499	145.406	79.262	10534.3	0.227	0.118399	2.0571	1	0.7	48.4946	5.31397	15.3597	27.8209	5.23542	1.91725	0.354525	642.384
603	0.00221138	5.79703	0.0137664	0.470505	0.873263	0.4385	4.17967	1.02669	9.48097	2.67776	8.50339	1.60502	12.5434	1.97585	62.5579	43.0926	156.464	78.296	10877	0.287196	0.164592	3.51156	1	0.7	49.588	6.28351	15.9991	27.3054	4.34556	1.74489	0.275415	684.82
604	0.00117669	5.79449	0.0166827	0.403954	0.967085	0.338152	3.40133	0.788869	5.65788	1.39394	4.19932	0.708402	5.30113	0.811024	52.0936	33.1369	130.115	40.7344	11316.4	0.223375	0.127824	2.99454	1	0.7	29.7834	6.2163	11.1533	12.4138	1.99698	1.74753	0.254674	671.775
605	0.0103626	6.21928	0.0288198	0.276907	0.735988	0.309756	3.01262	0.786231	6.94777	1.63718	5.7378	1.03538	7.58784	1.28289	70.6135	64.846	173.228	48.6391	11100.4	0.273562	0.110268	3.37844	1	0.7	35.6088	6.53537	11.7924	17.2811	2.64424	2.48087	0.374338	681.621
606	0.01	7.15605	0.0257241	0.516593	1.39246	0.447123	5.33611	1.28433	9.38359	2.21368	6.96479	1.18561	8.58409	1.38363	60.9853	46.2896	155.505	66.5389	11807.4	0.216742	0.157637	2.12568	1	0.7	45.8838	7.70836	17.8436	20.3318	2.63763	1.37495	0.297673	644.878
607	0.01	6.15466	0.0161154	0.378558	0.832425	0.366223	3.78583	0.973414	7.89854	2.109	5.95343	1.01725	7.33228	0.992606	64.7071	62.0707	159.792	58.8621	11208.7	0.175321	0.0822218	2.24348	1	0.7	37.8203	6.55934	13.8564	17.4046	2.6534	2.13229	0.388447	649.009
608	0.01	5.9069	0.0202027	0.409951	0.731619	0.354726	3.44494	0.989793	8.45163	2.55569	8.69486	1.48357	11.5596	1.89788	68.4128	58.0564	171.582	73.2555	10648.6	0.219531	0.108005	3.34017	1	0.7	46.5114	6.34705	13.9727	26.1916	4.12658	2.0326	0.33836	680.683
609	0.00408697	5.37695	0.0309139	0.565132	0.828754	0.38476	2.9543	0.508648	3.58795	0.726914	2.30244	0.382359	3.03228	0.53162	52.3901	48.8163	132.568	23.9382	11111.2	0.143839	0.0415702	2.80588	1	0.7	21.2171	5.97708	8.26442	6.97561	1.16706	3.46014	0.368237	666.547
610	0.01	5.97634	0.0311324	0.538932	1.12347	0.50919	3.56997	0.737997	5.88223	1.57503	5.14034	0.835015	7.08442	1.07967	58.2881	49.4378	144.206	47.3347	11106.5	0.147841	0.0616206	2.50633	1	0.7	34.0937	6.5564	11.8229	15.7145	2.39681	2.39921	0.342827	657.613
611	0.0021558	5.50545	0.023073	0.294498	0.511115	0.222763	1.74074	0.350175	2.33815	0.548568	1.55822	0.263517	1.90891	0.310981	59.5299	60.3184	145.119	16.4795	11089.2	0.1424	0.0616586	2.68547	1	0.7	15.5783	5.82518	5.16294	4.59019	0.787992	2.30948	0.415648	663.056
612	0.01	4.9259	0.010537	0.253362	0.524429	0.281965	3.03235	0.742958	7.82521	2.62524	9.50664	1.80188	15.1986	2.56969	46.79	30.2623	116.977	75.745	10920.7	0.386014	0.218546	3.31162	1	0.7	49.3087	5.1998	12.4069	31.702	6.09677	1.76628	0.258704	679.977
613	0.01	8.64109	0.0679742	1.67062	3.03991	1.24298	10.3018	2.04818	13.5795	2.98816	8.64834	1.39884	9.64467	1.42096	99.7443	157.86	235.761	86.4126	11302.6	0.161991	0.0740392	3.46852	1	0.7	64.7031	10.3897	30.2124	24.101	2.3197	2.18791	0.669578	683.797
614	0.00125614	5.55105	0.0293219	0.315711	0.739845	0.361242	3.10931	0.63894	5.55496	1.34017	4.37479	0.689681	5.56669	0.846372	48.1776	36.3858	122.556	40.7392	11132.2	0.19436	0.0701544	2.728	1	0.7	29.1194	5.89734	10.4043	12.8177	2.17347	2.77046	0.296892	664.304
615	0.00482498	5.47226	0.0172065	0.468928	0.787826	0.400436	3.9924	0.937601	6.95819	1.69293	5.16167	0.874238	6.48044	1.07099	64.9334	60.7144	161.823	50.8792	11484.2	0.128834	0.0422967	2.5497	1	0.7	34.3199	5.96322	13.0765	15.2803	2.56242	3.04596	0.37519	658.959
616	0.0109282	0.142799	0.0068468	0.119696	0.01	0.0638483	0.47951	0.214358	2.0933	1.0708	4.50989	0.924979	8.74796	1.59511	4.33694	1.4339	9.77463	32.8606	9134.72	0.121917	0.0208614	2.54789	1	0.7	19.99	0.280271	2.86102	16.8487	60.1159	5.84415	0.146696	658.904
617	0.01	0.210061	0.000745407	0.043294	0.0959543	0.0994988	0.826244	0.356985	4.84451	2.26092	11.5519	2.89146	31.4896	7.13736	15.0667	8.03169	38.2599	71.8532	8524.13	0.156795	0.089712	1.54013	1	0.7	61.8185	0.2641	6.22319	55.3312	209.508	1.74776	0.209924	620.948
618	0.01	0.216907	0.00386704	0.0404387	0.0838771	0.0680732	0.714107	0.394773	5.29769	2.40622	12.1362	3.2628	35.5085	8.15542	32.1955	16.8009	81.089	75.4945	8585.43	0.196001	0.149442	2.29351	1	0.7	68.2989	0.271213	6.55852	61.4692	226.645	1.31155	0.20719	650.709
619	0.00847476	0.277468	0.00621147	0.0947506	0.205345	0.181483	2.01914	0.85974	10.8252	4.58573	22.3101	5.45101	58.2726	12.6886	25.6879	18.9542	64.7755	144.283	8635.66	0.187378	0.143782	2.0489	1	0.7	117.786	0.386905	14.0909	103.308	267.012	1.30321	0.292614	642.081
620	0.00116192	0.24492	0.00298127	0.0346578	0.0960745	0.134155	1.47368	0.567965	8.19054	3.50015	18.1903	4.42083	48.4248	10.9159	28.7457	17.04	72.0974	113.011	8516.43	0.163149	0.0927927	2.16495	1	0.7	96.1982	0.283721	10.4624	85.452	301.183	1.75821	0.236346	646.276
621	0.01	0.300932	0.00183183	0.159756	0.230022	0.227818	2.58325	0.981859	13.4329	5.47166	25.5096	5.93994	63.7688	13.7482	25.1517	18.9127	61.611	163.932	8709.76	0.233621	0.148376	3.08441	1	0.7	132.367	0.47252	17.4558	114.438	242.187	1.57452	0.306969	674.17
622	0.01	0.28598	0.00295658	0.0387266	0.236336	0.149777	1.85405	0.706324	9.92847	4.34543	22.3677	5.79436	62.6188	13.9404	18.7793	12.4814	46.473	132.798	8922.07	0.244452	0.0869289	1.97706	1	0.7	122.279	0.337664	12.875	109.067	323.004	2.81209	0.268572	639.384
623	0.01	0.303121	0.01	0.0761314	0.258057	0.158034	2.27314	0.940251	12.0862	5.33778	25.7602	6.32889	68.3915	14.7491	25.582	18.1958	65.3795	165.368	9029.71	0.209418	0.121983	2.17841	1	0.7	136.682	0.399252	15.7157	120.567	301.983	1.71678	0.27831	646.75
624	0.00153181	0.161491	0.00196836	0.0214963	0.0804177	0.117167	1.21517	0.510642	7.52798	3.48557	18.472	4.67242	54.5484	13.0769	8.46479	4.41474	21.3589	110.611	9313.44	0.194913	0.0668896	1.41601	1	0.7	103.893	0.186488	9.45137	94.2554	505.424	2.91395	0.206693	614.911
625	0.01	0.136006	0.01	0.0114821	0.0805561	0.0880134	0.826081	0.345579	4.8886	1.92955	8.53847	1.77606	17.889	3.56481	6.51954	1.30355	16.3063	62.955	9121.1	0.132355	0.0319963	1.67839	1	0.7	40.0942	0.167489	6.22883	33.6979	201.195	4.13657	0.0799412	627.209
626	0.00318913	0.285539	0.00614951	0.071672	0.069852	0.129721	1.57161	0.603353	8.33048	3.66231	18.9897	4.89245	57.2576	13.0083	17.2632	9.24074	45.2981	117.192	9414.79	0.176467	0.131071	1.49933	1	0.7	108.882	0.36655	10.705	97.8103	266.841	1.34635	0.203998	619.01
627	0.01	0.224752	0.00226205	0.0219755	0.123389	0.11231	1.29367	0.526858	8.00737	3.52944	18.0511	4.44049	50.6613	11.3474	15.7913	10.6687	38.6627	110.898	9218	0.211592	0.13779	2.56244	1	0.7	98.3523	0.25899	10.0636	88.0297	339.896	1.53561	0.275944	659.351
628	0.01	0.270405	0.00114163	0.0599055	0.272568	0.127572	1.86941	0.766829	10.8932	4.34908	21.8099	5.36805	56.712	11.9574	24.8299	16.5088	62.8465	137.884	8857.34	0.204382	0.163466	1.90392	1	0.7	114.467	0.341452	13.9296	100.196	293.442	1.2503	0.262684	636.553
629	0.00335897	0.125232	0.00431571	0.0314284	0.221097	0.11271	0.961033	0.360753	4.97016	2.19784	11.1533	2.7142	30.2924	6.89279	6.54176	2.82461	16.0832	71.3557	9186.47	0.165523	0.051497	1.60789	1	0.7	60.0406	0.164335	6.62575	53.2505	324.037	3.21422	0.175625	624.073
630	0.01	0.240783	0.01	0.0127952	0.175087	0.0956417	1.18203	0.520883	7.52365	3.45483	17.5782	4.47143	49.9207	11.2504	15.3345	7.08554	38.5555	109.228	9158.41	0.183089	0.0951784	1.71691	1	0.7	96.4464	0.273578	9.49729	86.6756	316.822	1.92364	0.183775	628.877
631	0.0024083	0.39666	0.00561249	0.0748653	0.142617	0.180356	1.48238	0.52634	7.32961	3.17272	16.0982	3.95947	43.9634	9.41116	23.6144	12.2112	59.0024	99.7139	8628.05	0.258712	0.12874	2.43354	1	0.7	86.7457	0.479546	9.66131	76.6049	159.745	2.00958	0.206961	655.309
632	0.01	0.157801	0.00162175	0.0519241	0.238235	0.133193	1.31357	0.534412	7.1442	3.29491	17.0186	4.30471	46.8854	11.0715	6.68539	3.40095	17.1025	102.239	8954.56	0.152499	0.0452768	1.12008	1	0.7	92.1601	0.221347	9.36361	82.5751	373.058	3.36816	0.198857	598.492
633	0.0150068	0.22127	0.000802524	0.0513759	0.120643	0.103381	1.63592	0.645054	9.57645	4.11357	20.31	4.88592	50.0826	10.3274	8.54711	5.57859	20.9278	127.069	8843.12	0.175909	0.0847239	2.69745	1	0.7	102.089	0.288455	12.0814	89.7196	311.034	2.07626	0.266564	663.409
634	0.00325548	0.24165	0.00208857	0.0789874	0.221228	0.183303	2.47488	0.763527	10.2222	4.52812	22.2283	5.44329	60.5335	13.402	19.2132	13.0038	48.9034	137.714	8663.21	0.194718	0.150515	2.90719	1	0.7	120.326	0.325981	13.8651	106.135	325.587	1.29368	0.265907	669.389
635	0.01	0.257058	0.00373625	0.0391194	0.163423	0.156313	1.98058	0.773976	10.6588	4.36467	22.5197	5.54268	60.2242	13.394	16.914	11.511	41.9771	139.068	8271.81	0.160026	0.135752	2.23148	1	0.7	120.088	0.309914	13.7331	106.045	342.177	1.17881	0.274222	648.597
636	0.01	0.279786	0.01	0.0213283	0.192713	0.143861	1.66772	0.722848	9.89305	4.33314	20.6609	5.1053	51.8548	11.2209	11.8973	7.82537	29.3382	132.614	8796.54	0.148931	0.0587148	2.13792	1	0.7	106.116	0.321114	12.6202	93.175	290.162	2.53651	0.26673	645.316
637	0.01	0.214638	0.00338936	0.0196787	0.0579453	0.0744865	0.847872	0.30128	4.9868	2.26589	11.9381	3.1062	35.9335	8.3438	16.1848	4.57634	41.4484	71.8988	8595.63	0.233192	0.232881	1.1081	1	0.7	68.1036	0.247706	6.26838	61.5875	248.631	1.00134	0.11041	597.754
638	0.01	0.14235	0.01	0.0147368	0.0984279	0.0681081	0.517494	0.223047	2.77519	1.06568	4.27845	0.888108	8.51363	1.5523	5.28239	1.54334	13.3083	33.9945	9635.22	0.108492	0.0291824	0.65551	1	0.7	20.1575	0.177087	3.68226	16.2982	92.035	3.71771	0.115968	563.157
639	0.00242487	0.229262	0.000775953	0.0360329	0.168053	0.0987108	1.36795	0.556648	8.10657	3.6456	18.437	4.85341	52.3096	11.7358	11.7503	7.93821	28.6984	115.752	8537.91	0.196152	0.0967847	1.35741	1	0.7	101.548	0.268495	10.2979	90.9815	338.857	2.02669	0.276608	611.906
640	0.00194779	0.107582	0.00125272	0.029223	0.179536	0.149364	1.67155	0.568692	6.85231	2.51061	10.6687	2.32264	22.0275	4.30884	4.59161	1.06842	12.0675	81.5956	10614.3	0.12506	0.0229047	1.26088	1	0.7	51.3998	0.140006	9.42144	41.8383	298.833	5.46001	0.0885369	606.708
641	0.00568922	0.138565	0.000911007	0.0952603	0.218013	0.137963	1.31943	0.481527	6.21777	2.31735	11.1452	2.80965	30.1751	6.28127	5.70094	6.72786	14.3942	76.5667	9555.15	0.236376	0.0471294	1.51278	1	0.7	61.3437	0.240425	8.3747	52.7286	219.314	5.01547	0.467401	619.653
642	0.0180249	0.739673	0.0156605	0.174793	0.43891	0.309268	2.78651	1.19604	16.6093	8.14496	46.5533	12.7643	156.215	37.9217	20.7722	11.5073	51.1405	271.427	8956.46	0.16577	0.0742684	3.8006	1	0.7	283.887	0.948151	21.3401	261.599	275.905	2.23204	0.225013	691.433
643	0.01	0.577983	0.00153398	0.0356152	0.24077	0.217519	2.11894	0.970546	14.6043	7.31547	42.6398	11.9413	147.788	36.6363	20.0129	6.61514	50.5995	242.834	8582.32	0.183539	0.0843004	1.07261	1	0.7	265.098	0.625132	18.152	246.321	394.03	2.1772	0.130735	595.525
644	0.331896	2.18162	0.14062	1.1306	0.716674	0.343614	3.12112	0.98131	13.1788	5.97904	32.4029	8.72918	104.632	25.6466	11.973	3.41191	29.5013	191.024	8506.26	0.192016	0.0433398	2.00005	1	0.7	199.516	3.78474	18.3415	177.389	46.8697	4.43047	0.115653	640.256
645	0.01	0.594732	0.0017275	0.100311	0.329437	0.282911	2.95641	1.02759	16.0373	7.58479	43.6887	12.2204	142.033	35.2412	22.9865	6.66112	56.1613	259.962	9150.64	0.188857	0.0890463	1.81248	1	0.7	262.109	0.70677	20.6336	240.768	340.66	2.12088	0.118607	632.882
646	0.01	0.530253	0.00633167	0.0643461	0.140096	0.211991	1.43329	0.765658	11.6831	6.15765	34.7755	10.133	126.017	31.6485	14.4962	3.81053	37.0163	202.182	9024.92	0.15934	0.0735738	2.15431	1	0.7	223.577	0.610931	14.2341	208.731	341.661	2.16571	0.102942	645.899
647	1.50647	9.85495	0.976755	6.24933	2.67256	0.752329	5.40988	1.27519	14.0042	5.87348	30.7445	8.21854	94.4957	22.666	19.4093	14.813	45.6131	192.364	8886.23	0.197121	0.107191	4.64245	1	0.7	204.7	18.5875	24.1142	161.998	8.71544	1.83897	0.324752	708.575
648	0.00327191	0.531369	0.00420057	0.0549251	0.263591	0.289705	2.17784	0.945966	14.1838	7.14183	42.1695	11.7089	141.741	33.2857	30.3063	35.4988	72.9943	243.152	8703.94	0.233593	0.100549	2.22402	1	0.7	254.502	0.593766	17.8609	236.047	397.542	2.32317	0.486323	648.339
649	0.01	0.544089	0.01	0.00939089	0.161072	0.119306	1.33595	0.539862	8.85337	4.14822	24.0521	6.82069	82.8796	20.4829	19.565	5.71071	52.8462	139.734	8747.93	0.186757	0.0877537	1.84274	1	0.7	149.967	0.57348	11.0096	138.384	241.305	2.12819	0.108063	634.114
650	0.00113444	0.300856	0.00437147	0.0550562	0.281395	0.146809	1.7134	0.845904	12.3514	6.28238	36.8376	10.6973	134.702	34.2339	14.4001	1.62377	37.3524	211.871	8719.34	0.176067	0.0624351	13.3016	1	0.7	238.454	0.361418	15.3389	222.753	616.332	2.81999	0.0434717	809.835
651	0.0948636	0.705298	0.0501626	0.328548	0.248549	0.164171	2.15817	0.896912	13.2546	6.4231	37.4991	10.2556	126.667	31.1743	14.8017	3.54488	38.0324	214.749	8644.58	0.188386	0.0956863	1.70751	1	0.7	229.92	1.17887	16.7224	212.019	179.849	1.96878	0.0932068	628.473
652	8.44337	23.9461	1.6992	7.5613	1.35206	0.32183	2.65003	0.674393	8.22112	3.72229	20.5681	5.62312	67.3329	16.383	15.3067	3.77547	37.8872	125.181	7826.84	0.168243	0.0725614	2.29982	1	0.7	168.499	41.65	13.2194	113.629	2.7282	2.31863	0.0996504	650.921
653	0.0150817	0.398014	0.00483963	0.0846867	0.130877	0.130229	1.22381	0.517261	7.62116	4.1458	23.4667	6.68957	83.7131	20.3892	16.2227	2.83424	43.4548	139.245	9327.98	0.138723	0.0830153	3.67434	1	0.7	148.53	0.502622	9.62333	138.404	275.365	1.67105	0.0652227	688.597
654	0.00610825	0.736656	0.00261397	0.0990306	0.282873	0.252006	2.42485	1.14452	18.1434	8.88686	52.3586	14.6876	182.092	44.968	20.43	6.89129	54.2742	297.134	8682.01	0.213472	0.0593146	2.55068	1	0.7	326.085	0.844409	22.2477	302.993	358.822	3.59897	0.126972	658.99
655	0.0124481	0.504395	0.000724832	0.109405	0.217472	0.166944	1.78712	0.785287	12.9515	6.40557	37.4411	10.8836	133.044	34.1548	14.5941	3.89275	37.3707	212.158	8822.68	0.13704	0.0623233	1.43828	1	0.7	238.465	0.626973	15.9084	221.929	353.969	2.19886	0.104166	616.026
656	0.01	0.490851	0.00478862	0.0838261	0.153746	0.166708	1.63046	0.777539	12.4452	6.28805	36.5769	10.4913	129.375	32.7069	12.3982	3.92299	33.5859	204.708	9251.6	0.162201	0.0459135	1.63666	1	0.7	231.201	0.589465	15.1736	215.438	365.481	3.53274	0.116804	625.366
657	0.41387	5.27845	0.386306	2.60772	1.06985	0.443991	3.46754	1.01907	12.4693	5.22749	27.9576	7.09577	82.688	19.0377	101.945	32.7039	252.291	178.076	7560.54	0.244531	0.129887	6.55292	1	0.7	169.163	8.68635	18.4697	142.007	16.3482	1.88264	0.129628	739.58
658	0.0151859	1.82397	0.0168374	0.179538	0.46298	0.239589	3.13577	1.19303	16.3016	7.27478	41.7625	11.2224	133.379	30.5155	56.5769	34.3014	133.56	246.306	7253.46	0.214745	0.104714	1.54876	1	0.7	247.523	2.03553	21.333	224.154	110.121	2.05076	0.256824	621.352
659	0.378607	4.88713	0.263508	1.86264	0.957958	0.464928	3.02414	1.12789	14.6191	6.75115	37.225	9.84476	119.519	27.0088	108.588	48.5118	267.651	226.692	7409.75	0.176822	0.0616003	5.61243	1	0.7	227.934	7.39189	20.1941	200.348	27.1038	2.87047	0.18125	725.405
660	0.301171	5.32344	0.326173	2.50085	1.4097	0.658132	4.0954	1.14299	15.3132	7.20718	39.8526	10.7375	123.397	28.2772	71.9678	36.5274	178.494	245.658	7920.3	0.199755	0.0907144	2.21121	1	0.7	240.543	8.45163	22.6194	209.472	24.7848	2.20202	0.204643	647.896
661	0.01	1.40841	0.000929117	0.0431863	0.125234	0.0701093	1.48968	0.582856	8.35105	3.9468	21.5031	6.00599	69.4771	16.0005	40.8064	30.0116	97.8451	126.802	8123.07	0.16305	0.0806651	1.58677	1	0.7	129.015	1.46252	10.6189	116.933	79.9533	2.02132	0.306726	623.111
662	0.00140444	0.928282	0.00181738	0.047511	0.122527	0.104507	1.3806	0.57894	8.82404	4.313	23.3445	6.61368	77.7244	18.1739	32.7835	17.6041	85.3082	136.781	9319.38	0.212736	0.17073	1.51856	1	0.7	142.159	0.979015	11.0106	130.17	132.96	1.24604	0.206359	619.929
663	0.00239811	1.69807	0.00543037	0.153225	0.240618	0.182757	2.12099	0.980667	14.6216	6.64201	36.0499	9.67133	108.527	24.5984	79.2509	48.2051	193.338	216.167	8266.67	0.162949	0.100323	1.248	1	0.7	205.494	1.85912	18.1466	185.489	99.7721	1.62424	0.249331	605.99
664	0.01	1.33904	0.000683188	0.0357122	0.147503	0.0937844	0.986094	0.434307	6.43662	3.02157	16.9222	4.8551	57.9097	13.3633	39.9661	25.8286	100.593	102.078	8054.36	0.158938	0.105021	1.91516	1	0.7	105.556	1.38543	8.09831	96.0719	69.3443	1.51339	0.256765	636.994
665	0.0895761	2.16257	0.0466445	0.288349	0.365652	0.185623	2.0401	0.905963	12.5811	5.84843	31.2007	8.60504	100.537	22.4786	80.9649	42.1745	203.964	188.457	7699.47	0.151796	0.0761461	2.69131	1	0.7	187.335	2.58714	16.0784	168.67	65.1955	1.99349	0.206775	663.228
666	0.00879976	1.39951	0.00487767	0.0377659	0.142698	0.0738984	1.04752	0.513282	7.77865	3.83193	21.2741	6.00465	71.4233	16.1631	69.6522	30.459	181.036	125.167	8486.77	0.187895	0.0987572	1.71899	1	0.7	129.704	1.45096	9.55605	118.697	81.8061	1.90259	0.168248	628.966
667	0.01	1.45033	0.00671172	0.046764	0.217582	0.151908	1.52058	0.659879	9.64336	4.71238	25.1589	6.70437	79.2456	17.955	36.8514	26.598	88.6627	145.272	8672.92	0.240926	0.194442	1.47267	1	0.7	147.483	1.5138	12.1933	133.776	88.3709	1.23906	0.299991	617.72
668	0.00307944	1.85749	0.00796423	0.132942	0.275703	0.155141	1.98642	0.901267	13.8596	6.49015	35.3566	9.50355	110.47	25.3051	86.4642	45.5958	216.203	212.158	7687.68	0.178711	0.0877496	1.34343	1	0.7	206.305	2.00148	17.1781	187.125	93.4934	2.0366	0.210893	611.173
669	0.0136619	1.34773	0.010098	0.0733043	0.221511	0.142839	1.44604	0.526388	7.37546	3.6013	20.1074	5.64144	66.706	16.1183	30.4745	23.2872	80.7808	120.421	8273.24	0.193699	0.102186	2.85849	1	0.7	123.332	1.4448	9.71224	112.174	77.6403	1.89557	0.288276	668.034
670	0.00520883	1.55352	0.0190985	0.855043	1.78737	1.08372	4.059	1.27467	14.5812	5.5232	28.4117	7.14557	82.5407	17.9938	35.2157	35.5377	86.6832	172.413	8440.37	0.493066	0.314131	1.68792	1	0.7	166.834	2.43287	22.786	141.615	58.209	1.56962	0.409972	627.625
671	0.00137485	1.52271	0.010675	0.108613	0.160937	0.211271	1.99892	0.803285	12.1521	5.81443	31.7649	8.62971	100.127	22.2114	53.4414	47.9036	133.111	188.275	7900.2	0.214085	0.165046	1.41067	1	0.7	185.518	1.64337	15.3265	168.548	102.562	1.29712	0.359878	614.642
672	0.0175331	1.4447	0.0061064	0.0607974	0.123615	0.119751	1.16017	0.492695	8.00278	3.72994	21.3607	5.80354	67.2408	15.5894	42.2652	35.3268	103.992	123.294	8138.47	0.184938	0.115595	1.9466	1	0.7	125.152	1.52914	9.89901	113.724	74.3715	1.59988	0.339708	638.216
673	0.0304206	0.242669	0.00985501	0.133742	0.122988	0.0548894	0.458299	0.169753	2.89227	1.43285	7.90851	1.97759	24.2618	6.17845	92.9917	53.4565	225.36	44.897	6090.27	0.124576	0.0627249	0.832212	1	0.7	45.8741	0.416688	3.6982	41.7592	100.217	1.98606	0.237205	578.538
674	0.106438	0.696028	0.0753401	0.349089	0.295448	0.135124	0.520836	0.208865	2.96083	1.37209	6.80946	1.79964	21.5152	4.90383	96.5605	65.8679	232.419	43.1357	6269.95	0.140845	0.078277	1.82977	1	0.7	41.7482	1.22689	4.1211	36.4002	29.6686	1.79932	0.283402	633.588
675	0.01	0.116826	0.01	0.0315185	0.0921532	0.0201169	0.227652	0.116909	2.4073	1.17303	5.54102	1.40084	16.4309	3.8091	96.403	59.9888	223.85	32.8468	6909.77	0.135378	0.0871182	1.15477	1	0.7	31.3874	0.168345	2.86413	28.3549	168.434	1.55396	0.267986	600.594
676	0.01	0.116931	0.00295086	0.00572195	0.00668938	0.0200838	0.246435	0.130306	1.68041	0.887601	4.92923	1.28515	15.7573	3.87691	92.3171	59.2849	226.524	29.2903	6428.66	0.181314	0.123582	2.25844	1	0.7	28.9558	0.135604	2.08392	26.7362	197.164	1.46716	0.261716	649.521
677	0.032576	0.374723	0.0267231	0.147282	0.0764973	0.0730951	0.624326	0.228688	3.52804	1.47051	7.72797	2.0635	23.657	5.41043	119.596	95.2627	281.638	47.6259	6732.84	0.164732	0.124363	1.95921	1	0.7	45.4414	0.581304	4.53065	40.3294	69.3776	1.32461	0.338245	638.701
678	0.0681535	0.424583	0.0162596	0.229738	0.0631479	0.0689764	0.515623	0.254133	3.28483	1.47478	7.58366	1.96593	20.1872	4.85661	134.578	91.5306	299.536	47.5063	5804.97	0.172001	0.0910192	0.8077	1	0.7	40.9936	0.738734	4.18671	36.0682	48.8243	1.88972	0.305574	576.581
679	0.0140651	0.153344	0.0136607	0.0741825	0.0618775	0.0405629	0.5218	0.206605	3.16298	1.66411	9.03419	2.49646	30.0386	7.41791	104.95	58.617	260.042	54.4922	6251.56	0.105055	0.0677086	1.51234	1	0.7	54.9003	0.255252	3.99382	50.6512	198.436	1.55158	0.225413	619.633
680	0.0520507	0.276831	0.00518145	0.0904752	0.0351396	0.0672857	0.48293	0.247162	3.14407	1.39853	7.54931	2.01001	24.522	5.28364	96.0608	69.5169	245.001	45.3244	6545.16	0.160395	0.104089	0.83939	1	0.7	45.1646	0.424539	3.97658	40.7635	96.0183	1.54094	0.283741	579.102
681	0.966459	1.9378	0.24838	1.01708	0.381819	0.581292	0.994072	0.298754	3.9722	1.71264	7.71395	2.1157	21.6547	4.909	120.836	103.611	297.3	51.2317	6966.97	0.163871	0.105879	1.94227	1	0.7	48.5038	4.16972	6.22814	38.106	9.13875	1.54773	0.348505	638.048
682	0.00670481	0.141227	0.00144585	0	0.0391977	0.0134095	0.22098	0.126338	1.80052	0.881411	4.74083	1.14161	14.3379	3.06217	102.628	73.2129	258.109	27.3207	6450.43	0.156588	0.123432	2.03534	1	0.7	26.5138	0.149378	2.20044	24.164	161.764	1.26862	0.283651	641.578
683	0.01	0.141821	0.00161371	0.0187885	0.0328012	0.022448	0.347266	0.148309	2.12502	1.02859	5.5234	1.42902	16.3743	3.74487	111.441	79.0456	272.224	32.0873	6432.93	0.162253	0.130463	1.39977	1	0.7	30.9482	0.172224	2.67585	28.1001	163.161	1.24367	0.29037	614.089
684	0.01	0.0937227	0.01	0	0.0121928	0.0076401	0.0876701	0.0659986	1.16933	0.562178	2.72019	0.809582	9.58677	2.18208	95.3498	55.6898	236.75	16.7958	6581.11	0.105172	0.0976188	1.29852	1	0.7	17.3174	0.113723	1.34283	15.8608	139.469	1.07737	0.235226	608.773
685	0.117357	1.03258	0.174221	0.62267	0.151843	1.40441	0.606508	0.199276	2.62983	1.07377	5.82522	1.54739	19.0381	3.92839	99.6994	64.3565	242.398	35.3778	6030.69	0.165962	0.12472	3.3754	1	0.7	38.3515	1.94683	4.99186	31.4129	16.1354	1.33067	0.2655	681.547
686	0.0999526	0.260132	0.0159681	0.101831	0.0514727	0.196006	0.567357	0.183339	2.74816	1.25099	6.52477	1.73328	20.4926	4.70048	109.102	80.6748	265.396	39.6574	6225.6	0.168448	0.120643	1.98208	1	0.7	38.9263	0.477884	3.74634	34.7021	72.6162	1.39625	0.303979	639.575
687	0.0317962	0.675599	0.0274119	0.0798084	0.0371002	0.0381222	0.384875	0.158359	2.54353	1.07653	5.80488	1.62925	18.3586	4.61537	92.8347	54.0107	213.044	35.1148	5873.48	0.167126	0.089456	1.12938	1	0.7	35.4613	0.814615	3.16199	31.4847	38.6498	1.86825	0.253519	599.061
688	0.19406	1.20668	0.182383	1.02021	0.599232	0.962689	1.32259	0.215951	2.0522	0.675407	3.17552	0.847016	9.09668	2.01199	94.2741	54.1491	226.517	23.0566	6089.34	0.107021	0.10147	1.62507	1	0.7	23.5626	2.60333	5.15266	15.8066	6.07169	1.05471	0.239051	624.848
689	0.027341	0.198501	0.0161248	0.0625068	0.0311762	0.126749	0.375121	0.160587	2.48626	1.12987	6.65266	1.77701	20.4527	4.88492	98.1469	59.2828	233.507	38.2588	6454.52	0.143571	0.0897286	1.7389	1	0.7	38.3815	0.304473	3.17989	34.8971	114.615	1.60005	0.25388	629.814
691	0.01	0.207182	0.0273485	0.158942	0.01	0.0253639	0.360294	0.229204	2.97406	1.33403	6.61046	1.71014	19.2875	4.24039	115.075	79.5522	263.463	41.3329	6857.68	0.149048	0.119514	1.72979	1	0.7	37.1849	0.403473	3.59892	33.1825	82.2423	1.24711	0.301948	629.427
692	0.307524	0.853922	0.150901	0.313797	0.225757	0.321169	0.433796	0.183733	2.52521	1.2155	6.07637	1.65381	19.5738	4.75654	102.5	67.8127	236.9	37.7042	5470.09	0.12032	0.0993717	0.579375	1	0.7	38.5919	1.62614	3.68967	33.2761	20.4632	1.2108	0.28625	555.416
693	0.01	0.120701	0.01	0.0337526	0.05899	0.0538937	0.187936	0.119822	1.58433	0.73271	4.64194	1.21488	14.7636	3.5869	106.713	80.4361	274.555	26.5647	5830.05	0.190112	0.161319	0.175394	1	0.7	27.1195	0.174453	2.00497	24.94	142.961	1.17848	0.292969	487.296
694	0.01	0.149959	0.00325407	0.0283472	0.0660764	0.0228702	0.421053	0.111561	2.43919	1.0312	5.72201	1.39736	17.4852	4.08615	114.896	82.5629	264.181	34.0835	5988.09	0.0868813	0.108472	1.75989	1	0.7	32.9743	0.19156	3.06075	29.722	155.158	0.800954	0.312525	630.701
695	0.0483915	0.450644	0.0700067	0.43042	0.188446	0.173735	0.643125	0.230117	3.10677	1.35862	7.55721	1.97441	22.8614	5.24501	91.6815	56.045	220.12	44.8248	6846.45	0.151355	0.0803456	1.26053	1	0.7	44.3383	0.999463	4.34219	38.9966	39.0176	1.8838	0.254612	606.689
696	0.00327526	0.0847906	0.0021119	0.0489754	0.0500471	0.0215555	0.417823	0.18181	2.68935	1.38278	7.32415	1.98385	24.2685	5.8964	95.3272	57.9348	240.582	43.4855	5957.16	0.114821	0.0685235	0.851761	1	0.7	44.3554	0.139153	3.36059	40.8556	293.602	1.67564	0.240811	580.065
697	0.0250177	0.317595	0.013055	0.1157	0.130001	0.193837	0.585759	0.265278	3.16613	1.43504	7.7706	1.96146	22.2669	5.34914	91.7434	57.32	219.834	46.5826	7048.68	0.136267	0.0997744	1.39148	1	0.7	43.5955	0.471368	4.34101	38.7832	82.2779	1.36575	0.260742	613.666
698	0.00485762	0.120396	0.00417444	0.0302298	0.0706702	0.0348655	0.360508	0.16398	2.31855	1.12319	6.07153	1.58882	17.9921	4.35874	96.5184	65.7327	219.969	34.6114	5596.13	0.151434	0.057233	1.20796	1	0.7	34.2426	0.159658	2.94858	31.1344	195.006	2.64592	0.298827	603.715
699	0.116321	0.972801	0.147915	0.87407	0.182737	0.608463	0.546696	0.129871	2.1695	0.954341	5.13835	1.42895	16.3138	4.12912	98.0319	59.5524	238.442	30.8123	6143.33	0.151969	0.0853044	1.84195	1	0.7	33.713	2.11111	3.63726	27.9646	13.2464	1.78149	0.249757	634.082
700	0.0032405	0.163457	0.0111767	0.055473	0.0432528	0.0326013	0.298829	0.135121	2.03919	0.899303	5.0786	1.40089	16.0526	4.19789	98.7055	53.8328	218.419	30.6871	5652.49	0.149025	0.074671	2.22334	1	0.7	30.4116	0.233347	2.54899	27.6293	118.404	1.99576	0.246466	648.316
701	0.0230967	0.305632	0.0372035	0.292064	0.173785	0.267184	0.469922	0.143263	1.75965	0.798884	4.15173	1.0797	13.1171	3.13294	103.007	66.0316	248.554	26.6901	6014.72	0.134323	0.107511	1.55668	1	0.7	25.7521	0.657996	2.81381	22.2803	33.8608	1.24939	0.265663	621.721
702	0.0227991	0.319788	0.0391737	0.217435	0.0664266	0.0424479	0.305293	0.128262	1.78093	0.755165	3.95886	1.10418	11.5868	2.66043	102.922	70.3903	241.557	24.0581	6219.65	0.194649	0.144224	0.875712	1	0.7	22.988	0.599195	2.32336	20.0655	33.4874	1.34963	0.291403	581.895
703	0.00344391	0.0705594	0.01	0.00642689	0.0301121	0.0144293	0.303266	0.145311	2.21606	1.01522	5.58486	1.48677	17.6111	4.27442	92.8308	59.7744	217.344	33.382	5800.77	0.162986	0.0863956	1.68381	1	0.7	32.7719	0.0904302	2.70918	29.9723	331.441	1.88651	0.275022	627.446
705	0.0606108	0.980994	0.0505951	0.048043	0.01	0.270391	3.07532	0.908372	16.5681	6.91066	37.8203	9.70964	108.949	27.9983	44.6459	14.0531	107.49	232.604	8362.94	0.476869	0.0745264	2.95867	1	0.7	213.36	1.14024	20.8322	191.388	167.848	6.39866	0.130739	670.803
706	2.39473	11.5623	1.15451	8.56696	2.66306	4.84045	6.53103	2.15162	23.5103	9.79533	45.0511	10.4508	108.039	27.3424	49.3332	56.376	115.168	300.316	9319.73	0.496654	0.0530195	3.79115	1	0.7	264.053	23.6785	39.6965	200.678	8.47514	9.36739	0.489511	691.223
707	0.125733	1.13941	0.0642214	0.0974563	0.196305	0.133322	1.40902	0.645451	8.26367	4.37407	25.0714	6.49907	82.6177	22.3353	65.3877	48.2049	157.699	147.792	8681.92	0.477349	0.101648	2.21032	1	0.7	152.972	1.42682	10.6478	140.897	98.7493	4.69609	0.305676	647.865
708	0.01	0.298798	0.01	0	0.218288	0.113862	2.13116	0.703031	12.0337	5.56335	32.7152	8.41334	101.957	29.2283	28.518	3.67277	65.6399	188.651	8627.22	0.319514	0.0776259	8.65695	1	0.7	193.396	0.318798	15.2	177.877	557.962	4.11607	0.0559533	766.096
709	0.126477	0.663195	0.0803086	0.697153	0.25968	0.193069	1.43317	0.655444	11.5031	5.02387	29.8075	8.33916	92.7304	25.7932	34.0554	6.98075	82.3811	172.37	8590.74	0.353206	0.111952	3.46293	1	0.7	177.306	1.56713	14.0444	161.694	103.178	3.15497	0.0847373	683.663
711	0.180518	1.24087	0.0839369	0.725732	0.201711	0.540736	4.99964	1.63161	19.425	7.92858	39.8775	10.6333	118.974	31.9627	69.2459	39.109	175.905	275.336	9294.59	0.39483	0.0616615	5.2372	1	0.7	238.406	2.23106	26.7987	209.376	93.846	6.40318	0.22233	719.201
712	1.16942	1.73458	0.243453	0.577795	0.273274	0.145468	1.07291	0.768466	10.7052	4.96947	29.9237	7.50952	91.6072	23.4025	64.4571	28.731	158.886	175.251	9077.97	0.498891	0.0778127	6.85904	1	0.7	174.103	3.72525	12.9653	157.412	42.2555	6.41144	0.180828	743.835
713	0.01	0.670972	0.0109031	0	0.0701327	0.0702333	0.815377	0.381478	5.29467	2.61876	15.263	4.2149	50.9504	13.5546	68.3591	20.9721	169.713	89.4092	8656.41	0.439944	0.176745	0.307089	1	0.7	93.9255	0.691875	6.63189	86.6017	125.17	2.48914	0.123574	517.776
714	0.01	0.727684	0.01	0.0979814	0.044409	0.0534032	1.01335	0.486481	7.20468	3.48656	22.8943	5.82504	66.0045	18.335	54.806	21.549	127.331	123.088	8959.01	0.309282	0.0891283	2.83547	1	0.7	126.193	0.845666	8.80232	116.545	137.815	3.47008	0.169236	667.386
715	0.243462	0.702013	0.0316704	0.297167	0.135389	0.12693	1.71052	0.595791	9.94658	4.86796	28.6427	7.29865	83.4599	23.0563	39.4594	12.3843	98.8095	164.763	8489.26	0.281865	0.0857466	4.3708	1	0.7	161.115	1.27431	12.5152	147.325	115.612	3.28719	0.125335	703.346
716	0.01	0.889591	0.01	0.0275976	0.598135	0.219396	2.56671	1.18495	17.1946	7.56954	42.2439	10.6128	119.895	30.5099	59.4292	17.2864	146.235	249.591	8740.2	0.401214	0.134284	0.909329	1	0.7	233.532	0.937188	21.7638	210.831	224.961	2.98779	0.11821	584.395
717	0.01	0.718048	0.01	0.121677	0.49608	0.260715	3.77763	1.38475	19.0538	8.49448	44.7431	11.2145	127.016	31.8236	44.2668	10.5553	111.288	273.692	8854.37	0.267575	0.162518	2.55641	1	0.7	249.124	0.859725	24.973	223.291	259.724	1.64643	0.0948468	659.166
718	0.187423	0.966085	0.0130282	0.110981	0.01	0.190223	2.26115	0.943354	15.2972	6.74559	34.9327	9.64204	107.168	27.4705	58.673	28.378	151.897	217.947	9218.29	0.388827	0.168035	3.143	1	0.7	205.938	1.27752	18.7019	185.958	145.562	2.31396	0.186824	675.7
719	0.0657864	0.81219	0.0207258	0.302044	0.159261	0.355987	1.64404	0.722642	10.109	5.26854	29.074	7.97312	96.6939	25.2736	28.9501	7.67722	74.9005	176.574	9164.11	0.318983	0.0704645	1.82359	1	0.7	178.475	1.20075	12.9909	164.283	136.817	4.52686	0.102499	633.336
720	0.0049304	0.635037	0.00611049	0.175739	0.0986311	0.104971	1.51149	0.671389	9.80125	4.82001	27.5779	7.23613	86.8839	22.2247	39.857	12.0943	103.956	165.464	8974.04	0.379209	0.0808372	3.78856	1	0.7	161.752	0.821816	12.1877	148.743	180.993	4.69102	0.116341	691.165
721	0.177274	1.6528	0.128465	0.36869	0.318798	0.212198	1.8861	0.75727	11.4607	6.29321	33.449	8.8826	101.535	26.2072	71.5152	27.275	181.643	195.198	8878.58	0.489039	0.167122	0.146583	1	0.7	193.329	2.32723	14.6351	176.367	75.7839	2.92623	0.150157	478.022
723	0.01	0.637999	0.01	0	0.134942	0.0810543	1.03475	0.379425	7.1231	3.74018	19.7347	5.58488	68.1214	17.8953	38.9301	9.32638	99.6387	122.592	9203.66	0.321193	0.0888321	3.67717	1	0.7	124.488	0.657999	8.75326	115.077	174.889	3.61573	0.093602	688.661
724	0.0349363	0.332478	0.01	0.0348835	0.138149	0.0576179	1.44594	0.607803	8.55419	4.07648	22.5611	5.97025	65.3158	16.6909	43.8314	30.6763	97.9696	137.102	9918.89	0.426799	0.1451	2.59964	1	0.7	125.83	0.412297	10.8037	114.614	277.99	2.94141	0.31312	660.487
725	0.01	0.816172	0.00295958	0.0506969	0.32622	0.142051	1.66897	0.917473	14.8076	7.64287	43.7701	12.2932	145.206	34.9435	49.9953	42.3563	110.153	254.769	9997.8	0.4787	0.155592	2.14627	1	0.7	262.598	0.879828	17.8623	243.856	277.163	3.07664	0.384521	645.613
726	0.01	0.369285	0.00385257	0.11001	0.0499326	0.0924792	1.08621	0.392099	5.79902	2.60051	13.5774	3.82543	41.0472	10.3939	38.2105	28.2696	86.6625	86.6678	10184	0.46938	0.219495	5.27301	1	0.7	79.3573	0.493148	7.41974	71.4444	144.874	2.13846	0.326204	719.808
727	0.01	0.348858	0.00273922	0.0782328	0.141937	0.150333	1.62669	0.604387	8.82252	4.23599	22.3028	5.99896	65.2255	16.7141	48.7269	54.0762	108.212	136.977	8571.53	0.370028	0.122894	0.462587	1	0.7	126.263	0.43983	11.3459	114.477	260.276	3.01096	0.499723	541.665
729	0.0127693	0.378871	0.0059493	0.0509929	0.0962338	0.0714596	1.10616	0.421206	6.84596	3.34826	17.6977	4.34748	50.5408	12.7353	56.9016	48.0767	131.204	106.102	8028.29	0.313135	0.152257	3.17953	1	0.7	97.6592	0.448582	8.54102	88.6696	197.666	2.05662	0.366428	676.643
730	0.348611	4.09272	0.107803	0.342605	0.206017	0.466594	1.46027	0.635377	9.95068	4.61568	25.9327	6.54832	74.1779	19.3021	51.1115	49.049	122.984	155.184	10450.5	0.305424	0.201876	2.77667	1	0.7	148.187	4.89174	12.7189	130.577	26.6933	1.51293	0.398823	665.712
731	0.0381173	0.530372	0.0145255	0.18007	0.234095	0.0873917	1.48047	0.472016	6.70262	2.85609	14.6806	3.33289	38.1117	9.00838	59.372	35.3525	146.343	96.9336	9338.58	0.323603	0.16859	3.06866	1	0.7	77.7294	0.763085	8.97658	67.9897	89.0984	1.91946	0.241573	673.754
732	0.0675199	0.560082	0.01	0.198119	0.557647	0.109131	2.0063	0.6191	7.72661	3.77041	20.498	5.23937	57.3408	14.7126	48.1844	44.02	119.332	127.318	9474.28	0.255687	0.194633	3.16192	1	0.7	113.416	0.835721	11.0188	101.561	121.525	1.31369	0.368887	676.19
733	0.01	0.342365	0.01	0.0180057	0.147269	0.0703389	1.24433	0.545176	7.85438	3.46826	19.9186	5.18026	56.5304	14.2961	46.5364	43.9004	108.93	116.558	9254.26	0.321621	0.12925	4.29467	1	0.7	109.636	0.38037	9.86149	99.3937	261.308	2.48836	0.403015	701.832
734	0.01	0.887767	0.00313417	0.0538376	0.201614	0.188757	2.96823	1.09992	17.3888	8.07044	42.5479	10.7487	122.891	28.7043	48.1451	44.7411	114.634	253.067	9865.51	0.290946	0.110436	0.643796	1	0.7	235.764	0.954739	21.8473	212.962	223.058	2.63451	0.390296	562.018
735	0.01	0.299664	0.01	0.0272746	0.183587	0.172151	1.5125	0.465787	7.2194	3.71142	18.8261	5.01685	53.6493	13.4687	38.7581	30.6282	90.392	115.051	9437.66	0.277272	0.171399	3.57436	1	0.7	104.573	0.346938	9.55342	94.6724	272.88	1.6177	0.338838	686.294
738	0.01	0.382785	0.01	0.0283208	0.158778	0.0594548	0.974757	0.461533	7.17546	3.42161	19.0063	4.48857	53.5884	13.4027	36.8511	31.236	83.4708	107.043	9899.91	0.256049	0.0976253	2.67021	1	0.7	103.169	0.431106	8.82999	93.9076	217.829	2.62277	0.374215	662.604
739	0.0377829	0.582249	0.0264426	0.242022	0.0678459	0.0634902	0.946194	0.5441	6.03789	2.89726	16.1821	4.12258	48.209	12.4775	44.9088	37.3072	104.683	100.431	9203.54	0.447393	0.131519	4.45904	1	0.7	92.4365	0.888497	7.65952	83.8885	94.4161	3.40173	0.356381	705.073
740	0.0106086	0.364999	0.0148528	0.0637116	0.166701	0.0827456	0.885256	0.399734	5.55267	2.50403	12.4275	3.22503	36.8128	9.07153	54.0339	40.9125	130.722	81.0254	9877.16	0.284871	0.152005	5.1876	1	0.7	71.5822	0.454172	7.08711	64.0409	141.006	1.87409	0.312973	718.354
741	0.01	0.522115	0.00316174	0.108479	0.243293	0.200429	1.92098	0.467927	4.72614	1.64127	6.84167	1.53981	14.7296	3.30906	46.383	36.7299	111.538	51.8668	11730.4	0.385896	0.115495	3.09745	1	0.7	36.264	0.643756	7.55877	28.0614	43.5902	3.34123	0.329304	674.513
742	0.01	0.305602	0.01	0.0162582	0.145858	0.0192288	0.778711	0.429693	5.83137	2.91188	16.1371	4.33231	46.903	12.1304	44.0918	36.1327	103.929	95.172	9456.2	0.289063	0.153649	1.85273	1	0.7	89.9614	0.341861	7.20486	82.4147	241.077	1.88132	0.347665	634.517
743	0.00408846	0.950558	0.0200705	0.311168	0.477585	0.235077	2.65461	1.03816	14.0088	5.63262	28.2665	6.55906	70.2533	15.3101	53.5317	52.1554	125.184	182.74	8470.5	0.326364	0.181604	4.00668	1	0.7	145.722	1.28588	18.4142	126.022	98.0038	1.79712	0.416631	695.898
744	0.01	0.332176	0.0153644	0	0.0984006	0.111423	0.842452	0.391836	6.41803	3.12249	16.7419	4.34417	50.6311	12.76	41.804	35.9864	98.0097	100.373	9508	0.233308	0.173175	2.64192	1	0.7	95.8194	0.35754	7.86214	87.5997	245.006	1.34724	0.367171	661.761
745	0.496112	0.376176	0.134388	0.488207	0.312927	0.312542	1.41132	0.553976	8.01375	3.78313	21.2542	6.03728	72.1488	18.0194	54.6065	37.5675	127.662	122.137	9371.57	0.294751	0.124303	8.32862	1	0.7	133.342	1.49488	10.6045	121.243	81.1052	2.37124	0.294274	762.331
746	0.0206627	2.6648	0.0072172	0.299228	1.13866	1.13575	11.1844	4.80802	60.0613	23.5571	102.724	22.7922	220.557	44.1518	48.1941	72.2641	105.567	713.894	9106.95	0.527895	0.132289	10.8073	1	0.7	495.103	2.99191	78.3281	413.783	138.301	3.99047	0.684536	788.238
747	0.02	5.86	0.05	0.62	1.44	0.39	8.85	3.45	56.1	28.3	181	57.7	787	174	138	119	3154	838	23110	175	244	18.9	1	1	1304.78	6.55	70.23	1228	187.481	0.717213	0.0377299	809.263
748	0.01	3.19	0.05	0.05	0.22	0.1	2.41	1.64	30.5	16.2	94.4	25.6	291	56.8	19.3	34.6	531	534	13976	44.3	20.9	0.63	1	1	522.17	3.3	34.87	484	146.667	2.11962	0.0651601	538.805
749	0.06	0.86	0	0	0.4	0	1.05	1.1	25.3	15	95	27.5	318	66.2	12.6	4.13	348	519	12252	39.1	10.9	3.17	1	1	550.47	0.92	27.85	521.7	567.065	3.58716	0.0118678	648.166
750	0.08	6.45	0.03	0.66	0.78	0.06	4.74	2.67	43	22.2	137	40.5	518	113	108	24.5	2861	547	17987	217	207	1.36	1	1	889.17	7.22	51.25	830.7	115.055	1.04831	0.00856344	587.457
751	0.1	2.4	0.13	0.96	1.03	0.1	2.14	1.77	36.6	20.3	126	35.9	437	89.5	23.6	10.3	621	694	14307	59.6	27.5	1.21	1	1	753.93	3.59	41.64	708.7	197.409	2.16727	0.0165862	579.696
752	3.81	6.36	3.62	24.6	21.6	1.23	56.4	16.3	165	58.9	282	67.6	707	130	38.8	28.1	1034	1903	14916	132	65.5	3.53	1	1	1544.42	38.39	260.53	1245.5	32.4433	2.01527	0.027176	656.501
753	0.25	2.57	0.16	0.8	0.4	0.02	4.78	3.06	60.5	33.8	199	54.1	591	106	30.9	9.77	859	1104	14280	111	47.5	2.28	1	1	1056.44	3.78	68.76	983.9	260.291	2.33684	0.0113737	623.533
754	0.34	5.73	0.14	0.97	0.7	0.04	4.18	2.06	34.4	18.4	118	38.6	521	123	110	53.2	2358	560	17313	127	118	16	1	1	867.56	7.18	41.38	819	114.067	1.07627	0.0225615	791.888
755	0.51	6.1	0.15	1.76	0.85	0.04	5.8	2.74	46.3	24.8	170	55.4	769	183	125	70.7	2862	828	21848	128	165	13.4	1	1	1266.45	8.52	55.73	1202.2	141.103	0.775758	0.024703	773.994
756	0.2	6.53	0.08	0.88	0.69	0.01	4.11	2.55	44.1	22.6	137	40.8	528	117	117	46.1	2972	654	16711	198	159	3.24	1	1	904.55	7.69	51.46	845.4	109.935	1.24528	0.0155114	649.846
757	5	75.4	4.72	33.7	32.6	1.38	116	36.7	401	140	581	119	1075	175	132	498	890	4145	11418	41.1	10.1	6.07	1	1	2796.5	118.82	587.68	2090	17.5896	4.06931	0.559551	700.913
758	2.45	16.2	1.61	7.81	5.78	0.47	12.7	4.98	63.6	26.9	154	46.5	589	130	110	91.1	2555	777	16734	194	187	12	1	1	1062	28.07	87.53	946.4	33.7157	1.03743	0.0356556	763.16
759	0.67	6.17	0.5	3.44	3.55	0.28	10.9	4.02	50.1	21.6	118	31.5	367	77.2	45.7	47.1	938	654	13669	80.9	61.4	0.46	1	1	694.93	10.78	68.85	615.3	57.0779	1.31759	0.0502132	520.469
760	0	3.87	0.03	0.69	0	0.16	4.87	3.04	59.2	30.1	170	45	487	89.6	36.9	23.7	1038	962	15730	88.9	43.7	4.85	1	1	893.56	4.59	67.27	821.7	179.02	2.03432	0.0228324	682.025
761	0.02	5.86	0.05	0.62	9.26	0.076	54.1	21.8	303	125	580	126	1159	195	120	457	819	3664	11346	24.1	6.62	11.5	1	1	2579.79	6.55	388.236	2185	333.588	3.64048	0.557998	759.041
762	0	1.9	0	0.22	0	0	2.11	1.29	25.3	13.4	91.8	29.1	392	98	95.4	22.5	2514	506	17500	149	93	3.34	1	1	655.12	2.12	28.7	624.3	294.481	1.60215	0.00894988	652.195
763	0.3	5.5	0.21	1.27	1.47	0.31	3.4	2.11	34	18	111	33.6	436	95.7	68.9	34.5	1660	568	15758	98.3	68	8.04	1	1	742.87	7.28	41.29	694.3	95.3709	1.44559	0.0207831	725.655
764	0.39	6.87	0.09	0.75	1.17	0.15	4.89	2.17	38.5	20.6	126	40.2	520	117	107	50.8	2720	567	19247	177	160	10.3	1	1	878.78	8.1	46.88	823.8	101.704	1.10625	0.0186765	748.526
765	0.01	38.9	0.06	3.14	8.02	0.2	52.9	21	266	103	468	100	944	157	89.3	285	937	2934	9881	61.2	13.8	11.1	1	1	2162.23	42.11	348.12	1772	42.0803	4.43478	0.304162	755.64
766	0	1.45	0.11	0.46	0.23	0	2.79	1.23	28.3	15.8	101	28.2	340	72.5	18	6.51	424	548	11771	41.2	11.6	1.06	1	1	592.07	2.02	32.55	557.5	275.99	3.55172	0.0153538	571.074
767	0	17.5	0.11	1.35	4.26	0.45	19.3	6.33	75	28.9	128	25.9	241	50.5	8.72	37	60.6	802	8418	2.9	0.83	5.83	1	1	598.6	18.96	105.34	474.3	25.0158	3.49398	0.610561	697.462
768	0.01	81.5	0.18	4.2	13.7	2.4	96.7	35.1	426	156	652	119	964	169	58.9	287	419	4257	6161	26.9	3.97	9.23	1	1	2719.79	85.89	573.9	2060	23.9842	6.77582	0.684964	738.271
769	0.03	6.48	0.03	0.07	1.08	0.12	7.72	3.26	46.1	19.5	100	23.8	249	55.4	22.87	21.4	314	588	13882	9.11	7.03	4.43	1	1	512.59	6.61	58.28	447.7	67.7307	1.29587	0.0681529	674.606
770	0	0.19	0	0	0	0	0.6	0.43	12.8	8.88	61.4	17.8	199	44.9	3.179	0.43	83.6	335	15467	6.49	5.01	0.9	1	1	346	0.19	13.83	331.98	1747.26	1.29541	0.00514354	560.653
771	0	34.5	0.16	4.02	11	1.31	72.6	24.6	290	108	447	85	694	129	25.67	115	166	2879	6404	6.96	1.51	1.74	1	1	1901.19	38.68	399.51	1463	37.8232	4.60927	0.692771	604.291
772	0.02	24.4	0.05	2.6	4	0.56	26.5	9.24	113	44.6	202	41.2	382	77	16.95	64.8	126	1245	10644	5.5	1.54	3.08	1	1	927.17	27.07	153.3	746.8	27.5877	3.57143	0.514286	645.959
773	0	20.1	0.19	3.64	8.14	0.36	46.8	15.5	184	68.8	300	60.4	535	101	59.3	155	198	1945	13107	4.32	1.95	5.82	1	1	1343.93	23.93	254.8	1065.2	44.5132	2.21538	0.782828	697.316
774	0	0.48	0.04	0.2	0.01	0.02	0.79	0.72	13.4	7.91	48	12.9	153	36.8	14.497	2.06	411	293	16758	5.96	4.09	2.21	1	1	274.27	0.72	14.94	258.61	359.181	1.45721	0.00501217	621.27
775	0	0.25	0.01	0	0	0.11	0.11	0.21	6.52	4.47	31.9	9.53	120	29.4	6.92	1.44	185	174	17024	5.06	3.15	6.4	1	1	202.51	0.26	6.95	195.3	751.154	1.60635	0.00778378	705.479
776	0	26.2	0.16	2.71	8.8	1.66	60.6	21.7	269	99.7	424	79.5	667	122	33.9	106	317	2580	10867	9.94	3.15	3.32	1	1	1783.03	29.07	361.76	1392.2	47.8913	3.15556	0.334385	651.73
777	0.02	5.86	0.05	0.62	1.44	0.39	8.85	3.45	79	30.2	162	43.7	547	145	33.9	106	317	940	21610	27.2	92.3	9.99	1	1	1027.58	6.55	93.13	927.9	141.664	0.294691	0.334385	745.648
778	0.14	1.88	0.02	0.08	0.26	0.07	2.16	1.73	36.7	19.1	102	22.8	220	46	33.9	106	317	668	17870	29.9	19.3	4.36	1	1	452.94	2.12	40.92	409.9	193.349	1.54922	0.334385	673.313
779	0.02	5.86	0.05	0.62	20.5	3.17	120	40.9	472	171	696	129	1053	190	33.9	106	317	4627	6993	20.9	3.88	9.74	1	1	2902.12	6.55	656.57	2239	341.832	5.3866	0.334385	743.273
780	0	7.65	0.13	1.98	4.52	0.47	24.4	8.73	107	42.2	187	38.1	349	71.3	33.9	106	317	1153	11879	4.76	2.45	4.04	1	1	842.48	9.76	145.12	687.6	70.4508	1.94286	0.334385	667.175
781	0.08	4.57	0	0.39	0.54	0.33	6.47	4.35	79.5	42.8	259	70.5	822	208	33.9	106	317	1507	16659	29.9	20	3.6	1	1	1498.53	5.04	91.19	1402.3	278.234	1.495	0.334385	658.039
782	0	4.48	0	0.1	0.84	0.11	2.22	1.2	20.8	10.3	61.5	15.9	180	44.9	33.9	106	317	373	15162	7.84	4.04	0.8	1	1	342.35	4.58	25.17	312.6	68.2533	1.94059	0.334385	553.309
783	0.06	23	0.05	2.46	6.4	0.41	35.7	10.9	134	51.2	222	44.1	394	78.5	33.9	106	317	1401	8175	5.71	1.15	4.55	1	1	1002.78	25.57	187.41	789.8	30.8878	4.96522	0.334385	676.783
784	0.02	5.86	0.05	0.62	1.44	0.39	8.85	3.45	308	117	527	110	1002	193	33.9	106	317	3503	11040	38.8	8.34	14	1	1	2277.68	6.55	322.13	1949	297.557	4.65228	0.334385	778.358
785	0.02	5.86	0.05	0.62	1.44	0.39	8.85	3.45	40.8	16.7	123	46.3	712	221	33.9	106	317	670	32569	85.5	180	21.6	1	1	1180.48	6.55	54.93	1119	170.84	0.475	0.334385	823.605
786	0.02	5.86	0.05	0.62	26.4	5.53	39.4	13.9	139	49.1	298	99.6	1375	361	33.9	106	317	1588	33510	75.4	173	28.5	1	1	2413.48	6.55	224.23	2182.7	333.237	0.435838	0.334385	854.628
787	0.02	0.24	0	0.11	0	0.11	0.53	0.26	7.4	4.76	35.6	11.3	151	41.7	33.9	106	317	189	18313	5.06	3.4	1.9	1	1	253.03	0.37	8.3	244.36	660.432	1.48824	0.334385	610.462
788	0	21.4	0.58	8.46	15.2	1.77	87.6	27.6	312	116	487	94.7	821	159	33.9	106	317	3220	8290	4.76	1.19	1.32	1	1	2152.31	30.44	444.17	1677.7	55.115	4	0.334385	585.461
789	0.65	15.6	0.62	8.05	13.1	1.9	66.5	21	241	88.4	370	71.5	630	123	33.9	106	317	2464	8854	2.6	0.75	2.58	1	1	1651.32	24.92	343.5	1282.9	51.4807	3.46667	0.334385	632.616
790	0.11	11.1	0.04	0.85	1.66	0.2	9.51	3.75	48.3	21	102	23.2	230	47.4	26.4	91.3	255	631	12508	4.28	1.97	6.07	1	1	499.12	12.1	63.42	423.6	35.0083	2.17259	0.358039	700.913
791	0	16.7	0.16	2.62	5.28	0.72	27.7	9.55	116	44.9	198	40.2	356	71.1	17.3	85.3	117	1286	8869	3.77	1.05	1.96	1	1	888.93	19.48	159.25	710.2	36.4579	3.59048	0.72906	612.664
792	0.02	5.86	0.05	0.62	1.44	0.39	8.85	3.45	158	59.1	250	49.7	432	86.1	16.2	73.7	110	1669	8690	2.68	0.82	9.44	1	1	1055.58	6.55	172.13	876.9	133.878	3.26829	0.67	740.358
793	0.18	13.2	0.34	5.86	10.8	1.66	57.3	18.3	212	79.7	337	65.5	586	115	15.4	81.3	117	2235	8665	3.06	0.72	4.07	1	1	1502.84	19.58	300.06	1183.2	60.429	4.25	0.694872	667.767
794	0.02	41.4	0.34	5	10.1	1.15	58.6	19.4	236	91.5	411	84.2	775	153	44.5	321	314	2665	10616	4.83	1.59	4.74	1	1	1886.71	46.76	325.25	1514.7	32.3931	3.03774	1.02229	680.135
795	0	2.63	0	0	0.78	0.24	3.04	1.85	27.4	12.7	65.8	16.1	173	39.6	7.42	11.7	171	419	12308	2.8	1.12	1.86	1	1	343.14	2.63	33.31	307.2	116.806	2.5	0.0684211	608.962
796	0.07	21	0.11	2.03	4.05	0.77	25.3	9.34	115	47.4	216	46	438	89.7	20.2	86.1	135	1345	11716	2.65	0.91	0.73	1	1	1014.77	23.21	154.46	837.1	36.0664	2.91209	0.637778	547.689
797	0.03	1.95	0.08	0.24	0.05	0.18	2.9	1.26	21.9	10.1	55.5	13.6	141	30.9	12.5	52.41	334	349	12592	6.32	3.22	3.6	1	1	279.69	2.3	26.29	251.1	109.174	1.96273	0.156916	658.039
798	0.06	14	0.46	8.55	12.2	2.05	64.5	20	230	86.5	365	71.8	618	121	18.9	95.6	118	2419	8369	2.25	0.86	1.07	1	1	1614.12	23.07	328.75	1262.3	54.7161	2.61628	0.810169	571.68
799	0	27.4	0.03	1.09	3.8	0.44	27.6	10.5	132	51.3	225	45.7	410	80.6	45	99.8	409	1440	10383	6.52	2	7.56	1	1	1015.46	28.52	174.34	812.6	28.4923	3.26	0.24401	720.129
800	0.54	12.4	0.66	7.45	11	2.02	54.9	17.9	207	77.2	331	64.8	571	115	24.6	80.7	177	2188	8637	2.48	0.75	1.92	1	1	1472.87	21.05	292.82	1159	55.0594	3.30667	0.455932	611.203
801	0	1.27	0.02	0.07	0.3	0.16	3.14	1.84	31.6	16.1	88.6	21.5	230	51.7	7.82	4.31	229	549	12567	9.72	3.77	1.6	1	1	446.3	1.36	37.04	407.9	299.926	2.57825	0.018821	598.487
802	0.14	12.3	0.14	3	5.29	0.93	30.9	9.76	118	44.8	199	40.3	369	74.8	18	79.6	204	1291	9495	3.74	1.13	5.95	1	1	908.36	15.58	164.88	727.9	46.7202	3.30973	0.390196	699.202
803	0.08	20.7	0.11	1.17	0.74	0.29	6.12	2.44	37.9	17.9	98.2	25	267	58.6	41.4	93.7	403	589	15193	6.23	3.67	3.99	1	1	536.25	22.06	47.49	466.7	21.1559	1.69755	0.232506	666.18
804	0.03	12.5	0.09	1.52	3.61	0.57	21.5	6.97	82.9	32.6	146	30.3	274	54.7	12	52.1	81.5	933	9023	2.73	0.88	5.23	1	1	667.29	14.14	115.55	537.6	38.0198	3.10227	0.639264	688.292
805	0.98	73.3	0.42	3.46	5.43	0.75	31.2	12.4	174	68.7	320	70.4	656	114	47.4	290	297	2001	11414	11.5	3.21	4.69	1	0.5	1531.04	78.16	223.78	1229.1	15.7254	3.58255	0.976431	739.765
806	0.35	58.1	0.06	2.05	4.45	0.5	35.5	14.8	189	78	373	83.3	789	144	57.5	373	353	2362	11529	6.71	2.19	6.95	1	0.5	1772.11	60.56	244.25	1467.3	24.2289	3.06393	1.05666	777.641
807	0.27	100	0.32	3.73	8.25	1.56	45.5	17.3	221	87.3	409	87.7	813	161	64.2	485	380	2636	10681	11	2.74	8.06	1	0.5	1955.93	104.32	293.61	1558	14.9348	4.0146	1.27632	792.656
808	2.42	61.2	0.82	4.49	2.98	0.45	14.8	6.15	87.8	40.5	221	53.6	558	122	80.7	367	522	1378	12504	13.2	4.35	3.16	1	0.5	1176.21	68.93	112.18	995.1	14.4364	3.03448	0.703065	704.39
809	0.26	33.8	0.13	1.04	1.35	0.42	10.3	4.08	53.4	22.3	114	26.1	253	54	21.3	91.6	140	703	10717	4.16	1.52	3.62	1	0.5	574.18	35.23	69.55	469.4	13.3239	2.73684	0.654286	716.283
810	0.15	46.5	0.12	1.04	2.44	0.3	19.5	9.2	144	66.1	354	89.4	899	178	88.3	486	611	2249	13309	12.5	3.25	5.96	1	0.5	1809.75	47.81	175.44	1586.5	33.1834	3.84615	0.795417	762.51
811	0.01	52.5	0.29	6.08	10.5	2.82	54	15.8	189	68	294	63.2	577	100	13.8	131	81.2	1894	8930	1.33	0.52	4.51	1	0.5	1433.2	58.88	272.12	1102.2	18.7194	2.55769	1.6133	736.145
812	0.02	31.9	0.03	0.54	0.79	0.29	5.78	2.46	36.9	17.5	101	26.5	316	82.4	42.8	215	308	611	11617	4.32	1.46	2.42	1	0.5	622.11	32.49	46.22	543.4	16.7251	2.9589	0.698052	681.854
813	0	81.2	0.08	1.44	3.49	0.64	24.8	10.2	137	58.2	291	64.5	621	127	64.3	433	421	1852	11474	13.5	3.53	2.62	1	0.5	1420.55	82.72	176.13	1161.7	14.0438	3.82436	1.0285	688.452
814	0.03	95.5	0.06	1.54	4.04	0.5	35.5	14.6	207	88.1	436	96.5	925	187	99.1	577	673	2701	11894	23	5.52	3.53	1	0.5	2091.37	97.13	261.64	1732.6	17.8379	4.16667	0.857355	714.058
815	0.01	29.7	0.02	0.57	1.53	0.32	12.5	5.01	65.5	27.8	137	30.7	300	62.1	17.3	86.4	123	823	10047	3.77	1.26	3.21	1	0.5	672.76	30.3	84.86	557.6	18.4026	2.99206	0.702439	705.75
816	0.06	69.8	0.1	0.95	2.83	0.56	20.2	8.2	109	47.3	234	53.3	526	111	65.3	439	456	1473	11367	9.51	3.02	5.4	1	0.5	1183.3	70.91	140.79	971.6	13.7019	3.14901	0.962719	753.022
817	0.1	54.1	0.09	1.22	3.12	0.51	20.8	8.25	119	52.7	272	64.1	636	135	55.9	411	484	1706	10755	8.68	2.27	5.32	1	0.5	1366.99	55.51	151.68	1159.8	20.8935	3.82379	0.849174	751.602
818	0.02	7.71	0.01	0.1	0.31	0.13	4.44	2.12	31.2	15.3	89.3	24.4	302	83.5	110	92.6	3064	551	14322	14.1	10.6	2.1	1	0.5	560.54	7.84	38.2	514.5	65.625	1.33019	0.0302219	670.292
819	0.18	11.9	0.24	1.81	1.82	0.28	9.46	4.14	59	27.9	154	40.2	472	123	118	129	3202	962	12398	25	14.3	4.05	1	0.5	905.93	14.13	74.7	817.1	57.8273	1.74825	0.0402873	726.326
820	0.24	11.9	0.35	2.72	1.98	0.61	8.88	3.77	52.5	24.5	137	38.1	456	107	87.5	104	2577	864	14432	19.5	9.5	5.76	1	0.5	845.55	15.21	67.74	762.6	50.1381	2.05263	0.040357	759.209
821	0.01	8.24	0.01	0.15	0.67	0.28	6.28	2.98	46.3	22.2	127	33.4	397	106	95.3	94.2	2683	774	13123	22.1	11.6	2.3	1	0.5	750.52	8.41	56.51	685.6	81.522	1.90517	0.03511	677.676
822	0.26	9.19	0.19	1.3	0.76	0.24	5.03	2.67	43.4	20.2	113	31.5	384	86.8	93.4	84.4	2778	690	14393	21.9	16.8	5.7	1	0.5	698.54	10.94	52.1	635.5	58.0896	1.30357	0.0303816	758.2
823	0.26	6.88	0.12	0.92	0.88	0.23	4.97	2.86	50.3	25.4	145	41.6	522	125	128	63.8	3773	877	13945	24.8	10.8	3.58	1	0.5	926.42	8.18	59.24	859	105.012	2.2963	0.0169096	715.3
824	0.2	9.52	0.28	2.09	1.17	0.34	6.92	2.67	38.9	18.5	106	29.2	352	94.7	115	80.3	3271	660	14039	12.9	8.64	2.03	1	0.5	662.49	12.09	50	600.4	49.6609	1.49306	0.0245491	667.57
825	0.03	4.08	0.05	0.17	0.53	0.18	3.99	2.21	40.1	21.1	132	38.2	480	117	114	27.5	3399	771	13947	24.1	9.92	8.11	1	0.5	839.64	4.33	47.01	788.3	182.055	2.42944	0.00809061	793.292
826	0.01	3.19	0	0.32	0.12	0.13	3.3	2.01	38.8	20.8	127	37.4	459	110	94.9	22.5	2832	744	14512	20.5	8.93	8.4	1	0.5	802.08	3.52	44.36	754.2	214.261	2.29563	0.00794492	796.919
827	0.09	6.32	0.12	0.58	0.84	0.13	4.08	1.73	26.5	12.7	74.1	19.8	236	64.6	53.4	50	1546	446	13913	14.5	9.61	1.42	1	0.5	447.59	7.11	33.28	407.2	57.2714	1.50884	0.0323415	639.8
828	0.18	7.11	0.28	2.34	1.48	0.18	5.07	1.68	25.4	11.8	68.2	19	235	63	67.5	48.4	1958	425	14728	13.5	11.5	2.21	1	0.5	440.72	9.91	33.81	397	40.0605	1.17391	0.0247191	674.422
829	0.11	11.9	0.09	0.85	0.79	0.32	8.63	3.95	61.9	30.8	180	48.8	583	157	206	160	245	1086	14253	43.3	27.9	3.62	1	0.5	1088.14	12.95	75.59	999.6	77.1892	1.55197	0.653061	716.283
830	0.04	11.4	0.06	0.5	1.14	0.27	9.09	3.96	60.7	29	165	43.9	518	137	152	145	4359	1012	13305	26.9	24.2	3.74	1	0.5	980.06	12	75.16	892.9	74.4083	1.11157	0.0332645	719.18
831	0	10.4	0.01	0.22	0.68	0.21	7.62	4.2	64.5	30.4	174	46.5	538	137	169	158	4768	1061	13611	32.9	27.6	2.01	1	0.5	1013.74	10.63	77.21	925.9	87.1025	1.19203	0.0331376	666.778
832	0	14	0	0.3	1.4	0.29	10.8	5.09	79.4	37.2	206	52.8	610	153	188	204	5428	1269	13419	33.5	28.3	3.36	1	0.5	1170.28	14.3	96.98	1059	74.0559	1.18375	0.0375829	709.725
833	0.16	13.1	0.03	0.21	1.15	0.36	13.4	6.33	98.2	46.3	256	70.1	800	187	166	197	5081	1575	14705	43.9	20.1	1.61	1	0.5	1492.34	13.5	119.44	1359.4	100.696	2.18408	0.0387719	649.369
834	0	14.6	0.01	0.21	0.89	0.22	9.83	4.25	61.9	31.4	190	53.2	681	196	231	385	245	1163	15011	39.7	16.2	2.81	1	0.5	1243.51	14.82	77.09	1151.6	77.7058	2.45062	1.57143	694.345
835	0.08	11.2	0.06	0.32	1.14	0.3	9.69	4.47	68.3	31.6	175	48.7	586	134	147	167	4522	1076	15081	30.8	28	8.57	1	0.5	1070.86	11.66	83.9	975.3	83.6449	1.1	0.0369306	798.999
836	0.02	15.6	0.11	1.23	1.61	0.23	8.32	3.77	58.3	29.3	171	49.6	626	167	209	271	245	1059	15389	24	13.6	6.27	1	0.5	1132.09	16.96	72.23	1042.9	61.4917	1.76471	1.10612	767.455
837	0.21	18.6	0.12	1.01	1.92	0.45	15.7	7.43	113	51.7	280	73.6	831	183	140	215	4306	1725	14631	27.1	16.3	6.23	1	0.5	1577.74	19.94	138.5	1419.3	71.1785	1.66258	0.0499303	766.828
838	0.01	11.3	0.02	0.13	1.02	0.2	8.59	4.06	62.6	29.9	172	46.1	548	143	176	166	5000	1032	13527	28.8	26.4	2.38	1	0.5	1026.93	11.46	76.47	939	81.9372	1.09091	0.0332	680.481
839	0.03	15.4	0.03	0.23	0.95	0.29	9.33	3.57	50.4	24.7	144	39.7	505	150	228	376	245	904	14532	20.1	13.5	1.7	1	0.5	943.63	15.69	64.54	863.4	55.0287	1.48889	1.53469	653.577
840	0.03	12.9	0	0.11	1.36	0.34	15.4	6.74	98.2	45.2	244	65.9	769	175	150	192	4642	1513	14833	29.9	15	2.44	1	0.5	1434.18	13.04	122.04	1299.1	99.6242	1.99333	0.0413615	682.534
841	0.09	14.9	0.1	1.15	1.53	0.47	11.5	4.77	67.5	31.1	176	45.7	572	161	176	316	5161	1139	14779	30.7	19.6	3.32	1	0.5	1087.81	16.24	85.77	985.8	60.702	1.56633	0.0612284	708.68
842	0.24	16.8	0.2	1.22	1.54	0.5	11.2	4.21	66.9	32.4	192	58.5	774	209	266	419	245	1213	17080	26.8	15.3	3.21	1	0.5	1368.71	18.46	84.35	1265.9	68.5753	1.75163	1.7102	705.75
843	0.04	13.1	0.01	0.16	0.83	0.25	12.1	5.54	85.6	41.1	239	66.6	801	186	221	210	245	1446	14397	46.6	28	4.41	1	0.5	1451.33	13.31	104.32	1333.7	100.203	1.66429	0.857143	734.083
844	0	15.1	0.04	0.09	1.45	0.27	13.9	6.35	96	45.4	253	69.7	830	187	206	246	245	1540	14725	43.4	34.9	7.7	1	0.5	1518.3	15.23	117.97	1385.1	90.9455	1.24355	1.00408	787.98
845	0	14.1	0.1	0.82	1.64	0.36	9.78	3.75	55.6	26.1	153	42.7	525	150	179	290	5268	967	14143	20.5	10.5	3.4	1	0.5	982.95	15.02	71.13	896.8	59.7071	1.95238	0.0550494	710.761
846	0.14	11.1	0.15	1.48	1.44	0.11	9.62	3.99	62.2	31.1	176	49.7	615	143	162	140	5091	1087	15212	46.9	30.5	5.18	1	0.5	1105.03	12.87	77.36	1014.8	78.85	1.5377	0.0274995	749.075
847	0.51	64.5	0.21	2.26	3.38	0.57	20.1	8.34	119	52.6	274	63.2	627	129	52.6	262	329	1699	10913	14.2	3.75	6.08	1	0.5	1364.67	67.48	151.39	1145.8	16.9798	3.78667	0.796353	764.449
848	1.16	60.8	0.74	7.74	7.97	2.14	35.7	10.4	119	45.3	193	41.4	385	73.7	9.81	81.8	55.6	1259	7327	1.91	0.57	2.44	1	0.5	984.05	70.44	175.21	738.4	10.4827	3.35088	1.47122	682.534
849	0.01	50.8	0.04	1.06	3.26	0.51	18.7	7.44	102	41.1	201	43.4	407	82.6	35.1	192	215	1240	10748	7.64	2.23	14	1	0.5	958.92	51.91	131.91	775.1	14.9316	3.42601	0.893023	852.595
850	2.29	104	0.9	6.72	7.46	1	40.5	15.3	227	98.7	509	126	1252	233	122	816	811	3214	12645	20.5	4.57	7.45	1	0.5	2623.87	113.91	291.26	2218.7	19.4777	4.48578	1.00617	784.628
851	0.02	24.7	0.03	0.33	1.71	0.45	8.66	3.94	56.4	24	118	28	269	50	13.3	59.7	97.3	712	11411	4.38	1.86	7.41	1	0.5	585.24	25.08	71.16	489	19.4976	2.35484	0.613566	784.083
852	0.07	62.1	0.17	3.41	8.72	2.29	47.6	15.5	179	67	285	62.2	569	97.2	17.7	155	115	1864	9530	2.22	0.88	5.18	1	0.5	1399.26	65.75	253.11	1080.4	16.4319	2.52273	1.34783	749.075
853	1.42	61.9	0.61	5.1	6.03	1.14	35.2	13.4	176	70.8	330	75.4	690	124	42.8	280	302	2103	10777	8.17	2.3	12.1	1	0.5	1591	69.03	231.77	1290.2	18.6904	3.55217	0.927152	836.116
854	0.48	61.6	0.39	5	8.79	2.41	44.3	14.6	171	66.3	295	60.3	565	115	30.9	265	207	1898	8102	6	1.18	7.99	1	0.5	1410.17	67.47	241.1	1101.6	16.3273	5.08475	1.28019	791.76
855	1.48	57	0.6	4.33	3.22	0.8	17.2	7.16	101	42.1	207	51.2	500	90.7	50.8	284	433	1323	12963	11	3.96	3.36	1	0.5	1083.79	63.41	129.38	891	14.0514	2.77778	0.655889	709.725
856	0.05	35	0.01	0.32	1.71	0.2	11.9	5.08	71.9	30.9	161	39.3	400	74.8	30.9	154	270	979	12316	9.09	2.51	7.14	1	0.5	832.17	35.38	90.79	706	19.9548	3.62151	0.57037	780.343
857	0	55.4	0.45	7.36	12.5	3.19	56.9	17.5	199	71.6	299	62.8	575	101	13.3	139	110	1962	8782	1.69	0.58	4.09	1	0.5	1461.7	63.21	289.09	1109.4	17.551	2.91379	1.26364	727.215
858	0.07	54.5	0.02	1.74	5.7	0.85	36.9	14	182	70.9	316	69.9	615	105	32.8	247	330	2011	11495	4.7	1.72	9.37	1	0.5	1472.58	56.33	239.45	1176.8	20.8912	2.73256	0.748485	808.362
859	0.33	36.3	0.28	3.03	4.05	1.1	23.9	7.61	95.5	38.9	175	39.4	378	71.2	9.13	87.3	93.1	1091	8959	2.82	0.85	6.85	1	0.5	874.6	39.94	132.16	702.5	17.5889	3.31765	0.937701	776.196
860	0.13	1.21	0.04	0.22	0.15	0.1	1.49	0.68	11.6	5.44	30.6	8.16	85.4	17.2	17.4	6.59	485	204	14591	2.36	1.12	2.39	1	0.5	162.42	1.6	14.02	146.8	91.75	2.10714	0.0135876	680.826
861	0	2.16	0	0.08	0.19	0.19	2.44	1.39	21.7	9.48	49.2	11.2	115	24.9	27	9.54	726	344	14340	2.73	1.06	0.89	1	0.5	237.93	2.24	25.91	209.78	93.6518	2.57547	0.0131405	605.878
862	0	1.13	0.02	0.05	0	0	1.84	0.87	15.9	7.99	43.6	11.7	127	24.7	23.7	8.13	671	300	15787	3.07	1.34	2.23	1	0.5	234.8	1.2	18.61	214.99	179.158	2.29104	0.0121162	675.155
863	0.01	2.37	0.01	0.03	0.15	0.11	2	1.05	16.1	7.5	41.1	10.4	109	24.7	23.5	11.7	634	273	12468	2.73	0.97	2.92	1	0.5	214.53	2.42	19.41	192.7	79.6281	2.81443	0.0184543	697.608
864	0	1.15	0.01	0.05	0.1	0.07	0.9	0.46	8.04	3.95	22.7	5.27	63.3	13.9	13.6	5.35	369	148	12699	2.08	0.77	1.44	1	0.5	119.9	1.21	9.57	109.12	90.1818	2.7013	0.0144986	640.856
865	0	0.67	0.01	0.16	0.28	0.23	4.44	3.03	43.3	16.4	59.2	10.9	84.5	11.5	16.7	3.06	481	567	14176	2.21	0.8	5.54	1	0.5	234.62	0.84	51.28	182.5	217.262	2.7625	0.00636175	755.467
866	0	0.4	0	0	0.06	0.09	1.5	1	15.3	5.86	24	4.46	35.6	6.02	17.6	1.48	470	218	12695	1.31	0.76	0.64	1	0.5	94.29	0.4	17.95	75.94	189.85	1.72368	0.00314894	583.413
867	0.07	1.68	0	0.34	0.12	0.18	2.04	1.2	18	8.43	44.4	11.6	118	23.3	27.6	10.3	794	301	14954	2.21	1.08	3.25	1	0.5	229.36	2.09	21.54	205.73	98.4354	2.0463	0.0129723	706.824
868	0.01	3.55	0.01	0.04	0.18	0.14	1.67	0.58	9.54	4.18	20.5	4.49	49.9	11.7	21.7	9.11	595	146	13144	2.2	0.95	2.01	1	0.5	106.49	3.61	12.11	90.77	25.144	2.31579	0.0153109	666.778
869	0	0.56	0	0.03	0.13	0.08	1.35	0.7	10.5	4.38	18.5	3.92	35.5	6.65	12.5	2.34	338	166	13575	1.03	0.58	1.12	1	0.5	82.3	0.59	12.76	68.95	116.864	1.77586	0.00692308	622.247
870	0	2.76	0.02	0.08	0.28	0.22	3.13	1.65	24.5	11.5	57.5	14.2	146	28.1	31.9	14.9	913	411	14000	3.06	1.17	1.17	1	0.5	289.94	2.86	29.78	257.3	89.965	2.61538	0.0163198	625.426
871	0.11	2.4	0.05	0.31	0.46	0.22	3.42	1.81	28.7	13.4	73.1	17.2	179	38.2	72.9	14.2	1976	519	14611	5.89	2.43	1.67	1	0.5	358.38	2.87	34.61	320.9	111.812	2.42387	0.00718623	652.195
872	0.1	3.54	0.03	0.33	0.24	0.08	1.78	0.89	18.1	9.44	61.1	17.8	223	63.2	67.3	26.7	1896	355	16502	9.6	9.64	2.17	1	0.5	399.63	4	21.09	374.54	93.635	0.995851	0.0140823	672.941
873	0.18	7.94	0.24	1.38	1.07	0.21	4.57	1.66	25.1	11.9	70.8	20.5	265	78.5	85.4	87.6	2434	435	13701	11	4.45	1.18	1	0.5	489.05	9.74	32.61	446.7	45.8624	2.47191	0.0359901	626.048
874	0.01	0.45	0.032	0.52	0.85	1.9	20.5	4.37	22.3	3.01	7.44	0.85	6.67	1.18	12.2	3.24	275	100	12429	0.18	0.04	2.8	1	1	70.082	1.012	49.92	19.15	18.9229	4.5	0.0117818	638.731
875	0	0.16	0.0009	0	0.39	0.66	13.1	2.54	16.4	2.95	8.1	1.16	8.23	1.46	32.8	1.11	151	94.6	12495	0.11	0.03	0.92	1	1	55.1509	0.1609	33.09	21.9	136.109	3.66667	0.00735099	562.038
876	0.006	0.17	0.019	0.55	0.78	1.23	14.3	3.93	20.7	3.91	9.04	1.39	7.54	1.42	32.7	1.39	201	110	12782	0.1	0.02	0.95	1	1	64.985	0.745	40.94	23.3	31.2752	5	0.00691542	564.068
877	0	0.18	0.0098	0.09	0.72	1.01	11.4	3.15	18	3.29	8.56	1.27	8.4	1.66	1.29	1.52	200	98.5	12611	0.35	0.09	1.58	1	1	57.7398	0.2798	34.28	23.18	82.8449	3.88889	0.0076	597.623
878	0.0044	0.33	0.0034	0.062	0.45	0.9	12	3.35	16.1	2.65	6.82	0.84	6.5	1.12	29.5	3.95	520	82	12748	0.25	0.09	1.23	1	1	51.1298	0.3998	32.8	17.93	44.8474	2.77778	0.00759615	580.776
879	0	0.16	0	0	0.46	0.86	9.5	2.73	15.2	2.73	7.18	1.12	7.03	1.31	40.2	1.53	267	85.6	12322	0.29	0.08	0.75	1	1	48.28	0.16	28.75	19.37	121.062	3.625	0.00573034	549.34
880	0.018	0.16	0.028	0.22	0.71	0.69	9.18	2.99	19.1	3.46	9.32	1.58	9.76	1.68	23.8	1.55	138	111	13018	0.11	0.05	2.36	1	1	58.896	0.426	32.67	25.8	60.5634	2.2	0.0112319	626.048
881	0.062	3.19	0.065	0.38	0.92	1.43	15.6	4.51	24.4	4.26	10.2	1.49	8.77	1.43	50.6	7.54	884	124	12721	0.5	0.14	121	1	1	76.707	3.697	46.86	26.15	7.0733	3.57143	0.00852941	1049.81
882	0.035	0.7	0	0.065	1.19	1.34	16.1	4.63	28.1	4.66	12.1	1.52	10.3	1.55	50.9	6.92	790	137	12554	0.52	0.15	2.09	1	1	82.29	0.8	51.36	30.13	37.6625	3.46667	0.00875949	617.247
883	0.036	0.8	0.014	0.32	1.07	1.22	16	3.87	17.7	2.52	5.47	0.71	4.68	0.79	24.9	9.73	844	72.9	13130	0.48	0.11	3.06	1	1	55.2	1.17	39.86	14.17	12.1111	4.36364	0.0115284	645.461
884	0.094	0.93	0.087	0.27	1.24	1.59	16.5	4.26	19.8	2.66	5.98	0.67	5.23	0.8	34.2	7.95	760	74.9	12789	0.41	0.08	4.31	1	1	60.111	1.381	43.39	15.34	11.1079	5.125	0.0104605	672.379
885	0.033	1.06	0.056	0.24	1.23	1.12	15.6	3.96	18.2	2.62	5.87	0.7	4.4	0.66	38.8	8.59	793	73.8	12947	0.35	0.13	2.36	1	1	55.749	1.389	40.11	14.25	10.2592	2.69231	0.0108323	626.048
886	0.0097	0.87	0.012	0.14	0.96	1.53	18	4.03	20.6	3.42	8.51	1.08	6.65	1.01	65.1	10.8	1025	104	12843	0.35	0.1	3.69	1	1	66.8217	1.0317	45.12	20.67	20.0349	3.5	0.0105366	659.981
887	0.044	0.93	0.079	0.61	1.35	1.27	15.7	4.44	23.1	4.07	8.75	1.21	7.81	1.3	58.7	10.1	887	113	12739	0.53	0.09	2.75	1	1	70.663	1.663	45.86	23.14	13.9146	5.88889	0.0113867	637.378
888	0.12	1.11	0.083	0.76	1.07	1.51	15	4.03	23.1	3.59	9.13	1.17	7.11	1.31	34.8	8.41	965	110	12534	0.58	0.13	3.71	1	1	69.093	2.073	44.71	22.31	10.7622	4.46154	0.00871503	660.407
889	0.026	0.71	0.0006	0.036	0.96	1.36	14.8	3.92	19.7	3.23	6.79	0.9	5.71	0.95	26.8	11.3	1014	89.7	12583	0.62	0.14	2.24	1	1	59.0926	0.7726	40.74	17.58	22.7543	4.42857	0.011144	622.247
890	0	0.71	0.0009	0.094	0.88	1.4	17.4	4.64	25.5	4.49	10	1.42	9.15	1.45	50.8	8.13	950	124	12859	0.41	0.13	3.17	1	1	77.1349	0.8049	49.82	26.51	32.9358	3.15385	0.00855789	648.166
891	0.0017	0.73	0	0.13	1.3	1.59	18.2	4.56	22.4	3.62	7.98	1.03	7.11	1.59	22.5	10.6	1017	106	12524	0.48	0.1	4.47	1	1	70.2417	0.8617	48.05	21.33	24.7534	4.8	0.0104228	675.337
892	0.028	0.93	0.044	0.17	1.24	1.58	18	4.52	24.5	3.5	8.54	1.31	7.65	1.19	32.8	10.3	1060	111	13023	0.48	0.11	16.4	1	1	73.202	1.172	49.84	22.19	18.9334	4.36364	0.00971698	794.429
893	0.13	2.11	0.1	0.66	1.24	1.46	15.1	4.2	21.5	3.24	7.65	0.86	6.08	1.03	56.3	12	1140	97.5	12707	0.45	0.1	3.77	1	1	65.36	3	43.5	18.86	6.28667	4.5	0.0105263	661.674
894	0.3	1.87	0.17	1.03	1.26	1.44	17.8	5.06	20.9	3.56	8.28	1.06	6.67	0.98	52.7	10.4	960	103	12852	0.49	0.12	4	1	1	70.38	3.37	46.46	20.55	6.09792	4.08333	0.0108333	666.38
895	0.16	1.9	0.14	0.9	1.79	1.82	19.4	4.8	25.2	4.13	9.75	1.23	8.26	1.39	56	11.9	987	121	12677	0.46	0.09	3.58	1	1	80.87	3.1	53.01	24.76	7.9871	5.11111	0.0120567	657.603
896	0.013	0.64	0.01	0.12	0.66	1.05	14.2	3.97	21.5	4.07	10.8	1.57	11.4	1.78	53.7	5.4	685	120	12775	0.3	0.08	1.88	1	1	71.783	0.783	41.38	29.62	37.8289	3.75	0.00788321	609.715
897	0.012	3.7	0.086	1.2	2.66	0.18	10.4	3.35	35.3	11.8	50.2	10.3	96.4	19.5	220	248	1078	357	11785	1.03	0.56	16.7	1	1	245.088	4.998	51.89	188.2	37.6551	1.83929	0.230056	796.301
898	0	0.0047	0	0.034	0.11	0.2	2.52	1.47	17.7	4.38	13.7	2.03	12.2	2	16.9	0.4	48.6	145	13414	0.46	0.084	0.38	1	1	56.3487	0.0387	22	34.31	886.563	5.47619	0.00823045	509.729
899	0	0.036	1.86	0.033	0.24	0.41	6.27	3.17	30.4	7.08	18.7	2.24	14.2	2.29	21.5	0.98	143	205	13307	0.98	0.12	2.05	1	1	86.929	1.929	40.49	44.51	23.0741	8.16667	0.00685315	615.863
900	0	0.041	0	0	0.22	0.32	5.23	2.87	36.7	11.2	35.6	4.67	31.6	4.79	29.4	1.06	67.8	350	12736	0.72	0.12	2.6	1	1	133.241	0.041	45.34	87.86	2142.93	6	0.0156342	633.19
901	0	0.056	0.0038	0	0.25	0.42	5.83	3.12	34.1	8.1	22.7	2.83	18.2	2.57	39	0.82	121	257	13292	1.25	0.13	1.47	1	1	98.1798	0.0598	43.72	54.4	909.699	9.61538	0.00677686	592.7
902	0	3.38	0.14	2.61	6.87	0.1	13.5	2.52	17	3.37	8.22	1.32	7.98	1.29	170	115	198	105	13209	0.32	0.19	14.8	1	1	68.3	6.13	39.99	22.18	3.61827	1.68421	0.580808	783.947
903	0	0.045	0	0.065	0.13	0.26	3.76	2.96	37.8	11.8	36	5.7	36.6	6.08	40.4	0.11	32.4	365	12734	0.64	0.07	1.21	1	1	141.2	0.11	44.91	96.18	874.364	9.14286	0.00339506	579.696
904	0	0.036	0.0037	0.067	0.29	0.24	4.31	2.56	33.6	9.6	28.4	3.98	26.7	4.28	57.3	0.44	72.4	298	13180	0.88	0.19	2.49	1	1	114.067	0.1067	41	72.96	683.786	4.63158	0.00607735	629.988
905	0	0.055	0.0036	0.033	0.13	0.36	5.3	3.25	31.9	8.55	23.1	3.31	19.6	3.01	12.7	1.59	95.5	262	12861	0.87	0.12	0.68	1	1	98.6016	0.0916	40.94	57.57	628.493	7.25	0.0166492	543.386
906	0	0.023	0	0.033	0.16	0.23	4.02	2.61	33.6	9.99	31.9	4.36	30.5	5.63	41.6	0.81	59.3	320	12806	0.69	0.14	1.43	1	1	123.056	0.056	40.62	82.38	1471.07	4.92857	0.0136594	590.833
907	0	0.022	0	0.065	0.22	0.31	5.11	2.96	31.7	8.8	26.6	3.81	26.6	4.19	31.2	0.57	84.1	280	12932	0.93	0.11	2.76	1	1	110.387	0.087	40.3	70	804.598	8.45455	0.00677765	637.65
908	0	0.15	0.0068	0.094	0.3	0.59	8.41	4.2	45.8	11.6	31.7	4.6	29.5	4.54	47.7	1.62	143	346	12668	0.59	0.093	1.77	1	1	141.491	0.2508	59.3	81.94	326.715	6.34409	0.0113287	605.484
909	0.057	3.96	0.44	6.17	12.6	0.21	24.5	4.06	23.9	5.17	15.2	2.53	21.1	3.3	261	141	562	152	12017	0.26	0.24	16.9	1	1	123.197	10.627	65.27	47.3	4.45093	1.08333	0.25089	797.535
910	0.0047	0.067	0	0	0.11	0.39	5.62	3.25	41.3	12.1	37.9	5.77	38.1	6.34	43.2	0.44	71	379	12204	0.62	0.09	1.84	1	1	150.952	0.0717	50.67	100.21	1397.63	6.88889	0.00619718	608.201
911	0.0047	0.038	0.016	0.07	0.099	0.31	5.2	2.88	31.8	8.19	23.2	3.1	19.7	3.03	24.6	1.77	88.8	264	12734	0.98	0.12	2.61	1	1	97.6377	0.1287	40.289	57.22	444.6	8.16667	0.0199324	633.475
912	0.0047	0.031	0	0	0.078	0.18	2.85	2.41	33.3	10.7	32.3	4.98	33.5	5.6	45.7	0.81	26.4	325	12298	0.39	0.071	0.97	1	1	125.934	0.0357	38.818	87.08	2439.22	5.49296	0.0306818	565.391
913	0	0.091	0.0037	0.2	0.13	0.59	6.77	3.59	38.4	9.78	27.4	3.72	24.8	3.78	20.6	1.19	121	285	13350	0.71	0.13	2.65	1	1	119.255	0.2947	49.48	69.48	235.765	5.46154	0.00983471	634.608
914	0	0.078	0	0.067	0.13	0.53	6.25	3.47	40.7	11	32	4.41	29.5	4.47	30.4	3.06	115	348	12513	1	0.17	2.71	1	1	132.605	0.145	51.08	81.38	561.241	5.88235	0.0266087	636.28
915	0	0.094	0.0063	0.057	0.32	0.65	8.67	5.08	65.7	20.4	67.2	10	69.7	11.5	37.6	0.97	111	637	21536	0.91	0.071	4.41	1	1	259.377	0.1573	80.42	178.8	1136.68	12.8169	0.00873874	674.238
916	0	0.12	0	0.032	0.37	0.59	9.2	4.17	42.9	10.4	29.5	3.86	24.4	3.85	40.1	1.47	150	314	12446	0.68	0.096	4.21	1	1	129.392	0.152	57.23	72.01	473.75	7.08333	0.0098	670.484
917	0.37	3.76	0.34	2.71	3.33	0.54	19.4	5.18	42	11.8	46.4	10.1	89.1	17.2	476	68.7	1449	375	13170	1.45	1.58	20.2	1	1	252.23	7.18	70.45	174.6	24.3175	0.917722	0.047412	816.36
918	0	0.064	0	0.034	0.27	0.39	7.13	3.31	35.5	8.39	24.3	3.36	21.3	3.16	23.4	1.17	122	263	12817	0.66	0.14	1.65	1	1	107.208	0.098	46.6	60.51	617.449	4.71429	0.00959016	600.607
919	0	0.075	0	0.0042	0.23	0.46	6.27	3.31	38.1	10.8	31.1	4.72	30.5	4.9	15.3	0.62	104	319	12703	0.66	0.092	0.77	1	1	130.469	0.0792	48.37	82.02	1035.61	7.17391	0.00596154	550.954
920	0.0047	0.08	0	0.033	0.13	0.37	5.38	2.7	32.7	9.01	28.3	4.2	24.9	4.25	17.3	0.66	82.8	280	12586	0.52	0.073	3.12	1	1	112.058	0.1177	41.28	70.66	600.34	7.12329	0.00797101	646.946
921	0.026	2.52	0.079	1.65	6.4	0.15	26.4	6.89	55	15.1	56.4	10.7	89.4	16.7	466	94	833	466	17962	0.54	0.21	11.1	1	1	287.415	4.275	94.84	188.3	44.0468	2.57143	0.112845	755.64
922	0.21	0.52	0.023	0.31	0.46	0.69	10.2	5.11	46.2	10.5	27.4	4.08	22.9	3.66	61.4	3.14	180	322	12802	0.73	0.14	1.21	1	1	132.263	1.063	62.66	68.54	64.4779	5.21429	0.0174444	579.696
923	0.019	0.1	0.011	0.2	0.11	0.42	4.94	3.53	41.9	11.9	36.8	5.4	36.3	6.27	83	1.14	44.9	373	12267	0.35	0.062	1.08	1	1	147.9	0.33	50.9	96.67	292.939	5.64516	0.0253898	572.281
924	0.0073	0.031	0.0056	0	0.2	0.46	6.57	5.2	75.5	23.3	73.6	10.9	73.8	11.9	66.8	0.26	52.9	717	20197	0.97	0.17	1.7	1	1	281.474	0.0439	87.93	193.5	4407.74	5.70588	0.00491493	602.674
925	0.21	26	0.33	6.53	16.4	0.78	51.3	11	84.6	23.4	81	14.9	124	22.3	635	336	1079	691	24866	0.8	0.26	22.7	1	1	462.75	33.07	164.08	265.6	8.03145	3.07692	0.311399	829.038
926	0.59	5.44	0.35	4.86	9.05	0.39	40.2	11.5	103	28	106	19.9	166	30.5	802	212	1360	884	33949	1.27	0.53	25.2	1	1	525.78	11.24	164.14	350.4	31.1744	2.39623	0.155882	840.643
927	0.42	17.2	0.28	2.94	6.01	0.5	32.7	13.3	110	39.8	177	37.3	346	70.1	398	411	584	1238	25461	3.89	2.16	36.8	1	1	853.55	20.84	162.51	670.2	32.1593	1.80093	0.703767	884.829
928	0.01	0.9	0	0.08	0	0	0.3	0.17	4.24	3.13	29.9	13.2	198	51.3	3.59	4.44	104	132	15295	3.04	2.42	0.9	1	1	301.23	0.99	4.71	295.53	298.515	1.2562	0.0426923	560.653
929	0	0.05	0.01	0	0	0.02	0.18	0.18	3.3	3.1	34.3	15.8	268	70.4	2.8	0.47	82.5	137	15778	3.55	3.13	3.24	1	1	395.34	0.06	3.68	391.6	6526.67	1.13419	0.00569697	649.846
930	0	0.08	0.01	0	0.03	0	0.33	0.15	3.75	3.23	34	15.2	254	67	2.12	0.84	61.5	142	14812	2.99	2.37	0.87	1	1	377.78	0.09	4.26	373.43	4149.22	1.2616	0.0136585	558.526
931	0	0.33	0	0	0	0.01	0.16	0.12	2.95	2.52	21.6	8.89	130	32.7	3.3	1.27	88.8	101	14417	2.08	1.72	1.54	1	1	199.28	0.33	3.24	195.71	593.061	1.2093	0.0143018	595.867
932	0	0.13	0	0.02	0.02	0.01	0.13	0.1	3.88	3.03	30.9	13.9	234	65	3.44	1.55	93.2	135	14244	3.85	3.56	3.12	1	1	351.12	0.15	4.14	346.83	2312.2	1.08146	0.0166309	646.946
933	0	0.14	0	0.04	0.02	0	0.2	0.16	4.16	3.4	33.4	14.4	226	60.9	2.64	0.57	71.9	150	13825	2.9	2.36	4.46	1	1	342.82	0.18	4.54	338.1	1878.33	1.22881	0.00792768	675.155
934	0	0.06	0	0	0	0.01	0.24	0.14	3.88	3.24	30.5	12.1	181	42.9	1.3	0.48	36.8	140	15367	2.03	1.6	2.97	1	1	274.07	0.06	4.27	269.74	4495.67	1.26875	0.0130435	643.188
935	0	0.07	0	0	0	0	0.16	0.13	3.58	2.55	23.4	9.38	137	32.8	1.71	0.44	46.9	115	13987	2.05	1.56	2.03	1	1	209.07	0.07	3.87	205.13	2930.43	1.3141	0.00938166	615.162
936	0	0.23	0	0.01	0.07	0.04	0.25	0.25	4.87	4.15	37.3	15.5	232	56.6	2.97	1.92	80.5	180	14277	2.95	2.13	3.77	1	1	351.27	0.24	5.48	345.55	1439.79	1.38498	0.0238509	661.674
937	0.01	0.96	0.01	0	0.01	0.02	0.33	0.25	4.92	3.69	36	15.5	251	66.7	4.53	8.76	108	156	15181	3.14	2.42	2.49	1	1	379.4	0.98	5.53	372.89	380.5	1.29752	0.0811111	629.988
938	0	0.29	0	0	0	0.01	0.39	0.43	7.06	4.47	38.5	16.6	270	72.4	3.44	2.18	75	166	15688	3.09	2.85	0.78	1	1	410.15	0.29	7.89	401.97	1386.1	1.08421	0.0290667	551.747
939	0	0.48	0.01	0	0.02	0	0.24	0.15	3.4	2.79	26.5	13.2	234	73.8	3.56	2.18	86.5	118	14468	3.15	3.12	1.09	1	1	354.59	0.49	3.81	350.29	714.878	1.00962	0.0252023	572.878
940	0.01	12.1	0.03	0.46	1.9	0.32	13.6	5.29	67.9	27.9	132	28.7	279	57.5	33	119	410	862	14604	3.97	1.54	2.63	1	1	626.71	12.6	89.01	525.1	41.6746	2.57792	0.290244	634.043
941	0	3.96	0.01	0.11	0.26	0.04	3.24	1.27	19.4	8.81	51.6	14.9	181	42.4	17.9	52.3	194	300	13350	5.25	3.49	2.14	1	1	327	4.08	24.21	298.71	73.2132	1.5043	0.269588	618.946
942	0.15	12.7	0.03	0.43	1.37	0.07	9.26	4.02	59.1	27	137	34.7	383	85.9	59.1	141	614	835	15693	13.7	10.3	5.49	1	1	754.73	13.31	73.82	667.6	50.1578	1.3301	0.229642	692.367
943	0.05	10.7	0.07	0.91	1.48	0.2	8.77	3.08	43.1	18.9	97.3	24.5	272	62.9	50.1	105	506	613	15189	8.32	13.6	4.72	1	1	543.96	11.73	56.63	475.6	40.5456	0.611765	0.20751	679.787
944	0.03	52	0.12	2.01	4.17	0.85	23.4	8.34	105	43.7	217	51	520	106	74.9	624	576	1376	9180	17	6.25	34.2	1	1	1133.62	54.16	141.76	937.7	17.3135	2.72	1.08333	876.007
945	0.03	13	0.16	2.07	4.35	1.16	26.4	8.44	102	39.6	182	40.3	410	85.9	15.3	72.8	133	1147	8985	3.01	1.25	7.97	1	1	915.41	15.26	142.35	757.8	49.6592	2.408	0.547368	724.866
946	0	12.5	0.01	0.38	1.34	0.19	9.41	4.33	59.5	26	137	32.1	333	67.7	43.5	112	391	833	13256	8.69	4.04	1.11	1	1	683.46	12.89	74.77	595.8	46.2219	2.15099	0.286445	574.057
947	0	23.5	0.05	0.67	2.52	0.19	19.2	8.37	116	50.3	254	58.3	592	123	72.5	243	586	1600	13114	16.5	7.64	5.87	1	1	1248.1	24.22	146.28	1077.6	44.4922	2.15969	0.414676	698.046
948	0.02	30.1	0.27	4.59	9.41	1.47	50	17.2	209	77.9	349	72.5	653	126	51.2	264	409	2300	11553	5.47	2.08	6.32	1	1	1600.46	34.98	287.08	1278.4	36.5466	2.62981	0.645477	704.39
949	0.01	16.7	0.08	1.09	3.72	0.77	26.5	9.38	120	49.9	235	51.8	499	98.4	23.3	94.4	175	1473	9902	3.73	1.42	4.21	1	1	1112.35	17.88	160.37	934.1	52.2427	2.62676	0.539429	670.484
950	0.01	25.1	0.04	0.87	2.75	0.5	24	10.9	155	69.5	363	85.4	875	178	100	386	775	2191	12081	24.4	7.84	10.9	1	1	1790.07	26.02	193.15	1570.9	60.3728	3.11224	0.498065	753.901
951	0.01	60.9	0.14	3.07	7.86	1.79	58.6	20.4	254	99	453	95.5	928	183	144	957	948	2964	9379	21.8	6.93	13.2	1	1	2165.27	64.12	342.65	1758.5	27.4251	3.14574	1.00949	772.505
952	0.01	29.6	0.07	1.54	3.5	1.08	24.8	8.89	110	43	201	43.9	419	83	18.9	103	130	1317	11381	3.81	1.57	3.53	1	1	969.39	31.22	148.27	789.9	25.3011	2.42675	0.792308	656.501
953	0.02	27.5	0.09	1.62	4.78	1.19	34.8	11.9	152	62.2	298	64.6	615	129	48.1	215	318	1878	9587	4.67	2.15	4.28	1	1	1402.7	29.23	204.67	1168.8	39.9863	2.17209	0.676101	671.814
954	0.01	13.6	0.03	0.46	1.38	0.35	12.5	5.73	81.2	35.2	185	43.7	460	97.5	35.7	106	258	1149	13122	8.24	3.35	23.3	1	1	936.66	14.1	101.16	821.4	58.2553	2.4597	0.410853	831.913
955	0.02	70.8	0.4	5.96	13.7	2.02	77.4	24.8	294	111	478	95	859	162	62.2	427	360	3159	9585	13.1	3.52	13.4	1	1	2194.1	77.18	411.92	1705	22.0912	3.72159	1.18611	773.994
956	0.06	24.3	0.05	0.93	2.37	0.33	17.2	7.25	97.9	42.8	212	48	490	100	71.2	295	460	1321	12041	10.6	4.2	9.14	1	1	1043.19	25.34	125.05	892.8	35.2328	2.52381	0.641304	737.365
957	0.06	16.4	0.1	1.46	3.74	0.71	26.6	10.3	132	53.9	261	57.8	559	114	44.4	182	280	1644	11685	5.71	2.33	7.72	1	1	1237.07	18.02	173.35	1045.7	58.03	2.45064	0.65	722.002
958	0.06	28.1	0.13	1.54	3.58	0.9	21.1	8.06	106	45.8	228	50.3	511	107	27.3	117	168	1417	9954	6.58	2.54	2.41	1	1	1111.57	29.83	139.64	942.1	31.5823	2.59055	0.696429	627.585
959	0.11	33.4	0.31	4.95	9.52	1.46	45.1	15.4	180	68.8	312	64.9	607	118	40.1	202	221	2039	10585	3.79	1.82	3.73	1	1	1460.95	38.77	251.48	1170.7	30.196	2.08242	0.914027	660.831
960	0	0.33	0	0	0.03	0.08	0.82	0.43	6.45	3.45	18	5.24	66	16.5	5.88	1.37	166	121	15388	1.19	1.75	3.22	1	1	117.33	0.33	7.81	109.19	330.879	0.68	0.00825301	649.369
961	0.01	0.29	0	0	0.07	0.06	0.94	0.44	7.04	3.48	19.4	5.77	65	13.7	5.27	0.5	151	135	14818	1.94	1.99	3.54	1	1	116.2	0.3	8.55	107.35	357.833	0.974874	0.00331126	656.723
962	0.01	0.24	0	0.01	0.03	0	0.17	0.2	4.32	2.91	25.5	8.59	108	23.7	3.07	1.56	83.5	134	13532	1.53	1.15	4.22	1	1	173.68	0.26	4.72	168.7	648.846	1.33043	0.0186826	670.675
963	0	0.11	0	0	0	0	0.06	0.22	6.34	4.7	47.3	17.3	228	53.9	3.02	0.72	88.4	207	14127	2.65	2	2.01	1	1	357.93	0.11	6.62	351.2	3192.73	1.325	0.0081448	614.456
964	0.03	3.92	0.02	0.22	0.27	0.22	1.96	0.86	10.6	4.55	23.9	6.16	68.9	14.7	9.89	13.6	251	186	15947	2.67	2.14	13.6	1	1	136.31	4.19	13.91	118.21	28.2124	1.24766	0.0541833	775.466
965	0	0.11	0	0.04	0.03	0.05	0.65	0.3	5.67	2.59	13.2	3.3	30.9	6.22	1.95	0.31	54.4	104	13490	1.68	1.65	2.63	1	1	63.06	0.15	6.7	56.21	374.733	1.01818	0.00569853	634.043
966	0.1	0.11	0.01	0	0	0	0.17	0.08	2.87	2.37	23.1	8.57	120	28.5	1.77	0.25	49.4	103	13415	2.14	1.98	1.51	1	1	185.88	0.22	3.12	182.54	829.727	1.08081	0.00506073	594.525
967	0	0.36	0.01	0	0	0.04	0.66	0.29	7.57	5.03	33.1	10.3	128	29.7	4.42	3.69	117	195	13802	2.64	1.75	3.28	1	1	215.06	0.37	8.56	206.13	557.108	1.50857	0.0315385	650.793
968	0	0.09	0	0	0.06	0.03	0.24	0.11	3.01	2.16	19.1	7.06	93.8	22.2	2.21	0.33	57.7	97.6	13775	1.45	2.27	2.33	1	1	147.86	0.09	3.45	144.32	1603.56	0.638767	0.00571924	625.113
969	0	0.25	0.01	0.07	0	0	0.47	0.28	4.42	1.17	7.36	1.47	15.4	3.09	1.61	0.39	44.2	52.7	13810	1.06	0.92	0.42	1	1	33.99	0.33	5.17	28.49	86.3333	1.15217	0.00882353	515.319
970	0	0.12	0	0	0.02	0.04	0.43	0.33	5.97	3.14	18.2	4.87	59.3	12.3	2.13	0.18	56.7	122	13918	1.26	1.67	1.87	1	1	104.72	0.12	6.79	97.81	815.083	0.754491	0.0031746	609.339
971	0	0.32	0	0	0.04	0.03	0.3	0.21	4.61	3.17	26.8	9.71	130	30.9	2.95	1.03	74	135	13389	1.68	1.49	1.75	1	1	206.09	0.32	5.19	200.58	626.812	1.12752	0.0139189	604.691
972	0	2.34	0	0.11	0.12	0.09	0.94	0.46	8.68	5.23	33.7	10.5	130	29.4	11	10	282	201	13254	3.81	2.67	3.32	1	1	221.57	2.45	10.29	208.83	85.2367	1.42697	0.035461	651.73
973	0	0.07	0.09	0.05	0	0	0.13	0.14	3.67	3.45	32.3	11.8	162	37.6	1.82	0.24	46.4	150	12783	1.47	1.55	1.32	1	1	251.3	0.21	3.94	247.15	1176.9	0.948387	0.00517241	585.461
974	0.13	42.6	0.27	3.78	7.54	1.16	37.8	12.7	153	60.8	285	62.8	619	131	56.5	380	589	1843	10337	11.5	3.95	19.9	1	1	1417.58	46.78	212.2	1158.6	24.767	2.91139	0.645161	814.756
975	0.02	54.4	0.07	1.87	4.58	0.77	34.6	11.5	146	59.4	274	61.1	585	124	41.2	263	375	1780	11704	20.2	6.28	21.3	1	1	1357.31	56.36	197.45	1103.5	19.5795	3.21656	0.701333	822.085
976	0.03	14.4	0.03	0.73	1.7	0.22	12.2	5.11	74.2	32	171	44.1	479	107	77.9	190	765	1058	16116	14.3	13.6	9.61	1	1	941.72	15.19	93.43	833.1	54.8453	1.05147	0.248366	742.019
977	0.04	20.5	0.04	0.79	2.03	0.48	17.6	7.53	107	45.7	231	53.9	520	111	66.5	263	611	1453	13223	16.6	6.35	9.68	1	1	1117.61	21.37	134.64	961.6	44.9977	2.61417	0.430442	742.696
978	0.01	26.2	0.08	1.64	2.86	0.59	18.3	6.32	83	34.1	170	38.9	384	81.8	32.2	183	268	1082	11960	6.82	2.7	4.15	1	1	847.8	27.93	111.07	708.8	25.3777	2.52593	0.682836	669.329
979	1.73	22.6	0.65	4.82	4.62	1.17	23.4	8.5	105	42.4	199	42.4	401	82	24.3	105	204	1289	11852	3.88	2.01	23.2	1	1	939.29	29.8	142.69	766.8	25.7315	1.93035	0.514706	831.438
980	0.03	16	0.11	2.55	4.47	0.68	22.8	7.46	91.6	36.8	167	37.2	348	70.6	21.7	93.1	172	1083	11497	2.81	1.94	3.19	1	1	805.3	18.69	127.01	659.6	35.2916	1.44845	0.541279	648.649
981	0.01	24.2	0.04	1.2	2.93	0.37	19.7	7.7	99.2	41.7	202	45.7	439	92.1	39.9	163	317	1289	12138	8.32	3.98	4.78	1	1	975.85	25.45	129.9	820.5	32.2397	2.09045	0.514196	680.826
982	0.43	38.7	0.55	8.88	15	2.3	67.7	23.3	271	101	443	91.8	834	168	54.5	251	408	2926	9562	7.25	2.32	29.2	1	1	2065.66	48.56	379.3	1637.8	33.7273	3.125	0.615196	857.428
983	0.01	12.4	0.06	0.58	1.55	0.24	12.6	5.05	72.1	31.5	159	39.5	413	88	74.1	156	589	1022	15796	14.4	10.9	9.28	1	1	835.59	13.05	91.54	731	56.0153	1.3211	0.264856	738.771
984	0.34	59.3	0.33	6.29	11	1.25	54.9	19.5	240	94.5	443	96.3	927	184	97.3	536	633	2851	10143	11.9	3.93	13.5	1	1	2137.71	66.26	326.65	1744.8	26.3326	3.02799	0.846761	774.733
985	0.71	49.8	0.26	3.91	5.87	2.49	32.3	11.6	147	56	263	55.3	541	114	43.8	367	247	1727	8910	7.1	1.89	10.2	1	1	1283.24	54.68	199.26	1029.3	18.8241	3.75661	1.48583	747.605
986	0.9	60.3	0.55	6.32	11	1.5	59.1	19.8	237	92.2	428	89.5	846	167	59.2	383	356	2794	9104	7.68	2.67	16.3	1	1	2019.17	68.07	328.4	1622.7	23.8387	2.8764	1.07584	793.798
987	0.08	29.9	0.28	3.65	2.94	0.62	23.2	9.55	129	54.7	268	62.6	607	125	49.8	182	329	1707	12396	11.5	4.98	4.74	1	1	1316.52	33.91	165.31	1117.3	32.949	2.30924	0.553191	680.135
988	0.01	15	0.08	0.42	2.12	0.25	16.6	7.51	103	46	238	55.6	554	117	66.6	171	463	1458	14204	14.8	6.51	3.57	1	1	1155.59	15.51	129.48	1010.6	65.158	2.27343	0.36933	657.383
989	0.01	28.3	0.04	1.05	2.95	0.61	25	9.1	121	52.1	255	57.8	575	118	65.4	254	404	1619	12470	9.02	3.57	3.87	1	1	1245.96	29.4	158.66	1057.9	35.983	2.52661	0.628713	663.748
990	1.48	37.7	1.01	5.67	6.19	1.4	38.7	14.7	186	77.6	366	79.9	771	152	67.9	280	424	2364	11527	13.2	4.82	9.17	1	1	1739.35	45.86	246.99	1446.5	31.5416	2.73859	0.660377	737.668
991	0.09	31.6	0.07	1.29	3.75	0.52	30.1	11.9	161	69.1	331	76.2	715	149	69.4	279	448	2134	12015	13.2	5.01	10.9	1	1	1580.62	33.05	207.27	1340.3	40.5537	2.63473	0.622768	753.901
992	0	0.68	0	0.03	0.29	0.32	2.31	0.83	7.74	2.13	7.7	1.54	11.1	2.32	3.21	1.05	94.5	73.7	12030	0.18	0.07	1.5	1	1	36.99	0.71	11.49	24.79	34.9155	2.57143	0.0111111	594.073
993	0.01	0.76	0	0.02	0.22	0.25	2.5	0.66	7.2	1.95	8.46	2	18.4	3.93	4.6	4.14	126	68.5	12238	0.31	0.2	2.89	1	1	46.36	0.79	10.83	34.74	43.9747	1.55	0.0328571	641.118
994	0.13	0.61	0	0	0.19	0.16	1.46	0.41	4.71	1.41	4.82	1	9.87	2.2	3.2	0.62	91.5	44	12009	0.12	0.13	2.23	1	1	26.97	0.74	6.93	19.3	26.0811	0.923077	0.00677596	621.922
995	0	0.78	0.01	0.02	0.63	0.54	4.43	1.27	10.8	2.72	9.29	1.55	13.4	2.49	4.04	1.05	116	90.8	11606	0.17	0.14	2.56	1	1	47.93	0.81	17.67	29.45	36.358	1.21429	0.00905172	632.039
996	0	0.38	0	0	0.1	0.14	1.36	0.61	5.61	1.67	6.24	1.12	11.3	2.3	1.67	0.49	46.1	59.1	12512	0.28	0.25	2.9	1	1	30.83	0.38	7.82	22.63	59.5526	1.12	0.0106291	641.379
997	0	0.33	0	0.06	0.1	0.11	1.47	0.67	9.56	3.32	15.4	3.36	31.7	6.69	2.31	0.53	61.9	115	11783	0.15	0.34	2.15	1	1	72.77	0.39	11.91	60.47	155.051	0.441176	0.0085622	619.282
998	0	0.47	0	0	0.14	0.15	2.36	0.7	6.72	2.2	6.77	1.28	11.4	2.08	2.21	0.52	60.5	69	11091	0.12	0.03	3.17	1	1	34.27	0.47	10.07	23.73	50.4894	4	0.00859504	648.166
999	0	0.82	0	0.06	0.32	0.3	3.23	1.05	9.13	2.24	8.83	1.56	13.9	2.5	3.18	0.79	90.7	79.7	11737	0.15	0.11	1.71	1	1	43.94	0.88	14.03	29.03	32.9886	1.36364	0.00871003	603.082
1000	0	0.47	0.01	0.19	0.25	0.23	1.82	0.65	6.66	2.2	8.97	1.86	15.7	3.03	3.14	2.15	84.1	72	12308	0.34	0.31	3.43	1	1	42.04	0.67	9.61	31.76	47.403	1.09677	0.0255648	654.26
1001	0.01	0.61	0	0.08	0.23	0.19	2.05	0.56	4.98	1.38	4.62	0.88	7.58	1.28	2.91	0.53	81	48.5	11373	0.08	0.05	1.96	1	1	24.45	0.7	8.01	15.74	22.4857	1.6	0.00654321	612.664
1002	0	0.45	0	0.05	0.1	0.25	2.41	0.92	8.32	2.42	9.04	1.64	13.7	2.6	2.73	0.41	75.1	83.3	11793	0.24	0.24	0.99	1	1	41.9	0.5	12	29.4	58.8	1	0.00545939	566.691
1003	0	0.38	0	0.08	0.14	0.19	1.65	0.61	6.8	1.76	6.64	1.12	10.1	1.86	2.58	0.31	70.4	63.3	11417	0.2	0.18	1.67	1	1	31.33	0.46	9.39	21.48	46.6957	1.11111	0.00440341	601.44
1004	0.01	0.54	0	0.13	0.23	0.21	1.83	0.63	6.32	1.79	7.15	1.24	10.6	2.21	2.28	0.5	60.8	64.4	11976	0.07	0.06	4.58	1	1	32.89	0.68	9.22	22.99	33.8088	1.16667	0.00822368	677.32
1005	0	0.37	0.01	0	0.06	0.21	1.44	0.56	5.25	1.73	6.46	1.11	10.6	1.88	1.6	1.05	41.1	54.5	13092	0.27	0.17	0.79	1	1	29.68	0.38	7.52	21.78	57.3158	1.58824	0.0255474	552.532
1006	0.02	25.3	0.29	5.18	9.3	1.78	48.6	15.5	183	71.1	325	70.5	690	142	32.2	168	311	2112	8128	4.38	1.55	6.35	1	1	1587.57	30.79	258.18	1298.6	42.176	2.82581	0.540193	704.8
1007	0.38	85.5	0.62	7.82	13.8	1.91	80.7	28.1	313	124	555	118	1073	211	82.3	678	708	3695	10617	11.9	5.08	8.68	1	1	2612.83	94.32	437.51	2081	22.0632	2.34252	0.957627	732.616
1008	0.14	39.2	0.11	1.87	3.66	1.01	22.7	8.3	103	44.4	211	47.5	451	95.4	27.5	169	242	1393	9589	6.4	1.98	30.9	1	1	1029.29	41.32	138.67	849.3	20.5542	3.23232	0.698347	864.01
1009	0.03	23.1	0.16	2.19	4.31	0.78	24.2	7.7	96.7	38	172	36.6	337	66.1	16.4	109	123	1145	8871	2.54	0.92	39.9	1	1	808.87	25.48	133.69	649.7	25.4984	2.76087	0.886179	894.726
1010	0.01	36.5	0.08	1.41	3.41	0.85	22.3	7.5	97.2	36.8	163	34.3	328	65.1	48	362	357	1105	11020	7	2.27	4.26	1	1	796.46	38	131.26	627.2	16.5053	3.0837	1.01401	671.436
1011	0.26	23.3	0.2	1.5	2.67	0.83	20.7	8.36	112	47.8	230	53.7	523	108	72.7	302	581	1487	12917	17.4	6.3	9.52	1	1	1132.32	25.26	144.56	962.5	38.1037	2.7619	0.519793	741.142
1012	0	15.3	0.02	0.36	1.52	0.37	12	4.58	61.6	26	133	30.9	310	64.5	20	63.4	167	834	10840	4.89	1.96	3.34	1	1	660.15	15.68	80.07	564.4	35.9949	2.4949	0.379641	652.195
1013	0.01	24.2	0.06	1.11	2.33	0.51	14.9	5.69	71.5	29.1	139	31.2	300	63.8	16.3	77.7	121	908	10527	3.52	1.5	4.21	1	1	683.41	25.38	94.93	563.1	22.1868	2.34667	0.642149	670.484
1014	0.02	44.1	0.13	2	5.26	1.04	33.9	11.7	156	61.5	286	62.4	576	116	48.2	302	299	1885	9172	6.76	2.22	16.8	1	1	1356.05	46.25	207.9	1101.9	23.8249	3.04505	1.01003	796.919
1015	0.47	39.7	0.37	2.73	4.44	1	31.5	11.3	149	60.3	281	62.1	591	118	67.8	374	429	1814	11036	11.7	4.15	6.4	1	1	1352.91	43.27	197.24	1112.4	25.7083	2.81928	0.871795	705.479
1016	0	22	0.04	0.92	2.64	0.37	15.4	6.05	78.6	31.7	153	34.9	341	70.1	38.5	180	244	1007	10016	4.36	2.05	6.23	1	1	756.72	22.96	103.06	630.7	27.4695	2.12683	0.737705	703.152
1017	0.01	16.1	0.11	1.8	3.91	0.68	22.2	8.44	103	40	183	39.4	370	75.9	14.7	69.4	91.7	1207	8558	1.72	0.66	13.6	1	1	864.55	18.02	138.23	708.3	39.3063	2.60606	0.756816	775.466
1018	1.2	36.1	0.73	5.69	6.12	1.47	30.3	11.4	151	63.5	306	69.4	682	140	89.6	356	582	1950	12182	17.8	4.99	18.8	1	1	1504.91	43.72	200.29	1260.9	28.8403	3.56713	0.611684	808.701
1019	0	12.8	0.01	0.51	1.35	0.24	9.89	3.77	52.2	22.6	111	26.2	262	55.6	13.6	47.6	90.8	703	11849	2.22	1.05	3.52	1	1	558.17	13.32	67.45	477.4	35.8408	2.11429	0.524229	656.28
1020	0	65.5	0.12	3.15	6.45	0.43	34.1	12.5	154	58.2	251	52.6	474	93.9	32.1	212	175	1652	11469	6.9	2.61	9.96	1	1	1205.95	68.77	207.48	929.7	13.519	2.64368	1.21143	745.366
1021	0	0.43	0	0.03	0.02	0.08	1.61	0.82	12.6	5.13	23.2	4.82	45	8.58	1.94	0.16	55.6	178	12183	2.15	0.83	2.59	1	1	102.32	0.46	15.13	86.73	188.543	2.59036	0.0028777	632.904
1022	0.01	0.79	0	0	0.22	0.17	2.51	1	13.4	4.14	14.8	2.83	22.2	3.73	3.38	1.2	98.6	153	13166	1.06	0.59	3.45	1	1	65.8	0.8	17.3	47.7	59.625	1.79661	0.0121704	654.712
1023	0	0.59	0	0	0.12	0.12	1.94	1.15	15.3	4.67	16	3.09	26.1	4.68	2.49	0.56	73.6	166	15037	1.84	0.93	1.42	1	1	73.76	0.59	18.63	54.54	92.4407	1.97849	0.0076087	590.359
1024	0.01	1.79	0	0	0.03	0.06	0.82	0.58	9.79	4.58	24.9	5.36	56.7	13.6	4.53	1.36	105	176	14655	3.1	1.34	1.54	1	1	118.22	1.8	11.28	105.14	58.4111	2.31343	0.0129524	595.867
1025	0	0.4	0	0.03	0.28	0.19	1.68	0.91	12.3	5.01	19.6	3.58	32.3	5.82	1.85	0.6	49.9	166	12444	2.31	0.56	3.3	1	1	82.1	0.43	15.36	66.31	154.209	4.125	0.012024	651.263
1026	0	0.98	0	0.08	0.24	0.27	2.87	0.99	12.2	3.21	10.4	1.76	13.5	2.32	2.36	1.05	64.7	112	10935	0.24	0.11	3.1	1	1	48.82	1.06	16.57	31.19	29.4245	2.18182	0.0162287	646.454
1027	0.04	1.03	0	0.02	0.35	0.26	3.52	1.63	15.8	4.49	15.7	2.55	20.7	3.28	3.38	0.77	93	159	12439	0.82	0.47	5.29	1	1	69.37	1.09	21.56	46.72	42.8624	1.74468	0.00827957	689.247
1028	0	0.38	0	0	0	0.11	1.99	1.14	15.7	6.25	23.7	4.37	36.6	6.2	1.76	0.25	50.7	210	12773	2	0.67	3.24	1	1	96.44	0.38	18.94	77.12	202.947	2.98507	0.00493097	649.846
1029	0	0.56	0	0	0.09	0.13	1.89	1.1	13.9	5.84	25.1	5.33	50.9	8.88	2.67	0.61	69.6	198	14053	2.51	0.81	3.97	1	1	113.72	0.56	17.11	96.05	171.518	3.09877	0.00876437	665.779
1030	0	0.81	0	0	0.19	0.35	3.19	1.41	14.9	4.22	14.2	2.5	19.6	3.4	2.95	0.71	81.6	151	12720	0.72	0.48	3.03	1	1	64.77	0.81	20.04	43.92	54.2222	1.5	0.00870098	644.71
1031	0.03	57.5	0.69	11	16.1	4.98	64.6	18.4	207	75	324	61.1	537	105	9.16	67.7	72.2	2144	7374	4.82	0.86	8.54	1	1	1482.4	69.22	311.08	1102.1	15.9217	5.60465	0.937673	731.13
1032	0.02	16.1	0.2	3.56	5.34	1.07	28.8	9.1	104	39.4	181	36.5	342	70.4	17.4	129	131	1178	8047	2.41	0.72	11.3	1	1	837.49	19.88	148.31	669.3	33.667	3.34722	0.984733	757.353
1033	0.14	9.66	0.2	2.99	4	0.6	13.1	4.62	48.2	17.4	77.5	17.8	169	37.3	21.3	37	188	515	9707	2.04	0.69	24.7	1	1	402.51	12.99	70.52	319	24.5574	2.95652	0.196809	838.398
1034	0.01	14.9	0.05	0.85	2.74	0.39	14.4	5.17	61.6	24.3	115	25.1	231	47.1	12.2	50	92.4	750	9156	3.92	1.13	5.61	1	1	542.61	15.81	84.3	442.5	27.9886	3.46903	0.541126	694.195
1035	0.02	44.9	0.12	2.19	5.72	0.55	31.7	11.9	154	61.3	280	59.7	553	110	84.9	421	610	1818	9900	10.6	3.05	9.59	1	1	1315.1	47.23	203.87	1064	22.5281	3.47541	0.690164	741.825
1036	0.19	26.9	0.18	2.35	3.19	0.45	21.8	7.39	96.6	38.3	187	39.3	366	71	32.3	136	243	1173	9504	6.7	2.07	8.08	1	1	860.65	29.62	129.43	701.6	23.6867	3.23671	0.559671	726.103
1037	0.05	12.9	0.07	0.64	2.07	0.27	9.09	3.62	47	19.6	96.2	22.2	225	47.8	17.9	50.5	137	604	10213	3.29	1.44	5.94	1	1	486.51	13.66	62.05	410.8	30.0732	2.28472	0.368613	699.058
1038	0.02	33.1	0.35	6.07	10.1	0.95	46.6	15.6	182	68.5	308	62.7	576	113	29.9	195	189	2036	8599	5.71	1.48	7.34	1	1	1422.99	39.54	255.25	1128.2	28.5331	3.85811	1.03175	717.5
1039	0	24.3	0.01	0.47	1.26	0.13	9.93	5.12	76.3	34.7	183	44.4	436	86.2	46.3	130	334	1157	14163	18.6	6.84	5.06	1	1	901.82	24.78	92.74	784.3	31.6505	2.7193	0.389222	685.537
1040	0	25.9	0.16	4.08	9.08	0.47	49.1	16.9	209	76.2	330	66.8	587	115	27.9	137	187	2186	10219	4.59	1.45	6.64	1	1	1489.69	30.14	284.55	1175	38.9847	3.16552	0.73262	708.68
1041	0.04	20.5	0.05	1.04	2.57	0.15	15.8	6.22	81.6	33	159	34.8	332	66.7	27	93.6	179	990	11081	6.66	2.21	3.85	1	1	753.47	21.63	106.34	625.5	28.9182	3.01357	0.522905	663.337
1042	0.03	32.7	0.49	8.23	13	2.22	70	23	260	98.3	430	84.9	757	146	32.8	197	191	2872	7705	3.73	0.97	5.9	1	1	1925.87	41.45	368.22	1516.2	36.579	3.84536	1.03141	698.481
1043	0.51	63.2	0.39	4.61	8.66	1.5	52.7	18.5	235	94	422	86.4	762	146	46	240	289	2712	9111	11.3	2.38	12.7	1	1	1895.47	68.71	316.36	1510.4	21.9822	4.7479	0.83045	768.698
1044	0.47	60.5	0.34	4.33	7.67	1.64	44.6	15.8	191	73.4	325	65.1	580	110	33.8	175	201	2116	8812	9.09	2.19	3.51	1	1	1479.85	65.64	260.71	1153.5	17.5731	4.15068	0.870647	656.057
1045	0.03	28.1	0.15	2.25	4.95	1.43	23.8	7.95	98.2	39.2	179	39.8	389	80.1	10.1	55.2	62.8	1154	8148	2.81	0.78	7.28	1	1	893.96	30.53	136.33	727.1	23.8159	3.60256	0.878981	716.772
1046	0	65.5	0.09	3.79	5.98	1.87	33.1	10.7	126	46.5	202	41.6	384	76	7.72	56.3	41.5	1354	7829	2.72	0.76	8.23	1	1	997.13	69.38	177.65	750.1	10.8115	3.57895	1.35663	727.767
1047	0.07	79.3	0.71	13.8	18.7	5.04	76.9	22.5	251	90.8	387	74.1	647	124	10	93.5	46.9	2568	7600	2.18	0.63	12.7	1	1	1790.92	93.88	374.14	1322.9	14.0914	3.46032	1.9936	768.698
1048	0	25.3	0.11	2.42	3.62	1.24	20.4	6.02	73.6	27	122	25.4	238	47.7	13	36	87.3	805	9902	5.11	2.38	2.72	1	1	592.81	27.83	104.88	460.1	16.5325	2.14706	0.412371	636.556
1049	0.05	36.7	0.28	5.11	9.33	0.56	50.5	17.1	212	80.9	365	76.6	715	138	65.9	332	379	2401	8345	6.03	2.44	15.9	1	1	1707.13	42.14	289.49	1375.5	32.6412	2.47131	0.875989	791.245
1050	0.02	21.8	0.13	1.68	3.42	1.04	17	6.32	76.9	29.3	139	30.5	298	61.2	5.63	36.4	30.9	886	8407	1.48	0.53	5.08	1	1	686.31	23.63	104.68	558	23.614	2.79245	1.17799	685.865
1051	0	54.1	0.15	2.7	6.57	0.6	41.6	15.5	195	78.3	359	75.9	711	138	67.4	290	415	2308	9272	12	3.81	5.84	1	1	1678.42	56.95	259.27	1362.2	23.9192	3.14961	0.698795	697.608
1052	0.02	52.3	0.23	5.41	9.17	1.53	48.3	16.2	193	74.3	336	67.7	611	118	32.5	195	185	2172	7727	5.5	1.53	8.52	1	1	1533.16	57.96	268.2	1207	20.8247	3.59477	1.05405	730.916
1053	0	2.01	0	0.14	1.28	1.22	8.17	1.8	14.3	3.08	9.27	1.39	10.7	1.7	13.1	2.85	374	100	10112	0.12	0.03	5.56	1	1	55.06	2.15	26.77	26.14	12.1581	4	0.00762032	693.437
1054	0	0.47	0	0.08	0.19	0.25	1.75	0.4	2.89	0.73	2.25	0.36	2.69	0.44	2.85	0.45	79.7	24.6	10851	0.04	0.01	0.46	1	1	12.5	0.55	5.48	6.47	11.7636	4	0.00564617	520.469
1055	0	1.23	0	0	0.72	0.83	5.25	0.84	6.49	1.35	3.76	0.56	4.1	0.65	6.95	6.41	194	44.6	10893	0.1	0.02	3.8	1	1	25.78	1.23	14.13	10.42	8.47154	5	0.0330412	662.301
1056	0	0.73	0	0.33	1.11	1.36	7.57	1.44	11.1	2.35	6.52	0.9	5.96	1.01	4.67	0.93	137	73.9	10233	0.11	0.02	2.24	1	1	40.38	1.06	22.58	16.74	15.7925	5.5	0.00678832	622.247
1057	0	0.84	0	0.05	0.41	0.51	3.25	0.75	5.25	1.39	3.87	0.58	4.27	0.63	4.01	0.63	111	41.6	10669	0.03	0.03	2.97	1	1	21.8	0.89	10.17	10.74	12.0674	1	0.00567568	643.188
1058	0	0.94	0	0.14	0.45	0.48	4.21	0.7	4.46	0.84	2.65	0.39	2.69	0.49	5.64	3.05	161	29.1	11183	0.05	0.02	5.14	1	1	18.44	1.08	10.3	7.06	6.53704	2.5	0.0189441	686.843
1059	0	1.48	0	0	0.57	0.52	3.64	0.67	5.36	1.21	3.47	0.56	3.87	0.71	3.89	1.25	110	39	11297	0.07	0.03	2.16	1	1	22.06	1.48	10.76	9.82	6.63514	2.33333	0.0113636	619.616
1060	0.01	0.62	0	0.06	0.42	0.38	2.12	0.48	3.99	0.88	2.89	0.43	3.53	0.59	3.47	0.78	94.6	30.6	10303	0.06	0.02	1.89	1	1	16.4	0.69	7.39	8.32	12.058	3	0.00824524	610.09
1061	0	1.11	0	0.16	1.72	1.32	8.04	1.33	8.5	1.71	4.99	0.92	6.21	0.89	6.38	3.38	179	55.7	10488	0.06	0.02	2.54	1	1	36.9	1.27	20.91	14.72	11.5906	3	0.0188827	631.458
1062	0	1.25	0.01	0.21	1.57	1.73	9.77	1.98	11.9	2.51	7.1	1.01	7.37	1.24	8.85	2.25	255	82.1	10534	0.09	0.03	1.72	1	1	47.65	1.47	26.95	19.23	13.0816	3	0.00882353	603.487
1063	0	0.82	0	0.03	0.41	0.44	3.37	0.68	4.18	1.07	3.5	0.49	3.71	0.71	3.67	0.88	99.5	35.2	11270	0.04	0.04	3.47	1	1	19.41	0.85	9.08	9.48	11.1529	1	0.00884422	655.163
1064	0	0.81	0	0.19	0.39	0.39	2.14	0.34	2.71	0.6	2.15	0.31	2.48	0.45	2.99	0.85	81.7	22.1	11503	0.08	0.04	2.03	1	1	12.96	1	5.97	5.99	5.99	2	0.0104039	615.162
1065	0	1.81	0.01	0.17	0.98	1.09	5.46	1.09	7.06	1.45	3.96	0.69	4.73	0.81	6.58	2.83	188	51.9	11058	0.07	0.03	5.39	1	1	29.31	1.99	15.68	11.64	5.84925	2.33333	0.0150532	690.819
1066	0.01	1.27	0.02	0.2	0.76	0.57	3.93	0.71	4.59	0.98	3.17	0.45	3.77	0.53	6.02	3.15	164	32.6	11230	0.07	0.03	4.04	1	1	20.96	1.5	10.56	8.9	5.93333	2.33333	0.0192073	667.175
1067	0	1.49	0.01	0.12	1	1.01	5.95	1.41	10.3	2.2	6.47	0.92	5.61	1.07	10.3	2.25	276	68.1	9966	0.11	0.03	2.12	1	1	37.56	1.62	19.67	16.27	10.0432	3.66667	0.00815217	618.271
1068	0	3.57	0	0.05	0.98	1.12	7.61	1.43	8.93	1.98	5.97	0.78	5.99	1	24	22.4	641	67.4	10669	0.24	0.06	6.15	1	1	39.41	3.62	20.07	15.72	4.34254	4	0.0349454	702.039
1069	0.01	0.87	0	0.04	0.36	0.32	2.09	0.48	3.47	0.7	2.43	0.38	3.09	0.43	3.93	1.53	109	26.3	11436	0.01	0.04	2.02	1	1	14.67	0.92	6.72	7.03	7.6413	0.25	0.0140367	614.81
1070	0	0.83	0.01	0.12	0.39	0.47	2.54	0.51	3.87	0.85	3.34	0.58	5.4	1	4.86	3.54	126	31.9	10739	0.08	0.03	2.57	1	1	19.91	0.96	7.78	11.17	11.6354	2.66667	0.0280952	632.328
1071	0	0.61	0	0	0.08	0.14	1.25	0.3	1.82	0.44	1.44	0.24	2.12	0.35	2.43	0.67	59.5	15.8	11180	0.04	0	1.95	1	1	8.79	0.61	3.59	4.59	7.52459	0	0.0112605	612.301
1072	0	0.73	0	0	0.38	0.28	2.12	0.5	3.27	0.74	2.6	0.4	2.47	0.4	3.9	1.09	100	26.3	11011	0.05	0.02	2.42	1	1	13.89	0.73	6.55	6.61	9.05479	2.5	0.0109	627.889
1073	0	1.35	0.01	0.18	0.36	0.23	2.87	0.69	4.96	1.38	4.99	0.89	6.94	1.19	4.86	14.2	119	57.6	11354	0.21	0.27	1.75	1	1	26.04	1.54	9.11	15.39	9.99351	0.777778	0.119328	604.691
1074	0	1.22	0.01	0.01	0.97	1.23	8.66	1.74	12.2	2.83	7.93	1.11	7.92	1.57	7.2	5.94	193	91.6	10409	0.04	0.02	4.03	1	1	47.4	1.24	24.8	21.36	17.2258	2	0.0307772	666.977
1075	0.01	2.57	0.01	0.18	0.76	0.99	7.21	1.58	10.5	2.77	7.67	1.04	7.91	1.36	10.3	27	279	83.6	10494	0.18	0.03	5.87	1	1	44.56	2.77	21.04	20.75	7.49097	6	0.0967742	698.046
1076	0	1.58	0	0.07	0.59	0.67	4.71	1.25	8.55	2.1	6.52	0.93	6.67	1.21	6.7	15.9	176	65.4	10254	0.11	0.02	3.64	1	1	34.85	1.65	15.77	17.43	10.5636	5.5	0.0903409	658.907
1077	0	0.97	0	0.1	0.34	0.54	2.4	0.61	3.64	0.85	2.37	0.39	2.43	0.42	3.51	0.99	96.6	27.7	10690	0.14	0.04	2.16	1	1	15.06	1.07	7.53	6.46	6.03738	3.5	0.0102484	619.616
1078	0	0.65	0.01	0.07	0.88	1.05	7.24	1.75	12.3	2.72	8.12	1.26	8.77	1.47	3.93	0.45	99.9	91.7	9513	0.04	0	2.34	1	1	46.29	0.73	23.22	22.34	30.6027	0	0.0045045	625.426
1079	0	1.1	0.01	0.12	0.38	0.51	3.73	0.74	6.25	1.52	5	0.71	5.77	0.9	4.88	10.3	127	50.2	10568	0.09	0.02	1.21	1	1	26.74	1.23	11.61	13.9	11.3008	4.5	0.0811024	579.696
1080	0	0.94	0.01	0.11	0.7	0.83	5.18	1.3	9.32	2.55	7.53	1.26	8.63	1.57	3.46	3.02	91.3	81.3	10093	0.09	0.03	1.9	1	1	39.93	1.06	17.33	21.54	20.3208	3	0.0330778	610.462
1081	0	0.81	0.01	0.04	0.33	0.46	2.42	0.76	5.14	1.37	3.82	0.59	4.88	0.86	3.43	0.72	91.1	42.7	10523	0.08	0.01	3.23	1	1	21.49	0.86	9.11	11.52	13.3953	8	0.0079034	649.608
1082	0	1.06	0.02	0.1	0.55	0.71	3.64	0.86	5.07	1.22	3.35	0.42	3.86	0.69	3.64	2.27	99.2	38	10246	0.12	0.03	2.64	1	1	21.55	1.18	10.83	9.54	8.08475	4	0.0228831	634.326
1083	0	0.92	0	0.33	0.55	0.69	5.02	1.2	9.34	2.13	7.4	1.2	8.72	1.43	3.53	4.8	92.6	74.3	10514	0.08	0.02	2.13	1	1	38.93	1.25	16.8	20.88	16.704	4	0.0518359	618.609
1084	0.02	0.7	0.02	0.13	0.31	0.34	1.73	0.32	2.36	0.65	1.96	0.29	2.3	0.41	2.04	0.47	53.6	20.1	10058	0.06	0	4.82	1	1	11.54	0.87	5.06	5.61	6.44828	0	0.00876866	681.513
1085	0	0.84	0	0.1	0.4	0.46	2.43	0.56	4.48	1	3.07	0.48	3.43	0.56	3.31	0.76	88.6	31.3	10390	0.14	0.05	2.65	1	1	17.81	0.94	8.33	8.54	9.08511	2.8	0.00857788	634.608
1086	0.01	0.65	0	0	0.36	0.33	2.41	0.64	4.76	1.22	4.33	0.59	4.41	0.95	3.76	4.4	98.3	41.1	11239	0.09	0.04	1.17	1	1	20.66	0.66	8.5	11.5	17.4242	2.25	0.0447609	577.489
1087	0	1.36	0	0.11	0.56	0.79	4.38	0.99	6.37	1.3	3.45	0.52	3.16	0.6	5.67	5.15	149	40.5	11039	0.11	0.04	11.3	1	1	23.59	1.47	13.09	9.03	6.14286	2.75	0.0345638	757.353
1088	0	1.12	0	0.14	1.01	0.88	5.94	1.11	8.9	1.96	5.76	0.96	7.34	1.19	4.03	1.26	107	61.9	10588	0.08	0.02	3.41	1	1	36.31	1.26	17.84	17.21	13.6587	4	0.0117757	653.805
1089	0	1.34	0.01	0.09	0.62	0.58	3.45	0.82	6	1.48	4.22	0.65	5.16	0.8	5.27	3.28	140	46.1	10255	0.09	0.03	3.67	1	1	25.22	1.44	11.47	12.31	8.54861	3	0.0234286	659.553
1090	0	1.83	0.01	0.15	1.09	1.34	8.15	1.55	10.9	2.58	7.45	1.14	8.71	1.44	6.88	2.35	176	79.7	10216	0.13	0.13	5.12	1	1	46.34	1.99	23.03	21.32	10.7136	1	0.0133523	686.518
1091	0	1.35	0.01	0.14	0.88	0.8	5.94	1.09	7.58	1.68	4.57	0.78	5.16	0.78	5.43	1.68	153	55.8	10772	0.06	0.01	2.94	1	1	30.76	1.5	16.29	12.97	8.64667	6	0.0109804	642.417
1092	0.01	4.49	0	0.3	1.55	2.17	14.4	2.94	24	6.04	16.6	2.47	16.9	2.78	19.2	3.68	525	179	9654	0.16	0.04	9.3	1	1	94.65	4.8	45.06	44.79	9.33125	4	0.00700952	738.971
1093	0.01	1.15	0.01	0.2	0.86	1.01	6.46	1.37	11.7	2.77	9.02	1.46	10.5	1.83	5.23	3.44	119	95.1	10413	0.04	0.01	3.8	1	1	48.35	1.37	21.4	25.58	18.6715	4	0.0289076	662.301
1094	0.02	2.39	0.01	0.15	0.79	1.11	6.7	1.5	12	3.07	8.48	1.34	9.46	1.67	8.13	20.3	204	93	10409	0.11	0.04	3.56	1	1	48.69	2.57	22.1	24.02	9.3463	2.75	0.0995098	657.164
1095	0	1.36	0.01	0.11	0.79	0.91	5.87	1.38	10.3	2.47	6.54	1.14	8.51	1.29	5.44	1.28	137	80.3	10112	0.16	0.07	3.29	1	1	40.68	1.48	19.25	19.95	13.4797	2.28571	0.00934307	651.028
1096	0.07	14	0.42	6.34	11.2	3.23	53	15.4	178	64.1	269	53.1	475	93	9.85	59.6	66.7	1809	7492	1.84	0.56	8.58	1	1	1235.86	20.83	260.83	954.2	45.8089	3.28571	0.893553	731.557
1097	0.02	37.6	0.06	1.22	2.42	0.45	13.4	4.95	61.2	25.3	120	26.3	255	54.8	15	72.5	101	764	10715	4.22	1.36	4.39	1	1	602.72	38.9	82.42	481.4	12.3753	3.10294	0.717822	673.869
1098	0.01	1.18	0.01	0.06	0.28	0.4	3.65	0.94	6.56	1.4	3.29	0.55	3.75	0.65	3	1.15	83.7	42.8	11121	0.12	0	16.2	1	1	22.73	1.26	11.83	9.64	7.65079	0	0.0137395	793.165
1099	0	1.2	0.01	0.02	0.35	0.34	2.62	0.71	6.02	1.46	4.34	0.77	5.69	1	3.78	1.44	105	45.7	10707	0.1	0.03	2.36	1	1	24.53	1.23	10.04	13.26	10.7805	3.33333	0.0137143	626.048
1100	0.1	1.15	0	0.02	0.51	0.59	5.78	1.64	10.7	2.05	5.67	0.88	6.75	1.14	2.51	0.54	66.3	68.8	10897	0.04	0.02	5.28	1	1	36.98	1.27	19.22	16.49	12.9843	2	0.0081448	689.089
1101	0.01	0.49	0	0.05	0.15	0.19	1.18	0.43	2.93	0.84	2.39	0.42	4.27	0.72	1.79	0.42	46.9	28.5	10986	0.08	0.1	1.02	1	1	14.07	0.55	4.88	8.64	15.7091	0.8	0.00895522	568.601
1102	0.03	1.11	0.02	0.31	0.34	0.39	2.61	0.58	4.06	1.03	3.5	0.66	5.22	0.87	2.28	1.67	57.3	33.6	9811	0.05	0.03	16.8	1	1	20.73	1.47	7.98	11.28	7.67347	1.66667	0.0291449	796.919
1103	0.01	1.21	0.01	0.13	0.39	0.42	4.5	1.09	7.13	1.65	4.44	0.65	5.09	0.81	2.57	0.8	67.4	51.5	12145	0.04	0.02	3.13	1	1	27.53	1.36	13.53	12.64	9.29412	2	0.0118694	647.191
1104	0.01	1.35	0.01	0.17	0.45	0.57	4.44	1.25	8.73	1.85	5.29	0.85	7.49	1.28	3.09	0.78	78.6	58.8	10126	0.22	0.02	6.94	1	1	33.74	1.54	15.44	16.76	10.8831	11	0.00992366	712.549
1105	0	1.05	0	0.03	0.3	0.3	2.43	0.76	5.74	1.21	3.93	0.56	4.14	0.77	3.78	1.43	101	42.3	10825	0.07	0.02	2.38	1	1	21.22	1.08	9.53	10.61	9.82407	3.5	0.0141584	626.666
1106	0.01	0.94	0	0.14	0.3	0.22	2.86	0.63	5.16	1.19	3.85	0.81	6.73	1.27	4.01	0.65	102	41.4	10876	0.15	0.07	3.19	1	1	24.11	1.09	9.17	13.85	12.7064	2.14286	0.00637255	648.649
1107	0	0.92	0	0.06	0.23	0.3	2.02	0.58	4.61	1.06	2.98	0.52	4.38	0.65	3.41	0.68	92.3	34	10729	0.15	0.05	3.19	1	1	18.31	0.98	7.74	9.59	9.78571	3	0.00736728	648.649
1108	0.01	0.92	0.01	0	0.51	0.49	4.04	1.28	10.9	2.73	9.58	1.77	13.8	2.43	3.36	6.5	66.6	105	11543	0.19	0.23	4.89	1	1	48.47	0.94	17.22	30.31	32.2447	0.826087	0.0975976	682.703
1109	0.08	19.6	0.04	0.48	0.5	0.23	3.55	1.65	27	15.7	115	39.2	524	148	130	200	1765	604	12987	20.5	14.7	24.3	1	1	895.03	20.2	32.93	841.9	41.6782	1.39456	0.113314	836.576
1110	0.05	21	0.09	1.68	2.82	1.35	17.9	5.9	72.9	28.6	133	28.6	273	56.5	8.52	32.6	87.7	858	9123	1.9	0.64	15.6	1	1	643.39	22.82	100.87	519.7	22.7739	2.96875	0.371722	789.296
1111	0.15	25.6	0.11	0.91	0.91	0.3	4.61	1.84	25.8	12.5	78.9	23.6	315	88.3	84.5	150	964	460	12795	11.9	6.77	17.7	1	1	578.53	26.77	33.46	518.3	19.3612	1.75775	0.155602	802.353
1112	0	45.8	0.03	0.83	2.23	0.52	13.8	4.91	65.9	27.3	133	29.7	287	58.6	17.2	118	146	872	10454	5.01	1.28	4.79	1	1	669.62	46.66	87.36	535.6	11.4788	3.91406	0.808219	680.998
1113	0.01	32.1	0.06	0.91	2.22	0.71	14.1	4.78	61.8	26.6	137	32.9	359	88.7	44	299	361	863	11711	3.61	0.86	7.47	1	1	760.89	33.08	83.61	644.2	19.474	4.19767	0.828255	719.061
1114	0.01	14.4	0.02	0.22	0.72	0.14	3.96	1.6	21.1	9.1	47.8	11.9	130	31	20.1	45.4	198	302	11946	3.7	1.57	3.23	1	1	271.97	14.65	27.52	229.8	15.686	2.35669	0.229293	649.608
1115	0.1	34.3	0.2	1.94	3.25	0.5	16.8	5.96	75	30.5	144	31.4	291	59.1	18.9	94.6	135	910	9735	4.05	1.46	25.4	1	1	694.05	36.54	101.51	556	15.2162	2.77397	0.700741	841.531
1116	0.01	85.5	0.2	1.21	3.35	0.69	23.5	9	117	49	238	52.4	496	99.5	36.7	300	246	1547	9033	9.27	2.44	6.99	1	1	1175.36	86.92	153.54	934.9	10.7559	3.79918	1.21951	713.181
1117	0	35.2	0.03	0.7	2.06	0.45	14.9	5.75	80.2	34.2	169	38.4	373	78	26.9	93.2	200	1033	11016	10.7	3.54	4.74	1	1	831.89	35.93	103.36	692.6	19.2764	3.0226	0.466	680.135
1118	0.16	77.2	0.21	2.72	6.12	1.08	32.9	12.3	155	64.2	306	66.9	629	124	37.5	249	225	2015	9233	8.42	2.02	13.3	1	1	1477.79	80.29	207.4	1190.1	14.8225	4.16832	1.10667	773.252
1119	0.01	18.7	0.02	0.17	0.53	0.18	4.71	2.13	32.1	15.3	85.8	23.3	268	67.7	53	103	427	504	12813	6.98	4.25	10.2	1	1	518.65	18.9	39.65	460.1	24.3439	1.64235	0.241218	747.605
1120	0.01	143	0.1	1.77	4.07	0.7	26.1	10.1	138	61.2	324	75.7	756	160	83.1	729	454	2133	9340	17.7	3.42	30.4	1	1	1700.75	144.88	178.97	1376.9	9.50373	5.17544	1.60573	862.105
1121	0.03	80.3	0.24	4.78	8.79	4.41	45.4	14	160	60.1	267	54.4	501	100	16.9	129	88.8	1759	7456	3.05	0.71	8.99	1	1	1300.45	85.35	232.6	982.5	11.5114	4.29577	1.4527	735.838
1122	0.03	29.6	0.08	1.28	3.94	0.1	28.9	11.6	154	60.9	282	58.5	525	101	59.8	208	395	1810	12275	18.6	4.92	12.6	1	1	1256.93	30.99	198.54	1027.4	33.1526	3.78049	0.526582	767.923
1123	0.062227	30.6014	0.199927	1.7023	6.4011	1.91984	37.494	12.613	191.852	75.4117	413.14	87.5341	1088.4	186.053	54.2121	106.162	138.954	2854.9	28047.7	2.80102	1.47675	12.0392	1	0.5	2133.38	32.5659	250.28	1850.54	56.8245	1.89674	0.764006	835.555
1124	0.617216	116.04	0.706728	8.36549	17.9253	2.57035	116.029	41.734	40.8	214.952	1117.03	210.544	2397.06	358.796	646.594	1397.5	1194.59	7831.37	32535.9	29.001	9.98545	11.3832	1	0.5	4643.17	125.73	219.059	4298.38	34.1874	2.90433	1.16986	829.359
1125	0.0601245	91.3922	0.0445332	2.80782	8.17993	2.28028	65.3481	25.5997	394.715	148.936	799.503	158.365	1932.61	307.42	283.126	606.092	735.875	5663.9	32568.5	22.1892	6.60479	3.78061	1	0.5	3937.27	94.3047	496.123	3346.84	35.4896	3.35957	0.823635	720.144
1126	3.13303	78.1698	1.74262	16.1783	12.4742	3.0262	67.8615	22.5261	346.445	128.612	680.991	136.318	1607.57	255.865	147.685	312.333	294.592	4758.31	30130.7	8.43058	2.97179	22.571	1	0.5	3360.92	99.2237	452.333	2809.36	28.3134	2.83687	1.06022	910.16
1127	0.159128	72.3539	0.482835	5.91937	10.2613	2.71972	68.439	23.1106	341.182	124.195	654.746	131.08	1564.08	245.116	164.719	421.915	365.417	4679.48	29653	7.78646	2.52886	22.6864	1	0.5	3243.84	78.9152	445.712	2719.22	34.4575	3.07904	1.15461	910.806
1128	0.053371	33.7074	0.0659741	1.16167	3.20779	0.595543	22.3273	7.33594	112.589	40.9985	235.344	48.0554	577.535	96.3227	108.125	235.937	377.893	1638.31	35878.2	6.31072	2.35967	12.3991	1	0.5	1179.3	34.9884	146.056	998.255	28.531	2.67441	0.624349	838.841
1129	0.261145	143.124	0.469123	6.99708	13.7094	2.56813	96.8187	34.3561	492.61	176.18	943.749	188.916	2230.5	347.36	626.723	1601.83	1421.65	6828.73	36046.8	42.0432	13.0467	22.7972	1	0.5	4677.61	150.851	640.063	3886.7	25.7651	3.22251	1.12674	911.424
1130	0.260376	129.558	1.9361	31.9048	50.5928	11.195	231.686	68.3427	40.8	291.545	1410.59	257.779	2878.62	436.275	328.788	796.11	577.628	516.63	29008.3	12.5001	3.31648	15.1643	1	0.5	5841.09	163.659	402.617	5274.82	32.2305	3.76908	1.37824	861.83
1131	0.216289	191.868	0.317301	6.27775	20.3235	3.92825	139.318	50.0754	40.8	256.733	1314.68	253.568	2914.52	437.93	34.03	52.41	2422.85	516.63	36215.3	67.4857	20.2011	31.784	1	0.5	5630.56	198.68	254.445	5177.43	26.0592	3.34069	0.0216315	955.175
1132	0.175881	165.537	0.673813	13.4021	24.5865	4.03378	127.088	41.941	589.805	196.932	1014.76	194.568	2245.15	344.388	442.413	1165	1045.67	7437.13	31453	20.3565	7.15261	19.5696	1	0.5	4963.04	179.789	787.454	3995.8	22.225	2.84602	1.11413	892.355
1133	0.164373	77.3157	0.512872	8.40161	12.8328	3.97903	87.6156	26.8917	409.755	147.434	818.467	158.977	1836.42	294.703	147.468	365.247	333.814	5626.88	29767.4	9.28792	3.15074	3.20188	1	0.5	3883.47	86.3946	541.075	3256	37.6875	2.94785	1.09416	705.53
1134	1.14748	76.1031	0.375912	5.09003	9.05736	1.71498	59.0674	23.8454	366.946	147.575	851.134	175.368	2164.71	347.095	653.588	1260.67	1952.84	5774.87	37032.2	36.4331	11.5105	10.8415	1	0.5	4229.23	82.7165	460.631	3685.88	44.5604	3.16521	0.64556	824.022
1135	0.093264	64.0747	0.910196	14.5087	26.4271	4.34733	133.96	41.3766	584.317	202.214	999.965	185.469	2101.58	326.968	223.589	538.972	538.671	7189.63	29218.9	8.74907	2.86746	7.97744	1	0.5	4686.21	79.5868	790.427	3816.19	47.9501	3.05115	1.00056	791.599
1136	2.35336	105.647	1.95032	12.9548	14.279	3.4318	75.7281	27.2639	400.448	151.986	802.726	159.561	1945.61	318.235	354.493	778.219	939.146	5715.6	32381.9	26.0112	8.28098	13.6493	1	0.5	4022.18	122.905	521.15	3378.12	27.4856	3.14108	0.828646	849.694
1137	0	57.6102	0.0400278	1.63991	3.55379	1.21798	37.8749	13.5512	209.547	81.6677	437.18	89.6826	1101.09	177.674	168.433	462.166	756.354	3070.87	35698.9	15.7552	6.11278	10.0615	1	0.5	2212.33	59.2901	265.745	1887.29	31.8315	2.57742	0.611045	815.95
1138	0.0807683	32.9362	0.0239428	0.703748	1.82397	0.828933	9.58477	3.88469	69.677	28.8564	167.536	40.3657	548.869	103.684	144.215	327.806	1433.98	1163.96	43581.9	12.0675	6.41046	4.11272	1	0.5	1008.85	33.7446	85.7993	889.31	26.3541	1.88247	0.228599	727.717
1139	0.0486347	27.7764	0.0240271	1.20074	4.32534	0.769285	18.7065	7.68769	112.947	45.3121	246.007	52.0689	638.118	107.683	87.6066	244.696	699.98	1712.94	36601.8	9.06087	5.26952	15.0405	1	0.5	1262.67	29.0498	144.435	1089.19	37.4938	1.71949	0.349575	860.876
1140	0.163912	73.8453	0.199791	4.69758	11.2524	1.50473	54.6773	20.5878	314.66	118.162	646.269	126.35	1561.65	249.216	192.297	441.499	497.877	4519.68	33258.3	10.8747	4.07751	18.3864	1	0.5	3183.23	78.9066	402.682	2701.65	34.2385	2.66701	0.886763	884.739
1141	0	29.4039	0.0692471	2.30353	2.86564	1.5633	24.8536	9.72453	136.952	51.3128	267.267	54.8926	679.548	116.522	66.527	184.542	298.983	1892.73	29399.4	5.68325	1.98542	11.3281	1	0.5	1377.28	31.7767	175.959	1169.54	36.805	2.8625	0.617234	828.825
1142	0.026395	26.4668	0.117333	2.7606	7.57585	1.0145	32.7342	10.1455	150.626	51.4913	283.234	53.9783	696.347	111.591	44.1448	177.772	613.118	2002.59	32098.4	6.73381	3.94849	45.8958	1	0.5	1428.11	29.3711	202.096	1196.64	40.7421	1.70541	0.289947	1007.47
1143	0.0662678	38.8553	0	3.46564	6.96054	1.6975	40.0715	14.9978	217.545	86.9206	475.946	98.4186	1225.48	206.709	71.5298	161.762	324.674	3250.17	29847	7.82587	2.74211	12.4813	1	0.5	2417.13	42.3872	281.272	2093.47	49.3892	2.85396	0.498228	839.581
1144	0.429325	193.275	0.516397	10.2587	20.2083	4.56729	130.028	46.1451	40.8	240.008	1261.46	240.03	2816.84	460.096	918.341	52.41	2211.15	516.63	34220.9	61.1326	14.2181	22.7296	1	0.5	5464.66	204.479	241.748	5018.44	24.5425	4.29965	0.0237026	911.048
1145	0	33.5893	0.0315778	0.0429026	1.96265	0.735968	10.2783	2.81279	42.0304	16.0839	81.0816	17.3578	240.242	49.0021	40.3983	123.774	333.867	610.631	34762.9	2.91241	0.916388	3.89396	1	0.5	495.251	33.6638	57.8201	403.767	11.9941	3.17814	0.370728	722.788
1146	0.0995161	92.3762	0.639898	9.53265	12.8832	3.25566	78.331	25.0625	356.225	122.321	636.303	120.227	1421.66	230.169	274.608	625.348	665.579	4616.53	35527.5	11.7002	4.70366	2.88087	1	0.5	3109.08	102.648	475.757	2530.67	24.6538	2.48746	0.939555	696.46
1147	0.0534003	26.2067	0.0395394	0.232846	2.27431	0.432113	15.3085	6.44097	116.702	47.5198	280.152	62.4438	833.729	140.073	149.532	249.5	642.436	1892.73	39984.7	13.1254	8.29759	3.09155	1	0.5	1531.61	26.5324	141.158	1363.92	51.4056	1.58183	0.388366	702.501
1148	0.0403954	91.4734	0.189411	4.81497	10.7303	2.44185	74.6624	29.4978	458.537	172.028	911.422	183.972	2211.24	352.012	289.723	654.872	782.907	6485.8	31913.4	25.0577	8.10747	31.245	1	0.5	4503.06	96.5182	575.87	3830.67	39.6886	3.09069	0.836463	952.844
1149	0	69.1688	0.127443	2.62767	8.09982	1.2088	49.8267	19.8229	289.913	110.803	610.31	121.731	1483.75	237.884	446.433	1289.36	1429.08	4309.04	34331.3	26.7208	9.23023	12.0919	1	0.5	3005.27	71.924	368.871	2564.47	35.6554	2.89492	0.902231	836.042
1150	0.0363113	52.2742	0.0537613	1.62477	5.87099	0.679815	39.1347	16.82	282.698	117.502	671.626	141.714	1789.48	290.3	220.406	456.952	835.408	4531.68	35042.6	32.622	9.31697	7.00464	1	0.5	3409.82	53.989	345.204	3010.62	55.7636	3.50136	0.546981	778.424
1151	0.0361053	73.4055	0.0890908	1.82897	5.83674	1.25955	41.1614	16.2965	247.106	94.0272	514.741	103.547	1287.42	202.482	354.53	868.266	1198.13	3602.26	36988.9	28.2397	8.33397	5.24595	1	0.5	2589.24	75.3596	311.66	2202.22	29.2228	3.38851	0.724683	750.272
1152	0.0352102	126.293	0.256632	4.14601	11.5261	3.16009	80.709	29.9513	447.854	162.035	859.486	167.753	2023.97	317.269	595.624	1633.54	1323	6237.13	34045.6	31.5662	9.97057	3.52233	1	0.5	4234.44	130.731	573.2	3530.51	27.0059	3.16594	1.23472	713.867
1153	0	48.4863	0.0472999	1.16187	7.05929	0.692414	44.6377	19.7697	321.135	132.512	761.408	158.929	1943.9	317.374	473.801	1067.51	2346.09	5180.57	41377.7	63.7583	26.3521	14.9914	1	0.5	3757.12	49.6955	393.294	3314.13	66.6887	2.41947	0.455017	860.496
1154	0.0168974	8.57541	0	0	0.260452	0.0433993	0.9455	0.533194	11.2148	4.89946	34.92	8.4749	129.747	28.5243	11.1796	12.7933	181.65	252.978	37918.8	3.62395	1.13004	3.92133	1	0.5	228.156	8.5923	12.9974	206.566	24.0408	3.20691	0.0704279	723.417
1155	0.00689934	0.105956	0.0132122	0	0.459135	0.0702651	1.40158	0.405932	7.7679	2.84047	11.2026	2.11836	15.0772	2.77484	0.691303	0.249466	45.8185	100.811	12590.2	2.64	1.11	2.23217	1	0.5	44.2444	0.126068	10.1048	34.0135	269.803	2.37838	0.00544465	675.234
1156	0.011825	0.0681009	0	0.191159	0.250376	0	0.180167	0.10342	1.33135	0.731167	2.97017	0.772866	8.11819	1.3899	1.89314	0.433112	8.92548	29.104	13153.4	2.88	1.62	2.86935	1	0.5	16.1187	0.271085	1.86531	13.9823	51.579	1.77778	0.0485253	696.119
1157	0.00583234	0.223926	0.0223384	0	0.31251	0	0.296208	0.306055	3.79399	1.21427	5.91215	1.11699	10.264	1.52799	3.49277	0.238886	27.0197	45.9943	12766.1	3.06	1.32	3.77393	1	0.5	24.9962	0.252097	4.70876	20.0354	79.4749	2.31818	0.00884119	719.986
1158	0	0	0	0	0	0.0474382	0	0.466638	5.94358	2.75623	11.4701	1.99656	19.052	3.22565	0.822659	0.220136	26.1286	86.1376	12871.3	1.77	0.84	4.52104	1	0.5	44.9583	0	6.45766	38.5006	0	2.10714	0.00842508	736.371
1159	0	0.0841806	0	0	0	0.0595461	1.51441	0.962288	15.1957	4.55045	18.8432	4.30216	36.2969	5.77546	0.687951	0.393761	32.1551	171.105	12577.6	1.88	1.77	7.09377	1	0.5	87.5843	0.0841806	17.732	69.7682	828.791	1.06215	0.0122457	779.691
1160	0	0.0408573	0	0	0	0	0.10809	0.186143	2.46281	1.36598	6.96878	2.00572	15.1262	2.03446	0.16169	0.209554	12.4894	60.5785	13157.6	1.07	1.04	3.44295	1	0.5	30.299	0.0408573	2.75704	27.5011	673.101	1.02885	0.0167785	711.862
1161	0	0.0702768	0	0	0	0	0.371841	0.349281	3.34314	1.73066	6.43667	1.5469	16.3542	2.14629	0.774191	0.213382	22.6832	58.7486	12687.5	2.24	0.77	2.36882	1	0.5	32.3492	0.0702768	4.06426	28.2147	401.48	2.90909	0.00940708	680.094
1162	0	0.344429	0	0	0	0.222572	1.99783	0.493816	4.81853	1.33328	5.02539	1.08862	6.96777	1.24097	2.99714	1.98548	100.484	46.7199	13394.9	2.75	0.65	3.03024	1	0.5	23.5332	0.344429	7.53275	15.656	45.455	4.23077	0.0197591	700.778
1163	0.018	0.373225	0	0	0.244181	0.244453	1.75537	0.938936	9.00802	2.67145	11.595	1.92631	18.4512	2.77367	3.57023	0.436729	49.5909	98.2456	12884.9	1.09	1.88	1.16484	1	0.5	49.9998	0.391225	12.191	37.4177	95.6424	0.579787	0.00880663	625.103
1164	0.0140235	0.341741	0	0.411111	0.33	0.17267	1.29156	0.34374	5.2493	1.33363	5.70336	1.12099	9.83617	1.20647	3.29017	1.20302	80.8027	51.96	13220.1	1.87	2.01	4.11393	1	0.5	27.3548	0.766876	7.38727	19.2006	25.0375	0.930348	0.0148883	727.744
1165	0	55.0371	0.0815084	1.61477	5.68625	1.32238	44.469	16.5686	251.191	98.9691	501.675	103.912	1214.48	204.668	347.568	719.122	1076.89	3530.68	34623.3	20.6601	8.34704	4.6849	1	0.5	2499.67	56.7334	319.237	2123.7	37.4331	2.47515	0.667777	739.664
1166	0	4.46042	0	0	0.10538	0.138888	5.11604	2.65634	47.6575	17.2686	103.964	21.8264	302.914	54.2262	72.195	93.8991	1000.73	692.977	46514.9	7.42031	6.78097	3.9856	1	0.5	560.334	4.46042	55.6742	500.199	112.142	1.09428	0.0938309	724.88
1167	0.0968318	20.8846	0.103076	1.28256	1.72385	0.371356	19.2958	6.90168	104.143	39.0705	205.516	42.2751	502.141	83.3692	93.6855	150.179	437.138	1464.66	35498.3	10.1074	3.61113	3.89909	1	0.5	1027.17	22.367	132.436	872.372	39.0025	2.79895	0.343551	722.906
1168	0.0543595	11.4141	0.0433903	0.516407	2.43859	0.435275	14.2177	6.09945	83.8477	35.8003	176.531	39.3381	394.39	84.5895	59.6664	112.747	574.857	1101.12	12872	4.16407	2.0186	3.99519	1	0.5	849.715	12.0283	107.039	730.648	60.7441	2.06285	0.19613	725.096
1169	0.00824366	43.1606	0.136596	2.1778	5.27775	1.22129	27.7933	9.96711	121.683	48.1627	223.037	48.6155	453.076	90.0291	49.4269	72.5924	230.898	1473.2	10839.8	5.57965	2.15351	5.02481	1	0.5	1074.35	45.4833	165.943	862.921	18.9723	2.59096	0.314391	746.207
1170	0.249945	28.0863	0.153557	1.45221	3.73899	0.553802	24.6294	9.94632	131.755	53.4905	255.284	57.7785	545.288	103.802	188.06	380.132	391.585	1647.37	12981.6	13.8291	5.1403	3.65016	1	0.5	1216.21	29.942	170.623	1015.64	33.9204	2.69033	0.970752	717.019
1171	0.428508	48.9729	0.295414	3.44476	6.28789	1.25948	37.1284	12.8658	157.957	63.7792	288.947	62.3603	589.295	122.295	169.343	306.116	431.144	1900.99	11175.9	8.83017	4.73274	7.86231	1	0.5	1395.32	53.1416	215.499	1126.68	21.2014	1.86576	0.710009	790.11
1172	0.02065	18.1833	0.0184245	0.760144	1.43547	0.283152	8.41112	3.29166	42.8873	19.5391	95.0424	23.7387	252.041	54.9351	189.55	339.064	384.902	601.115	14079.8	4.59814	1.68585	2.98265	1	0.5	520.587	18.9826	56.3087	445.296	23.4582	2.72749	0.880908	699.422
1173	0	31.9607	0.0337861	0.876698	3.26471	0.536935	28.4066	11.5144	152.516	62.2772	296.315	67.8297	654.706	120.731	113.92	180.074	282.849	1890.2	13126.3	14.8946	5.97925	5.60193	1	0.5	1430.97	32.8712	196.239	1201.86	36.5627	2.49106	0.636644	756.532
1174	0	10.0061	0.0802813	1.96102	4.35264	0.27782	25.6045	8.83726	108.437	43.7608	199.657	42.6343	394.544	82.0011	192.872	358.546	374.844	1291.28	15021.3	2.96977	2.9458	6.19078	1	0.5	922.154	12.0474	147.509	762.597	63.2998	1.00814	0.956522	766.21
1175	0.0205511	32.5114	0.0650708	1.43348	3.67266	0.630562	28.1124	10.9636	147.956	61.4875	299.765	67.1573	649.046	135.157	130.678	232.468	253.857	1906.72	12750.2	12.6137	4.87102	7.29971	1	0.5	1437.98	34.0304	191.335	1212.61	35.6331	2.58953	0.915741	782.569
1176	0	14.2079	0.0415202	0.454685	1.71326	0.331855	13.1043	5.13841	68.1986	29.7281	147.259	33.9812	327.911	70.204	39.2294	70.5357	65.0437	916.719	13237.2	6.61587	2.78098	4.07768	1	0.5	712.273	14.7041	88.4864	609.082	41.4226	2.37897	1.08444	726.942
1177	0.112943	26.1856	0.0977148	1.05953	3.14382	0.624155	27.2063	11.5792	162.191	68.4267	331.136	75.0352	694.437	135.936	85.5796	161.049	113.287	2091.52	14173.4	27.6678	8.99852	13.0992	1	0.5	1537.17	27.4558	204.744	1304.97	47.5299	3.0747	1.4216	845.02
1178	0.0105	0.340219	0	0	0.42	0.0998671	0.995203	0.88001	12.587	5.19812	22.9309	4.2777	58.6102	12.9223	3.61892	1.10953	113.255	211.749	39948	1.73261	1.84503	5.31307	1	0.5	119.272	0.350719	14.9821	103.939	296.361	0.939069	0.00979672	751.478
1179	0.0282248	0.739378	0.0626203	0	0.428475	0.225552	2.88587	1.42206	16.1692	4.92199	19.4347	3.01852	29.9231	4.37203	7.12823	1.87696	268.987	211.383	40101.9	2.41583	2.55941	7.34391	1	0.5	83.6317	0.830223	21.1311	61.6704	74.2817	0.943899	0.0069779	783.178
1180	0	0	0	0.116764	0.410114	0.108241	3.15005	1.12842	13.2671	4.48358	16.3611	2.8044	25.1641	4.22896	5.17318	6.40734	209.434	163.004	38553.3	1.1013	0.68237	9.9629	1	0.5	71.2228	0.116764	18.0639	53.0421	454.268	1.61393	0.0305936	814.894
1181	0.0225	0.693854	0	0	0.804122	0.424706	8.21064	3.80041	47.3175	11.5753	44.8745	7.37749	75.2581	9.20013	4.17801	2.04146	172.982	492.739	38490	0.600171	0.683533	9.78328	1	0.5	209.559	0.716354	60.5573	148.286	207	0.878042	0.0118016	812.949
1182	0	0.108545	0	0	0	0.052919	0.220567	0.317852	3.1291	1.23084	4.69088	0.828875	9.49518	1.43237	1.99943	0.150802	33.7274	41.0188	14594.1	1.65	0.95	4.88467	1	0.5	21.5071	0.108545	3.72044	17.6781	162.865	1.73684	0.0044712	743.555
1183	0.005465	0.132953	0	0.213997	0.291686	0.0707127	1.04791	0.584559	6.89121	1.5272	6.06585	0.692795	5.22774	0.950548	1.00901	0.139134	57.6527	62.3007	13845.5	2.06	1.28	2.17567	1	0.5	23.7026	0.352415	8.88608	14.4641	41.0429	1.60938	0.00241332	673.152
1184	0	0.191826	0	0	0	0.201433	0.479746	0.613294	8.08227	2.56964	9.47901	2.02547	17.8562	2.88554	2.07861	0.310433	58.7549	95.148	13217.7	3.17	1.05	6.64032	1	0.5	44.3844	0.191826	9.37675	34.8158	181.497	3.01905	0.00528353	773.107
1185	0	0.257228	0	0	0	0.182412	1.0137	0.388766	7.56512	1.96981	5.9461	1.28746	11.1371	1.8722	1.68494	0.371294	67.0205	64.723	13604.4	0.95	1.74	6.31397	1	0.5	31.6199	0.257228	9.15001	22.2127	86.3541	0.545977	0.00554	768.14
1186	0.00467887	0.220447	0	0	0.35	0.107477	1.99092	0.763537	6.17849	1.78554	5.61364	0.859013	7.32075	1.1584	2.07667	0.393776	74.5535	58.7248	13307.7	1.04	0.75	6.61371	1	0.5	26.3529	0.225126	9.39042	16.7373	74.3465	1.38667	0.00528179	772.71
1187	0	0.183659	0	0	0	0.0358156	0.796156	0.624549	5.05913	1.48756	6.14473	1.399	11.6031	2.29019	2.71788	0.422834	84.1189	51.7765	15731.7	2.33	0.85	1.65297	1	0.5	29.6239	0.183659	6.51565	22.9245	124.821	2.74118	0.00502662	651.402
1188	0.007462	0.136569	0.0253949	0	0.411966	0.0332907	1.11004	0.438612	4.97588	1.23059	3.80767	0.566495	5.55845	0.677317	1.17714	0.36592	68.8239	47.1159	13461.6	1.08	0.91	3.07288	1	0.5	18.9797	0.169426	6.96979	11.8405	69.8861	1.18681	0.00531676	701.979
1189	0	0.197045	0	0	0	0.0698665	1.06772	0.460243	5.45078	2.40848	9.82897	2.98576	27.2485	4.86104	2.00504	0.632837	51.4662	87.7338	15402.3	2.15	0.61	1.61221	1	0.5	54.5784	0.197045	7.04861	47.3328	240.213	3.52459	0.0122962	649.475
1190	0.0046	0.201997	0	0	0.27082	0.131308	0.45607	0.419773	4.04377	1.33613	5.70695	0.820965	9.24394	1.46693	1.31754	0.293997	48.5103	56.7293	14044.5	2.24	0.73	3.03002	1	0.5	24.1033	0.206597	5.32175	18.5749	89.9091	3.06849	0.00606051	700.772
1191	0	0.216478	0	0	0	0.0301541	0.754092	0.350548	4.75469	1.51542	4.27668	0.688048	5.03472	0.54777	1.41415	0.122756	48.8513	44.1801	13592.8	1.17	1.24	1.39168	1	0.5	18.1686	0.216478	5.88948	12.0626	55.7222	0.943548	0.00251285	638.283
1192	0.0157	0.136548	0	0.134308	0.244096	0.207114	1.39761	0.642053	6.6092	1.67127	5.24534	1.41889	10.9862	1.67692	1.31462	0.240896	65.2475	57.755	13210	1.25	2.07	2.73103	1	0.5	30.3853	0.286555	9.10008	20.9986	73.2795	0.603865	0.00369204	691.937
1193	0.024	0.25111	0	0	0.384765	0.209873	1.03672	0.722899	6.0516	1.91768	4.21406	0.793619	7.08961	1.11831	2.88648	0.740461	104.403	51.8084	15221.1	1.39	2.02	3.22865	1	0.5	23.8143	0.27511	8.40586	15.1333	55.0081	0.688119	0.00709231	706.252
1194	0.0094	0.321721	0	0	0.258803	0.596035	3.57382	1.03327	14.5819	4.58635	13.9576	3.17865	20.4822	3.68135	1.53744	0.510823	88.998	139.34	12832.6	2.11	1.14	4.34336	1	0.5	66.2611	0.331121	20.0438	45.8862	138.578	1.85088	0.00573972	732.687
1195	0	0.254208	0.0270114	0.321486	0	0.283282	1.57427	0.480256	8.72414	2.73555	7.81667	1.5201	12.0011	2.41864	1.56643	0.324342	69.4054	86.6074	13458.6	2.36	1.36	1.63425	1	0.5	38.1567	0.602706	11.062	26.4921	43.9552	1.73529	0.00467316	650.522
1196	0.1055	0.647211	0	0	0.464851	0.0901546	1.24883	1.11792	11.5131	3.24831	10.8013	2.11813	14.9965	2.19452	2.67104	0.614741	169.973	109.626	12984.2	3.25	2.16	6.24111	1	0.5	48.5463	0.752711	14.4348	33.3588	44.3182	1.50463	0.0036167	767.002
1197	0	0.373522	0	0	0.250388	0.121404	2.10836	0.905604	9.97024	2.82373	9.40762	1.43202	13.4631	1.94073	1.78301	0.611607	98.4372	93.4315	13452.3	4.01	1.67	9.80524	1	0.5	42.7967	0.373522	13.356	29.0672	77.8193	2.4012	0.00621317	813.189
1198	0.0047	0.314885	0	0	0.0974219	0.11809	1.18127	0.585734	5.85763	1.97169	5.78086	1.07781	8.2988	1.40425	1.94636	0.509582	94.9625	60.3462	14026.6	2.69	1.54	1.09001	1	0.5	26.6931	0.319585	7.84015	18.5334	57.9921	1.74675	0.00536614	620.283
1199	0.0106	0.283639	0	0	0.120086	0.320238	1.45608	0.91378	8.32019	2.1281	6.06019	0.720571	6.52939	1.22692	2.0041	0.373323	123.282	71.4574	14007.4	0.85	1.22	2.68719	1	0.5	28.0898	0.294239	11.1304	16.6652	56.6381	0.696721	0.00302821	690.575
1200	0	0.0809137	0	0	0	0.157795	0.365379	0.397446	4.70832	1.32167	5.68506	0.722127	4.84978	0.745264	1.23652	0.433597	55.8378	43.1836	14499.9	1.12	0.78	2.42749	1	0.5	19.0338	0.0809137	5.62894	13.3239	164.668	1.4359	0.0077653	682.109
1201	0.0087	0.112657	0	0	0.181247	0.0439392	0.732557	0.510803	2.81462	0.967229	3.41742	0.679723	4.48941	0.686439	1.8974	0.1431	46.2425	36.7612	14535.2	1.08	0.88	4.05579	1	0.5	14.6447	0.121357	4.28316	10.2402	84.3808	1.22727	0.00309455	726.455
1202	0	0.0297621	0	0	0	0.0580398	1.45145	0.96711	10.4864	2.19367	9.95769	1.3019	13.5961	1.85565	1.74311	0.673398	61.0678	93.2739	13741.9	0.74	0.69	10.7147	1	0.5	41.8977	0.0297621	12.963	28.905	971.202	1.07246	0.0110271	822.743
1203	0	0.127397	0	0	0	0.0709832	0.788954	0.591391	5.18826	1.37092	4.46534	0.549043	3.80318	0.954196	1.53069	0.166158	58.4059	45.9987	14163.7	1.62	0.81	3.27604	1	0.5	17.9097	0.127397	6.63959	11.1427	87.4639	2	0.00284488	707.518
1204	0	0.0668439	0	0	0	0.152082	1.08664	0.4462	5.17425	1.3445	5.26308	1.27715	9.69134	1.90229	0.733362	0.367047	47.2836	53.1961	14621.1	1.47	0.84	1.00269	1	0.5	26.4044	0.0668439	6.85916	19.4784	291.401	1.75	0.00776267	614.292
1205	0	0	0	0	0	0.0288037	1.60072	0.602728	8.89438	2.65586	8.8622	2.28364	18.1606	3.07671	0.615653	0.433859	41.218	92.7221	13865.2	1.09	1.05	9.3055	1	0.5	46.1656	0	11.1266	35.039	0	1.0381	0.010526	807.632
1206	0.0054	0.0915589	0	0	0.245511	0.0892772	0.744196	0.48433	6.35421	2.163	7.28392	1.69182	14.9062	2.70296	1.04982	0.387669	53.6035	75.0202	13701.7	2.91	1.22	6.86713	1	0.5	36.7624	0.0969589	7.91752	28.7479	296.496	2.38525	0.00723215	776.445
1207	0	0.230802	0	0	0.773592	0.0750145	1.66752	0.537771	4.86684	1.26183	4.89054	0.870336	8.13188	1.40358	1.4545	0.839808	72.5646	46.5942	13714.1	3.55	1.64	5.19314	1	0.5	24.7097	0.230802	7.92074	16.5582	71.7419	2.16463	0.0115732	749.314
1208	0.038	28.0973	0.0201197	2.07681	3.61475	1.39028	28.4381	9.29693	137.229	59.1133	294.538	66.9135	700.674	132.042	93.2977	154.602	191.679	1806.98	9111.98	15.75	4.08	6.26545	1	0.5	1463.48	30.2322	179.969	1253.28	41.4551	3.86029	0.806568	767.384
1209	0.04	40.0986	0.242634	2.78315	4.12897	1.40034	31.2211	10.5356	144.589	59.1704	275.265	66.7532	651.727	112.903	185.71	312.745	284.171	1758.53	9267.36	6.25	11.25	3.28508	1	0.5	1400.86	43.1644	191.875	1165.82	27.0088	0.555556	1.10055	707.758
1210	0.00460768	17.1474	0.171834	2.60541	4.41023	1.17173	26.3528	9.40882	121.54	47.979	231.247	54.3426	518.122	91.6374	52.9242	86.1532	105.393	1445.14	8506.3	31.52	8.34	4.45916	1	0.5	1126.14	19.9293	162.884	943.328	47.3338	3.77938	0.817448	735.101
1211	0.029	33.93	0.0816188	1.85635	4.32058	0.871953	28.7822	11.0253	140.712	55.3929	249.441	58.1392	575.5	93.7328	301.391	481.72	414.44	1626.03	11196.9	14.83	9.36	6.35421	1	0.5	1253.82	35.8969	185.712	1032.21	28.7547	1.5844	1.16234	768.763
1212	0.0418875	42.536	0.130175	2.50011	6.12524	1.05205	33.9365	11.8604	166.52	65.1299	297.386	70.7182	695.644	114.643	234.271	408.99	414.499	1942.05	11182	21.14	1.67	14.6386	1	0.5	1508.22	45.2082	219.494	1243.52	27.5065	12.6587	0.986708	857.733
1213	0.028169	74.3793	0.131311	1.59281	4.86807	0.583679	29.3763	12.7546	178.205	74.9381	382.11	91.7859	911.479	162.558	436.965	794.589	640.821	2403.36	13208.3	22.67	9.66	6.81519	1	0.5	1924.79	76.1316	225.788	1622.87	21.3167	2.34679	1.23995	775.688
1214	0.027	53.1933	0.182891	3.54951	6.18047	1.68502	35.0302	13.0664	169.382	62.0725	290.576	65.6005	642.311	113.05	271.649	537.276	349.388	1906.41	9597.71	6.94	12.37	1.89843	1	0.5	1455.91	56.9527	225.344	1173.61	20.6068	0.561035	1.53776	662.235
1215	0.035	24.5312	0.357864	6.25084	7.62342	1.87413	35.1803	12.4903	157.638	59.1248	275.398	66.4668	646.493	111.107	82.4722	148.25	164.691	1831.42	9224.96	8.09	10.08	12.2585	1	0.5	1404.57	31.1749	214.806	1158.59	37.1642	0.802579	0.900172	837.567
1216	0.04	5.65901	0	0.148459	1.15181	0.207723	5.08377	2.16578	33.0151	13.9935	63.6147	16.2842	150.446	27.1461	117.459	149.243	297.866	427.718	12120.6	9.08	7.66	6.35229	1	0.5	318.956	5.84747	41.6242	271.485	46.4277	1.18538	0.501042	768.734
1217	0.021	12.7432	0.0295346	0.940426	1.70558	0.375944	10.4789	3.55689	48.937	21.2217	95.7824	24.7151	255.796	43.9449	56.2307	84.9922	131.508	625.414	12319.5	9.54	8.54	4.59868	1	0.5	520.248	13.7341	65.0542	441.46	32.1433	1.1171	0.64629	737.943
1218	0.0191933	15.3109	0.0596469	1.08527	2.04115	0.180768	38.6552	14.8074	198.054	79.7874	347.835	74.4591	672.869	111.437	96.9259	169.868	385.713	2156.16	13066.3	16.88	9.77	6.19143	1	0.5	1556.6	16.475	253.738	1286.39	78.0812	1.72774	0.440399	766.221
1219	0.039	6.96665	0.0544994	0.826343	2.21471	0.297304	6.91688	2.60442	46.2678	17.1308	76.8435	18.447	177.319	33.7766	22.4843	31.2629	53.8945	507.074	11758.8	19.25	4.29	45.2573	1	0.5	389.704	7.8865	58.3011	323.517	41.0216	4.48718	0.580077	1005.39
1220	0.0074	0.300972	0	0	0.16	0	0.716824	0.229033	5.84829	3.05778	20.5655	7.4312	90.1384	21.3097	4.59388	0.362278	70.4463	120.63	13126.9	3.41	0.77	2.41837	1	0.5	149.765	0.308372	6.95414	142.503	462.113	4.42857	0.00514262	681.799
1221	0	0.0373944	0	0.1255	0.1126	0.022224	0.211523	0.150186	3.68154	2.25836	17.4051	4.7752	53.2726	11.3648	2.06806	0.362814	37.0514	93.5542	11100	1.28	1.45	3.80597	1	0.5	93.417	0.162894	4.17807	89.076	546.833	0.882759	0.00979219	720.741
1222	0	0.0300103	0	0.1377	0.375	0	0.254628	0.361589	5.53981	3.27761	14.5753	3.88401	28.6106	4.25354	0.968071	0.418043	25.6389	116.137	12357.9	0.75	1.22	8.01787	1	0.5	61.2998	0.16771	6.53103	54.6011	325.568	0.614754	0.0163051	792.117
1223	0.0130144	0.103123	0	0.098	0.259517	0.0367724	0.466654	0.381034	5.26091	3.03831	13.9176	2.95672	26.2863	4.24781	1.78692	0.471685	34.0408	107.59	12393.9	0.91	1.04	1.57436	1	0.5	57.0658	0.214137	6.40488	50.4468	235.582	0.875	0.0138564	647.649
1224	0.017	0.14151	0	0	0.242808	0.0688113	0.509381	0.775016	10.2332	4.63987	24.332	4.18045	56.3474	8.83234	2.7301	0.171177	36.4343	168.578	12383.5	2.17	0.88	2.94601	1	0.5	110.32	0.15851	11.8292	98.332	620.353	2.46591	0.00469823	698.365
1225	0.0089	0.213437	0	0	0.09	0.031712	0.301823	0.385751	5.61148	2.81595	13.2483	3.3573	28.966	5.88237	1.09055	0.147916	30.056	106.817	12405.4	3.12	0.66	1.35771	1	0.5	60.913	0.222337	6.42076	54.2699	244.088	4.72727	0.00492136	636.429
1226	0.0094	0.106276	0	0.12	0.13	0.0236856	0.676303	0.256101	6.10844	2.44062	8.84028	2.2536	21.1641	2.82431	1.83117	0.160195	33.9515	83.1676	12503.9	4.88	0.51	3.04221	1	0.5	44.9531	0.235676	7.19453	37.5229	159.214	9.56863	0.00471835	701.117
1227	0.018	0.145716	0	0.099	0.114593	0	0.20606	0.246287	5.86883	3.16133	20.1881	5.3217	69.5102	13.658	0.548353	0.21207	35.8662	123.674	13003.9	3.67	1.04	2.78079	1	0.5	118.538	0.262716	6.43577	111.839	425.704	3.52885	0.00591281	693.461
1228	0.00652143	0.744113	0	0.1459	0.23	0	0.584592	0.498091	4.78679	2.67744	11.8727	2.83148	25.5073	5.56943	4.07714	1.05717	92.9656	98.5201	12884.2	2.04	0.55	7.88911	1	0.5	55.4544	0.896535	6.09947	48.4583	54.0507	3.70909	0.0113716	790.458
1229	0.0056	0.0890304	0	0.17	0.28	0.039684	0.629496	0.840294	17.7051	7.95252	37.9415	8.3985	76.3281	12.8993	0.907662	0.0925505	28.9425	302.602	13716.4	1.06	0.74	5.09706	1	0.5	163.279	0.26463	19.4946	143.52	542.341	1.43243	0.00319773	747.551
1230	0.0094	0.327211	0	0.1346	0.216697	0	0.292239	0.152166	4.16165	2.33284	16.3261	4.26572	49.0388	8.82326	3.53454	1.91921	64.9955	100.86	13434.2	0.57	0.67	1.3146	1	0.5	86.0807	0.471211	4.82275	80.7867	171.445	0.850746	0.0295283	634.02
1231	0.024	0.0932457	0	0.1089	0.0733296	0.0207815	0.461517	0.318325	7.94143	3.6611	17.4183	3.62043	36.0778	5.36057	3.59441	0.242332	41.2349	131.782	13555	2.41	1.24	2.66924	1	0.5	75.1797	0.226146	8.81539	66.1382	292.458	1.94355	0.00587687	690.013
1232	0.0081	0.0994774	0	0.1124	0.268223	0	0.401929	0.650662	11.1612	5.84752	29.2685	6.16868	60.9528	11.0686	0.460449	0.30137	27.9818	204.82	13469.7	1.33	1.33	5.42396	1	0.5	126.008	0.219977	12.482	113.306	515.081	1	0.0107702	753.444
1233	0.00433954	0.151296	0	0	0.173067	0.0490457	0.311199	0.320394	7.29381	4.3086	19.3339	3.7026	37.5645	6.89432	1.74624	0.228768	29.9169	140.242	13034.8	2.01	0.86	2.09983	1	0.5	80.1071	0.155635	8.14751	71.8039	461.36	2.33721	0.00764679	670.286
1234	1.33099	69.323	0.809511	10.5911	13.0915	3.64619	75.1142	24.9488	348.742	134.281	697.025	142.064	1620.79	267.789	84.5683	186.202	178.971	4666.03	29566.5	8.76089	2.55023	14.464	1	0.5	3409.54	82.0546	465.543	2861.95	34.8785	3.43533	1.0404	856.347
1235	0.136556	153.499	0.812672	22.0444	32.344	10.8341	214.317	73.8132	40.8	344.394	80.1	309.28	3367.43	41.89	762.024	1460.22	1020.03	516.63	22356.9	13.1835	4.76597	20.9204	1	0.5	4691.7	176.493	372.108	4143.1	23.4746	2.76617	1.43155	900.616
1236	0	37.0791	0.219339	6.5386	11.807	3.4919	86.005	29.9668	430.067	157.734	826.677	166.511	1881.75	318.958	194.163	356.542	427.074	5616.98	23448	4.50971	2.13189	11.7671	1	0.5	3956.81	43.8371	561.338	3351.63	76.4565	2.11536	0.834848	833.019
1237	0.045161	72.5958	0.3591	8.61293	13.9009	3.6462	81.6469	25.45	377.052	137.129	702.05	144.294	1637.09	275.154	176.2	281.482	333.387	4845.1	26503.1	9.29602	2.95216	14.4087	1	0.5	3479.02	81.613	501.696	2895.71	35.481	3.14889	0.844311	855.904
1238	0	65.1739	0.368709	2.85787	9.28716	1.33005	57.5258	19.1854	274.452	108.003	560.361	110.819	1284.05	218.475	328.134	659.791	768.519	3806.06	32061.2	6.57238	4.97251	2.83998	1	0.5	2711.89	68.4004	361.781	2281.71	33.3581	1.32174	0.858522	695.245
1239	0	64.8004	0.328912	6.89039	14.7728	4.20256	90.4343	28.9339	422.028	154.826	786.828	159.515	1814.43	305.353	260.097	472.292	522.996	5474.24	27103.9	4.18584	2.21165	7.65654	1	0.5	3853.35	72.0197	560.371	3220.96	44.7232	1.89263	0.90305	787.404
1240	2.5151	163.401	0.821752	6.72854	13.1386	2.17337	88.1324	29.4385	430.9	163.542	851.87	178.474	2137	356.698	34.03	52.41	1653.15	5940.03	30948.3	14.7243	8.31781	17.1102	1	0.5	4424.83	173.466	563.783	3687.58	21.2582	1.77021	0.0317031	876.079
1241	0.0863526	88.3101	0.770241	11.2371	25.4959	5.71444	164.68	54.5047	40.8	273.649	1322.89	256.753	2835.31	463.283	428.784	830.739	736.485	516.63	23505.7	6.29144	3.05759	12.9555	1	0.5	5543.48	100.404	291.195	5151.88	51.3116	2.05765	1.12798	843.774
1242	0.0613797	81.8228	0.836966	13.7911	24.8516	5.1826	124.673	41.4947	563.048	199.539	994.589	189.02	2060.64	334.108	158.178	293.184	244.245	6790.27	23648.9	9.87931	2.6585	13.3357	1	0.5	4633.66	96.5122	759.25	3777.9	39.1443	3.71612	1.20037	847.049
1243	0.0415246	82.5672	0.530641	10.8845	21.9265	4.67539	121.024	41.2181	560.179	203.845	1027.05	194.261	2101.49	338.012	471.548	1045.14	547.976	7146.65	24792.3	10.405	2.83313	20.4503	1	0.5	4707.71	94.0239	749.022	3864.66	41.103	3.67263	1.90728	897.79
1244	0.0697145	88.8134	0.179973	4.46364	7.49657	1.89268	54.5683	20.6241	299.548	113.5	615.032	128.933	1493.51	256.594	306.68	673.339	772.793	4096.12	32205.3	19.701	7.23374	16.7191	1	0.5	3085.23	93.5268	384.13	2607.57	27.8805	2.72349	0.871306	873.322
1245	0.0154167	25.3657	0.0569626	0.214339	3.09685	0.641331	14.9887	6.14427	86.5486	35.4881	187.262	41.8997	508.197	86.0926	190.272	307.648	779.711	1319.39	42643.5	3.8905	2.47115	1.87221	1	0.5	996.012	25.6524	111.42	858.939	33.4838	1.57437	0.394567	661.136
1246	0.0925576	59.8543	0.332293	6.47348	14.1417	2.82156	75.9618	24.9766	354.131	129.252	671.914	133.503	1519.78	259.171	117.604	216.055	261.519	4633	28149.1	8.83823	3.07893	14.1785	1	0.5	3252.4	66.7527	472.033	2713.62	40.6518	2.87056	0.826154	854.05
1247	0.0693332	70.6023	0.513071	7.31678	14.212	3.60778	62.9422	23.3052	315.331	120.58	593.917	117.506	1321.31	210.826	98.6899	231.82	244.127	4041.98	27654	8.34484	2.66598	22.5156	1	0.5	2862.04	78.5015	419.398	2364.14	30.1158	3.13013	0.949591	909.848
1248	0.0364509	26.4384	0.0539857	1.96403	4.93619	1.6648	27.1428	9.46403	126.114	47.191	246.848	45.7503	515.006	80.6513	164.288	389.98	515.591	1692.99	34819.8	3.15818	1.86946	9.24599	1	0.5	1133.26	28.4929	169.321	935.447	32.8309	1.68936	0.756375	806.954
1249	0	53.6889	0.675861	7.97805	18.8402	3.43036	106.491	33.4523	470.347	167.336	841.392	163.982	1853.79	299.628	208.539	554.854	882.68	5887.43	31419.9	7.63076	2.84828	62.7625	1	0.5	4021.03	62.3428	632.561	3326.12	53.3522	2.67907	0.628601	1055.65
1250	0.0509835	76.4516	1.22904	18.7665	36.5311	8.97902	214.519	63.3525	40.8	296.009	1411.91	266.995	2908.49	467.325	378.761	855.867	909.443	516.63	22212.6	9.12559	2.77247	14.7834	1	0.5	5811.41	96.4981	364.182	5350.73	55.449	3.2915	0.941089	858.873
1251	0.0521428	32.9209	0.309485	5.85133	11.5813	2.36031	61.8575	20.408	282.432	104.723	517.168	105.211	1173.07	192.377	103.875	188.877	354.039	3591.94	26796.3	3.21116	1.86406	29.7362	1	0.5	2510.32	39.1339	378.639	2092.55	53.4715	1.72267	0.533492	946.15
1252	1.2175	193.95	1.94736	28.0212	49.0824	8.94461	276.365	89.1107	40.8	434.455	80.1	435.242	4893.53	41.89	823.548	1802.17	1436.53	516.63	23724.2	16.4584	5.57228	2.71611	1	0.5	6574.66	225.136	464.303	5885.22	26.1407	2.95362	1.25453	691.476
1253	0	71.6487	0.153367	3.70648	9.59862	1.90475	52.357	17.6473	256.682	95.4301	517.915	104.237	1256.01	210.732	300.639	667.325	640.152	3581.56	27163.4	13.9892	5.22015	12.7778	1	0.5	2598.02	75.5086	338.19	2184.32	28.9282	2.67984	1.04245	842.218
1254	0.0136894	90.8493	0.223755	6.81904	15.548	2.30234	102.499	35.9804	506.02	179.782	900.811	169.4	1822.17	289.701	178.517	385.903	450.359	6214.68	34717.1	6.28128	2.19339	7.14678	1	0.5	4122.11	97.9058	662.35	3361.86	34.3377	2.86373	0.85688	780.438
1255	0.0841899	126.321	1.87914	22.9151	54.8803	10.9198	296.805	91.9664	40.8	404.27	80.1	350.505	3725.86	41.89	602.304	1248.73	1029.76	516.63	24250.5	10.5244	3.58329	13.4642	1	0.5	5249.2	151.199	495.372	4602.63	30.4409	2.93708	1.21265	848.138
1256	0.116156	104.924	1.15282	18.412	40.8487	10.0637	230.736	73.1971	40.8	323.052	80.1	298.45	3145.86	494.834	494.302	1131	1170.12	516.63	20926	12.2107	3.66925	17.4356	1	0.5	4862.54	124.605	395.646	4342.29	34.8484	3.32784	0.96657	878.334
1257	0.0270418	25.5301	0	0.606546	2.39962	0.291374	21.7505	9.74099	153.618	61.0942	355.872	80.3204	991.206	169.638	207.149	351.37	1091.22	2365.26	32503.6	21.9568	7.34294	72.1801	1	0.5	1872.1	26.1637	187.801	1658.13	63.3754	2.99019	0.321998	1078.37
1258	0.0404658	68.5823	0.421992	3.94722	9.20207	2.09882	63.749	21.2634	317.359	122.875	650.967	134.124	1593.46	264.868	417.799	781.054	911.484	4501.21	35318.3	6.39909	4.47756	8.80589	1	0.5	3252.96	72.992	413.672	2766.29	37.8986	1.42915	0.856903	801.831
1259	0	218.761	0.957264	10.0519	15.3393	7.40582	123.889	41.6397	592.506	234.216	1244.82	270.821	3229.08	41.89	34.03	52.41	2051.59	516.63	21901.7	16.2083	6.33977	18.2057	1	0.5	6031.38	229.77	780.78	5020.83	21.8515	2.55661	0.025546	883.543
1260	0	86.1076	0.234998	4.93115	10.0564	2.36845	65.9255	23.3275	369.2	144.024	775.142	162.233	1943.03	334.128	417.912	980.784	1606.07	5227.43	36114.8	14.087	7.61875	8.67453	1	0.5	3920.71	91.2738	470.878	3358.56	36.7966	1.84899	0.610672	800.261
1261	0.0300713	25.5793	0.0450108	0.943456	3.74657	0.64969	22.7987	9.06136	145.546	57.3533	313.313	68.361	823.981	142.046	131.032	284.966	697.586	2126.97	32508.8	8.34471	3.74624	5.22585	1	0.5	1613.45	26.5978	181.802	1405.05	52.8259	2.22749	0.408503	749.909
1262	0	14.5144	0	0.635363	1.49128	0.0638163	12.9062	5.38836	85.367	37.4689	226.648	53.2558	719.752	125.837	153.411	223.088	824.745	1464.37	46581.8	5.77729	7.11882	6.22294	1	0.5	1283.33	15.1498	105.217	1162.96	76.7644	0.811551	0.270493	766.717
1263	0.0277411	1.93576	0	0	0	0.260317	1.98623	1.19678	18.6198	7.65533	40.7523	8.27344	93.186	17.8317	13.4408	10.8962	416.423	332.672	40657.4	3.07436	1.33536	6.42948	1	0.5	191.725	1.9635	22.0631	167.699	85.4079	2.30227	0.0261661	769.921
1264	0.0181533	0.932641	0	0.407812	0.547517	0.121704	1.62513	1.1748	13.7098	6.06477	26.9201	6.17865	62.4215	10.9065	15.8325	2.88697	519.726	258.223	38175.7	3.97068	1.77234	3.15572	1	0.5	131.029	1.35861	17.1789	112.492	82.7992	2.24035	0.00555478	704.273
1265	0.0203712	2.09616	0	0.27443	0.204404	0	2.46661	0.814642	15.4546	5.08502	29.781	5.88831	68.2963	12.5763	35.0427	6.46236	585.95	247.264	39189	3.00085	1.02384	2.36202	1	0.5	142.958	2.39097	18.9403	121.627	50.8694	2.93097	0.0110289	679.857
1266	0.034837	3.21466	0.0387329	0.312795	0.698517	0.28091	2.8943	1.13905	18.0412	6.906	34.5537	6.68203	84.6415	14.5212	29.0507	14.4647	829.608	327.653	41385.1	3.18531	1.48235	5.55523	1	0.5	173.959	3.60102	23.054	147.304	40.9063	2.14883	0.0174356	755.73
1267	0	1.43707	0	0.0872327	0.0972736	0.235496	2.18519	1.12368	17.5587	6.29278	31.28	6.13657	74.1822	12.5457	8.51896	5.49662	342.306	271.494	39518.8	1.49578	0.821049	2.81959	1	0.5	153.162	1.5243	21.2004	130.437	85.572	1.82179	0.0160576	694.634
1268	0.0490206	1.4632	0	0	0.326712	0.0880427	1.98548	0.861631	11.0222	4.76236	25.2049	5.95855	72.6603	14.039	24.9311	7.55542	344.117	211.523	43283.4	1.36667	1.17333	2.37047	1	0.5	138.421	1.51222	14.2841	122.625	81.0894	1.16477	0.0219559	680.151
1269	0	2.07303	0.0317768	0	0.106122	0.20086	3.26028	1.25725	19.2735	6.95104	34.3365	6.47999	80.4702	14.2717	10.4738	11.0221	288.05	310.438	37236.3	2.26802	1.34528	3.70447	1	0.5	168.712	2.10481	24.098	142.509	67.7067	1.6859	0.0382644	718.331
1270	0	5.91688	0.0343685	0	1.03182	0.248188	4.87298	1.43204	22.3359	7.81407	35.4789	7.02104	66.6939	13.9227	30.0115	25.6169	491.401	312.878	40271.4	1.70013	0.868011	4.67158	1	0.5	166.803	5.95125	29.9209	130.931	22.0005	1.95866	0.0521304	739.4
1271	0	3.09645	0	0.107723	0.598647	0.162374	1.41115	0.748955	9.62447	4.06693	17.673	3.47871	37.5155	6.3047	16.0582	9.85032	314.848	160.147	45709.1	1.06151	0.61396	2.09425	1	0.5	84.7886	3.20417	12.5456	69.0389	21.5465	1.72895	0.0312859	670.072
1272	0.202021	292.391	0.998053	12.9058	24.3533	4.36857	158.124	54.4934	40.8	255.561	1230.87	243.502	2591.55	427.319	707.172	1646.06	983.123	516.63	28806.9	25.2686	7.18924	25.9026	1	0.5	5337.44	306.497	282.139	4748.8	15.4938	3.51477	1.67432	927.863
1273	0.0608419	72.5146	0.209753	4.7618	9.03391	2.94446	56.9926	21.4858	328.036	129.04	702.476	152.639	1801.79	320.859	164.545	337.878	438.575	4779.07	29232.2	11.8236	4.78599	14.1338	1	0.5	3602.85	77.547	418.493	3106.81	40.0635	2.47045	0.7704	853.687
1274	0	28.2858	0.0562334	0.541354	3.5553	0.78784	20.3089	7.73902	100.31	34.0295	152.504	30.441	325.839	51.0833	131.648	191.23	440.707	1177.48	32073.2	5.39922	2.30025	8.63894	1	0.5	755.481	28.8834	132.701	593.897	20.5619	2.34723	0.433915	799.833
1275	0.0317265	22.5598	0.304807	3.04323	8.25571	2.53268	37.9584	11.9135	158.87	60.2565	304.092	65.4629	724.32	130.04	39.0376	71.4157	175.494	2078.18	23658.8	2.70258	1.04839	19.9158	1	0.5	1529.64	25.9395	219.53	1284.17	49.5063	2.57783	0.40694	894.514
1276	0	0.679804	0	0.143881	0.252229	0.275449	3.13409	1.62791	22.0897	7.15293	25.7552	4.49498	46.1051	7.64189	4.5593	0.657135	145.856	265.019	37657.9	0.814674	0.680636	6.26234	1	0.5	119.353	0.823685	27.3794	91.1502	110.661	1.19693	0.00450537	767.335
1277	0.0179363	1.19343	0.0132389	0	0.449045	0.294033	4.89658	2.14659	33.732	9.68461	42.2726	7.34307	75.3152	11.4339	5.11417	0.917992	224.37	385.522	32992.5	1.24102	0.680622	5.73028	1	0.5	188.792	1.2246	41.5183	146.049	119.263	1.82336	0.00409142	758.71
1278	0	0.795327	0	0.0784738	0.183507	0.250249	5.41804	1.76366	24.8812	6.8211	26.3743	4.25566	42.0027	7.35071	4.64972	0.861135	181.25	274.71	35768.2	1.13487	1.09909	10.2293	1	0.5	120.175	0.873801	32.4967	86.8045	99.3413	1.03255	0.0047511	817.728
1279	0	1.39279	0	0.108456	0.76097	0.864491	7.02646	2.9809	29.9005	7.64671	27.8623	4.77645	44.5733	5.9919	11.281	1.33904	186.826	298.717	35838.5	0.861574	0.298565	4.9934	1	0.5	133.885	1.50124	41.5333	90.8507	60.517	2.88572	0.00716732	745.618
1280	0	0.823976	0.017027	0.0986087	0.115435	0.156998	5.44154	2.03596	25.419	7.67551	32.5684	5.62535	60.6395	8.73906	13.4794	0.625315	188.168	337.233	33774.2	1.0671	1.01397	10.1205	1	0.5	149.356	0.939612	33.1689	115.248	122.655	1.0524	0.00332318	816.578
1281	0.0212267	0.579265	0	0	0.318712	0.431877	5.47346	1.68028	24.1574	6.76448	29.8318	5.49853	51.2768	8.64297	4.40877	0.490893	193.347	284.355	34532.8	0.830472	0.456458	3.37113	1	0.5	134.677	0.600492	32.0618	102.015	169.885	1.81938	0.00253892	710.014
1282	0	0.987268	0	0	0.364638	0.632039	4.08472	2.038	24.2197	6.42415	25.6165	4.55782	43.225	6.57596	5.05812	0.803799	182.07	266.201	35995.7	0.927088	0.563913	2.60146	1	0.5	118.726	0.987268	31.3391	86.3995	87.5137	1.64403	0.00441477	687.858
1283	0	1.07935	0	0.153439	0.270001	0.414238	3.41395	1.38538	17.2961	4.43932	15.4272	2.53632	21.6456	3.20665	4.55558	0.585518	178.181	172.612	36218.2	0.902438	0.402785	2.93225	1	0.5	71.2675	1.23279	22.7796	47.2551	38.3319	2.24049	0.00328608	697.966
1284	0.0244889	0.99649	0.0180987	0.313145	0.367629	0.231856	1.98952	1.0294	13.657	3.77216	13.6756	2.18533	25.3622	4.97876	4.77862	0.699461	186.5	126.568	32885.8	0.840722	0.696959	5.69739	1	0.5	68.6016	1.35222	17.2754	49.974	36.9569	1.20627	0.00375046	758.156
1285	0	0.576498	0	0	0.146192	0.201098	3.62399	1.44249	17.6523	5.07856	21.6941	3.95247	38.0707	5.53814	3.06014	1.00986	132.889	212.395	36346.5	0.656738	0.423166	3.36374	1	0.5	97.9765	0.576498	23.0661	74.3339	128.941	1.55196	0.00759926	709.823
1286	0	0.509864	0	0.0605843	0	0.0960875	1.60343	0.854787	13.8057	4.72964	17.319	3.24305	35.5621	5.1597	2.88994	0.446149	120.382	171.734	37382.6	0.697823	0.469397	8.83658	1	0.5	82.9439	0.570448	16.3601	66.0134	115.722	1.48664	0.0037061	802.195
1287	0	1.28983	0	0.0745897	0.350427	0.449459	5.44791	2.0934	22.3746	5.70504	22.6228	3.92671	36.3676	5.66786	6.52337	1.02378	215.313	232.293	34022.8	0.945551	0.631161	3.06129	1	0.5	106.37	1.36442	30.7158	74.2901	54.4482	1.49811	0.00475482	701.654
1288	0	0.438373	0	0	0	0.143697	1.19911	0.601539	7.63562	2.57962	10.9753	1.57522	18.3794	2.94553	3.51824	0.256585	82.5009	109.537	33293.6	0.48987	0.459015	7.44586	1	0.5	46.4735	0.438373	9.57996	36.4551	83.1602	1.06722	0.00311009	784.572
1289	0.0163811	2.39847	0	0.0697629	0.573735	0.552921	7.53055	2.24355	22.142	6.42966	25.2648	4.40115	44.3797	6.92893	18.7003	2.64588	345.026	245.359	34234.1	0.603607	0.365723	3.00157	1	0.5	122.932	2.48462	33.0427	87.4043	35.1782	1.65045	0.00766865	699.963
1290	0	1.31083	0	0.0611853	0.287667	0.581604	3.75428	2.06959	22.8302	7.19223	32.0683	5.28592	52.0097	8.41508	7.26758	0.954814	212.039	304.824	35301	1.11347	1.16587	5.56124	1	0.5	135.867	1.37201	29.5233	104.971	76.5089	0.955049	0.00450301	755.833
1291	0	0.919305	0	0	0.592518	0.532245	4.53182	2.28071	23.1368	6.22171	22.2135	3.90459	39.5167	6.09168	4.41748	0.986434	188.991	251.92	33862.2	0.923114	0.360101	5.72917	1	0.5	109.942	0.919305	31.0741	77.9482	84.7903	2.56349	0.00521949	758.691
1292	0.0145536	1.48297	0	0.123854	0.509674	0.529596	6.22237	2.30118	26.0597	6.39308	21.9141	3.30395	35.5444	4.5971	7.62808	0.937086	256.22	265.535	34793	0.752095	0.560338	7.65674	1	0.5	108.996	1.62138	35.6225	71.7526	44.254	1.34222	0.00365734	787.406
1293	0	0.413681	0	0.080477	0.189269	0.34485	2.9389	1.10003	14.9947	5.10575	22.2888	3.92505	41.626	6.14302	4.23606	0.434478	114.575	205.911	35453	0.803994	0.512827	7.56489	1	0.5	99.1506	0.494158	19.5677	79.0887	160.047	1.56777	0.00379207	786.18
1294	0	1.19904	0.0189309	0	0.0794008	0.620381	5.64056	2.27858	23.6274	5.15394	22.2225	3.10255	36.068	5.25947	7.25268	0.893189	281.519	238.803	32965.7	0.965498	0.500382	8.69984	1	0.5	105.271	1.21797	32.2463	71.8065	58.956	1.92952	0.00317275	800.565
1295	0	0.539124	0	0.0786904	0.555451	0.273965	2.82847	1.28881	18.1076	5.91021	23.8569	4.12669	39.0101	5.98276	5.02915	0.546427	133.596	241.17	35774.6	0.752459	0.749052	6.83253	1	0.5	102.559	0.617814	23.0543	78.8867	127.687	1.00455	0.00409015	775.941
1296	0.224417	95.5787	0.320024	6.49848	11.6463	2.5177	67.221	23.974	323.838	121.319	607.528	127.803	1429.07	246.07	405.151	803.423	725.579	4258.39	30693.4	19.8539	6.50955	9.1833	1	0.5	3063.61	102.622	429.197	2531.79	24.6711	3.04996	1.10729	806.236
1297	0.952206	95.6185	0.600866	8.34855	14.5275	2.01272	92.3572	34.9942	501.441	191.506	968.187	204.276	2283.99	387.264	648.915	1645.23	2162.39	6585.69	32827.8	40.2676	13.2528	51.2634	1	0.5	4786.07	105.52	645.332	4035.22	38.2412	3.03843	0.760838	1024.09
1298	0.31814	115.023	0.605334	10.0244	18.7432	3.6617	110.211	38.7274	528.838	185.972	893.762	173.239	1884.11	307.617	631.178	1419.28	883.565	6264.81	28432	18.941	5.83367	26.0544	1	0.5	4270.85	125.971	700.181	3444.7	27.3451	3.24684	1.60632	928.626
1299	0.876043	193.304	0.949025	13.0322	22.0269	5.38782	140.77	46.6965	40.8	212.507	1016.09	199.705	2074.32	339.002	534.204	1106.67	636.215	7166.2	30530.5	25.4772	6.83289	11.1671	1	0.5	4305.46	208.161	255.681	3841.62	18.4551	3.72861	1.73946	827.255
1300	0.0780713	84.0413	1.08867	18.4794	32.7943	7.12363	179.202	54.7554	40.8	232.502	1093.67	211.891	2235.71	360.556	202.896	443.025	425.274	7780.94	26644.2	7.10991	2.20353	21.8931	1	0.5	4552.69	103.687	314.676	4134.33	39.873	3.2266	1.04174	906.309
1301	0.0887517	60.1347	1.10314	17.6959	29.9042	6.74333	190.647	62.7753	40.8	264.862	1230.54	233.751	2371.03	374.413	229.29	452.266	363.422	516.63	25926.6	8.09573	2.65307	7.5852	1	0.5	4884.5	79.0225	330.87	4474.6	56.6244	3.05145	1.24447	786.452
1302	0	2.95937	0	0.226056	0.703893	0.374411	4.00178	1.87224	26.5466	7.77297	33.0544	6.15498	63.4041	10.3162	14.7334	9.22817	456.135	304.013	39461.6	1.59733	1.87488	7.1677	1	0.5	157.387	3.18543	33.4989	120.703	37.8921	0.851962	0.0202312	780.732
1303	0	2.77293	0	0.0679032	0.158585	0.35849	5.41168	2.92142	38.8794	13.1969	54.3816	9.37444	92.4178	15.0439	14.7625	8.26846	558.603	505.159	40394.5	1.53697	2.50289	4.20297	1	0.5	234.985	2.84083	47.7296	184.415	64.9158	0.614076	0.014802	729.689
1304	0.0171084	0.508855	0.0126161	0.220671	0.25771	0.205596	4.363	1.57712	22.4932	5.70469	20.582	3.71505	34.3365	5.77202	7.64892	1.20577	272.921	250.437	36560.6	2.06614	1.30021	3.86979	1	0.5	99.7662	0.759251	28.8967	70.1102	92.3413	1.58908	0.00441803	722.229
1305	0	3.37805	0	0	1.08464	0.519147	4.65772	1.74587	23.5909	5.52826	21.2897	3.44171	35.6729	6.16814	15.7232	8.84035	445.62	221.044	36912	0.931963	0.982877	6.58606	1	0.5	107.077	3.37805	31.5983	72.1007	21.3439	0.948199	0.0198383	772.295
1306	0	1.34322	0	0.0752324	0.263684	0.420598	3.62891	1.68017	25.3235	7.32754	24.23	4.41531	39.6341	5.41857	10.8552	2.82234	336.976	275.401	36221.8	2.59147	1.68937	7.77293	1	0.5	113.761	1.41845	31.3168	81.0255	57.1224	1.53398	0.0083755	788.941
1307	0	1.7112	0	0.148875	0.434895	0.832341	7.1142	3.33643	44.2409	12.2343	48.7269	8.62189	88.7108	12.7156	16.2177	2.1577	366.808	500.629	38737.4	2.33036	1.14344	5.23322	1	0.5	228.828	1.86007	55.9588	171.009	91.937	2.03803	0.00588236	750.042
1308	0	3.09049	0	0	0.265255	0.246774	4.20083	1.88487	31.5227	10.5391	44.703	9.57191	103.337	18.8005	20.5318	9.13532	655.466	388.729	42251.7	2.34751	1.96812	8.21362	1	0.5	228.163	3.09049	38.1205	186.952	60.4927	1.19277	0.0139371	794.6
1309	0	0.305621	0	0	0.160035	0.10633	1.55127	0.734681	12.2235	3.83701	16.2621	3.15709	33.4998	6.00555	7.66356	0.767324	163.811	162.774	33881.6	3.26716	2.06414	7.79039	1	0.5	77.843	0.305621	14.7758	62.7616	205.357	1.58282	0.00468422	789.17
1310	0	4.07131	0.0114628	0.467684	0.780992	0.705635	6.54577	2.51476	25.9503	6.88185	24.5588	4.9381	44.2479	6.83442	13.8513	15.6495	549.213	274.286	37429.4	1.15307	1.12794	5.75232	1	0.5	128.509	4.55045	36.4975	87.4611	19.2203	1.02228	0.0284943	759.08
1311	0	0.886202	0.0243276	0.0708954	0.497285	0.506528	5.04931	2.82518	44.8173	14.2511	56.2941	10.3291	100.415	15.0713	15.2736	1.39875	271.486	573.327	37483.6	2.346	1.7584	7.33941	1	0.5	251.037	0.981425	53.6956	196.36	200.077	1.33417	0.00515221	783.116
1312	0	1.5608	0	0.0735986	0.258187	0.182912	3.04544	1.49396	16.5552	5.67448	25.977	5.49473	65.5536	14.068	12.9003	3.56126	311.049	238.89	37599.2	1.95018	1.24306	6.86256	1	0.5	139.938	1.6344	21.5356	116.768	71.4438	1.56885	0.0114492	776.378
1313	0	1.07579	0	0.126819	0.148302	0.17729	3.47808	1.79091	19.9959	5.21545	19.8792	3.58929	33.5709	4.62038	5.67766	2.05943	223.485	219.31	37197.7	2.10062	1.95741	7.16971	1	0.5	93.6684	1.20261	25.5905	66.8753	55.6086	1.07316	0.00921508	780.76
1314	0	1.36258	0	0	0.0903555	0.192023	3.75983	1.62536	19.2932	4.96216	17.7432	2.9121	29.6914	4.02745	15.0218	1.96549	255.784	213.028	38441.2	2.33742	1.61113	6.40569	1	0.5	85.6596	1.36258	24.9608	59.3363	43.547	1.45079	0.00768419	769.557
1315	0	0.748235	0	0	0	0.123961	1.98475	1.33849	17.9081	5.62086	22.8396	3.77452	42.6632	6.15034	15.8754	1.43055	309.143	211.195	40279.4	2.62214	1.96182	8.27277	1	0.5	103.152	0.748235	21.3553	81.0485	108.32	1.33659	0.00462747	795.34
1316	0	4.21261	0	0.0631096	0.44289	0.607808	6.47743	3.11078	47.2978	16.5867	78.8026	16.3564	194.982	34.3628	26.2817	19.7041	969.418	630.642	37066.9	1.05522	0.867695	7.19769	1	0.5	403.303	4.27572	57.9367	341.091	79.7738	1.21612	0.0203257	781.152
1317	0.0241468	1.60813	0	0.102901	0.361139	0.223793	6.30527	2.16565	24.4467	6.0477	25.0276	4.39642	40.3503	6.73383	9.78807	2.53931	291.2	243.245	37184.4	1.60308	1.01938	4.35099	1	0.5	117.794	1.73518	33.5026	82.5558	47.5777	1.5726	0.00872016	732.848
1318	0	2.21986	0	0.238624	0.465331	0.444848	5.87292	2.52908	32.6304	8.15693	33.524	5.73728	64.3014	9.08416	9.65195	3.18607	349.423	343.564	38120.5	2.13531	1.23318	6.94462	1	0.5	165.205	2.45849	41.9425	120.804	49.1375	1.73155	0.00911809	777.564
1319	0	17.8748	0.0152743	0.179125	2.287	0.374582	17.4108	6.67498	106.2	41.7292	222.663	47.6584	569.654	101.901	127.362	252.888	832.381	1496.84	41694.6	15.958	13.833	11.8936	1	0.5	1134.62	18.0692	132.948	983.605	54.4354	1.15362	0.303813	834.204
1320	0	80.2609	0.0882905	2.65263	8.63722	1.43595	67.7183	26.936	413.784	163.624	847.967	184.496	2095.66	365.097	649.089	1325.85	1903.93	5613.02	34896.4	40.0596	15.7865	11.5063	1	0.5	4258.36	83.0018	518.511	3656.84	44.0574	2.53759	0.696376	830.543
1321	0.0196923	85.6062	0.232082	4.75975	8.98162	3.33421	60.5346	20.5805	296.351	111.879	553.132	117.307	1312.03	234.273	393.419	924.279	670.649	3896.08	26019.7	11.3358	5.33647	24.378	1	0.5	2809.02	90.6178	389.782	2328.62	25.6972	2.12421	1.37819	919.998
1322	0.060701	105.523	1.05848	13.6095	28.5948	4.23109	147.189	50.0402	40.8	237.452	1127.63	230.217	2522.11	426.749	300.134	632.711	686.314	7872.3	29326	11.7465	5.23429	11.3545	1	0.5	4935.26	120.252	270.855	4544.16	37.7886	2.24415	0.921897	829.081
1323	0	64.0463	0.171068	4.05944	7.38743	3.10064	48.761	14.9034	228.409	86.2757	443.594	93.0933	1074.15	193.741	164.235	368.502	348.165	3022.15	27257.6	5.77053	2.67675	13.4203	1	0.5	2261.7	68.2768	302.561	1890.86	27.694	2.1558	1.05841	847.767
1324	0	73.9251	0.238086	5.11249	10.1055	2.96598	53.0301	17.8285	252.891	95.2437	496.862	102.539	1166.7	206.784	261.726	556.995	455.754	3379.65	27560.2	6.93903	3.26534	8.70341	1	0.5	2484.22	79.2757	336.821	2068.13	26.0878	2.12505	1.22214	800.608
1325	0	64.5985	0.161857	2.58969	6.31864	1.50511	35.9394	14.9154	208.067	78.991	432.59	92.3863	1000.58	183.012	208.453	391.933	379.779	2912.23	34920.8	10.5075	4.12259	5.88977	1	0.5	2121.66	67.35	266.746	1787.56	26.5414	2.54877	1.032	761.361
1326	0	60.5046	0.203685	3.33226	6.82748	2.01164	43.0068	14.4452	207.416	75.876	390.647	85.5864	966.906	175.073	126.137	258.539	308.937	2704.65	28548.1	5.69556	3.32121	15.8636	1	0.5	2031.84	64.0405	273.707	1694.09	26.4534	1.71491	0.836865	867.11
1327	0.0391902	61.27	0.20243	2.94051	8.63525	2.09245	50.0167	17.2163	255.678	102.267	546.532	120.23	1392.54	260.269	134.916	275.623	339.208	3702.98	27251.3	8.04598	3.43312	40.965	1	0.5	2819.93	64.4521	333.639	2421.84	37.5758	2.34363	0.81255	990.821
1328	0	0.0937357	0	0	0	0	0.323174	0.230055	7.48115	4.66314	33.314	9.96621	155.805	32.2086	4.47174	0.322638	70.9979	207.96	41722	3.72261	5.08536	3.70118	1	0.5	244.085	0.0937357	8.03438	235.957	2517.26	0.732026	0.00454433	718.252
1329	0.0179522	0.137421	0.0132227	0	0	0.0996942	0.744823	0.483241	10.5293	6.78238	54.0463	15.908	269.737	59.2095	2.28988	0.615405	103.583	304.026	42448.2	5.16503	7.06164	3.17247	1	0.5	417.709	0.168596	11.857	405.683	2406.24	0.73142	0.00594121	704.731
1330	0	0.0593258	0	0	0	0	0.499714	0.528773	13.2802	9.02481	72.0077	22.1837	329.953	68.72	8.81122	0.297108	79.5433	400.082	42354.8	3.2951	4.44732	9.59794	1	0.5	516.257	0.0593258	14.3087	501.889	8459.89	0.740917	0.00373518	810.912
1331	0	0.295448	0.014205	0	0	0.0267206	0.266265	0.35408	8.45276	5.96596	46.072	15.4285	269.218	63.4096	7.9685	0.611662	144.572	260.883	46752.4	14.0911	25.1037	9.40498	1	0.5	409.503	0.309653	9.09983	400.094	1292.07	0.561315	0.00423083	808.757
1332	0	0.0775276	0	0	0	0.0560633	0.558698	0.305168	8.86765	5.37264	40.4441	12.1763	186.472	38.0591	2.17918	0.340032	73.9415	254.332	40950	2.61478	3.40445	5.38761	1	0.5	292.389	0.0775276	9.78758	282.524	3644.18	0.768049	0.00459866	752.804
1333	0.0162602	0.140224	0	0	0	0.0900382	0.523481	0.650115	13.4774	7.26145	55.1759	17.5708	276.322	58.7698	3.68726	1.11583	138.823	327.946	42598.9	6.30836	9.00398	6.50367	1	0.5	429.998	0.156484	14.741	415.1	2652.67	0.70062	0.0080378	771.052
1334	0	0.050193	0	0	0	0.024159	0.321073	0.240246	6.71961	3.6283	31.1276	9.37901	148.703	28.953	1.50063	0.208919	58.615	179.454	41860.2	2.34217	3.04312	4.65859	1	0.5	229.146	0.050193	7.30508	221.791	4418.76	0.76966	0.00356426	739.142
1335	0	0.148611	0	0	0	0.0268094	0.356321	0.495194	10.1892	5.7749	53.3907	15.9079	240.773	49.7536	5.70703	0.27823	120.227	300.942	40303.3	5.3182	8.66418	9.48811	1	0.5	376.816	0.148611	11.0676	365.6	2460.11	0.613814	0.0023142	809.689
1336	0.0291377	0.0279341	0	0	0	0	0.401674	0.477153	14.9718	7.94312	59.1004	17.004	222.921	41.6031	2.86202	0.203945	62.7065	361.883	40150.4	2.89911	3.0968	6.48893	1	0.5	364.479	0.0570718	15.8507	348.571	6107.59	0.936164	0.00325237	770.828
1337	0.0133616	0.128252	0.00984989	0.0574987	0.133886	0	0.490183	0.585546	20.8606	11.2581	88.1514	25.5122	355.151	72.1244	12.3812	0.363287	90.976	518.611	44860.1	3.53303	3.44891	2.99085	1	0.5	574.476	0.208962	22.0702	552.197	2642.57	1.02439	0.00399321	699.657
1338	0	0.153376	0	0	0	0	0.931352	0.522378	11.7991	7.47595	56.1226	18.2494	259.55	54.2855	6.28236	0.431991	82.8398	341.894	44245.2	3.45762	4.11242	8.74803	1	0.5	409.09	0.153376	13.2528	395.684	2579.82	0.840774	0.00521478	801.142
1339	0.0128904	0.30943	0	0	0	0.0177678	0.766569	0.83435	19.3187	10.3798	91.0982	31.2513	530.821	125.068	7.45572	0.895079	185.41	486.659	44739	10.0625	12.775	8.66871	1	0.5	809.877	0.32232	20.9374	788.617	2446.69	0.78767	0.00482756	800.192
1340	0	0.106699	0.0102394	0	0.0695761	0	0.954473	0.526533	15.2392	8.85272	72.779	21.4148	320.945	64.2743	11.8623	0.338806	94.654	401.392	44925.9	3.50921	3.8397	6.85403	1	0.5	505.172	0.116939	16.7898	488.265	4175.39	0.913928	0.00357941	776.254
1341	0	0.492823	0	0.0580223	0.202844	0.0743117	0.803245	0.73184	18.7804	8.2465	53.3493	14.3376	186.664	35.5348	8.07904	1.09232	262.894	375.422	45336.2	11.3813	22.1767	4.24819	1	0.5	319.276	0.550846	20.5927	298.132	541.226	0.513209	0.004155	730.663
1342	0	0.100909	0.0129036	0.0751908	0	0	0.800522	0.67411	15.7935	8.97027	69.7846	21.6915	309.753	63.4315	15.2125	0.669384	106.191	391.688	41789.6	3.48025	4.14371	6.30293	1	0.5	491.088	0.189003	17.2681	473.631	2505.94	0.839887	0.00630358	767.968
1343	0	0.102791	0	0	0	0.0550421	0.244185	0.383495	10.4045	6.60372	54.7388	16.7337	246.124	48.3585	2.04841	0.30175	83.5806	309.462	43245.5	4.01565	4.90795	2.58261	1	0.5	383.749	0.102791	11.0873	372.559	3624.42	0.818193	0.00361029	687.251
1344	0	0.418364	0	0	0.120918	0.033101	0.661034	0.50356	16.5229	9.31372	83.1901	31.7023	583.542	152.738	4.9614	1.7219	219.447	459.716	44294.4	17.9302	15.9377	1.64124	1	0.5	878.746	0.418364	17.8415	860.486	2056.79	1.12502	0.00784652	650.851
1345	0	0.557236	0	0	0	0	0.739245	0.648669	21.094	14.1367	132.835	52.4467	935.168	230.983	12.9379	4.67375	472.619	690.087	40151.6	16.722	15.3596	2.51968	1	0.5	1388.61	0.557236	22.4819	1365.57	2450.61	1.0887	0.00988904	685.197
1346	0	0.0995857	0	0	0	0.0202395	0.673736	0.615986	12.7686	7.51684	58.9644	17.3065	262.146	52.738	3.18924	0.50504	102.611	344.561	42494.1	3.9874	5.18763	2.42326	1	0.5	412.85	0.0995857	14.0786	398.672	4003.3	0.768636	0.00492191	681.966
1347	0.0248143	0.167301	0.0183097	0	0.124267	0.0339837	0.791934	0.581875	12.6329	8.01681	68.0842	21.3588	362.057	86.5282	13.6305	0.622552	136.484	361.991	46201.6	15.8342	22.9599	2.68138	1	0.5	560.42	0.210425	14.1649	546.045	2594.97	0.689646	0.00456136	690.394
1348	0	82.0872	0.175322	3.77661	8.98789	1.14791	50.471	19.6906	296.397	115.394	580.495	125.736	1390.51	241.829	117.478	232.773	516.232	3950.78	33625.3	14.3083	6.45359	7.18856	1	0.5	2916.7	86.0391	376.695	2453.97	28.5215	2.21711	0.450907	781.024
1349	0.680967	88.9744	0.554352	6.67858	10.2458	2.20424	74.5993	29.533	449.378	180.972	957.795	208.528	2341.85	416.953	65.784	113.427	377.259	6395.76	36435.9	33.8867	11.0147	8.36881	1	0.5	4768.95	96.8883	565.96	4106.1	42.3797	3.07651	0.300662	796.534
1350	0.0281147	21.397	0.125201	2.67775	4.82651	1.39816	32.0988	11.4389	167.698	64.2146	325.16	67.4995	760.02	134.433	406.227	736.23	808.342	2265.11	35055	8.64296	3.36306	15.0099	1	0.5	1593.02	24.2281	217.461	1351.33	55.7752	2.56997	0.91079	860.639
1351	0	14.4993	0.294335	2.82049	7.00843	1.59904	37.8088	11.4536	169.773	67.5779	347.157	72.2708	829.172	147.833	629.839	1175.54	1325.48	2301.65	27849.6	4.26728	1.53764	30.2499	1	0.5	1709.27	17.6141	227.643	1464.01	83.1156	2.77521	0.886879	948.458
1352	0.0300156	32.8594	0.0890682	3.11709	7.27158	1.45164	40.0618	13.8836	199.635	74.0353	362.605	74.9525	809.016	136.167	349.743	635.293	878.823	2469.25	31931.6	10.0042	3.98116	16.0215	1	0.5	1755.18	36.0955	262.304	1456.78	40.3589	2.51289	0.722891	868.275
1353	0.901566	102.032	0.59645	6.8182	12.338	2.67862	73.9071	30.0572	444.089	173.711	899.094	193.948	2196.61	380.72	130.393	241.09	331.824	6126.77	34154.2	33.3989	11.2167	15.0307	1	0.5	4517.5	110.349	563.07	3844.08	34.8358	2.97762	0.726559	860.8
1354	2.15543	89.8953	1.17911	8.8109	11.9517	2.58002	68.7198	25.2001	351.581	134.113	671.529	144.002	1624.98	276.8	642.066	1235.2	1436.22	4666.17	32326.7	18.2705	6.28208	18.4263	1	0.5	3413.5	102.041	460.033	2851.42	27.944	2.90835	0.860032	885.003
1355	0.0264154	28.1727	0.0976999	2.16505	4.92066	1.8753	35.3379	12.5913	174.326	68.0467	365.186	78.1816	909.715	169.21	291.108	520.365	632.68	2414.47	33649.7	6.54886	3.21507	6.18775	1	0.5	1849.85	30.4618	229.051	1590.34	52.2076	2.03693	0.822478	766.163
1356	0.0696155	224.956	0.761593	16.0841	24.6591	3.95087	111.644	35.2746	455.563	160.658	760.716	148.499	1573.24	271.632	122.323	260.218	139.212	5169.62	23479.1	6.42143	1.7158	19.2981	1	0.5	3787.7	241.871	631.092	2914.74	12.0508	3.74252	1.86923	890.64
1357	0.0683503	46.0383	0.517497	6.62391	14.8373	4.93674	87.8701	32.1043	447.568	166.465	818.732	164.965	1795.54	309.195	100.612	203.42	196.106	5669.18	24766.5	5.8568	1.65969	28.4675	1	0.5	3895.46	53.2481	587.316	3254.9	61.1271	3.52884	1.03729	940.313
1358	0	0.385935	0	0	0.091682	0.0244145	0.711992	0.656832	18.1007	11.9613	104.651	34.5331	564.249	119.505	16.2423	1.61119	285.018	532.243	43270.8	10.7682	7.80211	7.263	1	0.5	854.872	0.385935	19.5856	834.9	2163.32	1.38016	0.00565295	782.061
1359	0.0743194	0.502791	0.0736002	0.429329	0	0.166607	0.649817	0.50345	14.6134	11.2183	96.6903	30.7242	500.616	106.807	17.9301	2.87693	219.528	488.829	42842.8	7.12782	3.93685	3.23001	1	0.5	763.069	1.08004	15.9333	746.056	690.767	1.81054	0.0131051	706.289
1360	0	0.769282	0	0	0.473274	0.188933	3.18525	1.42794	26.3397	9.54011	40.3547	7.98552	80.4686	13.4442	4.25362	1.12493	173.989	378.229	38075	2.92442	2.59128	2.30239	1	0.5	184.178	0.769282	31.6151	151.793	197.318	1.12856	0.00646551	677.761
1361	0.0325349	0.391902	0.0120478	0	0.245953	0.0218166	0.71282	0.556579	16.3483	8.90846	60.1407	16.6314	232.995	44.769	7.49535	0.83481	162.471	389.966	40949.2	4.29529	2.5873	4.56915	1	0.5	381.767	0.436485	17.8854	363.445	832.663	1.66015	0.0051382	737.348
1362	0.0311521	0.270112	0	0.134521	0.156967	0	0.682655	0.414416	13.3907	9.49563	75.3847	25.9799	417.615	94.455	11.768	2.4016	189.071	402.991	42318.2	3.84341	2.92224	4.92269	1	0.5	638.011	0.435784	14.6448	622.931	1429.45	1.31523	0.0127021	744.28
1363	0.140008	0.606837	0	0.302212	0	0.281513	0.306866	0.399034	13.2855	10.2087	80.4287	28.0407	514.301	119.265	17.3394	1.13635	161.597	395.105	44624.9	5.61352	3.51098	6.33289	1	0.5	767.566	1.04906	14.2729	752.244	717.067	1.59885	0.00703202	768.434
1364	0.159167	0.481227	0	0.0980352	0.114428	0.15221	3.09279	1.23729	22.3874	8.07836	36.2713	6.93868	76.1767	11.2235	2.97823	1.13359	126.381	330.843	36346	1.99093	2.6659	5.09946	1	0.5	166.411	0.738429	26.9841	138.688	187.816	0.746813	0.00896958	747.595
1365	0	0.0725027	0	0	0.151722	0.0201803	0.794332	0.801219	15.9378	7.3633	36.1731	8.44773	88.8656	14.0974	12.7404	0.556371	129.778	318.126	32168.4	4.4815	1.41999	2.26778	1	0.5	172.725	0.0725027	17.7052	154.947	2137.12	3.15601	0.00428711	676.523
1366	0.0351432	0.743241	0.025965	0.0757032	0.265124	0.117541	1.46573	0.500033	14.8449	7.93537	46.9861	11.9203	153.569	28.1897	10.425	1.4134	157.145	339.35	39093.9	4.35483	2.35819	3.58267	1	0.5	266.674	0.880053	17.1933	248.601	282.484	1.84668	0.00899423	715.366
1367	0.025	9.03	0.049	0.8	1.69	0.14	9.98	3.89	50.1	19.7	98.6	23.6	242	50.3	220	69.9	359	638	12464	4.33	2.085	0.83	1	1	509.904	9.904	65.8	434.2	43.8409	2.07674	0.194708	555.59
1368	0.044	5.75	0.48	6.69	12.6	1.18	43.7	10.9	114	35.8	148	28.5	254	51.6	390	275	473	1125	8535	1.47	0.587	9.15	1	1	713.244	12.964	182.38	517.9	39.9491	2.50426	0.581395	737.466
1369	0.0058	3.87	0.098	1.51	2.51	0.39	13.4	3.4	37.2	12.4	55.5	11.5	106	22.3	184	108	270	412	9395	0.73	0.394	8.75	1	1	270.084	5.4838	56.9	207.7	37.8752	1.85279	0.4	733.352
1370	0.025	7.65	0.079	1.37	2.87	0.13	12.1	3.65	40.7	14.7	63.4	12.6	112	22	136	113	195	443	10126	1.68	0.805	8.79	1	1	293.274	9.124	59.45	224.7	24.6274	2.08696	0.579487	733.77
1371	0.024	7.96	0.28	5.42	6.92	0.4	26.9	7.32	74.9	25.1	102	19.2	166	31.6	90.1	93.5	101	757	9326	1.17	0.463	6.84	1	1	474.024	13.684	116.44	343.9	25.1315	2.527	0.925743	711.275
1372	0.092	50.3	0.47	7.49	11.2	2.75	44.8	13	148	53.4	251	54.9	552	114	308	819	761	1826	9176	3.98	1.649	4.15	1	1	1303.4	58.352	219.75	1025.3	17.5709	2.41358	1.07622	669.329
1373	2.22	70.4	1.87	20.5	23.2	5.39	86.1	24.9	259	91.1	405	83.8	800	162	374	1091	778	2966	9852	4.08	1.317	3.9	1	1	2035.48	94.99	398.59	1541.9	16.2322	3.09795	1.40231	664.362
1374	4.29	21.4	1.73	9.49	6.77	0.95	25.4	8.25	90.6	34	153	31.5	295	58.1	125	85.8	169	1044	10207	1.17	0.584	1.95	1	1	740.48	36.91	131.97	571.6	15.4863	2.00342	0.507692	612.301
1375	2.16	22	1.81	18.8	15.8	2.66	48.1	13.2	135	47.2	210	43.7	421	86.9	113	381	744	1520	9616	2.87	1.227	4.73	1	1	1068.33	44.77	214.76	808.8	18.0657	2.33904	0.512097	679.961
1376	0.02	1.51	0.088	2.35	4.61	0.16	26.1	8.75	100	39.1	174	36.3	330	66.5	59.8	78.9	192	1182	9481	0.5	0.384	10.4	1	1	789.488	3.968	139.62	645.9	162.777	1.30208	0.410938	749.439
1377	0	3.81	0.024	0.62	2.96	0.16	22.7	8.51	89.6	27.2	103	18.2	164	31.4	48.7	55.3	352	857	12746	5.04	4.2	15.4	1	1	472.184	4.454	123.93	343.8	77.189	1.2	0.157102	787.98
1378	3.21	30.9	1.7	9.84	9.17	0.27	45.1	22.2	318	135	655	144	1327	253	168	300	1114	4268	13035	5.56	3.391	14.6	1	1	2954.39	45.65	394.74	2514	55.0712	1.63963	0.2693	782.573
1379	0	3.66	0.18	3.44	5.92	0.25	29.4	9.31	99.9	36.5	154	29.1	258	49.9	24.2	75.4	183	1081	10301	1.08	0.619	13.9	1	1	679.56	7.28	144.78	527.5	72.4588	1.74475	0.412022	777.641
1380	0.22	28	0.18	2.52	4.38	1.7	27.4	9.13	104	37.8	171	37.3	365	78.7	120	502	769	1250	9206	6.32	1.834	2.39	1	1	867.33	30.92	146.61	689.8	22.3092	3.44602	0.652796	626.973
1381	0.006	0.42	0	0.15	1.01	1.06	5.5	0.74	5.91	1.23	3.93	0.64	4.32	0.85	27.8	2.14	354	43.7	11793	0.16	0.032	2.05	1	1	25.766	0.576	14.22	10.97	19.0451	5	0.0060452	615.863
1382	0	0.46	0.018	0.48	1.99	1.62	9.31	1.56	8.73	2.02	5.75	0.81	5.74	0.97	23.8	1.52	316	71.7	11085	0.095	0.02	1.9	1	1	39.458	0.958	23.21	15.29	15.9603	4.75	0.00481013	610.462
1383	0.0062	0.23	0	0	0.23	0.21	1.88	0.4	2.85	0.6	1.82	0.25	1.76	0.33	14.2	0.89	190	20.5	11515	0.14	0.025	0.041	1	1	10.5662	0.2362	5.57	4.76	20.1524	5.6	0.00468421	403.076
1384	0	0.44	0.004	0.25	1.56	1.51	9.61	1.76	11	2.3	7.06	1.02	6.86	1.12	23.2	1.61	306	82.1	11536	0.09	0.019	1.99	1	1	44.494	0.694	25.44	18.36	26.4553	4.73684	0.00526144	613.744
1385	0.059	0.5	0.001	0.3	1.32	0.87	4.63	0.63	4.14	1.15	2.8	0.47	3.3	0.53	17.1	1.55	226	39.6	11059	0.06	0.002	1.06	1	1	20.7	0.86	11.59	8.25	9.59302	30	0.00685841	571.074
1386	0.025	0.27	0.004	0.1	1.54	1.11	8.58	1.26	9.02	2.18	6.23	1.1	7.73	1.51	18.7	1.97	244	78.2	11186	0.085	0.004	3.48	1	1	40.659	0.399	21.51	18.75	46.9925	21.25	0.00807377	655.387
1387	0	0.3	0	0.13	1.59	1.51	10.6	2.17	12.8	2.69	8.13	1.17	9.1	1.6	22.9	1.09	300	95.9	11159	0.07	0.024	1.35	1	1	51.79	0.43	28.67	22.69	52.7674	2.91667	0.00363333	586.962
1388	0	0.23	0	0.049	0.74	0.75	5.17	1	5.1	1.31	3.8	0.46	3.46	0.65	15.5	0.98	199	45.4	11788	0.11	0.02	1.9	1	1	22.719	0.279	12.76	9.68	34.6953	5.5	0.00492462	610.462
1389	0.003	0.4	0.013	0.25	1.63	1.97	13.8	2.44	15.1	3.1	9.97	1.56	13.7	2.62	21.5	1.6	282	105	11182	0.096	0.015	1.1	1	1	66.556	0.666	34.94	30.95	46.4715	6.4	0.00567376	573.469
1390	0.0076	0.58	0	0.063	1.28	1.08	9.74	1.45	7.63	1.67	5.36	0.84	5.95	1.06	29.8	2.1	401	56.6	10624	0.16	0.025	0.63	1	1	36.7106	0.6506	21.18	14.88	22.8712	6.4	0.00523691	538.805
1391	0	0.39	0	0.26	2.11	1.75	11.6	1.87	11.9	2.62	7.89	1.15	9.7	1.52	23.6	1.19	321	95	11764	0.048	0.027	1.54	1	1	52.76	0.65	29.23	22.88	35.2	1.77778	0.00370717	595.867
1392	0.063	0.28	0.02	0.048	0.38	0.27	1.93	0.22	2.04	0.31	1.04	0.17	1.42	0.24	13.4	2.45	175	14.2	12230	0.091	0.044	2.42	1	1	8.431	0.411	4.84	3.18	7.73723	2.06818	0.014	627.889
1393	0.0018	0.43	0.004	0.48	1.93	1.78	9.22	1.26	8.42	1.99	5.99	1	6.76	1.13	24.9	2.86	339	67.7	11707	0.11	0.011	0.45	1	1	40.3958	0.9158	22.61	16.87	18.4211	10	0.00843658	519.219
1394	0	0.32	0.016	0.14	0.91	1.12	7.19	1.26	8.46	1.82	5.62	0.88	5.39	0.88	19.6	1.35	273	64.7	11458	0.069	0.027	1.01	1	1	34.006	0.476	18.94	14.59	30.6513	2.55556	0.00494505	567.97
1395	0.0058	0.37	0.0059	0.26	1.07	1.01	5.11	0.9	5.6	1.2	4.42	0.62	5.03	1.16	21.6	1.49	297	44.2	12065	0.1	0.028	1.66	1	1	26.7617	0.6417	13.69	12.43	19.3704	3.57143	0.00501684	601.025
1396	0.26	2.95	0.18	1.21	2.93	2.09	11.2	1.71	11.5	2.78	8.85	1.22	9.2	1.42	32.2	2.87	452	98.4	11625	0.11	0.047	11.7	1	1	57.5	4.6	29.43	23.47	5.10217	2.34043	0.00634956	760.706
1397	0	0.39	0.0078	0.2	1.43	1.12	7.58	1.01	7.48	1.64	4.27	0.62	4.51	0.82	18.3	1.22	258	54.7	11677	0.15	0.034	1.08	1	1	31.0778	0.5978	18.62	11.86	19.8394	4.41176	0.00472868	572.281
1398	0	0.36	0	0.27	1.86	1.88	13.6	2.51	15.4	3.43	10.3	1.55	13.7	2.57	30.3	1.87	419	108	11445	0.057	0.042	1.29	1	1	67.43	0.63	35.25	31.55	50.0794	1.35714	0.00446301	583.93
1399	0.071	0.88	0.07	0.25	1.55	1.18	6.54	0.83	5.1	0.8	2.29	0.32	2.08	0.31	33.5	3.39	459	33.1	11637	0.13	0.034	1.67	1	1	22.271	1.271	15.2	5.8	4.56334	3.82353	0.00738562	601.44
1400	0	0.78	0	0.16	2.39	1.95	11.9	2.01	10.2	2.37	6.34	0.93	6.46	1.27	51.9	3.56	724	79.3	11227	0.24	0.038	1.65	1	1	46.76	0.94	28.45	17.37	18.4787	6.31579	0.00491713	600.607
1401	15.3	23.9	5.35	24.7	7.18	2.39	10.8	1.21	6.53	1.2	2.91	0.4	2.83	0.51	23.1	1.65	308	41.4	11165	0.12	0.028	1	1	1	105.21	69.25	28.11	7.85	0.113357	4.28571	0.00535714	567.333
1402	0.081	0.84	0.085	0.86	2.49	2.04	11.1	1.63	9.82	2.62	8.07	1.17	8.62	1.4	36.2	4.31	479	87.2	10711	0.18	0.034	0.37	1	1	50.826	1.866	27.08	21.88	11.7256	5.29412	0.00899791	508.253
1403	0	0.71	0	0.31	2.18	1.67	10.8	2.05	12.5	2.7	8.23	1.25	9.55	1.69	37.5	2.9	546	89.6	10840	0.17	0.055	2.39	1	1	53.64	1.02	29.2	23.42	22.9608	3.09091	0.00531136	626.973
1404	0	0.5	0.026	0.1	1.24	1.59	7.46	1.2	7.6	1.63	4.57	0.57	4.13	0.68	29	3.49	408	53.3	10580	0.15	0.029	1.08	1	1	31.296	0.626	19.09	11.58	18.4984	5.17241	0.00855392	572.281
1405	0.01	0.386	0.009	0.136	0.29	0.28	1.89	0.48	5.25	1.77	6.82	1.42	12.1	2.22	10.9	3.73	204	62.2	12486	0.17	0.033	5.01	1	1	33.061	0.541	8.19	24.33	44.9723	5.15152	0.0182843	684.712
1406	0.006	0.127	0	0	0.27	0.23	1.94	0.4	4.62	1.43	6.74	1.54	14.7	2.28	4.55	1.16	88.8	55.2	12093	0.13	0.062	0.28	1	1	34.283	0.133	7.46	26.69	200.677	2.09677	0.0130631	493.153
1407	0.034	0.289	0.018	0.158	0.27	0.16	1.46	0.32	4.56	1.48	5.89	1.11	10	1.86	7.67	0.47	161	51.1	12734	0.18	0.068	4.23	1	1	27.609	0.499	6.77	20.34	40.7615	2.64706	0.00291925	670.866
1408	0	0.015	0	0	0	0.057	0.86	0.55	10.2	5.39	33.3	9.56	120	25.9	13.9	0.28	276	203	11049	0.2	0.05	0.1	1	1	205.832	0.015	11.667	194.15	12943.3	4	0.00101449	442.094
1409	0.015	0.141	0	0.05	0.15	0.14	2.03	0.68	7.3	2.86	12.3	2.44	24	4.22	5.06	2.24	95.2	101	11982	0.17	0.03	1.41	1	1	56.326	0.206	10.3	45.82	222.427	5.66667	0.0235294	589.883
1410	0.005	0.369	0	0.089	0.33	0.27	3.04	0.6	5.48	1.38	4.26	0.81	6.67	0.88	5.43	0.12	115	46.6	12130	0.17	0.024	1.75	1	1	24.183	0.463	9.72	14	30.2376	7.08333	0.00104348	604.691
1411	0.011	0.285	0	0.051	0.31	0.22	2.05	0.5	4.07	1.11	3.06	0.67	5.56	0.88	14.5	2.53	290	34.9	11844	0.16	0.061	0.96	1	1	18.777	0.347	7.15	11.28	32.5072	2.62295	0.00872414	564.732
1412	0.012	0.164	0.025	0.093	0.3	0.2	2.05	0.88	12.1	4.41	17.7	4.05	42.9	7.54	17.2	0.4	364	145	11976	0.26	0.08	0.38	1	1	92.424	0.294	15.53	76.6	260.544	3.25	0.0010989	509.729
1413	0	0.283	0	0.014	0.32	0.23	2.65	0.77	8.68	3.16	13.9	2.74	24.3	4.07	10	1.72	192	113	11632	0.26	0.066	2.21	1	1	61.117	0.297	12.65	48.17	162.189	3.93939	0.00895833	621.27
1414	0.006	0.21	0	0.067	0.4	0.37	2.99	0.7	7.93	2.7	9.78	2.13	19.5	3.14	9.54	1.9	184	95.5	11710	0.15	0.027	1.03	1	1	49.923	0.283	12.39	37.25	131.625	5.55556	0.0103261	569.227
1415	0.993	30.717	2.481	17.2	14.6	5.13	25.2	6.91	62.4	13.3	40.9	7.87	67.9	9.58	8.58	2.18	172	292	11583	0.28	0.063	33.7	1	1	305.181	51.391	114.24	139.55	2.71546	4.44444	0.0126744	874.25
1416	0.014	0.317	0	0.207	0.58	0.44	3.91	1.35	15	5.24	20.5	4.43	39.1	6.24	13.3	3.96	243	163	11856	0.37	0.141	2.45	1	1	97.328	0.538	21.28	75.51	140.353	2.62411	0.0162963	628.795
1417	0	0.826	0.014	0.183	2.11	1.33	8.31	1.24	9.42	2.16	6.74	1.16	9.84	1.45	9.12	1.57	180	68.2	11246	0.14	0.059	1.65	1	1	44.783	1.023	22.41	21.35	20.87	2.37288	0.00872222	600.607
1418	0	0.254	0.004	0.099	0.35	0.56	4.14	0.93	7.64	2.2	6.92	1.47	12.8	1.94	6.31	0.44	119	75.1	11900	0.14	0.039	1.31	1	1	39.307	0.357	13.62	25.33	70.9524	3.58974	0.00369748	584.954
1419	0	0.155	0	0.035	0.13	0.17	1.29	0.41	4.33	1.41	6.15	1.28	11.3	1.67	31.6	230	431	53.3	10926	0.13	0.048	2.02	1	1	28.33	0.19	6.33	21.81	114.789	2.70833	0.533643	614.81
1420	0	0.093	0.007	0.046	0.16	0.2	1.69	0.79	9.19	4.49	19	3.97	35.7	6.35	13.6	0.52	279	145	11618	0.21	0.161	0.66	1	1	81.686	0.146	12.03	69.51	476.096	1.30435	0.0018638	541.589
1421	0	0.313	0	0.025	0.21	0.15	1.11	0.29	2.49	0.54	2.09	0.46	5.09	0.92	21.4	8.95	393	23.2	11313	0.17	0.077	1.26	1	1	13.688	0.338	4.25	9.1	26.9231	2.20779	0.0227735	582.369
1422	0.034	0.316	0.004	0.093	0.14	0.17	2.37	0.82	10.4	3.65	13.8	2.89	26.6	4.36	45.7	4.89	809	122	11622	0.26	0.101	1.55	1	1	65.647	0.447	13.9	51.3	114.765	2.57426	0.0060445	596.31
1423	0.011	0.322	0.002	0.132	0.49	0.46	4.13	1.06	9.43	2.45	7.94	1.65	12.9	1.99	14.1	2.2	269	87.5	11421	0.15	0.042	0.3	1	1	42.967	0.467	15.57	26.93	57.666	3.57143	0.00817844	496.836
1424	0.014	0.407	0.007	0.069	0.36	0.3	3.29	1.03	12.9	4.19	15.6	2.73	22.2	3.33	5.53	1.15	104	131	11461	0.61	0.136	1.61	1	1	66.427	0.497	17.88	48.05	96.6801	4.48529	0.0110577	598.915
1425	0	0.059	0	0.024	0.15	0.13	1.1	0.68	12	6.7	36.8	10.4	124	26.8	12.7	1.17	256	230	11159	0.32	0.08	2.01	1	1	218.843	0.083	14.06	204.7	2466.27	4	0.00457031	614.456
1426	0	0.038	0	0	0.12	0.061	1.02	0.42	8.3	3.97	22.5	6.15	73.5	15.8	11.7	3.3	218	146	10410	0.2	0.073	0.74	1	1	131.879	0.038	9.921	121.92	3208.42	2.73973	0.0151376	548.519
1427	0.084	0.042	0	0	0	0.066	0.65	0.3	6.19	3.02	18.7	5.33	60.5	12.9	14.2	5.15	271	116	10527	0.19	0.108	0.56	1	1	107.782	0.126	7.206	100.45	797.222	1.75926	0.0190037	531.839
1428	0	0.179	0	0.084	0.17	0.21	2.17	0.49	5.86	2.87	13.8	3.44	41.7	8.92	13.3	2.5	254	98	11989	0.32	0.073	2.62	1	1	79.893	0.263	8.9	70.73	268.935	4.38356	0.00984252	633.76
1429	0	0.048	0	0	0	0.075	0.89	0.51	7.83	3.96	19.9	5	59.9	12.3	29.2	14.4	539	131	10742	0.42	0.067	0.32	1	1	110.413	0.048	9.305	101.06	2105.42	6.26866	0.0267161	500.314
1430	0.035	7.53	0.077	0.71	1.47	0.16	8.4	3.34	49.6	24.8	152	41.8	462	105	273	155	889	867	8705	18.2	9.58	12.1	1	0.5	856.922	8.352	62.97	785.6	94.0613	1.89979	0.174353	836.116
1431	0.076	21	0.23	3.68	6.79	0.45	40.7	13.5	157	59.2	260	51.2	448	85.1	100	185	445	1758	8851	7.84	3.46	13.5	1	0.5	1146.93	24.986	218.44	903.5	36.1602	2.2659	0.41573	848.441
1432	0.004	3.24	0.006	0.22	0.59	0.28	4.93	2.09	22.1	6.11	21	3.27	23.8	4.08	7.84	1.6	192	199	11483	1.11	0.43	3.54	1	0.5	91.72	3.47	29.99	58.26	16.7896	2.5814	0.00833333	714.308
1433	0.066	13.9	0.033	0.37	0.78	0.26	6.43	3.12	48.1	23.1	135	33.6	344	67.2	232	50.1	872	801	12798	15.4	15.8	8.86	1	0.5	675.959	14.369	58.69	602.9	41.9584	0.974684	0.0574541	802.472
1434	0.048	11.9	0.2	3.33	5.36	0.41	30.1	9.84	118	49.4	245	53.7	530	114	140	128	580	1524	8062	14.1	3.23	13.5	1	0.5	1171.29	15.478	163.71	992.1	64.0974	4.36533	0.22069	848.441
1435	0.006	7.6	0.018	0.51	1.04	0.25	6.88	2.6	36	15.1	81	19	191	40.2	54.8	75	547	498	11422	5.33	2.79	14.5	1	0.5	401.204	8.134	46.77	346.3	42.5744	1.91039	0.137112	856.633
1436	1.16	49.1	0.43	3.63	4.82	0.64	32.7	13.8	193	81.3	397	86.6	775	135	641	932	1838	2710	13386	26.3	19.8	26.6	1	0.5	1774.18	54.32	244.96	1474.9	27.1521	1.32828	0.507073	931.34
1437	0.011	3.68	0.005	0.14	0.43	0.27	4.98	2.23	22.4	6.13	22.1	3.68	27.2	5.26	15.2	9.65	342	205	11350	1.38	0.59	8.04	1	0.5	98.516	3.836	30.31	64.37	16.7805	2.33898	0.0282164	792.4
1438	0.37	12.7	0.38	4.98	8.36	0.6	52.7	16.8	198	76.2	332	63.9	561	109	167	191	660	2328	8997	11.4	5.99	11.1	1	0.5	1436.99	18.43	276.46	1142.1	61.9696	1.90317	0.289394	826.595
1439	0.041	13.7	0.2	3.43	6.31	0.44	38.5	11.9	140	51.3	218	41.3	345	64	70.9	100	239	1526	9918	4.26	1.98	5.69	1	0.5	934.121	17.371	197.15	719.6	41.4254	2.15152	0.41841	758.031
1440	0	2.86	0	0.15	0.73	0.21	4.42	1.92	18.7	5.21	18.5	3.13	24	4.09	12.4	2.3	320	174	13554	0.93	0.34	3.93	1	0.5	83.92	3.01	25.98	54.93	18.2492	2.73529	0.0071875	723.615
1441	0.14	5.97	0.079	0.75	0.8	0.29	6.2	3.03	61.8	40.9	303	88.8	953	196	516	296	1898	1638	11562	22.4	11.4	46.9	1	0.5	1660.76	6.939	72.12	1581.7	227.944	1.96491	0.155954	1010.69
1442	0.012	3.99	0.017	0.12	0.67	0.35	5.63	2.33	23.9	6.61	22.5	3.65	28.7	4.93	11.2	5.7	282	214	12846	1.33	0.43	7.58	1	0.5	103.409	4.139	32.88	66.39	16.0401	3.09302	0.0202128	786.382
1443	0.013	7.23	0.035	0.58	0.92	0.14	6.01	2.25	34.6	18.1	110	27.8	291	67.8	161	103	504	610	9068	6.81	4.87	9.07	1	0.5	566.478	7.858	43.92	514.7	65.5001	1.39836	0.204365	804.929
1444	0.12	12.1	0.053	0.49	1.05	0.22	10.3	4.54	64.8	28.7	147	34.2	321	60.4	109	128	578	955	12992	6.3	4.25	10.4	1	0.5	684.973	12.763	80.91	591.3	46.3292	1.48235	0.221453	819.513
1445	0.63	9.08	0.35	2.05	1.46	0.5	6.05	2.58	36.7	18.7	120	35.3	416	103	186	109	1741	668	13706	10.9	12.2	29.8	1	0.5	752.4	12.11	47.29	693	57.2254	0.893443	0.0626077	946.438
1446	0.13	41.3	0.39	6.85	10.9	0.76	62	21.9	281	107	481	96.4	805	145	238	486	621	3391	9381	12.8	3.98	15.8	1	0.5	2059.63	48.67	376.56	1634.4	33.5813	3.21608	0.782609	866.637
1447	0.007	4.98	0.007	0.23	0.67	0.4	5.69	1.98	19.3	5.07	17.3	2.94	23.8	4.44	14.7	7.1	339	161	12609	1.14	0.47	5.66	1	0.5	86.814	5.224	28.04	53.55	10.2508	2.42553	0.020944	757.522
1448	0.19	47.6	0.28	3.39	7.25	0.57	46.6	16.4	199	74.6	325	63.9	531	96.3	147	264	480	2258	8669	15.1	5.98	11	1	0.5	1412.08	51.46	269.82	1090.8	21.197	2.52508	0.55	825.606
1449	0.039	47.4	0.31	5.12	9.09	0.45	53.6	17.2	215	78.7	336	63.4	540	95.5	195	256	412	2419	8437	12.7	4.73	7.62	1	0.5	1461.81	52.869	295.34	1113.6	21.0634	2.68499	0.621359	786.917
1450	0.15	29.1	0.41	5.59	10.6	0.77	65.8	23.4	296	115	520	104	888	161	339	526	951	3794	8537	10.5	3.35	22.8	1	0.5	2219.82	35.25	396.57	1788	50.7234	3.13433	0.553102	911.44
1451	0.002	3.96	0.008	0.24	0.5	0.33	6.05	2.52	25.9	7.09	25.2	4.03	32.2	5.31	13.1	4.8	305	228	12298	1.36	0.56	8.96	1	0.5	113.34	4.21	35.3	73.83	17.5368	2.42857	0.0157377	803.648
1452	0.026	3.92	0.023	0.27	0.74	0.48	5.7	2.15	22.6	6.27	22.1	3.78	29.9	5.62	14	5.1	332	201	13175	1.45	0.63	65.7	1	0.5	103.579	4.239	31.67	67.67	15.9637	2.30159	0.0153614	1063
1453	0.14	2.82	0.061	0.55	0.84	0.55	10.2	4.63	68.4	29.8	164	44.4	508	114	89	27.47	441	955	12545	3.39	3.09	29.3	1	0.5	948.391	3.571	84.62	860.2	240.885	1.09709	0.0622902	944.166
1454	0.076	3.55	0.039	0.34	1.25	0.53	9.17	4.77	70.4	33.1	188	51.5	614	137	178	9.9	799	1063	12276	10.21	11.48	8.9	1	0.5	1113.72	4.005	86.12	1023.6	255.581	0.889373	0.0123905	802.943
1455	0.017	2.34	0.014	0.16	0.6	0.29	5.96	3.81	63.5	27.3	147	37.1	406	86	48	2.05	237	887	12621	3.35	2.6	7	1	0.5	780.091	2.531	74.16	703.4	277.914	1.28846	0.00864979	778.358
1456	0.044	2.98	0.074	0.53	1.58	0.82	13.3	6.7	92.1	40.4	223	61.5	693	152	66.7	12.48	389	1262	11712	2.87	1.81	11.5	1	0.5	1288.03	3.628	114.5	1169.9	322.464	1.58564	0.0320823	830.483
1457	0.16	3.35	0.097	0.86	2.17	1.26	13.8	7.09	91.8	37.1	206	56.6	642	141	65	20.63	451	1178	11735	3.44	3.05	19.7	1	0.5	1203.29	4.467	116.12	1082.7	242.377	1.12787	0.0457428	893.171
1458	0.75	4.05	0.33	1.67	1.52	0.72	9.06	4.46	63.6	26.9	143	36.2	390	86	175	10.74	751	915	12455	1.93	1.48	7.42	1	0.5	768.26	6.8	79.36	682.1	100.309	1.30405	0.0143009	784.22
1459	0.38	3.42	0.045	0.47	0.59	0.31	6.23	3.88	68.8	34	197	56	638	142	121	5.72	351	1086	11872	9.46	8.47	3.96	1	0.5	1151.12	4.315	79.81	1067	247.277	1.11688	0.0162963	724.299
1460	0.012	2.33	0.008	0.16	0.5	0.27	4.48	2.23	27.4	8.75	30.9	5.22	39.4	6.73	7.86	3.68	199	279	12022	0.52	0.18	7.38	1	0.5	128.39	2.51	34.88	91	36.255	2.88889	0.0184925	783.673
1461	0.63	8.66	0.28	1.92	1.45	0.77	9.86	4.51	64.5	27.3	146	37.1	423	104	153	71.6	734	959	12548	4.24	3.23	9.19	1	0.5	829.98	11.49	81.09	737.4	64.1775	1.31269	0.0975477	806.313
1462	0.086	4.69	0.016	0.21	0.37	0.22	4.41	2.41	38.9	19.1	110	30	341	81.1	190	13.6	600	649	12278	3.52	3.45	6.14	1	0.5	632.512	5.002	46.31	581.2	116.194	1.02029	0.0226667	765.406
1463	0.07	5.05	0.04	0.49	0.99	0.39	8.12	4.14	60.6	27.8	143	37.9	411	91.6	98.3	49.2	416	917	12437	3.38	3.49	8.17	1	0.5	791.19	5.65	74.24	711.3	125.894	0.968481	0.118269	794.051
1464	0.02	3.1	0.025	0.22	0.62	0.29	6.14	3.87	66.7	32.9	191	53.5	613	137	95.1	3.64	280	1053	11607	2.78	1.35	2.76	1	0.5	1108.38	3.365	77.62	1027.4	305.319	2.05926	0.013	692.827
1465	0.137	2.44	0.16	0.36	0.58	0.28	5.63	3.16	51.1	21.5	105	25.1	260	54.6	45.4	2.32	191	704	11757	1.8	1.27	5.68	1	0.5	530.047	3.097	60.75	466.2	150.533	1.41732	0.0121466	757.862
1466	1.35	4.73	0.57	3.51	2.43	0.73	10.4	4.9	73.6	33.1	187	52.5	611	142	256	7.45	894	1071	12299	4.32	8.25	5.02	1	0.5	1127.82	10.16	92.06	1025.6	100.945	0.523636	0.00833333	746.117
1467	0.023	2.45	0.018	0.19	0.78	0.33	6.49	4.04	66.2	31	181	50.5	586	131	174	6.21	492	996	11743	1.74	0.85	4.46	1	0.5	1060.02	2.681	77.84	979.5	365.349	2.04706	0.012622	735.119
1468	0.061	3.65	0.024	0.32	0.81	0.4	7.33	4.32	76.7	38.5	232	67	780	171	103	6.46	298	1281	11969	3.34	2.13	5.15	1	0.5	1382.12	4.055	89.56	1288.5	317.756	1.56808	0.0216779	748.526
1469	0.012	4.31	0.019	0.11	0.61	0.3	6.64	3.97	71.9	34.9	206	55.9	638	139	108	6.35	322	1166	11384	2.31	1.14	4.54	1	0.5	1161.67	4.451	83.42	1073.8	241.249	2.02632	0.0197205	736.757
1470	0.003	2.55	0.01	0.16	0.37	0.39	5.28	2.74	34.5	11.1	38.1	6.43	46.9	8.42	7.39	3.74	183	339	13153	0.55	0.25	6.6	1	0.5	156.953	2.723	43.28	110.95	40.7455	2.2	0.0204372	772.505
1471	0.027	3.16	0.009	0.25	0.54	0.29	5.02	2.62	34.7	12.4	49.6	9.5	78.5	13.5	5.82	3.65	128	391	11856	0.61	0.3	9.24	1	0.5	210.116	3.446	43.17	163.5	47.4463	2.03333	0.0285156	806.886
1472	0.005	3.31	0.017	0.1	0.6	0.27	5.38	3.01	42.9	16.9	81.1	18.6	188	40.6	87.1	7.12	382	537	11844	2.34	1.88	6.74	1	0.5	400.792	3.432	52.16	345.2	100.583	1.24468	0.0186387	774.585
1473	0.014	4.73	0.017	0.17	0.72	0.39	6.33	3.89	66.4	33	196	54.9	634	138	102	4.57	300	1094	11855	0.57	0.32	3.78	1	0.5	1138.56	4.931	77.73	1055.9	214.135	1.78125	0.0152333	720.129
1474	0.064	5.02	0.04	0.51	0.8	0.4	6.91	3.36	47.3	20.8	108	27	298	67.7	70.8	34.6	412	683	12110	4.55	3.29	12	1	0.5	585.904	5.634	58.77	521.5	92.563	1.38298	0.0839806	835.193
1475	0.799	15.3	0.35	1.98	1.44	0.58	9.36	4.53	61.4	26.5	138	33.8	365	83.6	161	80.1	760	877	12199	8.68	6.35	11.9	1	0.5	742.639	18.429	77.31	646.9	35.1023	1.36693	0.105395	834.264
1476	0.015	1.2	0.026	0.2	0.48	0.41	5.29	3.29	55.5	24.3	121	29.3	323	69.1	180	7.34	694	824	10706	3.31	2.47	6.44	1	0.5	633.111	1.441	64.97	566.7	393.269	1.34008	0.0105764	770.082
1477	0.035	1.77	0.004	0.12	0.57	0.3	3.93	1.71	17.6	4.83	15.6	2.57	19.5	3.55	11.5	2.39	293	155	11341	0.41	0.19	5.2	1	0.5	72.089	1.929	24.11	46.05	23.8725	2.15789	0.008157	749.439
1478	0.041	2.18	0.004	0.16	0.51	0.3	4.32	1.81	19.4	5.19	16.3	2.5	19.4	3.17	11.6	3.91	270	166	11465	0.47	0.18	5.1	1	0.5	75.285	2.385	26.34	46.56	19.522	2.61111	0.0144815	747.605
1479	0.12	1.14	0.018	0.081	0.44	0.32	5.74	3.23	52.1	23.3	121	30.3	331	69.3	103	3.31	422	759	11930	1.42	1.32	4.38	1	0.5	638.089	1.359	61.83	574.9	423.032	1.07576	0.0078436	733.457
1480	0.014	0.84	0.011	0.18	0.53	0.42	6.53	4.08	72.8	34.5	193	52.1	575	123	76.9	3.08	296	1126	11624	1.5	1.29	4.67	1	0.5	1063.01	1.045	84.36	977.6	935.502	1.16279	0.0104054	739.369
1481	0.004	1.83	0.007	0.18	0.49	0.42	5.35	2.35	33.1	12.4	57.1	13.2	132	27.1	46.9	4.79	367	388	12014	1.01	0.61	4.92	1	0.5	285.531	2.021	41.71	241.8	119.644	1.65574	0.0130518	744.229
1482	0.011	0.6	0.014	0.13	0.55	0.53	6.29	3.79	66.4	30.7	166	44.9	508	111	85.1	2.08	298	997	12087	1.32	1.07	3.94	1	0.5	938.915	0.755	77.56	860.6	1139.87	1.23364	0.00697987	723.844
1483	0	1.07	0.012	0.23	0.73	0.38	9.13	5.21	94.3	45.5	254	65.7	693	145	80.6	4.72	286	1444	11060	1.52	1.27	6.71	1	0.5	1314.26	1.312	109.75	1203.2	917.073	1.19685	0.0165035	774.142
1484	0	0.59	0.007	0.084	0.53	0.31	6.96	4.49	75.9	33	176	44.9	500	107	75.4	1.9	261	1072	11912	1.34	0.97	4.53	1	0.5	949.771	0.681	88.19	860.9	1264.17	1.38144	0.00727969	736.553
1485	0.01	0.5	0.001	0.084	0.41	0.31	5.89	3.53	63.8	28.6	160	42	466	101	92.7	2.8	275	920	11283	1.49	1.26	2.88	1	0.5	872.135	0.595	73.94	797.6	1340.5	1.18254	0.0101818	696.434
1486	0.014	1.15	0.016	0.22	0.27	0.35	4.96	2.86	46.4	20.5	114	29.1	314	66.9	79.3	4.16	418	673	11157	1.31	1.16	5.58	1	0.5	600.74	1.4	54.84	544.5	388.929	1.12931	0.00995215	756.156
1487	0	1.43	0	0.16	0.59	0.28	5.72	2.87	45.6	19.9	104	26.2	279	57.8	39.4	4.3	266	629	11374	0.85	0.58	4.38	1	0.5	543.55	1.59	55.06	486.9	306.226	1.46552	0.0161654	733.457
1488	0.005	0.47	0.009	0.13	0.37	0.25	4.41	3.24	60.6	28	153	40.7	460	97.6	72.1	4.85	260	878	10934	1.73	1.5	3.99	1	0.5	848.784	0.614	68.87	779.3	1269.22	1.15333	0.0186538	724.979
1489	0.009	0.91	0.014	0.12	0.74	0.31	6.54	4.18	75.8	35.5	196	50.8	555	117	70.1	5.43	281	1153	11816	1.44	1.13	5.18	1	0.5	1042.92	1.053	87.57	954.3	906.268	1.27434	0.0193238	749.075
1490	0	1.35	0	0.11	0.32	0.24	3.79	2.13	31.6	12.9	66	16.7	181	37.5	29.6	5.34	282	406	11314	0.67	0.42	4.03	1	0.5	353.64	1.46	38.08	314.1	215.137	1.59524	0.0189362	725.879
1491	0.011	0.62	0.018	0.22	0.46	0.42	7.27	4.31	74.1	32.6	176	46.1	516	109	80.7	6.24	344	1069	11965	1.51	1.23	6.18	1	0.5	967.129	0.869	86.56	879.7	1012.31	1.22764	0.0181395	766.04
1492	0.002	0.68	0.012	0.12	0.32	0.26	4.56	3.03	53.3	26	152	40.4	464	98.1	78.1	2.92	282	841	11352	1.06	0.94	3.15	1	0.5	842.784	0.814	61.47	780.5	958.845	1.12766	0.0103546	704.116
1493	0.008	0.84	0.011	0.35	0.56	0.27	6.64	4.03	72.2	32.4	175	44.9	484	101	76.4	6.33	317	1066	11610	1.49	1.07	4.52	1	0.5	922.209	1.209	83.7	837.3	692.556	1.39252	0.0199685	736.349
1494	0.009	0.58	0.003	0.16	0.53	0.25	5.46	3.23	61.5	28.6	161	42.6	475	101	80.3	4.66	292	916	11722	0.99	0.99	4.93	1	0.5	879.922	0.752	70.97	808.2	1074.73	1	0.0159589	744.419
1495	0	1.84	0.008	0.15	0.35	0.29	3.35	1.46	16.8	4.43	15.9	2.89	22.2	3.9	11.1	3.66	257	150	11686	0.52	0.19	5.3	1	0.5	73.568	1.998	22.25	49.32	24.6847	2.73684	0.0142412	751.245
1496	0.004	0.83	0.005	0.17	0.62	0.29	5.69	3.58	64	30.6	177	45.3	506	108	61.7	3.44	260	982	12159	1	0.95	2.1	1	0.5	942.089	1.009	74.18	866.9	859.167	1.05263	0.0132308	670.292
1497	0.007	0.91	0.024	0.12	0.38	0.36	4.73	3.15	54.2	23.1	127	31.6	343	71.8	100	7.89	453	769	11327	1.38	1.21	4.35	1	0.5	660.381	1.061	62.82	596.5	562.205	1.1405	0.0174172	732.827
1498	0.011	1.3	0.013	0.14	0.54	0.26	4.58	2.54	41.2	17.9	99	25.2	282	61.8	67.4	5.39	381	578	11693	1	0.84	3.98	1	0.5	536.484	1.464	49.12	485.9	331.899	1.19048	0.014147	724.753
1499	0	1.42	0.016	0.09	0.5	0.28	4.94	1.88	24	7	26	4.5	38.6	6.7	8.77	0.83	201	238	13067	0.9	0.35	4.71	1	0.5	115.926	1.526	31.6	82.8	54.2595	2.57143	0.00412935	740.16
1500	0.014	1.62	0.011	0.11	0.75	0.51	8.47	4.98	82.7	36.5	190	47.9	539	107	197	7.07	613	1128	11822	5.2	4.51	9.86	1	0.5	1019.57	1.755	97.41	920.4	524.444	1.15299	0.0115334	813.784
1501	0.004	2.01	0.007	0.11	0.58	0.44	5.33	2.4	29	8.72	32.2	5.59	46.4	7.86	10.7	1.23	248	278	12352	1.03	0.59	7.24	1	0.5	140.651	2.131	37.75	100.77	47.2877	1.74576	0.00495968	781.741
1502	0.023	2.24	0.025	0.34	1.11	0.66	9.82	5.44	89.4	42.5	241	60.9	677	141	140	6.65	584	1396	11672	4.09	3.85	8.1	1	0.5	1271.46	2.628	106.43	1162.4	442.314	1.06234	0.011387	793.165
1503	0.002	1.66	0.001	0.063	0.56	0.37	5.05	2.31	26.4	7.81	26.7	4.48	34.6	5.83	8.65	0.71	201	257	12109	0.83	0.38	4.28	1	0.5	115.836	1.726	34.69	79.42	46.0139	2.18421	0.00353234	731.344
1504	0.003	2.51	0.015	0.24	0.8	0.54	9.85	5.44	84.6	37.5	208	54.5	612	130	145	7.21	598	1246	12038	3.24	2.42	7.69	1	0.5	1146	2.768	101.23	1042	376.445	1.33884	0.0120569	787.848
1505	0.011	1.5	0	0.19	0.84	0.36	8.32	5.21	88.8	42.1	246	64.3	730	155	214	5.51	690	1384	12140	3.65	3.85	4.19	1	0.5	1342.63	1.701	103.53	1237.4	727.454	0.948052	0.00798551	729.407
1506	0.033	2.21	0.019	0.25	0.59	0.53	5.21	2.62	30.8	9.65	36.1	6.42	53.4	8.71	12.5	1.27	271	320	11870	1.44	0.64	7.33	1	0.5	156.542	2.512	39.75	114.28	45.4936	2.25	0.00468635	782.987
1507	0.013	1.15	0.02	0.26	0.9	0.51	9.55	5.27	86.4	38.4	217	57	670	144	175	5.56	497	1224	11359	2.69	2.21	5.03	1	0.5	1230.47	1.443	102.63	1126.4	780.596	1.21719	0.0111871	746.304
1508	0.011	1.55	0.002	0.12	0.47	0.32	4.98	2.56	34	11.9	54	12	122	24.2	36.2	1.25	240	378	11715	1.46	0.69	5.59	1	0.5	268.113	1.683	42.33	224.1	133.155	2.11594	0.00520833	756.328
1509	0.002	1.79	0.002	0.13	0.5	0.4	5.06	2.39	28.1	8.68	31.6	5.33	42.5	7.05	9.47	1.06	228	280	11763	0.95	0.5	6.75	1	0.5	133.534	1.924	36.45	95.16	49.4595	1.9	0.00464912	774.733
1510	0.028	1.66	0.021	0.16	0.71	0.42	6.74	3.26	53.1	26	171	49.4	621	143	273	8.32	1039	863	12050	3.34	3.6	7.46	1	0.5	1076.5	1.869	64.23	1010.4	540.61	0.927778	0.0080077	784.764
1511	0	2.02	0.014	0.2	0.5	0.48	5.45	2.23	26	7.4	25.9	4.23	35.4	6	9.27	1.29	245	240	12265	0.98	0.44	7.24	1	0.5	115.824	2.234	34.66	78.93	35.3312	2.22727	0.00526531	781.741
1512	0.013	1.36	0.005	0.11	0.76	0.4	7.77	4.6	80.1	38.7	237	64.4	775	166	215	2.58	674	1258	11883	4.01	4.13	6.15	1	0.5	1376.22	1.488	93.63	1281.1	860.954	0.970944	0.00382789	765.565
1513	0.01	1.51	0	0.13	0.47	0.37	5.27	3.88	74	32.7	180	45	523	109	240	13.08	647	1080	11398	5.02	3.94	5.26	1	0.5	975.34	1.65	83.99	889.7	539.212	1.27411	0.0202164	750.526
1514	0.01	1.49	0.012	0.13	0.72	0.31	6.59	4.12	72.7	34.2	200	52.4	604	130	162	4.01	500	1117	11279	3.02	2.91	3.98	1	0.5	1106.68	1.642	84.44	1020.6	621.559	1.0378	0.00802	724.753
1515	0.004	1.49	0.015	0.07	0.46	0.3	5.17	2.47	33.7	13	61.4	14.4	155	31.3	53.3	1.96	315	399	10939	1.39	1.08	4.59	1	0.5	318.779	1.579	42.1	275.1	174.224	1.28704	0.00622222	737.768
1516	0	2.11	0.005	0.089	0.38	0.41	5.3	2.05	24	7.19	24.2	4.19	31.6	5.1	12.5	2.04	318	228	11475	0.98	0.39	8.59	1	0.5	106.624	2.204	32.14	72.28	32.7949	2.51282	0.00641509	799.242
1517	0	1.67	0.006	0.097	0.43	0.36	5.32	2.36	27.8	8.14	27.8	4.43	35.2	5.73	8.92	0.64	216	253	10813	0.99	0.36	6.44	1	0.5	119.343	1.773	36.27	81.3	45.8545	2.75	0.00296296	770.082
1518	0.006	0.74	0.013	0.18	0.67	0.55	8.73	4.89	89.8	39.5	217	55.2	611	126	82.4	1.84	252	1286	10984	1.55	1.61	4.62	1	0.5	1154.28	0.939	104.64	1048.7	1116.83	0.962733	0.00730159	738.371
1519	0.031	1.39	0.008	0.18	0.8	0.43	6.97	3.8	66.4	29.2	172	44.4	493	107	115	5.91	530	988	10350	5.1	5.54	6.65	1	0.5	925.609	1.609	78.4	845.6	525.544	0.920578	0.0111509	773.252
1520	0.005	1.78	0.014	0.16	0.58	0.42	4.36	1.98	24.4	7.47	28.4	4.95	40.2	7.36	6.43	0.74	152	251	10433	0.89	0.39	6.48	1	0.5	122.079	1.959	31.74	88.38	45.1149	2.28205	0.00486842	770.692
1521	0.01	1.62	0.004	0.17	0.6	0.34	6.53	3.56	60.1	27	156	40	452	98.5	89.8	4.12	410	899	10354	2.68	2.62	4.33	1	0.5	846.434	1.804	71.13	773.5	428.769	1.0229	0.0100488	732.405
1522	0.063	1.57	0.023	0.18	0.69	0.33	4.21	1.95	23	6.97	24.7	4.34	36.5	6.15	9.47	1.3	220	215	9436	0.79	0.4	45.4	1	0.5	110.676	1.836	30.18	78.66	42.8431	1.975	0.00590909	1005.86
1523	0	1.69	0.001	0.08	0.36	0.36	3.84	1.99	22.5	6.51	23.1	3.71	28.7	4.81	7.71	0.62	184	216	10322	0.67	0.25	3.66	1	0.5	97.651	1.771	29.05	66.83	37.7357	2.68	0.00336957	717.258
1524	0	1.71	0.003	0.1	0.45	0.24	3.5	1.62	17.4	5.25	18.1	3.13	23.6	3.96	10.2	1.61	264	170	10870	0.61	0.24	5.89	1	0.5	79.063	1.813	23.21	54.04	29.8069	2.54167	0.00609848	761.365
1525	0.01	33.1	0.06	0.91	1.92	0.39	12.8	5.63	78.3	32.7	152.5	35.9	379	64.7	62.1	136.94	172.56	991	8914	8.4	2.1	2.7	1	0.5	797.92	34.08	99.04	664.8	19.507	4	0.793579	690.975
1526	0.01	14.4	0.01	0.31	1.39	0.47	5.9	2.04	25.5	10.2	45.5	11.2	115	20.1	53.7	21.1	31.47	301	6583	1.3	0.3	4.1	1	0.5	252.03	14.73	35.3	202	13.7135	4.33333	0.67048	727.437
1527	0.01	43.2	0.03	0.67	2.07	0.4	12.4	5.43	76.9	33.9	179.8	44.6	475	86.9	47.4	135.73	166.95	1109	8771	11.6	2.6	3.1	1	0.5	961.31	43.91	97.2	820.2	18.6791	4.46154	0.812998	702.736
1528	0	0	0	0.08	0.06	0.01	0	0.01	0.1	0.3	7.7	5.2	81	9.4	57.7	0.0044	426.57	70	13053	134.2	6.6	34.9	1	0.5	103.86	0.08	0.18	103.6	1295	20.3333	1.03148e-05	968.076
1529	0.02	48.2	0.11	1.96	3.45	1.22	18.8	7.34	90.2	36.5	173.4	40	426	75.5	45.2	75.83	76.69	1081	6854	4.4	1	3.4	1	0.5	922.7	50.29	121.01	751.4	14.9413	4.4	0.988786	710.761
1530	4.15	0.1	0.93	3.51	0.88	0.37	0.5	0.12	1	0.6	7.1	3.8	50	6.5	39.9	0.02	1111.4	86	11709	46.6	2.6	38.26	1	0.5	79.56	8.69	2.87	68	7.82509	17.9231	1.79953e-05	981.022
1531	0.01	38.4	0.07	0.87	2.65	1.2	15.8	6.12	74.8	31	145.8	34	366	64.2	52.3	56.85	59.17	944	7032	3.5	0.8	5.3	1	0.5	780.92	39.35	100.57	641	16.2897	4.375	0.960791	751.245
1532	0.02	48.2	0.1	1.62	3.5	0.92	14.5	5.31	69.4	27.8	133	29.8	318	54.8	46.3	212.8	146.59	838	7658	6.5	1	5.9	1	0.5	706.97	49.94	93.63	563.4	11.2815	6.5	1.45167	761.529
1533	0	39.5	0.07	2.05	3.11	0.89	16.2	5.64	71	28.9	126.7	28.6	292	49.1	31.4	95.71	121.84	819	7448	4.7	0.9	3.7	1	0.5	663.76	41.62	96.84	525.3	12.6213	5.22222	0.785538	718.223
1534	0	0	0.01	0.05	0	0.01	0.1	0.05	1.1	2.4	44.3	22.6	315	49.4	45.8	0.0085	1514.34	326	11453	48.2	3.1	28.9	1	0.5	435.02	0.06	1.26	433.7	7228.33	15.5484	5.61301e-06	942.325
1535	0.01	32.8	0.07	0.63	2.04	0.53	13.6	5.18	70.1	28	133.4	31.1	320	56.7	32.5	45.82	54.1	831	8001	3.8	1.1	1.8	1	0.5	694.16	33.51	91.45	569.2	16.986	3.45455	0.84695	658.039
1536	0	0	0.01	0	0.04	0.01	0.1	0.01	0.1	0.1	0.7	0.6	13	2	31.1	0.01	68.49	0	18365	282.3	23.2	43.93	1	0.5	16.67	0.01	0.26	16.4	1640	12.1681	0.000146007	1001
1537	0.01	0	0	0.05	0.05	0.01	0.1	0.01	0.6	0.8	23.8	19.2	340	47.3	25.2	0.0075	122.63	146	13146	24.8	2.1	9.4	1	0.5	431.93	0.06	0.77	431.1	7185	11.8095	6.11596e-05	808.701
1538	0.35	47.7	0.41	4.18	2.94	0.47	13.9	6.14	78.1	32.8	160	38.2	400	68.5	38.5	186.97	187.14	1012	9455	8.7	2.1	6.1	1	0.5	853.69	52.64	101.55	699.5	13.2884	4.14286	0.999092	764.769
1539	0.01	29.8	0.08	1.28	2.89	0.55	16.5	6.49	79.6	30.8	139.6	30.4	310	51.7	40.3	86.94	86.53	873	7984	3.4	0.8	4.1	1	0.5	699.7	31.17	106.03	562.5	18.0462	4.25	1.00474	727.437
1540	0.05	102.3	0.13	2.77	4.24	1.36	19.9	7.11	87.3	34.9	168.3	40.5	435	73.6	33.8	407.96	257.68	1080	7119	12.7	1.9	23.8	1	0.5	977.46	105.25	119.91	752.3	7.14774	6.68421	1.5832	916.915
1541	0.01	32.5	0.04	1.16	2.24	1	12.1	4.59	58.8	23.9	118.1	28.8	305	55	38.6	62.76	55.44	723	7550	2.3	0.6	3.5	1	0.5	643.24	33.71	78.73	530.8	15.7461	3.83333	1.13203	713.306
1542	0.01	49.9	0.06	1.05	2.23	0.67	15.2	5.72	76	30.9	149.4	36.6	391	67.4	42.6	133.71	136.18	963	9383	6.8	1.6	2.8	1	0.5	826.14	51.02	99.82	675.3	13.236	4.25	0.981862	694.044
1543	0.07	54.2	0.09	1.3	2.7	0.66	17.2	7.09	93.1	39.2	190.9	46.2	478	81.1	44.3	178.64	177.38	1193	9451	9	2.3	3	1	0.5	1011.81	55.66	120.75	835.4	15.009	3.91304	1.0071	699.919
1544	0.01	0	0.01	0	0.06	0.05	0.4	0.25	4.8	7.5	137.1	68.4	929	123.5	46.4	0.01	535.87	1130	12821	271.1	8.1	57.3	1	0.5	1271.08	0.02	5.56	1265.5	63275	33.4691	1.86612e-05	1041.26
1545	0.02	0	0.01	0.06	0.04	0.03	0.1	0.08	1	0.8	12.7	7.7	123	18	48.7	0.02	741.03	86	13294	122.9	5.7	40.7	1	0.5	163.54	0.09	1.25	162.2	1802.22	21.5614	2.69895e-05	989.883
1546	0	34.7	0.05	0.86	2.68	0.55	13.2	4.73	64.2	26	121.3	28.8	300	51	45	73.26	80.45	761	8357	4.1	1.1	2.6	1	0.5	648.07	35.61	85.36	527.1	14.802	3.72727	0.910628	687.812
1547	0.03	34.1	0.25	4.56	6.82	2.35	31.2	10.03	112.9	40.1	170.1	36.3	360	58.1	44	83.58	64.59	1085	7590	2.7	0.8	4.3	1	0.5	866.84	38.94	163.3	664.6	17.0673	3.375	1.29401	731.77
1548	0.43	41.1	0.33	3.04	2.73	0.35	12.2	5.24	74.8	31.7	156.5	38.8	399	66.3	53.4	133.53	171.71	976	10003	8.3	2.4	3.4	1	0.5	832.52	44.9	95.32	692.3	15.4187	3.45833	0.777648	710.761
1549	0.84	0.5	0.42	2.73	1.69	0.55	2.9	0.69	9.2	7.5	96.4	41.2	523	72.3	49.5	0.19	2494.29	750	9236	61.5	3.6	32.3	1	0.5	759.92	4.49	15.03	740.4	164.9	17.0833	7.6174e-05	957.377
1550	0.01	21.7	0.03	0.58	1.63	0.81	9.1	3.21	39.9	15.8	78.8	17.6	200	35.9	68.8	47.28	79.47	501	7977	1.7	0.3	2.6	1	0.5	425.07	22.32	54.65	348.1	15.5959	5.66667	0.594941	687.812
1551	0.01	50.9	0.05	1.05	2.73	0.61	14.2	6.18	82.3	35.1	170.4	40.2	414	71.2	61.7	111.05	116.12	1068	9624	6.5	1.4	3.1	1	0.5	888.93	52.01	106.02	730.9	14.0531	4.64286	0.956338	702.736
1552	1.04	119.4	0.83	10.45	16.12	4.16	59.8	18.01	198.6	71	316.6	71.4	719	127.3	37.4	590.24	266.95	2053	6254	14.4	1.4	3.4	1	0.5	1733.71	131.72	296.69	1305.3	9.90966	10.2857	2.21105	710.761
1553	0.01	0.3	0.01	0	0.02	0.05	0.4	0.33	5.3	3.5	25	8.6	130	33.6	56.1	0.59	72.66	133	9239	0.7	0.1	0.9	1	0.5	207.12	0.32	6.1	200.7	627.188	7	0.00812001	606.659
1554	0.01	43.1	0.02	0.9	2.24	0.46	11.6	5.24	70.2	31	150.4	36	372	63.3	51.9	110.65	132.66	944	9717	6.2	1.5	2.2	1	0.5	786.47	44.03	89.74	652.7	14.824	4.13333	0.834087	674.054
1555	0.01	2.1	0.01	0.09	0.15	0.13	1.4	0.61	9.3	4.8	26.8	7.8	95	20.4	52.2	4.85	278.57	179	9805	1	0.2	1.2	1	0.5	168.6	2.21	11.59	154.8	70.0452	5	0.0174103	627.28
1556	0.02	80.5	0.12	2.12	5.54	1.82	31.2	10.21	127.3	49.1	228.2	50.1	486	85.9	33.8	146.41	100.32	1437	7770	5.4	1	2.3	1	0.5	1158.13	82.76	176.07	899.3	10.8664	5.4	1.45943	677.676
1557	0.01	71.1	0.06	1.61	3.62	1.34	21.5	8.33	112.2	45.1	214.1	47.3	479	83.4	38.6	140.24	159.9	1369	9172	6.3	1.2	5.5	1	0.5	1088.67	72.78	146.99	868.9	11.9387	5.25	0.877048	754.774
1558	0.06	0.2	0.03	0.36	0.93	1.07	13.4	10.45	195.9	92.3	457.6	100.9	954	149.4	26.8	0.26	787.61	4981	25189	1.94	123.9	126.7	1	0.5	1976.6	0.65	221.75	1754.2	2698.77	0.0156578	0.000330113	1178.23
1559	0.03	118.9	0.43	6.94	10.67	4.76	50.7	18.44	223.1	84.7	376.8	82.8	810	140.2	36.5	163.33	91.05	2463	6746	5.8	0.7	5.7	1	0.5	1928.47	126.3	307.67	1494.5	11.8329	8.28571	1.79385	758.2
1560	0.14	48.4	0.48	6.92	10.96	4.93	44.5	14.38	168.6	61.5	263	56.2	552	94.4	28.6	81.52	40.93	1783	6218	1.7	0.3	11.4	1	0.5	1326.41	55.94	243.37	1027.1	18.3607	5.66667	1.99169	829.521
1561	0.01	14	0.02	0.19	0.65	0.26	4.1	1.83	23.6	10.9	56.5	15.8	200	41.1	25	27.02	221	350	9892	2.7	0.5	1.6	1	0.5	368.96	14.22	30.44	324.3	22.8059	5.4	0.122262	648.89
1562	0.02	0.2	0.02	0.08	0.45	0.33	3.9	2.28	41.5	19.4	98.9	25	261	40.4	29.6	0.22	711.02	1171	33067	1.94	255.8	127.2	1	0.5	493.48	0.32	48.46	444.7	1389.69	0.00758405	0.000309415	1178.98
1563	0.22	53.4	0.21	3.14	4.63	1.93	20	7.73	90.5	35	160.9	36.8	376	65.8	37.1	96.77	62.66	1057	6805	2.3	0.6	6	1	0.5	856.26	56.97	124.79	674.5	11.8396	3.83333	1.54437	763.16
1564	0.01	0.9	0.01	0.05	0.06	0.09	0.6	0.29	5.2	2.7	18.2	6	91	23.5	24.3	1.95	167.72	106	9717	0.7	0.1	0.8	1	0.5	148.61	0.97	6.24	141.4	145.773	7	0.0116265	598.487
1565	0.01	45	0.06	1.21	2.84	1.02	15	6.26	82	34.5	169.5	40.4	421	73.7	34.6	80.86	107.37	1031	8883	4.8	1.2	4.5	1	0.5	892.5	46.28	107.12	739.1	15.9702	4	0.753097	735.941
1566	0.02	67.6	0.12	1.76	3.97	1.51	19.9	7.14	92.1	36.4	165.3	37.7	378	65.5	26.5	166.08	96.66	1053	8393	4.3	0.9	3.8	1	0.5	877.02	69.5	124.62	682.9	9.8259	4.77778	1.71819	720.6
1567	0.06	1.1	0.21	0.09	0.13	0.11	0.6	0.33	5.7	3	19.5	6.4	91	20.7	24.7	2.03	138.53	124	9918	0.7	0.1	0.8	1	0.5	148.93	1.46	6.87	140.6	96.3014	7	0.0146539	598.487
1568	0.02	79.5	0.12	2.41	5.17	2.13	27.7	10.59	134.4	54.5	260.4	60.5	614	107.4	43.8	117.86	88.22	1645	7382	5.6	1	5.8	1	0.5	1358.84	82.05	179.99	1096.8	13.3675	5.6	1.33598	759.876
1569	0.84	0.3	0.39	2.44	1.49	0.68	5.5	3.36	48.3	23.2	110.3	26.1	253	36.4	34.1	0.19	797.49	1253	26267	585.4	112.4	54.7	1	0.5	512.3	3.97	59.33	449	113.098	5.20819	0.000238248	1034.05
1570	0.01	59.4	0.11	1.61	3.98	1.47	21.8	8.41	111	45.4	210.6	51	519	89.7	28.1	101.09	87.73	1377	7499	6	1	6.4	1	0.5	1123.49	61.13	146.66	915.7	14.9796	6	1.15229	769.469
1571	0.24	0.2	0.13	1.01	0.49	0.29	0.6	0.28	2.6	1.3	15.8	8	116	17	25.5	0.34	1037.97	147	22037	72.1	10.6	23.2	1	0.5	163.94	1.58	4.26	158.1	100.063	6.80189	0.000327562	913.652
1572	0.09	34.7	0.4	6.61	9.38	3.87	35.9	11.65	131.9	47.2	202.6	44.6	442	75	33.2	70.33	46.4	1350	6889	1.2	0.4	3.3	1	0.5	1045.9	41.8	192.7	811.4	19.4115	3	1.51573	708.153
1573	0.47	30	0.25	1.86	3.99	0.64	18.8	6.88	81.3	30.9	143.3	30.9	296	53.1	98.2	61.31	62.59	920	7855	3.7	0.8	17.2	1	0.5	698.39	32.58	111.61	554.2	17.0104	4.625	0.979549	876.704
1574	0.13	57.6	0.34	2.98	3.85	1.68	16.4	5.52	63.1	23.7	106	23.1	242	43	103.7	66.53	38.29	703	5987	1.9	0.3	11.6	1	0.5	589.4	61.05	90.55	437.8	7.17117	6.33333	1.73753	831.438
1575	0.01	0.1	0.02	0.04	0.07	0.01	0.1	0.01	1	4.7	126	67.1	940	154.4	84.9	0.08	1044.15	615	11180	106.2	5.1	40.1	1	0.5	1293.56	0.17	1.19	1292.2	7601.18	20.8235	7.66173e-05	987.743
1576	0.01	0.1	0	0.07	0.14	0.03	0.1	0.01	0.7	3.3	77.2	39.4	563	91.8	68.8	0.05	985.13	432	13222	81.6	4.8	42.6	1	0.5	775.86	0.18	0.98	774.7	4303.89	17	5.07547e-05	996.503
1577	0.01	75.4	0.1	2.08	3.98	1.44	19.6	8.23	96.5	39.3	195.1	43.1	448	80.6	66.7	66.27	56.36	1229	6848	3.9	0.7	4.5	1	0.5	1013.44	77.59	129.75	806.1	10.3892	5.57143	1.17583	735.941
1578	0.01	48.2	0.11	2.01	2.84	1.13	18	6.01	77.7	29.9	149.5	32.3	340	61.9	70.6	48.56	42.11	914	6994	2.7	0.6	6.3	1	0.5	769.61	50.33	105.68	613.6	12.1915	4.5	1.15317	767.923
1579	0.02	45.3	0.03	0.23	0.87	0.06	6.1	3.77	55.9	29.5	193	56.4	701	142.7	59.4	320.47	652.32	1187	13401	28.2	12.4	4.9	1	0.5	1234.88	45.58	66.7	1122.6	24.6292	2.27419	0.491277	743.848
1580	0.1	51.8	0.45	6.17	12.08	0.06	45.1	13.66	144.7	48.8	199.5	38.9	377	65.7	61.6	311.25	196.9	1330	5035	3.5	0.6	8.3	1	0.5	1004.02	58.52	215.6	729.9	12.4727	5.83333	1.58075	795.68
1581	0.01	70.2	0.03	1.04	1.45	0.25	9.3	4.12	57.7	27.5	153.9	39.8	453	88.4	65.2	139.63	128.76	998	8262	7.7	1.3	1.9	1	0.5	906.7	71.28	72.82	762.6	10.6987	5.92308	1.08442	662.301
1582	1.84	32.5	1.08	5.45	4.16	0.82	10.2	4.36	54.3	21.8	115.4	29.6	344	73.7	28	111.59	1535.97	787	13580	18	6.4	2.1	1	0.5	699.21	40.87	73.84	584.5	14.3014	2.8125	0.0726512	670.292
1583	0.02	17.9	0.19	2.2	4.08	1.35	15.5	4.55	52.3	19.9	89.1	19.1	199	36.6	48.2	23.94	16.86	595	5745	0.6	0.1	5.2	1	0.5	461.79	20.31	77.78	363.7	17.9074	6	1.41993	749.439
1584	0.06	38.5	0.05	1.65	2.79	0.77	12.4	4.89	63.3	26.7	126.3	29.3	307	58.2	44.3	60.11	65.86	792	7527	3.8	0.9	3.6	1	0.5	671.91	40.26	84.15	547.5	13.5991	4.22222	0.912694	715.793
1585	0	0	0	0	0.03	0	0.1	0.34	31.5	38.2	313.1	91.2	981	170.6	38.1	0.0045	2822.48	2186	8626	30.4	3.7	4.3	1	0.5	1626.07	0	31.97	1594.1	0	8.21622	1.59434e-06	731.77
1586	0.01	29.1	0.04	1.8	2.66	1.34	13.9	5.11	62.8	26.7	132.7	31.2	333	62.3	51.6	42.83	40.12	829	6815	2.1	0.4	4.2	1	0.5	702.66	30.95	85.81	585.9	18.9305	5.25	1.06755	729.624
1587	0.02	37.9	0.03	0.93	2.25	1.03	11.1	4.41	55.9	22	102.6	25	265	47.1	46.1	67.8	59.59	676	8111	2.4	0.7	4.2	1	0.5	575.27	38.88	74.69	461.7	11.875	3.42857	1.13777	729.624
1588	0.01	117.9	0.14	2.63	4.83	2	32	11.83	151.5	62.4	289.6	65	645	110.9	41.9	149.99	99.12	1832	7261	7	1.1	4.1	1	0.5	1495.74	120.68	202.16	1172.9	9.71909	6.36364	1.51322	727.437
1589	0.01	40.6	0.15	2.29	4.96	1.27	23.8	8.72	112.1	43.4	198.2	43.6	437	74.8	33.1	82.95	68.95	1267	8168	2.7	0.6	3	1	0.5	990.9	43.05	150.85	797	18.5134	4.5	1.20305	699.919
1590	0.01	63.7	0.12	2.52	4.97	1.96	23.1	9.22	123.2	50.8	241	55.8	575	103	42.2	123.21	99.12	1540	6956	6.2	1	6.5	1	0.5	1254.4	66.35	162.45	1025.6	15.4574	6.2	1.24304	770.996
1591	0.01	0	0	0.06	0.14	0.11	1.3	0.82	14.8	7.9	50.9	17.4	249	46	50.3	0.03	258.08	430	22280	447.2	20.7	43	1	0.5	388.44	0.07	17.17	371.2	5302.86	21.6039	0.000116243	997.868
1592	0.05	58.2	0.55	8.23	10.95	4.12	42	13.1	146.1	51.4	216.3	46.1	449	74.8	38.1	78.8	47.32	1453	6254	1.5	0.4	1.6	1	0.5	1120.9	67.03	216.27	837.6	12.4959	3.75	1.66526	648.89
1593	0.07	0.4	0.04	0.09	0.2	0.02	0.3	0.08	2.4	7.7	206.4	117.9	1689	274.7	41.6	0.51	911.98	950	10581	55.9	3.6	36.9	1	0.5	2299.3	0.6	3	2295.7	3826.17	15.5278	0.000559223	975.893
1594	0.02	40	0.03	0.76	2.23	0.43	14.9	5.85	78.1	33	161.8	39.6	412	72	40.9	104.78	129.74	1000	9438	5	1.1	3.3	1	0.5	860.72	40.81	101.51	718.4	17.6035	4.54545	0.807615	708.153
1595	0	0	0.01	0	0.09	0.04	0.1	0.05	2.9	7.6	187.2	124.2	2377	375.6	148.2	0.02	57.85	788	6696	13.4	0.5	20.4	1	0.5	3074.79	0.01	3.18	3071.6	307160	26.8	0.000345722	897.485
1596	0.01	77.9	0.16	3.52	6.08	3.23	26.9	10.65	136.2	54.1	251.2	54.6	543	100.1	106.6	105.66	64.01	1605	5679	3.6	0.6	7.9	1	0.5	1267.65	81.59	183.06	1003	12.2932	6	1.65068	790.599
1597	0.01	41.1	0.08	2.3	2.2	0.97	11	3.8	46.3	18.6	83.7	19.5	204	34.8	111.1	46.87	39.2	555	6164	1.7	0.4	6.5	1	0.5	468.36	43.49	64.27	360.6	8.29156	4.25	1.19566	770.996
1598	0.01	70.3	0.11	0.96	4.37	0.83	16.6	7.59	97.7	40.6	189.9	45.3	472	83.6	88.6	149.63	120.58	1265	6949	7.3	1.3	3	1	0.5	1029.87	71.38	127.09	831.4	11.6475	5.61538	1.24092	699.919
1599	0.01	0	0.02	0.09	0.05	0.03	0.1	0.08	5.1	14.4	358.9	240.7	4197	41.89	75.3	0.0069	91.39	1501	6460	17.2	1	20	1	0.5	4858.37	0.12	5.36	4852.89	40440.8	17.2	7.55006e-05	895.034
1600	0.01	0	0.01	0.1	0.06	0.03	0.1	0.04	2.8	10.2	431.7	352.5	6531	41.89	53.4	0.01	62.4	1190	6800	7.4	0.7	6.5	1	0.5	7370.44	0.12	3.03	7367.29	61394.1	10.5714	0.000160256	770.996
1601	0.09	29.1	0.15	2.81	5.21	0.72	26.1	9	106.9	40.2	177.8	38	377	68	62.9	97.59	144.27	1177	7162	4.8	0.8	6.3	1	0.5	881.08	32.15	147.93	701	21.804	6	0.67644	767.923
1602	0.05	13	0.07	0.55	0.86	0.42	3.9	1.64	19.8	8.3	42.2	10.3	122	24.7	64.4	37.23	595.32	296	14676	8	3.7	1.9	1	0.5	247.79	13.67	26.62	207.5	15.1792	2.16216	0.0625378	662.301
1603	0.06	46.3	0.54	6.84	9.66	3.99	34.1	10.04	107.5	39.4	165.7	35	343	62.8	63.9	48.29	25.16	1102	5293	1	0.2	8.6	1	0.5	864.93	53.74	165.29	645.9	12.019	5	1.91932	799.363
1604	0.03	92.5	0.23	3.19	6.5	2.67	30.4	11	137	53.5	249	52.5	525	93.8	36.6	97.51	65.19	1608	6597	4.5	0.8	5.3	1	0.5	1257.32	95.95	187.57	973.8	10.149	5.625	1.49578	751.245
1605	0.01	0	0.01	0.08	0.08	0.02	0.2	0.1	5.2	13.3	339.2	225.7	3835	41.89	61.9	0.01	124.12	1358	7433	22.7	1.2	27.8	1	0.5	4460.79	0.1	5.6	4455.09	44550.9	18.9167	8.05672e-05	937.16
1606	0	0	0.01	0.04	0.04	0.01	0.1	0.09	6.5	19.1	470.6	316	5415	41.89	45.1	0.0085	113.43	2008	7101	21.6	1.1	18.7	1	0.5	6269.38	0.05	6.74	6262.59	125252	19.6364	7.49361e-05	886.795
1607	0.02	9.1	0.01	0	0.18	0.11	1.7	0.83	13.6	6.9	45	14.5	207	53.9	47.4	34.8	1077.92	262	10478	6.2	1.9	0.9	1	0.5	352.85	9.13	16.42	327.3	35.8488	3.26316	0.0322844	606.659
1608	0.05	41.4	0.33	4.69	7.76	2.77	32.9	9.99	114.1	42.3	182	38.4	388	69	57.4	56.6	47.23	1200	6712	1.3	0.4	6.6	1	0.5	933.69	46.47	167.52	719.7	15.4874	3.25	1.19839	772.505
1609	0.01	0	0.01	0.06	0.07	0.02	0.1	0.04	2.8	12.9	436.3	315.3	5458	41.89	58	0.0098	78.59	1437	7711	12.5	1.1	9.3	1	0.5	6267.5	0.08	3.03	6264.39	78304.9	11.3636	0.000124698	807.569
1610	0.01	53.2	0.17	2.76	5.7	2.5	28.3	9.75	116.2	43.4	202.1	44.1	432	78.1	64.9	119.61	51.41	1288	6426	2.4	0.5	7.8	1	0.5	1018.29	56.14	162.45	799.7	14.2447	4.8	2.32659	789.296
1611	0.44	147.9	1.09	15.31	27.88	7.16	117.7	36.34	390.9	133.9	534.3	105.7	924	153.9	88.9	323.65	126.97	3734	6958	7.6	1.2	6.9	1	0.5	2596.52	164.74	579.98	1851.8	11.2407	6.33333	2.54903	776.921
1612	0.01	61.6	0.1	1.75	2.84	0.79	14.7	4.81	65.4	27.8	140	33.3	365	65.9	55.2	67.89	69.16	888	7385	5.2	0.9	3.9	1	0.5	784	63.46	88.54	632	9.95903	5.77778	0.981637	722.927
1613	2.67	46	1.39	10.6	8.14	0.63	33.9	12.56	152.9	59.1	268.3	56.9	553	96.5	46.9	82.2	101.81	1735	7856	7.8	1.5	3.4	1	0.5	1302.59	60.66	208.13	1033.8	17.0425	5.2	0.807386	710.761
1614	0.00873427	1.17563	0.0763663	1.3988	2.84431	0.116643	8.34404	1.43677	9.10059	1.52972	3.68661	0.432401	2.90322	0.409313	254.226	18.636	251.026	53.1997	12952.1	0.240054	0.0528677	63.2033	1	1	33.4631	2.65953	21.8423	8.96127	3.3695	4.54066	0.0742392	954.39
1615	0.00211842	0.706057	0.0211679	0.678012	3.15444	0.178568	16.7932	3.42145	15.7926	1.82182	3.16755	0.31552	1.99084	0.37036	181.293	25.942	587.23	64.0656	13973.9	0.80082	0.828554	49.8032	1	1	48.4136	1.40735	39.3402	7.66609	5.44716	0.966527	0.044177	922.741
1616	0.0171754	0.815343	0.0565757	0.671813	2.36151	0.154154	12.5534	3.04894	22.7033	4.43043	13.8003	2.50662	27.9181	4.72966	233.077	40.9605	728.824	164.876	12765.5	0.626997	0.614736	46.5963	1	1	95.7674	1.56091	40.8213	53.3852	34.2014	1.01995	0.0562008	914.191
1617	0.00215185	0.513135	0.0314226	0.618615	2.15091	0.211002	14.9244	3.59975	19.9509	2.40898	4.71319	0.477655	3.6832	0.419522	194.507	17.3329	664.336	88.341	13908.7	0.559894	0.641494	50.5065	1	1	53.7048	1.16532	40.8369	11.7026	10.0423	0.872796	0.0260906	924.559
1618	0.00889369	0.585632	0.0250294	0.455734	2.34319	0.156326	15.8139	4.08504	21.0097	2.51331	4.7952	0.570891	4.83645	0.724429	233.019	22.1228	805.883	89.0079	14142.1	0.428229	0.648467	51.6433	1	1	57.9238	1.07529	43.4082	13.4403	12.4992	0.660372	0.0274517	927.454
1619	0.361123	1.41683	0.118391	1.02147	2.14943	0.132702	16.2746	4.25936	25.1878	3.12935	6.78372	1.0572	9.87732	1.62162	267.179	27.2838	919.944	111.626	13413.9	0.489589	0.66653	49.4556	1	1	73.391	2.91782	48.004	22.4692	7.7007	0.734535	0.0296581	921.836
1620	0.00428673	1.95832	0.0724618	1.14406	2.61962	0.121602	6.82403	0.897869	3.85773	0.491242	1.04808	0.105649	0.888854	0.0817311	284.509	21.8813	638.147	19.5633	13258	0.259071	0.059618	50.2721	1	1	20.1155	3.17913	14.3209	2.61556	0.822728	4.34552	0.0342888	923.955
1621	0.0104694	0.576911	0.0509554	1.11261	4.76294	0.49776	34.5387	9.84623	62.1656	8.48634	17.5385	1.90102	13.5585	1.62599	288.726	25.2792	1023.48	298.577	13980.5	0.679507	0.655748	51.9624	1	1	156.672	1.75095	111.811	43.1103	24.6212	1.03623	0.0246993	928.258
1622	0.0176207	1.60321	0.0507654	0.934421	2.62273	0.115057	8.24059	0.999006	4.48325	0.611279	1.17954	0.149419	1.17163	0.142148	156.595	78.1796	282.404	23.5242	12523.3	0.256576	0.0708495	51.987	1	1	22.3207	2.60602	16.4606	3.25402	1.24865	3.62142	0.276836	928.32
1623	0.00887052	0.509125	0.0408875	0.576594	2.29716	0.213785	16.2771	4.07655	23.5294	2.83394	5.37164	0.56997	3.71194	0.501569	184.359	17.7219	627.275	102.697	13980.8	0.547075	0.601097	53.166	1	1	60.5185	1.13548	46.3939	12.9891	11.4393	0.910127	0.0282522	931.256
1624	0.0197601	0.5432	0.0365647	0.544087	2.65432	0.18864	17.7526	4.77959	27.828	3.52997	6.40033	0.672108	4.98532	0.739045	236.209	23.9628	826.122	127.476	13961.2	0.355674	0.456005	45.298	1	1	70.6735	1.14361	53.2031	16.3268	14.2765	0.779978	0.0290063	910.597
1625	0.0886589	1.37081	0.139512	1.46942	2.52597	0.18219	9.51846	1.65236	8.88028	1.28813	2.96479	0.428807	3.62571	0.46995	253.898	145.69	538.515	48.7576	13741.9	0.765499	0.630336	57.1484	1	1	34.6051	3.0684	22.7593	8.77739	2.86057	1.21443	0.27054	940.812
1626	0.0087194	1.76081	0.0602701	0.914574	2.81227	0.159981	6.64194	0.790777	3.52402	0.517734	1.19619	0.109459	0.834971	0.0946749	231.734	113.855	455.807	19.6838	12719.5	0.175655	0.0523884	53.6894	1	1	19.4264	2.74437	13.929	2.75303	1.00316	3.35294	0.249787	932.543
1627	0.00875587	1.87499	0.0537945	0.838497	2.45186	0.117122	5.91738	0.816558	4.02736	0.584039	1.29288	0.134518	1.00015	0.137454	318.683	123.452	754.336	22.6238	13029.3	0.228696	0.0402478	53.7429	1	1	19.2554	2.77604	13.3303	3.14905	1.13437	5.68221	0.163657	932.674
1628	0.38345	4.57103	0.125945	0.979586	2.18672	0.251913	14.0293	4.18408	38.7081	11.3612	57.5517	14.1215	194.688	38.9113	323.207	73.5117	921.5	421.283	12857.9	1.54338	1.13746	50.3456	1	1	382.054	6.06001	59.36	316.634	52.2497	1.35687	0.079774	924.145
1629	0.101092	3.49576	0.0677108	0.578788	1.99749	0.216943	13.9609	4.37585	39.3102	8.70907	35.8594	7.76206	92.4406	16.2949	288.723	38.2879	888.575	341.209	13647.7	1.1361	1.00403	57.8034	1	1	225.171	4.24335	59.8614	161.066	37.9573	1.13153	0.0430891	942.333
1630	0.00430152	0.533617	0.0379795	0.83347	3.41185	0.292705	25.3253	7.06267	46.8342	6.38299	13.1914	1.45838	11.0752	1.23121	266.835	19.65	965.46	232.231	14013.3	0.639373	0.692772	55.5363	1	1	117.675	1.40937	82.9268	33.3392	23.6554	0.922921	0.020353	937.008
1631	0.0368999	0.988537	0.0531167	1.05139	2.98518	0.193721	13.9893	2.27026	10.1431	1.19255	2.91923	0.438571	4.12	0.706609	156.898	46.3903	405.351	47.3261	13418.7	1.08027	0.732337	56.1383	1	1	41.0884	2.12994	29.5815	9.37696	4.40245	1.47509	0.114445	938.439
1632	0.0286327	0.624328	0.0329712	0.62759	2.74641	0.178531	24.4687	9.00837	67.7244	9.88286	23.1046	2.77308	20.6848	2.61889	558.384	28.081	2399.57	380.953	13420.2	0.601327	0.95081	46.2452	1	1	164.504	1.31352	104.126	59.0642	44.9663	0.632437	0.0117025	913.226
1633	0.163365	2.3754	0.0766601	0.645384	2.13715	0.222807	14.4098	4.82255	44.4948	10.6109	37.1207	6.07086	57.9812	8.38429	340.491	38.7272	1156.98	407.426	14264.5	1.16068	1.59922	52.1764	1	1	189.516	3.26081	66.0872	120.168	36.8522	0.725781	0.0334726	928.795
1634	0.0156499	1.56262	0.0360345	0.733669	2.03876	0.0852914	6.48191	0.906225	3.61238	0.385919	0.603779	0.0599112	0.320025	0.0638214	152.628	75.8498	291.881	14.7323	12716.7	0.398674	0.213248	48.2553	1	1	16.906	2.34797	13.1246	1.43346	0.610508	1.86953	0.259865	918.67
1635	0.00451062	1.29004	0.0484646	0.935361	2.53463	0.13764	9.14671	1.16658	5.50707	0.790649	1.70742	0.189886	1.38875	0.151315	178.403	80.6187	363.204	30.0644	12552.4	0.255376	0.052115	55.7565	1	1	24.999	2.27838	18.4926	4.22802	1.85571	4.90024	0.221965	937.533
1636	0.076078	1.26351	0.141252	1.5658	3.38215	0.247086	14.414	4.06818	28.7981	4.60804	12.9991	1.72394	15.9704	2.04698	229.163	19.5808	1092.05	170.398	13359.2	0.488707	0.674753	48.3514	1	1	91.3046	3.04664	50.9094	37.3485	12.2589	0.724275	0.0179303	918.926
1637	0.0597604	0.596223	0.0356681	0.776657	2.39305	0.253189	21.2573	6.43247	36.7374	4.04288	6.62746	0.694176	5.18953	0.822007	314.077	20.5073	1120.67	142.844	14262.3	0.354898	0.537912	51.765	1	1	85.9178	1.46831	67.0734	17.3761	11.8341	0.659769	0.0182992	927.762
1638	0.00655815	0.849692	0.0285165	0.717234	3.22357	0.177562	16.4563	2.69485	11.7846	1.43673	2.50657	0.309265	2.2068	0.37757	160.35	39.2291	486.903	50.7405	13472.1	0.503481	0.322962	55.1317	1	1	42.7758	1.602	34.3368	6.83693	4.26775	1.55895	0.0805685	936.04
1639	0.0733345	0.605242	0.0364053	0.402918	1.64038	0.131502	13.583	4.99036	39.8095	7.03203	19.0403	2.87026	24.439	3.67186	315.865	19.7203	1159.45	263.569	14490	0.44815	0.662402	47.3367	1	1	118.326	1.1179	60.1547	57.0535	51.0363	0.676553	0.0170084	916.205
1640	0.00898175	1.59071	0.0482677	0.910485	2.67632	0.12668	7.31462	0.832619	3.41079	0.510301	1.46602	0.2847	3.21679	0.578337	153.006	18.246	261.44	19.9137	12171	0.237284	0.106515	46.9236	1	1	22.9756	2.55845	14.361	6.05615	2.36712	2.22771	0.0697904	915.084
1641	0.0602567	1.19984	0.0325281	0.50836	1.97388	0.126607	12.8429	3.22599	22.0521	4.78553	19.4136	4.32396	57.2053	10.2624	213.479	28.6368	696.5	175.983	13362.2	1.08758	0.992606	52.0152	1	1	138.013	1.80099	40.2216	95.9908	53.2991	1.09568	0.0411153	928.391
1642	0.09	13.45	0.14	0.27	1	0.73	6.9	2.37	29.71	9.33	36.87	9.07	88.23	16.84	16.2	54.1	294.3	324.4	36228	7.88	0.85	46.94	1	1	215	13.95	40.71	160.34	11.4939	9.27059	0.183826	915.129
1643	0.02	6.77	0.06	0.62	1.71	0.7	5.66	2.37	25.42	7.26	27.86	5.01	42.12	8.35	21.1	68.4	431.4	245.8	34360	3.3	0.85	46.48	1	1	133.93	7.47	35.86	90.6	12.1285	3.88235	0.158554	913.872
1644	0.17	4.69	0.05	0.07	0.37	0.39	3.61	1.18	10.87	2.77	9.54	1.72	13.41	2.46	13.2	31.8	290.2	94.9	34877	2.01	0.85	49.91	1	1	51.3	4.98	16.42	29.9	6.00402	2.36471	0.10958	923.019
1645	0.02	5.46	0.05	0.71	0.9	0.76	8.49	3.11	33.64	10.59	39.42	7.17	59.37	9.89	22.5	55.3	589.9	340.4	35209	2.13	0.85	47.59	1	1	179.58	6.24	46.9	126.44	20.2628	2.50588	0.0937447	916.888
1646	0.16	4.02	0.05	0.32	0.75	0.29	4.18	1.61	15.65	5	19.75	3.56	35.62	5.99	11.9	31.2	310.3	164.6	35438	1.92	0.85	44.08	1	1	96.95	4.55	22.48	69.92	15.367	2.25882	0.100548	907.151
1647	0.02	10.37	0.26	1.73	1.89	0.87	8.06	2.42	22.45	6.91	26.55	5.72	53.18	11.01	29.2	42	652.1	1585.4	35004	17.84	0.85	45.91	1	1	151.44	12.38	35.69	103.37	8.34976	20.9882	0.0644073	912.301
1648	0.15	6.37	0.05	0.62	0.13	0.66	7.24	1.84	18.36	4.82	16.52	3.27	34.47	5.84	25.6	42.3	628.1	706.1	33969	7.76	0.85	45.6	1	1	100.34	7.19	28.23	64.92	9.02921	9.12941	0.067346	911.44
1649	0.16	6.06	0.09	0.62	1.5	0.85	4.66	1.63	17.67	7.33	26.47	7.35	49.42	13.17	62.6	32.9	1371.8	152.5	40349	3.71	0.85	34.49	1	1	136.98	6.93	26.31	103.74	14.9697	4.36471	0.0239831	877.017
1650	0.02	10.46	0.04	0.23	1.14	1.44	8.49	3.28	26.13	7.85	28.35	6.25	59.18	11.11	28.5	59.4	557.9	318.1	45178	3.47	0.85	73.5	1	1	163.97	10.75	40.48	112.74	10.4874	4.08235	0.106471	975.318
1651	0.14	12.02	0.06	0.4	1.44	0.27	3.53	2.53	29.03	11.89	40.49	9.57	66.53	15.23	14.1	38.5	281.9	244.6	44416	2.53	0.85	79.9	1	1	193.13	12.62	36.8	143.71	11.3875	2.97647	0.136573	987.204
1652	0.02	18.73	0.05	0.62	3.2	1.08	15.05	4.08	36.09	13.01	40.59	9.89	73.08	16.82	52.1	39.7	1194	281.6	48023	4.71	0.85	33.82	1	1	232.31	19.42	59.5	153.39	7.89856	5.54118	0.0332496	874.674
1653	0.2	3.76	0.05	0.62	1.45	0.35	4.25	2.07	19.81	7.16	22.54	4.53	34.44	7.26	32.2	42.4	562.4	151.9	46906	3.99	0.85	55.71	1	1	108.49	4.63	27.93	75.93	16.3996	4.69412	0.0753912	937.422
1654	0.02	6.36	0.09	0.62	1.44	0.59	5.41	2.62	18.9	6.25	21.44	4.51	29.65	6.55	15.3	44.5	348.3	152.1	48396	2.4	0.85	65.98	1	1	104.45	7.09	28.96	68.4	9.64739	2.82353	0.127763	960.28
1655	0.02	1.95	0.02	0.62	1.65	0.49	3.13	1.58	27.56	9.16	31.94	8.12	57.98	11.93	24.3	34.7	474	212.8	42343	2.28	0.85	47.91	1	1	156.15	2.61	34.41	119.13	45.6437	2.68235	0.0732068	917.747
1656	0.46	5.44	0.05	0.62	1.44	1.33	7.73	2.73	23.81	9.19	28.15	7.24	50.24	11.16	24.2	51.7	467.9	183.7	40929	4.45	0.85	49.22	1	1	149.59	6.57	37.04	105.98	16.1309	5.23529	0.110494	921.219
1657	1.1	9.39	0.18	2.26	1.52	0.58	10.06	2.46	26.09	9.43	29.98	7.5	65.97	17.22	31.4	57.1	430.1	205.5	41333	2.58	0.85	65.57	1	1	183.74	12.93	40.71	130.1	10.0619	3.03529	0.13276	959.422
1658	0.19	4.62	0.28	1.31	1.79	0.71	5.76	2.2	21.77	8.07	27.43	6.17	43.31	9.94	42.4	73	443.1	473.4	43023	2.11	0.85	90.08	1	1	133.55	6.4	32.23	94.92	14.8313	2.48235	0.164748	1004.68
1659	0.22	5.99	0.04	0.62	1.69	1.05	6.89	3.01	27.48	10.33	30.77	7.02	49.11	11.03	32.9	74.9	657.3	215.5	43215	3.19	0.85	68.46	1	1	155.25	6.87	40.12	108.26	15.7584	3.75294	0.113951	965.38
1660	0.06	4.14	0.05	0.49	1.6	0.24	3.47	1.17	10.9	2.84	10.03	2.17	18.13	2.9	20.1	34	511.4	112.3	48944	0.98	0.85	27.66	1	1	58.19	4.74	17.38	36.07	7.6097	1.15294	0.0664842	851.196
1661	0.14	6.33	0.08	0.62	1.3	0.52	3.26	1.71	20.82	8.09	40.73	8.88	102.73	20.11	16.1	28.6	329.5	328.3	42475	1.59	0.85	40.45	1	1	215.32	7.17	27.61	180.54	25.1799	1.87059	0.0867982	896.417
1662	0.02	6.21	0.05	0.38	1.44	0.32	2.59	1.51	21.07	7.79	32.93	6.63	72.85	12.9	14.8	48.5	297.9	298.9	47982	2.08	0.85	53.93	1	1	166.69	6.66	26.93	133.1	19.985	2.44706	0.162806	933.132
1663	2.26	16.32	1.25	8.57	3.2	1.85	7.61	3.26	49.47	26.85	180.34	62.13	864.64	241.94	140.9	62.9	245	1081.4	47168	23.73	0.85	12.45	1	1	1469.69	28.4	65.39	1375.9	48.4472	27.9176	0.256735	766.75
1664	0.02	12.85	0.05	0.99	1.52	0.59	8.69	4.59	76.6	39.82	242.57	68.71	804.51	200.37	54.2	88.6	2550.4	1409.8	39011	15.96	0.85	4.51	1	1	1461.88	13.91	91.99	1355.98	97.4824	18.7765	0.0347396	676.062
1665	0.09	5.86	0.05	0.12	0.5	0.15	4.02	2.54	42.21	23.26	133.57	39.92	463.35	105.11	29.9	30	1446.2	781.6	35371	10.39	0.85	8.75	1	1	820.75	6.12	49.42	765.21	125.034	12.2235	0.020744	733.352
1666	0.02	9.44	0.05	0.62	0.81	0.66	6.16	4.06	61.49	31.37	188.05	53.98	638.75	153.59	43.3	45.8	2110.9	1129.5	34003	10.6	0.85	10.87	1	1	1149.05	10.13	73.18	1065.74	105.206	12.4706	0.0216969	753.638
1667	0.02	14.97	0.05	0.08	0.75	0.69	6.06	2.72	42.75	20.47	117.58	36.08	466.88	105.71	24.7	68.6	1026.5	723.9	28870	5.63	0.85	6.72	1	1	814.81	15.12	52.97	746.72	49.3862	6.62353	0.066829	709.725
1668	1.82	23.63	1.18	7.32	3.3	1.14	9.78	4.52	66.32	34.08	195.4	57.53	695.86	186.76	85.1	183.1	3582.9	1238.6	38128	13.76	0.85	10.41	1	1	1288.64	33.95	85.06	1169.63	34.4515	16.1882	0.0511039	749.53
1669	0.58	10.08	0.25	1.59	2.49	0.83	14.06	7.36	137.32	74.4	418.22	119.26	1364.66	285.32	66.3	81.1	3211.6	2471.7	36226	39.48	0.85	19.01	1	1	2436.42	12.5	162.06	2261.86	180.949	46.4471	0.0252522	809.878
1670	3.64	26.51	2.08	12.14	2.81	1.53	9.37	2.16	29.87	14.23	79.79	23.58	309.4	84.58	40.2	78.9	1409.4	510.8	31885	3.54	0.85	23.96	1	1	601.69	44.37	45.74	511.58	11.5299	4.16471	0.0559813	835.008
1671	0.12	15.73	0.07	0.46	0.65	0.66	8.49	2.92	51.7	23.45	145.66	44.42	590.14	148.01	53.4	104	2353.2	885.1	31172	5.64	0.85	4.3	1	1	1032.48	16.38	64.42	951.68	58.1001	6.63529	0.0441951	672.191
1672	0.02	8.3	0.05	0.62	1.27	0.47	4.77	2.25	36	19.45	118.67	36.7	483.86	133.37	32.1	37.5	1392.8	695.7	32949	3.48	0.85	4.8	1	1	845.8	8.99	44.76	792.05	88.1034	4.09412	0.0269242	681.17
1673	0.03	11.79	0.05	0.62	0.54	0.68	9.51	5.09	91.15	47.39	273.01	71.2	692.27	141.37	28.8	84.9	936.2	228.2	33549	1.77	0.85	39.81	1	1	1344.7	12.49	106.97	1225.24	98.0977	2.08235	0.0906858	894.447
1674	0.12	12.31	0.06	0.67	0.98	0.81	12.48	5.56	92.11	47.68	274.95	78.26	931.55	212.15	65.3	76.7	3198.2	1614.8	34512	16.25	0.85	9.4	1	1	1669.69	13.16	111.94	1544.59	117.37	19.1176	0.0239822	739.963
1675	0.07	15.42	0.09	0.62	0.55	0.61	4.92	2.35	38.9	18.07	115.54	37.39	489.74	123.4	29.9	80.8	1211.1	696.3	33142	5.57	0.85	7.64	1	1	847.67	16.2	47.33	784.14	48.4037	6.55294	0.0667162	721.07
1676	0.18	8.69	0.04	0.34	0.82	0.6	8.95	3.03	43.19	20.8	123.7	37.7	494.41	118.67	31.8	57.8	1455.9	760.3	33697	4.09	0.85	23.6	1	1	861.12	9.25	56.59	795.28	85.9762	4.81176	0.0397005	833.328
1677	0.02	9.21	0.01	0.62	1.38	0.46	4.42	2.05	35.19	16.87	102.15	32.29	413.96	105.39	34.4	41.3	1710.1	616.2	32360	4.6	0.85	8.38	1	1	724.02	9.86	43.5	670.66	68.0183	5.41176	0.0241506	729.407
1678	0.03	13.59	0.05	0.5	1.94	0.51	5.05	2.59	41.85	22.06	123.47	39.26	506.25	124.71	30.4	63.7	1335.7	748.1	31910	4.8	0.85	6.12	1	1	881.86	14.17	51.94	815.75	57.5688	5.64706	0.0476903	701.618
1679	0.44	13.96	0.05	1.11	1.19	1.36	13.34	5	64.4	38.15	189.16	59.45	571.83	183.13	66.8	110.5	2295.3	903.9	50034	13.35	0.85	4.03	1	1	1142.57	15.56	85.29	1041.72	66.9486	15.7059	0.0481419	666.977
1680	0.02	23.29	0.15	0.45	2.39	0.72	7.19	3.37	38.04	20.59	106.48	36.27	366.2	118.72	28	107.9	904.6	517.54	42474	5.29	0.85	2.13	1	1	723.88	23.91	51.71	648.26	27.1125	6.22353	0.119279	618.609
1681	0.62	22.62	0.36	3.93	5.68	3.31	58	25.53	308.89	141.81	574.62	152.21	1158.7	302.15	60.3	164.3	1872.1	2986.83	34335	23.3	0.85	16.09	1	1	2758.43	27.53	401.41	2329.49	84.6164	27.4118	0.0877624	792.464
1682	0.02	31.05	0.05	1.37	0.95	0.76	11.16	4.79	59.59	29.89	151.39	52.67	497.95	153.46	38.1	159.2	1189.8	742.75	39689	9.65	0.85	10.45	1	1	995.1	32.49	77.25	885.36	27.2502	11.3529	0.133804	749.893
1683	0.06	11.7	0.21	2.13	8.19	15.1	41.5	44.6	66.3	75.6	88.3	87.5	112	130	38.3	58	1232	152	10900	0.15	0.025	1.14	0.5	0.5	683.19	14.1	175.69	493.4	34.9929	6	0.0470779	575.792
1684	0.06	3.25	0	0.58	1.66	7.48	13.2	10.7	19.3	26.1	28.1	36.5	51.4	70.5	12	6.95	382	55.8	10931	0.078	0.025	0.36	0.5	0.5	268.83	3.89	52.34	212.6	54.653	3.12	0.0181937	506.742
1685	2.99	25.5	6.8	8.35	31	40.3	106	116	131	142	149	155	192	229	104	136	3287	289	11548	0.02	0.003	1	0.5	0.5	1334.94	43.64	424.3	867	19.8671	6.66667	0.0413751	567.333
1686	3.47	20.6	3.23	3.09	4.97	7.49	26.9	32.7	55.6	78.4	103	138	177	244	27.5	206	1259	167	7340	0.091	0.007	2.27	0.5	0.5	898.45	30.39	127.66	740.4	24.3633	13	0.163622	623.213
1687	1.25	52.4	2.16	4.46	28.9	17.9	179	3.45	40.8	16.42	80.1	20.06	4937	41.89	149	1714	245	2432	11158	25.3	14	2.88	0.5	0.5	5425.79	60.27	270.05	5095.47	84.5441	1.80714	6.99592	640.856
1688	3.59	18.6	0.88	1.35	14.9	8.59	90.5	193	406	16.42	1386	20.06	3449	41.89	87.9	472	4149	1488	13092	9.23	8.35	8.98	0.5	0.5	5650.78	24.42	712.99	4913.37	201.203	1.10539	0.113762	735.736
1689	0.133	28.4	0.842	2.84	16.4	25.1	75.9	160	308	16.42	939	20.06	2129	41.89	18.3	79.8	265	975	8600	2.66	1.04	8.93	1	0.5	3763.99	32.215	585.4	3146.37	97.6679	2.55769	0.301132	803.296
1690	1.37	23.8	2.79	13.8	55.2	29.6	67	73.9	101	157	213	335	625	41.89	260	52.41	245	381	12159	0.67	0.36	5.99	1	0.5	1740.35	41.76	326.7	1371.89	32.8518	1.86111	0.213918	762.998
1691	0	3.08	0.036	0.57	2	3	5.97	9.3	10.8	16.7	18.8	26.5	29.9	39.6	13.8	15.1	671	34.5	8371	0.1	0.026	0.29	1	0.5	166.256	3.686	31.07	131.5	35.6755	3.84615	0.0225037	533.902
1692	2.89	30.9	2.47	10	45.5	40.7	110	143	204	289	398	20.06	812	41.89	159	1615	245	665	11746	0.98	0.68	0.47	1	0.5	2150.41	46.26	543.2	1560.95	33.743	1.44118	6.59184	563.397
1693	2.42	22.8	1.62	8.43	47.8	62.1	125	138	181	217	262	281	339	406	210	278	245	450	9812	0.5	0.44	2.7	1	0.5	2094.17	35.27	553.9	1505	42.6708	1.13636	1.13469	690.975
1694	0	3.48	0	0	0.18	0	0	1.07	2.02	3.87	4.55	5.57	8.18	14.7	2.88	10.6	87.7	7.83	9583	0.13	0.021	0.61	1	0.5	43.62	3.48	3.27	36.87	10.5948	6.19048	0.120867	580.238
1695	0.119	2.32	0.137	0.11	1.87	1.43	1.93	4.07	4.81	8.37	8.04	11.2	11.8	15	2.95	5.74	90.7	14.8	10100	0.052	0.005	0.72	1	0.5	71.206	2.686	14.11	54.41	20.2569	10.4	0.0632856	591.304
1696	0.167	5.34	0.18	0.4	1.97	2.94	9.2	8.7	11.3	16.4	19.7	23.1	30.9	39.2	4.15	21.6	129	29.7	9380	0.088	0.003	2.11	1	0.5	169.497	6.087	34.11	129.3	21.242	29.3333	0.167442	670.675
1697	0.042	14.2	0.12	0.73	3.2	6.98	13.4	12.8	17.6	21.4	23.8	23.8	31.8	38	11.2	104	355	41.7	9337	0.14	0.009	0.3	0.5	0.5	207.872	15.092	53.98	138.8	9.19693	15.5556	0.292958	496.836
1698	0.149	3.17	0.07	0.34	1.33	2.37	4.04	4.09	6.21	9.31	11.1	11	16.8	22.1	4.46	11.9	124	19.6	10308	0.065	0.006	4.04	0.5	0.5	92.079	3.729	18.04	70.31	18.8549	10.8333	0.0959677	667.175
1699	2.61	49.8	2.57	4.22	27.8	28.9	68.3	83.6	100	117	129	149	192	230	20.4	56.7	585	218	7652	0.29	0.034	0.55	0.5	0.5	1184.8	59.2	308.6	817	13.8007	8.52941	0.0969231	530.784
1700	0.757	5.18	0.189	0.56	1.59	1.75	8.04	7.42	15.9	21.4	28.3	33.4	43.1	65.6	5.94	21.3	179	44.5	9565	0.12	0.006	2.5	0.5	0.5	233.186	6.686	34.7	191.8	28.6868	20	0.118994	630.284
1701	0.021	3.07	0	0.22	2.56	3.46	4.24	7.51	8.16	9.7	14.5	13.7	21	30.1	4.06	11.6	137	25.1	9844	0.041	0.009	0.33	0.5	0.5	118.241	3.311	25.93	89	26.8801	4.55556	0.0846715	501.983
1702	0.038	11.9	0.23	0.76	2.89	4.49	12.5	12.1	15.2	19.6	24.9	32.7	35.7	54.1	5.04	72.8	230	40.9	6105	0.054	0.003	0.54	0.5	0.5	227.108	12.928	47.18	167	12.9177	18	0.316522	529.713
1703	0.16	3.2	0.095	1.61	2.41	4.8	7.56	8.31	11.5	17.7	22	27.4	40.9	49.8	6.69	29.4	184	37.2	8264	3.95	0.254	1.32	0.5	0.5	197.445	5.065	34.58	157.8	31.155	15.5512	0.159783	585.461
1704	0.019	3.26	0.135	0.28	1.7	1.8	3.68	6.5	10.3	12.6	17.2	20.1	28.5	37.1	3.65	7.58	109	28.3	9874	0.12	0	0.12	0.5	0.5	143.174	3.694	23.98	115.5	31.2669	0	0.0695413	450.633
1705	0.107	2.73	0	0.13	1.16	0.74	6.48	7.42	8.2	12.1	12.8	14.1	22.1	30	5.32	9.3	127	24.6	9822	0.076	0	0.43	0.5	0.5	118.067	2.967	24	91.1	30.7044	0	0.0732283	516.644
1706	0.17	2.33	0	0.19	0.82	1.39	2.3	3.23	6.4	9.69	10.9	11.3	19.3	22.7	2.8	7.47	92.8	18.3	9972	0.065	0.01	3.75	0.5	0.5	90.72	2.69	14.14	73.89	27.4684	6.5	0.0804957	661.253
1707	0.038	2.54	0.033	0.2	1.56	2.98	6.5	6.72	12.4	13.1	17.2	16.4	26.8	34.5	3.94	6.52	125	30.8	10067	0.096	0.013	0.27	0.5	0.5	140.971	2.811	30.16	108	38.4205	7.38462	0.05216	491.225
1708	0	8.12	0.013	0.34	0.86	0.23	8.52	3.95	59.5	30.3	176	47.2	548	130	81.6	519	3853	1072	11866	5.87	2.11	1.53	1	0.5	1013.03	8.473	73.06	931.5	109.937	2.78199	0.1347	645.461
1709	0.094	22.5	0.02	0.71	1.49	0.17	9.45	4.19	52.3	20.4	97	19.7	190	37.3	191	260	394	619	10888	3.5	1.47	8.64	1	0.5	455.324	23.324	67.6	364.4	15.6234	2.38095	0.659898	799.846
1710	0.016	2.85	0.003	0.88	3.03	0.67	19.9	8.16	112	50.2	274	69.5	765	168	55.8	112	2736	1662	10632	3.62	2.04	1.81	1	0.5	1474.21	3.749	143.76	1326.7	353.881	1.77451	0.0409357	658.474
1711	0.026	8.78	0.01	0.13	0.82	0.2	7.19	3.5	54.6	27.7	164	46.1	566	148	99.3	602	4639	1021	11574	3.34	0.99	1.6	1	0.5	1027.06	8.946	66.31	951.8	106.394	3.37374	0.129769	648.89
1712	0.082	2.55	0.026	0.022	0.36	0.16	2.66	0.94	15.4	7.5	40.1	10.1	124	31.7	14.4	25	715	250	9320	0.49	0.27	2.15	1	0.5	235.6	2.68	19.52	213.4	79.6269	1.81481	0.034965	672.191
1713	0.011	3.42	0.02	0.55	0.87	0.33	10.3	4.63	73.3	36.6	217	58.4	686	157	116	172	5601	1310	9668	6.17	2.85	7.21	1	0.5	1248.43	4.001	89.43	1155	288.678	2.16491	0.0307088	781.323
1714	0.031	1.19	0.019	0.091	0.26	0.12	5.37	2.45	41.6	20.7	120	32.7	382	89.4	24.1	30	1177	707	10717	2.84	1.92	2.01	1	0.5	695.931	1.331	49.8	644.8	484.448	1.47917	0.0254885	666.778
1715	0.063	11.1	0.032	0.48	2.73	0.21	18.4	6.94	86.2	32.8	146	29.7	273	51.4	166	225	409	975	10597	2.58	1.95	5.29	1	0.5	659.055	11.675	114.48	532.9	45.6445	1.32308	0.550122	751.065
1716	0.254	10.3	0.127	1.18	0.73	0.32	6.06	2.79	43.5	23.8	153	45	612	172	137	384	245	918	14112	4.5	1.85	1.81	1	0.5	1071.06	11.861	53.4	1005.8	84.7989	2.43243	1.56735	658.474
1717	0	11	0	0.42	2.66	0.47	15.1	5.53	69.6	28.5	137	29.4	292	58.7	220	146	442	862	8608	2.13	1.6	7.05	1	0.5	650.38	11.42	93.36	545.6	47.7758	1.33125	0.330317	779.071
1718	0.002	7.94	0.006	0.43	0.81	0.12	8.54	3.74	59.6	29.1	174	46.4	555	132	71.6	367	3369	1042	10838	8.23	4.75	3.4	1	0.5	1017.69	8.378	72.81	936.5	111.781	1.73263	0.108934	710.761
1719	0.089	8.08	0.073	0.48	0.43	0.2	3.84	1.82	27.7	13.9	82.6	22	277	71	72.7	426	3327	502	11706	1.84	0.73	2.82	1	0.5	509.212	8.722	33.99	466.5	53.4854	2.52055	0.128043	694.646
1720	0.032	15.8	0.026	0.55	2.84	0.23	21.06	8.32	110.2	44.6	216	46.6	436	85.7	409	356	697	1097	10891	5.91	2.93	9	1	0.5	987.958	16.408	142.65	828.9	50.518	2.01706	0.51076	804.115
1721	0.029	6.84	0.029	0.13	0.38	0.13	5.24	2.2	30.5	13.5	67.2	15.8	158	32.2	177	104	434	436	11439	2.83	2.34	25.79	1	0.5	332.178	7.028	38.45	286.7	40.794	1.2094	0.239631	927.295
1722	0	8.96	0.038	0.15	0.41	0.24	7.79	3.91	59.3	29.7	178	48.2	573	137	89	530	4196	1085	11478	6.72	3.19	1.64	1	0.5	1046.7	9.148	71.65	965.9	105.586	2.10658	0.126311	650.793
1723	0.061	8.36	0.105	1.09	0.7	0.16	3.53	1.28	17.9	8.1	44.1	11.2	130	28.3	255	103	547	285	11140	1.39	1.69	15.03	1	0.5	254.886	9.616	23.57	221.7	23.0553	0.822485	0.1883	860.795
1724	0.081	10.6	0.044	0.25	1.03	0.28	5.91	2.21	31.1	11.8	56.5	12.3	123	24.2	148	119	335	365	9443	1.85	0.84	7.56	1	0.5	279.305	10.975	40.53	227.8	20.7563	2.20238	0.355224	786.114
1725	0	1.04	0	0	0.42	0.15	4.77	2.36	42.9	23.2	152	46.3	584	145	65.8	29.8	3234	929	9281	2.66	1.54	0.79	1	0.5	1002.14	1.04	50.6	950.5	913.942	1.72727	0.00921459	597.623
1726	0	2.18	0	0.16	0.81	0.15	4.04	1.95	31.2	14.1	79.9	19.8	232	52.1	33.5	57.3	1653	479	10461	2.6	1.38	4.36	1	0.5	438.39	2.34	38.15	397.9	170.043	1.88406	0.0346642	733.037
1727	0	1.36	0.01	0.13	0.66	0.16	5.01	2.74	39.5	15.3	80.9	29.1	311	77.3	13.9	60.2	1677	484	11601	2.45	1.63	0.68	1	0.5	563.17	1.5	48.07	513.6	342.4	1.50307	0.0358974	587.457
1728	0.002	8.92	0.036	0.12	0.69	0.22	6.13	3.45	51.7	25.1	152	43.3	522	120	84.7	448	3832	942	10523	6.4	2.64	0.69	1	0.5	933.668	9.078	62.19	862.4	94.9989	2.42424	0.11691	588.436
1729	0.029	10.4	0.022	0	0.83	0.28	6.67	3.14	45	21.9	126	35.2	428	109	107	914	4960	807	11376	2.75	1.3	2.46	1	0.5	786.471	10.451	55.92	720.1	68.9025	2.11538	0.184274	683.209
1730	0.012	8.78	0	0.21	1.4	0.25	9.92	4.05	62.5	31.2	179	48	557	134	93.8	603	4370	1106	10773	5.37	2.47	2.07	1	0.5	1036.32	9.002	78.12	949.2	105.443	2.17409	0.137986	669.135
1731	0.093	1.04	0.009	0.16	0.36	0.15	4.92	2.62	42.9	21.7	132	37.3	473	113	55.4	31	2687	843	10395	2.82	1.62	2.36	1	0.5	829.252	1.302	50.95	777	596.774	1.74074	0.011537	679.787
1732	0.01	2.24	0	0.3	0.47	0.35	8.42	3.85	65.8	34.7	218	63.5	776	185	116	55.9	5514	1364	10423	10	5.23	2.5	1	0.5	1358.64	2.55	78.89	1277.2	500.863	1.91205	0.0101378	684.546
1733	0.037	2.4	0.002	0.053	0.236	0.059	1.18	0.71	11.2	6	36.5	10.2	131	34.2	35.7	66.5	1746	211	17113	1.52	1.2	0.74	1	0.5	233.777	2.492	13.385	217.9	87.4398	1.26667	0.0380871	593.161
1734	0.11	7	0.037	0.515	0.646	0.24	5.72	3.06	46.3	22.7	136	38.1	460	118	128	307	245	821	16243	4.01	1.67	6.29	1	0.5	838.428	7.662	55.966	774.8	101.122	2.4012	1.25306	767.767
1735	0.017	13.5	0.018	0.756	1.28	0.454	12.34	5.45	76.2	35.7	198	53.2	613	154	234.6	1062	245	1260	14382	6.92	4.24	1.29	1	0.5	1163.91	14.291	95.724	1053.9	73.7457	1.63208	4.33469	632.616
1736	0	3.17	0.003	0.014	0.255	0.106	2.56	1.13	17.4	9.4	56.7	15.5	187	47.3	27.7	134	1373	334	13491	2.01	1.75	0.33	1	0.5	340.538	3.187	21.451	315.9	99.1214	1.14857	0.0975965	541.589
1737	0.373	14	0.369	1.65	1.19	0.39	8.73	3.55	52.2	24.1	140	37.4	454	118	151.1	822	245	858	12360	2.48	1.28	3.1	1	0.5	855.952	16.392	66.06	773.5	47.1877	1.9375	3.3551	702.736
1738	0	6.57	0	0.276	0.663	0.211	5.39	2.56	35.4	16.1	90.2	24.5	284	69.2	67.5	464	3188	578	12215	3.02	2.12	1.55	1	0.5	535.07	6.846	44.224	484	70.6982	1.42453	0.145546	646.454
1739	0	6.33	0.025	0.529	1.6	0.289	11.4	4.52	63	28.7	161	42.9	498	123	75.1	514	3565	1002	11536	3.61	2.84	1.28	1	0.5	941.293	6.884	80.809	853.6	123.998	1.27113	0.14418	632.039
1740	0.025	10.1	0.027	0.168	0.932	0.356	6.46	3.03	45.1	21.3	117	30.9	358	87.2	72.2	536	3396	764	12229	3.8	2.48	1.97	1	0.5	680.598	10.32	55.878	614.4	59.5349	1.53226	0.157833	665.174
1741	0.406	11.6	0.33	1.55	1.72	0.489	7.28	3.13	43.7	19.5	111	30	366	93.3	104	704	4903	712	12409	2.82	1.4	14.6	1	0.5	690.005	13.886	56.319	619.8	44.6349	2.01429	0.143586	857.428
1742	0.042	15.7	0.041	0.579	1.23	0.461	13.7	5.79	81.6	36.9	210	56.9	658	164	261	1208	245	1330	15905	7.67	6.61	2.15	1	0.5	1244.94	16.362	102.781	1125.8	68.8058	1.16036	4.93061	672.191
1743	0.02	8.21	0.036	0.342	1.34	0.344	10.9	4	62	28.3	161	42.9	505	120	87.5	558	3950	1015	12224	5.28	2.41	7.17	1	0.5	944.392	8.608	78.584	857.2	99.5818	2.19087	0.141266	780.764
1744	0.023	11.5	0.043	0.72	1.26	0.324	9.07	3.76	54.8	25.8	147	40.3	463	116	12	791.6	5481	905	12293	5.35	3.12	7.32	1	0.5	873.6	12.286	69.214	792.1	64.4718	1.71474	0.144426	782.849
1745	0.076	9.16	0.036	0.096	0.7	0.33	7.74	3.29	51.9	25.4	149	41	488	121	83.9	474.7	3913	912	12674	4.87	2.43	2.24	1	0.5	897.728	9.368	63.96	824.4	88.0017	2.00412	0.121314	675.519
1746	0.044	9.48	0.047	0.972	1.49	0.597	14.7	5.63	76.9	34.9	192	52	611	148	95.8	637.1	4396	1208	12397	4.01	2.72	4.45	1	0.5	1147.76	10.543	99.317	1037.9	98.4445	1.47426	0.144927	734.912
1747	0.026	9.82	0.084	1.374	3.55	0.373	19.1	5.81	67.5	23.8	104	22.6	211	39.2	50.8	67.2	106	712	10067	1.93	0.82	3.87	1	0.5	508.237	11.304	96.333	400.6	35.4388	2.35366	0.633962	722.234
1748	0.036	13.7	0.098	1.486	2.32	0.253	13.9	4.22	53	18.8	87.1	18.7	182	33.2	49.1	71.7	119	570	10116	2.85	0.92	3.15	1	0.5	428.813	15.32	73.693	339.8	22.1802	3.09783	0.602521	704.116
1749	0.005	10.3	0.06	0.626	0.87	0.38	7.8	3.58	54.6	26.5	157	43.2	534	134	97	472.7	4365	952	12680	5.63	3.42	5.64	1	0.5	972.921	10.991	67.23	894.7	81.403	1.6462	0.108293	757.182
1750	0.014	7.93	0.029	0.385	1.75	0.565	11.7	4.35	64.7	29.8	163	43	497	119	69.8	535.1	3243	1024	12540	2.8	1.82	1.56	1	0.5	943.223	8.358	83.065	851.8	101.914	1.53846	0.165002	646.946
1751	0	9.42	0.011	0.389	1.13	0.424	8.75	3.83	57.8	28.4	169	48.1	595	152	86.9	490.9	4065	1016	12438	5.9	4.14	2.11	1	0.5	1074.25	9.82	71.934	992.5	101.069	1.42512	0.120763	670.675
1752	0.007	9.68	0.123	1.812	3.46	0.764	22.9	8.97	125	54.6	294	72.8	800	184	93.3	889.9	4285	1863	10883	3.35	2.28	1.77	1	0.5	1578.12	11.622	161.094	1405.4	120.926	1.4693	0.207678	656.723
1753	0.261	11.1	0.107	1.016	3.13	0.127	16.6	6.24	75.8	28.7	133	28.4	266	51	203	179.3	529	894	11776	3.31	1.07	8.36	1	0.5	621.481	12.484	101.897	507.1	40.62	3.09346	0.338941	796.425
1754	0.008	9.16	0.035	0.291	1.05	0.043	8.11	2.72	35	12.3	53.6	10.8	94.9	17.4	29.8	74.5	66.4	379	10440	3.53	1.19	4.33	1	0.5	245.417	9.494	46.923	189	19.9073	2.96639	1.12199	732.405
1755	0	7	0.019	0.04	0.7	0.296	6.97	2.88	47.8	22.3	130	35.6	421	104	68.8	401	3242	796	12241	3.98	2.01	1.225	1	0.5	778.605	7.059	58.646	712.9	100.992	1.9801	0.123689	628.795
1756	0.145	16.9	0.097	0.977	2.26	0.438	16.72	6.41	92.9	41.3	222	56.5	631	145	165.3	1730.6	245	1424	10834	7.6	3.72	3.71	1	0.5	1232.65	18.119	118.728	1095.8	60.478	2.04301	7.06367	718.463
1757	0.005	6.68	0.023	0.119	1.13	0.195	7.05	2.3	26.5	10.3	49.1	11	108	22.3	66.2	60.1	138	320	9784	1.14	0.4	4.35	1	0.5	244.702	6.827	37.175	200.7	29.398	2.85	0.435507	732.827
1758	0.002	5.33	0.017	0.256	0.52	0.124	4.92	2.33	34.9	17.3	102	27.5	325	80.4	49.5	255.3	2380	615	12264	3.67	1.77	1.31	1	0.5	600.599	5.605	42.794	552.2	98.5192	2.07345	0.107269	633.76
1759	0.017	8.32	0.005	0.233	0.64	0.233	7.5	3.28	50.3	24.6	140	37.5	443	108	85.5	474.5	4001	846	12985	3.83	1.66	1.95	1	0.5	823.628	8.575	61.953	753.1	87.8251	2.30723	0.118595	664.362
1760	0.229	12	0.146	0.918	1.14	0.44	7.65	3.34	47.9	22.1	126	33.4	387	95.8	105.2	703.1	4892	784	12681	3.86	2.34	1.55	1	0.5	738.063	13.293	60.47	664.3	49.9737	1.64957	0.143724	646.454
1761	0.26	37.1	0.18	0.89	4.4	1.13	17.7	8.25	140	69.9	438	121	1620	343	82.3	102	2646	2696	34854	238	121	7.5	1	1	2801.81	38.43	171.48	2591.9	67.4447	1.96694	0.0385488	719.418
1762	0.28	26.5	0.37	0.57	2.57	0.86	10.9	4.95	89.7	45.4	293	83.9	1123	244	62.2	51.2	1928	1774	34861	170	93.3	17	1	1	1926	27.72	108.98	1789.3	64.5491	1.82208	0.026556	798.147
1763	0	17	0	1.67	1.05	1.16	12.4	5.59	95.9	48.8	318	89.3	1216	287	62	50.6	2030	1906	34744	133	57.9	21.7	1	1	2093.87	18.67	116.1	1959.1	104.933	2.29706	0.0249261	824.108
1764	22.1	110	9.73	56	17.1	2.01	18.2	4.98	78.1	38	250	71.2	990	224	103.1	84.8	2995	1517	37512	200	125	15.8	1	1	1891.42	197.83	120.39	1573.2	7.95228	1.6	0.0283139	790.599
1765	0	29.4	0	1.44	1.1	0.45	10.2	4.46	82.2	43.2	274	76.5	1016	224	52.4	57	1565	1651	32499	146	69.7	27.1	1	1	1762.95	30.84	98.41	1633.7	52.9734	2.09469	0.0364217	848.862
1766	0.98	5.86	1.29	20.8	62	17.1	294	101	40.8	464	80.1	399	3794	41.89	773	1486	948	516.63	21425	44.5	7.32	49	1	1	5322.82	28.93	514.9	4778.99	165.191	6.07923	1.56751	920.641
1767	0	32.1	0.12	0.59	3.87	1.06	13.4	6.45	111	56.4	363	99.8	1360	300	72.6	74.1	2237	2161	34736	191	94.9	8.87	1	1	2347.79	32.81	135.78	2179.2	66.4188	2.01264	0.0331247	734.602
1768	34.3	5.86	12.5	64.5	39.9	9.05	139	47.7	40.8	250	1191	242	2436	418	276	530	525	7806	21689	32.9	5.81	4.24	1	1	4930.61	117.16	276.45	4537	38.7248	5.66265	1.00952	671.056
1769	0.19	5.86	0.25	10.6	34.4	12.7	175	65.8	40.8	321	1417	276	2607	435	294	546	500	516.63	18384	27.3	6.66	31.5	1	1	5401.6	16.9	328.7	5056	299.172	4.0991	1.092	866.265
1770	0.17	28.5	0.066	0	1.35	0.94	13.2	6.13	109	55.6	361	101	1360	302	74.5	68.5	2424	2164	35819	203	102	18.2	1	1	2338.96	28.736	130.62	2179.6	75.8491	1.9902	0.0282591	805.277
1771	0.52	268	0.025	2.3	14.7	4.41	76.6	29.1	404	172	881	188	1971	355	261	503	457	5615	22332	23.9	4.88	28.6	1	1	4366.65	270.845	528.81	3567	13.1699	4.89754	1.10066	855.032
1772	12.1	5.86	4.3	27.8	27.8	8.99	125	43.8	40.8	258	1312	278	2873	41.89	283	520	430	516.63	21372	23.5	3.56	9.38	1	1	5059.34	50.06	246.39	4762.89	95.1436	6.60112	1.2093	739.765
1773	1.83	262	0.68	10	24.6	7.38	113	43.3	584	237	1185	249	2577	458	262	501	495	7695	22652	24.6	4.31	14	1	1	5752.79	274.51	772.28	4706	17.1433	5.70766	1.01212	778.358
1774	0.3	18.4	0.034	0	0.77	0.27	7.29	3.7	65.5	33.4	232	63.8	891	202	47.9	57	1485	1347	33908	85.9	36.2	13.5	1	1	1518.46	18.734	77.53	1422.2	75.9154	2.37293	0.0383838	774.733
1775	0.33	5.86	0.14	4.05	16	5.03	84.5	32	463	196	1006	218	2280	412	332	653	600	6501	22302	36.2	6.74	22.1	1	1	4722.91	10.38	600.53	4112	396.146	5.37092	1.08833	826.101
1776	0	26.3	0.2	0.53	0	1.06	12.4	5.49	88.5	46.3	290	80.9	1079	244	50.9	75.9	1616	1734	33454	121	58.3	16.9	1	1	1874.68	27.03	107.45	1740.2	64.3803	2.07547	0.0469678	797.535
1777	20	5.86	8.28	54.7	31.6	8.24	120	41.8	548	215	1041	210	2133	380	175	325	366	6665	22271	28.3	5.84	26.5	1	1	4817.48	88.84	749.64	3979	44.7884	4.84589	0.887978	846.317
1778	0.33	35.7	0	2.35	3.55	1.48	13.6	5.83	91.3	46.7	297	84.5	1117	253	91.2	97.7	2420	1771	34809	177	99.1	11	1	1	1952.34	38.38	115.76	1798.2	46.8525	1.78607	0.0403719	754.774
1779	0.71	128	0.45	7.6	19.7	5.54	75.6	26.4	332	124	569	114	1147	201	102	178	175	3776	11448	14.4	2.65	153	1	1	2751	136.76	459.24	2155	15.7575	5.43396	1.01714	1088.05
1780	0.12	43.4	0.14	2.4	3.38	1.27	16.5	7.59	127	65.2	416	114	1487	312	73	78.3	2365	2486	34255	231	119	27.5	1	1	2596	46.06	155.74	2394.2	51.98	1.94118	0.0331078	850.533
1781	0.09	42.7	0.23	0.41	4.17	0.87	11.9	5.62	96.5	48.9	317	87.1	1155	248	68.7	73.6	2001	1884	35005	173	85.5	2.51	1	1	2018.49	43.43	119.06	1856	42.7354	2.02339	0.0367816	630.579
1782	0.095	43.6	0.22	0	0.7	0.78	15.7	7.49	119	58.9	377	103	1380	297	76.7	89.7	2516	2278	35247	216	106	19	1	1	2403.49	43.915	143.67	2215.9	50.4588	2.03774	0.0356518	809.822
1783	0.062	22.5	0	0.4	1.38	0.69	7.79	3.81	61	33.7	223	65.5	924	216	66.1	92	1962	1361	37573	89.7	37	6.77	1	1	1559.83	22.962	74.67	1462.2	63.6791	2.42432	0.0468909	710.374
1784	0.25	39	0	1.61	2.93	1.04	12.4	5.61	93.4	46.4	310	87.7	1195	267	85.6	69.6	2689	1836	37305	202	107	9.64	1	1	2062.34	40.86	115.38	1906.1	46.6495	1.88785	0.0258832	742.31
1785	0.34	33.6	0	0.68	0	0.73	9.16	4.43	83.5	41	282	78.1	1055	237	73.6	61.9	2445	1632	37101	171	84.6	12.3	1	1	1825.54	34.62	97.82	1693.1	48.9053	2.02128	0.025317	765.565
1786	0.32	30.9	0.038	0	0.71	0.86	10.7	5.51	87.1	46	291	81.2	1123	250	69.6	70.5	1993	1747	34135	155	77.7	27.2	1	1	1927.34	31.258	104.88	1791.2	57.3037	1.99485	0.0353738	849.281
1787	0.12	37.9	0	0.72	1.58	0.8	13.7	6.29	98.4	51.7	325	89.7	1234	276	87.3	73.4	2529	1950	36477	185	97.5	13.9	1	1	2135.91	38.74	120.77	1976.4	51.017	1.89744	0.0290233	777.641
1788	0.3	40.8	0.14	1.76	2.63	0.96	10	5.1	80.7	41.3	277	80.8	1098	251	102.8	80.1	3255	1658	38258	207	131	5.91	1	1	1890.49	43	99.39	1748.1	40.6535	1.58015	0.0246083	698.625
1789	0.072	37.4	0	0	1.33	0.9	11.1	4.9	82.9	42.4	284	77.5	1045	232	64.7	63.1	2027	1679	35914	159	88.8	14.8	1	1	1819.5	37.472	101.13	1680.9	44.8575	1.79054	0.0311297	783.947
1790	9.75	5.86	4.21	33.4	35.5	10.2	160	54.6	40.8	255	1157	228	2221	383	264	486	406	7704	22171	21.6	4.67	15.4	1	1	4598.32	53.22	301.1	4244	79.7445	4.62527	1.19704	787.98
1791	0.06	11.7	0.21	2.13	8.19	15.1	41.5	44.6	66.3	75.6	88.3	87.5	112	130	38.3	58	1232	152	10900	0.15	0.025	1.14	1	1	683.19	14.1	175.69	493.4	34.9929	6	0.0470779	575.792
1792	0.06	3.25	0	0.58	1.66	7.48	13.2	10.7	19.3	26.1	28.1	36.5	51.4	70.5	12	6.95	382	55.8	10931	0.078	0.025	0.36	1	1	268.83	3.89	52.34	212.6	54.653	3.12	0.0181937	506.742
1793	2.99	25.5	6.8	8.35	31	40.3	106	116	131	142	149	155	192	229	104	136	3287	289	11548	0.02	0.003	1	1	1	1334.94	43.64	424.3	867	19.8671	6.66667	0.0413751	567.333
1794	3.47	20.6	3.23	3.09	4.97	7.49	26.9	32.7	55.6	78.4	103	138	177	244	27.5	206	1259	167	7340	0.091	0.007	2.27	1	1	898.45	30.39	127.66	740.4	24.3633	13	0.163622	623.213
1795	1.25	52.4	2.16	4.46	28.9	17.9	179	3.45	40.8	16.42	80.1	20.06	4937	41.89	149	1714	245	2432	11158	25.3	14	2.88	1	1	5425.79	60.27	270.05	5095.47	84.5441	1.80714	6.99592	640.856
1796	3.59	18.6	0.88	1.35	14.9	8.59	90.5	193	406	16.42	1386	20.06	3449	41.89	87.9	472	4149	1488	13092	9.23	8.35	8.98	1	1	5650.78	24.42	712.99	4913.37	201.203	1.10539	0.113762	735.736
1797	0.133	28.4	0.842	2.84	16.4	25.1	75.9	160	308	16.42	939	20.06	2129	41.89	18.3	79.8	265	975	8600	2.66	1.04	8.93	1	1	3763.99	32.215	585.4	3146.37	97.6679	2.55769	0.301132	735.222
1798	1.37	23.8	2.79	13.8	55.2	29.6	67	73.9	101	157	213	335	625	41.89	260	52.41	245	381	12159	0.67	0.36	5.99	1	1	1740.35	41.76	326.7	1371.89	32.8518	1.86111	0.213918	699.776
1799	0	3.08	0.036	0.57	2	3	5.97	9.3	10.8	16.7	18.8	26.5	29.9	39.6	13.8	15.1	671	34.5	8371	0.1	0.026	0.29	1	1	166.256	3.686	31.07	131.5	35.6755	3.84615	0.0225037	495.022
1800	2.89	30.9	2.47	10	45.5	40.7	110	143	204	289	398	20.06	812	41.89	159	1615	245	665	11746	0.98	0.68	0.47	1	1	2150.41	46.26	543.2	1560.95	33.743	1.44118	6.59184	521.696
1801	2.42	22.8	1.62	8.43	47.8	62.1	125	138	181	217	262	281	339	406	210	278	245	450	9812	0.5	0.44	2.7	1	1	2094.17	35.27	553.9	1505	42.6708	1.13636	1.13469	636.004
1802	0	3.48	0	0	0.18	0	0	1.07	2.02	3.87	4.55	5.57	8.18	14.7	2.88	10.6	87.7	7.83	9583	0.13	0.021	0.61	1	1	43.62	3.48	3.27	36.87	10.5948	6.19048	0.120867	536.885
1803	0.119	2.32	0.137	0.11	1.87	1.43	1.93	4.07	4.81	8.37	8.04	11.2	11.8	15	2.95	5.74	90.7	14.8	10100	0.052	0.005	0.72	1	1	71.206	2.686	14.11	54.41	20.2569	10.4	0.0632856	546.849
1804	0.167	5.34	0.18	0.4	1.97	2.94	9.2	8.7	11.3	16.4	19.7	23.1	30.9	39.2	4.15	21.6	129	29.7	9380	0.088	0.003	2.11	1	1	169.497	6.087	34.11	129.3	21.242	29.3333	0.167442	617.931
1805	0.042	14.2	0.12	0.73	3.2	6.98	13.4	12.8	17.6	21.4	23.8	23.8	31.8	38	11.2	104	355	41.7	9337	0.14	0.009	0.3	1	1	207.872	15.092	53.98	138.8	9.19693	15.5556	0.292958	496.836
1806	0.149	3.17	0.07	0.34	1.33	2.37	4.04	4.09	6.21	9.31	11.1	11	16.8	22.1	4.46	11.9	124	19.6	10308	0.065	0.006	4.04	1	1	92.079	3.729	18.04	70.31	18.8549	10.8333	0.0959677	667.175
1807	2.61	49.8	2.57	4.22	27.8	28.9	68.3	83.6	100	117	129	149	192	230	20.4	56.7	585	218	7652	0.29	0.034	0.55	1	1	1184.8	59.2	308.6	817	13.8007	8.52941	0.0969231	530.784
1808	0.757	5.18	0.189	0.56	1.59	1.75	8.04	7.42	15.9	21.4	28.3	33.4	43.1	65.6	5.94	21.3	179	44.5	9565	0.12	0.006	2.5	1	1	233.186	6.686	34.7	191.8	28.6868	20	0.118994	630.284
1809	0.021	3.07	0	0.22	2.56	3.46	4.24	7.51	8.16	9.7	14.5	13.7	21	30.1	4.06	11.6	137	25.1	9844	0.041	0.009	0.33	1	1	118.241	3.311	25.93	89	26.8801	4.55556	0.0846715	501.983
1810	0.038	11.9	0.23	0.76	2.89	4.49	12.5	12.1	15.2	19.6	24.9	32.7	35.7	54.1	5.04	72.8	230	40.9	6105	0.054	0.003	0.54	1	1	227.108	12.928	47.18	167	12.9177	18	0.316522	529.713
1811	0.16	3.2	0.095	1.61	2.41	4.8	7.56	8.31	11.5	17.7	22	27.4	40.9	49.8	6.69	29.4	184	37.2	8264	3.95	0.254	1.32	1	1	197.445	5.065	34.58	157.8	31.155	15.5512	0.159783	585.461
1812	0.019	3.26	0.135	0.28	1.7	1.8	3.68	6.5	10.3	12.6	17.2	20.1	28.5	37.1	3.65	7.58	109	28.3	9874	0.12	0	0.12	1	1	143.174	3.694	23.98	115.5	31.2669	0	0.0695413	450.633
1813	0.107	2.73	0	0.13	1.16	0.74	6.48	7.42	8.2	12.1	12.8	14.1	22.1	30	5.32	9.3	127	24.6	9822	0.076	0	0.43	1	1	118.067	2.967	24	91.1	30.7044	0	0.0732283	516.644
1814	0.17	2.33	0	0.19	0.82	1.39	2.3	3.23	6.4	9.69	10.9	11.3	19.3	22.7	2.8	7.47	92.8	18.3	9972	0.065	0.01	3.75	1	1	90.72	2.69	14.14	73.89	27.4684	6.5	0.0804957	661.253
1815	0.038	2.54	0.033	0.2	1.56	2.98	6.5	6.72	12.4	13.1	17.2	16.4	26.8	34.5	3.94	6.52	125	30.8	10067	0.096	0.013	0.27	1	1	140.971	2.811	30.16	108	38.4205	7.38462	0.05216	491.225
1816	0	8.12	0.013	0.34	0.86	0.23	8.52	3.95	59.5	30.3	176	47.2	548	130	81.6	519	3853	1072	11866	5.87	2.11	1.53	1	1	1013.03	8.473	73.06	931.5	109.937	2.78199	0.1347	595.423
1817	0.094	22.5	0.02	0.71	1.49	0.17	9.45	4.19	52.3	20.4	97	19.7	190	37.3	191	260	394	619	10888	3.5	1.47	8.64	1	1	455.324	23.324	67.6	364.4	15.6234	2.38095	0.659898	732.194
1818	0.016	2.85	0.003	0.88	3.03	0.67	19.9	8.16	112	50.2	274	69.5	765	168	55.8	112	2736	1662	10632	3.62	2.04	1.81	1	1	1474.21	3.749	143.76	1326.7	353.881	1.77451	0.0409357	607.048
1819	0.026	8.78	0.01	0.13	0.82	0.2	7.19	3.5	54.6	27.7	164	46.1	566	148	99.3	602	4639	1021	11574	3.34	0.99	1.6	1	1	1027.06	8.946	66.31	951.8	106.394	3.37374	0.129769	598.487
1820	0.082	2.55	0.026	0.022	0.36	0.16	2.66	0.94	15.4	7.5	40.1	10.1	124	31.7	14.4	25	715	250	9320	0.49	0.27	2.15	1	1	235.6	2.68	19.52	213.4	79.6269	1.81481	0.034965	619.282
1821	0.011	3.42	0.02	0.55	0.87	0.33	10.3	4.63	73.3	36.6	217	58.4	686	157	116	172	5601	1310	9668	6.17	2.85	7.21	1	1	1248.43	4.001	89.43	1155	288.678	2.16491	0.0307088	715.916
1822	0.031	1.19	0.019	0.091	0.26	0.12	5.37	2.45	41.6	20.7	120	32.7	382	89.4	24.1	30	1177	707	10717	2.84	1.92	2.01	1	1	695.931	1.331	49.8	644.8	484.448	1.47917	0.0254885	614.456
1823	0.063	11.1	0.032	0.48	2.73	0.21	18.4	6.94	86.2	32.8	146	29.7	273	51.4	166	225	409	975	10597	2.58	1.95	5.29	1	1	659.055	11.675	114.48	532.9	45.6445	1.32308	0.550122	689.247
1824	0.254	10.3	0.127	1.18	0.73	0.32	6.06	2.79	43.5	23.8	153	45	612	172	137	384	245	918	14112	4.5	1.85	1.81	1	1	1071.06	11.861	53.4	1005.8	84.7989	2.43243	1.56735	607.048
1825	0	11	0	0.42	2.66	0.47	15.1	5.53	69.6	28.5	137	29.4	292	58.7	220	146	442	862	8608	2.13	1.6	7.05	1	1	650.38	11.42	93.36	545.6	47.7758	1.33125	0.330317	713.933
1826	0.002	7.94	0.006	0.43	0.81	0.12	8.54	3.74	59.6	29.1	174	46.4	555	132	71.6	367	3369	1042	10838	8.23	4.75	3.4	1	1	1017.69	8.378	72.81	936.5	111.781	1.73263	0.108934	653.577
1827	0.089	8.08	0.073	0.48	0.43	0.2	3.84	1.82	27.7	13.9	82.6	22	277	71	72.7	426	3327	502	11706	1.84	0.73	2.82	1	1	509.212	8.722	33.99	466.5	53.4854	2.52055	0.128043	639.267
1828	0.032	15.8	0.026	0.55	2.84	0.23	21.06	8.32	110.2	44.6	216	46.6	436	85.7	409	356	697	1097	10891	5.91	2.93	9	1	1	987.958	16.408	142.65	828.9	50.518	2.01706	0.51076	735.941
1829	0.029	6.84	0.029	0.13	0.38	0.13	5.24	2.2	30.5	13.5	67.2	15.8	158	32.2	177	104	434	436	11439	2.83	2.34	25.79	1	1	332.178	7.028	38.45	286.7	40.794	1.2094	0.239631	843.246
1830	0	8.96	0.038	0.15	0.41	0.24	7.79	3.91	59.3	29.7	178	48.2	573	137	89	530	4196	1085	11478	6.72	3.19	1.64	1	1	1046.7	9.148	71.65	965.9	105.586	2.10658	0.126311	600.188
1831	0.061	8.36	0.105	1.09	0.7	0.16	3.53	1.28	17.9	8.1	44.1	11.2	130	28.3	255	103	547	285	11140	1.39	1.69	15.03	1	1	254.886	9.616	23.57	221.7	23.0553	0.822485	0.1883	785.508
1832	0.081	10.6	0.044	0.25	1.03	0.28	5.91	2.21	31.1	11.8	56.5	12.3	123	24.2	148	119	335	365	9443	1.85	0.84	7.56	1	1	279.305	10.975	40.53	227.8	20.7563	2.20238	0.355224	720.129
1833	0	1.04	0	0	0.42	0.15	4.77	2.36	42.9	23.2	152	46.3	584	145	65.8	29.8	3234	929	9281	2.66	1.54	0.79	1	1	1002.14	1.04	50.6	950.5	913.942	1.72727	0.00921459	552.532
1834	0	2.18	0	0.16	0.81	0.15	4.04	1.95	31.2	14.1	79.9	19.8	232	52.1	33.5	57.3	1653	479	10461	2.6	1.38	4.36	1	1	438.39	2.34	38.15	397.9	170.043	1.88406	0.0346642	673.313
1835	0	1.36	0.01	0.13	0.66	0.16	5.01	2.74	39.5	15.3	80.9	29.1	311	77.3	13.9	60.2	1677	484	11601	2.45	1.63	0.68	1	1	563.17	1.5	48.07	513.6	342.4	1.50307	0.0358974	543.386
1836	0.002	8.92	0.036	0.12	0.69	0.22	6.13	3.45	51.7	25.1	152	43.3	522	120	84.7	448	3832	942	10523	6.4	2.64	0.69	1	1	933.668	9.078	62.19	862.4	94.9989	2.42424	0.11691	544.268
1837	0.029	10.4	0.022	0	0.83	0.28	6.67	3.14	45	21.9	126	35.2	428	109	107	914	4960	807	11376	2.75	1.3	2.46	1	1	786.471	10.451	55.92	720.1	68.9025	2.11538	0.184274	629.095
1838	0.012	8.78	0	0.21	1.4	0.25	9.92	4.05	62.5	31.2	179	48	557	134	93.8	603	4370	1106	10773	5.37	2.47	2.07	1	1	1036.32	9.002	78.12	949.2	105.443	2.17409	0.137986	616.558
1839	0.093	1.04	0.009	0.16	0.36	0.15	4.92	2.62	42.9	21.7	132	37.3	473	113	55.4	31	2687	843	10395	2.82	1.62	2.36	1	1	829.252	1.302	50.95	777	596.774	1.74074	0.011537	626.048
1840	0.01	2.24	0	0.3	0.47	0.35	8.42	3.85	65.8	34.7	218	63.5	776	185	116	55.9	5514	1364	10423	10	5.23	2.5	1	1	1358.64	2.55	78.89	1277.2	500.863	1.91205	0.0101378	630.284
1841	0.037	2.4	0.002	0.053	0.236	0.059	1.18	0.71	11.2	6	36.5	10.2	131	34.2	35.7	66.5	1746	211	17113	1.52	1.2	0.74	1	1	233.777	2.492	13.385	217.9	87.4398	1.26667	0.0380871	548.519
1842	0.11	7	0.037	0.515	0.646	0.24	5.72	3.06	46.3	22.7	136	38.1	460	118	128	307	245	821	16243	4.01	1.67	6.29	1	1	838.428	7.662	55.966	774.8	101.122	2.4012	1.25306	703.979
1843	0.017	13.5	0.018	0.756	1.28	0.454	12.34	5.45	76.2	35.7	198	53.2	613	154	234.6	1062	245	1260	14382	6.92	4.24	1.29	1	1	1163.91	14.291	95.724	1053.9	73.7457	1.63208	4.33469	583.93
1844	0	3.17	0.003	0.014	0.255	0.106	2.56	1.13	17.4	9.4	56.7	15.5	187	47.3	27.7	134	1373	334	13491	2.01	1.75	0.33	1	1	340.538	3.187	21.451	315.9	99.1214	1.14857	0.0975965	501.983
1845	0.373	14	0.369	1.65	1.19	0.39	8.73	3.55	52.2	24.1	140	37.4	454	118	151.1	822	245	858	12360	2.48	1.28	3.1	1	1	855.952	16.392	66.06	773.5	47.1877	1.9375	3.3551	646.454
1846	0	6.57	0	0.276	0.663	0.211	5.39	2.56	35.4	16.1	90.2	24.5	284	69.2	67.5	464	3188	578	12215	3.02	2.12	1.55	1	1	535.07	6.846	44.224	484	70.6982	1.42453	0.145546	596.31
1847	0	6.33	0.025	0.529	1.6	0.289	11.4	4.52	63	28.7	161	42.9	498	123	75.1	514	3565	1002	11536	3.61	2.84	1.28	1	1	941.293	6.884	80.809	853.6	123.998	1.27113	0.14418	583.413
1848	0.025	10.1	0.027	0.168	0.932	0.356	6.46	3.03	45.1	21.3	117	30.9	358	87.2	72.2	536	3396	764	12229	3.8	2.48	1.97	1	1	680.598	10.32	55.878	614.4	59.5349	1.53226	0.157833	613.026
1849	0.406	11.6	0.33	1.55	1.72	0.489	7.28	3.13	43.7	19.5	111	30	366	93.3	104	704	4903	712	12409	2.82	1.4	14.6	1	1	690.005	13.886	56.319	619.8	44.6349	2.01429	0.143586	782.573
1850	0.042	15.7	0.041	0.579	1.23	0.461	13.7	5.79	81.6	36.9	210	56.9	658	164	261	1208	245	1330	15905	7.67	6.61	2.15	1	1	1244.94	16.362	102.781	1125.8	68.8058	1.16036	4.93061	619.282
1851	0.02	8.21	0.036	0.342	1.34	0.344	10.9	4	62	28.3	161	42.9	505	120	87.5	558	3950	1015	12224	5.28	2.41	7.17	1	1	944.392	8.608	78.584	857.2	99.5818	2.19087	0.141266	715.424
1852	0.023	11.5	0.043	0.72	1.26	0.324	9.07	3.76	54.8	25.8	147	40.3	463	116	12	791.6	5481	905	12293	5.35	3.12	7.32	1	1	873.6	12.286	69.214	792.1	64.4718	1.71474	0.144426	717.258
1853	0.076	9.16	0.036	0.096	0.7	0.33	7.74	3.29	51.9	25.4	149	41	488	121	83.9	474.7	3913	912	12674	4.87	2.43	2.24	1	1	897.728	9.368	63.96	824.4	88.0017	2.00412	0.121314	622.247
1854	0.044	9.48	0.047	0.972	1.49	0.597	14.7	5.63	76.9	34.9	192	52	611	148	95.8	637.1	4396	1208	12397	4.01	2.72	4.45	1	1	1147.76	10.543	99.317	1037.9	98.4445	1.47426	0.144927	674.972
1855	0.026	9.82	0.084	1.374	3.55	0.373	19.1	5.81	67.5	23.8	104	22.6	211	39.2	50.8	67.2	106	712	10067	1.93	0.82	3.87	1	1	508.237	11.304	96.333	400.6	35.4388	2.35366	0.633962	663.748
1856	0.036	13.7	0.098	1.486	2.32	0.253	13.9	4.22	53	18.8	87.1	18.7	182	33.2	49.1	71.7	119	570	10116	2.85	0.92	3.15	1	1	428.813	15.32	73.693	339.8	22.1802	3.09783	0.602521	647.68
1857	0.005	10.3	0.06	0.626	0.87	0.38	7.8	3.58	54.6	26.5	157	43.2	534	134	97	472.7	4365	952	12680	5.63	3.42	5.64	1	1	972.921	10.991	67.23	894.7	81.403	1.6462	0.108293	694.646
1858	0.014	7.93	0.029	0.385	1.75	0.565	11.7	4.35	64.7	29.8	163	43	497	119	69.8	535.1	3243	1024	12540	2.8	1.82	1.56	1	1	943.223	8.358	83.065	851.8	101.914	1.53846	0.165002	596.75
1859	0	9.42	0.011	0.389	1.13	0.424	8.75	3.83	57.8	28.4	169	48.1	595	152	86.9	490.9	4065	1016	12438	5.9	4.14	2.11	1	1	1074.25	9.82	71.934	992.5	101.069	1.42512	0.120763	617.931
1860	0.007	9.68	0.123	1.812	3.46	0.764	22.9	8.97	125	54.6	294	72.8	800	184	93.3	889.9	4285	1863	10883	3.35	2.28	1.77	1	1	1578.12	11.622	161.094	1405.4	120.926	1.4693	0.207678	605.484
1861	0.261	11.1	0.107	1.016	3.13	0.127	16.6	6.24	75.8	28.7	133	28.4	266	51	203	179.3	529	894	11776	3.31	1.07	8.36	1	1	621.481	12.484	101.897	507.1	40.62	3.09346	0.338941	729.19
1862	0.008	9.16	0.035	0.291	1.05	0.043	8.11	2.72	35	12.3	53.6	10.8	94.9	17.4	29.8	74.5	66.4	379	10440	3.53	1.19	4.33	1	1	245.417	9.494	46.923	189	19.9073	2.96639	1.12199	672.754
1863	0	7	0.019	0.04	0.7	0.296	6.97	2.88	47.8	22.3	130	35.6	421	104	68.8	401	3242	796	12241	3.98	2.01	1.225	1	1	778.605	7.059	58.646	712.9	100.992	1.9801	0.123689	580.508
1864	0.145	16.9	0.097	0.977	2.26	0.438	16.72	6.41	92.9	41.3	222	56.5	631	145	165.3	1730.6	245	1424	10834	7.6	3.72	3.71	1	1	1232.65	18.119	118.728	1095.8	60.478	2.04301	7.06367	660.407
1865	0.005	6.68	0.023	0.119	1.13	0.195	7.05	2.3	26.5	10.3	49.1	11	108	22.3	66.2	60.1	138	320	9784	1.14	0.4	4.35	1	1	244.702	6.827	37.175	200.7	29.398	2.85	0.435507	673.127
1866	0.002	5.33	0.017	0.256	0.52	0.124	4.92	2.33	34.9	17.3	102	27.5	325	80.4	49.5	255.3	2380	615	12264	3.67	1.77	1.31	1	1	600.599	5.605	42.794	552.2	98.5192	2.07345	0.107269	584.954
1867	0.017	8.32	0.005	0.233	0.64	0.233	7.5	3.28	50.3	24.6	140	37.5	443	108	85.5	474.5	4001	846	12985	3.83	1.66	1.95	1	1	823.628	8.575	61.953	753.1	87.8251	2.30723	0.118595	612.301
1868	0.229	12	0.146	0.918	1.14	0.44	7.65	3.34	47.9	22.1	126	33.4	387	95.8	105.2	703.1	4892	784	12681	3.86	2.34	1.55	1	1	738.063	13.293	60.47	664.3	49.9737	1.64957	0.143724	596.31
1869	0.067	48.4	0.212	4.03	9.57	1.11	64.6	24.7	308	117	493	99	862	137	44.9	214	308	3062	7508	12.4	2.82	7.14	1	0.5	2168.69	52.709	407.98	1708	32.4043	4.39716	0.694805	780.343
1870	0	60.1	0.301	5.21	12.9	0.886	78.4	29	366	140	600	122	1098	178	62.8	323	474	3593	7717	18.3	4.65	6.82	1	0.5	2690.8	65.611	487.186	2138	32.586	3.93548	0.681435	775.758
1871	0	28.1	0.132	2.31	4.68	0.442	34.5	12.6	164	63.8	276	58	534	91.2	25.3	104	179	1588	9118	4.89	1.58	3.01	1	0.5	1269.76	30.542	216.222	1023	33.4949	3.09494	0.581006	700.204
1872	1.5	25	0.704	5.17	5.37	0.783	24.2	8.74	107	40.9	182	40.6	389	67.9	16.3	71.4	121	1025	8073	3.35	1.11	4.04	1	0.5	898.867	32.374	146.093	720.4	22.2524	3.01802	0.590083	726.103
1873	0	66	0.152	4.08	10.6	1.23	74.3	27.7	354	132	556	114	999	151	73.3	340	477	3137	7293	18.2	4.66	6.11	1	0.5	2490.06	70.232	467.83	1952	27.7936	3.90558	0.712788	764.928
1874	0.186	44.7	0.323	5.01	11.5	1.05	68.8	26.1	343	133	572	124	1148	175	65.9	312	601	3073	7960	15.7	3.44	10.9	1	0.5	2652.67	50.219	450.45	2152	42.8523	4.56395	0.519135	824.609
1875	0.065	38.4	0.12	1.8	5.78	0.133	37.2	15.6	214	86.1	398	92.9	907	144	92.4	426	621	2094	11619	14	5.2	3.75	1	0.5	1941.1	40.385	272.713	1628	40.312	2.69231	0.68599	719.418
1876	0	12.2	0.028	0.321	0.446	0.231	8.07	2.81	40.4	17.2	88.4	21	231	51.4	16.3	39.2	246	535	11040	7.07	4.45	3.15	1	0.5	473.506	12.549	51.957	409	32.5922	1.58876	0.15935	704.116
1877	0.059	23.2	0.081	1.41	3.31	0.323	23.8	8.21	104	41.5	191	41.2	393	73.3	16.9	83.9	217	1209	10125	8.39	3.08	7.3	1	0.5	904.393	24.75	139.643	740	29.899	2.72403	0.386636	782.573
[truncated: 415 more rows]
