# Supplementary material for: New machine learning models on reevaluation of the Ti-in-zircon thermometer via multivariate trace elements
Source: Royal Society of Chemistry journal article supplement (doi:10.1039/d4ja00352g), 2024-11-20
Supplement: d4ja00352g1.zip [file TableS3.lowT_876.xlsx]

## Sheet: lowT_886
entry_id	la_ppm	ce_ppm	pr_ppm	nd_ppm	sm_ppm	eu_ppm	gd_ppm	tb_ppm	dy_ppm	ho_ppm	er_ppm	tm_ppm	yb_ppm	lu_ppm	pb_ppm	th_ppm	u_ppm	y_ppm	hf_ppm	nb_ppm	ta_ppm	ti_ppm	α(SiO2)	α(TiO2)	REE	LREE	MREE	HREE	HREE/LREE	Nb/Ta	Th/U	T(℃)
1	2.47	26.5	4.34	30.3	8.59	11.8	18	3.56	44.5	18.6	95.2	21.5	224	53.9	493	39.8	10	701	17400	0.63	0.3	5.48	1	1	563.26	63.61	86.45	413.2	6.49583	2.1	3.98	692.214
2	0	0.2	0.03	0.14	0.23	0.26	2.8	1.58	28.4	14.8	79.7	18.9	203	49.2	406	25.8	0.18	523	19267	0.47	0.3	1.76	1	1	399.24	0.37	33.27	365.6	988.108	1.56667	143.333	605.088
3	0.42	4.13	0.81	5.67	4.52	1.52	9.08	2.59	32.9	15.9	87.8	21.4	229	54.4	131	10.9	2.89	559	17283	0.78	0.29	2.51	1	1	470.14	11.03	50.61	408.5	37.0354	2.68966	3.77163	630.579
4	0	0.003	0.02	0	0.07	0.11	2.31	1.87	53.5	40	285	78.3	879	207	492	30.8	0.11	1571	27156	3.24	1.86	5.08	1	1	1547.18	0.023	57.86	1489.3	64752.2	1.74194	280	685.865
5	6.19	38.8	5.66	36.5	18	23.4	38	7.88	71.7	21.9	72.6	12.1	107	20.4	34.03	78	8.42	753	17283	1.56	0.71	2.77	1	1	480.13	87.15	158.98	234	2.68503	2.19718	9.26366	637.922
6	0.4	2.42	0.53	2.54	0.84	0.72	3.57	1.36	32.2	22.7	150	38.6	412	93.7	433	34.8	8.37	868	19273	5	1.8	4.37	1	1	761.58	5.89	38.69	717	121.732	2.77778	4.15771	673.499
7	1.03	6.43	3.3	13.2	3.04	1.81	9.1	1.56	22.2	11.5	67.1	17.7	199	50.3	186	49.9	42.8	420	16945	0.65	0.31	5.26	1	1	407.27	23.96	37.71	345.6	14.424	2.09677	1.16589	688.771
8	9.23	8.37	1.58	8.42	2.04	2.6	5.93	2.12	31.9	15.3	73.1	16.4	164	35.9	34.03	101	37.6	527	21019	1.52	0.74	5.59	1	1	376.89	27.6	44.59	304.7	11.0399	2.05405	2.68617	693.892
9	0	0.16	0.004	0.15	0.54	0.75	7.64	2.65	24.2	6.7	27.5	5.27	63.5	12.2	12.4	1.01	194	254	12866	0.21	0.06	1.56	1	1	151.264	0.314	35.78	115.17	366.783	3.5	0.00520619	596.75
10	0.15	2.15	0.32	2.61	1.69	1.1	4.83	1.49	19.3	6.82	34	7.23	85.9	16.8	49.3	68.8	770	274	12904	0.9	0.38	2.66	1	1	184.39	5.23	28.41	150.75	28.8241	2.36842	0.0893506	634.889
11	0	0.19	0.001	0.14	0.68	0.73	7.62	2.65	24.7	6.84	30.3	6.07	71.9	14.3	14.1	1.13	211	266	12426	0.29	0.07	2.43	1	1	166.121	0.331	36.38	129.41	390.967	4.14286	0.00535545	628.192
12	1.21	9.04	1.32	9.19	4.57	5.01	8.96	1.85	17.1	5.19	23.1	4.53	54.9	10.9	52.3	42.8	804	222	14471	0.87	0.5	3.52	1	1	156.87	20.76	37.49	98.62	4.75048	1.74	0.0532338	656.28
13	0	0.13	0.003	0.09	0.21	0.26	2.39	0.82	8.37	2.7	12.6	2.7	33.1	6.43	25.7	1.35	411	107	13370	0.43	0.25	3.14	1	1	69.803	0.223	12.05	57.53	257.982	1.72	0.00328467	647.436
14	0.003	0.12	0.002	0.14	0.25	0.25	3.5	1.41	13	2.67	7.81	1.03	8.86	1.29	7.91	1.33	124	98.5	13474	0.31	0.1	2.28	1	1	40.335	0.265	18.41	21.66	81.7358	3.1	0.0107258	623.533
15	0.004	1.05	0.047	1.04	3.05	0.12	24	10.4	150	61	306	63.5	698	116	93.4	65.6	521	1962	13599	1.02	0.74	5.45	1	1	1434.21	2.141	187.57	1244.5	581.27	1.37838	0.125912	691.751
16	0.092	0.74	0.07	0.62	1.27	1.15	10.1	2.51	17.8	4.07	14.2	2.31	21.5	3.47	23.5	6.19	373	151	12121	0.23	0.05	2.46	1	1	79.902	1.522	32.83	45.55	29.9277	4.6	0.0165952	629.095
17	0.016	0.42	0.035	0.36	0.44	0.64	5.31	2.43	34.9	13.3	69.2	15	182	36.8	42	2.93	641	530	13185	0.71	0.3	2.89	1	1	360.851	0.831	43.72	316.3	380.626	2.36667	0.00457098	641.118
18	0.038	0.27	0.015	0.23	0.31	0.33	3.54	1.53	19	6.97	34.3	7.33	88.5	18	21.2	2.05	257	265	13174	0.28	0.11	4.3	1	1	180.363	0.553	24.71	155.1	280.47	2.54545	0.00797665	672.191
19	0.004	0.16	0.003	0.15	0.43	0.46	5.4	2.17	19.9	4.39	13.8	2.17	20.9	3.47	8.31	1.45	128	157	12929	0.45	0.11	2.05	1	1	73.407	0.317	28.36	44.73	141.104	4.09091	0.0113281	615.863
20	0.09	0.33	0.029	0	0	0.027	0.39	0.27	4.41	2.72	18.5	5.19	64.2	17.5	12.8	0.53	144	91.1	13218	0.24	0.17	1.28	1	1	113.656	0.449	5.097	108.11	240.78	1.41176	0.00368056	583.413
21	0	0.001	0	0.105	0	0	0.049	0.08	2.52	2.11	19.2	6.85	88.6	25.8	3.74	0	45.7	88.3	13417	0.37	0.19	0.11	1	1	145.315	0.106	2.649	142.56	1344.91	1.94737	0	446.533
22	0	0	0	0	0.089	0.024	0	0.15	4.83	3.35	27.7	8.66	105	28.7	14.6	0.02	172	133	12897	0.71	0.32	2.38	1	1	178.503	0	5.093	173.41	0	2.21875	0.000116279	626.666
23	0	0.03	0	0	0.089	0.008	0.51	0.44	11.4	8.73	70.1	23.8	312	81.9	8.43	0.03	107	320	22493	3.7	1.75	4.61	1	1	509.007	0.03	12.447	496.53	16551	2.11429	0.000280374	677.854
24	0.052	0.344	0.006	0.43	0.34	0.022	1.58	0.92	15.3	7.22	40.2	10	114	29.6	28.3	10.7	353	250	11769	0.55	0.26	1.44	1	1	220.014	0.832	18.162	201.02	241.611	2.11538	0.0303116	591.304
25	0	0.17	0	0.14	0.25	0.011	0.49	0.44	7.82	5.49	35.9	10.1	128	34.2	13.8	0.46	171	196	12887	0.38	0.14	3	1	1	223.011	0.31	9.011	213.69	689.323	2.71429	0.00269006	643.952
26	0.011	0.1	0.019	0.11	0.18	0.11	0.85	0.36	7.02	4.44	35.2	11.6	171	36.8	9.23	0.31	123	181	17600	1.73	0.79	3.4	1	1	267.8	0.24	8.52	259.04	1079.33	2.18987	0.00252033	653.577
27	0	0.058	0.013	0	0.11	0.04	0.46	0.16	3.74	1.9	13	3.68	47.9	10.4	14.6	0.42	207	79.9	12599	0.29	0.16	1.16	1	1	81.461	0.071	4.51	76.88	1082.82	1.8125	0.00202899	576.928
28	0.008	0.031	0.01	0.058	0.042	0.027	0.54	0.57	16.5	12.6	110	37.8	554	116	8.89	0.24	113	541	16910	2.18	0.87	5.37	1	1	848.186	0.107	17.679	830.4	7760.75	2.50575	0.00212389	690.507
29	0.017	0.029	0.005	0	0.048	0.018	0.13	0.04	1.3	0.89	7.18	2.5	38.5	8.57	1	0.01	8.68	35.7	13157	0.19	0.06	1.17	1	1	59.227	0.051	1.536	57.64	1130.2	3.16667	0.00115207	577.489
30	0.003	0.001	0.001	0.004	0	0.007	0.14	0.07	1.78	1.33	10.4	3.36	48.8	10.3	6.9	0.07	95.2	56.4	12530	0.39	0.23	1.01	1	1	76.196	0.009	1.997	74.19	8243.33	1.69565	0.000735294	567.97
31	0	0.01	0.01	0.001	0.038	0.004	0.07	0.04	1.98	1.89	18.6	7.4	114	25.5	2.11	0.01	27.7	82.4	12696	0.5	0.24	1.35	1	1	169.543	0.021	2.132	167.39	7970.95	2.08333	0.000361011	586.962
32	0.002	0.022	0	0.02	0.041	0.013	0.24	0.16	3.99	2.29	14.8	4.54	62.7	13.3	6.17	0.1	89.1	89.8	11892	0.31	0.09	0.99	1	1	102.118	0.044	4.444	97.63	2218.86	3.44444	0.00112233	566.691
33	0	0	0.001	0	0.006	0	0.06	0.05	2.33	2.19	21.2	7.76	117	25.7	3.26	0.02	41.5	95.7	13047	0.73	0.35	1.68	1	1	176.297	0.001	2.446	173.85	173850	2.08571	0.000481928	601.854
34	0.034	0.27	0.039	0.31	0.15	0.082	0.5	0.22	3.84	2.54	18.6	5.92	82.6	18.2	7.67	0.69	95.5	105	12153	0.34	0.15	1.33	1	1	133.305	0.653	4.792	127.86	195.804	2.26667	0.00722513	585.964
35	0.005	0.037	0	0.03	0.001	0.003	0.25	0.13	4.5	3.27	28.5	9.99	148	32.1	5.23	0.15	66.8	144	16632	1.9	0.91	2.94	1	1	226.816	0.072	4.884	221.86	3081.39	2.08791	0.00224551	642.417
36	0	0	0.006	0	0.03	0.021	0.21	0.1	2.95	2.5	21.2	7.09	100	22	7.3	0.07	99.1	105	12318	0.39	0.23	1.21	1	1	156.107	0.006	3.311	152.79	25465	1.69565	0.000706357	579.696
37	0.004	0	0	0	0	0.009	0	0.1	2.88	2.71	28	11.1	187	44.6	1.21	0.06	7.97	121	13977	0.34	0.11	1.41	1	1	276.403	0.004	2.989	273.41	68352.5	3.09091	0.00752823	589.883
38	0	0.03	0.02	0.35	0	0.068	0	0.14	2.6	1.49	10.2	3.07	35.9	8.84	17.4	0.24	222	55.5	23678	0.67	0.72	1.71	1	1	62.708	0.4	2.808	59.5	148.75	0.930556	0.00108108	603.082
39	0.063	0.02	0.04	0	0.14	0.032	0.85	0.47	9.52	5.51	33.9	9.43	109	28	17.4	0.13	220	189	12981	0.44	0.29	3.24	1	1	196.975	0.123	11.012	185.84	1510.89	1.51724	0.000590909	649.846
40	0	0.09	0.04	0.22	0.23	0.012	0.4	0.19	3.52	1.81	11.8	3.6	42.8	11.2	8.42	0.22	99.4	65.2	17880	0.53	0.28	5.13	1	1	75.912	0.35	4.352	71.21	203.457	1.89286	0.00221328	686.681
41	0	0.16	0	0.33	0.56	0.084	1.9	1.25	21.8	12.2	76.1	21.1	238	59.7	26.8	0.5	331	438	12712	0.95	0.36	4.31	1	1	433.184	0.49	25.594	407.1	830.816	2.63889	0.00151057	672.379
42	0.066	0.09	0.01	0	0	0.19	1.7	1.36	25.2	13	75	18.7	220	56.3	27.4	0.36	344	446	12518	0.56	0.24	2.9	1	1	411.616	0.166	28.45	383	2307.23	2.33333	0.00104651	641.379
43	0.063	0.08	0.02	0.05	0.33	0.24	3.4	1.87	31.3	15.9	88.6	22.1	243	61.6	45.6	0.67	572	552	12138	0.79	0.38	2.15	1	1	468.553	0.213	37.14	431.2	2024.41	2.07895	0.00117133	619.282
44	0.099	0.4	0.06	0.77	0.62	1.19	1.9	0.93	14.3	7.01	38.3	9.37	105	25.5	56.5	0.97	702	243	13721	1.29	0.59	3.7	1	1	205.449	1.329	18.94	185.18	139.338	2.18644	0.00138177	660.194
45	0.018	0.14	0	0.66	0	0.11	0.33	0.4	8.45	4.81	30.7	8.32	95.5	24	18.3	0.37	164	173	17085	0.62	0.3	5.01	1	1	173.438	0.818	9.29	163.33	199.67	2.06667	0.0022561	684.712
46	0.016	0.28	0.045	0.71	0	0.11	1.58	0.61	9.46	4.68	25	5.68	57.3	12.4	2.78	0.24	33.8	164	11480	0.15	0.01	1.61	1	1	117.871	1.051	11.76	105.06	99.9619	15	0.00710059	598.915
47	0.063	0.065	0.029	0.26	0.07	0.066	0.94	0.4	6.04	2.86	15.3	3.46	36.5	8.21	5.28	0.14	65.1	104	12019	0.15	0.05	2.08	1	1	74.263	0.417	7.516	66.33	159.065	3	0.00215054	616.903
48	0.008	0.05	0	0	0.035	0.083	1.05	0.54	7.92	3.88	21.3	4.97	49.1	10.8	10.5	0.29	135	139	13119	0.14	0.08	1.22	1	1	99.736	0.058	9.628	90.05	1552.59	1.75	0.00214815	580.238
49	4.33	8.21	1.1	6.82	2.34	1.24	6.13	2.57	34.4	16.8	96.4	24.7	286	77.7	99.9	4.22	1244	611	13975	1.04	0.32	3.85	1	1	568.74	20.46	46.68	501.6	24.5161	3.25	0.00339228	663.337
50	3.94	10.6	2.03	14.8	5.92	1.59	14.8	4.28	55.9	24.7	132	30.6	326	76.3	92.6	10.2	1121	838	13926	1.34	0.46	1.13	1	1	703.46	31.37	82.49	589.6	18.795	2.91304	0.00909902	575.218
51	1.35	4.02	0.67	3.06	1.27	0.62	3.12	0.84	9.59	3.74	17.7	4.12	43.4	10.8	17.8	3.71	106	121	12143	0.23	0.05	2.18	1	1	104.3	9.1	15.44	79.76	8.76484	4.6	0.035	620.282
52	0	0	0.00730985	0.0645837	0.0350213	0	0	0.00533847	0.0107477	0.00558812	0	0.00259638	0	0	0.0620328	0	0.0127825	0.0155027	0.0102398	0.0331807	0.00636792	1.53031	0.5	0.5	0.131186	0.0718936	0.0511075	0.0081845	0.113842	5.2106	0	595.436
53	0.00621782	0	0.00253681	0	0.0181816	0.0150033	0	0.00765151	0.0334636	0.00289871	0.00823731	0.00538605	0.0344555	0.00293306	0.079911	0	0.00998114	0.00676036	0	0.0412779	0	0.417093	0.5	0.5	0.136965	0.00875463	0.0743	0.0539106	6.15796	0	0	514.928
54	0	0.00244969	0	0.0473609	0.0191535	0.00400084	0	0.00585984	0.0117402	0.006097	0.0086681	0.00283092	0	0.00614448	0.0607963	0	0	0.00893895	0	0.00634873	0.00688494	0.953035	0.5	0.5	0.114305	0.0498106	0.0407544	0.0237405	0.476616	0.922119	0	564.27
55	0.00326785	0.0032161	0	0	0	0	0.0598521	0	0.0117072	0.00304076	0.0171731	0	0.0545696	0.0215483	0.0711648	0	0.00350068	0.0311332	0.00842313	0.0544349	0.00690507	0.742629	0.5	0.5	0.174375	0.00648395	0.0715593	0.0963316	14.8569	7.88332	0	548.736
56	0	0.0157315	0	0	0	0.0127454	0.0718342	0	0	0.00287081	0.0104266	0	0	0.110798	0.104376	0.00445748	0	0.0260088	0.0134072	0.0089483	0.0125663	1.00953	0.5	0.5	0.224407	0.0157315	0.0845796	0.124096	7.88834	0.712089	0	567.94
57	0.0035824	0	0.00590789	0	0	0.0230694	0.0217426	0	0.0129478	0	0.0189255	0	0.0161574	0.0101003	0.0127996	0	0	0.00785009	0.0121484	0.00810496	0	0.948667	0.5	0.5	0.112433	0.00949029	0.0577599	0.0451831	4.76099	0	0	563.979
58	0	0	0.0029759	0	0	0	0	0.00965413	0	0	0	0.00628498	0.0401466	0.0135365	0.0237716	0.00405493	0	0.0394788	0	0.0122339	0	2.07605	0.5	0.5	0.0725981	0.0029759	0.00965413	0.0599681	20.1513	0	0	616.767
59	0.00336177	0.00230333	0	0	0.0198462	0	0.020499	0.00899591	0.0487609	0.00313154	0.0267137	0.00586337	0.0937537	0.00216831	0.00275996	0.00636785	0	0.0110089	0.0341842	0.0189634	0.0035492	4.38583	0.5	0.5	0.235398	0.0056651	0.0981019	0.131631	23.2354	5.343	0	673.792
60	0.0369486	0.0297127	0.0442946	0	0.0611407	0.0496699	0	0.025894	0	0.00396056	0	0.0036798	0	0.00255191	1.26645	0.0013132	0.667451	0	0.029017	0.00940209	0	0.569776	0.5	0.5	0.257853	0.110956	0.136705	0.0101923	0.0918587	0	0.00196748	532.855
61	0.0849597	0.0466177	0.0539971	0	0.0671837	0	0.00749833	0.0568753	0	0	0	0	0.103257	0.00438585	0.561969	0.00941234	2.99914	0	0	0.298651	0	1.25393	0.5	0.5	0.424775	0.185574	0.131557	0.107643	0.580053	0	0.00313834	582.049
62	0.0176637	0.0353359	0	0	0.0391935	0.0158605	0	0.0331615	0.00242523	0	0.0126179	0.00234505	0.0300705	0.00192916	0.293317	0.0030557	0.133408	0.00972324	0.00923769	0.197523	0.0114174	1.42634	0.5	0.5	0.190603	0.0529996	0.0906407	0.0469626	0.886093	17.3001	0.0229048	590.66
63	0.0330308	0.00914988	0.00901185	0	0	0	0.00491116	0	0	0	0.0155878	0	0.0168878	0	0.38507	0.0136709	0.782188	0	0	0	0	0.852611	0.5	0.5	0.0885793	0.0511926	0.00491116	0.0324756	0.634381	0	0.0174778	557.264
64	0.0135453	0.00831327	0.00967167	0.00681575	0	0	0.0067115	0	0.00370986	0.00140536	0.0109326	0.00358551	0	0	0.359057	0.0139693	0.120293	0	0.0282632	0.28083	0.0175238	2.22041	0.5	0.5	0.0646908	0.0383459	0.0104214	0.0159235	0.415258	16.0257	0.116127	621.61
65	0.0262306	0.0116729	0.020727	0.0074097	0	0.0532985	0	0.018377	0	0	0	0.00228354	0	0.00568171	0.248989	0	0.0539936	0	0	0.0599103	0.00318723	1.78622	0.5	0.5	0.145681	0.0660402	0.0716755	0.00796524	0.120612	18.797	0	606.122
66	0.0309093	0.0257122	0.0104302	0.00290467	0	0.020978	0	0.043197	0.00631456	0	0.0185239	0.000833389	0	0.000914057	0.542765	0	2.69975	0.0253842	0.0120572	0.043535	0	0.782732	0.5	0.5	0.160717	0.0699564	0.0704896	0.0202713	0.289771	0	0	551.963
67	0.0359547	0.0131498	0.019639	0	0	0	0.0158331	0	0	0.002967	0	0	0.0549098	0.00298507	0.288678	0	1.96514	0	0	0	0	2.04765	0.5	0.5	0.145438	0.0687435	0.0158331	0.0608619	0.885347	0	0	615.781
68	0.0212544	0.0114564	0.0233394	0	0	0.0230118	0.0125451	0.0237772	0	0	0	0.00339882	0.0102075	0	0.460872	0.00437836	0.164467	0	0	0.00439445	0.00411531	2.13407	0.5	0.5	0.128991	0.0560501	0.0593341	0.0136063	0.242752	1.06783	0.0266215	618.747
69	0.188561	0.0237874	0.0577671	0.0233517	0.123518	0.0115156	0.00457387	0.0173133	0.00505673	0	0.0150237	0.00417419	0	0.0160386	0.587963	0.00956721	0.608045	0.0204735	0	0	0.00299546	3.15019	0.5	0.5	0.490681	0.293467	0.161977	0.0352365	0.12007	0	0.0157344	647.684
70	0.00503503	0	0	0.00220437	0	0	0	0	0.00419383	0	0	0.00812903	0	0	0.24294	0.0053266	0.000691825	0.0170016	0	0	0	5.79797	0.5	0.5	0.0195623	0.0072394	0.00419383	0.00812903	1.12289	0	7.69934	696.993
71	0.0291559	0.0208251	0.0284657	0.0145521	0	0	0	0.0181487	0	0.00555577	0	0.00195542	0.0164975	0	0.434449	0	0.111426	0.0161922	0.234121	0.00659612	0.00632479	5.64748	0.5	0.5	0.135156	0.0929987	0.0181487	0.0240087	0.258162	1.0429	0	694.759
72	0.0295245	0.0573712	0.0415172	0	0.0217544	0	0	0.0552596	0.00538959	0	0.0159909	0	0.0167265	0.00568957	1.63239	0	0.876123	0.00820258	0	0.0100131	0	4.40777	0.5	0.5	0.249223	0.128413	0.0824036	0.038407	0.29909	0	0	674.197
73	0.0308959	0.0316711	0.0560748	0.00517803	0	0.0369772	0.0101874	0	0	0	0.0502217	0	0.0701001	0.00594259	0.822193	0.00713165	0.212274	0	0	0.00698108	0	5.90563	0.5	0.5	0.297249	0.12382	0.0471645	0.126264	1.01974	0	0.0335965	698.562
74	0	0	0.00416323	0	0	0	0	0	0	0	0	0	0.0703559	0.00132207	0	0	0	0	0	0	0	1.89464	0.5	0.5	0.0758412	0.00416323	0	0.0716779	17.2169	0	0	610.263
75	0.00582316	23.5196	0.0733362	2.05407	3.34304	1.49155	19.1762	6.74497	86.0473	36.3041	178.947	47.8332	541.869	102.911	12.8831	129.659	224.491	1120.4	10299.9	2.74441	1.28076	0.821465	1	0.5	1050.32	25.6528	116.803	907.864	35.3904	2.1428	0.577569	600.311
76	0.152381	39.6188	0.14402	1.52564	2.52753	0.704859	15.6122	5.09337	67.8754	26.8299	134.71	33.8489	366.308	66.2365	16.3043	206.136	259.474	826.456	10857.3	4.45079	2.12705	1.02197	1	0.5	761.187	41.4409	91.8134	627.933	15.1525	2.09247	0.794436	615.651
77	0.0970021	40.5974	0.101127	1.17638	1.35101	0.662426	7.99213	2.42656	33.1992	15.4207	90.2617	26.0125	328.269	70.2639	42.338	506.612	605.962	597.527	10883.5	3.51655	0.494038	2.98817	1	0.5	617.831	41.9719	45.6313	530.227	12.6329	7.11797	0.836047	699.58
78	3.01927	35.8693	1.36294	11.0072	9.51231	0.439211	53.3183	18.2104	222.887	80.0558	337.696	70.0306	619.437	96.4616	22.893	192.426	341.179	2125.66	8696.43	11.031	3.50125	2.6632	1	0.5	1559.31	51.2588	304.367	1203.68	23.4824	3.15058	0.564002	689.822
79	0.023144	7.80838	0.0562966	1.93453	3.38658	0.673516	17.3616	6.17613	78.4278	29.8993	144.027	34.4128	359.232	63.0779	10.6929	87.217	142.884	893.941	9110.75	0.719217	0.459758	1.76467	1	0.5	746.497	9.82235	106.026	630.649	64.2056	1.56434	0.610404	656.487
80	2.61476	14.3636	1.69392	11.5408	9.32257	1.66534	18.7696	5.4819	61.4399	22.2195	99.4707	22.2119	205.208	32.9905	48.2731	46.9055	134.602	617.58	13266.5	5.83541	2.69716	2.61173	1	0.5	508.993	30.2131	96.6794	382.101	12.6469	2.16354	0.348475	688.188
81	0.00567733	20.5969	0.0941121	1.41139	3.1197	0.659907	16.7088	5.06246	61.0793	22.9606	104.899	25.2891	260.977	45.136	186.926	225.321	321.003	694.573	11223.3	1.3486	0.955422	2.46859	1	0.5	568	22.1081	86.6301	459.262	20.7734	1.41152	0.701929	683.498
82	13.2116	57.0414	2.51484	11.7953	3.08285	1.55496	12.6601	3.63679	38.2555	14.8179	65.5206	16.1888	175.42	32.5289	8.88288	308.646	363.183	484.422	10691.8	2.23073	0.4417	2.21121	1	0.5	448.229	84.5632	59.1902	304.476	3.60057	5.05034	0.849837	674.466
83	0.0924966	26.7773	0.0440891	0.500528	1.44241	0.674118	7.15534	2.63004	32.9273	14.4263	82.6104	24.0903	318.507	68.4597	14.9511	261.363	675.92	551.206	10978.5	2.32757	0.49617	2.43819	1	0.5	580.337	27.4145	44.8292	508.093	18.5338	4.69107	0.386677	682.473
84	0	45.3046	0.0615403	1.50644	2.43848	1.34444	12.2438	4.08663	49.1567	18.8265	90.1839	23.0749	267.036	51.4677	12.7135	539.048	494.483	615.241	10605.1	3.79881	0.763322	2.75846	1	0.5	566.732	46.8725	69.27	450.589	9.61307	4.97667	1.09013	692.78
85	0.0919044	55.5325	0.243703	4.47061	8.53131	3.10914	35.9398	11.1331	123.157	42.1251	179.049	40.8965	408.884	65.1745	6.96461	363.415	242.227	1241.98	9800.63	3.62542	0.914393	2.83709	1	0.5	978.338	60.3387	181.87	736.13	12.2	3.96484	1.50031	695.159
86	0.154366	31.0455	0.177896	1.56315	3.11292	1.49787	13.4621	4.44153	50.8507	17.7616	78.9648	18.3857	190.282	32.6538	5.10904	169.938	198.935	547.069	9773.67	2.74367	0.703566	2.26309	1	0.5	444.354	32.9409	73.3651	338.048	10.2623	3.89966	0.854242	676.355
87	2.70898	25.1211	0.975025	6.1238	3.85014	0.864618	18.9526	6.88748	89.4207	34.6677	157.012	37.2539	379.019	62.0336	12.1261	190.427	218.958	1007.17	10699	6.08485	2.18174	2.40376	1	0.5	824.891	34.9289	119.976	669.986	19.1815	2.78898	0.869699	681.299
88	8.3552	35.7332	2.29636	11.4284	4.32036	0.259282	18.2547	6.47699	90.834	36.91	179.962	44.5968	458.461	83.4013	16.0642	331.591	518.826	1121.5	11909.8	4.99325	2.17264	2.0763	1	0.5	981.289	57.8131	120.145	803.331	13.8953	2.29824	0.639118	669.379
89	65.6476	148.141	15.6756	69.482	16.8364	2.22629	37.002	10.8542	123.193	45.7485	209.78	51.1995	509.812	91.4534	7.23459	135.284	130.668	1367.31	9914.21	1.35242	0.543371	1.92947	1	0.5	1397.05	298.946	190.111	907.994	3.03732	2.48895	1.03533	663.521
90	0.292779	14.636	0.473013	3.37834	2.40961	1.05474	6.20656	1.8359	22.8117	8.69979	47.3464	13.6096	170.01	40.6453	12.7369	87.9393	197.627	303.019	11457.1	0.85122	0.255902	2.59336	1	0.5	333.41	18.7802	34.3185	280.311	14.9259	3.32635	0.444976	687.598
91	0.0171118	18.6368	0.0827357	1.68805	2.71427	0.523981	13.2644	4.35614	52.9593	20.9673	99.996	24.2342	256.361	47.7476	12.7127	169.576	160.309	626.143	10882.3	1.49286	0.872451	1.6513	1	0.5	543.549	20.4247	73.818	449.306	21.9982	1.71111	1.05781	651.324
92	0.0684423	30.3268	0.272734	2.22552	3.10883	0.974785	11.6114	3.39981	38.8297	13.298	61.4123	15.0088	158.803	29.8083	266.783	261.002	468.672	427.999	11177.2	0.889417	0.526421	2.53818	1	0.5	369.148	32.8935	57.9246	278.33	8.46155	1.68956	0.556896	685.805
93	0.00556413	6.68428	0.0193612	0.459038	1.49947	0.297229	7.79185	2.58157	35.0698	13.6005	65.571	16.1835	171.889	32.6212	41.8376	29.3822	72.8169	418.358	11031	0.801437	0.817863	2.29496	1	0.5	354.273	7.16825	47.2399	299.865	41.8324	0.979915	0.403508	677.497
94	0	3.08697	0.0123264	0.329941	0.801475	0.119365	7.66245	2.72758	37.2887	15.9571	78.0219	19.1757	199.401	38.2032	41.0062	25.069	71.1502	468.813	9584.39	0.532729	0.588006	2.35954	1	0.5	402.788	3.42924	48.5996	350.759	102.285	0.905993	0.352339	679.771
95	0	12.7031	0.00679739	0.441218	0.477926	0.453956	5.07828	1.69032	25.9553	12.2916	75.664	21.8405	284.887	69.5536	23.2609	168.655	489.165	441.973	9984	1.57549	0.54732	1.79921	1	0.5	511.043	13.1511	33.6558	464.236	35.3002	2.87855	0.344781	658.005
96	0	11.7603	0.0346741	0.695319	1.92393	0.5359	12.4137	4.60246	58.5457	23.8662	113.734	28.5218	296.5	52.3179	4.50364	80.9863	80.0349	707.374	9002.19	1.19706	0.632633	2.1895	1	0.5	605.451	12.4903	78.0217	514.939	41.2272	1.89219	1.01189	673.665
97	37.9363	86.0708	10.4289	55.8195	22.2181	3.53345	73.4014	22.0658	255.537	92.109	396.403	85.3424	801.738	133.029	7.72239	121.976	134.935	2558.76	8000.62	2.00384	0.646962	2.41098	1	0.5	2075.63	190.255	376.756	1508.62	7.92945	3.09731	0.903961	681.546
98	0	28.2284	0.0577092	1.19297	4.51986	1.77943	22.653	8.07299	107.339	45.7611	236.49	63.1473	704.227	134.957	18.7649	166.597	332.794	1448.9	10287.5	5.30405	1.98942	1.77041	1	0.5	1358.43	29.4791	144.364	1184.58	40.1837	2.66613	0.500599	656.741
99	0.00550856	20.1503	0.0383048	0.451369	1.35443	0.546815	7.04755	2.49413	34.0787	16.1252	88.5324	25.1797	319.742	69.9139	13.9265	133.218	185.116	560.58	9643.67	1.56561	0.269524	1.34269	1	0.5	585.66	20.6455	45.5217	519.493	25.1626	5.8088	0.719648	635.598
100	0.00579904	0.131923	0	0.0196468	0.0670723	0.119569	1.34826	0.794114	9.0624	2.58806	7.92036	1.46235	11.5562	1.55427	81.9009	0.585326	216.059	92.8704	11711.7	0.704316	0.923989	1.71986	1	0.5	36.63	0.157369	11.3914	25.0812	159.378	0.762256	0.0027091	654.48
101	0.0170318	15.1919	0.0888483	1.20241	2.48127	0.79272	13.54	4.47378	52.3918	18.8093	88.7212	20.8315	222.373	40.6657	94.8128	121.533	154.181	586.108	10631.2	1.42268	1.32752	2.82246	1	0.5	481.58	16.5002	73.6796	391.401	23.7209	1.07168	0.788245	694.72
102	0	0.020116	0	0	0.0477228	0.0290206	0.0995031	0.0824022	1.90515	1.27295	10.4758	4.04123	52.7969	11.1591	0.977573	0.0787114	1.88249	50.38	12253.1	0.550826	0.322679	2.92932	1	0.5	81.9298	0.020116	2.1638	79.7459	3964.31	1.70704	0.0418124	697.88
103	37.8481	87.2935	8.00486	27.1829	3.51361	0.376155	8.04995	2.45391	27.4802	10.5259	48.7217	12.5369	136.84	25.6614	45.363	85.5477	65.1602	335.596	11274.5	0.728525	0.631178	2.35168	1	0.5	436.489	160.329	41.8739	234.286	1.46128	1.15423	1.31288	679.497
104	0.0267231	17.4706	0.0340972	0.672095	2.95752	0.858567	17.2442	6.57051	95.8165	36.1817	182.671	39.7682	453.064	78.4598	43.5263	242.144	619.829	1239.22	12736.6	16.7179	3.63802	5.12184	1	1	931.796	18.2035	123.447	790.145	43.4062	4.59532	0.390662	686.548
105	0.0052412	0.10274	0.00222687	0.0389128	0.166883	0.120139	1.73053	0.974811	16.5967	8.80204	54.6576	15.4684	197.544	50.199	13.7889	0.784034	35.1938	290.67	7878.65	0.366011	0.180644	1.69926	1	0.7	346.409	0.149121	19.5891	326.671	2190.65	2.02614	0.0222776	628.116
106	0.0126676	0.277243	0.015441	0.158632	0.17022	0.169167	1.34643	0.526638	7.99712	4.15321	24.2466	6.87985	87.0492	22.2183	55.114	0.909626	141.954	148.392	7623.87	0.324484	0.147266	1.4349	1	0.7	155.221	0.463983	10.2096	144.547	311.535	2.20339	0.00640789	615.858
107	0.01	0.178822	0.01	0.0141302	0.107845	0.0875186	0.725104	0.254676	4.65818	2.32841	14.4959	4.17069	53.9771	14.2065	45.4613	1.00932	118.513	84.0889	8280.7	0.174302	0.101281	0.794512	1	0.7	95.2248	0.212952	5.83333	89.1785	418.773	1.72096	0.00851653	575.507
108	0.0760052	0.287212	0.0299782	0.108683	0.187346	0.1275	1.56976	0.674954	10.9305	5.47594	32.5258	9.2885	116.95	28.1737	34.4132	1.46078	95.6971	182.033	8316.21	0.364361	0.227817	1.12397	1	0.7	206.406	0.501878	13.4901	192.414	383.388	1.59936	0.0152646	598.73
109	0.01	0.161824	0.00287838	0.027981	0.287037	0.188189	2.36054	0.934348	14.2938	7.07237	41.5062	11.9436	155.002	39.4035	32.3184	1.2514	88.1055	240.313	7860.05	0.232306	0.15921	1.18871	1	0.7	273.195	0.202683	18.0639	254.928	1257.77	1.45911	0.0142034	602.599
110	0.01	0.0720133	0.01	0.0251875	0.117234	0.0929403	1.17285	0.511796	9.10696	4.62353	28.3768	8.3602	111.218	29.5122	28.5121	1.0064	77.0806	155.17	8559.09	0.216369	0.14798	1.45612	1	0.7	193.209	0.117201	11.0018	182.09	1553.66	1.46214	0.0130565	616.909
111	0.0135265	0.590647	0.0540224	0.754321	0.759291	0.570825	3.25428	1.08408	16.6941	8.23786	49.8937	14.7275	184.643	45.877	39.8288	1.07528	104.16	277.511	8008.95	0.28669	0.177789	1.92058	1	0.7	327.154	1.41252	22.3626	303.379	214.779	1.61253	0.0103234	637.205
112	0.00122611	0.0757201	0.01	0	0.0320537	0.0348057	0.643908	0.302407	5.09323	2.62728	17.3969	5.04038	65.7542	16.0824	13.4329	0.227675	36.0582	92.1743	8423.97	0.255875	0.15764	0.854707	1	0.7	113.095	0.0869462	6.1064	106.901	1229.51	1.62316	0.00631408	580.292
113	0.01	0.114381	0.00266379	0.010349	0.108018	0.106229	1.08602	0.623949	11.5325	6.81437	43.447	13.3076	166.423	41.0259	25.2081	0.895013	66.2005	237.485	7974.47	0.234504	0.105553	0.961469	1	0.7	284.612	0.137394	13.4567	271.018	1972.56	2.22166	0.0135197	588.12
114	0.0411088	0.401211	0.0166348	0.127239	0.165239	0.14775	1.35551	0.593662	9.15533	4.68052	27.8361	7.97419	103.583	26.3354	47.2972	1.21036	129.761	161.542	8123.13	0.212813	0.1853	0.788379	1	0.7	182.413	0.586194	11.4175	170.409	290.705	1.14848	0.00932763	575.002
115	0.00376301	0.14596	0.001611	0.0187445	0.124934	0.106935	1.3025	0.69358	10.8946	5.67191	34.5242	10.0635	127.538	31.9739	25.7924	1.00203	68.1103	188.636	8315.11	0.250234	0.187345	0.994603	1	0.7	223.064	0.170079	13.1226	209.771	1233.38	1.33568	0.0147119	590.4
116	0.058726	1.64956	0.133893	1.58386	0.798847	0.941477	3.00899	0.765377	10.4372	4.64922	27.2598	7.76446	97.8841	24.154	88.5825	1.63817	233.308	163.29	8045.22	0.195076	0.112156	2.1829	1	0.7	181.09	3.42604	15.9519	161.712	47.2007	1.73933	0.0070215	646.908
117	0.756393	0.732394	0.0643475	0.120083	0.219732	0.189381	2.06124	0.806037	12.5944	5.06158	23.8732	5.69228	58.3309	11.2344	19.0256	1.7079	49.3377	175.91	9855.97	0.169823	0.0830397	1.51558	1	0.7	121.736	1.67322	15.8708	104.192	62.2707	2.04508	0.0346166	619.787
118	0.111082	0.719238	0.0203128	0.0589782	0.176269	0.10471	1.5951	0.64372	10.4107	5.23323	29.9264	8.42166	104.803	25.5819	54.9272	1.99113	145.954	172.566	9396.82	0.233989	0.165965	1.69275	1	0.7	187.806	0.909611	12.9305	173.966	191.253	1.40987	0.0136421	627.835
119	0.0381135	0.727397	0.00984853	0.0619643	0.219265	0.159185	1.77589	0.777431	11.57	5.8468	32.1906	8.38775	97.1135	22.265	18.8921	1.73679	48.7652	197.102	9490.96	0.196209	0.0610561	1.62055	1	0.7	181.143	0.837323	14.5018	165.804	198.016	3.21358	0.0356154	624.645
120	0.00409551	0.42265	0.00396621	0.0307206	0.167974	0.132032	1.88521	0.796065	11.7019	5.32246	27.6705	6.66147	65.6839	13.659	27.9258	2.50567	70.6982	177.101	10239.9	0.179768	0.0612332	0.54275	1	0.7	134.142	0.461432	14.6832	118.997	257.887	2.93579	0.0354418	551.38
121	0.00165173	0.384311	0.00213215	0.0309689	0.0784634	0.0769373	1.16088	0.584485	9.09407	4.75654	26.5999	7.30696	87.3059	20.6417	25.2542	1.94095	64.9448	155.77	11089.8	0.192737	0.0708986	1.39904	1	0.7	158.025	0.419064	10.9948	146.611	349.854	2.71849	0.0298862	614.052
122	0.01	0.378873	0.00087491	0.0305063	0.117217	0.0988749	1.09932	0.611292	9.11846	4.8994	27.2868	7.75061	96.6706	23.5534	20.7705	2.57415	53.3625	160.027	9294.29	0.180906	0.0944757	1.57547	1	0.7	171.626	0.420254	11.0452	160.161	381.104	1.91484	0.0482389	622.592
123	0.01	0.467477	0.01	0.0422714	0.167534	0.146722	1.82257	0.828621	12.7503	6.24887	34.6107	9.73399	114.419	27.7728	31.9683	3.03491	82.0472	210.083	9961.87	0.173939	0.0650075	0.689759	1	0.7	209.031	0.529749	15.7157	192.785	363.918	2.67567	0.0369898	566.392
124	0.01	0.457417	0.000803087	0.0140165	0.0540846	0.0852567	0.795132	0.37983	6.30094	3.46521	21.5109	6.33904	81.347	21.2987	14.8191	2.15836	38.7508	116.704	9548.53	0.176328	0.0505975	0.377124	1	0.7	142.058	0.482236	7.61525	133.961	277.791	3.48491	0.0556983	529.577
125	0.0972293	0.981591	0.0394678	0.162705	0.343937	0.208641	2.22087	0.92401	12.5649	6.15695	35.5582	9.82248	114.594	28.4311	58.0265	3.41468	150.185	212.618	9329.95	0.264699	0.115574	1.91506	1	0.7	212.106	1.28099	16.2624	194.563	151.884	2.2903	0.0227364	636.99
126	0.00378521	0.389781	0.000810207	0.0331625	0.114899	0.119513	1.35532	0.628066	9.01154	4.30579	22.3013	5.51646	60.8436	13.3825	18.8901	1.97896	49.2249	143.438	9576.4	0.191018	0.0503899	0.790841	1	0.7	118.007	0.427539	11.2293	106.35	248.748	3.79081	0.0402024	575.205
127	0.01	0.377832	0.0018805	0.0218825	0.114299	0.0912956	1.10016	0.510886	7.21823	3.02922	13.5276	3.09486	30.8845	5.80652	16.3461	1.89991	42.3597	101.355	9930.97	0.167922	0.0447068	0.914827	1	0.7	65.7892	0.411595	9.03487	56.3427	136.889	3.75608	0.0448519	584.796
128	0.0135084	0.474277	0.002365	0.0321033	0.111817	0.0618283	0.938149	0.393911	6.19384	3.08378	16.2521	4.32586	48.8726	10.8676	25.2749	1.8884	66.3824	101.448	9561.15	0.199651	0.0723469	1.15193	1	0.7	91.6237	0.522254	7.69954	83.4019	159.696	2.75963	0.0284473	600.423
129	0.00124855	0.44655	0.00320632	0.0139906	0.135344	0.107769	1.33302	0.600903	9.42016	4.18453	19.4197	4.6008	46.0723	8.27608	25.7198	1.85642	68.9991	139.513	10691.4	0.157367	0.0531266	0.442217	1	0.7	94.6157	0.464996	11.5972	82.5535	177.536	2.9621	0.026905	538.969
130	0.0708992	0.618682	0.0102454	0.0397472	0.102671	0.110524	1.84917	0.841267	12.11	6.12143	36.9423	9.94124	121.808	29.472	51.3392	2.56237	136.099	209.585	9403.42	0.238687	0.146231	1.11654	1	0.7	220.038	0.739573	15.0136	204.285	276.22	1.63226	0.0188272	598.274
131	0.01	0.345267	0.01	0.0534355	0.160902	0.114314	1.62614	0.716006	9.22652	3.81458	17.5988	4.01258	40.7149	7.81094	13.4116	1.60136	35.8431	130.851	10641.3	0.176302	0.0214811	0.524946	1	0.7	86.2144	0.418703	11.8439	73.9519	176.621	8.20731	0.0446768	549.333
132	0.0148348	0.506611	0.0028664	0	0.102711	0.0514851	0.907935	0.390152	6.65765	3.0631	16.9092	4.47422	50.2098	11.063	23.7994	1.50017	63.4759	107.209	9726.84	0.189681	0.0919553	0.829846	1	0.7	94.3536	0.524313	8.10994	85.7193	163.489	2.06276	0.0236337	578.352
133	0.0205473	0.968133	0.00589237	0.0171191	0.157455	0.129558	1.48261	0.693409	9.52877	4.42411	23.3251	6.14457	69.5473	15.9255	21.0013	2.05967	55.7873	149.655	9709.14	0.22202	0.0913576	1.28746	1	0.7	132.37	1.01169	11.9918	119.367	117.987	2.43023	0.0369201	608.172
134	0.00943549	0.476495	0.00435249	0.0353938	0.174528	0.17055	1.67236	0.761339	11.7128	5.9627	34.2627	9.23029	114.291	27.3102	16.4284	2.83074	43.562	201.501	9451.39	0.19321	0.070065	1.49671	1	0.7	206.074	0.525677	14.4916	191.057	363.449	2.75758	0.0649819	618.884
135	0.01	0.440596	0.0014266	0.00830169	0.0625233	0.106406	1.06127	0.484992	8.29207	4.22909	24.9875	7.18538	87.793	22.0059	20.0776	1.81728	53.5863	147.938	9390.35	0.193753	0.0827602	0.0769492	1	0.7	156.668	0.460324	10.0073	146.201	317.604	2.34114	0.0339131	446.502
136	0.026735	0.666218	0.00572287	0.0666022	0.259471	0.212184	2.6243	1.14612	17.844	8.67287	50.1124	13.7484	164.737	38.6019	60.1084	4.43516	159.923	287.294	9550.85	0.264977	0.160037	0.785654	1	0.7	298.724	0.765278	22.0861	275.872	360.486	1.65572	0.0277332	574.777
137	0.01	0.615853	0.01	0.0577373	0.0447536	0.0989461	2.33241	0.872271	12.993	6.28927	34.5845	9.17762	99.2554	23.0227	87.9847	53.2886	117.277	207.678	7952.68	0.109382	0.097944	1.755	1	0.7	189.365	0.693591	16.3414	172.33	248.46	1.11678	0.454381	630.495
138	0.00161951	0.147662	0.01	0.024185	0.119365	0.168877	1.32544	0.572818	7.74456	3.28411	16.0596	3.95873	42.8154	9.6663	4.57784	0.395044	11.7124	113.178	9567.94	0.0956001	0.0227725	0.815762	1	0.7	85.8986	0.183466	9.93106	75.7841	413.068	4.19805	0.0337286	577.23
139	0.01	0.238563	0.01	0.0717835	0.159259	0.125769	1.66722	0.629192	9.48512	4.11964	20.4745	4.79722	51.3205	11.0011	2.82266	0.990659	7.08033	144.826	9734.43	0.115047	0.0151103	1.09859	1	0.7	104.11	0.330346	12.0666	91.713	277.627	7.6138	0.139917	597.162
140	0.01	0.283415	0.00202023	0.0352375	0.0819207	0.0716976	1.01824	0.322331	4.45832	1.72562	8.10087	1.69797	17.2406	3.46705	17.3726	5.70834	41.7036	59.1422	9650.73	0.165047	0.0329731	1.32001	1	0.7	38.5153	0.330673	5.9525	32.2321	97.4743	5.00551	0.136879	609.93
141	0.01	0.224347	0.00883112	0.0616032	0.37011	0.28045	2.41066	1.01616	12.9371	5.33014	25.1733	5.81157	63.2032	12.8885	13.8916	1.10609	34.3502	182.475	9781.84	0.19661	0.126135	0.0431895	1	0.7	129.726	0.304782	17.0144	112.407	368.811	1.55873	0.0322003	420.419
142	0.0092595	0.455561	0.00237728	0.0119045	0.160655	0.150634	1.40091	0.673371	8.74402	3.93361	19.0636	4.52787	45.1411	9.03231	28.9952	4.00583	77.7272	128.786	10723.9	0.332594	0.133997	0.316719	1	0.7	93.3072	0.479103	11.1296	81.6985	170.524	2.48209	0.051537	519.528
143	0.01	0.283468	0.00380601	0.13235	0.372444	0.344432	2.75267	0.97888	13.2961	5.30255	23.1821	5.25214	51.4345	9.45423	4.81518	3.29424	12.603	171.374	10928.4	0.158749	0.021305	0.839332	1	0.7	112.8	0.429624	17.7445	94.6255	220.252	7.45125	0.261386	579.098
144	0.01	0.0347159	0.00241572	0	0.0218304	0.0958054	0.727077	0.270265	3.09864	0.976348	3.91979	0.815522	7.61895	1.48756	3.81522	0.0913683	10.3024	35.5734	10751.7	0.131573	0.0156361	0.561655	1	0.7	19.0789	0.0471316	4.21362	14.8182	314.4	8.41467	0.00886865	553.492
145	0.00795242	0.234787	0.05	0.0297476	0.0762205	0.0700521	0.886786	0.34191	4.68203	1.48883	6.33931	1.34492	12.5453	2.24589	5.7055	0.639292	15.0163	54.7561	9685.55	0.168647	0.0347309	0.769685	1	0.7	30.3437	0.322487	6.05699	23.9642	74.3106	4.85581	0.0425731	573.443
146	0.01	0.351976	0.00253007	0.0952545	0.110945	0.184124	1.63748	0.62313	7.88345	3.34895	14.0036	3.03725	28.3891	5.43291	16.3859	3.29125	41.4569	111.532	9677.64	0.255763	0.0603253	0.821219	1	0.7	65.1107	0.45976	10.4391	54.2118	117.913	4.23972	0.0793896	577.667
147	0.01	0.250614	0.00583233	0.0971966	0.246335	0.228862	1.92267	0.667907	8.69613	3.12878	14.69	3.18151	31.901	6.7095	6.68464	1.23652	17.1233	110.566	9640.14	0.224138	0.0463423	1.13179	1	0.7	71.7363	0.363643	11.7619	59.6108	163.927	4.83659	0.072213	599.208
148	0.01	0.209765	0.01	0.0164171	0.0701908	0.0906883	0.984442	0.334911	4.43566	1.90439	7.98446	1.90151	17.9996	3.40112	13.4544	2.50673	34.6676	62.9453	10409	0.200298	0.0356314	0.910018	1	0.7	39.3531	0.246182	5.91589	33.1911	134.823	5.62137	0.0723077	584.445
149	0.01	0.155035	0.01	0	0.0401137	0.0702126	0.716226	0.261757	3.29653	1.2508	5.16808	1.13439	10.8017	2.16959	7.55743	1.22431	19.8234	42.0081	10172.6	0.171971	0.0518448	1.27876	1	0.7	25.0845	0.175035	4.38484	20.5246	117.26	3.31703	0.061761	607.696
150	0.00116923	0.23702	0.01	0.0176009	0.066819	0.114036	0.816578	0.349477	4.77675	1.97739	9.28237	2.06733	20.5158	4.30792	7.50929	1.39231	19.3248	68.0967	9865.26	0.129492	0.0180948	1.07008	1	0.7	44.5403	0.26579	6.12366	38.1509	143.537	7.15631	0.072048	595.364
151	0.01	0.518177	0.01	0.0449332	0.115026	0.164119	1.59178	0.682281	9.34936	4.4629	23.1245	6.01413	61.1884	14.0187	20.7934	5.66216	52.3872	147.413	9588.19	0.317125	0.0908553	0.839951	1	0.7	121.294	0.58311	11.9026	108.809	186.6	3.49044	0.108083	579.146
152	0.01	0.0601026	0.01	0	0.11976	0.09655	1.16188	0.552123	7.07001	2.60348	12.0165	2.59507	25.4986	5.30372	6.04949	0.171661	17.0556	92.0925	10524.2	0.125719	0.0150645	0.835945	1	0.7	57.0978	0.0801026	9.00032	48.0174	599.449	8.34539	0.0100647	578.832
153	0.00105806	5.15449	0.0150973	0.435459	0.856215	0.39721	2.6913	0.524124	3.48394	0.805719	2.36814	0.367867	2.96427	0.440488	50.9988	42.2895	126.377	24.2013	10632	0.114723	0.0386371	2.81691	1	0.7	20.5054	5.6061	7.95278	6.94648	1.23909	2.96923	0.33463	666.861
154	0.0148559	4.5689	0.00963205	0.213559	0.459103	0.221204	2.50337	0.54796	4.7463	1.22117	3.85105	0.644174	4.95974	0.737027	57.9021	48.9035	140.932	36.6963	10647.8	0.264314	0.106105	2.47352	1	0.7	24.698	4.80694	8.47793	11.4132	2.37431	2.49107	0.347001	656.581
155	0.00349087	5.52091	0.016974	0.319595	0.579122	0.400502	2.21717	0.632484	4.69136	1.17602	3.75566	0.670473	5.27118	0.814059	44.4645	30.0813	111.986	35.7578	10664.8	0.137659	0.0917814	2.75331	1	0.7	26.069	5.86097	8.52063	11.6874	1.99411	1.49985	0.268616	665.039
156	0.00222823	4.13549	0.00816704	0.324664	0.545901	0.333001	2.16116	0.394234	3.56964	0.883428	2.67021	0.516304	3.77962	0.642407	27.1948	18.735	67.6725	27.263	11332.8	0.12981	0.0390493	1.13581	1	0.7	19.9665	4.47055	7.00394	8.49197	1.89953	3.32425	0.276849	599.451
157	0.00793839	4.60071	0.00440047	0.249835	0.59574	0.273278	3.32403	0.891681	7.09124	2.15317	6.65486	1.18	9.20585	1.46415	61.7433	56.8041	151.008	61.8817	10572.2	0.194568	0.0891378	1.94311	1	0.7	37.6969	4.86288	12.176	20.658	4.2481	2.18278	0.376166	638.081
158	0.00295985	5.20662	0.0105219	0.403353	0.918334	0.47718	3.75968	0.825399	7.74455	2.05605	6.52263	1.02709	8.16752	1.36039	45.9823	32.4933	113.834	57.9594	10678	0.165371	0.0548095	2.50357	1	0.7	38.4823	5.62345	13.7251	19.1337	3.40248	3.0172	0.285445	657.526
159	0.0141129	5.03653	0.0190612	0.244264	0.675002	0.396675	3.77923	0.980618	9.52819	2.71056	8.99578	1.60034	12.5975	1.91676	59.3702	51.5499	145.406	79.262	10534.3	0.227	0.118399	2.0571	1	0.7	48.4946	5.31397	15.3597	27.8209	5.23542	1.91725	0.354525	642.384
160	0.00221138	5.79703	0.0137664	0.470505	0.873263	0.4385	4.17967	1.02669	9.48097	2.67776	8.50339	1.60502	12.5434	1.97585	62.5579	43.0926	156.464	78.296	10877	0.287196	0.164592	3.51156	1	0.7	49.588	6.28351	15.9991	27.3054	4.34556	1.74489	0.275415	684.82
161	0.00117669	5.79449	0.0166827	0.403954	0.967085	0.338152	3.40133	0.788869	5.65788	1.39394	4.19932	0.708402	5.30113	0.811024	52.0936	33.1369	130.115	40.7344	11316.4	0.223375	0.127824	2.99454	1	0.7	29.7834	6.2163	11.1533	12.4138	1.99698	1.74753	0.254674	671.775
162	0.0103626	6.21928	0.0288198	0.276907	0.735988	0.309756	3.01262	0.786231	6.94777	1.63718	5.7378	1.03538	7.58784	1.28289	70.6135	64.846	173.228	48.6391	11100.4	0.273562	0.110268	3.37844	1	0.7	35.6088	6.53537	11.7924	17.2811	2.64424	2.48087	0.374338	681.621
163	0.01	7.15605	0.0257241	0.516593	1.39246	0.447123	5.33611	1.28433	9.38359	2.21368	6.96479	1.18561	8.58409	1.38363	60.9853	46.2896	155.505	66.5389	11807.4	0.216742	0.157637	2.12568	1	0.7	45.8838	7.70836	17.8436	20.3318	2.63763	1.37495	0.297673	644.878
164	0.01	6.15466	0.0161154	0.378558	0.832425	0.366223	3.78583	0.973414	7.89854	2.109	5.95343	1.01725	7.33228	0.992606	64.7071	62.0707	159.792	58.8621	11208.7	0.175321	0.0822218	2.24348	1	0.7	37.8203	6.55934	13.8564	17.4046	2.6534	2.13229	0.388447	649.009
165	0.01	5.9069	0.0202027	0.409951	0.731619	0.354726	3.44494	0.989793	8.45163	2.55569	8.69486	1.48357	11.5596	1.89788	68.4128	58.0564	171.582	73.2555	10648.6	0.219531	0.108005	3.34017	1	0.7	46.5114	6.34705	13.9727	26.1916	4.12658	2.0326	0.33836	680.683
166	0.00408697	5.37695	0.0309139	0.565132	0.828754	0.38476	2.9543	0.508648	3.58795	0.726914	2.30244	0.382359	3.03228	0.53162	52.3901	48.8163	132.568	23.9382	11111.2	0.143839	0.0415702	2.80588	1	0.7	21.2171	5.97708	8.26442	6.97561	1.16706	3.46014	0.368237	666.547
167	0.01	5.97634	0.0311324	0.538932	1.12347	0.50919	3.56997	0.737997	5.88223	1.57503	5.14034	0.835015	7.08442	1.07967	58.2881	49.4378	144.206	47.3347	11106.5	0.147841	0.0616206	2.50633	1	0.7	34.0937	6.5564	11.8229	15.7145	2.39681	2.39921	0.342827	657.613
168	0.0021558	5.50545	0.023073	0.294498	0.511115	0.222763	1.74074	0.350175	2.33815	0.548568	1.55822	0.263517	1.90891	0.310981	59.5299	60.3184	145.119	16.4795	11089.2	0.1424	0.0616586	2.68547	1	0.7	15.5783	5.82518	5.16294	4.59019	0.787992	2.30948	0.415648	663.056
169	0.01	4.9259	0.010537	0.253362	0.524429	0.281965	3.03235	0.742958	7.82521	2.62524	9.50664	1.80188	15.1986	2.56969	46.79	30.2623	116.977	75.745	10920.7	0.386014	0.218546	3.31162	1	0.7	49.3087	5.1998	12.4069	31.702	6.09677	1.76628	0.258704	679.977
170	0.01	8.64109	0.0679742	1.67062	3.03991	1.24298	10.3018	2.04818	13.5795	2.98816	8.64834	1.39884	9.64467	1.42096	99.7443	157.86	235.761	86.4126	11302.6	0.161991	0.0740392	3.46852	1	0.7	64.7031	10.3897	30.2124	24.101	2.3197	2.18791	0.669578	683.797
171	0.00125614	5.55105	0.0293219	0.315711	0.739845	0.361242	3.10931	0.63894	5.55496	1.34017	4.37479	0.689681	5.56669	0.846372	48.1776	36.3858	122.556	40.7392	11132.2	0.19436	0.0701544	2.728	1	0.7	29.1194	5.89734	10.4043	12.8177	2.17347	2.77046	0.296892	664.304
172	0.00482498	5.47226	0.0172065	0.468928	0.787826	0.400436	3.9924	0.937601	6.95819	1.69293	5.16167	0.874238	6.48044	1.07099	64.9334	60.7144	161.823	50.8792	11484.2	0.128834	0.0422967	2.5497	1	0.7	34.3199	5.96322	13.0765	15.2803	2.56242	3.04596	0.37519	658.959
173	0.0109282	0.142799	0.0068468	0.119696	0.01	0.0638483	0.47951	0.214358	2.0933	1.0708	4.50989	0.924979	8.74796	1.59511	4.33694	1.4339	9.77463	32.8606	9134.72	0.121917	0.0208614	2.54789	1	0.7	19.99	0.280271	2.86102	16.8487	60.1159	5.84415	0.146696	658.904
174	0.01	0.210061	0.000745407	0.043294	0.0959543	0.0994988	0.826244	0.356985	4.84451	2.26092	11.5519	2.89146	31.4896	7.13736	15.0667	8.03169	38.2599	71.8532	8524.13	0.156795	0.089712	1.54013	1	0.7	61.8185	0.2641	6.22319	55.3312	209.508	1.74776	0.209924	620.948
175	0.01	0.216907	0.00386704	0.0404387	0.0838771	0.0680732	0.714107	0.394773	5.29769	2.40622	12.1362	3.2628	35.5085	8.15542	32.1955	16.8009	81.089	75.4945	8585.43	0.196001	0.149442	2.29351	1	0.7	68.2989	0.271213	6.55852	61.4692	226.645	1.31155	0.20719	650.709
176	0.00847476	0.277468	0.00621147	0.0947506	0.205345	0.181483	2.01914	0.85974	10.8252	4.58573	22.3101	5.45101	58.2726	12.6886	25.6879	18.9542	64.7755	144.283	8635.66	0.187378	0.143782	2.0489	1	0.7	117.786	0.386905	14.0909	103.308	267.012	1.30321	0.292614	642.081
177	0.00116192	0.24492	0.00298127	0.0346578	0.0960745	0.134155	1.47368	0.567965	8.19054	3.50015	18.1903	4.42083	48.4248	10.9159	28.7457	17.04	72.0974	113.011	8516.43	0.163149	0.0927927	2.16495	1	0.7	96.1982	0.283721	10.4624	85.452	301.183	1.75821	0.236346	646.276
178	0.01	0.300932	0.00183183	0.159756	0.230022	0.227818	2.58325	0.981859	13.4329	5.47166	25.5096	5.93994	63.7688	13.7482	25.1517	18.9127	61.611	163.932	8709.76	0.233621	0.148376	3.08441	1	0.7	132.367	0.47252	17.4558	114.438	242.187	1.57452	0.306969	674.17
179	0.01	0.28598	0.00295658	0.0387266	0.236336	0.149777	1.85405	0.706324	9.92847	4.34543	22.3677	5.79436	62.6188	13.9404	18.7793	12.4814	46.473	132.798	8922.07	0.244452	0.0869289	1.97706	1	0.7	122.279	0.337664	12.875	109.067	323.004	2.81209	0.268572	639.384
180	0.01	0.303121	0.01	0.0761314	0.258057	0.158034	2.27314	0.940251	12.0862	5.33778	25.7602	6.32889	68.3915	14.7491	25.582	18.1958	65.3795	165.368	9029.71	0.209418	0.121983	2.17841	1	0.7	136.682	0.399252	15.7157	120.567	301.983	1.71678	0.27831	646.75
181	0.00153181	0.161491	0.00196836	0.0214963	0.0804177	0.117167	1.21517	0.510642	7.52798	3.48557	18.472	4.67242	54.5484	13.0769	8.46479	4.41474	21.3589	110.611	9313.44	0.194913	0.0668896	1.41601	1	0.7	103.893	0.186488	9.45137	94.2554	505.424	2.91395	0.206693	614.911
182	0.01	0.136006	0.01	0.0114821	0.0805561	0.0880134	0.826081	0.345579	4.8886	1.92955	8.53847	1.77606	17.889	3.56481	6.51954	1.30355	16.3063	62.955	9121.1	0.132355	0.0319963	1.67839	1	0.7	40.0942	0.167489	6.22883	33.6979	201.195	4.13657	0.0799412	627.209
183	0.00318913	0.285539	0.00614951	0.071672	0.069852	0.129721	1.57161	0.603353	8.33048	3.66231	18.9897	4.89245	57.2576	13.0083	17.2632	9.24074	45.2981	117.192	9414.79	0.176467	0.131071	1.49933	1	0.7	108.882	0.36655	10.705	97.8103	266.841	1.34635	0.203998	619.01
184	0.01	0.224752	0.00226205	0.0219755	0.123389	0.11231	1.29367	0.526858	8.00737	3.52944	18.0511	4.44049	50.6613	11.3474	15.7913	10.6687	38.6627	110.898	9218	0.211592	0.13779	2.56244	1	0.7	98.3523	0.25899	10.0636	88.0297	339.896	1.53561	0.275944	659.351
185	0.01	0.270405	0.00114163	0.0599055	0.272568	0.127572	1.86941	0.766829	10.8932	4.34908	21.8099	5.36805	56.712	11.9574	24.8299	16.5088	62.8465	137.884	8857.34	0.204382	0.163466	1.90392	1	0.7	114.467	0.341452	13.9296	100.196	293.442	1.2503	0.262684	636.553
186	0.00335897	0.125232	0.00431571	0.0314284	0.221097	0.11271	0.961033	0.360753	4.97016	2.19784	11.1533	2.7142	30.2924	6.89279	6.54176	2.82461	16.0832	71.3557	9186.47	0.165523	0.051497	1.60789	1	0.7	60.0406	0.164335	6.62575	53.2505	324.037	3.21422	0.175625	624.073
187	0.01	0.240783	0.01	0.0127952	0.175087	0.0956417	1.18203	0.520883	7.52365	3.45483	17.5782	4.47143	49.9207	11.2504	15.3345	7.08554	38.5555	109.228	9158.41	0.183089	0.0951784	1.71691	1	0.7	96.4464	0.273578	9.49729	86.6756	316.822	1.92364	0.183775	628.877
188	0.0024083	0.39666	0.00561249	0.0748653	0.142617	0.180356	1.48238	0.52634	7.32961	3.17272	16.0982	3.95947	43.9634	9.41116	23.6144	12.2112	59.0024	99.7139	8628.05	0.258712	0.12874	2.43354	1	0.7	86.7457	0.479546	9.66131	76.6049	159.745	2.00958	0.206961	655.309
189	0.01	0.157801	0.00162175	0.0519241	0.238235	0.133193	1.31357	0.534412	7.1442	3.29491	17.0186	4.30471	46.8854	11.0715	6.68539	3.40095	17.1025	102.239	8954.56	0.152499	0.0452768	1.12008	1	0.7	92.1601	0.221347	9.36361	82.5751	373.058	3.36816	0.198857	598.492
190	0.0150068	0.22127	0.000802524	0.0513759	0.120643	0.103381	1.63592	0.645054	9.57645	4.11357	20.31	4.88592	50.0826	10.3274	8.54711	5.57859	20.9278	127.069	8843.12	0.175909	0.0847239	2.69745	1	0.7	102.089	0.288455	12.0814	89.7196	311.034	2.07626	0.266564	663.409
191	0.00325548	0.24165	0.00208857	0.0789874	0.221228	0.183303	2.47488	0.763527	10.2222	4.52812	22.2283	5.44329	60.5335	13.402	19.2132	13.0038	48.9034	137.714	8663.21	0.194718	0.150515	2.90719	1	0.7	120.326	0.325981	13.8651	106.135	325.587	1.29368	0.265907	669.389
192	0.01	0.257058	0.00373625	0.0391194	0.163423	0.156313	1.98058	0.773976	10.6588	4.36467	22.5197	5.54268	60.2242	13.394	16.914	11.511	41.9771	139.068	8271.81	0.160026	0.135752	2.23148	1	0.7	120.088	0.309914	13.7331	106.045	342.177	1.17881	0.274222	648.597
193	0.01	0.279786	0.01	0.0213283	0.192713	0.143861	1.66772	0.722848	9.89305	4.33314	20.6609	5.1053	51.8548	11.2209	11.8973	7.82537	29.3382	132.614	8796.54	0.148931	0.0587148	2.13792	1	0.7	106.116	0.321114	12.6202	93.175	290.162	2.53651	0.26673	645.316
194	0.01	0.214638	0.00338936	0.0196787	0.0579453	0.0744865	0.847872	0.30128	4.9868	2.26589	11.9381	3.1062	35.9335	8.3438	16.1848	4.57634	41.4484	71.8988	8595.63	0.233192	0.232881	1.1081	1	0.7	68.1036	0.247706	6.26838	61.5875	248.631	1.00134	0.11041	597.754
195	0.01	0.14235	0.01	0.0147368	0.0984279	0.0681081	0.517494	0.223047	2.77519	1.06568	4.27845	0.888108	8.51363	1.5523	5.28239	1.54334	13.3083	33.9945	9635.22	0.108492	0.0291824	0.65551	1	0.7	20.1575	0.177087	3.68226	16.2982	92.035	3.71771	0.115968	563.157
196	0.00242487	0.229262	0.000775953	0.0360329	0.168053	0.0987108	1.36795	0.556648	8.10657	3.6456	18.437	4.85341	52.3096	11.7358	11.7503	7.93821	28.6984	115.752	8537.91	0.196152	0.0967847	1.35741	1	0.7	101.548	0.268495	10.2979	90.9815	338.857	2.02669	0.276608	611.906
197	0.00194779	0.107582	0.00125272	0.029223	0.179536	0.149364	1.67155	0.568692	6.85231	2.51061	10.6687	2.32264	22.0275	4.30884	4.59161	1.06842	12.0675	81.5956	10614.3	0.12506	0.0229047	1.26088	1	0.7	51.3998	0.140006	9.42144	41.8383	298.833	5.46001	0.0885369	606.708
198	0.00568922	0.138565	0.000911007	0.0952603	0.218013	0.137963	1.31943	0.481527	6.21777	2.31735	11.1452	2.80965	30.1751	6.28127	5.70094	6.72786	14.3942	76.5667	9555.15	0.236376	0.0471294	1.51278	1	0.7	61.3437	0.240425	8.3747	52.7286	219.314	5.01547	0.467401	619.653
199	0.0180249	0.739673	0.0156605	0.174793	0.43891	0.309268	2.78651	1.19604	16.6093	8.14496	46.5533	12.7643	156.215	37.9217	20.7722	11.5073	51.1405	271.427	8956.46	0.16577	0.0742684	3.8006	1	0.7	283.887	0.948151	21.3401	261.599	275.905	2.23204	0.225013	691.433
200	0.01	0.577983	0.00153398	0.0356152	0.24077	0.217519	2.11894	0.970546	14.6043	7.31547	42.6398	11.9413	147.788	36.6363	20.0129	6.61514	50.5995	242.834	8582.32	0.183539	0.0843004	1.07261	1	0.7	265.098	0.625132	18.152	246.321	394.03	2.1772	0.130735	595.525
201	0.331896	2.18162	0.14062	1.1306	0.716674	0.343614	3.12112	0.98131	13.1788	5.97904	32.4029	8.72918	104.632	25.6466	11.973	3.41191	29.5013	191.024	8506.26	0.192016	0.0433398	2.00005	1	0.7	199.516	3.78474	18.3415	177.389	46.8697	4.43047	0.115653	640.256
202	0.01	0.594732	0.0017275	0.100311	0.329437	0.282911	2.95641	1.02759	16.0373	7.58479	43.6887	12.2204	142.033	35.2412	22.9865	6.66112	56.1613	259.962	9150.64	0.188857	0.0890463	1.81248	1	0.7	262.109	0.70677	20.6336	240.768	340.66	2.12088	0.118607	632.882
203	0.01	0.530253	0.00633167	0.0643461	0.140096	0.211991	1.43329	0.765658	11.6831	6.15765	34.7755	10.133	126.017	31.6485	14.4962	3.81053	37.0163	202.182	9024.92	0.15934	0.0735738	2.15431	1	0.7	223.577	0.610931	14.2341	208.731	341.661	2.16571	0.102942	645.899
204	0.00327191	0.531369	0.00420057	0.0549251	0.263591	0.289705	2.17784	0.945966	14.1838	7.14183	42.1695	11.7089	141.741	33.2857	30.3063	35.4988	72.9943	243.152	8703.94	0.233593	0.100549	2.22402	1	0.7	254.502	0.593766	17.8609	236.047	397.542	2.32317	0.486323	648.339
205	0.01	0.544089	0.01	0.00939089	0.161072	0.119306	1.33595	0.539862	8.85337	4.14822	24.0521	6.82069	82.8796	20.4829	19.565	5.71071	52.8462	139.734	8747.93	0.186757	0.0877537	1.84274	1	0.7	149.967	0.57348	11.0096	138.384	241.305	2.12819	0.108063	634.114
206	0.0948636	0.705298	0.0501626	0.328548	0.248549	0.164171	2.15817	0.896912	13.2546	6.4231	37.4991	10.2556	126.667	31.1743	14.8017	3.54488	38.0324	214.749	8644.58	0.188386	0.0956863	1.70751	1	0.7	229.92	1.17887	16.7224	212.019	179.849	1.96878	0.0932068	628.473
207	8.44337	23.9461	1.6992	7.5613	1.35206	0.32183	2.65003	0.674393	8.22112	3.72229	20.5681	5.62312	67.3329	16.383	15.3067	3.77547	37.8872	125.181	7826.84	0.168243	0.0725614	2.29982	1	0.7	168.499	41.65	13.2194	113.629	2.7282	2.31863	0.0996504	650.921
208	0.0150817	0.398014	0.00483963	0.0846867	0.130877	0.130229	1.22381	0.517261	7.62116	4.1458	23.4667	6.68957	83.7131	20.3892	16.2227	2.83424	43.4548	139.245	9327.98	0.138723	0.0830153	3.67434	1	0.7	148.53	0.502622	9.62333	138.404	275.365	1.67105	0.0652227	688.597
209	0.00610825	0.736656	0.00261397	0.0990306	0.282873	0.252006	2.42485	1.14452	18.1434	8.88686	52.3586	14.6876	182.092	44.968	20.43	6.89129	54.2742	297.134	8682.01	0.213472	0.0593146	2.55068	1	0.7	326.085	0.844409	22.2477	302.993	358.822	3.59897	0.126972	658.99
210	0.0124481	0.504395	0.000724832	0.109405	0.217472	0.166944	1.78712	0.785287	12.9515	6.40557	37.4411	10.8836	133.044	34.1548	14.5941	3.89275	37.3707	212.158	8822.68	0.13704	0.0623233	1.43828	1	0.7	238.465	0.626973	15.9084	221.929	353.969	2.19886	0.104166	616.026
211	0.01	0.490851	0.00478862	0.0838261	0.153746	0.166708	1.63046	0.777539	12.4452	6.28805	36.5769	10.4913	129.375	32.7069	12.3982	3.92299	33.5859	204.708	9251.6	0.162201	0.0459135	1.63666	1	0.7	231.201	0.589465	15.1736	215.438	365.481	3.53274	0.116804	625.366
212	0.0151859	1.82397	0.0168374	0.179538	0.46298	0.239589	3.13577	1.19303	16.3016	7.27478	41.7625	11.2224	133.379	30.5155	56.5769	34.3014	133.56	246.306	7253.46	0.214745	0.104714	1.54876	1	0.7	247.523	2.03553	21.333	224.154	110.121	2.05076	0.256824	621.352
213	0.301171	5.32344	0.326173	2.50085	1.4097	0.658132	4.0954	1.14299	15.3132	7.20718	39.8526	10.7375	123.397	28.2772	71.9678	36.5274	178.494	245.658	7920.3	0.199755	0.0907144	2.21121	1	0.7	240.543	8.45163	22.6194	209.472	24.7848	2.20202	0.204643	647.896
214	0.01	1.40841	0.000929117	0.0431863	0.125234	0.0701093	1.48968	0.582856	8.35105	3.9468	21.5031	6.00599	69.4771	16.0005	40.8064	30.0116	97.8451	126.802	8123.07	0.16305	0.0806651	1.58677	1	0.7	129.015	1.46252	10.6189	116.933	79.9533	2.02132	0.306726	623.111
215	0.00140444	0.928282	0.00181738	0.047511	0.122527	0.104507	1.3806	0.57894	8.82404	4.313	23.3445	6.61368	77.7244	18.1739	32.7835	17.6041	85.3082	136.781	9319.38	0.212736	0.17073	1.51856	1	0.7	142.159	0.979015	11.0106	130.17	132.96	1.24604	0.206359	619.929
216	0.00239811	1.69807	0.00543037	0.153225	0.240618	0.182757	2.12099	0.980667	14.6216	6.64201	36.0499	9.67133	108.527	24.5984	79.2509	48.2051	193.338	216.167	8266.67	0.162949	0.100323	1.248	1	0.7	205.494	1.85912	18.1466	185.489	99.7721	1.62424	0.249331	605.99
217	0.01	1.33904	0.000683188	0.0357122	0.147503	0.0937844	0.986094	0.434307	6.43662	3.02157	16.9222	4.8551	57.9097	13.3633	39.9661	25.8286	100.593	102.078	8054.36	0.158938	0.105021	1.91516	1	0.7	105.556	1.38543	8.09831	96.0719	69.3443	1.51339	0.256765	636.994
218	0.0895761	2.16257	0.0466445	0.288349	0.365652	0.185623	2.0401	0.905963	12.5811	5.84843	31.2007	8.60504	100.537	22.4786	80.9649	42.1745	203.964	188.457	7699.47	0.151796	0.0761461	2.69131	1	0.7	187.335	2.58714	16.0784	168.67	65.1955	1.99349	0.206775	663.228
219	0.00879976	1.39951	0.00487767	0.0377659	0.142698	0.0738984	1.04752	0.513282	7.77865	3.83193	21.2741	6.00465	71.4233	16.1631	69.6522	30.459	181.036	125.167	8486.77	0.187895	0.0987572	1.71899	1	0.7	129.704	1.45096	9.55605	118.697	81.8061	1.90259	0.168248	628.966
220	0.01	1.45033	0.00671172	0.046764	0.217582	0.151908	1.52058	0.659879	9.64336	4.71238	25.1589	6.70437	79.2456	17.955	36.8514	26.598	88.6627	145.272	8672.92	0.240926	0.194442	1.47267	1	0.7	147.483	1.5138	12.1933	133.776	88.3709	1.23906	0.299991	617.72
221	0.00307944	1.85749	0.00796423	0.132942	0.275703	0.155141	1.98642	0.901267	13.8596	6.49015	35.3566	9.50355	110.47	25.3051	86.4642	45.5958	216.203	212.158	7687.68	0.178711	0.0877496	1.34343	1	0.7	206.305	2.00148	17.1781	187.125	93.4934	2.0366	0.210893	611.173
222	0.0136619	1.34773	0.010098	0.0733043	0.221511	0.142839	1.44604	0.526388	7.37546	3.6013	20.1074	5.64144	66.706	16.1183	30.4745	23.2872	80.7808	120.421	8273.24	0.193699	0.102186	2.85849	1	0.7	123.332	1.4448	9.71224	112.174	77.6403	1.89557	0.288276	668.034
223	0.00520883	1.55352	0.0190985	0.855043	1.78737	1.08372	4.059	1.27467	14.5812	5.5232	28.4117	7.14557	82.5407	17.9938	35.2157	35.5377	86.6832	172.413	8440.37	0.493066	0.314131	1.68792	1	0.7	166.834	2.43287	22.786	141.615	58.209	1.56962	0.409972	627.625
224	0.00137485	1.52271	0.010675	0.108613	0.160937	0.211271	1.99892	0.803285	12.1521	5.81443	31.7649	8.62971	100.127	22.2114	53.4414	47.9036	133.111	188.275	7900.2	0.214085	0.165046	1.41067	1	0.7	185.518	1.64337	15.3265	168.548	102.562	1.29712	0.359878	614.642
225	0.0175331	1.4447	0.0061064	0.0607974	0.123615	0.119751	1.16017	0.492695	8.00278	3.72994	21.3607	5.80354	67.2408	15.5894	42.2652	35.3268	103.992	123.294	8138.47	0.184938	0.115595	1.9466	1	0.7	125.152	1.52914	9.89901	113.724	74.3715	1.59988	0.339708	638.216
226	0.0304206	0.242669	0.00985501	0.133742	0.122988	0.0548894	0.458299	0.169753	2.89227	1.43285	7.90851	1.97759	24.2618	6.17845	92.9917	53.4565	225.36	44.897	6090.27	0.124576	0.0627249	0.832212	1	0.7	45.8741	0.416688	3.6982	41.7592	100.217	1.98606	0.237205	578.538
227	0.106438	0.696028	0.0753401	0.349089	0.295448	0.135124	0.520836	0.208865	2.96083	1.37209	6.80946	1.79964	21.5152	4.90383	96.5605	65.8679	232.419	43.1357	6269.95	0.140845	0.078277	1.82977	1	0.7	41.7482	1.22689	4.1211	36.4002	29.6686	1.79932	0.283402	633.588
228	0.01	0.116826	0.01	0.0315185	0.0921532	0.0201169	0.227652	0.116909	2.4073	1.17303	5.54102	1.40084	16.4309	3.8091	96.403	59.9888	223.85	32.8468	6909.77	0.135378	0.0871182	1.15477	1	0.7	31.3874	0.168345	2.86413	28.3549	168.434	1.55396	0.267986	600.594
229	0.01	0.116931	0.00295086	0.00572195	0.00668938	0.0200838	0.246435	0.130306	1.68041	0.887601	4.92923	1.28515	15.7573	3.87691	92.3171	59.2849	226.524	29.2903	6428.66	0.181314	0.123582	2.25844	1	0.7	28.9558	0.135604	2.08392	26.7362	197.164	1.46716	0.261716	649.521
230	0.032576	0.374723	0.0267231	0.147282	0.0764973	0.0730951	0.624326	0.228688	3.52804	1.47051	7.72797	2.0635	23.657	5.41043	119.596	95.2627	281.638	47.6259	6732.84	0.164732	0.124363	1.95921	1	0.7	45.4414	0.581304	4.53065	40.3294	69.3776	1.32461	0.338245	638.701
231	0.0681535	0.424583	0.0162596	0.229738	0.0631479	0.0689764	0.515623	0.254133	3.28483	1.47478	7.58366	1.96593	20.1872	4.85661	134.578	91.5306	299.536	47.5063	5804.97	0.172001	0.0910192	0.8077	1	0.7	40.9936	0.738734	4.18671	36.0682	48.8243	1.88972	0.305574	576.581
232	0.0140651	0.153344	0.0136607	0.0741825	0.0618775	0.0405629	0.5218	0.206605	3.16298	1.66411	9.03419	2.49646	30.0386	7.41791	104.95	58.617	260.042	54.4922	6251.56	0.105055	0.0677086	1.51234	1	0.7	54.9003	0.255252	3.99382	50.6512	198.436	1.55158	0.225413	619.633
233	0.0520507	0.276831	0.00518145	0.0904752	0.0351396	0.0672857	0.48293	0.247162	3.14407	1.39853	7.54931	2.01001	24.522	5.28364	96.0608	69.5169	245.001	45.3244	6545.16	0.160395	0.104089	0.83939	1	0.7	45.1646	0.424539	3.97658	40.7635	96.0183	1.54094	0.283741	579.102
234	0.966459	1.9378	0.24838	1.01708	0.381819	0.581292	0.994072	0.298754	3.9722	1.71264	7.71395	2.1157	21.6547	4.909	120.836	103.611	297.3	51.2317	6966.97	0.163871	0.105879	1.94227	1	0.7	48.5038	4.16972	6.22814	38.106	9.13875	1.54773	0.348505	638.048
235	0.00670481	0.141227	0.00144585	0	0.0391977	0.0134095	0.22098	0.126338	1.80052	0.881411	4.74083	1.14161	14.3379	3.06217	102.628	73.2129	258.109	27.3207	6450.43	0.156588	0.123432	2.03534	1	0.7	26.5138	0.149378	2.20044	24.164	161.764	1.26862	0.283651	641.578
236	0.01	0.141821	0.00161371	0.0187885	0.0328012	0.022448	0.347266	0.148309	2.12502	1.02859	5.5234	1.42902	16.3743	3.74487	111.441	79.0456	272.224	32.0873	6432.93	0.162253	0.130463	1.39977	1	0.7	30.9482	0.172224	2.67585	28.1001	163.161	1.24367	0.29037	614.089
237	0.01	0.0937227	0.01	0	0.0121928	0.0076401	0.0876701	0.0659986	1.16933	0.562178	2.72019	0.809582	9.58677	2.18208	95.3498	55.6898	236.75	16.7958	6581.11	0.105172	0.0976188	1.29852	1	0.7	17.3174	0.113723	1.34283	15.8608	139.469	1.07737	0.235226	608.773
238	0.117357	1.03258	0.174221	0.62267	0.151843	1.40441	0.606508	0.199276	2.62983	1.07377	5.82522	1.54739	19.0381	3.92839	99.6994	64.3565	242.398	35.3778	6030.69	0.165962	0.12472	3.3754	1	0.7	38.3515	1.94683	4.99186	31.4129	16.1354	1.33067	0.2655	681.547
239	0.0999526	0.260132	0.0159681	0.101831	0.0514727	0.196006	0.567357	0.183339	2.74816	1.25099	6.52477	1.73328	20.4926	4.70048	109.102	80.6748	265.396	39.6574	6225.6	0.168448	0.120643	1.98208	1	0.7	38.9263	0.477884	3.74634	34.7021	72.6162	1.39625	0.303979	639.575
240	0.0317962	0.675599	0.0274119	0.0798084	0.0371002	0.0381222	0.384875	0.158359	2.54353	1.07653	5.80488	1.62925	18.3586	4.61537	92.8347	54.0107	213.044	35.1148	5873.48	0.167126	0.089456	1.12938	1	0.7	35.4613	0.814615	3.16199	31.4847	38.6498	1.86825	0.253519	599.061
241	0.19406	1.20668	0.182383	1.02021	0.599232	0.962689	1.32259	0.215951	2.0522	0.675407	3.17552	0.847016	9.09668	2.01199	94.2741	54.1491	226.517	23.0566	6089.34	0.107021	0.10147	1.62507	1	0.7	23.5626	2.60333	5.15266	15.8066	6.07169	1.05471	0.239051	624.848
242	0.027341	0.198501	0.0161248	0.0625068	0.0311762	0.126749	0.375121	0.160587	2.48626	1.12987	6.65266	1.77701	20.4527	4.88492	98.1469	59.2828	233.507	38.2588	6454.52	0.143571	0.0897286	1.7389	1	0.7	38.3815	0.304473	3.17989	34.8971	114.615	1.60005	0.25388	629.814
243	0.01	0.207182	0.0273485	0.158942	0.01	0.0253639	0.360294	0.229204	2.97406	1.33403	6.61046	1.71014	19.2875	4.24039	115.075	79.5522	263.463	41.3329	6857.68	0.149048	0.119514	1.72979	1	0.7	37.1849	0.403473	3.59892	33.1825	82.2423	1.24711	0.301948	629.427
244	0.307524	0.853922	0.150901	0.313797	0.225757	0.321169	0.433796	0.183733	2.52521	1.2155	6.07637	1.65381	19.5738	4.75654	102.5	67.8127	236.9	37.7042	5470.09	0.12032	0.0993717	0.579375	1	0.7	38.5919	1.62614	3.68967	33.2761	20.4632	1.2108	0.28625	555.416
245	0.01	0.120701	0.01	0.0337526	0.05899	0.0538937	0.187936	0.119822	1.58433	0.73271	4.64194	1.21488	14.7636	3.5869	106.713	80.4361	274.555	26.5647	5830.05	0.190112	0.161319	0.175394	1	0.7	27.1195	0.174453	2.00497	24.94	142.961	1.17848	0.292969	487.296
246	0.01	0.149959	0.00325407	0.0283472	0.0660764	0.0228702	0.421053	0.111561	2.43919	1.0312	5.72201	1.39736	17.4852	4.08615	114.896	82.5629	264.181	34.0835	5988.09	0.0868813	0.108472	1.75989	1	0.7	32.9743	0.19156	3.06075	29.722	155.158	0.800954	0.312525	630.701
247	0.0483915	0.450644	0.0700067	0.43042	0.188446	0.173735	0.643125	0.230117	3.10677	1.35862	7.55721	1.97441	22.8614	5.24501	91.6815	56.045	220.12	44.8248	6846.45	0.151355	0.0803456	1.26053	1	0.7	44.3383	0.999463	4.34219	38.9966	39.0176	1.8838	0.254612	606.689
248	0.00327526	0.0847906	0.0021119	0.0489754	0.0500471	0.0215555	0.417823	0.18181	2.68935	1.38278	7.32415	1.98385	24.2685	5.8964	95.3272	57.9348	240.582	43.4855	5957.16	0.114821	0.0685235	0.851761	1	0.7	44.3554	0.139153	3.36059	40.8556	293.602	1.67564	0.240811	580.065
249	0.0250177	0.317595	0.013055	0.1157	0.130001	0.193837	0.585759	0.265278	3.16613	1.43504	7.7706	1.96146	22.2669	5.34914	91.7434	57.32	219.834	46.5826	7048.68	0.136267	0.0997744	1.39148	1	0.7	43.5955	0.471368	4.34101	38.7832	82.2779	1.36575	0.260742	613.666
250	0.00485762	0.120396	0.00417444	0.0302298	0.0706702	0.0348655	0.360508	0.16398	2.31855	1.12319	6.07153	1.58882	17.9921	4.35874	96.5184	65.7327	219.969	34.6114	5596.13	0.151434	0.057233	1.20796	1	0.7	34.2426	0.159658	2.94858	31.1344	195.006	2.64592	0.298827	603.715
251	0.116321	0.972801	0.147915	0.87407	0.182737	0.608463	0.546696	0.129871	2.1695	0.954341	5.13835	1.42895	16.3138	4.12912	98.0319	59.5524	238.442	30.8123	6143.33	0.151969	0.0853044	1.84195	1	0.7	33.713	2.11111	3.63726	27.9646	13.2464	1.78149	0.249757	634.082
252	0.0032405	0.163457	0.0111767	0.055473	0.0432528	0.0326013	0.298829	0.135121	2.03919	0.899303	5.0786	1.40089	16.0526	4.19789	98.7055	53.8328	218.419	30.6871	5652.49	0.149025	0.074671	2.22334	1	0.7	30.4116	0.233347	2.54899	27.6293	118.404	1.99576	0.246466	648.316
253	0.0230967	0.305632	0.0372035	0.292064	0.173785	0.267184	0.469922	0.143263	1.75965	0.798884	4.15173	1.0797	13.1171	3.13294	103.007	66.0316	248.554	26.6901	6014.72	0.134323	0.107511	1.55668	1	0.7	25.7521	0.657996	2.81381	22.2803	33.8608	1.24939	0.265663	621.721
254	0.0227991	0.319788	0.0391737	0.217435	0.0664266	0.0424479	0.305293	0.128262	1.78093	0.755165	3.95886	1.10418	11.5868	2.66043	102.922	70.3903	241.557	24.0581	6219.65	0.194649	0.144224	0.875712	1	0.7	22.988	0.599195	2.32336	20.0655	33.4874	1.34963	0.291403	581.895
255	0.00344391	0.0705594	0.01	0.00642689	0.0301121	0.0144293	0.303266	0.145311	2.21606	1.01522	5.58486	1.48677	17.6111	4.27442	92.8308	59.7744	217.344	33.382	5800.77	0.162986	0.0863956	1.68381	1	0.7	32.7719	0.0904302	2.70918	29.9723	331.441	1.88651	0.275022	627.446
256	0.0606108	0.980994	0.0505951	0.048043	0.01	0.270391	3.07532	0.908372	16.5681	6.91066	37.8203	9.70964	108.949	27.9983	44.6459	14.0531	107.49	232.604	8362.94	0.476869	0.0745264	2.95867	1	0.7	213.36	1.14024	20.8322	191.388	167.848	6.39866	0.130739	670.803
257	2.39473	11.5623	1.15451	8.56696	2.66306	4.84045	6.53103	2.15162	23.5103	9.79533	45.0511	10.4508	108.039	27.3424	49.3332	56.376	115.168	300.316	9319.73	0.496654	0.0530195	3.79115	1	0.7	264.053	23.6785	39.6965	200.678	8.47514	9.36739	0.489511	691.223
258	0.125733	1.13941	0.0642214	0.0974563	0.196305	0.133322	1.40902	0.645451	8.26367	4.37407	25.0714	6.49907	82.6177	22.3353	65.3877	48.2049	157.699	147.792	8681.92	0.477349	0.101648	2.21032	1	0.7	152.972	1.42682	10.6478	140.897	98.7493	4.69609	0.305676	647.865
259	0.126477	0.663195	0.0803086	0.697153	0.25968	0.193069	1.43317	0.655444	11.5031	5.02387	29.8075	8.33916	92.7304	25.7932	34.0554	6.98075	82.3811	172.37	8590.74	0.353206	0.111952	3.46293	1	0.7	177.306	1.56713	14.0444	161.694	103.178	3.15497	0.0847373	683.663
260	0.01	0.670972	0.0109031	0	0.0701327	0.0702333	0.815377	0.381478	5.29467	2.61876	15.263	4.2149	50.9504	13.5546	68.3591	20.9721	169.713	89.4092	8656.41	0.439944	0.176745	0.307089	1	0.7	93.9255	0.691875	6.63189	86.6017	125.17	2.48914	0.123574	517.776
261	0.01	0.727684	0.01	0.0979814	0.044409	0.0534032	1.01335	0.486481	7.20468	3.48656	22.8943	5.82504	66.0045	18.335	54.806	21.549	127.331	123.088	8959.01	0.309282	0.0891283	2.83547	1	0.7	126.193	0.845666	8.80232	116.545	137.815	3.47008	0.169236	667.386
262	0.01	0.889591	0.01	0.0275976	0.598135	0.219396	2.56671	1.18495	17.1946	7.56954	42.2439	10.6128	119.895	30.5099	59.4292	17.2864	146.235	249.591	8740.2	0.401214	0.134284	0.909329	1	0.7	233.532	0.937188	21.7638	210.831	224.961	2.98779	0.11821	584.395
263	0.01	0.718048	0.01	0.121677	0.49608	0.260715	3.77763	1.38475	19.0538	8.49448	44.7431	11.2145	127.016	31.8236	44.2668	10.5553	111.288	273.692	8854.37	0.267575	0.162518	2.55641	1	0.7	249.124	0.859725	24.973	223.291	259.724	1.64643	0.0948468	659.166
264	0.187423	0.966085	0.0130282	0.110981	0.01	0.190223	2.26115	0.943354	15.2972	6.74559	34.9327	9.64204	107.168	27.4705	58.673	28.378	151.897	217.947	9218.29	0.388827	0.168035	3.143	1	0.7	205.938	1.27752	18.7019	185.958	145.562	2.31396	0.186824	675.7
265	0.0657864	0.81219	0.0207258	0.302044	0.159261	0.355987	1.64404	0.722642	10.109	5.26854	29.074	7.97312	96.6939	25.2736	28.9501	7.67722	74.9005	176.574	9164.11	0.318983	0.0704645	1.82359	1	0.7	178.475	1.20075	12.9909	164.283	136.817	4.52686	0.102499	633.336
266	0.0049304	0.635037	0.00611049	0.175739	0.0986311	0.104971	1.51149	0.671389	9.80125	4.82001	27.5779	7.23613	86.8839	22.2247	39.857	12.0943	103.956	165.464	8974.04	0.379209	0.0808372	3.78856	1	0.7	161.752	0.821816	12.1877	148.743	180.993	4.69102	0.116341	691.165
267	0.177274	1.6528	0.128465	0.36869	0.318798	0.212198	1.8861	0.75727	11.4607	6.29321	33.449	8.8826	101.535	26.2072	71.5152	27.275	181.643	195.198	8878.58	0.489039	0.167122	0.146583	1	0.7	193.329	2.32723	14.6351	176.367	75.7839	2.92623	0.150157	478.022
268	0.01	0.637999	0.01	0	0.134942	0.0810543	1.03475	0.379425	7.1231	3.74018	19.7347	5.58488	68.1214	17.8953	38.9301	9.32638	99.6387	122.592	9203.66	0.321193	0.0888321	3.67717	1	0.7	124.488	0.657999	8.75326	115.077	174.889	3.61573	0.093602	688.661
269	0.0349363	0.332478	0.01	0.0348835	0.138149	0.0576179	1.44594	0.607803	8.55419	4.07648	22.5611	5.97025	65.3158	16.6909	43.8314	30.6763	97.9696	137.102	9918.89	0.426799	0.1451	2.59964	1	0.7	125.83	0.412297	10.8037	114.614	277.99	2.94141	0.31312	660.487
270	0.01	0.816172	0.00295958	0.0506969	0.32622	0.142051	1.66897	0.917473	14.8076	7.64287	43.7701	12.2932	145.206	34.9435	49.9953	42.3563	110.153	254.769	9997.8	0.4787	0.155592	2.14627	1	0.7	262.598	0.879828	17.8623	243.856	277.163	3.07664	0.384521	645.613
271	0.01	0.348858	0.00273922	0.0782328	0.141937	0.150333	1.62669	0.604387	8.82252	4.23599	22.3028	5.99896	65.2255	16.7141	48.7269	54.0762	108.212	136.977	8571.53	0.370028	0.122894	0.462587	1	0.7	126.263	0.43983	11.3459	114.477	260.276	3.01096	0.499723	541.665
272	0.0127693	0.378871	0.0059493	0.0509929	0.0962338	0.0714596	1.10616	0.421206	6.84596	3.34826	17.6977	4.34748	50.5408	12.7353	56.9016	48.0767	131.204	106.102	8028.29	0.313135	0.152257	3.17953	1	0.7	97.6592	0.448582	8.54102	88.6696	197.666	2.05662	0.366428	676.643
273	0.348611	4.09272	0.107803	0.342605	0.206017	0.466594	1.46027	0.635377	9.95068	4.61568	25.9327	6.54832	74.1779	19.3021	51.1115	49.049	122.984	155.184	10450.5	0.305424	0.201876	2.77667	1	0.7	148.187	4.89174	12.7189	130.577	26.6933	1.51293	0.398823	665.712
274	0.0381173	0.530372	0.0145255	0.18007	0.234095	0.0873917	1.48047	0.472016	6.70262	2.85609	14.6806	3.33289	38.1117	9.00838	59.372	35.3525	146.343	96.9336	9338.58	0.323603	0.16859	3.06866	1	0.7	77.7294	0.763085	8.97658	67.9897	89.0984	1.91946	0.241573	673.754
275	0.0675199	0.560082	0.01	0.198119	0.557647	0.109131	2.0063	0.6191	7.72661	3.77041	20.498	5.23937	57.3408	14.7126	48.1844	44.02	119.332	127.318	9474.28	0.255687	0.194633	3.16192	1	0.7	113.416	0.835721	11.0188	101.561	121.525	1.31369	0.368887	676.19
276	0.01	0.887767	0.00313417	0.0538376	0.201614	0.188757	2.96823	1.09992	17.3888	8.07044	42.5479	10.7487	122.891	28.7043	48.1451	44.7411	114.634	253.067	9865.51	0.290946	0.110436	0.643796	1	0.7	235.764	0.954739	21.8473	212.962	223.058	2.63451	0.390296	562.018
277	0.01	0.299664	0.01	0.0272746	0.183587	0.172151	1.5125	0.465787	7.2194	3.71142	18.8261	5.01685	53.6493	13.4687	38.7581	30.6282	90.392	115.051	9437.66	0.277272	0.171399	3.57436	1	0.7	104.573	0.346938	9.55342	94.6724	272.88	1.6177	0.338838	686.294
278	0.01	0.382785	0.01	0.0283208	0.158778	0.0594548	0.974757	0.461533	7.17546	3.42161	19.0063	4.48857	53.5884	13.4027	36.8511	31.236	83.4708	107.043	9899.91	0.256049	0.0976253	2.67021	1	0.7	103.169	0.431106	8.82999	93.9076	217.829	2.62277	0.374215	662.604
279	0.01	0.522115	0.00316174	0.108479	0.243293	0.200429	1.92098	0.467927	4.72614	1.64127	6.84167	1.53981	14.7296	3.30906	46.383	36.7299	111.538	51.8668	11730.4	0.385896	0.115495	3.09745	1	0.7	36.264	0.643756	7.55877	28.0614	43.5902	3.34123	0.329304	674.513
280	0.01	0.305602	0.01	0.0162582	0.145858	0.0192288	0.778711	0.429693	5.83137	2.91188	16.1371	4.33231	46.903	12.1304	44.0918	36.1327	103.929	95.172	9456.2	0.289063	0.153649	1.85273	1	0.7	89.9614	0.341861	7.20486	82.4147	241.077	1.88132	0.347665	634.517
281	0.00408846	0.950558	0.0200705	0.311168	0.477585	0.235077	2.65461	1.03816	14.0088	5.63262	28.2665	6.55906	70.2533	15.3101	53.5317	52.1554	125.184	182.74	8470.5	0.326364	0.181604	4.00668	1	0.7	145.722	1.28588	18.4142	126.022	98.0038	1.79712	0.416631	695.898
282	0.01	0.332176	0.0153644	0	0.0984006	0.111423	0.842452	0.391836	6.41803	3.12249	16.7419	4.34417	50.6311	12.76	41.804	35.9864	98.0097	100.373	9508	0.233308	0.173175	2.64192	1	0.7	95.8194	0.35754	7.86214	87.5997	245.006	1.34724	0.367171	661.761
283	0.01	3.19	0.05	0.05	0.22	0.1	2.41	1.64	30.5	16.2	94.4	25.6	291	56.8	19.3	34.6	531	534	13976	44.3	20.9	0.63	1	1	522.17	3.3	34.87	484	146.667	2.11962	0.0651601	538.805
284	0.06	0.86	0	0	0.4	0	1.05	1.1	25.3	15	95	27.5	318	66.2	12.6	4.13	348	519	12252	39.1	10.9	3.17	1	1	550.47	0.92	27.85	521.7	567.065	3.58716	0.0118678	648.166
285	0.08	6.45	0.03	0.66	0.78	0.06	4.74	2.67	43	22.2	137	40.5	518	113	108	24.5	2861	547	17987	217	207	1.36	1	1	889.17	7.22	51.25	830.7	115.055	1.04831	0.00856344	587.457
286	0.1	2.4	0.13	0.96	1.03	0.1	2.14	1.77	36.6	20.3	126	35.9	437	89.5	23.6	10.3	621	694	14307	59.6	27.5	1.21	1	1	753.93	3.59	41.64	708.7	197.409	2.16727	0.0165862	579.696
287	3.81	6.36	3.62	24.6	21.6	1.23	56.4	16.3	165	58.9	282	67.6	707	130	38.8	28.1	1034	1903	14916	132	65.5	3.53	1	1	1544.42	38.39	260.53	1245.5	32.4433	2.01527	0.027176	656.501
288	0.25	2.57	0.16	0.8	0.4	0.02	4.78	3.06	60.5	33.8	199	54.1	591	106	30.9	9.77	859	1104	14280	111	47.5	2.28	1	1	1056.44	3.78	68.76	983.9	260.291	2.33684	0.0113737	623.533
289	0.2	6.53	0.08	0.88	0.69	0.01	4.11	2.55	44.1	22.6	137	40.8	528	117	117	46.1	2972	654	16711	198	159	3.24	1	1	904.55	7.69	51.46	845.4	109.935	1.24528	0.0155114	649.846
290	0.67	6.17	0.5	3.44	3.55	0.28	10.9	4.02	50.1	21.6	118	31.5	367	77.2	45.7	47.1	938	654	13669	80.9	61.4	0.46	1	1	694.93	10.78	68.85	615.3	57.0779	1.31759	0.0502132	520.469
291	0	3.87	0.03	0.69	0	0.16	4.87	3.04	59.2	30.1	170	45	487	89.6	36.9	23.7	1038	962	15730	88.9	43.7	4.85	1	1	893.56	4.59	67.27	821.7	179.02	2.03432	0.0228324	682.025
292	0	1.9	0	0.22	0	0	2.11	1.29	25.3	13.4	91.8	29.1	392	98	95.4	22.5	2514	506	17500	149	93	3.34	1	1	655.12	2.12	28.7	624.3	294.481	1.60215	0.00894988	652.195
293	0	1.45	0.11	0.46	0.23	0	2.79	1.23	28.3	15.8	101	28.2	340	72.5	18	6.51	424	548	11771	41.2	11.6	1.06	1	1	592.07	2.02	32.55	557.5	275.99	3.55172	0.0153538	571.074
294	0	17.5	0.11	1.35	4.26	0.45	19.3	6.33	75	28.9	128	25.9	241	50.5	8.72	37	60.6	802	8418	2.9	0.83	5.83	1	1	598.6	18.96	105.34	474.3	25.0158	3.49398	0.610561	697.462
295	0.03	6.48	0.03	0.07	1.08	0.12	7.72	3.26	46.1	19.5	100	23.8	249	55.4	22.87	21.4	314	588	13882	9.11	7.03	4.43	1	1	512.59	6.61	58.28	447.7	67.7307	1.29587	0.0681529	674.606
296	0	0.19	0	0	0	0	0.6	0.43	12.8	8.88	61.4	17.8	199	44.9	3.179	0.43	83.6	335	15467	6.49	5.01	0.9	1	1	346	0.19	13.83	331.98	1747.26	1.29541	0.00514354	560.653
297	0	34.5	0.16	4.02	11	1.31	72.6	24.6	290	108	447	85	694	129	25.67	115	166	2879	6404	6.96	1.51	1.74	1	1	1901.19	38.68	399.51	1463	37.8232	4.60927	0.692771	604.291
298	0.02	24.4	0.05	2.6	4	0.56	26.5	9.24	113	44.6	202	41.2	382	77	16.95	64.8	126	1245	10644	5.5	1.54	3.08	1	1	927.17	27.07	153.3	746.8	27.5877	3.57143	0.514286	645.959
299	0	20.1	0.19	3.64	8.14	0.36	46.8	15.5	184	68.8	300	60.4	535	101	59.3	155	198	1945	13107	4.32	1.95	5.82	1	1	1343.93	23.93	254.8	1065.2	44.5132	2.21538	0.782828	697.316
300	0	0.48	0.04	0.2	0.01	0.02	0.79	0.72	13.4	7.91	48	12.9	153	36.8	14.497	2.06	411	293	16758	5.96	4.09	2.21	1	1	274.27	0.72	14.94	258.61	359.181	1.45721	0.00501217	621.27
301	0	26.2	0.16	2.71	8.8	1.66	60.6	21.7	269	99.7	424	79.5	667	122	33.9	106	317	2580	10867	9.94	3.15	3.32	1	1	1783.03	29.07	361.76	1392.2	47.8913	3.15556	0.334385	651.73
302	0.14	1.88	0.02	0.08	0.26	0.07	2.16	1.73	36.7	19.1	102	22.8	220	46	33.9	106	317	668	17870	29.9	19.3	4.36	1	1	452.94	2.12	40.92	409.9	193.349	1.54922	0.334385	673.313
303	0	7.65	0.13	1.98	4.52	0.47	24.4	8.73	107	42.2	187	38.1	349	71.3	33.9	106	317	1153	11879	4.76	2.45	4.04	1	1	842.48	9.76	145.12	687.6	70.4508	1.94286	0.334385	667.175
304	0.08	4.57	0	0.39	0.54	0.33	6.47	4.35	79.5	42.8	259	70.5	822	208	33.9	106	317	1507	16659	29.9	20	3.6	1	1	1498.53	5.04	91.19	1402.3	278.234	1.495	0.334385	658.039
305	0	4.48	0	0.1	0.84	0.11	2.22	1.2	20.8	10.3	61.5	15.9	180	44.9	33.9	106	317	373	15162	7.84	4.04	0.8	1	1	342.35	4.58	25.17	312.6	68.2533	1.94059	0.334385	553.309
306	0.06	23	0.05	2.46	6.4	0.41	35.7	10.9	134	51.2	222	44.1	394	78.5	33.9	106	317	1401	8175	5.71	1.15	4.55	1	1	1002.78	25.57	187.41	789.8	30.8878	4.96522	0.334385	676.783
307	0.02	0.24	0	0.11	0	0.11	0.53	0.26	7.4	4.76	35.6	11.3	151	41.7	33.9	106	317	189	18313	5.06	3.4	1.9	1	1	253.03	0.37	8.3	244.36	660.432	1.48824	0.334385	610.462
308	0	21.4	0.58	8.46	15.2	1.77	87.6	27.6	312	116	487	94.7	821	159	33.9	106	317	3220	8290	4.76	1.19	1.32	1	1	2152.31	30.44	444.17	1677.7	55.115	4	0.334385	585.461
309	0.65	15.6	0.62	8.05	13.1	1.9	66.5	21	241	88.4	370	71.5	630	123	33.9	106	317	2464	8854	2.6	0.75	2.58	1	1	1651.32	24.92	343.5	1282.9	51.4807	3.46667	0.334385	632.616
310	0	16.7	0.16	2.62	5.28	0.72	27.7	9.55	116	44.9	198	40.2	356	71.1	17.3	85.3	117	1286	8869	3.77	1.05	1.96	1	1	888.93	19.48	159.25	710.2	36.4579	3.59048	0.72906	612.664
311	0.18	13.2	0.34	5.86	10.8	1.66	57.3	18.3	212	79.7	337	65.5	586	115	15.4	81.3	117	2235	8665	3.06	0.72	4.07	1	1	1502.84	19.58	300.06	1183.2	60.429	4.25	0.694872	667.767
312	0.02	41.4	0.34	5	10.1	1.15	58.6	19.4	236	91.5	411	84.2	775	153	44.5	321	314	2665	10616	4.83	1.59	4.74	1	1	1886.71	46.76	325.25	1514.7	32.3931	3.03774	1.02229	680.135
313	0	2.63	0	0	0.78	0.24	3.04	1.85	27.4	12.7	65.8	16.1	173	39.6	7.42	11.7	171	419	12308	2.8	1.12	1.86	1	1	343.14	2.63	33.31	307.2	116.806	2.5	0.0684211	608.962
314	0.07	21	0.11	2.03	4.05	0.77	25.3	9.34	115	47.4	216	46	438	89.7	20.2	86.1	135	1345	11716	2.65	0.91	0.73	1	1	1014.77	23.21	154.46	837.1	36.0664	2.91209	0.637778	547.689
315	0.03	1.95	0.08	0.24	0.05	0.18	2.9	1.26	21.9	10.1	55.5	13.6	141	30.9	12.5	52.41	334	349	12592	6.32	3.22	3.6	1	1	279.69	2.3	26.29	251.1	109.174	1.96273	0.156916	658.039
316	0.06	14	0.46	8.55	12.2	2.05	64.5	20	230	86.5	365	71.8	618	121	18.9	95.6	118	2419	8369	2.25	0.86	1.07	1	1	1614.12	23.07	328.75	1262.3	54.7161	2.61628	0.810169	571.68
317	0.54	12.4	0.66	7.45	11	2.02	54.9	17.9	207	77.2	331	64.8	571	115	24.6	80.7	177	2188	8637	2.48	0.75	1.92	1	1	1472.87	21.05	292.82	1159	55.0594	3.30667	0.455932	611.203
318	0	1.27	0.02	0.07	0.3	0.16	3.14	1.84	31.6	16.1	88.6	21.5	230	51.7	7.82	4.31	229	549	12567	9.72	3.77	1.6	1	1	446.3	1.36	37.04	407.9	299.926	2.57825	0.018821	598.487
319	0.14	12.3	0.14	3	5.29	0.93	30.9	9.76	118	44.8	199	40.3	369	74.8	18	79.6	204	1291	9495	3.74	1.13	5.95	1	1	908.36	15.58	164.88	727.9	46.7202	3.30973	0.390196	699.202
320	0.08	20.7	0.11	1.17	0.74	0.29	6.12	2.44	37.9	17.9	98.2	25	267	58.6	41.4	93.7	403	589	15193	6.23	3.67	3.99	1	1	536.25	22.06	47.49	466.7	21.1559	1.69755	0.232506	666.18
321	0.03	12.5	0.09	1.52	3.61	0.57	21.5	6.97	82.9	32.6	146	30.3	274	54.7	12	52.1	81.5	933	9023	2.73	0.88	5.23	1	1	667.29	14.14	115.55	537.6	38.0198	3.10227	0.639264	688.292
322	0.02	31.9	0.03	0.54	0.79	0.29	5.78	2.46	36.9	17.5	101	26.5	316	82.4	42.8	215	308	611	11617	4.32	1.46	2.42	1	0.5	622.11	32.49	46.22	543.4	16.7251	2.9589	0.698052	681.854
323	0	81.2	0.08	1.44	3.49	0.64	24.8	10.2	137	58.2	291	64.5	621	127	64.3	433	421	1852	11474	13.5	3.53	2.62	1	0.5	1420.55	82.72	176.13	1161.7	14.0438	3.82436	1.0285	688.452
324	0.02	7.71	0.01	0.1	0.31	0.13	4.44	2.12	31.2	15.3	89.3	24.4	302	83.5	110	92.6	3064	551	14322	14.1	10.6	2.1	1	0.5	560.54	7.84	38.2	514.5	65.625	1.33019	0.0302219	670.292
325	0.01	8.24	0.01	0.15	0.67	0.28	6.28	2.98	46.3	22.2	127	33.4	397	106	95.3	94.2	2683	774	13123	22.1	11.6	2.3	1	0.5	750.52	8.41	56.51	685.6	81.522	1.90517	0.03511	677.676
326	0.2	9.52	0.28	2.09	1.17	0.34	6.92	2.67	38.9	18.5	106	29.2	352	94.7	115	80.3	3271	660	14039	12.9	8.64	2.03	1	0.5	662.49	12.09	50	600.4	49.6609	1.49306	0.0245491	667.57
327	0.09	6.32	0.12	0.58	0.84	0.13	4.08	1.73	26.5	12.7	74.1	19.8	236	64.6	53.4	50	1546	446	13913	14.5	9.61	1.42	1	0.5	447.59	7.11	33.28	407.2	57.2714	1.50884	0.0323415	639.8
328	0.18	7.11	0.28	2.34	1.48	0.18	5.07	1.68	25.4	11.8	68.2	19	235	63	67.5	48.4	1958	425	14728	13.5	11.5	2.21	1	0.5	440.72	9.91	33.81	397	40.0605	1.17391	0.0247191	674.422
329	0	10.4	0.01	0.22	0.68	0.21	7.62	4.2	64.5	30.4	174	46.5	538	137	169	158	4768	1061	13611	32.9	27.6	2.01	1	0.5	1013.74	10.63	77.21	925.9	87.1025	1.19203	0.0331376	666.778
330	0.16	13.1	0.03	0.21	1.15	0.36	13.4	6.33	98.2	46.3	256	70.1	800	187	166	197	5081	1575	14705	43.9	20.1	1.61	1	0.5	1492.34	13.5	119.44	1359.4	100.696	2.18408	0.0387719	649.369
331	0	14.6	0.01	0.21	0.89	0.22	9.83	4.25	61.9	31.4	190	53.2	681	196	231	385	245	1163	15011	39.7	16.2	2.81	1	0.5	1243.51	14.82	77.09	1151.6	77.7058	2.45062	1.57143	694.345
332	0.01	11.3	0.02	0.13	1.02	0.2	8.59	4.06	62.6	29.9	172	46.1	548	143	176	166	5000	1032	13527	28.8	26.4	2.38	1	0.5	1026.93	11.46	76.47	939	81.9372	1.09091	0.0332	680.481
333	0.03	15.4	0.03	0.23	0.95	0.29	9.33	3.57	50.4	24.7	144	39.7	505	150	228	376	245	904	14532	20.1	13.5	1.7	1	0.5	943.63	15.69	64.54	863.4	55.0287	1.48889	1.53469	653.577
334	0.03	12.9	0	0.11	1.36	0.34	15.4	6.74	98.2	45.2	244	65.9	769	175	150	192	4642	1513	14833	29.9	15	2.44	1	0.5	1434.18	13.04	122.04	1299.1	99.6242	1.99333	0.0413615	682.534
335	1.16	60.8	0.74	7.74	7.97	2.14	35.7	10.4	119	45.3	193	41.4	385	73.7	9.81	81.8	55.6	1259	7327	1.91	0.57	2.44	1	0.5	984.05	70.44	175.21	738.4	10.4827	3.35088	1.47122	682.534
336	0.13	1.21	0.04	0.22	0.15	0.1	1.49	0.68	11.6	5.44	30.6	8.16	85.4	17.2	17.4	6.59	485	204	14591	2.36	1.12	2.39	1	0.5	162.42	1.6	14.02	146.8	91.75	2.10714	0.0135876	680.826
337	0	2.16	0	0.08	0.19	0.19	2.44	1.39	21.7	9.48	49.2	11.2	115	24.9	27	9.54	726	344	14340	2.73	1.06	0.89	1	0.5	237.93	2.24	25.91	209.78	93.6518	2.57547	0.0131405	605.878
338	0	1.13	0.02	0.05	0	0	1.84	0.87	15.9	7.99	43.6	11.7	127	24.7	23.7	8.13	671	300	15787	3.07	1.34	2.23	1	0.5	234.8	1.2	18.61	214.99	179.158	2.29104	0.0121162	675.155
339	0.01	2.37	0.01	0.03	0.15	0.11	2	1.05	16.1	7.5	41.1	10.4	109	24.7	23.5	11.7	634	273	12468	2.73	0.97	2.92	1	0.5	214.53	2.42	19.41	192.7	79.6281	2.81443	0.0184543	697.608
340	0	1.15	0.01	0.05	0.1	0.07	0.9	0.46	8.04	3.95	22.7	5.27	63.3	13.9	13.6	5.35	369	148	12699	2.08	0.77	1.44	1	0.5	119.9	1.21	9.57	109.12	90.1818	2.7013	0.0144986	640.856
341	0	0.4	0	0	0.06	0.09	1.5	1	15.3	5.86	24	4.46	35.6	6.02	17.6	1.48	470	218	12695	1.31	0.76	0.64	1	0.5	94.29	0.4	17.95	75.94	189.85	1.72368	0.00314894	583.413
342	0.01	3.55	0.01	0.04	0.18	0.14	1.67	0.58	9.54	4.18	20.5	4.49	49.9	11.7	21.7	9.11	595	146	13144	2.2	0.95	2.01	1	0.5	106.49	3.61	12.11	90.77	25.144	2.31579	0.0153109	666.778
343	0	0.56	0	0.03	0.13	0.08	1.35	0.7	10.5	4.38	18.5	3.92	35.5	6.65	12.5	2.34	338	166	13575	1.03	0.58	1.12	1	0.5	82.3	0.59	12.76	68.95	116.864	1.77586	0.00692308	622.247
344	0	2.76	0.02	0.08	0.28	0.22	3.13	1.65	24.5	11.5	57.5	14.2	146	28.1	31.9	14.9	913	411	14000	3.06	1.17	1.17	1	0.5	289.94	2.86	29.78	257.3	89.965	2.61538	0.0163198	625.426
345	0.11	2.4	0.05	0.31	0.46	0.22	3.42	1.81	28.7	13.4	73.1	17.2	179	38.2	72.9	14.2	1976	519	14611	5.89	2.43	1.67	1	0.5	358.38	2.87	34.61	320.9	111.812	2.42387	0.00718623	652.195
346	0.1	3.54	0.03	0.33	0.24	0.08	1.78	0.89	18.1	9.44	61.1	17.8	223	63.2	67.3	26.7	1896	355	16502	9.6	9.64	2.17	1	0.5	399.63	4	21.09	374.54	93.635	0.995851	0.0140823	672.941
347	0.18	7.94	0.24	1.38	1.07	0.21	4.57	1.66	25.1	11.9	70.8	20.5	265	78.5	85.4	87.6	2434	435	13701	11	4.45	1.18	1	0.5	489.05	9.74	32.61	446.7	45.8624	2.47191	0.0359901	626.048
348	0.01	0.45	0.032	0.52	0.85	1.9	20.5	4.37	22.3	3.01	7.44	0.85	6.67	1.18	12.2	3.24	275	100	12429	0.18	0.04	2.8	1	1	70.082	1.012	49.92	19.15	18.9229	4.5	0.0117818	638.731
349	0	0.16	0.0009	0	0.39	0.66	13.1	2.54	16.4	2.95	8.1	1.16	8.23	1.46	32.8	1.11	151	94.6	12495	0.11	0.03	0.92	1	1	55.1509	0.1609	33.09	21.9	136.109	3.66667	0.00735099	562.038
350	0.006	0.17	0.019	0.55	0.78	1.23	14.3	3.93	20.7	3.91	9.04	1.39	7.54	1.42	32.7	1.39	201	110	12782	0.1	0.02	0.95	1	1	64.985	0.745	40.94	23.3	31.2752	5	0.00691542	564.068
351	0	0.18	0.0098	0.09	0.72	1.01	11.4	3.15	18	3.29	8.56	1.27	8.4	1.66	1.29	1.52	200	98.5	12611	0.35	0.09	1.58	1	1	57.7398	0.2798	34.28	23.18	82.8449	3.88889	0.0076	597.623
352	0.0044	0.33	0.0034	0.062	0.45	0.9	12	3.35	16.1	2.65	6.82	0.84	6.5	1.12	29.5	3.95	520	82	12748	0.25	0.09	1.23	1	1	51.1298	0.3998	32.8	17.93	44.8474	2.77778	0.00759615	580.776
353	0	0.16	0	0	0.46	0.86	9.5	2.73	15.2	2.73	7.18	1.12	7.03	1.31	40.2	1.53	267	85.6	12322	0.29	0.08	0.75	1	1	48.28	0.16	28.75	19.37	121.062	3.625	0.00573034	549.34
354	0.018	0.16	0.028	0.22	0.71	0.69	9.18	2.99	19.1	3.46	9.32	1.58	9.76	1.68	23.8	1.55	138	111	13018	0.11	0.05	2.36	1	1	58.896	0.426	32.67	25.8	60.5634	2.2	0.0112319	626.048
355	0.035	0.7	0	0.065	1.19	1.34	16.1	4.63	28.1	4.66	12.1	1.52	10.3	1.55	50.9	6.92	790	137	12554	0.52	0.15	2.09	1	1	82.29	0.8	51.36	30.13	37.6625	3.46667	0.00875949	617.247
356	0.036	0.8	0.014	0.32	1.07	1.22	16	3.87	17.7	2.52	5.47	0.71	4.68	0.79	24.9	9.73	844	72.9	13130	0.48	0.11	3.06	1	1	55.2	1.17	39.86	14.17	12.1111	4.36364	0.0115284	645.461
357	0.094	0.93	0.087	0.27	1.24	1.59	16.5	4.26	19.8	2.66	5.98	0.67	5.23	0.8	34.2	7.95	760	74.9	12789	0.41	0.08	4.31	1	1	60.111	1.381	43.39	15.34	11.1079	5.125	0.0104605	672.379
358	0.033	1.06	0.056	0.24	1.23	1.12	15.6	3.96	18.2	2.62	5.87	0.7	4.4	0.66	38.8	8.59	793	73.8	12947	0.35	0.13	2.36	1	1	55.749	1.389	40.11	14.25	10.2592	2.69231	0.0108323	626.048
359	0.0097	0.87	0.012	0.14	0.96	1.53	18	4.03	20.6	3.42	8.51	1.08	6.65	1.01	65.1	10.8	1025	104	12843	0.35	0.1	3.69	1	1	66.8217	1.0317	45.12	20.67	20.0349	3.5	0.0105366	659.981
360	0.044	0.93	0.079	0.61	1.35	1.27	15.7	4.44	23.1	4.07	8.75	1.21	7.81	1.3	58.7	10.1	887	113	12739	0.53	0.09	2.75	1	1	70.663	1.663	45.86	23.14	13.9146	5.88889	0.0113867	637.378
361	0.12	1.11	0.083	0.76	1.07	1.51	15	4.03	23.1	3.59	9.13	1.17	7.11	1.31	34.8	8.41	965	110	12534	0.58	0.13	3.71	1	1	69.093	2.073	44.71	22.31	10.7622	4.46154	0.00871503	660.407
362	0.026	0.71	0.0006	0.036	0.96	1.36	14.8	3.92	19.7	3.23	6.79	0.9	5.71	0.95	26.8	11.3	1014	89.7	12583	0.62	0.14	2.24	1	1	59.0926	0.7726	40.74	17.58	22.7543	4.42857	0.011144	622.247
363	0	0.71	0.0009	0.094	0.88	1.4	17.4	4.64	25.5	4.49	10	1.42	9.15	1.45	50.8	8.13	950	124	12859	0.41	0.13	3.17	1	1	77.1349	0.8049	49.82	26.51	32.9358	3.15385	0.00855789	648.166
364	0.0017	0.73	0	0.13	1.3	1.59	18.2	4.56	22.4	3.62	7.98	1.03	7.11	1.59	22.5	10.6	1017	106	12524	0.48	0.1	4.47	1	1	70.2417	0.8617	48.05	21.33	24.7534	4.8	0.0104228	675.337
365	0.13	2.11	0.1	0.66	1.24	1.46	15.1	4.2	21.5	3.24	7.65	0.86	6.08	1.03	56.3	12	1140	97.5	12707	0.45	0.1	3.77	1	1	65.36	3	43.5	18.86	6.28667	4.5	0.0105263	661.674
366	0.3	1.87	0.17	1.03	1.26	1.44	17.8	5.06	20.9	3.56	8.28	1.06	6.67	0.98	52.7	10.4	960	103	12852	0.49	0.12	4	1	1	70.38	3.37	46.46	20.55	6.09792	4.08333	0.0108333	666.38
367	0.16	1.9	0.14	0.9	1.79	1.82	19.4	4.8	25.2	4.13	9.75	1.23	8.26	1.39	56	11.9	987	121	12677	0.46	0.09	3.58	1	1	80.87	3.1	53.01	24.76	7.9871	5.11111	0.0120567	657.603
368	0.013	0.64	0.01	0.12	0.66	1.05	14.2	3.97	21.5	4.07	10.8	1.57	11.4	1.78	53.7	5.4	685	120	12775	0.3	0.08	1.88	1	1	71.783	0.783	41.38	29.62	37.8289	3.75	0.00788321	609.715
369	0	0.0047	0	0.034	0.11	0.2	2.52	1.47	17.7	4.38	13.7	2.03	12.2	2	16.9	0.4	48.6	145	13414	0.46	0.084	0.38	1	1	56.3487	0.0387	22	34.31	886.563	5.47619	0.00823045	509.729
370	0	0.036	1.86	0.033	0.24	0.41	6.27	3.17	30.4	7.08	18.7	2.24	14.2	2.29	21.5	0.98	143	205	13307	0.98	0.12	2.05	1	1	86.929	1.929	40.49	44.51	23.0741	8.16667	0.00685315	615.863
371	0	0.041	0	0	0.22	0.32	5.23	2.87	36.7	11.2	35.6	4.67	31.6	4.79	29.4	1.06	67.8	350	12736	0.72	0.12	2.6	1	1	133.241	0.041	45.34	87.86	2142.93	6	0.0156342	633.19
372	0	0.056	0.0038	0	0.25	0.42	5.83	3.12	34.1	8.1	22.7	2.83	18.2	2.57	39	0.82	121	257	13292	1.25	0.13	1.47	1	1	98.1798	0.0598	43.72	54.4	909.699	9.61538	0.00677686	592.7
373	0	0.045	0	0.065	0.13	0.26	3.76	2.96	37.8	11.8	36	5.7	36.6	6.08	40.4	0.11	32.4	365	12734	0.64	0.07	1.21	1	1	141.2	0.11	44.91	96.18	874.364	9.14286	0.00339506	579.696
374	0	0.036	0.0037	0.067	0.29	0.24	4.31	2.56	33.6	9.6	28.4	3.98	26.7	4.28	57.3	0.44	72.4	298	13180	0.88	0.19	2.49	1	1	114.067	0.1067	41	72.96	683.786	4.63158	0.00607735	629.988
375	0	0.055	0.0036	0.033	0.13	0.36	5.3	3.25	31.9	8.55	23.1	3.31	19.6	3.01	12.7	1.59	95.5	262	12861	0.87	0.12	0.68	1	1	98.6016	0.0916	40.94	57.57	628.493	7.25	0.0166492	543.386
376	0	0.023	0	0.033	0.16	0.23	4.02	2.61	33.6	9.99	31.9	4.36	30.5	5.63	41.6	0.81	59.3	320	12806	0.69	0.14	1.43	1	1	123.056	0.056	40.62	82.38	1471.07	4.92857	0.0136594	590.833
377	0	0.022	0	0.065	0.22	0.31	5.11	2.96	31.7	8.8	26.6	3.81	26.6	4.19	31.2	0.57	84.1	280	12932	0.93	0.11	2.76	1	1	110.387	0.087	40.3	70	804.598	8.45455	0.00677765	637.65
378	0	0.15	0.0068	0.094	0.3	0.59	8.41	4.2	45.8	11.6	31.7	4.6	29.5	4.54	47.7	1.62	143	346	12668	0.59	0.093	1.77	1	1	141.491	0.2508	59.3	81.94	326.715	6.34409	0.0113287	605.484
379	0.0047	0.067	0	0	0.11	0.39	5.62	3.25	41.3	12.1	37.9	5.77	38.1	6.34	43.2	0.44	71	379	12204	0.62	0.09	1.84	1	1	150.952	0.0717	50.67	100.21	1397.63	6.88889	0.00619718	608.201
380	0.0047	0.038	0.016	0.07	0.099	0.31	5.2	2.88	31.8	8.19	23.2	3.1	19.7	3.03	24.6	1.77	88.8	264	12734	0.98	0.12	2.61	1	1	97.6377	0.1287	40.289	57.22	444.6	8.16667	0.0199324	633.475
381	0.0047	0.031	0	0	0.078	0.18	2.85	2.41	33.3	10.7	32.3	4.98	33.5	5.6	45.7	0.81	26.4	325	12298	0.39	0.071	0.97	1	1	125.934	0.0357	38.818	87.08	2439.22	5.49296	0.0306818	565.391
382	0	0.091	0.0037	0.2	0.13	0.59	6.77	3.59	38.4	9.78	27.4	3.72	24.8	3.78	20.6	1.19	121	285	13350	0.71	0.13	2.65	1	1	119.255	0.2947	49.48	69.48	235.765	5.46154	0.00983471	634.608
383	0	0.078	0	0.067	0.13	0.53	6.25	3.47	40.7	11	32	4.41	29.5	4.47	30.4	3.06	115	348	12513	1	0.17	2.71	1	1	132.605	0.145	51.08	81.38	561.241	5.88235	0.0266087	636.28
384	0	0.094	0.0063	0.057	0.32	0.65	8.67	5.08	65.7	20.4	67.2	10	69.7	11.5	37.6	0.97	111	637	21536	0.91	0.071	4.41	1	1	259.377	0.1573	80.42	178.8	1136.68	12.8169	0.00873874	674.238
385	0	0.12	0	0.032	0.37	0.59	9.2	4.17	42.9	10.4	29.5	3.86	24.4	3.85	40.1	1.47	150	314	12446	0.68	0.096	4.21	1	1	129.392	0.152	57.23	72.01	473.75	7.08333	0.0098	670.484
386	0	0.064	0	0.034	0.27	0.39	7.13	3.31	35.5	8.39	24.3	3.36	21.3	3.16	23.4	1.17	122	263	12817	0.66	0.14	1.65	1	1	107.208	0.098	46.6	60.51	617.449	4.71429	0.00959016	600.607
387	0	0.075	0	0.0042	0.23	0.46	6.27	3.31	38.1	10.8	31.1	4.72	30.5	4.9	15.3	0.62	104	319	12703	0.66	0.092	0.77	1	1	130.469	0.0792	48.37	82.02	1035.61	7.17391	0.00596154	550.954
388	0.0047	0.08	0	0.033	0.13	0.37	5.38	2.7	32.7	9.01	28.3	4.2	24.9	4.25	17.3	0.66	82.8	280	12586	0.52	0.073	3.12	1	1	112.058	0.1177	41.28	70.66	600.34	7.12329	0.00797101	646.946
389	0.21	0.52	0.023	0.31	0.46	0.69	10.2	5.11	46.2	10.5	27.4	4.08	22.9	3.66	61.4	3.14	180	322	12802	0.73	0.14	1.21	1	1	132.263	1.063	62.66	68.54	64.4779	5.21429	0.0174444	579.696
390	0.019	0.1	0.011	0.2	0.11	0.42	4.94	3.53	41.9	11.9	36.8	5.4	36.3	6.27	83	1.14	44.9	373	12267	0.35	0.062	1.08	1	1	147.9	0.33	50.9	96.67	292.939	5.64516	0.0253898	572.281
391	0.0073	0.031	0.0056	0	0.2	0.46	6.57	5.2	75.5	23.3	73.6	10.9	73.8	11.9	66.8	0.26	52.9	717	20197	0.97	0.17	1.7	1	1	281.474	0.0439	87.93	193.5	4407.74	5.70588	0.00491493	602.674
392	0.01	0.9	0	0.08	0	0	0.3	0.17	4.24	3.13	29.9	13.2	198	51.3	3.59	4.44	104	132	15295	3.04	2.42	0.9	1	1	301.23	0.99	4.71	295.53	298.515	1.2562	0.0426923	560.653
393	0	0.05	0.01	0	0	0.02	0.18	0.18	3.3	3.1	34.3	15.8	268	70.4	2.8	0.47	82.5	137	15778	3.55	3.13	3.24	1	1	395.34	0.06	3.68	391.6	6526.67	1.13419	0.00569697	649.846
394	0	0.08	0.01	0	0.03	0	0.33	0.15	3.75	3.23	34	15.2	254	67	2.12	0.84	61.5	142	14812	2.99	2.37	0.87	1	1	377.78	0.09	4.26	373.43	4149.22	1.2616	0.0136585	558.526
395	0	0.33	0	0	0	0.01	0.16	0.12	2.95	2.52	21.6	8.89	130	32.7	3.3	1.27	88.8	101	14417	2.08	1.72	1.54	1	1	199.28	0.33	3.24	195.71	593.061	1.2093	0.0143018	595.867
396	0	0.13	0	0.02	0.02	0.01	0.13	0.1	3.88	3.03	30.9	13.9	234	65	3.44	1.55	93.2	135	14244	3.85	3.56	3.12	1	1	351.12	0.15	4.14	346.83	2312.2	1.08146	0.0166309	646.946
397	0	0.14	0	0.04	0.02	0	0.2	0.16	4.16	3.4	33.4	14.4	226	60.9	2.64	0.57	71.9	150	13825	2.9	2.36	4.46	1	1	342.82	0.18	4.54	338.1	1878.33	1.22881	0.00792768	675.155
398	0	0.06	0	0	0	0.01	0.24	0.14	3.88	3.24	30.5	12.1	181	42.9	1.3	0.48	36.8	140	15367	2.03	1.6	2.97	1	1	274.07	0.06	4.27	269.74	4495.67	1.26875	0.0130435	643.188
399	0	0.07	0	0	0	0	0.16	0.13	3.58	2.55	23.4	9.38	137	32.8	1.71	0.44	46.9	115	13987	2.05	1.56	2.03	1	1	209.07	0.07	3.87	205.13	2930.43	1.3141	0.00938166	615.162
400	0	0.23	0	0.01	0.07	0.04	0.25	0.25	4.87	4.15	37.3	15.5	232	56.6	2.97	1.92	80.5	180	14277	2.95	2.13	3.77	1	1	351.27	0.24	5.48	345.55	1439.79	1.38498	0.0238509	661.674
401	0.01	0.96	0.01	0	0.01	0.02	0.33	0.25	4.92	3.69	36	15.5	251	66.7	4.53	8.76	108	156	15181	3.14	2.42	2.49	1	1	379.4	0.98	5.53	372.89	380.5	1.29752	0.0811111	629.988
402	0	0.29	0	0	0	0.01	0.39	0.43	7.06	4.47	38.5	16.6	270	72.4	3.44	2.18	75	166	15688	3.09	2.85	0.78	1	1	410.15	0.29	7.89	401.97	1386.1	1.08421	0.0290667	551.747
403	0	0.48	0.01	0	0.02	0	0.24	0.15	3.4	2.79	26.5	13.2	234	73.8	3.56	2.18	86.5	118	14468	3.15	3.12	1.09	1	1	354.59	0.49	3.81	350.29	714.878	1.00962	0.0252023	572.878
404	0.01	12.1	0.03	0.46	1.9	0.32	13.6	5.29	67.9	27.9	132	28.7	279	57.5	33	119	410	862	14604	3.97	1.54	2.63	1	1	626.71	12.6	89.01	525.1	41.6746	2.57792	0.290244	634.043
405	0	3.96	0.01	0.11	0.26	0.04	3.24	1.27	19.4	8.81	51.6	14.9	181	42.4	17.9	52.3	194	300	13350	5.25	3.49	2.14	1	1	327	4.08	24.21	298.71	73.2132	1.5043	0.269588	618.946
406	0.15	12.7	0.03	0.43	1.37	0.07	9.26	4.02	59.1	27	137	34.7	383	85.9	59.1	141	614	835	15693	13.7	10.3	5.49	1	1	754.73	13.31	73.82	667.6	50.1578	1.3301	0.229642	692.367
407	0.05	10.7	0.07	0.91	1.48	0.2	8.77	3.08	43.1	18.9	97.3	24.5	272	62.9	50.1	105	506	613	15189	8.32	13.6	4.72	1	1	543.96	11.73	56.63	475.6	40.5456	0.611765	0.20751	679.787
408	0	12.5	0.01	0.38	1.34	0.19	9.41	4.33	59.5	26	137	32.1	333	67.7	43.5	112	391	833	13256	8.69	4.04	1.11	1	1	683.46	12.89	74.77	595.8	46.2219	2.15099	0.286445	574.057
409	0	23.5	0.05	0.67	2.52	0.19	19.2	8.37	116	50.3	254	58.3	592	123	72.5	243	586	1600	13114	16.5	7.64	5.87	1	1	1248.1	24.22	146.28	1077.6	44.4922	2.15969	0.414676	698.046
410	0.01	16.7	0.08	1.09	3.72	0.77	26.5	9.38	120	49.9	235	51.8	499	98.4	23.3	94.4	175	1473	9902	3.73	1.42	4.21	1	1	1112.35	17.88	160.37	934.1	52.2427	2.62676	0.539429	670.484
411	0.01	29.6	0.07	1.54	3.5	1.08	24.8	8.89	110	43	201	43.9	419	83	18.9	103	130	1317	11381	3.81	1.57	3.53	1	1	969.39	31.22	148.27	789.9	25.3011	2.42675	0.792308	656.501
412	0.02	27.5	0.09	1.62	4.78	1.19	34.8	11.9	152	62.2	298	64.6	615	129	48.1	215	318	1878	9587	4.67	2.15	4.28	1	1	1402.7	29.23	204.67	1168.8	39.9863	2.17209	0.676101	671.814
413	0.06	28.1	0.13	1.54	3.58	0.9	21.1	8.06	106	45.8	228	50.3	511	107	27.3	117	168	1417	9954	6.58	2.54	2.41	1	1	1111.57	29.83	139.64	942.1	31.5823	2.59055	0.696429	627.585
414	0.11	33.4	0.31	4.95	9.52	1.46	45.1	15.4	180	68.8	312	64.9	607	118	40.1	202	221	2039	10585	3.79	1.82	3.73	1	1	1460.95	38.77	251.48	1170.7	30.196	2.08242	0.914027	660.831
415	0	0.33	0	0	0.03	0.08	0.82	0.43	6.45	3.45	18	5.24	66	16.5	5.88	1.37	166	121	15388	1.19	1.75	3.22	1	1	117.33	0.33	7.81	109.19	330.879	0.68	0.00825301	649.369
416	0.01	0.29	0	0	0.07	0.06	0.94	0.44	7.04	3.48	19.4	5.77	65	13.7	5.27	0.5	151	135	14818	1.94	1.99	3.54	1	1	116.2	0.3	8.55	107.35	357.833	0.974874	0.00331126	656.723
417	0.01	0.24	0	0.01	0.03	0	0.17	0.2	4.32	2.91	25.5	8.59	108	23.7	3.07	1.56	83.5	134	13532	1.53	1.15	4.22	1	1	173.68	0.26	4.72	168.7	648.846	1.33043	0.0186826	670.675
418	0	0.11	0	0	0	0	0.06	0.22	6.34	4.7	47.3	17.3	228	53.9	3.02	0.72	88.4	207	14127	2.65	2	2.01	1	1	357.93	0.11	6.62	351.2	3192.73	1.325	0.0081448	614.456
419	0	0.11	0	0.04	0.03	0.05	0.65	0.3	5.67	2.59	13.2	3.3	30.9	6.22	1.95	0.31	54.4	104	13490	1.68	1.65	2.63	1	1	63.06	0.15	6.7	56.21	374.733	1.01818	0.00569853	634.043
420	0.1	0.11	0.01	0	0	0	0.17	0.08	2.87	2.37	23.1	8.57	120	28.5	1.77	0.25	49.4	103	13415	2.14	1.98	1.51	1	1	185.88	0.22	3.12	182.54	829.727	1.08081	0.00506073	594.525
421	0	0.36	0.01	0	0	0.04	0.66	0.29	7.57	5.03	33.1	10.3	128	29.7	4.42	3.69	117	195	13802	2.64	1.75	3.28	1	1	215.06	0.37	8.56	206.13	557.108	1.50857	0.0315385	650.793
422	0	0.09	0	0	0.06	0.03	0.24	0.11	3.01	2.16	19.1	7.06	93.8	22.2	2.21	0.33	57.7	97.6	13775	1.45	2.27	2.33	1	1	147.86	0.09	3.45	144.32	1603.56	0.638767	0.00571924	625.113
423	0	0.25	0.01	0.07	0	0	0.47	0.28	4.42	1.17	7.36	1.47	15.4	3.09	1.61	0.39	44.2	52.7	13810	1.06	0.92	0.42	1	1	33.99	0.33	5.17	28.49	86.3333	1.15217	0.00882353	515.319
424	0	0.12	0	0	0.02	0.04	0.43	0.33	5.97	3.14	18.2	4.87	59.3	12.3	2.13	0.18	56.7	122	13918	1.26	1.67	1.87	1	1	104.72	0.12	6.79	97.81	815.083	0.754491	0.0031746	609.339
425	0	0.32	0	0	0.04	0.03	0.3	0.21	4.61	3.17	26.8	9.71	130	30.9	2.95	1.03	74	135	13389	1.68	1.49	1.75	1	1	206.09	0.32	5.19	200.58	626.812	1.12752	0.0139189	604.691
426	0	2.34	0	0.11	0.12	0.09	0.94	0.46	8.68	5.23	33.7	10.5	130	29.4	11	10	282	201	13254	3.81	2.67	3.32	1	1	221.57	2.45	10.29	208.83	85.2367	1.42697	0.035461	651.73
427	0	0.07	0.09	0.05	0	0	0.13	0.14	3.67	3.45	32.3	11.8	162	37.6	1.82	0.24	46.4	150	12783	1.47	1.55	1.32	1	1	251.3	0.21	3.94	247.15	1176.9	0.948387	0.00517241	585.461
428	0.01	26.2	0.08	1.64	2.86	0.59	18.3	6.32	83	34.1	170	38.9	384	81.8	32.2	183	268	1082	11960	6.82	2.7	4.15	1	1	847.8	27.93	111.07	708.8	25.3777	2.52593	0.682836	669.329
429	0.03	16	0.11	2.55	4.47	0.68	22.8	7.46	91.6	36.8	167	37.2	348	70.6	21.7	93.1	172	1083	11497	2.81	1.94	3.19	1	1	805.3	18.69	127.01	659.6	35.2916	1.44845	0.541279	648.649
430	0.01	24.2	0.04	1.2	2.93	0.37	19.7	7.7	99.2	41.7	202	45.7	439	92.1	39.9	163	317	1289	12138	8.32	3.98	4.78	1	1	975.85	25.45	129.9	820.5	32.2397	2.09045	0.514196	680.826
431	0.08	29.9	0.28	3.65	2.94	0.62	23.2	9.55	129	54.7	268	62.6	607	125	49.8	182	329	1707	12396	11.5	4.98	4.74	1	1	1316.52	33.91	165.31	1117.3	32.949	2.30924	0.553191	680.135
432	0.01	15	0.08	0.42	2.12	0.25	16.6	7.51	103	46	238	55.6	554	117	66.6	171	463	1458	14204	14.8	6.51	3.57	1	1	1155.59	15.51	129.48	1010.6	65.158	2.27343	0.36933	657.383
433	0.01	28.3	0.04	1.05	2.95	0.61	25	9.1	121	52.1	255	57.8	575	118	65.4	254	404	1619	12470	9.02	3.57	3.87	1	1	1245.96	29.4	158.66	1057.9	35.983	2.52661	0.628713	663.748
434	0	0.68	0	0.03	0.29	0.32	2.31	0.83	7.74	2.13	7.7	1.54	11.1	2.32	3.21	1.05	94.5	73.7	12030	0.18	0.07	1.5	1	1	36.99	0.71	11.49	24.79	34.9155	2.57143	0.0111111	594.073
435	0.01	0.76	0	0.02	0.22	0.25	2.5	0.66	7.2	1.95	8.46	2	18.4	3.93	4.6	4.14	126	68.5	12238	0.31	0.2	2.89	1	1	46.36	0.79	10.83	34.74	43.9747	1.55	0.0328571	641.118
436	0.13	0.61	0	0	0.19	0.16	1.46	0.41	4.71	1.41	4.82	1	9.87	2.2	3.2	0.62	91.5	44	12009	0.12	0.13	2.23	1	1	26.97	0.74	6.93	19.3	26.0811	0.923077	0.00677596	621.922
437	0	0.78	0.01	0.02	0.63	0.54	4.43	1.27	10.8	2.72	9.29	1.55	13.4	2.49	4.04	1.05	116	90.8	11606	0.17	0.14	2.56	1	1	47.93	0.81	17.67	29.45	36.358	1.21429	0.00905172	632.039
438	0	0.38	0	0	0.1	0.14	1.36	0.61	5.61	1.67	6.24	1.12	11.3	2.3	1.67	0.49	46.1	59.1	12512	0.28	0.25	2.9	1	1	30.83	0.38	7.82	22.63	59.5526	1.12	0.0106291	641.379
439	0	0.33	0	0.06	0.1	0.11	1.47	0.67	9.56	3.32	15.4	3.36	31.7	6.69	2.31	0.53	61.9	115	11783	0.15	0.34	2.15	1	1	72.77	0.39	11.91	60.47	155.051	0.441176	0.0085622	619.282
440	0	0.47	0	0	0.14	0.15	2.36	0.7	6.72	2.2	6.77	1.28	11.4	2.08	2.21	0.52	60.5	69	11091	0.12	0.03	3.17	1	1	34.27	0.47	10.07	23.73	50.4894	4	0.00859504	648.166
441	0	0.82	0	0.06	0.32	0.3	3.23	1.05	9.13	2.24	8.83	1.56	13.9	2.5	3.18	0.79	90.7	79.7	11737	0.15	0.11	1.71	1	1	43.94	0.88	14.03	29.03	32.9886	1.36364	0.00871003	603.082
442	0	0.47	0.01	0.19	0.25	0.23	1.82	0.65	6.66	2.2	8.97	1.86	15.7	3.03	3.14	2.15	84.1	72	12308	0.34	0.31	3.43	1	1	42.04	0.67	9.61	31.76	47.403	1.09677	0.0255648	654.26
443	0.01	0.61	0	0.08	0.23	0.19	2.05	0.56	4.98	1.38	4.62	0.88	7.58	1.28	2.91	0.53	81	48.5	11373	0.08	0.05	1.96	1	1	24.45	0.7	8.01	15.74	22.4857	1.6	0.00654321	612.664
444	0	0.45	0	0.05	0.1	0.25	2.41	0.92	8.32	2.42	9.04	1.64	13.7	2.6	2.73	0.41	75.1	83.3	11793	0.24	0.24	0.99	1	1	41.9	0.5	12	29.4	58.8	1	0.00545939	566.691
445	0	0.38	0	0.08	0.14	0.19	1.65	0.61	6.8	1.76	6.64	1.12	10.1	1.86	2.58	0.31	70.4	63.3	11417	0.2	0.18	1.67	1	1	31.33	0.46	9.39	21.48	46.6957	1.11111	0.00440341	601.44
446	0.01	0.54	0	0.13	0.23	0.21	1.83	0.63	6.32	1.79	7.15	1.24	10.6	2.21	2.28	0.5	60.8	64.4	11976	0.07	0.06	4.58	1	1	32.89	0.68	9.22	22.99	33.8088	1.16667	0.00822368	677.32
447	0	0.37	0.01	0	0.06	0.21	1.44	0.56	5.25	1.73	6.46	1.11	10.6	1.88	1.6	1.05	41.1	54.5	13092	0.27	0.17	0.79	1	1	29.68	0.38	7.52	21.78	57.3158	1.58824	0.0255474	552.532
448	0.01	36.5	0.08	1.41	3.41	0.85	22.3	7.5	97.2	36.8	163	34.3	328	65.1	48	362	357	1105	11020	7	2.27	4.26	1	1	796.46	38	131.26	627.2	16.5053	3.0837	1.01401	671.436
449	0	15.3	0.02	0.36	1.52	0.37	12	4.58	61.6	26	133	30.9	310	64.5	20	63.4	167	834	10840	4.89	1.96	3.34	1	1	660.15	15.68	80.07	564.4	35.9949	2.4949	0.379641	652.195
450	0.01	24.2	0.06	1.11	2.33	0.51	14.9	5.69	71.5	29.1	139	31.2	300	63.8	16.3	77.7	121	908	10527	3.52	1.5	4.21	1	1	683.41	25.38	94.93	563.1	22.1868	2.34667	0.642149	670.484
451	0	12.8	0.01	0.51	1.35	0.24	9.89	3.77	52.2	22.6	111	26.2	262	55.6	13.6	47.6	90.8	703	11849	2.22	1.05	3.52	1	1	558.17	13.32	67.45	477.4	35.8408	2.11429	0.524229	656.28
452	0	0.43	0	0.03	0.02	0.08	1.61	0.82	12.6	5.13	23.2	4.82	45	8.58	1.94	0.16	55.6	178	12183	2.15	0.83	2.59	1	1	102.32	0.46	15.13	86.73	188.543	2.59036	0.0028777	632.904
453	0.01	0.79	0	0	0.22	0.17	2.51	1	13.4	4.14	14.8	2.83	22.2	3.73	3.38	1.2	98.6	153	13166	1.06	0.59	3.45	1	1	65.8	0.8	17.3	47.7	59.625	1.79661	0.0121704	654.712
454	0	0.59	0	0	0.12	0.12	1.94	1.15	15.3	4.67	16	3.09	26.1	4.68	2.49	0.56	73.6	166	15037	1.84	0.93	1.42	1	1	73.76	0.59	18.63	54.54	92.4407	1.97849	0.0076087	590.359
455	0.01	1.79	0	0	0.03	0.06	0.82	0.58	9.79	4.58	24.9	5.36	56.7	13.6	4.53	1.36	105	176	14655	3.1	1.34	1.54	1	1	118.22	1.8	11.28	105.14	58.4111	2.31343	0.0129524	595.867
456	0	0.4	0	0.03	0.28	0.19	1.68	0.91	12.3	5.01	19.6	3.58	32.3	5.82	1.85	0.6	49.9	166	12444	2.31	0.56	3.3	1	1	82.1	0.43	15.36	66.31	154.209	4.125	0.012024	651.263
457	0	0.98	0	0.08	0.24	0.27	2.87	0.99	12.2	3.21	10.4	1.76	13.5	2.32	2.36	1.05	64.7	112	10935	0.24	0.11	3.1	1	1	48.82	1.06	16.57	31.19	29.4245	2.18182	0.0162287	646.454
458	0.04	1.03	0	0.02	0.35	0.26	3.52	1.63	15.8	4.49	15.7	2.55	20.7	3.28	3.38	0.77	93	159	12439	0.82	0.47	5.29	1	1	69.37	1.09	21.56	46.72	42.8624	1.74468	0.00827957	689.247
459	0	0.38	0	0	0	0.11	1.99	1.14	15.7	6.25	23.7	4.37	36.6	6.2	1.76	0.25	50.7	210	12773	2	0.67	3.24	1	1	96.44	0.38	18.94	77.12	202.947	2.98507	0.00493097	649.846
460	0	0.56	0	0	0.09	0.13	1.89	1.1	13.9	5.84	25.1	5.33	50.9	8.88	2.67	0.61	69.6	198	14053	2.51	0.81	3.97	1	1	113.72	0.56	17.11	96.05	171.518	3.09877	0.00876437	665.779
461	0	0.81	0	0	0.19	0.35	3.19	1.41	14.9	4.22	14.2	2.5	19.6	3.4	2.95	0.71	81.6	151	12720	0.72	0.48	3.03	1	1	64.77	0.81	20.04	43.92	54.2222	1.5	0.00870098	644.71
462	0.01	14.9	0.05	0.85	2.74	0.39	14.4	5.17	61.6	24.3	115	25.1	231	47.1	12.2	50	92.4	750	9156	3.92	1.13	5.61	1	1	542.61	15.81	84.3	442.5	27.9886	3.46903	0.541126	694.195
463	0.05	12.9	0.07	0.64	2.07	0.27	9.09	3.62	47	19.6	96.2	22.2	225	47.8	17.9	50.5	137	604	10213	3.29	1.44	5.94	1	1	486.51	13.66	62.05	410.8	30.0732	2.28472	0.368613	699.058
464	0	24.3	0.01	0.47	1.26	0.13	9.93	5.12	76.3	34.7	183	44.4	436	86.2	46.3	130	334	1157	14163	18.6	6.84	5.06	1	1	901.82	24.78	92.74	784.3	31.6505	2.7193	0.389222	685.537
465	0.04	20.5	0.05	1.04	2.57	0.15	15.8	6.22	81.6	33	159	34.8	332	66.7	27	93.6	179	990	11081	6.66	2.21	3.85	1	1	753.47	21.63	106.34	625.5	28.9182	3.01357	0.522905	663.337
466	0.03	32.7	0.49	8.23	13	2.22	70	23	260	98.3	430	84.9	757	146	32.8	197	191	2872	7705	3.73	0.97	5.9	1	1	1925.87	41.45	368.22	1516.2	36.579	3.84536	1.03141	698.481
467	0.47	60.5	0.34	4.33	7.67	1.64	44.6	15.8	191	73.4	325	65.1	580	110	33.8	175	201	2116	8812	9.09	2.19	3.51	1	1	1479.85	65.64	260.71	1153.5	17.5731	4.15068	0.870647	656.057
468	0	25.3	0.11	2.42	3.62	1.24	20.4	6.02	73.6	27	122	25.4	238	47.7	13	36	87.3	805	9902	5.11	2.38	2.72	1	1	592.81	27.83	104.88	460.1	16.5325	2.14706	0.412371	636.556
469	0.02	21.8	0.13	1.68	3.42	1.04	17	6.32	76.9	29.3	139	30.5	298	61.2	5.63	36.4	30.9	886	8407	1.48	0.53	5.08	1	1	686.31	23.63	104.68	558	23.614	2.79245	1.17799	685.865
470	0	54.1	0.15	2.7	6.57	0.6	41.6	15.5	195	78.3	359	75.9	711	138	67.4	290	415	2308	9272	12	3.81	5.84	1	1	1678.42	56.95	259.27	1362.2	23.9192	3.14961	0.698795	697.608
471	0	2.01	0	0.14	1.28	1.22	8.17	1.8	14.3	3.08	9.27	1.39	10.7	1.7	13.1	2.85	374	100	10112	0.12	0.03	5.56	1	1	55.06	2.15	26.77	26.14	12.1581	4	0.00762032	693.437
472	0	0.47	0	0.08	0.19	0.25	1.75	0.4	2.89	0.73	2.25	0.36	2.69	0.44	2.85	0.45	79.7	24.6	10851	0.04	0.01	0.46	1	1	12.5	0.55	5.48	6.47	11.7636	4	0.00564617	520.469
473	0	1.23	0	0	0.72	0.83	5.25	0.84	6.49	1.35	3.76	0.56	4.1	0.65	6.95	6.41	194	44.6	10893	0.1	0.02	3.8	1	1	25.78	1.23	14.13	10.42	8.47154	5	0.0330412	662.301
474	0	0.73	0	0.33	1.11	1.36	7.57	1.44	11.1	2.35	6.52	0.9	5.96	1.01	4.67	0.93	137	73.9	10233	0.11	0.02	2.24	1	1	40.38	1.06	22.58	16.74	15.7925	5.5	0.00678832	622.247
475	0	0.84	0	0.05	0.41	0.51	3.25	0.75	5.25	1.39	3.87	0.58	4.27	0.63	4.01	0.63	111	41.6	10669	0.03	0.03	2.97	1	1	21.8	0.89	10.17	10.74	12.0674	1	0.00567568	643.188
476	0	0.94	0	0.14	0.45	0.48	4.21	0.7	4.46	0.84	2.65	0.39	2.69	0.49	5.64	3.05	161	29.1	11183	0.05	0.02	5.14	1	1	18.44	1.08	10.3	7.06	6.53704	2.5	0.0189441	686.843
477	0	1.48	0	0	0.57	0.52	3.64	0.67	5.36	1.21	3.47	0.56	3.87	0.71	3.89	1.25	110	39	11297	0.07	0.03	2.16	1	1	22.06	1.48	10.76	9.82	6.63514	2.33333	0.0113636	619.616
478	0.01	0.62	0	0.06	0.42	0.38	2.12	0.48	3.99	0.88	2.89	0.43	3.53	0.59	3.47	0.78	94.6	30.6	10303	0.06	0.02	1.89	1	1	16.4	0.69	7.39	8.32	12.058	3	0.00824524	610.09
479	0	1.11	0	0.16	1.72	1.32	8.04	1.33	8.5	1.71	4.99	0.92	6.21	0.89	6.38	3.38	179	55.7	10488	0.06	0.02	2.54	1	1	36.9	1.27	20.91	14.72	11.5906	3	0.0188827	631.458
480	0	1.25	0.01	0.21	1.57	1.73	9.77	1.98	11.9	2.51	7.1	1.01	7.37	1.24	8.85	2.25	255	82.1	10534	0.09	0.03	1.72	1	1	47.65	1.47	26.95	19.23	13.0816	3	0.00882353	603.487
481	0	0.82	0	0.03	0.41	0.44	3.37	0.68	4.18	1.07	3.5	0.49	3.71	0.71	3.67	0.88	99.5	35.2	11270	0.04	0.04	3.47	1	1	19.41	0.85	9.08	9.48	11.1529	1	0.00884422	655.163
482	0	0.81	0	0.19	0.39	0.39	2.14	0.34	2.71	0.6	2.15	0.31	2.48	0.45	2.99	0.85	81.7	22.1	11503	0.08	0.04	2.03	1	1	12.96	1	5.97	5.99	5.99	2	0.0104039	615.162
483	0	1.81	0.01	0.17	0.98	1.09	5.46	1.09	7.06	1.45	3.96	0.69	4.73	0.81	6.58	2.83	188	51.9	11058	0.07	0.03	5.39	1	1	29.31	1.99	15.68	11.64	5.84925	2.33333	0.0150532	690.819
484	0.01	1.27	0.02	0.2	0.76	0.57	3.93	0.71	4.59	0.98	3.17	0.45	3.77	0.53	6.02	3.15	164	32.6	11230	0.07	0.03	4.04	1	1	20.96	1.5	10.56	8.9	5.93333	2.33333	0.0192073	667.175
485	0	1.49	0.01	0.12	1	1.01	5.95	1.41	10.3	2.2	6.47	0.92	5.61	1.07	10.3	2.25	276	68.1	9966	0.11	0.03	2.12	1	1	37.56	1.62	19.67	16.27	10.0432	3.66667	0.00815217	618.271
486	0.01	0.87	0	0.04	0.36	0.32	2.09	0.48	3.47	0.7	2.43	0.38	3.09	0.43	3.93	1.53	109	26.3	11436	0.01	0.04	2.02	1	1	14.67	0.92	6.72	7.03	7.6413	0.25	0.0140367	614.81
487	0	0.83	0.01	0.12	0.39	0.47	2.54	0.51	3.87	0.85	3.34	0.58	5.4	1	4.86	3.54	126	31.9	10739	0.08	0.03	2.57	1	1	19.91	0.96	7.78	11.17	11.6354	2.66667	0.0280952	632.328
488	0	0.61	0	0	0.08	0.14	1.25	0.3	1.82	0.44	1.44	0.24	2.12	0.35	2.43	0.67	59.5	15.8	11180	0.04	0	1.95	1	1	8.79	0.61	3.59	4.59	7.52459	0	0.0112605	612.301
489	0	0.73	0	0	0.38	0.28	2.12	0.5	3.27	0.74	2.6	0.4	2.47	0.4	3.9	1.09	100	26.3	11011	0.05	0.02	2.42	1	1	13.89	0.73	6.55	6.61	9.05479	2.5	0.0109	627.889
490	0	1.35	0.01	0.18	0.36	0.23	2.87	0.69	4.96	1.38	4.99	0.89	6.94	1.19	4.86	14.2	119	57.6	11354	0.21	0.27	1.75	1	1	26.04	1.54	9.11	15.39	9.99351	0.777778	0.119328	604.691
491	0	1.22	0.01	0.01	0.97	1.23	8.66	1.74	12.2	2.83	7.93	1.11	7.92	1.57	7.2	5.94	193	91.6	10409	0.04	0.02	4.03	1	1	47.4	1.24	24.8	21.36	17.2258	2	0.0307772	666.977
492	0.01	2.57	0.01	0.18	0.76	0.99	7.21	1.58	10.5	2.77	7.67	1.04	7.91	1.36	10.3	27	279	83.6	10494	0.18	0.03	5.87	1	1	44.56	2.77	21.04	20.75	7.49097	6	0.0967742	698.046
493	0	1.58	0	0.07	0.59	0.67	4.71	1.25	8.55	2.1	6.52	0.93	6.67	1.21	6.7	15.9	176	65.4	10254	0.11	0.02	3.64	1	1	34.85	1.65	15.77	17.43	10.5636	5.5	0.0903409	658.907
494	0	0.97	0	0.1	0.34	0.54	2.4	0.61	3.64	0.85	2.37	0.39	2.43	0.42	3.51	0.99	96.6	27.7	10690	0.14	0.04	2.16	1	1	15.06	1.07	7.53	6.46	6.03738	3.5	0.0102484	619.616
495	0	0.65	0.01	0.07	0.88	1.05	7.24	1.75	12.3	2.72	8.12	1.26	8.77	1.47	3.93	0.45	99.9	91.7	9513	0.04	0	2.34	1	1	46.29	0.73	23.22	22.34	30.6027	0	0.0045045	625.426
496	0	1.1	0.01	0.12	0.38	0.51	3.73	0.74	6.25	1.52	5	0.71	5.77	0.9	4.88	10.3	127	50.2	10568	0.09	0.02	1.21	1	1	26.74	1.23	11.61	13.9	11.3008	4.5	0.0811024	579.696
497	0	0.94	0.01	0.11	0.7	0.83	5.18	1.3	9.32	2.55	7.53	1.26	8.63	1.57	3.46	3.02	91.3	81.3	10093	0.09	0.03	1.9	1	1	39.93	1.06	17.33	21.54	20.3208	3	0.0330778	610.462
498	0	0.81	0.01	0.04	0.33	0.46	2.42	0.76	5.14	1.37	3.82	0.59	4.88	0.86	3.43	0.72	91.1	42.7	10523	0.08	0.01	3.23	1	1	21.49	0.86	9.11	11.52	13.3953	8	0.0079034	649.608
499	0	1.06	0.02	0.1	0.55	0.71	3.64	0.86	5.07	1.22	3.35	0.42	3.86	0.69	3.64	2.27	99.2	38	10246	0.12	0.03	2.64	1	1	21.55	1.18	10.83	9.54	8.08475	4	0.0228831	634.326
500	0	0.92	0	0.33	0.55	0.69	5.02	1.2	9.34	2.13	7.4	1.2	8.72	1.43	3.53	4.8	92.6	74.3	10514	0.08	0.02	2.13	1	1	38.93	1.25	16.8	20.88	16.704	4	0.0518359	618.609
501	0.02	0.7	0.02	0.13	0.31	0.34	1.73	0.32	2.36	0.65	1.96	0.29	2.3	0.41	2.04	0.47	53.6	20.1	10058	0.06	0	4.82	1	1	11.54	0.87	5.06	5.61	6.44828	0	0.00876866	681.513
502	0	0.84	0	0.1	0.4	0.46	2.43	0.56	4.48	1	3.07	0.48	3.43	0.56	3.31	0.76	88.6	31.3	10390	0.14	0.05	2.65	1	1	17.81	0.94	8.33	8.54	9.08511	2.8	0.00857788	634.608
503	0.01	0.65	0	0	0.36	0.33	2.41	0.64	4.76	1.22	4.33	0.59	4.41	0.95	3.76	4.4	98.3	41.1	11239	0.09	0.04	1.17	1	1	20.66	0.66	8.5	11.5	17.4242	2.25	0.0447609	577.489
504	0	1.12	0	0.14	1.01	0.88	5.94	1.11	8.9	1.96	5.76	0.96	7.34	1.19	4.03	1.26	107	61.9	10588	0.08	0.02	3.41	1	1	36.31	1.26	17.84	17.21	13.6587	4	0.0117757	653.805
505	0	1.34	0.01	0.09	0.62	0.58	3.45	0.82	6	1.48	4.22	0.65	5.16	0.8	5.27	3.28	140	46.1	10255	0.09	0.03	3.67	1	1	25.22	1.44	11.47	12.31	8.54861	3	0.0234286	659.553
506	0	1.83	0.01	0.15	1.09	1.34	8.15	1.55	10.9	2.58	7.45	1.14	8.71	1.44	6.88	2.35	176	79.7	10216	0.13	0.13	5.12	1	1	46.34	1.99	23.03	21.32	10.7136	1	0.0133523	686.518
507	0	1.35	0.01	0.14	0.88	0.8	5.94	1.09	7.58	1.68	4.57	0.78	5.16	0.78	5.43	1.68	153	55.8	10772	0.06	0.01	2.94	1	1	30.76	1.5	16.29	12.97	8.64667	6	0.0109804	642.417
508	0.01	1.15	0.01	0.2	0.86	1.01	6.46	1.37	11.7	2.77	9.02	1.46	10.5	1.83	5.23	3.44	119	95.1	10413	0.04	0.01	3.8	1	1	48.35	1.37	21.4	25.58	18.6715	4	0.0289076	662.301
509	0.02	2.39	0.01	0.15	0.79	1.11	6.7	1.5	12	3.07	8.48	1.34	9.46	1.67	8.13	20.3	204	93	10409	0.11	0.04	3.56	1	1	48.69	2.57	22.1	24.02	9.3463	2.75	0.0995098	657.164
510	0	1.36	0.01	0.11	0.79	0.91	5.87	1.38	10.3	2.47	6.54	1.14	8.51	1.29	5.44	1.28	137	80.3	10112	0.16	0.07	3.29	1	1	40.68	1.48	19.25	19.95	13.4797	2.28571	0.00934307	651.028
511	0.02	37.6	0.06	1.22	2.42	0.45	13.4	4.95	61.2	25.3	120	26.3	255	54.8	15	72.5	101	764	10715	4.22	1.36	4.39	1	1	602.72	38.9	82.42	481.4	12.3753	3.10294	0.717822	673.869
512	0	1.2	0.01	0.02	0.35	0.34	2.62	0.71	6.02	1.46	4.34	0.77	5.69	1	3.78	1.44	105	45.7	10707	0.1	0.03	2.36	1	1	24.53	1.23	10.04	13.26	10.7805	3.33333	0.0137143	626.048
513	0.1	1.15	0	0.02	0.51	0.59	5.78	1.64	10.7	2.05	5.67	0.88	6.75	1.14	2.51	0.54	66.3	68.8	10897	0.04	0.02	5.28	1	1	36.98	1.27	19.22	16.49	12.9843	2	0.0081448	689.089
514	0.01	0.49	0	0.05	0.15	0.19	1.18	0.43	2.93	0.84	2.39	0.42	4.27	0.72	1.79	0.42	46.9	28.5	10986	0.08	0.1	1.02	1	1	14.07	0.55	4.88	8.64	15.7091	0.8	0.00895522	568.601
515	0.01	1.21	0.01	0.13	0.39	0.42	4.5	1.09	7.13	1.65	4.44	0.65	5.09	0.81	2.57	0.8	67.4	51.5	12145	0.04	0.02	3.13	1	1	27.53	1.36	13.53	12.64	9.29412	2	0.0118694	647.191
516	0	1.05	0	0.03	0.3	0.3	2.43	0.76	5.74	1.21	3.93	0.56	4.14	0.77	3.78	1.43	101	42.3	10825	0.07	0.02	2.38	1	1	21.22	1.08	9.53	10.61	9.82407	3.5	0.0141584	626.666
517	0.01	0.94	0	0.14	0.3	0.22	2.86	0.63	5.16	1.19	3.85	0.81	6.73	1.27	4.01	0.65	102	41.4	10876	0.15	0.07	3.19	1	1	24.11	1.09	9.17	13.85	12.7064	2.14286	0.00637255	648.649
518	0	0.92	0	0.06	0.23	0.3	2.02	0.58	4.61	1.06	2.98	0.52	4.38	0.65	3.41	0.68	92.3	34	10729	0.15	0.05	3.19	1	1	18.31	0.98	7.74	9.59	9.78571	3	0.00736728	648.649
519	0.01	0.92	0.01	0	0.51	0.49	4.04	1.28	10.9	2.73	9.58	1.77	13.8	2.43	3.36	6.5	66.6	105	11543	0.19	0.23	4.89	1	1	48.47	0.94	17.22	30.31	32.2447	0.826087	0.0975976	682.703
520	0	45.8	0.03	0.83	2.23	0.52	13.8	4.91	65.9	27.3	133	29.7	287	58.6	17.2	118	146	872	10454	5.01	1.28	4.79	1	1	669.62	46.66	87.36	535.6	11.4788	3.91406	0.808219	680.998
521	0.01	14.4	0.02	0.22	0.72	0.14	3.96	1.6	21.1	9.1	47.8	11.9	130	31	20.1	45.4	198	302	11946	3.7	1.57	3.23	1	1	271.97	14.65	27.52	229.8	15.686	2.35669	0.229293	649.608
522	0	35.2	0.03	0.7	2.06	0.45	14.9	5.75	80.2	34.2	169	38.4	373	78	26.9	93.2	200	1033	11016	10.7	3.54	4.74	1	1	831.89	35.93	103.36	692.6	19.2764	3.0226	0.466	680.135
523	0.0995161	92.3762	0.639898	9.53265	12.8832	3.25566	78.331	25.0625	356.225	122.321	636.303	120.227	1421.66	230.169	274.608	625.348	665.579	4616.53	35527.5	11.7002	4.70366	2.88087	1	0.5	3109.08	102.648	475.757	2530.67	24.6538	2.48746	0.939555	696.46
524	0.00689934	0.105956	0.0132122	0	0.459135	0.0702651	1.40158	0.405932	7.7679	2.84047	11.2026	2.11836	15.0772	2.77484	0.691303	0.249466	45.8185	100.811	12590.2	2.64	1.11	2.23217	1	0.5	44.2444	0.126068	10.1048	34.0135	269.803	2.37838	0.00544465	675.234
525	0.011825	0.0681009	0	0.191159	0.250376	0	0.180167	0.10342	1.33135	0.731167	2.97017	0.772866	8.11819	1.3899	1.89314	0.433112	8.92548	29.104	13153.4	2.88	1.62	2.86935	1	0.5	16.1187	0.271085	1.86531	13.9823	51.579	1.77778	0.0485253	696.119
526	0	0.0702768	0	0	0	0	0.371841	0.349281	3.34314	1.73066	6.43667	1.5469	16.3542	2.14629	0.774191	0.213382	22.6832	58.7486	12687.5	2.24	0.77	2.36882	1	0.5	32.3492	0.0702768	4.06426	28.2147	401.48	2.90909	0.00940708	680.094
527	0.018	0.373225	0	0	0.244181	0.244453	1.75537	0.938936	9.00802	2.67145	11.595	1.92631	18.4512	2.77367	3.57023	0.436729	49.5909	98.2456	12884.9	1.09	1.88	1.16484	1	0.5	49.9998	0.391225	12.191	37.4177	95.6424	0.579787	0.00880663	625.103
528	0.02065	18.1833	0.0184245	0.760144	1.43547	0.283152	8.41112	3.29166	42.8873	19.5391	95.0424	23.7387	252.041	54.9351	189.55	339.064	384.902	601.115	14079.8	4.59814	1.68585	2.98265	1	0.5	520.587	18.9826	56.3087	445.296	23.4582	2.72749	0.880908	699.422
529	0.005465	0.132953	0	0.213997	0.291686	0.0707127	1.04791	0.584559	6.89121	1.5272	6.06585	0.692795	5.22774	0.950548	1.00901	0.139134	57.6527	62.3007	13845.5	2.06	1.28	2.17567	1	0.5	23.7026	0.352415	8.88608	14.4641	41.0429	1.60938	0.00241332	673.152
530	0	0.183659	0	0	0	0.0358156	0.796156	0.624549	5.05913	1.48756	6.14473	1.399	11.6031	2.29019	2.71788	0.422834	84.1189	51.7765	15731.7	2.33	0.85	1.65297	1	0.5	29.6239	0.183659	6.51565	22.9245	124.821	2.74118	0.00502662	651.402
531	0	0.197045	0	0	0	0.0698665	1.06772	0.460243	5.45078	2.40848	9.82897	2.98576	27.2485	4.86104	2.00504	0.632837	51.4662	87.7338	15402.3	2.15	0.61	1.61221	1	0.5	54.5784	0.197045	7.04861	47.3328	240.213	3.52459	0.0122962	649.475
532	0	0.216478	0	0	0	0.0301541	0.754092	0.350548	4.75469	1.51542	4.27668	0.688048	5.03472	0.54777	1.41415	0.122756	48.8513	44.1801	13592.8	1.17	1.24	1.39168	1	0.5	18.1686	0.216478	5.88948	12.0626	55.7222	0.943548	0.00251285	638.283
533	0.0157	0.136548	0	0.134308	0.244096	0.207114	1.39761	0.642053	6.6092	1.67127	5.24534	1.41889	10.9862	1.67692	1.31462	0.240896	65.2475	57.755	13210	1.25	2.07	2.73103	1	0.5	30.3853	0.286555	9.10008	20.9986	73.2795	0.603865	0.00369204	691.937
534	0	0.254208	0.0270114	0.321486	0	0.283282	1.57427	0.480256	8.72414	2.73555	7.81667	1.5201	12.0011	2.41864	1.56643	0.324342	69.4054	86.6074	13458.6	2.36	1.36	1.63425	1	0.5	38.1567	0.602706	11.062	26.4921	43.9552	1.73529	0.00467316	650.522
535	0.0047	0.314885	0	0	0.0974219	0.11809	1.18127	0.585734	5.85763	1.97169	5.78086	1.07781	8.2988	1.40425	1.94636	0.509582	94.9625	60.3462	14026.6	2.69	1.54	1.09001	1	0.5	26.6931	0.319585	7.84015	18.5334	57.9921	1.74675	0.00536614	620.283
536	0.0106	0.283639	0	0	0.120086	0.320238	1.45608	0.91378	8.32019	2.1281	6.06019	0.720571	6.52939	1.22692	2.0041	0.373323	123.282	71.4574	14007.4	0.85	1.22	2.68719	1	0.5	28.0898	0.294239	11.1304	16.6652	56.6381	0.696721	0.00302821	690.575
537	0	0.0809137	0	0	0	0.157795	0.365379	0.397446	4.70832	1.32167	5.68506	0.722127	4.84978	0.745264	1.23652	0.433597	55.8378	43.1836	14499.9	1.12	0.78	2.42749	1	0.5	19.0338	0.0809137	5.62894	13.3239	164.668	1.4359	0.0077653	682.109
538	0	0.0668439	0	0	0	0.152082	1.08664	0.4462	5.17425	1.3445	5.26308	1.27715	9.69134	1.90229	0.733362	0.367047	47.2836	53.1961	14621.1	1.47	0.84	1.00269	1	0.5	26.4044	0.0668439	6.85916	19.4784	291.401	1.75	0.00776267	614.292
539	0.027	53.1933	0.182891	3.54951	6.18047	1.68502	35.0302	13.0664	169.382	62.0725	290.576	65.6005	642.311	113.05	271.649	537.276	349.388	1906.41	9597.71	6.94	12.37	1.89843	1	0.5	1455.91	56.9527	225.344	1173.61	20.6068	0.561035	1.53776	662.235
540	0.0074	0.300972	0	0	0.16	0	0.716824	0.229033	5.84829	3.05778	20.5655	7.4312	90.1384	21.3097	4.59388	0.362278	70.4463	120.63	13126.9	3.41	0.77	2.41837	1	0.5	149.765	0.308372	6.95414	142.503	462.113	4.42857	0.00514262	681.799
541	0.0130144	0.103123	0	0.098	0.259517	0.0367724	0.466654	0.381034	5.26091	3.03831	13.9176	2.95672	26.2863	4.24781	1.78692	0.471685	34.0408	107.59	12393.9	0.91	1.04	1.57436	1	0.5	57.0658	0.214137	6.40488	50.4468	235.582	0.875	0.0138564	647.649
542	0.017	0.14151	0	0	0.242808	0.0688113	0.509381	0.775016	10.2332	4.63987	24.332	4.18045	56.3474	8.83234	2.7301	0.171177	36.4343	168.578	12383.5	2.17	0.88	2.94601	1	0.5	110.32	0.15851	11.8292	98.332	620.353	2.46591	0.00469823	698.365
543	0.0089	0.213437	0	0	0.09	0.031712	0.301823	0.385751	5.61148	2.81595	13.2483	3.3573	28.966	5.88237	1.09055	0.147916	30.056	106.817	12405.4	3.12	0.66	1.35771	1	0.5	60.913	0.222337	6.42076	54.2699	244.088	4.72727	0.00492136	636.429
544	0.018	0.145716	0	0.099	0.114593	0	0.20606	0.246287	5.86883	3.16133	20.1881	5.3217	69.5102	13.658	0.548353	0.21207	35.8662	123.674	13003.9	3.67	1.04	2.78079	1	0.5	118.538	0.262716	6.43577	111.839	425.704	3.52885	0.00591281	693.461
545	0.0094	0.327211	0	0.1346	0.216697	0	0.292239	0.152166	4.16165	2.33284	16.3261	4.26572	49.0388	8.82326	3.53454	1.91921	64.9955	100.86	13434.2	0.57	0.67	1.3146	1	0.5	86.0807	0.471211	4.82275	80.7867	171.445	0.850746	0.0295283	634.02
546	0.024	0.0932457	0	0.1089	0.0733296	0.0207815	0.461517	0.318325	7.94143	3.6611	17.4183	3.62043	36.0778	5.36057	3.59441	0.242332	41.2349	131.782	13555	2.41	1.24	2.66924	1	0.5	75.1797	0.226146	8.81539	66.1382	292.458	1.94355	0.00587687	690.013
547	0.00433954	0.151296	0	0	0.173067	0.0490457	0.311199	0.320394	7.29381	4.3086	19.3339	3.7026	37.5645	6.89432	1.74624	0.228768	29.9169	140.242	13034.8	2.01	0.86	2.09983	1	0.5	80.1071	0.155635	8.14751	71.8039	461.36	2.33721	0.00764679	670.286
548	0	65.1739	0.368709	2.85787	9.28716	1.33005	57.5258	19.1854	274.452	108.003	560.361	110.819	1284.05	218.475	328.134	659.791	768.519	3806.06	32061.2	6.57238	4.97251	2.83998	1	0.5	2711.89	68.4004	361.781	2281.71	33.3581	1.32174	0.858522	695.245
549	0.0154167	25.3657	0.0569626	0.214339	3.09685	0.641331	14.9887	6.14427	86.5486	35.4881	187.262	41.8997	508.197	86.0926	190.272	307.648	779.711	1319.39	42643.5	3.8905	2.47115	1.87221	1	0.5	996.012	25.6524	111.42	858.939	33.4838	1.57437	0.394567	661.136
550	1.2175	193.95	1.94736	28.0212	49.0824	8.94461	276.365	89.1107	40.8	434.455	80.1	435.242	4893.53	41.89	823.548	1802.17	1436.53	516.63	23724.2	16.4584	5.57228	2.71611	1	0.5	6574.66	225.136	464.303	5885.22	26.1407	2.95362	1.25453	691.476
551	0.0203712	2.09616	0	0.27443	0.204404	0	2.46661	0.814642	15.4546	5.08502	29.781	5.88831	68.2963	12.5763	35.0427	6.46236	585.95	247.264	39189	3.00085	1.02384	2.36202	1	0.5	142.958	2.39097	18.9403	121.627	50.8694	2.93097	0.0110289	679.857
552	0	1.43707	0	0.0872327	0.0972736	0.235496	2.18519	1.12368	17.5587	6.29278	31.28	6.13657	74.1822	12.5457	8.51896	5.49662	342.306	271.494	39518.8	1.49578	0.821049	2.81959	1	0.5	153.162	1.5243	21.2004	130.437	85.572	1.82179	0.0160576	694.634
553	0.0490206	1.4632	0	0	0.326712	0.0880427	1.98548	0.861631	11.0222	4.76236	25.2049	5.95855	72.6603	14.039	24.9311	7.55542	344.117	211.523	43283.4	1.36667	1.17333	2.37047	1	0.5	138.421	1.51222	14.2841	122.625	81.0894	1.16477	0.0219559	680.151
554	0	3.09645	0	0.107723	0.598647	0.162374	1.41115	0.748955	9.62447	4.06693	17.673	3.47871	37.5155	6.3047	16.0582	9.85032	314.848	160.147	45709.1	1.06151	0.61396	2.09425	1	0.5	84.7886	3.20417	12.5456	69.0389	21.5465	1.72895	0.0312859	670.072
555	0	0.987268	0	0	0.364638	0.632039	4.08472	2.038	24.2197	6.42415	25.6165	4.55782	43.225	6.57596	5.05812	0.803799	182.07	266.201	35995.7	0.927088	0.563913	2.60146	1	0.5	118.726	0.987268	31.3391	86.3995	87.5137	1.64403	0.00441477	687.858
556	0	1.07935	0	0.153439	0.270001	0.414238	3.41395	1.38538	17.2961	4.43932	15.4272	2.53632	21.6456	3.20665	4.55558	0.585518	178.181	172.612	36218.2	0.902438	0.402785	2.93225	1	0.5	71.2675	1.23279	22.7796	47.2551	38.3319	2.24049	0.00328608	697.966
557	0.0163811	2.39847	0	0.0697629	0.573735	0.552921	7.53055	2.24355	22.142	6.42966	25.2648	4.40115	44.3797	6.92893	18.7003	2.64588	345.026	245.359	34234.1	0.603607	0.365723	3.00157	1	0.5	122.932	2.48462	33.0427	87.4043	35.1782	1.65045	0.00766865	699.963
558	0.0133616	0.128252	0.00984989	0.0574987	0.133886	0	0.490183	0.585546	20.8606	11.2581	88.1514	25.5122	355.151	72.1244	12.3812	0.363287	90.976	518.611	44860.1	3.53303	3.44891	2.99085	1	0.5	574.476	0.208962	22.0702	552.197	2642.57	1.02439	0.00399321	699.657
559	0	0.102791	0	0	0	0.0550421	0.244185	0.383495	10.4045	6.60372	54.7388	16.7337	246.124	48.3585	2.04841	0.30175	83.5806	309.462	43245.5	4.01565	4.90795	2.58261	1	0.5	383.749	0.102791	11.0873	372.559	3624.42	0.818193	0.00361029	687.251
560	0	0.418364	0	0	0.120918	0.033101	0.661034	0.50356	16.5229	9.31372	83.1901	31.7023	583.542	152.738	4.9614	1.7219	219.447	459.716	44294.4	17.9302	15.9377	1.64124	1	0.5	878.746	0.418364	17.8415	860.486	2056.79	1.12502	0.00784652	650.851
561	0	0.557236	0	0	0	0	0.739245	0.648669	21.094	14.1367	132.835	52.4467	935.168	230.983	12.9379	4.67375	472.619	690.087	40151.6	16.722	15.3596	2.51968	1	0.5	1388.61	0.557236	22.4819	1365.57	2450.61	1.0887	0.00988904	685.197
562	0	0.0995857	0	0	0	0.0202395	0.673736	0.615986	12.7686	7.51684	58.9644	17.3065	262.146	52.738	3.18924	0.50504	102.611	344.561	42494.1	3.9874	5.18763	2.42326	1	0.5	412.85	0.0995857	14.0786	398.672	4003.3	0.768636	0.00492191	681.966
563	0.0248143	0.167301	0.0183097	0	0.124267	0.0339837	0.791934	0.581875	12.6329	8.01681	68.0842	21.3588	362.057	86.5282	13.6305	0.622552	136.484	361.991	46201.6	15.8342	22.9599	2.68138	1	0.5	560.42	0.210425	14.1649	546.045	2594.97	0.689646	0.00456136	690.394
564	0	0.769282	0	0	0.473274	0.188933	3.18525	1.42794	26.3397	9.54011	40.3547	7.98552	80.4686	13.4442	4.25362	1.12493	173.989	378.229	38075	2.92442	2.59128	2.30239	1	0.5	184.178	0.769282	31.6151	151.793	197.318	1.12856	0.00646551	677.761
565	0	0.0725027	0	0	0.151722	0.0201803	0.794332	0.801219	15.9378	7.3633	36.1731	8.44773	88.8656	14.0974	12.7404	0.556371	129.778	318.126	32168.4	4.4815	1.41999	2.26778	1	0.5	172.725	0.0725027	17.7052	154.947	2137.12	3.15601	0.00428711	676.523
566	0.025	9.03	0.049	0.8	1.69	0.14	9.98	3.89	50.1	19.7	98.6	23.6	242	50.3	220	69.9	359	638	12464	4.33	2.085	0.83	1	1	509.904	9.904	65.8	434.2	43.8409	2.07674	0.194708	555.59
567	0.092	50.3	0.47	7.49	11.2	2.75	44.8	13	148	53.4	251	54.9	552	114	308	819	761	1826	9176	3.98	1.649	4.15	1	1	1303.4	58.352	219.75	1025.3	17.5709	2.41358	1.07622	669.329
568	2.22	70.4	1.87	20.5	23.2	5.39	86.1	24.9	259	91.1	405	83.8	800	162	374	1091	778	2966	9852	4.08	1.317	3.9	1	1	2035.48	94.99	398.59	1541.9	16.2322	3.09795	1.40231	664.362
569	4.29	21.4	1.73	9.49	6.77	0.95	25.4	8.25	90.6	34	153	31.5	295	58.1	125	85.8	169	1044	10207	1.17	0.584	1.95	1	1	740.48	36.91	131.97	571.6	15.4863	2.00342	0.507692	612.301
570	2.16	22	1.81	18.8	15.8	2.66	48.1	13.2	135	47.2	210	43.7	421	86.9	113	381	744	1520	9616	2.87	1.227	4.73	1	1	1068.33	44.77	214.76	808.8	18.0657	2.33904	0.512097	679.961
571	0.22	28	0.18	2.52	4.38	1.7	27.4	9.13	104	37.8	171	37.3	365	78.7	120	502	769	1250	9206	6.32	1.834	2.39	1	1	867.33	30.92	146.61	689.8	22.3092	3.44602	0.652796	626.973
572	0.006	0.42	0	0.15	1.01	1.06	5.5	0.74	5.91	1.23	3.93	0.64	4.32	0.85	27.8	2.14	354	43.7	11793	0.16	0.032	2.05	1	1	25.766	0.576	14.22	10.97	19.0451	5	0.0060452	615.863
573	0	0.46	0.018	0.48	1.99	1.62	9.31	1.56	8.73	2.02	5.75	0.81	5.74	0.97	23.8	1.52	316	71.7	11085	0.095	0.02	1.9	1	1	39.458	0.958	23.21	15.29	15.9603	4.75	0.00481013	610.462
574	0.0062	0.23	0	0	0.23	0.21	1.88	0.4	2.85	0.6	1.82	0.25	1.76	0.33	14.2	0.89	190	20.5	11515	0.14	0.025	0.041	1	1	10.5662	0.2362	5.57	4.76	20.1524	5.6	0.00468421	403.076
575	0	0.44	0.004	0.25	1.56	1.51	9.61	1.76	11	2.3	7.06	1.02	6.86	1.12	23.2	1.61	306	82.1	11536	0.09	0.019	1.99	1	1	44.494	0.694	25.44	18.36	26.4553	4.73684	0.00526144	613.744
576	0.059	0.5	0.001	0.3	1.32	0.87	4.63	0.63	4.14	1.15	2.8	0.47	3.3	0.53	17.1	1.55	226	39.6	11059	0.06	0.002	1.06	1	1	20.7	0.86	11.59	8.25	9.59302	30	0.00685841	571.074
577	0.025	0.27	0.004	0.1	1.54	1.11	8.58	1.26	9.02	2.18	6.23	1.1	7.73	1.51	18.7	1.97	244	78.2	11186	0.085	0.004	3.48	1	1	40.659	0.399	21.51	18.75	46.9925	21.25	0.00807377	655.387
578	0	0.3	0	0.13	1.59	1.51	10.6	2.17	12.8	2.69	8.13	1.17	9.1	1.6	22.9	1.09	300	95.9	11159	0.07	0.024	1.35	1	1	51.79	0.43	28.67	22.69	52.7674	2.91667	0.00363333	586.962
579	0	0.23	0	0.049	0.74	0.75	5.17	1	5.1	1.31	3.8	0.46	3.46	0.65	15.5	0.98	199	45.4	11788	0.11	0.02	1.9	1	1	22.719	0.279	12.76	9.68	34.6953	5.5	0.00492462	610.462
580	0.003	0.4	0.013	0.25	1.63	1.97	13.8	2.44	15.1	3.1	9.97	1.56	13.7	2.62	21.5	1.6	282	105	11182	0.096	0.015	1.1	1	1	66.556	0.666	34.94	30.95	46.4715	6.4	0.00567376	573.469
581	0.0076	0.58	0	0.063	1.28	1.08	9.74	1.45	7.63	1.67	5.36	0.84	5.95	1.06	29.8	2.1	401	56.6	10624	0.16	0.025	0.63	1	1	36.7106	0.6506	21.18	14.88	22.8712	6.4	0.00523691	538.805
582	0	0.39	0	0.26	2.11	1.75	11.6	1.87	11.9	2.62	7.89	1.15	9.7	1.52	23.6	1.19	321	95	11764	0.048	0.027	1.54	1	1	52.76	0.65	29.23	22.88	35.2	1.77778	0.00370717	595.867
583	0.063	0.28	0.02	0.048	0.38	0.27	1.93	0.22	2.04	0.31	1.04	0.17	1.42	0.24	13.4	2.45	175	14.2	12230	0.091	0.044	2.42	1	1	8.431	0.411	4.84	3.18	7.73723	2.06818	0.014	627.889
584	0.0018	0.43	0.004	0.48	1.93	1.78	9.22	1.26	8.42	1.99	5.99	1	6.76	1.13	24.9	2.86	339	67.7	11707	0.11	0.011	0.45	1	1	40.3958	0.9158	22.61	16.87	18.4211	10	0.00843658	519.219
585	0	0.32	0.016	0.14	0.91	1.12	7.19	1.26	8.46	1.82	5.62	0.88	5.39	0.88	19.6	1.35	273	64.7	11458	0.069	0.027	1.01	1	1	34.006	0.476	18.94	14.59	30.6513	2.55556	0.00494505	567.97
586	0.0058	0.37	0.0059	0.26	1.07	1.01	5.11	0.9	5.6	1.2	4.42	0.62	5.03	1.16	21.6	1.49	297	44.2	12065	0.1	0.028	1.66	1	1	26.7617	0.6417	13.69	12.43	19.3704	3.57143	0.00501684	601.025
587	0	0.39	0.0078	0.2	1.43	1.12	7.58	1.01	7.48	1.64	4.27	0.62	4.51	0.82	18.3	1.22	258	54.7	11677	0.15	0.034	1.08	1	1	31.0778	0.5978	18.62	11.86	19.8394	4.41176	0.00472868	572.281
588	0	0.36	0	0.27	1.86	1.88	13.6	2.51	15.4	3.43	10.3	1.55	13.7	2.57	30.3	1.87	419	108	11445	0.057	0.042	1.29	1	1	67.43	0.63	35.25	31.55	50.0794	1.35714	0.00446301	583.93
589	0.071	0.88	0.07	0.25	1.55	1.18	6.54	0.83	5.1	0.8	2.29	0.32	2.08	0.31	33.5	3.39	459	33.1	11637	0.13	0.034	1.67	1	1	22.271	1.271	15.2	5.8	4.56334	3.82353	0.00738562	601.44
590	0	0.78	0	0.16	2.39	1.95	11.9	2.01	10.2	2.37	6.34	0.93	6.46	1.27	51.9	3.56	724	79.3	11227	0.24	0.038	1.65	1	1	46.76	0.94	28.45	17.37	18.4787	6.31579	0.00491713	600.607
591	15.3	23.9	5.35	24.7	7.18	2.39	10.8	1.21	6.53	1.2	2.91	0.4	2.83	0.51	23.1	1.65	308	41.4	11165	0.12	0.028	1	1	1	105.21	69.25	28.11	7.85	0.113357	4.28571	0.00535714	567.333
592	0.081	0.84	0.085	0.86	2.49	2.04	11.1	1.63	9.82	2.62	8.07	1.17	8.62	1.4	36.2	4.31	479	87.2	10711	0.18	0.034	0.37	1	1	50.826	1.866	27.08	21.88	11.7256	5.29412	0.00899791	508.253
593	0	0.71	0	0.31	2.18	1.67	10.8	2.05	12.5	2.7	8.23	1.25	9.55	1.69	37.5	2.9	546	89.6	10840	0.17	0.055	2.39	1	1	53.64	1.02	29.2	23.42	22.9608	3.09091	0.00531136	626.973
594	0	0.5	0.026	0.1	1.24	1.59	7.46	1.2	7.6	1.63	4.57	0.57	4.13	0.68	29	3.49	408	53.3	10580	0.15	0.029	1.08	1	1	31.296	0.626	19.09	11.58	18.4984	5.17241	0.00855392	572.281
595	0.01	0.386	0.009	0.136	0.29	0.28	1.89	0.48	5.25	1.77	6.82	1.42	12.1	2.22	10.9	3.73	204	62.2	12486	0.17	0.033	5.01	1	1	33.061	0.541	8.19	24.33	44.9723	5.15152	0.0182843	684.712
596	0.006	0.127	0	0	0.27	0.23	1.94	0.4	4.62	1.43	6.74	1.54	14.7	2.28	4.55	1.16	88.8	55.2	12093	0.13	0.062	0.28	1	1	34.283	0.133	7.46	26.69	200.677	2.09677	0.0130631	493.153
597	0.034	0.289	0.018	0.158	0.27	0.16	1.46	0.32	4.56	1.48	5.89	1.11	10	1.86	7.67	0.47	161	51.1	12734	0.18	0.068	4.23	1	1	27.609	0.499	6.77	20.34	40.7615	2.64706	0.00291925	670.866
598	0	0.015	0	0	0	0.057	0.86	0.55	10.2	5.39	33.3	9.56	120	25.9	13.9	0.28	276	203	11049	0.2	0.05	0.1	1	1	205.832	0.015	11.667	194.15	12943.3	4	0.00101449	442.094
599	0.015	0.141	0	0.05	0.15	0.14	2.03	0.68	7.3	2.86	12.3	2.44	24	4.22	5.06	2.24	95.2	101	11982	0.17	0.03	1.41	1	1	56.326	0.206	10.3	45.82	222.427	5.66667	0.0235294	589.883
600	0.005	0.369	0	0.089	0.33	0.27	3.04	0.6	5.48	1.38	4.26	0.81	6.67	0.88	5.43	0.12	115	46.6	12130	0.17	0.024	1.75	1	1	24.183	0.463	9.72	14	30.2376	7.08333	0.00104348	604.691
601	0.011	0.285	0	0.051	0.31	0.22	2.05	0.5	4.07	1.11	3.06	0.67	5.56	0.88	14.5	2.53	290	34.9	11844	0.16	0.061	0.96	1	1	18.777	0.347	7.15	11.28	32.5072	2.62295	0.00872414	564.732
602	0.012	0.164	0.025	0.093	0.3	0.2	2.05	0.88	12.1	4.41	17.7	4.05	42.9	7.54	17.2	0.4	364	145	11976	0.26	0.08	0.38	1	1	92.424	0.294	15.53	76.6	260.544	3.25	0.0010989	509.729
603	0	0.283	0	0.014	0.32	0.23	2.65	0.77	8.68	3.16	13.9	2.74	24.3	4.07	10	1.72	192	113	11632	0.26	0.066	2.21	1	1	61.117	0.297	12.65	48.17	162.189	3.93939	0.00895833	621.27
604	0.006	0.21	0	0.067	0.4	0.37	2.99	0.7	7.93	2.7	9.78	2.13	19.5	3.14	9.54	1.9	184	95.5	11710	0.15	0.027	1.03	1	1	49.923	0.283	12.39	37.25	131.625	5.55556	0.0103261	569.227
605	0.014	0.317	0	0.207	0.58	0.44	3.91	1.35	15	5.24	20.5	4.43	39.1	6.24	13.3	3.96	243	163	11856	0.37	0.141	2.45	1	1	97.328	0.538	21.28	75.51	140.353	2.62411	0.0162963	628.795
606	0	0.826	0.014	0.183	2.11	1.33	8.31	1.24	9.42	2.16	6.74	1.16	9.84	1.45	9.12	1.57	180	68.2	11246	0.14	0.059	1.65	1	1	44.783	1.023	22.41	21.35	20.87	2.37288	0.00872222	600.607
607	0	0.254	0.004	0.099	0.35	0.56	4.14	0.93	7.64	2.2	6.92	1.47	12.8	1.94	6.31	0.44	119	75.1	11900	0.14	0.039	1.31	1	1	39.307	0.357	13.62	25.33	70.9524	3.58974	0.00369748	584.954
608	0	0.155	0	0.035	0.13	0.17	1.29	0.41	4.33	1.41	6.15	1.28	11.3	1.67	31.6	230	431	53.3	10926	0.13	0.048	2.02	1	1	28.33	0.19	6.33	21.81	114.789	2.70833	0.533643	614.81
609	0	0.093	0.007	0.046	0.16	0.2	1.69	0.79	9.19	4.49	19	3.97	35.7	6.35	13.6	0.52	279	145	11618	0.21	0.161	0.66	1	1	81.686	0.146	12.03	69.51	476.096	1.30435	0.0018638	541.589
610	0	0.313	0	0.025	0.21	0.15	1.11	0.29	2.49	0.54	2.09	0.46	5.09	0.92	21.4	8.95	393	23.2	11313	0.17	0.077	1.26	1	1	13.688	0.338	4.25	9.1	26.9231	2.20779	0.0227735	582.369
611	0.034	0.316	0.004	0.093	0.14	0.17	2.37	0.82	10.4	3.65	13.8	2.89	26.6	4.36	45.7	4.89	809	122	11622	0.26	0.101	1.55	1	1	65.647	0.447	13.9	51.3	114.765	2.57426	0.0060445	596.31
612	0.011	0.322	0.002	0.132	0.49	0.46	4.13	1.06	9.43	2.45	7.94	1.65	12.9	1.99	14.1	2.2	269	87.5	11421	0.15	0.042	0.3	1	1	42.967	0.467	15.57	26.93	57.666	3.57143	0.00817844	496.836
613	0.014	0.407	0.007	0.069	0.36	0.3	3.29	1.03	12.9	4.19	15.6	2.73	22.2	3.33	5.53	1.15	104	131	11461	0.61	0.136	1.61	1	1	66.427	0.497	17.88	48.05	96.6801	4.48529	0.0110577	598.915
614	0	0.059	0	0.024	0.15	0.13	1.1	0.68	12	6.7	36.8	10.4	124	26.8	12.7	1.17	256	230	11159	0.32	0.08	2.01	1	1	218.843	0.083	14.06	204.7	2466.27	4	0.00457031	614.456
615	0	0.038	0	0	0.12	0.061	1.02	0.42	8.3	3.97	22.5	6.15	73.5	15.8	11.7	3.3	218	146	10410	0.2	0.073	0.74	1	1	131.879	0.038	9.921	121.92	3208.42	2.73973	0.0151376	548.519
616	0.084	0.042	0	0	0	0.066	0.65	0.3	6.19	3.02	18.7	5.33	60.5	12.9	14.2	5.15	271	116	10527	0.19	0.108	0.56	1	1	107.782	0.126	7.206	100.45	797.222	1.75926	0.0190037	531.839
617	0	0.179	0	0.084	0.17	0.21	2.17	0.49	5.86	2.87	13.8	3.44	41.7	8.92	13.3	2.5	254	98	11989	0.32	0.073	2.62	1	1	79.893	0.263	8.9	70.73	268.935	4.38356	0.00984252	633.76
618	0	0.048	0	0	0	0.075	0.89	0.51	7.83	3.96	19.9	5	59.9	12.3	29.2	14.4	539	131	10742	0.42	0.067	0.32	1	1	110.413	0.048	9.305	101.06	2105.42	6.26866	0.0267161	500.314
619	0.02	3.1	0.025	0.22	0.62	0.29	6.14	3.87	66.7	32.9	191	53.5	613	137	95.1	3.64	280	1053	11607	2.78	1.35	2.76	1	0.5	1108.38	3.365	77.62	1027.4	305.319	2.05926	0.013	692.827
620	0.01	0.5	0.001	0.084	0.41	0.31	5.89	3.53	63.8	28.6	160	42	466	101	92.7	2.8	275	920	11283	1.49	1.26	2.88	1	0.5	872.135	0.595	73.94	797.6	1340.5	1.18254	0.0101818	696.434
621	0.004	0.83	0.005	0.17	0.62	0.29	5.69	3.58	64	30.6	177	45.3	506	108	61.7	3.44	260	982	12159	1	0.95	2.1	1	0.5	942.089	1.009	74.18	866.9	859.167	1.05263	0.0132308	670.292
622	0.01	33.1	0.06	0.91	1.92	0.39	12.8	5.63	78.3	32.7	152.5	35.9	379	64.7	62.1	136.94	172.56	991	8914	8.4	2.1	2.7	1	0.5	797.92	34.08	99.04	664.8	19.507	4	0.793579	690.975
623	0.01	32.8	0.07	0.63	2.04	0.53	13.6	5.18	70.1	28	133.4	31.1	320	56.7	32.5	45.82	54.1	831	8001	3.8	1.1	1.8	1	0.5	694.16	33.51	91.45	569.2	16.986	3.45455	0.84695	658.039
624	0.01	49.9	0.06	1.05	2.23	0.67	15.2	5.72	76	30.9	149.4	36.6	391	67.4	42.6	133.71	136.18	963	9383	6.8	1.6	2.8	1	0.5	826.14	51.02	99.82	675.3	13.236	4.25	0.981862	694.044
625	0.07	54.2	0.09	1.3	2.7	0.66	17.2	7.09	93.1	39.2	190.9	46.2	478	81.1	44.3	178.64	177.38	1193	9451	9	2.3	3	1	0.5	1011.81	55.66	120.75	835.4	15.009	3.91304	1.0071	699.919
626	0	34.7	0.05	0.86	2.68	0.55	13.2	4.73	64.2	26	121.3	28.8	300	51	45	73.26	80.45	761	8357	4.1	1.1	2.6	1	0.5	648.07	35.61	85.36	527.1	14.802	3.72727	0.910628	687.812
627	0.01	21.7	0.03	0.58	1.63	0.81	9.1	3.21	39.9	15.8	78.8	17.6	200	35.9	68.8	47.28	79.47	501	7977	1.7	0.3	2.6	1	0.5	425.07	22.32	54.65	348.1	15.5959	5.66667	0.594941	687.812
628	0.01	0.3	0.01	0	0.02	0.05	0.4	0.33	5.3	3.5	25	8.6	130	33.6	56.1	0.59	72.66	133	9239	0.7	0.1	0.9	1	0.5	207.12	0.32	6.1	200.7	627.188	7	0.00812001	606.659
629	0.01	43.1	0.02	0.9	2.24	0.46	11.6	5.24	70.2	31	150.4	36	372	63.3	51.9	110.65	132.66	944	9717	6.2	1.5	2.2	1	0.5	786.47	44.03	89.74	652.7	14.824	4.13333	0.834087	674.054
630	0.01	2.1	0.01	0.09	0.15	0.13	1.4	0.61	9.3	4.8	26.8	7.8	95	20.4	52.2	4.85	278.57	179	9805	1	0.2	1.2	1	0.5	168.6	2.21	11.59	154.8	70.0452	5	0.0174103	627.28
631	0.02	80.5	0.12	2.12	5.54	1.82	31.2	10.21	127.3	49.1	228.2	50.1	486	85.9	33.8	146.41	100.32	1437	7770	5.4	1	2.3	1	0.5	1158.13	82.76	176.07	899.3	10.8664	5.4	1.45943	677.676
632	0.01	14	0.02	0.19	0.65	0.26	4.1	1.83	23.6	10.9	56.5	15.8	200	41.1	25	27.02	221	350	9892	2.7	0.5	1.6	1	0.5	368.96	14.22	30.44	324.3	22.8059	5.4	0.122262	648.89
633	0.01	0.9	0.01	0.05	0.06	0.09	0.6	0.29	5.2	2.7	18.2	6	91	23.5	24.3	1.95	167.72	106	9717	0.7	0.1	0.8	1	0.5	148.61	0.97	6.24	141.4	145.773	7	0.0116265	598.487
634	0.06	1.1	0.21	0.09	0.13	0.11	0.6	0.33	5.7	3	19.5	6.4	91	20.7	24.7	2.03	138.53	124	9918	0.7	0.1	0.8	1	0.5	148.93	1.46	6.87	140.6	96.3014	7	0.0146539	598.487
635	0.01	70.2	0.03	1.04	1.45	0.25	9.3	4.12	57.7	27.5	153.9	39.8	453	88.4	65.2	139.63	128.76	998	8262	7.7	1.3	1.9	1	0.5	906.7	71.28	72.82	762.6	10.6987	5.92308	1.08442	662.301
636	1.84	32.5	1.08	5.45	4.16	0.82	10.2	4.36	54.3	21.8	115.4	29.6	344	73.7	28	111.59	1535.97	787	13580	18	6.4	2.1	1	0.5	699.21	40.87	73.84	584.5	14.3014	2.8125	0.0726512	670.292
637	0.01	40.6	0.15	2.29	4.96	1.27	23.8	8.72	112.1	43.4	198.2	43.6	437	74.8	33.1	82.95	68.95	1267	8168	2.7	0.6	3	1	0.5	990.9	43.05	150.85	797	18.5134	4.5	1.20305	699.919
638	0.05	58.2	0.55	8.23	10.95	4.12	42	13.1	146.1	51.4	216.3	46.1	449	74.8	38.1	78.8	47.32	1453	6254	1.5	0.4	1.6	1	0.5	1120.9	67.03	216.27	837.6	12.4959	3.75	1.66526	648.89
639	0.01	70.3	0.11	0.96	4.37	0.83	16.6	7.59	97.7	40.6	189.9	45.3	472	83.6	88.6	149.63	120.58	1265	6949	7.3	1.3	3	1	0.5	1029.87	71.38	127.09	831.4	11.6475	5.61538	1.24092	699.919
640	0.05	13	0.07	0.55	0.86	0.42	3.9	1.64	19.8	8.3	42.2	10.3	122	24.7	64.4	37.23	595.32	296	14676	8	3.7	1.9	1	0.5	247.79	13.67	26.62	207.5	15.1792	2.16216	0.0625378	662.301
641	0.02	9.1	0.01	0	0.18	0.11	1.7	0.83	13.6	6.9	45	14.5	207	53.9	47.4	34.8	1077.92	262	10478	6.2	1.9	0.9	1	0.5	352.85	9.13	16.42	327.3	35.8488	3.26316	0.0322844	606.659
642	0.02	12.85	0.05	0.99	1.52	0.59	8.69	4.59	76.6	39.82	242.57	68.71	804.51	200.37	54.2	88.6	2550.4	1409.8	39011	15.96	0.85	4.51	1	1	1461.88	13.91	91.99	1355.98	97.4824	18.7765	0.0347396	676.062
643	0.12	15.73	0.07	0.46	0.65	0.66	8.49	2.92	51.7	23.45	145.66	44.42	590.14	148.01	53.4	104	2353.2	885.1	31172	5.64	0.85	4.3	1	1	1032.48	16.38	64.42	951.68	58.1001	6.63529	0.0441951	672.191
644	0.02	8.3	0.05	0.62	1.27	0.47	4.77	2.25	36	19.45	118.67	36.7	483.86	133.37	32.1	37.5	1392.8	695.7	32949	3.48	0.85	4.8	1	1	845.8	8.99	44.76	792.05	88.1034	4.09412	0.0269242	681.17
645	0.44	13.96	0.05	1.11	1.19	1.36	13.34	5	64.4	38.15	189.16	59.45	571.83	183.13	66.8	110.5	2295.3	903.9	50034	13.35	0.85	4.03	1	1	1142.57	15.56	85.29	1041.72	66.9486	15.7059	0.0481419	666.977
646	0.02	23.29	0.15	0.45	2.39	0.72	7.19	3.37	38.04	20.59	106.48	36.27	366.2	118.72	28	107.9	904.6	517.54	42474	5.29	0.85	2.13	1	1	723.88	23.91	51.71	648.26	27.1125	6.22353	0.119279	618.609
647	0.06	11.7	0.21	2.13	8.19	15.1	41.5	44.6	66.3	75.6	88.3	87.5	112	130	38.3	58	1232	152	10900	0.15	0.025	1.14	0.5	0.5	683.19	14.1	175.69	493.4	34.9929	6	0.0470779	575.792
648	0.06	3.25	0	0.58	1.66	7.48	13.2	10.7	19.3	26.1	28.1	36.5	51.4	70.5	12	6.95	382	55.8	10931	0.078	0.025	0.36	0.5	0.5	268.83	3.89	52.34	212.6	54.653	3.12	0.0181937	506.742
649	2.99	25.5	6.8	8.35	31	40.3	106	116	131	142	149	155	192	229	104	136	3287	289	11548	0.02	0.003	1	0.5	0.5	1334.94	43.64	424.3	867	19.8671	6.66667	0.0413751	567.333
650	3.47	20.6	3.23	3.09	4.97	7.49	26.9	32.7	55.6	78.4	103	138	177	244	27.5	206	1259	167	7340	0.091	0.007	2.27	0.5	0.5	898.45	30.39	127.66	740.4	24.3633	13	0.163622	623.213
651	1.25	52.4	2.16	4.46	28.9	17.9	179	3.45	40.8	16.42	80.1	20.06	4937	41.89	149	1714	245	2432	11158	25.3	14	2.88	0.5	0.5	5425.79	60.27	270.05	5095.47	84.5441	1.80714	6.99592	640.856
652	0	3.08	0.036	0.57	2	3	5.97	9.3	10.8	16.7	18.8	26.5	29.9	39.6	13.8	15.1	671	34.5	8371	0.1	0.026	0.29	1	0.5	166.256	3.686	31.07	131.5	35.6755	3.84615	0.0225037	533.902
653	2.89	30.9	2.47	10	45.5	40.7	110	143	204	289	398	20.06	812	41.89	159	1615	245	665	11746	0.98	0.68	0.47	1	0.5	2150.41	46.26	543.2	1560.95	33.743	1.44118	6.59184	563.397
654	2.42	22.8	1.62	8.43	47.8	62.1	125	138	181	217	262	281	339	406	210	278	245	450	9812	0.5	0.44	2.7	1	0.5	2094.17	35.27	553.9	1505	42.6708	1.13636	1.13469	690.975
655	0	3.48	0	0	0.18	0	0	1.07	2.02	3.87	4.55	5.57	8.18	14.7	2.88	10.6	87.7	7.83	9583	0.13	0.021	0.61	1	0.5	43.62	3.48	3.27	36.87	10.5948	6.19048	0.120867	580.238
656	0.119	2.32	0.137	0.11	1.87	1.43	1.93	4.07	4.81	8.37	8.04	11.2	11.8	15	2.95	5.74	90.7	14.8	10100	0.052	0.005	0.72	1	0.5	71.206	2.686	14.11	54.41	20.2569	10.4	0.0632856	591.304
657	0.167	5.34	0.18	0.4	1.97	2.94	9.2	8.7	11.3	16.4	19.7	23.1	30.9	39.2	4.15	21.6	129	29.7	9380	0.088	0.003	2.11	1	0.5	169.497	6.087	34.11	129.3	21.242	29.3333	0.167442	670.675
658	0.042	14.2	0.12	0.73	3.2	6.98	13.4	12.8	17.6	21.4	23.8	23.8	31.8	38	11.2	104	355	41.7	9337	0.14	0.009	0.3	0.5	0.5	207.872	15.092	53.98	138.8	9.19693	15.5556	0.292958	496.836
659	0.149	3.17	0.07	0.34	1.33	2.37	4.04	4.09	6.21	9.31	11.1	11	16.8	22.1	4.46	11.9	124	19.6	10308	0.065	0.006	4.04	0.5	0.5	92.079	3.729	18.04	70.31	18.8549	10.8333	0.0959677	667.175
660	2.61	49.8	2.57	4.22	27.8	28.9	68.3	83.6	100	117	129	149	192	230	20.4	56.7	585	218	7652	0.29	0.034	0.55	0.5	0.5	1184.8	59.2	308.6	817	13.8007	8.52941	0.0969231	530.784
661	0.757	5.18	0.189	0.56	1.59	1.75	8.04	7.42	15.9	21.4	28.3	33.4	43.1	65.6	5.94	21.3	179	44.5	9565	0.12	0.006	2.5	0.5	0.5	233.186	6.686	34.7	191.8	28.6868	20	0.118994	630.284
662	0.021	3.07	0	0.22	2.56	3.46	4.24	7.51	8.16	9.7	14.5	13.7	21	30.1	4.06	11.6	137	25.1	9844	0.041	0.009	0.33	0.5	0.5	118.241	3.311	25.93	89	26.8801	4.55556	0.0846715	501.983
663	0.038	11.9	0.23	0.76	2.89	4.49	12.5	12.1	15.2	19.6	24.9	32.7	35.7	54.1	5.04	72.8	230	40.9	6105	0.054	0.003	0.54	0.5	0.5	227.108	12.928	47.18	167	12.9177	18	0.316522	529.713
664	0.16	3.2	0.095	1.61	2.41	4.8	7.56	8.31	11.5	17.7	22	27.4	40.9	49.8	6.69	29.4	184	37.2	8264	3.95	0.254	1.32	0.5	0.5	197.445	5.065	34.58	157.8	31.155	15.5512	0.159783	585.461
665	0.019	3.26	0.135	0.28	1.7	1.8	3.68	6.5	10.3	12.6	17.2	20.1	28.5	37.1	3.65	7.58	109	28.3	9874	0.12	0	0.12	0.5	0.5	143.174	3.694	23.98	115.5	31.2669	0	0.0695413	450.633
666	0.107	2.73	0	0.13	1.16	0.74	6.48	7.42	8.2	12.1	12.8	14.1	22.1	30	5.32	9.3	127	24.6	9822	0.076	0	0.43	0.5	0.5	118.067	2.967	24	91.1	30.7044	0	0.0732283	516.644
667	0.17	2.33	0	0.19	0.82	1.39	2.3	3.23	6.4	9.69	10.9	11.3	19.3	22.7	2.8	7.47	92.8	18.3	9972	0.065	0.01	3.75	0.5	0.5	90.72	2.69	14.14	73.89	27.4684	6.5	0.0804957	661.253
668	0.038	2.54	0.033	0.2	1.56	2.98	6.5	6.72	12.4	13.1	17.2	16.4	26.8	34.5	3.94	6.52	125	30.8	10067	0.096	0.013	0.27	0.5	0.5	140.971	2.811	30.16	108	38.4205	7.38462	0.05216	491.225
669	0	8.12	0.013	0.34	0.86	0.23	8.52	3.95	59.5	30.3	176	47.2	548	130	81.6	519	3853	1072	11866	5.87	2.11	1.53	1	0.5	1013.03	8.473	73.06	931.5	109.937	2.78199	0.1347	645.461
670	0.016	2.85	0.003	0.88	3.03	0.67	19.9	8.16	112	50.2	274	69.5	765	168	55.8	112	2736	1662	10632	3.62	2.04	1.81	1	0.5	1474.21	3.749	143.76	1326.7	353.881	1.77451	0.0409357	658.474
671	0.026	8.78	0.01	0.13	0.82	0.2	7.19	3.5	54.6	27.7	164	46.1	566	148	99.3	602	4639	1021	11574	3.34	0.99	1.6	1	0.5	1027.06	8.946	66.31	951.8	106.394	3.37374	0.129769	648.89
672	0.082	2.55	0.026	0.022	0.36	0.16	2.66	0.94	15.4	7.5	40.1	10.1	124	31.7	14.4	25	715	250	9320	0.49	0.27	2.15	1	0.5	235.6	2.68	19.52	213.4	79.6269	1.81481	0.034965	672.191
673	0.031	1.19	0.019	0.091	0.26	0.12	5.37	2.45	41.6	20.7	120	32.7	382	89.4	24.1	30	1177	707	10717	2.84	1.92	2.01	1	0.5	695.931	1.331	49.8	644.8	484.448	1.47917	0.0254885	666.778
674	0.254	10.3	0.127	1.18	0.73	0.32	6.06	2.79	43.5	23.8	153	45	612	172	137	384	245	918	14112	4.5	1.85	1.81	1	0.5	1071.06	11.861	53.4	1005.8	84.7989	2.43243	1.56735	658.474
675	0.089	8.08	0.073	0.48	0.43	0.2	3.84	1.82	27.7	13.9	82.6	22	277	71	72.7	426	3327	502	11706	1.84	0.73	2.82	1	0.5	509.212	8.722	33.99	466.5	53.4854	2.52055	0.128043	694.646
676	0	8.96	0.038	0.15	0.41	0.24	7.79	3.91	59.3	29.7	178	48.2	573	137	89	530	4196	1085	11478	6.72	3.19	1.64	1	0.5	1046.7	9.148	71.65	965.9	105.586	2.10658	0.126311	650.793
677	0	1.04	0	0	0.42	0.15	4.77	2.36	42.9	23.2	152	46.3	584	145	65.8	29.8	3234	929	9281	2.66	1.54	0.79	1	0.5	1002.14	1.04	50.6	950.5	913.942	1.72727	0.00921459	597.623
678	0	1.36	0.01	0.13	0.66	0.16	5.01	2.74	39.5	15.3	80.9	29.1	311	77.3	13.9	60.2	1677	484	11601	2.45	1.63	0.68	1	0.5	563.17	1.5	48.07	513.6	342.4	1.50307	0.0358974	587.457
679	0.002	8.92	0.036	0.12	0.69	0.22	6.13	3.45	51.7	25.1	152	43.3	522	120	84.7	448	3832	942	10523	6.4	2.64	0.69	1	0.5	933.668	9.078	62.19	862.4	94.9989	2.42424	0.11691	588.436
680	0.029	10.4	0.022	0	0.83	0.28	6.67	3.14	45	21.9	126	35.2	428	109	107	914	4960	807	11376	2.75	1.3	2.46	1	0.5	786.471	10.451	55.92	720.1	68.9025	2.11538	0.184274	683.209
681	0.012	8.78	0	0.21	1.4	0.25	9.92	4.05	62.5	31.2	179	48	557	134	93.8	603	4370	1106	10773	5.37	2.47	2.07	1	0.5	1036.32	9.002	78.12	949.2	105.443	2.17409	0.137986	669.135
682	0.093	1.04	0.009	0.16	0.36	0.15	4.92	2.62	42.9	21.7	132	37.3	473	113	55.4	31	2687	843	10395	2.82	1.62	2.36	1	0.5	829.252	1.302	50.95	777	596.774	1.74074	0.011537	679.787
683	0.01	2.24	0	0.3	0.47	0.35	8.42	3.85	65.8	34.7	218	63.5	776	185	116	55.9	5514	1364	10423	10	5.23	2.5	1	0.5	1358.64	2.55	78.89	1277.2	500.863	1.91205	0.0101378	684.546
684	0.037	2.4	0.002	0.053	0.236	0.059	1.18	0.71	11.2	6	36.5	10.2	131	34.2	35.7	66.5	1746	211	17113	1.52	1.2	0.74	1	0.5	233.777	2.492	13.385	217.9	87.4398	1.26667	0.0380871	593.161
685	0.017	13.5	0.018	0.756	1.28	0.454	12.34	5.45	76.2	35.7	198	53.2	613	154	234.6	1062	245	1260	14382	6.92	4.24	1.29	1	0.5	1163.91	14.291	95.724	1053.9	73.7457	1.63208	4.33469	632.616
686	0	3.17	0.003	0.014	0.255	0.106	2.56	1.13	17.4	9.4	56.7	15.5	187	47.3	27.7	134	1373	334	13491	2.01	1.75	0.33	1	0.5	340.538	3.187	21.451	315.9	99.1214	1.14857	0.0975965	541.589
687	0	6.57	0	0.276	0.663	0.211	5.39	2.56	35.4	16.1	90.2	24.5	284	69.2	67.5	464	3188	578	12215	3.02	2.12	1.55	1	0.5	535.07	6.846	44.224	484	70.6982	1.42453	0.145546	646.454
688	0	6.33	0.025	0.529	1.6	0.289	11.4	4.52	63	28.7	161	42.9	498	123	75.1	514	3565	1002	11536	3.61	2.84	1.28	1	0.5	941.293	6.884	80.809	853.6	123.998	1.27113	0.14418	632.039
689	0.025	10.1	0.027	0.168	0.932	0.356	6.46	3.03	45.1	21.3	117	30.9	358	87.2	72.2	536	3396	764	12229	3.8	2.48	1.97	1	0.5	680.598	10.32	55.878	614.4	59.5349	1.53226	0.157833	665.174
690	0.042	15.7	0.041	0.579	1.23	0.461	13.7	5.79	81.6	36.9	210	56.9	658	164	261	1208	245	1330	15905	7.67	6.61	2.15	1	0.5	1244.94	16.362	102.781	1125.8	68.8058	1.16036	4.93061	672.191
691	0.076	9.16	0.036	0.096	0.7	0.33	7.74	3.29	51.9	25.4	149	41	488	121	83.9	474.7	3913	912	12674	4.87	2.43	2.24	1	0.5	897.728	9.368	63.96	824.4	88.0017	2.00412	0.121314	675.519
692	0.014	7.93	0.029	0.385	1.75	0.565	11.7	4.35	64.7	29.8	163	43	497	119	69.8	535.1	3243	1024	12540	2.8	1.82	1.56	1	0.5	943.223	8.358	83.065	851.8	101.914	1.53846	0.165002	646.946
693	0	9.42	0.011	0.389	1.13	0.424	8.75	3.83	57.8	28.4	169	48.1	595	152	86.9	490.9	4065	1016	12438	5.9	4.14	2.11	1	0.5	1074.25	9.82	71.934	992.5	101.069	1.42512	0.120763	670.675
694	0.007	9.68	0.123	1.812	3.46	0.764	22.9	8.97	125	54.6	294	72.8	800	184	93.3	889.9	4285	1863	10883	3.35	2.28	1.77	1	0.5	1578.12	11.622	161.094	1405.4	120.926	1.4693	0.207678	656.723
695	0	7	0.019	0.04	0.7	0.296	6.97	2.88	47.8	22.3	130	35.6	421	104	68.8	401	3242	796	12241	3.98	2.01	1.225	1	0.5	778.605	7.059	58.646	712.9	100.992	1.9801	0.123689	628.795
696	0.002	5.33	0.017	0.256	0.52	0.124	4.92	2.33	34.9	17.3	102	27.5	325	80.4	49.5	255.3	2380	615	12264	3.67	1.77	1.31	1	0.5	600.599	5.605	42.794	552.2	98.5192	2.07345	0.107269	633.76
697	0.017	8.32	0.005	0.233	0.64	0.233	7.5	3.28	50.3	24.6	140	37.5	443	108	85.5	474.5	4001	846	12985	3.83	1.66	1.95	1	0.5	823.628	8.575	61.953	753.1	87.8251	2.30723	0.118595	664.362
698	0.229	12	0.146	0.918	1.14	0.44	7.65	3.34	47.9	22.1	126	33.4	387	95.8	105.2	703.1	4892	784	12681	3.86	2.34	1.55	1	0.5	738.063	13.293	60.47	664.3	49.9737	1.64957	0.143724	646.454
699	34.3	5.86	12.5	64.5	39.9	9.05	139	47.7	40.8	250	1191	242	2436	418	276	530	525	7806	21689	32.9	5.81	4.24	1	1	4930.61	117.16	276.45	4537	38.7248	5.66265	1.00952	671.056
700	0.09	42.7	0.23	0.41	4.17	0.87	11.9	5.62	96.5	48.9	317	87.1	1155	248	68.7	73.6	2001	1884	35005	173	85.5	2.51	1	1	2018.49	43.43	119.06	1856	42.7354	2.02339	0.0367816	630.579
701	0.3	40.8	0.14	1.76	2.63	0.96	10	5.1	80.7	41.3	277	80.8	1098	251	102.8	80.1	3255	1658	38258	207	131	5.91	1	1	1890.49	43	99.39	1748.1	40.6535	1.58015	0.0246083	698.625
702	0.06	11.7	0.21	2.13	8.19	15.1	41.5	44.6	66.3	75.6	88.3	87.5	112	130	38.3	58	1232	152	10900	0.15	0.025	1.14	1	1	683.19	14.1	175.69	493.4	34.9929	6	0.0470779	575.792
703	0.06	3.25	0	0.58	1.66	7.48	13.2	10.7	19.3	26.1	28.1	36.5	51.4	70.5	12	6.95	382	55.8	10931	0.078	0.025	0.36	1	1	268.83	3.89	52.34	212.6	54.653	3.12	0.0181937	506.742
704	2.99	25.5	6.8	8.35	31	40.3	106	116	131	142	149	155	192	229	104	136	3287	289	11548	0.02	0.003	1	1	1	1334.94	43.64	424.3	867	19.8671	6.66667	0.0413751	567.333
705	3.47	20.6	3.23	3.09	4.97	7.49	26.9	32.7	55.6	78.4	103	138	177	244	27.5	206	1259	167	7340	0.091	0.007	2.27	1	1	898.45	30.39	127.66	740.4	24.3633	13	0.163622	623.213
706	1.25	52.4	2.16	4.46	28.9	17.9	179	3.45	40.8	16.42	80.1	20.06	4937	41.89	149	1714	245	2432	11158	25.3	14	2.88	1	1	5425.79	60.27	270.05	5095.47	84.5441	1.80714	6.99592	640.856
707	1.37	23.8	2.79	13.8	55.2	29.6	67	73.9	101	157	213	335	625	41.89	260	52.41	245	381	12159	0.67	0.36	5.99	1	1	1740.35	41.76	326.7	1371.89	32.8518	1.86111	0.213918	699.776
708	0	3.08	0.036	0.57	2	3	5.97	9.3	10.8	16.7	18.8	26.5	29.9	39.6	13.8	15.1	671	34.5	8371	0.1	0.026	0.29	1	1	166.256	3.686	31.07	131.5	35.6755	3.84615	0.0225037	495.022
709	2.89	30.9	2.47	10	45.5	40.7	110	143	204	289	398	20.06	812	41.89	159	1615	245	665	11746	0.98	0.68	0.47	1	1	2150.41	46.26	543.2	1560.95	33.743	1.44118	6.59184	521.696
710	2.42	22.8	1.62	8.43	47.8	62.1	125	138	181	217	262	281	339	406	210	278	245	450	9812	0.5	0.44	2.7	1	1	2094.17	35.27	553.9	1505	42.6708	1.13636	1.13469	636.004
711	0	3.48	0	0	0.18	0	0	1.07	2.02	3.87	4.55	5.57	8.18	14.7	2.88	10.6	87.7	7.83	9583	0.13	0.021	0.61	1	1	43.62	3.48	3.27	36.87	10.5948	6.19048	0.120867	536.885
712	0.119	2.32	0.137	0.11	1.87	1.43	1.93	4.07	4.81	8.37	8.04	11.2	11.8	15	2.95	5.74	90.7	14.8	10100	0.052	0.005	0.72	1	1	71.206	2.686	14.11	54.41	20.2569	10.4	0.0632856	546.849
713	0.167	5.34	0.18	0.4	1.97	2.94	9.2	8.7	11.3	16.4	19.7	23.1	30.9	39.2	4.15	21.6	129	29.7	9380	0.088	0.003	2.11	1	1	169.497	6.087	34.11	129.3	21.242	29.3333	0.167442	617.931
714	0.042	14.2	0.12	0.73	3.2	6.98	13.4	12.8	17.6	21.4	23.8	23.8	31.8	38	11.2	104	355	41.7	9337	0.14	0.009	0.3	1	1	207.872	15.092	53.98	138.8	9.19693	15.5556	0.292958	496.836
715	0.149	3.17	0.07	0.34	1.33	2.37	4.04	4.09	6.21	9.31	11.1	11	16.8	22.1	4.46	11.9	124	19.6	10308	0.065	0.006	4.04	1	1	92.079	3.729	18.04	70.31	18.8549	10.8333	0.0959677	667.175
716	2.61	49.8	2.57	4.22	27.8	28.9	68.3	83.6	100	117	129	149	192	230	20.4	56.7	585	218	7652	0.29	0.034	0.55	1	1	1184.8	59.2	308.6	817	13.8007	8.52941	0.0969231	530.784
717	0.757	5.18	0.189	0.56	1.59	1.75	8.04	7.42	15.9	21.4	28.3	33.4	43.1	65.6	5.94	21.3	179	44.5	9565	0.12	0.006	2.5	1	1	233.186	6.686	34.7	191.8	28.6868	20	0.118994	630.284
718	0.021	3.07	0	0.22	2.56	3.46	4.24	7.51	8.16	9.7	14.5	13.7	21	30.1	4.06	11.6	137	25.1	9844	0.041	0.009	0.33	1	1	118.241	3.311	25.93	89	26.8801	4.55556	0.0846715	501.983
719	0.038	11.9	0.23	0.76	2.89	4.49	12.5	12.1	15.2	19.6	24.9	32.7	35.7	54.1	5.04	72.8	230	40.9	6105	0.054	0.003	0.54	1	1	227.108	12.928	47.18	167	12.9177	18	0.316522	529.713
720	0.16	3.2	0.095	1.61	2.41	4.8	7.56	8.31	11.5	17.7	22	27.4	40.9	49.8	6.69	29.4	184	37.2	8264	3.95	0.254	1.32	1	1	197.445	5.065	34.58	157.8	31.155	15.5512	0.159783	585.461
721	0.019	3.26	0.135	0.28	1.7	1.8	3.68	6.5	10.3	12.6	17.2	20.1	28.5	37.1	3.65	7.58	109	28.3	9874	0.12	0	0.12	1	1	143.174	3.694	23.98	115.5	31.2669	0	0.0695413	450.633
722	0.107	2.73	0	0.13	1.16	0.74	6.48	7.42	8.2	12.1	12.8	14.1	22.1	30	5.32	9.3	127	24.6	9822	0.076	0	0.43	1	1	118.067	2.967	24	91.1	30.7044	0	0.0732283	516.644
723	0.17	2.33	0	0.19	0.82	1.39	2.3	3.23	6.4	9.69	10.9	11.3	19.3	22.7	2.8	7.47	92.8	18.3	9972	0.065	0.01	3.75	1	1	90.72	2.69	14.14	73.89	27.4684	6.5	0.0804957	661.253
724	0.038	2.54	0.033	0.2	1.56	2.98	6.5	6.72	12.4	13.1	17.2	16.4	26.8	34.5	3.94	6.52	125	30.8	10067	0.096	0.013	0.27	1	1	140.971	2.811	30.16	108	38.4205	7.38462	0.05216	491.225
725	0	8.12	0.013	0.34	0.86	0.23	8.52	3.95	59.5	30.3	176	47.2	548	130	81.6	519	3853	1072	11866	5.87	2.11	1.53	1	1	1013.03	8.473	73.06	931.5	109.937	2.78199	0.1347	595.423
726	0.016	2.85	0.003	0.88	3.03	0.67	19.9	8.16	112	50.2	274	69.5	765	168	55.8	112	2736	1662	10632	3.62	2.04	1.81	1	1	1474.21	3.749	143.76	1326.7	353.881	1.77451	0.0409357	607.048
727	0.026	8.78	0.01	0.13	0.82	0.2	7.19	3.5	54.6	27.7	164	46.1	566	148	99.3	602	4639	1021	11574	3.34	0.99	1.6	1	1	1027.06	8.946	66.31	951.8	106.394	3.37374	0.129769	598.487
728	0.082	2.55	0.026	0.022	0.36	0.16	2.66	0.94	15.4	7.5	40.1	10.1	124	31.7	14.4	25	715	250	9320	0.49	0.27	2.15	1	1	235.6	2.68	19.52	213.4	79.6269	1.81481	0.034965	619.282
729	0.031	1.19	0.019	0.091	0.26	0.12	5.37	2.45	41.6	20.7	120	32.7	382	89.4	24.1	30	1177	707	10717	2.84	1.92	2.01	1	1	695.931	1.331	49.8	644.8	484.448	1.47917	0.0254885	614.456
730	0.063	11.1	0.032	0.48	2.73	0.21	18.4	6.94	86.2	32.8	146	29.7	273	51.4	166	225	409	975	10597	2.58	1.95	5.29	1	1	659.055	11.675	114.48	532.9	45.6445	1.32308	0.550122	689.247
731	0.254	10.3	0.127	1.18	0.73	0.32	6.06	2.79	43.5	23.8	153	45	612	172	137	384	245	918	14112	4.5	1.85	1.81	1	1	1071.06	11.861	53.4	1005.8	84.7989	2.43243	1.56735	607.048
732	0.002	7.94	0.006	0.43	0.81	0.12	8.54	3.74	59.6	29.1	174	46.4	555	132	71.6	367	3369	1042	10838	8.23	4.75	3.4	1	1	1017.69	8.378	72.81	936.5	111.781	1.73263	0.108934	653.577
733	0.089	8.08	0.073	0.48	0.43	0.2	3.84	1.82	27.7	13.9	82.6	22	277	71	72.7	426	3327	502	11706	1.84	0.73	2.82	1	1	509.212	8.722	33.99	466.5	53.4854	2.52055	0.128043	639.267
734	0	8.96	0.038	0.15	0.41	0.24	7.79	3.91	59.3	29.7	178	48.2	573	137	89	530	4196	1085	11478	6.72	3.19	1.64	1	1	1046.7	9.148	71.65	965.9	105.586	2.10658	0.126311	600.188
735	0	1.04	0	0	0.42	0.15	4.77	2.36	42.9	23.2	152	46.3	584	145	65.8	29.8	3234	929	9281	2.66	1.54	0.79	1	1	1002.14	1.04	50.6	950.5	913.942	1.72727	0.00921459	552.532
736	0	2.18	0	0.16	0.81	0.15	4.04	1.95	31.2	14.1	79.9	19.8	232	52.1	33.5	57.3	1653	479	10461	2.6	1.38	4.36	1	1	438.39	2.34	38.15	397.9	170.043	1.88406	0.0346642	673.313
737	0	1.36	0.01	0.13	0.66	0.16	5.01	2.74	39.5	15.3	80.9	29.1	311	77.3	13.9	60.2	1677	484	11601	2.45	1.63	0.68	1	1	563.17	1.5	48.07	513.6	342.4	1.50307	0.0358974	543.386
738	0.002	8.92	0.036	0.12	0.69	0.22	6.13	3.45	51.7	25.1	152	43.3	522	120	84.7	448	3832	942	10523	6.4	2.64	0.69	1	1	933.668	9.078	62.19	862.4	94.9989	2.42424	0.11691	544.268
739	0.029	10.4	0.022	0	0.83	0.28	6.67	3.14	45	21.9	126	35.2	428	109	107	914	4960	807	11376	2.75	1.3	2.46	1	1	786.471	10.451	55.92	720.1	68.9025	2.11538	0.184274	629.095
740	0.012	8.78	0	0.21	1.4	0.25	9.92	4.05	62.5	31.2	179	48	557	134	93.8	603	4370	1106	10773	5.37	2.47	2.07	1	1	1036.32	9.002	78.12	949.2	105.443	2.17409	0.137986	616.558
741	0.093	1.04	0.009	0.16	0.36	0.15	4.92	2.62	42.9	21.7	132	37.3	473	113	55.4	31	2687	843	10395	2.82	1.62	2.36	1	1	829.252	1.302	50.95	777	596.774	1.74074	0.011537	626.048
742	0.01	2.24	0	0.3	0.47	0.35	8.42	3.85	65.8	34.7	218	63.5	776	185	116	55.9	5514	1364	10423	10	5.23	2.5	1	1	1358.64	2.55	78.89	1277.2	500.863	1.91205	0.0101378	630.284
743	0.037	2.4	0.002	0.053	0.236	0.059	1.18	0.71	11.2	6	36.5	10.2	131	34.2	35.7	66.5	1746	211	17113	1.52	1.2	0.74	1	1	233.777	2.492	13.385	217.9	87.4398	1.26667	0.0380871	548.519
744	0.017	13.5	0.018	0.756	1.28	0.454	12.34	5.45	76.2	35.7	198	53.2	613	154	234.6	1062	245	1260	14382	6.92	4.24	1.29	1	1	1163.91	14.291	95.724	1053.9	73.7457	1.63208	4.33469	583.93
745	0	3.17	0.003	0.014	0.255	0.106	2.56	1.13	17.4	9.4	56.7	15.5	187	47.3	27.7	134	1373	334	13491	2.01	1.75	0.33	1	1	340.538	3.187	21.451	315.9	99.1214	1.14857	0.0975965	501.983
746	0.373	14	0.369	1.65	1.19	0.39	8.73	3.55	52.2	24.1	140	37.4	454	118	151.1	822	245	858	12360	2.48	1.28	3.1	1	1	855.952	16.392	66.06	773.5	47.1877	1.9375	3.3551	646.454
747	0	6.57	0	0.276	0.663	0.211	5.39	2.56	35.4	16.1	90.2	24.5	284	69.2	67.5	464	3188	578	12215	3.02	2.12	1.55	1	1	535.07	6.846	44.224	484	70.6982	1.42453	0.145546	596.31
748	0	6.33	0.025	0.529	1.6	0.289	11.4	4.52	63	28.7	161	42.9	498	123	75.1	514	3565	1002	11536	3.61	2.84	1.28	1	1	941.293	6.884	80.809	853.6	123.998	1.27113	0.14418	583.413
749	0.025	10.1	0.027	0.168	0.932	0.356	6.46	3.03	45.1	21.3	117	30.9	358	87.2	72.2	536	3396	764	12229	3.8	2.48	1.97	1	1	680.598	10.32	55.878	614.4	59.5349	1.53226	0.157833	613.026
750	0.042	15.7	0.041	0.579	1.23	0.461	13.7	5.79	81.6	36.9	210	56.9	658	164	261	1208	245	1330	15905	7.67	6.61	2.15	1	1	1244.94	16.362	102.781	1125.8	68.8058	1.16036	4.93061	619.282
751	0.076	9.16	0.036	0.096	0.7	0.33	7.74	3.29	51.9	25.4	149	41	488	121	83.9	474.7	3913	912	12674	4.87	2.43	2.24	1	1	897.728	9.368	63.96	824.4	88.0017	2.00412	0.121314	622.247
752	0.044	9.48	0.047	0.972	1.49	0.597	14.7	5.63	76.9	34.9	192	52	611	148	95.8	637.1	4396	1208	12397	4.01	2.72	4.45	1	1	1147.76	10.543	99.317	1037.9	98.4445	1.47426	0.144927	674.972
753	0.026	9.82	0.084	1.374	3.55	0.373	19.1	5.81	67.5	23.8	104	22.6	211	39.2	50.8	67.2	106	712	10067	1.93	0.82	3.87	1	1	508.237	11.304	96.333	400.6	35.4388	2.35366	0.633962	663.748
754	0.036	13.7	0.098	1.486	2.32	0.253	13.9	4.22	53	18.8	87.1	18.7	182	33.2	49.1	71.7	119	570	10116	2.85	0.92	3.15	1	1	428.813	15.32	73.693	339.8	22.1802	3.09783	0.602521	647.68
755	0.005	10.3	0.06	0.626	0.87	0.38	7.8	3.58	54.6	26.5	157	43.2	534	134	97	472.7	4365	952	12680	5.63	3.42	5.64	1	1	972.921	10.991	67.23	894.7	81.403	1.6462	0.108293	694.646
756	0.014	7.93	0.029	0.385	1.75	0.565	11.7	4.35	64.7	29.8	163	43	497	119	69.8	535.1	3243	1024	12540	2.8	1.82	1.56	1	1	943.223	8.358	83.065	851.8	101.914	1.53846	0.165002	596.75
757	0	9.42	0.011	0.389	1.13	0.424	8.75	3.83	57.8	28.4	169	48.1	595	152	86.9	490.9	4065	1016	12438	5.9	4.14	2.11	1	1	1074.25	9.82	71.934	992.5	101.069	1.42512	0.120763	617.931
758	0.007	9.68	0.123	1.812	3.46	0.764	22.9	8.97	125	54.6	294	72.8	800	184	93.3	889.9	4285	1863	10883	3.35	2.28	1.77	1	1	1578.12	11.622	161.094	1405.4	120.926	1.4693	0.207678	605.484
759	0.008	9.16	0.035	0.291	1.05	0.043	8.11	2.72	35	12.3	53.6	10.8	94.9	17.4	29.8	74.5	66.4	379	10440	3.53	1.19	4.33	1	1	245.417	9.494	46.923	189	19.9073	2.96639	1.12199	672.754
760	0	7	0.019	0.04	0.7	0.296	6.97	2.88	47.8	22.3	130	35.6	421	104	68.8	401	3242	796	12241	3.98	2.01	1.225	1	1	778.605	7.059	58.646	712.9	100.992	1.9801	0.123689	580.508
761	0.145	16.9	0.097	0.977	2.26	0.438	16.72	6.41	92.9	41.3	222	56.5	631	145	165.3	1730.6	245	1424	10834	7.6	3.72	3.71	1	1	1232.65	18.119	118.728	1095.8	60.478	2.04301	7.06367	660.407
762	0.005	6.68	0.023	0.119	1.13	0.195	7.05	2.3	26.5	10.3	49.1	11	108	22.3	66.2	60.1	138	320	9784	1.14	0.4	4.35	1	1	244.702	6.827	37.175	200.7	29.398	2.85	0.435507	673.127
763	0.002	5.33	0.017	0.256	0.52	0.124	4.92	2.33	34.9	17.3	102	27.5	325	80.4	49.5	255.3	2380	615	12264	3.67	1.77	1.31	1	1	600.599	5.605	42.794	552.2	98.5192	2.07345	0.107269	584.954
764	0.017	8.32	0.005	0.233	0.64	0.233	7.5	3.28	50.3	24.6	140	37.5	443	108	85.5	474.5	4001	846	12985	3.83	1.66	1.95	1	1	823.628	8.575	61.953	753.1	87.8251	2.30723	0.118595	612.301
765	0.229	12	0.146	0.918	1.14	0.44	7.65	3.34	47.9	22.1	126	33.4	387	95.8	105.2	703.1	4892	784	12681	3.86	2.34	1.55	1	1	738.063	13.293	60.47	664.3	49.9737	1.64957	0.143724	596.31
766	0.022	4.43	0	0.28	0.203	0	1.07	0.592	11.1	6.32	41.9	13.5	191	48	32	19.9	871	210	12350	8.07	5.09	0.304	1	0.5	318.417	4.732	12.965	300.72	63.5503	1.58546	0.0228473	536.69
767	0.031	8.24	0	0	0.227	0.058	1.15	0.815	11.6	6.38	41.2	13.6	194	47.1	33.7	25	905	208	13056	9.3	5.8	1.62	1	0.5	324.401	8.271	13.85	302.28	36.547	1.60345	0.0276243	649.846
768	0.042	2.62	0.008	0	0.196	0.235	4.71	3.13	63.8	34.8	213	61.8	708	132	33.3	12.2	937	1032	12647	28	17	1.21	1	0.5	1224.34	2.67	72.071	1149.6	430.562	1.64706	0.0130203	627.889
769	0.006	6.63	0	0.044	0	0	1.95	0.748	11.2	6.13	40	13	179	41.8	20	23.2	519	198	12468	5.58	3.3	0.954	1	0.5	300.508	6.68	13.898	279.93	41.9057	1.69091	0.0447013	610.759
770	0	5.91	0.032	0	0.368	0	1.49	0.734	11.8	6.18	37.8	11.8	163	37.6	34.7	26.8	898	178	12832	7.34	4.29	1.38	1	0.5	276.714	5.942	14.392	256.38	43.1471	1.71096	0.0298441	637.65
771	0.11	6.32	0.057	0.353	0.34	0	1.64	0.834	15.8	8.8	58.5	18.7	258	66.8	40.1	31.6	1072	270	14227	7.95	4.39	2.24	1	0.5	436.254	6.84	18.614	410.8	60.0585	1.81093	0.0294776	675.519
772	0.063	7.66	0	0	0.41	0.087	1.13	0.693	12.4	6.52	42	13.1	177	48.6	25.4	21.8	674	237	12790	9.85	5.27	1.12	1	0.5	309.663	7.723	14.72	287.22	37.1902	1.86907	0.0323442	622.247
773	0	9.18	0	0	0	0.009	1.34	0.739	14.1	7.71	52.3	16.1	214	58.8	30.6	26.6	795	289	12950	12	6.41	0.678	1	0.5	374.278	9.18	16.188	348.91	38.0076	1.87207	0.0334591	587.259
774	0.002	5.03	0	0	0.28	0	1.37	0.77	15.5	8.69	55.9	16.8	219	56.4	30.9	21.4	801	307	13259	9.46	4.77	0.28	1	0.5	379.742	5.032	17.92	356.79	70.9042	1.98323	0.0267166	531.839
775	0.104	22.3	0.38	6.9	12.7	2.4	64	20.8	247	91.4	381	74.2	623	121	21.4	124	153	2536	7424	4.48	1.02	0.877	1	0.5	1667.18	29.684	346.9	1290.6	43.478	4.39216	0.810458	604.85
776	0.035	12	0	0.441	0	0.262	5.05	2.11	28.1	12.1	66.1	17.2	186	40.4	225	82	688	411	12425	1.4	3.22	1.42	1	0.5	369.798	12.476	35.522	321.8	25.7935	0.434783	0.119186	639.8
777	0.201	23.7	0.095	0.075	1.36	0	6.59	3.55	55.5	27.2	168	44.2	482	106	42.9	107	577	1070	12703	108	59.5	0.491	1	0.5	918.471	24.071	67	827.4	34.3733	1.81513	0.185442	566.174
778	0.329	51	0.158	1.06	2.56	0.703	15.9	6.91	101	46.4	259	66.9	717	145	69.1	247	544	1801	12881	75.1	61.8	2.84	1	0.5	1413.92	52.547	127.073	1234.3	23.4894	1.21521	0.454044	695.246
779	0.265	20.2	0.059	0	0.258	0.356	5.54	3.03	51.7	27.2	165	44.4	494	107	35	88.9	576	1069	13184	122	83	2.02	1	0.5	919.008	20.524	60.884	837.6	40.8108	1.46988	0.15434	667.175
780	0.032	3.84	0.139	0.02	0	0.066	2.32	1.36	29.9	18.5	131	38.1	442	104	24.8	14.2	651	742	13395	146	87.2	1.02	1	0.5	771.277	4.031	33.646	733.6	181.99	1.67431	0.0218126	615.513
781	0.103	84.7	0.089	0.485	0.632	0.075	6.31	3.76	63.7	30.9	169	43.3	450	80	58.4	159	544	900	10042	74.1	51.3	2.22	1	0.5	933.054	85.377	74.477	773.2	9.0563	1.44444	0.292279	674.789
782	0.6	23.1	0.496	4.78	6.1	0.539	28.6	9.85	129	49.3	212	45.8	432	67.6	45.5	87.8	746	1346	7016	20.6	12	0.992	1	0.5	1009.76	28.976	174.089	806.7	27.8403	1.71667	0.117694	613.529
783	0.22	18.4	0.133	1.37	2.24	0.402	15.4	5.41	73.3	29	129	29.1	302	50.7	30.7	76.9	473	826	8000	12.5	4.09	3	1	0.5	656.675	20.123	96.752	539.8	26.825	3.05623	0.162579	699.919
784	0.074	60.1	0.165	1.51	2.18	0.217	8.82	4.34	70.8	33.2	176	46.6	491	79.8	25.4	126	339	854	9898	98.5	98.7	1.58	1	0.5	974.806	61.849	86.357	826.6	13.3648	0.997974	0.371681	647.923
785	0	6.9	0.01	0.057	0.032	0.059	1.05	0.643	10.9	6.11	38.4	12.4	181	44.1	32.6	18.1	806	212	11729	8.39	4.35	1.66	1	0.5	301.661	6.967	12.684	282.01	40.478	1.92874	0.0224566	651.73
786	0	9.57	0	0.141	0.243	0.073	1.38	0.728	12.4	7.47	43.8	13.7	199	45.4	24.5	23.9	598	253	11475	10.1	4.87	0.065	1	0.5	333.905	9.711	14.824	309.37	31.8577	2.07392	0.0399666	454.447
787	0	26.3	0.03	0.522	1.54	0.365	9.67	3.9	55.1	23.4	119	27	257	53.6	17.8	76.7	114	708	10352	3.33	0.973	2.15	1	0.5	577.427	26.852	70.575	480	17.8758	3.4224	0.672807	672.191
788	0	42.5	0.05	0.376	2.46	0.54	19.2	7.29	96.8	40	198	42.4	416	85.9	35.2	176	208	1186	10939	5.52	1.74	2.79	1	0.5	951.516	42.926	126.29	782.3	18.2244	3.17241	0.846154	693.741
789	0	37.5	0.031	0.994	1.77	0.555	14.3	5.33	84	34.4	181	41.2	434	89.1	20	82.6	116	1070	9414	5.12	1.35	2.53	1	0.5	924.18	38.525	105.955	779.7	20.2388	3.79259	0.712069	685.537
790	0	68.7	0.02	0.866	3.93	1.04	26	10.3	149	66.2	347	79.6	824	162	44	175	269	2050	10904	13.5	2.67	2.84	1	0.5	1738.66	69.586	190.27	1478.8	21.2514	5.05618	0.650558	695.246
791	0	23.1	0.06	0.288	1.78	0.215	7.31	3.42	51	20.9	108	24.2	233	49.8	20.8	85.2	129	643	10228	3.68	1.23	0.836	1	0.5	523.073	23.448	63.725	435.9	18.5901	2.99187	0.660465	601.523
792	0	9.17	0.006	0.268	1.07	0.273	3.91	1.23	20.2	8.52	46.1	11.3	113	25.7	5.06	24.9	55	271	11485	1.48	0.33	1.86	1	0.5	240.747	9.444	26.683	204.62	21.6667	4.48485	0.452727	660.619
793	0	0.051	0	0	0	0	0.056	0.101	1.58	1.46	10.3	3.42	38.6	11.9	0.859	0.045	20	55.2	12897	0.91	0.406	0.721	1	0.5	67.468	0.051	1.737	65.68	1287.84	2.24138	0.00225	591.398
794	0	0.022	0	0	0	0	0.102	0.038	1.57	0.968	8.08	2.4	36.7	10.3	0.242	0.125	4.85	39.1	12221	0.574	0.218	0.579	1	0.5	60.18	0.022	1.71	58.448	2656.73	2.63303	0.0257732	576.815
795	0	0.039	0	0	0	0	0.045	0.056	2.22	1.8	12.5	3.91	52.7	14.4	0.936	0.064	16.8	65.2	11375	0.693	0.158	0.49	1	0.5	87.67	0.039	2.321	85.31	2187.44	4.38608	0.00380952	566.044
796	0	0.06	0	0	0	0	0	0.117	0.857	0.862	7.52	2.53	38.2	11.2	0.318	0.605	4.33	37.6	12803	0.31	0.013	0.39	1	0.5	61.346	0.06	0.974	60.312	1005.2	23.8462	0.139723	551.747
797	0.761	22.3	0.438	3.72	4.62	1.22	22.7	7.49	96.8	40.4	202	44.9	441	96.3	12.1	61.4	86.2	1241	9827	3.08	0.954	0.901	1	0.5	984.649	27.219	132.83	824.6	30.295	3.22851	0.712297	606.737
798	0	20.1	0.024	0.297	2.15	0.248	22.1	10.6	169	80.8	440	107	1078	234	94.5	270	665	2570	15002	42.5	11.2	1.33	1	0.5	2164.32	20.421	204.098	1939.8	94.9905	3.79464	0.406015	634.889
799	0.047	11.1	0.046	0.502	1.08	0.123	8.82	3.35	49.3	22.4	118	28.6	290	62.3	14.3	45.4	102	683	12035	4.97	2.03	2.69	1	0.5	595.668	11.695	62.673	521.3	44.5746	2.44828	0.445098	690.663
800	0	21.9	0	0.582	2.31	0.389	21.3	10.6	163	79.3	431	106	1077	224	81.8	235	566	2468	14891	38.3	9.97	1.92	1	0.5	2137.38	22.482	197.599	1917.3	85.2816	3.84152	0.415194	663.13
801	0.029	21.3	0.116	1.27	2.48	0.419	14.1	5.26	72.1	31.3	157	37.1	373	77.8	13.7	58.5	91.5	963	11796	2.69	1.03	0.944	1	0.5	793.274	22.715	94.359	676.2	29.7689	2.61165	0.639344	610.015
802	0.051	7.39	0.138	2.06	0.837	0.164	5.91	2.52	36.8	17.5	96.3	24.1	253	54.4	17.2	42.5	131	553	14442	5.53	2.82	1.9	1	0.5	501.17	9.639	46.231	445.3	46.1977	1.96099	0.324427	662.301
803	1.22	25.1	0.948	7.61	5.87	1.37	22.5	8.79	121	56.3	298	72.7	747	158	54.7	161	389	1768	13772	20.4	5.6	1.05	1	0.5	1526.41	34.878	159.53	1332	38.1903	3.64286	0.413882	617.59
804	0	0.033	0.017	0.042	0	0	0.15	0.095	3.47	2.53	20.6	6.71	81.7	20.4	0.36	0.131	10.3	95.1	13232	0.753	0.349	0.92	1	0.5	135.747	0.092	3.715	131.94	1434.13	2.15759	0.0127184	608.201
805	0.071	1.5	0.003	0.105	0.174	0.057	1.28	0.884	18.5	11	91.4	23.8	313	83.6	13.2	7.78	428	414	10585	10.1	6.47	2.94	1	0.5	545.374	1.679	20.895	522.8	311.376	1.56105	0.0181776	698.191
806	0.01	4.56	0.008	0.035	0.303	0.045	3.34	2.01	40.2	21.8	170	43	549	141	13.8	13	428	767	10536	72	43.5	3	1	0.5	975.311	4.613	45.898	924.8	200.477	1.65517	0.0303738	699.919
807	0.02	2.62	0.009	0.055	0.126	0.03	1.19	0.95	20.6	11.9	100	27.6	370	98.6	21.4	11.2	642	464	10656	33.5	34.5	2.9	1	0.5	633.7	2.704	22.896	608.1	224.889	0.971014	0.0174455	697.023
808	0.005	2.6	0.048	0.066	0.491	0.301	2.62	0.694	5.31	1.08	3.65	0.561	4.05	0.724	6.27	1.8	199	35.6	11828	0.17	0.072	1.25	1	0.5	22.2	2.719	9.416	10.065	3.70173	2.36111	0.00904523	630.284
809	0.136	2.34	0.037	0.29	0.657	0.322	3	0.951	7.52	1.98	7.34	1.11	9.15	2.01	12.9	3.51	445	61.8	13081	0.334	0.295	2.46	1	0.5	36.843	2.803	12.45	21.59	7.70246	1.1322	0.00788764	683.209
810	0.436	38.7	0.148	1.25	1.51	0.79	8.72	2.84	37.1	14.8	79.6	18.2	196	45.5	9.66	375	407	501	10575	1.75	0.52	2.69	1	0.5	445.594	40.534	50.96	354.1	8.73588	3.36538	0.921376	690.663
811	0.689	20.2	0.115	1.23	1.21	0.56	6.33	2.12	27.8	11.4	69.3	14.5	163	38.7	4.45	115	195	385	11318	1.1	0.409	1.85	1	0.5	357.154	22.234	38.02	296.9	13.3534	2.68949	0.589744	660.194
812	0.05	62.3	0.37	3.35	6.46	2.64	42.4	14.3	169	71.9	338	66.8	632	121	19.2	150	96.5	2083	7561	2.1	0.54	3.51	1	1	1530.57	66.07	234.8	1229.7	18.6121	3.88889	1.5544	656.057
813	0.04	67.7	0.77	5.72	12.1	3.7	69	22.4	252	96.9	467	91.2	866	162	24.3	213	160	2924	9161	3.5	0.67	3.47	1	1	2116.53	74.23	359.2	1683.1	22.6741	5.22388	1.33125	655.163
814	0.25	45.6	0.14	2.21	4.31	1.13	39.8	13.7	184	77.5	407	85.3	800	163	30.7	165	201	2450	9876	5	1.36	4.17	1	1	1823.94	48.2	242.94	1532.8	31.8008	3.67647	0.820896	669.716
815	0.02	19.2	0.08	0.71	2.5	0	22.4	9	122	52.5	256	53.4	494	91.9	36.3	119	257	1570	10735	8.63	2.13	4.12	1	1	1123.71	20.01	155.9	947.8	47.3663	4.05164	0.463035	668.746
816	0	48.4	0.1	0.68	2.45	0.66	20.1	8.8	115	50.1	270	58.5	588	119	39.8	200	304	1623	11145	6.45	1.84	5.82	1	1	1281.79	49.18	147.01	1085.6	22.074	3.50543	0.657895	697.316
817	1.65	26	0.6	5.24	3.41	0.1	23.7	8.5	114	47.5	246	51.1	463	90.8	33.2	135	251	1476	11917	10.3	3.26	4.8	1	1	1081.6	33.49	149.71	898.4	26.8259	3.15951	0.537849	681.17
818	0	43.2	0.05	1.24	3.72	0.98	24.4	10.1	124	52.2	266	54	519	101	23.4	124	175	1558	10750	3.21	1	3.24	1	1	1199.89	44.49	163.2	992.2	22.3016	3.21	0.708571	649.846
819	0.31	45.6	0.24	0.72	3.39	0.37	24.1	9.9	130	58.3	295	59.5	580	121	42.6	246	359	1789	11035	7.47	2.04	4.06	1	1	1328.43	46.87	167.76	1113.8	23.7636	3.66176	0.685237	667.57
820	0.02	2.7	0.01	0.16	0.28	0.22	1.44	0.73	12.8	6.7	45.4	12.9	161	46.7	29.2	19.6	787	262	15808	2.7	0.9	5.59	1	1	291.06	2.89	15.47	272.7	94.3599	3	0.0249047	693.892
821	0.01	5.3	0.02	0.24	0.43	0.21	2.99	0.82	12.4	5.94	33.7	7.46	85.7	20.3	23.1	15.9	624	206	14168	1.51	0.45	3.26	1	1	175.52	5.57	16.85	153.1	27.4865	3.35556	0.0254808	650.321
822	0	2.3	0	0	0	0.12	1.15	0.75	12.1	6.93	45.8	13.4	179	46.7	60.3	26.8	1476	279	14470	2.91	0.99	2.48	1	1	308.25	2.3	14.12	291.83	126.883	2.93939	0.0181572	629.691
823	0.57	3.11	0.23	1.85	0.9	0.36	4.37	1.49	19.5	9.01	56	14.8	169	42.4	47	26.4	1318	358	16961	4.15	1.76	6	1	1	323.59	5.76	26.62	291.21	50.5573	2.35795	0.0200303	699.919
824	0	44	0.33	2.54	5.18	1.18	24.1	8.57	111	41.4	203	45.7	425	81.2	12.4	105	73.5	1258	8813	1.76	0.4	3.79	1	1	993.2	46.87	150.03	796.3	16.9895	4.4	1.42857	662.092
825	0	39.4	0.29	1.82	4.33	1.07	21.4	8.34	109	43.3	213	49.5	468	89.6	12.3	87.5	79.3	1312	8672	2.15	0.47	4.14	1	1	1049.05	41.51	144.14	863.4	20.7998	4.57447	1.1034	669.135
826	0.02	83.8	0.17	1.97	4.83	0.88	26	11.3	148	61.1	303	67.9	690	127	35.2	313	226	1840	10840	5.81	1.52	5.99	1	1	1525.97	85.96	191.01	1249	14.53	3.82237	1.38496	699.776
827	0	56.3	0.11	1.3	4.14	0.57	19	7.83	109	42.7	219	53	521	97.5	31.7	224	176	1357	10482	3.35	1.22	4.41	1	1	1131.45	57.71	140.54	933.2	16.1705	2.7459	1.27273	674.238
828	0.34	8.12	0.11	0.41	0.34	0.03	2.27	1.41	22.1	11.4	80.3	26.3	351	93.4	84.8	26.5	2153	462	14785	53.7	22.8	1.58	1	1	597.53	8.98	26.15	562.4	62.6281	2.35526	0.0123084	597.623
829	0.02	4.8	0.02	0	0.14	0.02	1.7	0.99	20	11.2	76.5	25.1	354	92.6	79.7	27.8	2052	442	15812	36.4	18.1	3.82	1	1	587.09	4.84	22.85	559.4	115.579	2.01105	0.0135478	662.717
830	0.05	2.36	0	0.04	0.07	0.02	1.47	0.6	11.2	4.88	27.3	6.88	78.2	16	12	16.9	314	192	13808	1.86	0.67	1.95	1	1	149.07	2.45	13.36	133.26	54.3918	2.77612	0.0538217	612.301
831	0	2.96	0	0	0.02	0.08	1.63	0.68	11.3	4.77	23.3	5.58	60.8	12.2	21.9	16.1	608	178	12834	1.43	0.67	0.63	1	1	123.32	2.96	13.71	106.65	36.0304	2.13433	0.0264803	538.805
832	0	3.32	0	0	0.07	0.02	1.69	0.71	9.88	4.77	26	6.79	73.9	14.8	22.8	23.7	572	183	12811	1.16	0.61	3.35	1	1	141.95	3.32	12.37	126.26	38.0301	1.90164	0.0414336	652.427
833	0	3.34	0	0	0.22	0.23	1.65	0.92	15	6.82	34.2	8.5	89	16.2	20.3	19.7	540	245	13242	1.56	0.63	2.56	1	1	176.08	3.34	18.02	154.72	46.3234	2.47619	0.0364815	632.039
834	0.05	2.46	0.04	0.11	0.15	0.09	1.36	0.92	10.3	4.66	25.2	6.08	65.2	13	21.1	17.6	601	183	13683	1.97	0.63	1.51	1	1	129.62	2.66	12.82	114.14	42.9098	3.12698	0.0292845	594.525
835	0	3.69	0	0.04	0.29	0.08	2.27	1.08	18	8.24	40.1	10.5	107	19.6	22.1	22	585	289	12462	1.79	0.63	1.28	1	1	210.89	3.73	21.72	185.44	49.7158	2.84127	0.0376068	583.413
836	0	3.56	0	0.06	0.1	0.07	1.23	0.73	10.2	4.72	24.9	5.47	62.1	12.3	30.2	20.9	807	185	13029	1.64	0.71	0.64	1	1	125.44	3.62	12.33	109.49	30.2459	2.30986	0.0258984	539.745
837	0.01	4.1	0	0	0.1	0.15	1.3	0.77	13.2	5.95	30.9	8.05	75.3	15.2	20.4	17.3	518	221	13603	1.67	0.7	2.51	1	1	155.03	4.11	15.52	135.4	32.944	2.38571	0.0333977	630.579
838	0	2	0	0	0.11	0.02	0.71	0.4	6.46	2.73	12.7	2.98	31.7	6.3	20.2	10.9	494	102	13616	1.5	0.52	0.63	1	1	66.11	2	7.7	56.41	28.205	2.88462	0.0220648	538.805
839	0.01	3.35	0	0.3	0.07	0.19	2.08	1.04	16.1	7.41	41.6	10.6	110	22.1	26.8	21.9	677	282	13753	1.64	0.71	1.2	1	1	214.85	3.66	19.48	191.71	52.3798	2.30986	0.0323486	579.15
840	0	2.89	0.02	0	0.05	0.06	1.92	0.76	12.8	5.75	30.9	7.32	77.4	16.2	23.4	25.8	567	217	13623	1.69	0.66	4.16	1	1	156.07	2.91	15.59	137.57	47.2749	2.56061	0.0455026	669.522
841	0.02	3.1	0	0.12	0.19	0.05	1.71	0.82	13.1	5.72	28.8	7.48	70.4	13.7	13.2	20.6	330	215	12794	1.66	0.58	1.19	1	1	145.21	3.24	15.87	126.1	38.9198	2.86207	0.0624242	578.601
842	0	2.7	0	0.07	0.04	0.13	0.53	0.62	9.21	3.98	19.9	5.36	53.2	10.3	16.8	12.1	417	152	12343	1.47	0.53	0.83	1	1	106.04	2.77	10.53	92.74	33.4801	2.77358	0.0290168	555.59
843	0.02	3.46	0	0	0.07	0.06	1.08	0.61	8.88	4.13	22.9	6.35	68.7	14.3	46	20.8	1142	164	14357	1.86	0.7	1.23	1	1	130.56	3.48	10.7	116.38	33.4425	2.65714	0.0182137	580.776
844	0.02	2.33	0	0.04	0	0.05	1.33	0.69	9.72	4.53	25.9	7.14	77.6	15.5	12.6	23	312	178	14947	1.48	0.94	1.91	1	1	144.85	2.39	11.79	130.67	54.6736	1.57447	0.0737179	610.833
845	0.02	3.6	0.03	0.06	0.28	0.06	1.73	0.7	12.6	4.95	26.4	6.28	65.3	12.7	10.4	18.4	262	188	11738	1.59	0.47	1.8	1	1	134.71	3.71	15.37	115.63	31.1671	3.38298	0.070229	606.659
846	0	2.7	0	0	0.23	0.06	1.41	0.92	13.2	6.25	33.8	8.28	90.8	18.6	15.4	19.3	397	236	13470	2.4	0.79	1.58	1	1	176.25	2.7	15.82	157.73	58.4185	3.03797	0.0486146	597.623
847	0	5.31	0	0.07	0.14	0.17	2.33	0.9	15.6	6.96	29.8	7.3	75.2	14.6	45.6	33.5	1145	241	13412	1.21	0.3	0.82	1	1	158.38	5.38	19.14	133.86	24.881	4.03333	0.0292576	554.838
848	0	3.24	0	0.07	0.19	0.07	1.29	0.72	10.2	4.71	26.2	6.91	65.9	13.5	16.5	19.5	412	184	12486	1.37	0.54	1.06	1	1	133	3.31	12.47	117.22	35.4139	2.53704	0.0473301	571.074
849	0	4.01	0.01	0	0.18	0.15	1.48	0.52	8.35	3.58	17.7	4.24	42.8	8.11	36.7	22.8	855	141	13300	1.46	0.46	1.85	1	1	91.13	4.02	10.68	76.43	19.0124	3.17391	0.0266667	608.582
850	0	4.23	0.02	0.12	0.28	0.13	2.43	1.12	16.7	7.5	38.8	10.2	99.1	19.8	19.7	26.9	508	288	12822	1.76	0.53	0.86	1	1	200.43	4.37	20.66	175.4	40.1373	3.32075	0.0529528	557.803
851	0	3.28	0	0	0.15	0.07	1.26	0.59	9.16	4.08	23.2	5.62	61.2	12.1	16	21.5	363	157	12364	1.14	0.6	1.06	1	1	120.71	3.28	11.23	106.2	32.378	1.9	0.0592287	571.074
852	0.07	3.3	0	0.13	0	0.1	1.41	0.75	11.9	5.4	32.4	8.83	100	22.1	57.7	28.2	1507	215	16491	3.66	1.44	1.11	1	1	186.39	3.5	14.16	168.73	48.2086	2.54167	0.0187127	574.057
853	0.03	4.73	0	0.06	0.19	0.12	1.93	0.84	12.8	5.03	25.2	6.14	60.4	11.7	33.3	27.8	856	198	14349	1.4	0.61	2.11	1	1	129.17	4.82	15.88	108.47	22.5041	2.29508	0.0324766	617.931
854	0	2.45	0.01	0.06	0.14	0.06	0.71	0.52	7.51	3.71	19.8	5.57	57.9	12.4	13.6	26	327	141	14392	2.03	0.86	1.53	1	1	110.84	2.52	8.94	99.38	39.4365	2.36047	0.0795107	595.423
855	0	3.6	0	0	0.25	0.06	1.21	0.8	13	5.54	34.8	8.75	89.3	17.8	26.7	22.1	696	235	13052	1.61	0.52	0.43	1	1	175.11	3.6	15.32	156.19	43.3861	3.09615	0.0317529	516.644
856	0.01	1.2	0.03	0	0.23	0.08	1.7	0.91	17	9.3	54	15	179	39	15	4.5	542	332	13000	2.8	2.2	1.1	1	0.5	317.46	1.24	19.92	296.3	238.952	1.27273	0.00830258	620.942
857	0	1.2	0	0	0.18	0.06	1.1	0.75	13	7.2	42	11	130	29	15	4.2	538	277	13900	1.9	1.4	0.95	1	0.5	235.49	1.2	15.09	219.2	182.667	1.35714	0.00780669	610.462
858	0.04	1.2	0	0.22	0.05	0.06	0.95	0.61	12	6.6	37	10	106	24	16	4.2	638	248	13900	3	1.9	1.9	1	0.5	198.73	1.46	13.67	183.6	125.753	1.57895	0.00658307	662.301
859	0.03	1.2	0	0.03	0	0.06	1.3	1.1	18	9.6	52	13	144	33	18	6.2	672	349	13700	3	1.7	0.98	1	0.5	273.32	1.26	20.46	251.6	199.683	1.76471	0.00922619	612.664
860	0	1.3	0	0.08	0.23	0.11	1.6	0.98	17	8.8	54	14	153	34	17	4.8	661	348	13600	2.3	1.5	1.3	1	0.5	285.1	1.38	19.92	263.8	191.159	1.53333	0.00726172	633.19
861	0	0.86	0.01	0	0.27	0.05	1.6	0.75	14	6.9	36	7.7	79.9	17	11	3	436	255	14600	2.2	2.8	2	1	0.5	165.04	0.87	16.67	147.5	169.54	0.785714	0.00688073	666.38
862	0	0.42	0	0.15	0	0.18	2.6	1.8	36	19	114	29	321	67	7.7	4.9	306	658	11000	4.3	1.3	0.84	1	0.5	591.15	0.57	40.58	550	964.912	3.30769	0.0160131	601.854
863	0.14	0.69	0.03	0.25	0.36	0.06	0.44	0.29	7.1	4.4	33	10	123	29	2.1	7.4	81	183	12300	1.3	0.65	1.3	1	0.5	208.76	1.11	8.25	199.4	179.64	2	0.091358	633.19
864	0	0.03	0	0.1	0.15	0	0.2	0.47	12	6.8	46	13	149	32	2.9	0.16	116	281	11200	1.4	0.56	0.87	1	0.5	259.75	0.13	12.82	246.8	1898.46	2.5	0.00137931	604.291
865	0	0	0	0	0	0	0.23	0.18	6.1	4.2	37	12	169	39	2.1	0.1	82	190	13100	1.2	0.44	0.23	1	0.5	267.71	0	6.51	261.2	0	2.72727	0.00121951	520.469
866	0.02	0.045	0	0	0	0	0.35	0.6	14	10	69	20	240	54	6	0.56	239	408	12500	2.7	1.1	0.25	1	0.5	408.015	0.065	14.95	393	6046.15	2.45455	0.0023431	525.249
867	0.02	0.04	0	0	0	0.04	0.38	0.66	14	7.6	44	12	127	27	3	0.5	124	287	11300	1.3	0.6	1.7	1	0.5	232.74	0.06	15.08	217.6	3626.67	2.16667	0.00403226	653.577
868	0.03	0.02	0.01	0.04	0	0.04	0.29	0.32	7	5.2	38	11	132	30	2	0.23	81	211	12900	0.81	0.45	0.42	1	0.5	223.95	0.1	7.65	216.2	2162	1.8	0.00283951	556.335
869	0	0.01	0	0.07	0	0	0.33	0.25	6.7	5	38	12	147	33	2.6	0.45	105	210	12700	0.92	0.49	0.94	1	0.5	242.36	0.08	7.28	235	2937.5	1.87755	0.00428571	609.715
870	0.01	0.06	0	0.18	0	0	0.14	0.22	7.9	5.8	45	14	168	39	2.8	0.17	109	247	12700	1.1	0.54	0.3	1	0.5	280.31	0.25	8.26	271.8	1087.2	2.03704	0.00155963	535.905
871	0	0.04	0	0.13	0.17	0	0.31	0.41	12	8.3	62	18	216	49	2.4	0.2	94	344	12600	1.2	0.52	0.43	1	0.5	366.36	0.17	12.89	353.3	2078.24	2.30769	0.00212766	557.803
872	0.03	55	0.18	4	7.5	1.9	31	10	118	46	211	48	467	98	20	138	118	1392	9600	2.1	0.51	2.4	1	0.5	1097.61	59.21	168.4	870	14.6935	4.11765	1.16949	681.17
873	0.04	90	0.04	1.2	4.7	1.1	37	15	217	93	455	104	974	182	43	221	259	2679	11600	14	2.7	1.5	1	0.5	2174.08	91.28	274.8	1808	19.8072	5.18519	0.853282	643.952
874	0	40	0.31	6.2	10	4.5	50	14	153	56	249	52	479	95	7.4	57	43	1599	8700	0.6	0.16	2.8	1	0.5	1209.01	46.51	231.5	931	20.0172	3.75	1.32558	694.044
875	0	0.52	0	0.1	0.08	0.39	4.2	3	53	29	162	43	456	91	11	7.5	456	968	16800	4.6	2.3	2.2	1	0.5	842.29	0.62	60.67	781	1259.68	2	0.0164474	674.054
876	0	0.8	0.01	0.24	0.38	0.37	5.6	4.4	91	47	269	72	755	156	9.7	8.1	378	1610	1030	4.1	0.93	1.8	1	0.5	1401.8	1.05	101.75	1299	1237.14	4.4086	0.0214286	658.039
