# Supplementary material for: New machine learning models on reevaluation of the Ti-in-zircon thermometer via multivariate trace elements
Source: Royal Society of Chemistry journal article supplement (doi:10.1039/d4ja00352g), 2024-11-20
Supplement: d4ja00352g1.zip [file TableS4.middleT_1180.xlsx]

## Sheet: middleT_1180
entry_id	la_ppm	ce_ppm	pr_ppm	nd_ppm	sm_ppm	eu_ppm	gd_ppm	tb_ppm	dy_ppm	ho_ppm	er_ppm	tm_ppm	yb_ppm	lu_ppm	pb_ppm	th_ppm	u_ppm	y_ppm	hf_ppm	nb_ppm	ta_ppm	ti_ppm	α(SiO2)	α(TiO2)	REE	LREE	MREE	HREE	HREE/LREE	Nb/Ta	Th/U	T(℃)
1	0.99	5.92	0.64	5.06	8.17	0.7	48.7	17.8	223	85.5	383	78.6	700	132	405	33.2	22.3	2570	11800	1.65	1.12	17.8	1	1	1690.08	12.61	298.37	1379.1	109.366	1.47321	1.48879	802.943
2	8.39	57.9	9.41	71.9	44.5	24	89.9	16.5	123	32.5	105	16	129	24.6	34.03	70.6	7.18	1050	17884	1.48	0.45	26.4	1	1	752.6	147.6	297.9	307.1	2.08062	3.28889	9.83287	845.889
3	0.27	5.95	0.58	4.48	3.07	6.02	14.4	4.84	65	25.2	130	27.8	338	67.5	57.5	13.7	909	1056	12751	0.94	0.35	7.41	1	1	693.11	11.28	93.33	588.5	52.172	2.68571	0.0150715	718.343
4	0.55	7.74	1.23	12.9	14.6	1.07	73.1	25.6	335	123	589	116	1219	197	104	144	460	3917	12752	1.47	0.84	8.45	1	1	2715.79	22.42	449.37	2244	100.089	1.75	0.313043	730.164
5	0.1	1.37	0.18	1.37	1.49	1.81	10.1	2.85	22.4	5.67	21.4	3.86	41.2	7.6	18.7	16.3	294	205	12945	0.3	0.1	7.08	1	1	121.4	3.02	38.65	79.73	26.4007	3	0.0554422	714.308
6	0.061	0.7	0.059	0.54	0.37	0.26	2.84	0.99	11.7	4.26	22.1	4.75	59.5	12.7	19.7	14.3	261	167	12103	0.84	0.24	13.9	1	1	120.83	1.36	16.16	103.31	75.9632	3.5	0.0547893	777.641
7	0.027	0.58	0.029	0.53	1.36	1.46	11.1	2.94	21.7	5.87	25.5	5.22	62.2	12	23.2	13.4	314	217	12794	0.42	0.09	9.97	1	1	150.516	1.166	38.56	110.79	95.0172	4.66667	0.0426752	745.46
8	0.073	1.55	0.35	2.75	1.89	3.93	9.09	3.42	46.3	17.2	84	17.3	202	39.9	81.1	5.31	723	683	12730	0.91	0.24	6.79	1	1	429.753	4.723	64.63	360.4	76.3074	3.79167	0.0073444	710.632
9	0.043	0.17	0.004	0	0.27	0.029	0.66	0.24	3.82	2.64	18	5.49	69	19.5	8.76	0.26	109	96.2	12793	0.27	0.1	20.5	1	1	119.866	0.217	5.019	114.63	528.249	2.7	0.00238532	817.946
10	0.009	0	0.026	0	0.2	0.006	0.64	0.37	9.78	7.09	53.1	17.8	231	59.9	9.5	0.09	121	248	24360	4.44	2.26	7.38	1	1	379.921	0.035	10.996	368.89	10539.7	1.9646	0.000743802	717.983
11	2.25	9.84	1.56	11.2	9.42	1.16	17.3	3.68	33.6	12.4	60	13.8	146	36.9	41.9	9.91	525	414	14932	0.57	0.15	6.73	1	1	359.11	24.85	65.16	269.1	10.829	3.8	0.0188762	709.855
12	0.186004	0	0.00489459	0.433231	0	0	0.0359847	0.00543301	0.0215164	0.013756	0.0467647	0.0128007	0.1659	0.0378014	0.0321686	0.00849224	0.217851	0.398001	0.0100137	0.149715	0.00631815	8.23425	0.5	0.5	0.964086	0.624129	0.0629341	0.277022	0.443854	23.6961	0.0389818	727.814
13	0.00587699	0.00884596	0	0.0215731	0	0.00480191	0.0179021	0	0	0.0109555	0.00775064	0.0101872	0.16511	0.0361049	0.048312	0	0	0.0221459	0.00996778	0.013223	0.00942455	15.234	0.5	0.5	0.289109	0.036296	0.0227041	0.230109	6.33977	1.40304	0	786.877
14	0.0113518	0.00404955	0	0.0277924	0	0.0185302	0.0691198	0.0033726	0	0.00705354	0.0398776	0.00327706	0	0.0180978	0.0496113	0.00458019	0.00834518	0.0366047	0	0.0127469	0	7.64283	0.5	0.5	0.202522	0.0431938	0.0910226	0.068306	1.58138	0	0.548842	721.103
15	0	0	0.00739382	0.043749	0	0.0145621	0	0.00796282	0	0.00147972	0.0156686	0.00515234	0.075782	0.0157171	0.0490651	0.00337672	0.00656963	0.0479168	0.0100954	0.00511607	0	11.6489	0.5	0.5	0.187468	0.0511428	0.022525	0.1138	2.22514	0	0.51399	760.283
16	0.00856242	0.00572501	0	0	0	0	0	0.00254624	0.0206474	0	0	0.00246715	0.0726241	0.0241732	0.0437921	0.00323551	0	0.0368658	0	0.0287113	0.00303959	10.2658	0.5	0.5	0.136746	0.0142874	0.0231936	0.0992645	6.94768	9.44576	0	748.212
17	0.00595841	0.0164945	0	0.0436362	0.0175452	0.00971073	0.036282	0.00265053	0.0107936	0.00832155	0	0.00257906	0.0334009	0.0281666	0.0521254	0.0134603	0.00827248	0.017749	0	0.0184864	0.00168889	17.9713	0.5	0.5	0.215539	0.0660891	0.0769821	0.0724681	1.09652	10.9459	1.62712	803.948
18	0.00296196	0.000197353	0.00490755	0.043291	0	0.0048313	0.0541548	0.00263131	0	0.00826946	0.00781963	0	0.0342948	0.00168464	0.0651188	0.0100195	0.00172451	0.0511947	0	0.016643	0.00629227	8.57622	0.5	0.5	0.165044	0.0513579	0.0616174	0.0520686	1.01384	2.64499	5.81006	731.517
19	0.034522	0.0111115	0.00984979	0.00230264	0	0	0	0.0169283	0.00742346	0	0.0586487	0.0144509	0.0936651	0.0525424	0.139351	0	0.00918035	0.0101162	0.00502587	0.0125118	0.0045562	8.79983	0.5	0.5	0.301445	0.0577859	0.0243517	0.219307	3.79517	2.74611	0	733.873
20	0.0403446	0	0	0.00258939	0	0	0	0.019035	0	0	0.0373491	0	0.0362868	0.0206643	0.0787161	0.0106418	0	0.0227243	0	0.0281013	0.00512042	7.29068	0.5	0.5	0.156269	0.042934	0.019035	0.0943002	2.1964	5.4881	0	716.902
21	0.060307	0.00802193	0.00146324	0.00664307	0.0589328	0	0.00237954	0	0	0.00883598	0	0.0069447	0.0450536	0	0.0908897	0.00330953	0.0458527	0.0291143	0.0272062	0.00899946	0.00155672	17.1944	0.5	0.5	0.198582	0.0764353	0.0613123	0.0608343	0.795893	5.78104	0.0721775	799.329
22	0.0409524	0.00587607	0.00146324	0	0	0.0345933	0	0.0357486	0	0	0.0077277	0	0	0.00276827	0.302311	0	0	0	0.00996298	0.0263197	0.00939711	16.5246	0.5	0.5	0.136508	0.0556697	0.0703419	0.010496	0.18854	2.80083	0	795.21
23	0.117144	0.0744291	0.0777051	0.00821248	0	0.0291863	0.00807999	0	0	0	0.0130526	0.0011444	0.0278309	0.0233945	0.607492	0.00561423	0.0436844	0	0.0168295	0.00555267	0	6.48693	0.5	0.5	0.380179	0.277491	0.0372663	0.0654224	0.235764	0	0.128518	706.65
24	0.121395	0.0290247	0.0824232	0.0213581	0.0472693	0.0189848	0	0	0	0	0.0150053	0	0	0.00162471	0.839729	0.00364475	0.097456	0	0	0	0	35.4001	0.5	0.5	0.337085	0.2542	0.0662541	0.0166301	0.065421	0	0.0373989	880.143
25	0.0558597	0.0246293	0.0395174	0.00509909	0	0	0	0.056256	0	0	0	0.0159959	0.0690187	0.0320457	0.301729	0	0.0168497	0.0334755	0.00870616	0.0345488	0.847945	8.79911	0.5	0.5	0.298422	0.125105	0.056256	0.11706	0.935693	0.0407441	0	733.865
26	0.0233439	0.0044131	0.00862617	0.0035771	0	0.0509326	0.00704375	0	0.00383333	0	0	0	0.0967284	0.0245757	0.481669	0.00973028	0.00470652	0	0	0.0071206	0.00213945	9.39451	0.5	0.5	0.223074	0.0399603	0.0618097	0.121304	3.03562	3.32824	2.0674	739.909
27	0.0487411	0.015953	0.0400391	0	0.0462277	0.0377675	0	0	0	0.0089208	0	0.00275633	0	0.00905476	0.149431	0.0107177	0.151979	0	0.0326181	0	0	6.60378	0.5	0.5	0.20946	0.104733	0.0839952	0.0207319	0.197949	0	0.0705212	708.203
28	0.048515	0.0231983	0.0330871	0	0	0.032716	0	0.0168442	0.00246918	0	0.0219811	0	0.015399	0	0.150238	0	0.0391943	0.0200734	0.00939155	0.00313161	0	7.87746	0.5	0.5	0.19421	0.1048	0.0520294	0.0373801	0.356679	0	0	723.815
29	0.0271415	0.00312199	0.0105264	0.00256389	0	0.0184017	0	0	0.00277632	0.00290389	0.0082506	0.00815134	0	0.0117715	0.108587	0	0.0848913	0.0112178	0	0	0	6.01315	0.5	0.5	0.0956091	0.0433537	0.0211781	0.0310773	0.716832	0	0	700.106
30	0.0531773	0.0130687	0.0283789	0.00536022	0	0.0384949	0	0.0199088	0.0029025	0	0.00593157	0	0.0125812	0.0030846	0.0593406	0	0.00487062	0.0197497	0.0110731	0	0.00344204	8.04322	0.5	0.5	0.182889	0.0999852	0.0613062	0.0215974	0.216006	0	0	725.691
31	0.0391719	0.0230076	0.0515947	0.0053863	0.0712697	0.0193528	0.0212517	0.0400499	0.0116678	0.0091625	0.0086729	0	0.0737165	0	0.253774	0	0	0.0234752	0.0222786	0.0184246	0	9.20979	0.5	0.5	0.374304	0.119161	0.163592	0.0915519	0.768307	0	0	738.068
32	0.0174127	0	0.00815122	0	0.00597429	0	0.0397108	0.0494277	0	0	0.0213634	0	0	0.000765251	0.0747697	0.00921456	0	0	0	0.00909189	0.00086596	31.2247	0.5	0.5	0.142805	0.025564	0.0951129	0.0221286	0.865619	10.4992	0	865.234
33	0.0174755	0.0163029	0	0	0	0.019171	0.00530802	0	0.00290653	0	0	0	0	0.00307189	0.0928788	0.0073826	0.003593	0.0471742	0.0331724	0	0.00531904	33.6062	0.5	0.5	0.0642358	0.0337783	0.0273856	0.00307189	0.0909425	0	2.05472	873.918
34	0.0187355	0.0174397	0.0145526	0	0	0	0	0	0	0	0	0	0	0.00420628	0.0674473	0	0.00809257	0	0	0	0	33.5446	0.5	0.5	0.0549341	0.0507278	0	0.00420628	0.0829185	0	0	873.7
35	0.00335986	0.00934105	0.0186787	0	0	0.0367043	0.00507736	0.0569124	0.00276745	0	0	0.00269714	0.046527	0	0	0	0.0136147	0	0	0.00349664	0.00330806	25.6585	0.5	0.5	0.182065	0.0313796	0.101462	0.0492241	1.56867	1.057	0	842.67
36	0.00846563	0.00390971	0.000260302	0	0	0	0	0.0238414	0.00346983	0	0.0103341	0	0	0.00742526	0.0517514	0	0.00851309	0	0.000884966	0	0	27.1488	0.5	0.5	0.0577062	0.0126356	0.0273112	0.0177593	1.4055	0	0	849.066
37	0.02	5.86	48.098	0.62	38.6402	7.37178	49.1702	11.3261	112.89	37.87	156.072	32.9457	306.438	51.1958	7.80388	193.157	260.786	1094.47	9440.02	6.62563	2.00007	10.4113	1	0.5	858.518	54.598	219.398	584.522	10.7059	3.31269	0.740671	819.631
38	0.479854	11.5194	0.220981	2.78962	4.51957	1.7607	26.2404	9.63454	123.726	51.6396	239.275	57.0447	567.204	99.3362	3.78087	76.9054	132.294	1486.23	7991.35	1.78032	0.623003	11.7277	1	0.5	1195.39	15.0098	165.881	1014.5	67.5891	2.85764	0.581323	832.648
39	0.00580953	21.0192	0.0498655	1.25788	3.04376	1.04112	13.4182	4.36806	47.208	16.6984	67.8843	15.2024	148.202	24.262	1.21088	32.5375	40.1044	478.202	9017.68	0.906801	0.47586	11.6133	1	0.5	363.661	22.3328	69.0792	272.249	12.1905	1.9056	0.811322	831.564
40	0.0059049	28.8555	0.280693	4.47158	7.77522	1.99986	30.1322	8.82455	99.3161	34.6335	153.689	36.0215	355.819	61.5957	4.09821	160.092	118.661	1033.44	10055.4	1.15633	0.600524	3.9865	1	0.5	823.421	33.6137	148.048	641.759	19.0922	1.92553	1.34916	724.9
41	0.00553792	40.0827	0.0981894	2.03956	3.83046	1.45124	18.9329	6.53095	82.1228	32.5509	152.898	37.9622	403.934	75.1188	5.67851	191.251	175.468	1002.86	9616.12	3.47568	1.10667	8.12973	1	0.5	857.557	42.226	112.868	702.463	16.6358	3.14066	1.08995	793.542
42	0.0114342	40.0648	0.0883327	1.69929	3.5859	1.8433	22.9081	7.53838	89.8577	31.5747	138.277	31.9253	334.017	62.0396	12.2376	431.914	355.076	992.165	11156.6	3.43447	0.930327	3.17671	1	0.5	765.432	41.8639	125.733	597.834	14.2804	3.69168	1.2164	704.847
43	0	16.6856	0.11851	2.14191	4.908	2.15032	29.0581	10.522	133.269	51.4696	236.862	53.8307	533.816	96.3695	2.33453	60.1712	74.1855	1527.8	7730.87	2.12213	0.644158	9.06248	1	0.5	1171.2	18.946	179.907	972.347	51.322	3.29442	0.811091	804.842
44	59.9276	143.361	16.3359	78.7314	18.2659	1.49979	28.5687	7.76031	81.3322	28.832	130.808	29.5961	292.085	49.8108	7.04752	170.772	196.583	865.304	9144.77	1.72934	0.752268	11.239	1	0.5	966.915	298.355	137.427	531.132	1.7802	2.29883	0.8687	827.959
45	0.024264	14.3593	0.187322	3.06558	4.23981	0.78359	15.6486	4.42126	44.9818	16.8384	69.3044	15.7941	161.069	27.6361	2.94609	50.2684	68.9926	470.781	7491.02	0.908691	0.409468	20.4519	1	0.5	378.354	17.6365	70.0751	290.642	16.4796	2.2192	0.728605	897.8
46	0.0241599	6.82019	0.324635	5.61326	8.7209	0.471851	37.6331	12.8289	143.952	50.389	210.908	45.2138	412.488	65.255	10.624	141.325	237.906	1398.6	9043.78	0.961935	0.585182	11.1804	1	0.5	1000.64	12.7822	203.607	784.254	61.3549	1.64382	0.594037	827.386
47	0.0359111	112.976	0.507031	8.33821	14.3145	5.47774	68.3477	21.8573	243.396	85.1114	349.282	75.2524	699.005	111.005	10.5086	307.197	181.358	2376.35	7997.87	8.02488	2.07238	7.81407	1	0.5	1794.91	121.857	353.394	1319.66	10.8296	3.8723	1.69387	789.48
48	0.375376	30.3942	0.187867	1.90242	2.77948	0.809894	11.6188	3.69807	41.0088	16.4753	81.2632	20.2938	232.658	50.2655	35.2859	566.868	685.382	569.416	10787.6	1.77519	0.426801	8.81639	1	0.5	493.731	32.8599	59.9151	400.956	12.202	4.15929	0.827084	801.955
49	0.0115099	10.614	0.0790099	1.82372	3.45366	0.800948	17.4942	5.75966	69.5133	25.7288	115.4	26.0289	259.523	44.1316	6.03985	90.1078	127.743	773.008	9559.15	0.980989	0.66232	14.8918	1	0.5	580.363	12.5283	97.0218	470.813	37.58	1.48114	0.705386	859.721
50	0.707019	11.8392	0.394052	5.60957	7.93979	2.15336	30.3535	8.73135	91.3622	29.995	119.951	25.5828	238.545	39.0784	3.13492	55.3217	64.8203	812.783	8027.07	0.772128	0.378088	13.4676	1	0.5	612.242	18.5499	140.54	453.152	24.4289	2.04219	0.853462	848.167
51	0.017448	34.48	0.162909	3.02948	5.26046	2.44439	27.2655	8.4143	96.5502	35.0079	150.59	32.6085	314.468	51.5712	6.17325	216.103	96.8579	1009.89	7729.93	1.54013	0.693511	15.6755	1	0.5	761.87	37.6898	139.935	584.246	15.5014	2.22078	2.23113	865.708
52	0.0239921	13.9516	0.0446289	0.911538	1.78982	0.754674	8.26123	3.14167	36.6001	13.7149	64.0606	15.6707	160.665	29.3738	3.60806	55.245	75.1136	416.147	8187.44	0.774259	0.493171	14.5786	1	0.5	348.964	14.9318	50.5475	283.484	18.9853	1.56996	0.735487	857.258
53	26.6132	66.1662	6.38651	31.6708	12.1488	0.694377	40.7616	13.6801	160.856	61.4433	272.422	63.1155	609.86	103.714	15.6148	239.16	308.967	1770.58	10190.5	4.58955	1.79024	4.4534	1	0.5	1469.53	130.837	228.141	1110.56	8.4881	2.56364	0.774063	734.983
54	1.24625	24.5236	0.469858	5.52572	8.66713	0.967324	37.997	12.9615	149.815	54.1601	232.956	53.0267	510.027	82.0105	12.3677	231.092	249.588	1550.63	10566	2.81427	0.924802	5.27638	1	0.5	1174.35	31.7655	210.408	932.181	29.3457	3.04311	0.925894	750.821
55	0.00560417	1.98596	0.0545416	1.28678	4.37533	0.0896582	33.7467	14.5753	195.984	74.1712	336.297	74.608	705.044	114.053	11.7925	68.8433	256.502	2172.36	11049	1.34881	0.835484	5.1648	1	0.5	1556.28	3.33288	248.771	1304.17	391.305	1.6144	0.268393	748.797
56	0.0169193	28.1436	0.409648	6.70776	11.5516	2.96048	57.8901	18.7159	231.434	84.8754	382.629	87.1549	833.809	142.223	11.1826	215.962	190.241	2461.34	8891.89	2.37165	0.674495	4.33646	1	0.5	1888.52	35.2779	322.552	1530.69	43.3895	3.51618	1.1352	732.542
57	11.7433	48.8199	2.9003	12.7901	4.11368	0.720099	14.6776	4.96213	64.4179	25.2502	121.16	31.5718	333.45	60.1998	10.5978	155.038	192.036	767.587	10932	1.86651	0.718202	4.09849	1	0.5	736.776	76.2537	88.8914	571.631	7.49644	2.59887	0.80734	727.403
58	0	13.2315	0.0564023	0.791759	2.17568	0.503431	11.3705	3.99612	49.2597	20.0497	92.3938	22.1457	224.098	39.5186	2.34495	42.2745	40.2493	588.954	9567.91	1.07941	0.517197	7.54658	1	0.5	479.591	14.0796	67.3055	398.206	28.2824	2.08704	1.05032	785.934
59	0.0115537	42.7519	0.135527	2.71229	6.25185	3.15449	34.8531	12.3454	155.094	60.7586	282.378	66.4454	687.627	124.097	3.82383	92.9677	58.6403	1798.07	7912.58	2.25516	0.493326	8.08641	1	0.5	1478.62	45.6113	211.698	1221.31	26.7764	4.57134	1.58539	792.992
60	66.2562	175.646	20.6692	103.077	22.9715	1.08343	36.1646	9.86011	109.121	41.1568	188.857	44.3337	449.925	75.1491	13.6473	190.114	244.383	1222.36	11926.4	5.76929	2.11486	5.26986	1	0.5	1344.27	365.649	179.2	799.422	2.18631	2.72797	0.777936	750.703
61	0.00566488	42.8935	0.0356229	1.02833	2.96212	1.43789	19.438	7.15137	97.1974	43.5253	222.681	59.7556	690.411	130.138	13.7331	244.585	221.811	1388.92	10182.1	6.97166	1.71784	3.95039	1	0.5	1318.66	43.9632	128.187	1146.51	26.0789	4.05839	1.10267	724.081
62	0	24.77	0.0411748	0.995096	2.2936	0.946087	12.1091	4.83363	67.0192	29.6865	149.397	41.1823	472.112	92.6704	12.1157	178.684	197.151	927.877	10653.8	4.15181	1.51872	3.69834	1	0.5	898.056	25.8063	87.2016	785.048	30.4208	2.73375	0.906329	718.183
63	0.0174561	26.2336	0.0532316	0.90456	2.24472	0.438231	10.1563	3.93607	48.2334	19.3804	94.0757	23.3442	254.689	47.7567	16.1758	224.809	209.122	593.334	10477.2	2.36305	1.11143	6.09632	1	0.5	531.464	27.2088	65.0087	439.246	16.1435	2.12613	1.07501	764.71
64	0.0055638	12.573	0.0700482	1.1463	2.48982	0.657351	14.1726	3.83753	46.8803	17.3548	82.3072	19.5868	203.447	36.2393	14.5943	141.246	166.106	538.705	9452.59	0.558553	0.532859	13.1132	1	0.5	440.768	13.7949	68.0375	358.935	26.0194	1.04822	0.850334	845.142
65	0	3.29373	0.029782	0.781421	1.79128	0.292374	17.3398	6.54655	81.1542	27.4303	114.65	24.6081	217.936	33.8458	41.2042	43.4596	291.926	831.998	12228.2	1.63102	1.38609	7.85451	1	0.5	529.699	4.10494	107.124	418.47	101.943	1.1767	0.148872	790.008
66	0	5.05537	0.0267992	0.714917	2.26231	0.152027	14.909	6.69818	92.4971	36.9122	174.289	42.8575	422.207	71.4564	38.9993	65.3417	236.56	1107.05	12506.3	2.25663	1.33913	6.28547	1	0.5	870.038	5.79709	116.519	747.722	128.982	1.68515	0.276217	767.696
67	0.0164747	15.5909	0.0879514	1.50288	2.4346	1.13258	12.3154	4.35276	52.9492	21.1434	104.234	26.7446	292.227	54.8094	25.9581	66.3421	87.591	667.333	10129.6	0.551123	0.194255	5.75946	1	0.5	589.541	17.1982	73.1846	499.158	29.0238	2.83711	0.757407	759.199
68	0.0105539	13.7423	0.0392478	0.962605	1.79558	0.24185	12.616	4.8007	61.3185	23.7504	108.147	25.4559	240.859	42.1095	57.5251	112.114	169.571	697.793	10438.7	1.96733	1.23097	7.75303	1	0.5	535.849	14.7547	80.7727	440.322	29.8428	1.59819	0.661163	788.68
69	0.00580365	11.386	0.102594	1.96141	4.1672	0.134845	18.8572	6.33062	73.2828	26.3621	111.942	24.3282	223.284	36.5406	16.1833	36.0627	43.7535	727.605	10051.4	5.11122	1.52443	11.5516	1	0.5	538.686	13.4558	102.773	422.457	31.3959	3.35287	0.824225	830.976
70	0.0116124	12.6337	0.112882	2.00135	4.03393	0.135058	22.6182	7.16407	80.471	28.9791	123.331	26.1889	242.702	38.7651	14.9228	32.0532	39.8346	783.369	9783.58	4.79017	1.55077	10.749	1	0.5	589.148	14.7595	114.422	459.966	31.1641	3.08891	0.804656	823.091
71	0.0112365	4.74418	0.0867726	1.57543	2.87757	0.0577124	13.8489	4.74866	54.5095	19.8412	87.3102	18.8803	176.355	27.859	44.5368	84.8139	118.02	581.692	11482.5	1.15458	0.753511	15.7158	1	0.5	412.706	6.41762	76.0423	330.246	51.4592	1.53226	0.718641	866.009
72	0.0116118	7.90909	0.169487	3.01943	4.64273	0.185477	20.7914	6.35363	76.3046	26.7763	114.505	24.6653	236.84	38.1504	11.1142	27.695	27.8987	749.985	9471.06	2.5631	0.967465	17.2855	1	0.5	560.324	11.1096	108.278	440.937	39.6896	2.6493	0.992697	877.298
73	0	8.09586	0.0159325	0.583022	1.54621	0.114842	6.51698	2.47197	31.5862	12.6102	60.0769	14.0069	144.365	23.7654	22.0044	26.1576	61.2065	354.144	11347.2	4.12596	2.2583	8.03142	1	0.5	305.755	8.69481	42.2362	254.824	29.3076	1.82702	0.427365	792.291
74	0.00579736	15.1588	0.102794	1.99482	4.14224	0.0807937	20.7225	6.87624	80.8521	30.281	129.805	29.5171	277.019	44.2222	21.2253	43.9705	54.8493	828.169	11043.9	6.63252	2.3528	10.5117	1	0.5	640.78	17.2622	112.674	510.844	29.5933	2.81899	0.801661	820.669
75	0.00556853	14.3318	0.0892451	1.84292	4.06924	0.10462	23.5435	7.16745	86.1653	29.4443	128.359	27.8222	249.617	39.6993	18.9675	37.1602	50.1022	818.167	10016	5.67098	1.71027	8.26636	1	0.5	612.261	16.2696	121.05	474.942	29.1921	3.31584	0.741689	795.26
76	0.00597855	8.75081	0.0375922	1.5156	3.10437	0.0887183	12.9106	3.88899	47.2927	16.6521	74.2893	16.9933	150.823	25.4023	20.704	34.1954	55.819	471.451	10443.8	3.68418	1.38083	10.9407	1	0.5	361.755	10.31	67.2854	284.16	27.5616	2.66809	0.612612	825.015
77	0.02	5.86	0.05	0.62	1.44	5.50399	209.31	31.2681	213.971	56.481	200.195	39.8673	357.678	55.1676	41.5425	159.967	94.3019	1540.56	10457.5	7.5844	2.56786	11.6174	1	0.5	1177.43	6.55	461.492	709.388	108.304	2.95358	1.69633	831.604
78	0.0550425	1.11131	0.0661126	1.54359	5.55322	0.123223	40.8022	16.4025	215.509	83.9576	370.319	81.0892	737.767	118.888	96.6316	77.6366	262.37	2386.04	12009.6	0.604986	0.434105	8.02951	1	0.5	1673.19	2.77605	278.39	1392.02	501.439	1.39364	0.295905	792.266
79	0	0.0730835	0.00326921	0	0.261855	0.260682	1.85878	0.613718	5.62271	1.29647	3.9904	0.693276	5.46866	0.668633	7.2338	0.260333	21.2723	38.5386	8657.51	0.0547218	0.0233775	5.52651	1	0.5	20.8115	0.0763527	8.61775	12.1174	158.704	2.34079	0.0122381	755.234
80	0.0217003	4.71128	0.198767	3.2974	6.70602	0.321572	35.4679	11.6415	129.719	44.1943	182.778	36.2928	326.346	51.1405	135.231	136.684	358.199	1278.14	10651.3	0.821455	0.819749	8.55417	1	0.5	832.837	8.22915	183.856	640.752	77.8637	1.00208	0.381585	798.807
81	0.0235887	0.963759	0.0572995	1.75424	6.32571	0.125652	41.8558	16.8746	213.561	77.3142	323.256	67.923	589.401	90.8474	114.632	62.4174	312.856	2224.27	12168.8	0.835659	0.509074	7.6124	1	0.5	1430.28	2.79889	278.743	1148.74	410.428	1.64153	0.199508	786.816
82	0.0117507	8.51818	0.174856	3.49232	6.36057	0.534876	28.4721	8.24793	89.3195	29.8581	121.584	24.7612	226.683	36.1921	32.4601	66.9542	74.2305	819.38	9866.53	0.917567	0.390284	15.2237	1	0.5	584.211	12.1971	132.935	439.079	35.9986	2.35102	0.901977	862.286
83	0	1.19565	0.0521942	1.24966	3.42746	0.196714	12.3531	2.17639	11.8176	2.01782	4.91966	0.72824	5.49919	0.770989	155.57	51.8029	423.891	69.0906	13466	0.111127	0.0110453	8.49532	1	0.5	46.4046	2.4975	29.9712	13.9359	5.57994	10.0611	0.122208	798.09
84	0.123465	17.8445	0.824862	21.05	36.1142	3.93312	132.429	35.4745	351.555	111.389	414.168	79.3027	660.19	96.8457	60.9719	100.059	111.373	2735.18	6505.3	11.4248	2.87395	10.9202	1	0.5	1961.24	39.8429	559.506	1361.9	34.1817	3.97531	0.898418	824.811
85	1.40803	60.0866	0.993893	11.4876	18.4627	6.62383	60.4534	16.2011	158.888	49.9283	201.717	43.2079	420.016	67.6483	113.728	376.839	146.41	1446.72	9337.61	3.72431	0.83621	8.17545	1	0.5	1117.12	73.9762	260.629	782.518	10.578	4.45379	2.57387	794.119
86	0.0109079	23.6514	0.0811229	1.67666	3.41932	0.815647	11.8043	3.43217	34.4492	11.7012	47.3766	10.7695	105.301	18.215	52.9121	76.1354	89.6601	350.815	9661.39	0.738564	0.382855	8.26999	1	0.5	272.704	25.4201	53.9206	193.363	7.60671	1.92909	0.849156	795.306
87	0.00560849	30.5464	0.067395	1.02297	2.53089	0.541182	13.7931	4.69678	55.3751	21.0802	93.9456	21.7387	218.839	37.1225	20.7879	49.7823	28.9376	647.993	10322.2	1.72477	0.755027	5.32923	1	0.5	501.306	31.6424	76.9371	392.726	12.4114	2.28438	1.72033	751.767
88	0.00591591	21.9391	0.0406447	0.542281	1.60805	0.230544	9.19488	3.07747	37.7758	14.4161	65.6871	16.5483	170.061	29.9304	22.3618	24.9241	37.3493	451.038	11963.8	1.7706	0.937714	7.12037	1	0.5	371.058	22.5279	51.8867	296.643	13.1678	1.88821	0.667325	780.066
89	0	7.49248	0.0301277	1.06881	2.57868	0.445557	13.4119	4.48947	56.1636	21.2125	92.874	20.9015	200.622	34.8642	50.0206	42.8212	85.5713	603.643	9457.83	0.988421	0.510425	9.67343	1	0.5	456.155	8.59142	77.0892	370.475	43.1215	1.93647	0.500415	811.745
90	0	4.0077	0.00987044	0.136078	0.241798	0.20369	1.93662	0.766871	9.79448	4.28982	20.0162	5.04109	57.8505	11.6553	53.5369	55.0845	89.6591	128.547	9977.71	0.449014	0.546869	4.82481	1	0.5	115.95	4.15364	12.9435	98.8529	23.7991	0.821063	0.614377	742.403
91	0.105071	35.3273	0.918619	13.5916	14.2218	3.59883	37.3014	9.96485	91.538	27.9813	107.239	23.0058	215.767	34.3123	22.5764	59.5607	30.5325	802.334	8402.95	1.28297	0.45028	13.3814	1	0.5	614.873	49.9426	156.625	408.306	8.1755	2.84928	1.95073	847.438
92	0.0060083	16.1778	0.0686767	1.34054	2.72903	0.812093	9.73778	3.30796	33.6465	11.493	47.4429	10.449	94.1686	15.5963	20.5993	18.9266	34.9863	325.688	9234.02	1.41576	0.514198	15.7882	1	0.5	246.976	17.5931	50.2334	179.15	10.183	2.75334	0.540972	866.549
93	0.0114519	8.30428	0.0721018	1.31494	2.84783	0.392568	13.4558	4.48026	54.9168	19.6234	88.1697	19.8393	192.758	32.1697	38.5879	34.3478	65.5744	582.449	9494.12	1.37792	0.726014	11.0293	1	0.5	438.356	9.70277	76.0932	352.56	36.336	1.89793	0.523799	825.897
94	0	26.2609	0.0331999	1.05537	2.70477	0.420977	13.2823	4.64974	58.1197	21.7234	100.672	23.7178	240.795	39.5829	35.5633	60.6394	53.7425	653.244	11190.2	2.77634	0.934101	8.26923	1	0.5	533.018	27.3495	79.1775	426.491	15.5941	2.9722	1.12833	795.296
95	0	9.19796	0.0172773	0.449536	1.08474	0.15695	5.57037	1.8446	22.6255	8.39548	38.4422	9.18483	92.0407	15.5497	16.0001	19.9817	24.841	255.601	10877	1.37646	0.534657	8.66545	1	0.5	204.56	9.66477	31.2821	163.613	16.9288	2.57448	0.804383	800.152
96	0.0106892	106.733	0.115399	3.18693	6.9868	2.36778	30.7793	10.2284	113.531	39.8175	175.217	41.4296	425.052	66.4743	20.489	732.29	848.882	1234.79	9144.16	18.1424	4.06029	5.16795	1	0.5	1021.93	110.046	163.893	747.99	6.79706	4.46824	0.862653	748.855
97	0.0108453	96.8312	0.338064	5.04782	8.56167	2.31308	34.7974	10.2506	112.843	39.1383	161.773	35.2173	333.295	53.6912	4.52264	348.292	138.324	1109.44	7972.36	2.53009	1.03859	14.471	1	0.5	894.108	102.228	168.766	623.114	6.09534	2.43608	2.51795	856.402
98	0.239179	93.4272	0.22434	3.33586	7.69487	1.85546	29.3535	9.49052	107.852	37.5366	167.852	38.6496	392.774	63.0413	7.91343	540.751	260.002	1120.56	9501.36	6.17242	2.40836	12.2329	1	0.5	953.326	97.2265	156.246	699.853	7.19817	2.56291	2.0798	837.334
99	0.179162	81.6806	0.181248	2.13661	4.05543	2.3258	22.0759	6.93254	73.6257	25.9148	115.652	28.4089	307.837	51.738	13.3195	441.601	567.022	866.747	9370.3	6.5259	1.45205	3.79102	1	0.5	722.744	84.1776	109.015	529.552	6.29088	4.49426	0.778807	720.389
100	2.99448	97.5357	0.902874	6.98143	8.35563	3.0021	33.1124	9.00729	93.5285	29.4978	118.811	25.4028	243.635	37.0571	8.73336	407.506	317.837	891.692	7359.51	4.63394	0.996915	4.52695	1	0.5	709.825	108.414	147.006	454.404	4.19136	4.64828	1.28212	736.491
101	0	155.295	0.21291	4.70436	10.2127	3.59855	49.0878	15.2983	168.97	61.0481	273.343	63.9916	654.259	108.344	12.785	649.049	461.23	1922.15	8572.2	11.6812	2.26252	6.51552	1	0.5	1568.37	160.212	247.167	1160.99	7.24654	5.16291	1.40721	771.232
102	0.0402286	28.0437	0.0905493	1.76949	2.6296	1.67904	13.9891	4.46112	51.3051	19.1287	89.496	21.6524	246.671	44.6491	4.17355	95.7577	178.236	622.384	10350.1	1.63529	0.305174	3.94092	1	0.5	525.605	29.944	74.064	421.597	14.0795	5.35856	0.537254	723.865
103	0.0381129	80.1277	0.197795	3.39491	5.42692	2.27903	18.9226	5.45268	55.2301	18.8469	77.0451	18.2118	180.028	28.9847	7.8641	336.41	290.376	588.174	8490.57	3.91628	1.14689	6.58804	1	0.5	494.186	83.7585	87.3113	323.116	3.85771	3.41469	1.15853	772.325
104	0.197318	10.2319	0.0720321	1.30725	3.23876	0.522588	14.8867	4.6065	52.8729	19.471	86.3945	20.2279	206.486	32.8671	2.86379	84.8058	116.442	558.715	8737.97	1.03371	0.594708	11.2567	1	0.5	453.382	11.8085	76.1275	365.446	30.9477	1.73818	0.728311	828.131
105	1.6213	169.594	1.55156	23.2301	35.9583	13.8371	129.663	34.3268	339.087	107.976	414.988	87.1313	807.479	124.351	12.1141	894.702	347.525	2978.35	7852.62	5.58697	1.20252	12.3215	1	0.5	2290.8	195.997	552.872	1541.93	7.86711	4.64606	2.5745	838.14
106	9.51019	30.6858	2.71507	17.0463	12.494	2.08506	59.2599	16.9272	184.691	65.6838	268.033	57.6604	531.399	83.3144	6.65556	203.075	268.044	1799.79	7934.27	2.68813	0.886693	8.57751	1	0.5	1341.51	59.9574	275.458	1006.09	16.7801	3.03164	0.757619	799.09
107	0.0611392	20.242	0.0471428	0.806909	1.75571	0.880491	10.4844	3.71742	49.3788	20.4644	105.28	27.9882	314.042	59.5185	2.97503	95.5088	117.624	650.126	9077.02	1.82929	0.713864	6.95817	1	0.5	614.667	21.1572	66.2168	527.293	24.9227	2.56251	0.811981	777.759
108	0.070949	32.8341	0.0808537	1.83626	3.34617	1.7243	16.1642	4.80685	48.6491	16.3467	70.1787	15.7233	164.857	28.8622	3.2389	104.702	127.663	521.417	9592.34	2.09366	0.485188	3.33098	1	0.5	405.481	34.8222	74.6907	295.968	8.4994	4.31515	0.82014	708.968
109	0.0161902	32.9019	0.0758434	0.840342	2.00229	0.974064	11.9139	4.1842	51.6729	19.7243	94.7205	23.6829	254.546	45.0623	5.22454	165.353	203.807	639.502	9944.66	4.3206	1.14209	4.81509	1	0.5	542.318	33.8343	70.7473	437.736	12.9377	3.78307	0.811325	742.215
110	0.267052	10.2779	0.261481	3.71991	5.38434	1.96363	20.8854	5.74392	64.453	23.3242	104.044	24.608	250.048	42.5836	9.24038	192.884	390.691	702.664	10116.8	2.18094	0.533711	4.1113	1	0.5	557.564	14.5263	98.4303	444.607	30.6071	4.08636	0.4937	727.686
111	0.00510529	23.1369	0.0437801	0.864955	2.02103	1.10793	13.562	4.50403	53.2819	20.1385	98.4763	24.1216	263.296	47.1841	6.23254	158.479	264.493	670.181	10837.1	3.40454	1.01687	3.70341	1	0.5	551.744	24.0507	74.4768	453.216	18.8442	3.34805	0.59918	718.305
112	0.010529	48.5358	0.0811909	1.77775	2.90863	1.04374	14.2667	4.8059	56.13	20.452	88.6708	21.4702	229.385	36.8733	10.4508	453.699	377.905	599.276	9797.8	4.81224	2.37872	8.2029	1	0.5	526.411	50.4053	79.155	396.851	7.8732	2.02304	1.20056	794.465
113	1.11683	27.7158	0.326483	2.26516	2.75646	1.13196	11.6322	3.51234	39.9649	15.44	68.511	16.9796	176.847	29.8727	1.87205	79.3767	67.3898	459.256	9257.9	1.06965	0.57752	5.77349	1	0.5	398.072	31.4243	58.9978	307.65	9.79021	1.85215	1.17787	759.434
114	0.0590545	61.6702	0.0923112	1.96363	5.0875	1.1326	27.8378	9.48415	118.895	47.0909	220.646	51.6225	524.77	86.0172	5.13556	210.38	185.84	1370.73	9685.34	3.99387	1.36307	5.70996	1	0.5	1156.37	63.7851	162.437	930.147	14.5825	2.93006	1.13205	758.368
115	0.0157379	79.2488	0.104705	2.81066	4.72162	1.92816	17.6945	5.23833	57.1825	18.4602	78.0753	17.9991	182.817	29.6145	6.82649	275.387	252.314	599.149	9275.55	3.74618	0.989569	4.15346	1	0.5	495.911	82.1799	86.7651	326.966	3.97866	3.78566	1.09144	728.611
116	0.618154	9.18882	0.21986	2.43407	3.76033	0.898954	24.8313	9.61921	130.201	54.8699	267.473	63.3909	659.517	109.976	10.7534	245.81	445.358	1648.47	7119.46	2.31308	0.748618	7.38895	1	0.5	1337	12.4609	169.311	1155.23	92.7081	3.08981	0.551937	783.796
117	0.0431435	27.6861	0.101571	2.7079	4.92354	2.87453	24.7201	6.57796	64.8615	20.4654	83.9434	18.9685	205.101	36.8934	4.90522	123.106	204.184	695.374	9863.41	1.81655	0.322476	3.66824	1	0.5	499.868	30.5387	103.958	365.372	11.9642	5.63313	0.602916	717.457
118	0.414606	23.2372	0.197973	2.08074	3.46858	1.78804	17.6024	5.35384	61.3139	22.4705	100.62	23.4716	242.963	40.7938	3.27214	122.249	123.425	680.707	8547.27	1.77528	0.527944	8.34408	1	0.5	545.776	25.9305	89.5268	430.319	16.5951	3.36262	0.990468	796.228
119	0.00543716	28.9629	0.0715114	1.53419	2.04838	1.31076	12.5369	3.82573	40.8791	14.9273	65.6981	15.3127	156.981	26.7654	3.96429	148.888	146.51	458.659	10110.8	2.41107	0.617335	4.56006	1	0.5	370.859	30.574	60.6009	279.684	9.14777	3.90561	1.01623	737.164
120	4.12685	40.6135	0.935814	5.52245	4.01032	0.990613	16.1967	4.6806	56.5059	20.9102	91.8625	21.96	225.896	38.1056	2.62485	94.2032	94.7572	631.084	9227.71	2.44342	0.782019	7.06303	1	0.5	532.317	51.1986	82.3842	398.734	7.78799	3.1245	0.994153	779.256
121	0.179388	14.9201	0.141845	1.6128	2.82334	0.296447	14.8574	4.73604	60.4496	23.1556	105.877	23.8336	237.718	39.043	7.77489	206.293	285.838	670.582	10074.3	2.65449	1.13738	3.64221	1	0.5	529.644	16.8541	83.1628	429.627	25.4909	2.33387	0.721714	716.825
122	0.027491	38.058	0.345296	5.62557	9.54403	2.83713	36.3867	10.8721	118.184	40.1774	163.284	35.1469	339.056	53.3865	1.78103	82.0938	57.3468	1081.05	7508.64	1.14071	0.471016	14.3912	1	0.5	852.931	44.0564	177.824	631.05	14.3237	2.42181	1.43153	855.764
123	0.341928	46.1582	0.174408	2.20587	4.75088	1.15609	21.2689	7.48749	87.5457	32.1026	150.531	34.4111	348.197	56.3696	3.20374	134.314	108.943	978.595	10619.9	3.17593	1.1051	7.51133	1	0.5	792.701	48.8804	122.209	621.611	12.717	2.87388	1.23288	785.459
124	0.0270657	58.9153	0.316838	5.5113	10.8195	4.62662	41.7508	11.3095	118.39	40.7272	166.115	37.1206	371.321	61.9094	5.73177	279.48	159.552	1173.27	7826.68	2.95869	0.566509	9.974	1	0.5	928.86	64.7705	186.897	677.193	10.4553	5.22267	1.75166	815.014
125	3.10184	55.8877	0.969856	8.0938	8.07137	2.30379	35.8568	11.4039	126.803	44.2017	185.839	40.7811	394.1	60.9238	6.07042	226.17	174.321	1267.01	8539.13	2.47752	1.37171	17.9741	1	0.5	978.338	68.0532	184.439	725.846	10.6659	1.80615	1.29743	881.995
126	0.133695	93.2334	0.94031	15	24.7246	7.62195	109.73	34.2746	367.909	129.006	533.04	115.699	1100.87	169.699	16.1635	645.487	419.014	3541.27	9073.07	3.49497	1.13443	12.2193	1	0.5	2701.88	109.307	544.26	2048.31	18.739	3.08082	1.54049	837.21
127	0.0203168	15.104	0.125212	2.65853	6.55616	1.57003	35.657	12.795	163.205	63.5763	296.247	69.6853	708.464	115.501	12.3857	264.437	364.271	1890.66	7704.67	2.66968	0.992385	6.53033	1	0.5	1491.17	17.9081	219.783	1253.47	69.9949	2.69016	0.725936	771.456
128	61.4346	169.818	15.6202	72.9926	16.7698	2.78828	31.6681	8.68292	100.545	35.9904	163.41	38.344	408.821	70.3124	20.6748	402.604	610.909	1114.5	10419	3.74928	1.45964	7.41263	1	0.5	1197.2	319.865	160.454	716.878	2.24119	2.56864	0.659025	784.119
129	0.1203	43.6487	0.178377	2.7944	4.30798	1.10703	18.6207	5.17335	57.4846	20.8371	91.4213	22.3969	227.858	38.3974	16.701	317.71	355.39	627.079	9711.72	2.30712	1.35288	8.53203	1	0.5	534.346	46.7418	86.6937	400.911	8.57715	1.70533	0.893977	798.538
130	0.00869878	41.4977	0.183772	3.075	6.5908	2.11439	28.3826	8.8814	105.858	36.6358	160.86	35.8647	365.796	56.957	7.78207	143.136	161.559	1064.14	8622.47	2.88735	0.964194	8.22029	1	0.5	852.706	44.7652	151.827	656.114	14.6568	2.99457	0.885969	794.684
131	0.22062	49.6014	0.377468	3.53769	3.44332	1.38412	15.6742	4.68033	53.2218	18.5423	85.2983	21.4186	235.862	45.4046	31.7705	671.557	657.723	607.622	10726.4	2.66496	0.745775	17.845	1	0.5	538.666	53.7372	78.4038	406.525	7.56507	3.57341	1.02103	881.125
132	0.0133703	40.8141	0.162008	2.21519	4.16022	1.04412	17.8477	5.46177	62.3033	21.6501	93.6363	21.3045	203.286	33.9475	3.7657	84.403	73.3722	627.846	8728.65	1.27962	0.496253	10.4844	1	0.5	507.846	43.2047	90.8172	373.824	8.6524	2.57855	1.15034	820.387
133	0.0218127	2.67507	0.248493	4.50257	6.5697	0.751057	27.8594	9.41925	112.389	44.0561	198.113	46.0759	457.878	76.0766	14.7794	159.62	324.329	1285.4	8948.17	1.07998	0.661801	8.3367	1	0.5	986.635	7.44794	156.988	822.199	110.393	1.63188	0.492153	796.136
134	10.4508	43.5761	2.66534	12.8237	5.28207	0.742238	18.7608	5.2363	58.1339	20.3059	88.6571	21.2795	216.856	34.5967	11.5444	189.701	230.889	596.767	9299.22	1.15204	0.831014	13.8002	1	0.5	539.366	69.5159	88.1553	381.695	5.49076	1.38631	0.821611	850.949
135	0.0894995	17.991	0.427283	7.13502	9.96898	3.49963	61.695	21.9546	254.886	95.9544	409.35	88.6307	845.495	131.001	12.8799	311.687	218.703	2637.75	8303.51	1.69057	0.679373	7.68534	1	0.5	1948.08	25.6428	352.004	1570.43	61.2426	2.48843	1.42516	787.786
136	22.9946	81.3858	5.52174	24.7816	8.31146	0.90965	23.4177	7.30389	85.5276	32.9941	150.793	36.0848	370.229	61.608	8.59296	175.671	149.929	967.785	9077.61	3.88891	1.09526	5.20232	1	0.5	911.864	134.684	125.47	651.71	4.83881	3.55068	1.17169	749.481
137	0.0416024	16.5127	0.240243	4.52762	6.85497	2.22142	31.3194	10.1246	112.329	40.1888	173.079	38.9301	378.289	60.3125	4.64571	100.958	80.2933	1161	8014.14	2.23449	0.68825	9.79504	1	0.5	874.972	21.3222	162.85	690.8	32.3982	3.24663	1.25737	813.077
138	11.4244	32.4451	3.40307	18.363	6.59074	0.571268	27.2543	8.64071	102.657	39.545	175.119	38.8389	381.797	60.8156	9.58995	108.671	188.152	1103.49	8543.73	2.27105	0.806375	3.50827	1	0.5	907.465	65.6356	145.714	696.115	10.6058	2.81637	0.57757	713.514
139	0.0683028	28.1125	0.0720526	1.07697	3.31022	0.906964	15.7968	5.70029	68.4909	25.5589	120.039	28.5023	304.026	51.7217	11.1005	173.236	189.131	769.658	10893.5	1.78592	0.785562	4.44054	1	0.5	653.383	29.3298	94.2051	529.848	18.0652	2.27343	0.915961	734.717
140	0.0104638	26.3749	0.197929	4.12673	5.64066	2.37123	24.6764	6.77174	79.3643	27.7817	122.937	27.7241	276.213	45.3654	3.77633	96.8614	60.3681	802.479	8764.28	1.03377	0.430937	5.33938	1	0.5	649.556	30.71	118.824	500.021	16.282	2.39889	1.60451	751.948
141	0.209457	18.8455	0.153439	2.15961	3.70658	0.984358	17.3601	5.63892	71.816	26.8338	120.723	28.726	299.742	50.1483	3.97266	74.7808	64.7408	789.688	7623.76	1.31045	0.449777	10.2911	1	0.5	647.047	21.368	99.5059	526.173	24.6244	2.91356	1.15508	818.377
142	0.00525622	0.9499	0.0389748	0.848487	3.48772	0.0532991	28.3708	12.7837	181.225	75.5476	349.209	80.2434	787.696	119.304	19.6006	82.0166	362.78	2171.18	11862	1.48622	1.12779	6.89981	1	0.5	1639.76	1.84262	225.92	1412	766.301	1.31781	0.226078	776.918
143	0	19.6627	0.0984392	1.99334	3.73084	1.03032	19.962	7.50065	97.2625	38.3579	180.819	43.2966	439.569	74.5009	27.3068	372.694	392.538	1162	9213.85	3.90597	1.94398	4.88603	1	0.5	927.785	21.7545	129.486	776.544	35.6958	2.00926	0.949448	743.581
144	0	10.2994	0.0463977	0.794268	1.71168	0.53496	7.49098	2.46281	31.0458	13.0988	67.0507	19.0871	227.679	45.4158	12.6457	91.7788	187.303	414.148	11496.6	1.50462	0.924551	3.49486	1	0.5	426.718	11.14	43.2462	372.332	33.4229	1.62741	0.490003	713.177
145	0	13.1414	0.024722	0.571143	2.39164	0.0450285	14.8725	6.41113	87.0068	35.7118	167.206	38.921	374.764	57.9518	28.4646	113.987	177.987	1038.35	12816.4	12.913	6.50305	4.68828	1	0.5	799.019	13.7373	110.727	674.555	49.1039	1.98569	0.640419	739.731
146	0.0161833	7.03959	0.083211	1.46278	3.08442	0.240951	12.7569	4.27095	48.4703	16.7842	69.4948	14.7232	137.164	21.0238	26.0814	45.4416	87.3715	480.769	9892.71	2.41773	1.18605	4.45425	1	0.5	336.615	8.60176	68.8235	259.19	30.1322	2.03847	0.520096	735
147	0.0108391	9.80933	0.0278285	0.521458	1.68935	0.0454716	8.44482	3.84211	52.7669	20.8227	99.3108	26.1018	279.171	47.7967	220.018	119.881	748.464	621.427	12512.4	3.756	8.51774	7.5761	1	0.5	550.361	10.3695	66.7886	473.203	45.6343	0.440962	0.16017	786.33
148	0.0210017	13.1908	0.16258	3.60547	8.97717	1.88798	50.4785	16.7346	198.893	72.2639	310.52	68.2535	650.701	105.394	45.5367	123.115	124.089	2058.27	10729.5	1.71539	0.878254	12.8332	1	0.5	1501.08	16.9799	276.971	1207.13	71.092	1.95319	0.99215	842.705
149	0.0159572	16.128	0.0573213	1.02221	2.92305	0.380806	14.5707	5.1943	66.1987	25.4087	112.606	25.2983	253.476	39.8836	91.2324	143.109	245.577	725.029	10669.3	1.85836	1.24603	6.7165	1	0.5	563.163	17.2235	89.2676	456.672	26.5145	1.49142	0.582747	774.238
150	15.0595	37.1255	4.6006	26.5017	11.7542	0.697491	35.3754	9.58909	103.08	34.6066	136.368	27.8685	254.41	39.0941	12.3206	26.5521	31.1519	928.689	9232.03	2.66203	0.980467	16.1486	1	0.5	736.13	83.2873	160.496	492.347	5.91143	2.71506	0.852342	869.208
151	0.0107741	9.24157	0.196401	3.00913	4.68494	0.436576	15.0522	3.95156	39.3096	12.3043	48.879	10.5024	95.2661	14.7059	93.312	202.368	232.498	359.576	9207.08	1.61045	0.533683	12.6667	1	0.5	257.55	12.4579	63.4348	181.658	14.5818	3.01762	0.870408	841.235
152	2.84591	77.2332	3.61817	29.2881	20.2997	8.44898	58.7879	17.4586	172.428	49.7044	186.315	39.9453	382.813	54.3865	195.584	65.518	583.654	1491.62	11925.5	1.90896	0.837278	17.5583	1	0.5	1103.57	112.985	277.424	713.164	6.312	2.27996	0.112255	879.176
153	0.168828	3.02304	0.190442	2.08011	4.71494	0.268766	27.3908	7.1604	53.2734	11.9318	34.7122	6.38108	51.9493	7.08986	216.921	54.4081	593.79	361.914	12875	1.18209	0.882399	14.0842	1	0.5	210.335	5.46242	92.8083	112.064	20.5155	1.33963	0.0916284	853.283
154	0.0271169	3.75538	0.043311	0.93449	3.44158	0.116317	21.9293	8.10325	100.849	38.9818	176.907	41.7109	417.619	65.6211	178.338	112.726	469.567	1105.76	11094	1.94026	1.29969	12.9693	1	0.5	880.039	4.7603	134.439	740.84	155.629	1.49286	0.240064	843.894
155	0.00513621	8.74151	0.0527196	1.57205	3.0134	0.108878	16.5897	5.38251	65.9359	24.9631	106.541	23.778	227.187	34.1601	156.795	133.012	407.028	692.927	10130.7	6.30255	3.45925	10.6695	1	0.5	518.031	10.3714	91.0304	416.629	40.1709	1.82194	0.326787	822.283
156	0.00525777	0.81726	0.0632678	0.72345	3.88786	0.0441431	25.6208	10.3812	133.981	47.8099	193.009	39.1391	353.812	50.8229	70.6443	41.5708	184.085	1374.46	11640.1	0.745535	0.461613	11.0962	1	0.5	860.118	1.60923	173.915	684.593	425.415	1.61506	0.225824	826.558
157	0	11.4175	0.0857539	1.41222	2.5566	0.30268	12.0728	4.25752	50.8447	18.4397	79.531	17.5072	171.747	27.0527	77.1339	124.055	182.113	520.935	10100.7	2.61706	0.967551	13.6978	1	0.5	397.227	12.9155	70.0343	314.277	24.3333	2.70483	0.681197	850.099
158	0.0113454	13.3338	0.0769244	1.41774	3.042	1.00713	20.2234	6.58939	85.4997	32.4223	146.484	34.1177	344.216	60.0613	86.8203	125.883	199.41	939.927	9366.16	1.6947	0.70913	13.8031	1	0.5	748.502	14.8398	116.362	617.301	41.5975	2.38983	0.631279	850.973
159	0.0847407	6.58758	0.200502	3.51768	7.08445	0.701196	41.3837	13.6355	161.655	58.6313	255.41	55.5008	528.532	82.3382	176.959	187.966	359.194	1665.56	10153.3	2.27696	3.32552	8.46352	1	0.5	1215.26	10.3905	224.46	980.412	94.3566	0.684693	0.523301	797.7
160	0.00557934	7.44189	0.17506	3.58894	6.9553	2.40858	41.1803	12.9914	154.885	54.6349	221.642	46.8404	426.569	62.5528	34.3471	46.9654	71.0855	1441.05	7385.47	7.68086	3.25051	11.4426	1	0.5	1041.87	11.2115	218.42	812.239	72.4472	2.36297	0.660689	829.932
161	0.02	276.565	29.1266	130.294	29.65	3.57027	59.8151	15.3381	167.097	58.8103	244.282	50.4455	460.237	69.8971	131.414	173.577	259.422	1645.06	8454.16	3.58917	1.37086	4.41192	1	0.5	1595.15	436.006	275.471	883.672	2.02674	2.61818	0.669092	734.123
162	1.33105	44.2275	0.221787	1.82227	2.1665	0.620189	10.0274	3.76729	50.3439	21.7306	121.27	36.1394	448	87.5563	135.57	207.644	249.713	775.575	10867.3	3.96935	1.45763	6.15207	1	0.5	829.225	47.6026	66.9253	714.697	15.0138	2.72315	0.831532	765.598
163	0	14.0847	0.0284647	0.435297	1.00065	0.194695	4.72412	1.49665	19.6879	7.09349	33.5835	8.10288	86.4006	15.4447	22.7961	17.581	41.7385	216.521	9725.82	1.09817	0.147568	7.72162	1	0.5	192.278	14.5485	27.1041	150.625	10.3533	7.44183	0.421219	788.266
164	0.0215816	16.7118	0.0521434	0.563337	1.46492	0.60524	8.30068	3.22682	45.4919	20.2218	108.156	29.7788	351.23	65.8807	336.007	154.196	596.751	632.621	10723.7	2.6943	2.3041	10.9877	1	0.5	651.706	17.3489	59.0895	575.268	33.1588	1.16935	0.258392	825.483
165	0.00520132	8.04316	0.040903	0.792575	1.83007	0.217974	9.28029	3.409	38.2298	14.2928	64.5596	15.9663	171.26	30.1582	130.998	82.5946	225.489	442.38	11507.4	1.3076	1.00218	9.28241	1	0.5	358.086	8.88184	52.9671	296.237	33.3532	1.30475	0.366291	807.369
166	0.141109	21.858	0.298555	4.19779	7.16608	1.36987	25.8172	7.06852	70.1016	24.5616	106.341	23.6916	240.928	38.6425	56.6775	102.595	84.869	723.367	8738.33	0.867511	0.426165	8.8286	1	0.5	572.183	26.4955	111.523	434.164	16.3864	2.03562	1.20887	802.1
167	0	10.2024	0.0242536	0.606628	1.08033	0.303694	4.25319	1.16378	13.1186	4.60486	21.7839	5.02265	53.5905	8.78696	15.8014	13.613	26.4795	146.066	8670.9	0.474532	0.234437	13.6218	1	0.5	124.542	10.8333	19.9196	93.7888	8.65749	2.02414	0.514095	849.464
168	11.2688	30.8852	2.44345	11.6661	5.12874	0.19052	17.7284	4.89814	51.3375	18.5976	78.0238	17.7255	180.673	29.5137	88.3458	75.2882	148.963	514.445	8023.21	1.7754	0.708284	5.06341	1	0.5	460.081	56.2636	79.2833	324.534	5.7681	2.50663	0.505415	746.927
169	0.00529323	11.7799	0.220456	3.86244	6.07178	1.11762	26.7398	7.69711	81.8145	26.8701	108.867	22.3538	208.687	31.4185	24.9231	32.3728	39.7132	747.004	9288.11	1.80928	0.754851	8.02239	1	0.5	537.506	15.8681	123.441	398.197	25.0941	2.39686	0.815165	792.175
170	0	12.2053	0.0239567	0.368196	0.679227	0.424497	4.44017	1.35422	15.8849	5.70404	26.3955	6.06892	65.6797	10.8065	21.2532	18.9048	34.9993	175.765	10684.9	1.13731	0.610054	3.34223	1	0.5	150.035	12.5975	22.783	114.655	9.10141	1.86427	0.540147	709.262
171	0	36.2195	0.0689351	1.67573	2.95152	0.593233	13.9914	4.63975	54.7278	19.5888	86.6197	18.7944	179.62	29.1084	21.9509	56.0706	22.506	562.406	9724.76	1.69039	0.512354	15.1322	1	0.5	448.6	37.9642	76.9037	333.732	8.79069	3.29927	2.49136	861.584
172	0.0231196	40.2963	0.335166	4.68779	9.05503	3.03332	37.2605	10.6517	117.495	41.5427	178.332	41.9992	424.759	75.4417	4.96754	213.288	152.642	1244.04	9958.32	1.75746	0.635808	6.35994	1	0.5	984.912	45.3424	177.496	762.074	16.8071	2.76413	1.39731	768.852
173	0.0181709	19.9545	0.179153	3.35604	5.26909	2.38768	24.8805	7.73487	88.5518	32.6089	151.682	35.9542	387.986	70.6147	4.98054	184.148	155.078	994.364	8894.85	2.17165	1.12526	5.26949	1	0.5	831.177	23.5079	128.824	678.846	28.8773	1.92991	1.18745	750.697
174	0.00551809	2.43321	0.0545256	1.43039	4.36756	0.176024	25.1883	8.84094	110.152	40.5522	184.563	40.8035	378.188	66.0354	6.5613	101.337	249.004	1137.92	11555.8	1.76097	1.0124	9.39186	1	0.5	862.792	3.92364	148.725	710.143	180.991	1.73941	0.406971	808.609
175	0.00474583	35.2556	0.0298701	1.09678	2.54263	1.34943	18.2779	6.3615	84.4144	35.9975	183.637	48.3679	555.902	111.979	13.5203	240.678	456.81	1216.27	10988.1	5.70635	1.24568	3.04994	1	0.5	1085.22	36.387	112.946	935.884	25.7203	4.58093	0.526867	701.335
176	0.00542583	31.3568	0.0408522	0.743649	2.51029	0.564057	14.4349	5.99489	76.0082	30.9205	145.74	35.605	364.299	62.7911	12.3099	194.453	404.401	905.739	11331.7	3.72318	2.11559	3.28214	1	0.5	771.015	32.1467	99.5123	639.356	19.8887	1.75988	0.480842	707.68
177	0.00560161	14.5181	0.0325136	0.617436	1.63678	0.682745	6.81879	2.51119	31.1582	12.3421	58.2526	15.9041	184.393	36.3984	11.2156	160.573	280.568	381.684	12683.3	0.382295	0.419569	4.85498	1	0.5	365.272	15.1737	42.8077	307.29	20.2515	0.911162	0.572313	742.985
178	0.0108702	10.4492	0.02842	0.994567	1.83695	0.866697	8.55084	3.32999	44.4242	19.4882	103.313	28.5351	337.898	71.002	13.7462	158.704	347.939	614.935	10621.2	0.758869	0.822559	5.18998	1	0.5	630.727	11.483	59.0087	560.235	48.7881	0.922571	0.456124	749.257
179	1.87525	79.6664	4.96534	36.6764	28.54	10.1521	60.0905	18.2772	182.544	56.9746	238.965	56.4443	600.715	109.667	28.1246	667.784	564.655	1780.62	10987	4.48815	1.52815	15.7513	1	0.5	1485.55	123.183	299.604	1062.77	8.62751	2.93699	1.18264	866.275
180	0.005696	27.3705	0.0594751	1.35183	1.95626	0.635318	10.9163	3.59901	39.5251	14.2043	60.7049	13.8437	135.55	23.0508	2.3245	67.6334	42.964	413.885	9517.76	0.924895	0.464923	10.6458	1	0.5	332.773	28.7875	56.6319	247.353	8.59239	1.98935	1.57419	822.042
181	0.997783	154.922	3.30411	24.983	25.2834	8.08062	75.3442	23.7146	246.718	81.1917	324.736	68.2998	621.748	99.9876	32.1331	1115.03	498.697	2253.87	9289.96	12.8802	4.10392	10.7692	1	0.5	1759.31	184.207	379.141	1195.96	6.49249	3.13851	2.23589	823.295
182	0	48.3017	0.0863352	2.27108	4.64842	1.60269	26.991	8.92454	110.502	41.296	178.759	41.5435	385.8	62.8082	6.86183	141.531	137.866	1180.06	10140.7	4.44744	1.71247	3.62008	1	0.5	913.535	50.6591	152.669	710.207	14.0193	2.59709	1.02658	716.285
183	0.0258822	22.936	0.0752414	1.41436	3.27094	0.427444	20.8942	8.53173	109.086	40.625	183.347	42.3104	416.55	73.5162	30.3365	485.924	649.402	1186.99	11162.8	13.9148	6.34462	3.5198	1	0.5	923.01	24.4515	142.21	756.349	30.9327	2.19317	0.748264	713.803
184	0	16.2232	0.0617278	1.25443	2.97376	0.560891	12.6894	4.63936	53.4801	20.123	93.292	22.1765	231.888	41.4555	5.43428	86.157	115.817	608.64	9222.84	1.37879	0.759228	15.6534	1	0.5	500.818	17.5393	74.3435	408.935	23.3153	1.81604	0.743908	865.542
185	1.61599	17.7426	0.551625	3.46422	4.11244	0.583008	17.3818	6.34489	73.1197	27.7769	127.054	29.6952	299.283	51.7134	6.89845	96.6459	145.701	812.715	9296.79	1.92852	1.09993	13.1548	1	0.5	660.439	23.3745	101.542	535.523	22.9106	1.75331	0.663317	845.5
186	0.00552707	2.53496	0.0641964	1.84911	3.61188	0.248802	23.2925	9.71649	122.612	48.9061	226.398	51.9749	510.654	89.8017	11.2384	104.622	243.348	1370.2	10669.9	1.63618	0.741262	9.84105	1	0.5	1091.67	4.45379	159.482	927.734	208.302	2.20729	0.42993	813.578
187	6.60828	37.9351	1.81891	8.39113	3.46676	0.474105	12.9959	4.52322	61.3338	24.8593	116.621	28.5842	296.173	54.1849	14.9818	221.987	277.355	729.315	10993.6	1.83731	1.13622	19.3703	1	0.5	657.969	54.7535	82.7937	520.422	9.50482	1.61704	0.800372	891.098
188	0	17.3248	0.0272308	0.783538	1.6465	0.584637	8.94099	3.28907	44.1499	17.3942	81.9114	20.0218	206.479	37.975	1.9218	31.4661	34.5552	524.539	9168.53	1.10449	0.345425	10.6914	1	0.5	440.528	18.1356	58.6111	363.781	20.059	3.19747	0.910602	822.506
189	0.032174	28.2747	0.136736	1.56411	2.60237	1.07005	15.5369	5.72314	76.3001	31.3813	164.535	42.2638	468.023	91.3001	13.3415	247.725	230.509	1009.74	10704.2	4.04426	1.17563	5.36123	1	0.5	928.743	30.0078	101.232	797.502	26.5765	3.44007	1.07469	752.336
190	0.00568537	28.5242	0.0725742	2.28934	4.50104	1.90798	25.2492	7.84494	90.2219	32.2692	137.494	30.5783	285.157	47.9576	3.5038	103.218	45.4375	913.729	8944.98	0.717034	0.333644	4.01958	1	0.5	694.073	30.8918	129.725	533.456	17.2685	2.1491	2.27165	725.645
191	0.033352	36.5034	0.070985	1.2447	3.05311	0.859938	16.7016	5.95052	75.3026	30.4274	147.754	36.9099	389.938	71.3624	16.8138	214.373	277.334	919.322	10447.4	4.88606	2.90759	4.11366	1	0.5	816.112	37.8525	101.868	676.392	17.8692	1.68045	0.772978	727.738
192	0.0230023	17.7788	0.19025	3.54618	5.65062	1.41162	28.007	8.5673	93.8756	33.608	146.414	32.1824	313.234	53.0077	7.59668	123.974	115.258	993.056	9850.86	0.647974	0.442256	11.4572	1	0.5	737.497	21.5382	137.512	578.447	26.8568	1.46515	1.07563	830.072
193	0	15.5273	0.0917273	1.4626	2.39929	1.38554	14.2019	4.90415	57.8245	21.7853	100.575	24.4893	260.745	47.5131	3.89434	68.7666	55.9492	651.613	7749.18	0.828806	0.379001	12.6457	1	0.5	552.905	17.0817	80.7154	455.108	26.6431	2.18682	1.22909	841.049
194	3.38862	31.0524	1.38481	8.43959	5.22402	1.77196	14.7421	4.93241	53.2974	18.3651	81.6228	19.8109	206.105	39.3685	64.3478	571.617	849.002	562.014	11779.2	1.32058	1.01351	4.25147	1	0.5	489.505	44.2654	79.9679	365.272	8.25186	1.30298	0.673282	730.734
195	0.257446	11.4433	0.159184	2.04439	2.55064	0.642378	11.3428	3.42656	41.9288	14.6041	67.2104	15.8295	163.444	29.3321	37.2768	196.346	517.749	447.717	11138.4	1.03767	1.02014	3.91641	1	0.5	364.216	13.9043	59.8911	290.42	20.887	1.01718	0.37923	723.304
196	0.00571016	16.5866	0.0298248	0.688161	1.95855	0.497853	8.88274	2.64539	29.9244	11.0428	48.6614	11.2363	109.981	19.644	5.2396	59.1032	61.2914	325.944	10926.6	0.425828	0.31551	13.8933	1	0.5	261.785	17.3103	43.9089	200.565	11.5865	1.34965	0.964298	851.719
197	0.0167973	26.1053	0.379431	6.447	13.9603	1.89835	61.5486	17.8376	185.672	60.2429	233.344	46.4541	392.26	59.1693	8.81007	110.858	80.9463	1572.42	8831.37	2.97771	1.67269	9.86838	1	0.5	1105.33	32.9485	280.917	791.469	24.0214	1.78019	1.36953	813.874
198	0	14.9029	0.0424549	0.946848	2.09943	0.31156	11.776	4.17368	51.1144	18.8755	80.8957	18.1916	168.247	26.7332	5.67759	39.9515	60.3039	514.003	10220	4.20445	2.90173	3.96099	1	0.5	398.31	15.8922	69.475	312.943	19.6916	1.44895	0.662504	724.322
199	0.0473671	13.852	0.254172	3.05953	5.84279	0.667308	25.7697	8.71355	99.2599	37.299	159.518	36.6814	353.725	58.2666	14.5599	107.639	90.4661	1021.97	8358.81	1.26659	0.769336	4.45237	1	0.5	802.957	17.2131	140.253	645.491	37.5	1.64634	1.18983	734.961
200	0.00575825	2.23112	0.0801938	1.8929	3.32347	0.779392	13.4496	3.99695	47.5257	16.428	69.1095	14.7602	145.948	24.5577	4.34318	20.417	30.2262	461.569	8888.54	0.537421	0.38348	8.72685	1	0.5	344.088	4.20997	69.0751	270.803	64.3243	1.40143	0.675474	800.889
201	64.7394	161.008	24.7749	137.746	33.3906	1.95338	42.9636	8.45468	75.3832	22.8717	90.2356	18.8178	172.461	28.7212	11.1611	51.6188	73.8037	618.212	8647.81	2.43371	0.988466	4.02626	1	0.5	883.521	388.268	162.145	333.107	0.85793	2.46211	0.699406	725.795
202	0	4.07777	0.0392648	0.678565	2.47046	0.116342	17.1867	6.32909	81.933	31.1884	143.187	32.7802	321.003	53.833	26.9813	65.1397	146.869	879.651	12088.4	1.40873	0.895065	12.0394	1	0.5	694.823	4.7956	108.036	581.992	121.359	1.57389	0.443523	835.558
203	0.033851	5.30986	0.176938	2.10179	4.08131	0.555568	14.023	3.42206	34.1798	10.7898	40.7265	7.9	68.3646	10.4901	6.73391	22.2297	17.852	287.755	10771.7	0.7216	0.206057	20.2004	1	0.5	202.155	7.62244	56.2618	138.271	18.14	3.50195	1.24522	896.267
204	0.153132	8.12951	0.28255	4.68577	7.55608	0.950897	29.559	8.59883	94.8323	31.9943	128.014	26.5336	237.157	38.9926	31.7154	75.9313	88.0226	875.882	9639.09	1.8067	0.777256	3.32983	1	0.5	617.44	13.251	141.497	462.692	34.9176	2.32446	0.862634	708.938
205	0	8.58844	0.0352892	0.645233	1.21034	0.0799684	7.64679	2.70354	35.1486	13.6589	65.9215	15.9969	155.205	27.0361	28.0151	30.3096	81.4655	390.849	12052.1	3.67866	1.5992	5.30023	1	0.5	333.876	9.26896	46.7892	277.818	29.973	2.30032	0.372054	751.249
206	39.4698	152.015	25.7681	138.017	35.1754	2.32722	52.6132	11.0184	101.401	30.587	114.993	22.7435	201.38	30.8337	27.9535	48.225	73.383	856.529	9820.58	1.36651	0.711853	13.3282	1	0.5	958.342	355.27	202.535	400.537	1.12741	1.91965	0.657169	846.985
207	0.00587217	6.99469	0.0442997	0.784278	1.58006	0.126964	9.44216	2.83573	36.7455	13.2317	58.2153	12.6739	126.821	21.0572	7.48528	15.7311	19.9806	378.215	9808.35	1.85446	0.716778	14.2468	1	0.5	290.558	7.82914	50.7305	231.999	29.6327	2.58721	0.78732	854.603
208	0.00595366	6.09163	0.0483584	0.815155	1.50932	0.139835	8.85372	2.95326	35.7095	12.769	58.3499	13.0455	128.826	22.093	8.13409	13.0163	22.2129	371.71	10463.9	1.75271	0.768976	11.7047	1	0.5	291.21	6.96109	49.1656	235.083	33.771	2.27928	0.585979	832.431
209	0.00534287	43.206	0.0310613	0.868312	1.42955	0.44618	6.80747	2.44866	28.0568	11.6142	55.4056	14.5767	162.395	31.8076	27.8177	73.4671	71.7074	350.914	11318.3	2.19798	0.996403	11.9235	1	0.5	359.098	44.1107	39.1886	275.799	6.25243	2.20592	1.02454	834.483
210	0.0175004	11.8519	0.118452	2.17635	4.27822	0.175364	19.0993	6.29242	72.0106	26.4684	115.597	24.9103	236.255	37.8301	21.3406	44.6921	55.8522	729.771	10452.6	4.75773	1.79071	9.03055	1	0.5	557.08	14.1642	101.856	441.06	31.139	2.6569	0.800184	804.471
211	0.00545991	18.4571	0.123607	1.82469	3.67893	0.0870276	19.8887	7.84421	98.8185	38.8683	175.724	41.1925	398.777	65.7184	78.5294	111.425	223.646	1070.21	12392.4	17.7245	6.91856	4.11194	1	0.5	871.008	20.4109	130.317	720.28	35.289	2.56188	0.498221	727.7
212	0	27.6104	0.0735465	1.47806	3.72775	0.428925	19.4566	6.25689	72.3789	25.6719	113.886	25.4978	243.746	40.9996	172.642	295.798	447.27	780.739	11221.2	2.95766	2.6677	5.49672	1	0.5	581.212	29.162	102.249	449.801	15.4242	1.10869	0.661342	754.717
213	0.0108952	3.26541	0.135967	3.17302	6.49984	0.169098	18.2053	3.99717	32.8435	7.58414	21.9773	3.36847	24.7422	3.1511	53.2104	61.5231	142.077	231.927	11754.9	0.403407	0.20754	19.5027	1	0.5	129.123	6.5853	61.7149	60.8232	9.23621	1.94376	0.433028	891.934
214	0.0219859	0.829123	0.0382727	0.851363	3.38638	0.0978985	27.4348	11.9235	146.544	51.0074	201.969	41.5806	373.086	58.5966	116.506	49.7093	329.872	1457.55	12624.7	0.795474	0.637621	7.72758	1	0.5	917.367	1.74074	189.387	726.239	417.2	1.24757	0.150693	788.345
215	0.0272952	0.945817	0.0666407	1.37766	4.93368	0.0768302	38.1953	15.1838	192.862	74.2985	317.742	68.3973	608.759	100.341	82.9565	59.5944	226.235	2087.59	12357.7	0.55788	0.56657	11.145	1	0.5	1423.21	2.41742	251.252	1169.54	483.797	0.984662	0.263418	827.038
216	0.0590413	3.46301	0.0686092	1.79778	3.89866	0.090627	22.3218	7.5219	92.3755	34.56	150.145	33.0794	308.014	51.921	110.11	131.031	282.593	966.322	11901.2	1.30049	0.782301	11.5296	1	0.5	709.317	5.38844	126.208	577.72	107.215	1.66239	0.463675	830.766
217	0.0440751	1.78155	0.0992198	2.45326	6.3157	0.139527	41.7469	15.6744	198.033	73.7326	314.307	66.7387	605.82	97.7075	95.4431	84.8125	251	2056.02	11816.2	0.981633	0.68218	11.6432	1	0.5	1424.59	4.3781	261.91	1158.31	264.568	1.43897	0.337898	831.848
218	0.0232353	3.04404	0.0235969	0.258618	0.362434	0.196595	3.64799	1.39937	20.3798	8.36386	43.1389	10.6484	115.304	20.2952	11.111	3.67985	30.7453	268.287	11243.8	0.299143	0.193351	6.85266	1	0.5	227.086	3.34949	25.9862	197.751	59.039	1.54715	0.119688	776.234
219	0.145153	17.0109	0.560872	5.31382	8.60085	1.52878	36.8097	12.4034	135.959	47.856	204.777	46.1081	439.999	75.6605	112.277	113.443	295.221	1350.81	11586.8	1.30046	0.807313	15.9726	1	0.5	1032.73	23.0307	195.302	814.4	35.3615	1.61085	0.384264	867.915
220	0.241519	23.0056	0.11092	1.72472	3.10107	1.27117	16.3642	5.85398	70.2769	28.1676	131.293	31.7299	335.893	65.2997	40.1095	72.6226	94.7968	804.568	8735.01	1.31418	0.485501	6.77142	1	0.5	714.334	25.0827	96.8674	592.384	23.6172	2.70684	0.766087	775.047
221	0.396813	14.4091	0.66188	5.13905	6.38545	1.57048	26.2134	9.17076	109.044	39.5339	169.757	38.0948	365.118	62.0796	173.984	204.548	409.308	1105.21	10104.7	2.24216	1.49694	3.58187	1	0.5	847.574	20.6068	152.384	674.583	32.7359	1.49783	0.49974	715.346
222	0.0328437	2.2358	0.136642	1.49009	3.43206	0.431135	14.8365	4.62127	41.4244	12.8336	47.3121	9.45315	88.3607	14.2244	143.112	55.4546	366.761	362.754	11980.6	0.491644	0.28763	13.1143	1	0.5	240.825	3.89538	64.7453	172.184	44.2021	1.70929	0.151201	845.151
223	0.02	5.86	38.01	173.544	46.773	7.35645	68.1962	17.7867	172.224	53.6858	224.333	49.2708	473.451	81.4558	66.6317	105.017	144.881	1609.33	9349.76	2.3153	1.10011	14.8707	1	0.5	1411.97	217.434	312.337	882.197	4.05731	2.10461	0.724849	859.557
224	0.149656	26.2126	0.607857	6.10923	6.39769	2.46128	22.0968	7.10204	83.4834	27.2344	116.637	25.7473	250.798	41.8191	100.816	124.539	222.043	792.619	10945.8	2.38942	1.19037	11.6219	1	0.5	616.856	33.0794	121.541	462.236	13.9735	2.00729	0.560877	831.646
225	0.152437	3.99374	0.308036	4.81641	9.70842	3.22875	50.0293	15.3196	166.725	56.0683	221.846	43.8869	388.468	63.3942	30.5654	47.0769	63.9496	1511.96	8369.04	1.79951	0.793978	11.0607	1	0.5	1027.95	9.27062	245.011	773.664	83.4533	2.26645	0.736156	826.207
226	0.016531	8.73008	0.0383974	0.836032	1.20065	0.697603	7.5589	2.10176	21.1985	6.71971	26.5502	5.66143	54.1593	8.9622	34.7022	48.7078	69.9029	190.498	10044.7	0.714434	0.336432	7.13864	1	0.5	144.431	9.62104	32.7574	102.053	10.6073	2.12356	0.696793	780.324
227	0.195552	9.87917	0.735403	5.56715	5.58971	1.2147	16.0659	5.56377	64.0298	22.9982	100.537	24.6239	249.054	42.451	78.3267	63.1411	172.839	690.086	12256.3	1.52651	1.31405	6.9434	1	0.5	548.505	16.3773	92.4639	439.664	26.846	1.16168	0.365318	777.547
228	3.18933	90.7404	10.2631	74.2174	56.1272	19.8329	97.7379	25.7669	228.748	57.6719	202.063	43.5212	400.34	67.7319	221.756	487.978	410.999	1633.43	11291.6	2.005	0.647082	18.4776	1	0.5	1377.95	178.41	428.213	771.328	4.32334	3.09852	1.1873	885.34
229	0.00572502	10.0488	0.0332121	0.666142	1.13881	0.41405	4.91654	1.46112	17.0021	5.89824	26.5314	6.02985	60.9855	10.6782	58.4954	76.0487	100.013	178.737	7995.02	0.56172	0.294334	12.4923	1	0.5	145.81	10.7539	24.9326	110.123	10.2403	1.90844	0.760386	839.68
230	0	6.22282	0.0282717	0.614703	1.14103	0.0609061	7.80356	2.48826	32.5175	12.6278	57.4005	13.6211	136.156	24.0977	79.6832	85.5899	138.796	367.955	11886.8	1.41956	1.14496	6.2674	1	0.5	294.78	6.86579	44.0112	243.903	35.5243	1.23984	0.616659	767.414
231	0.0236412	19.6661	0.305084	4.85202	6.36332	2.07494	26.1825	7.40985	79.358	27.3714	120.216	26.909	262.45	46.0656	14.6529	24.0985	23.499	798.418	7963.44	0.579696	0.164455	4.74895	1	0.5	629.248	24.8468	121.389	483.012	19.4396	3.52495	1.02551	740.926
232	0	2.36321	0.0403547	0.95285	2.39798	0.266626	12.2006	3.88833	44.1953	15.1429	63.046	13.5053	127.462	21.5314	221.426	145.86	401.465	456.604	10680.3	0.766244	0.748192	4.87986	1	0.5	306.993	3.35642	62.9488	240.688	71.7097	1.02413	0.36332	743.463
233	0.0234704	10.7346	0.0408452	0.762979	3.24987	1.04149	23.8947	8.22163	99.0343	36.2414	161.023	35.4119	343.52	59.5525	141.04	113.963	239.915	1073.17	10110.9	2.03844	0.766584	7.67791	1	0.5	782.753	11.5619	135.442	635.749	54.9864	2.65912	0.475016	787.687
234	0	11.0504	0.020813	0.422661	0.922923	0.12015	4.32814	1.75105	23.4664	9.96047	51.9668	14.4674	165.118	33.1251	48.837	72.6072	77.0868	326.413	12232.2	1.08209	1.15797	3.13046	1	0.5	316.721	11.4939	30.5887	274.638	23.8943	0.934477	0.941889	703.579
235	0	21.2852	0.0586828	0.793121	1.68563	0.205388	9.21085	3.13141	35.7609	13.5105	60.9339	13.8822	141.49	24.8769	26.5478	42.1271	42.6262	395.271	11928.1	1.03797	0.577708	5.00391	1	0.5	326.824	22.137	49.9941	254.693	11.5053	1.7967	0.988292	745.815
236	1.41845	10.0862	0.385635	2.85292	3.53482	0.268198	15.4479	4.74298	57.6696	21.3148	94.0636	20.3672	198.651	34.426	54.7908	52.6984	95.1021	591.329	9367.87	1.00305	0.609399	4.36037	1	0.5	465.23	14.7432	81.6635	368.823	25.0165	1.64596	0.554125	733.045
237	8.5599	24.0143	2.57715	12.2356	3.46511	0.743037	10.7107	3.26221	40.8024	17.2591	85.1192	21.4251	239.014	47.449	35.7187	28.3977	62.5288	528.296	9519.03	0.72589	0.459886	6.84246	1	0.5	516.636	47.387	58.9834	410.266	8.65777	1.57841	0.454154	776.086
238	0.0223049	5.41747	0.158404	3.00683	5.51573	3.17163	33.0098	11.0936	136.455	51.0087	237.971	57.3169	607.184	115.285	95.1554	103.5	141.769	1565.53	7286.87	0.902697	0.52335	8.3819	1	0.5	1266.62	8.60501	189.246	1068.77	124.203	1.72484	0.730064	796.696
239	0.043968	21.8432	0.575785	9.36631	18.74	1.38331	84.6843	26.3523	296.329	100.729	414.686	86.7798	808.766	129.25	3.80652	104.395	129.787	2774.16	7264.04	3.14858	0.663993	5.5323	1	0.5	1999.53	31.8292	427.489	1540.21	48.3898	4.7419	0.804351	755.334
240	0.706284	44.769	0.436018	4.31312	5.66528	2.28505	24.6055	8.39925	94.3905	33.5082	146.839	34.0588	338.337	57.1375	8.71381	467.052	230.057	1025.12	8567.49	1.98726	0.83208	12.0547	1	0.5	795.451	50.2245	135.346	609.881	12.1431	2.38831	2.03016	835.699
241	0.0212058	6.08447	0.0365565	1.09745	2.76012	0.343048	15.306	5.0815	61.9558	23.5295	103.235	22.851	220.384	38.3885	4.51632	73.4323	118.552	666.215	6734.79	0.794339	0.350143	4.39758	1	0.5	501.074	7.23968	85.4465	408.388	56.4097	2.26861	0.619412	733.824
242	0.00676335	109.986	0.209538	4.31209	8.37562	2.82285	44.1904	15.5625	193.123	75.3294	347.757	80.2542	802.487	136.855	8.04462	186.546	155.662	2182.24	8715.26	10.2685	2.15985	6.47859	1	0.5	1821.27	114.514	264.074	1442.68	12.5983	4.75428	1.1984	770.671
243	0.02	5.86	40.4315	185.553	37.5224	2.68529	45.9067	10.289	111.516	40.8962	189.733	45.6096	460.197	78.6467	13.5409	176.899	286.43	1235.44	11582.9	11.9582	3.37358	4.62815	1	0.5	1254.87	231.864	207.919	815.083	3.51534	3.54465	0.617601	738.534
244	0.00586766	24.7435	0.0403961	0.716069	2.23982	0.742562	12.3325	4.14486	55.0891	23.1017	120.971	32.3663	361.875	69.7276	24.1026	231.015	527.719	756.327	11512.8	4.5626	1.54809	3.63954	1	0.5	708.096	25.5058	74.5488	608.041	23.8393	2.94725	0.437761	716.76
245	0.0113205	35.4325	0.107288	2.07393	4.58386	1.05091	22.427	7.57228	100.167	37.785	171.976	39.3575	393.11	65.3824	7.42455	134.514	142.953	1073.79	9917.06	3.09607	1.50547	7.35719	1	0.5	881.037	37.6251	135.801	707.611	18.8069	2.05655	0.940965	783.361
246	0.0413796	23.0274	0.146379	2.06931	4.69757	0.582409	28.7417	9.88042	121.08	45.206	198.355	44.3122	412.062	68.7127	30.5035	516.113	581.964	1302.2	10772.8	2.17172	1.20202	5.59568	1	0.5	958.915	25.2845	164.982	768.648	30.4	1.80672	0.886846	756.425
247	1.73782	19.2873	0.461482	2.87017	2.71622	0.738504	14.9814	5.58759	70.0203	28.6502	127.854	31.2785	330.934	58.6665	25.0952	306.599	517.53	824.432	9751.19	1.29973	0.964528	8.28505	1	0.5	695.784	24.3568	94.0441	577.383	23.7052	1.34753	0.592427	795.494
248	0	21.5312	0.048617	1.35511	3.69406	0.420519	20.5042	6.85733	87.2817	32.7054	143.738	33.281	322.927	52.5881	8.58433	125.718	166.276	912.595	9635.37	3.19277	1.30274	7.22369	1	0.5	726.933	22.9349	118.758	585.24	25.5174	2.45081	0.756076	781.514
249	0.0120112	14.1202	0.034618	0.449334	1.20484	0.670754	7.63678	2.49268	31.3532	13.2259	66.905	17.3334	193.305	38.5357	3.97294	73.8701	66.3306	418.417	10294.4	0.925518	0.370559	4.69472	1	0.5	387.279	14.6161	43.3582	329.305	22.5302	2.49763	1.11367	739.859
250	98.7216	213.045	22.4005	94.2986	17.9517	1.39162	25.3984	6.82016	80.44	32.8074	160.823	41.0087	447.332	82.5577	8.75461	141.197	148.445	1010.15	10992.5	4.13202	1.36044	6.54631	1	0.5	1325	428.465	132.002	764.529	1.78434	3.03727	0.951174	771.697
251	23.4379	83.4182	5.23138	23.2221	5.60498	1.57581	16.8692	4.78505	61.1936	24.9289	119.342	31.6757	336.389	63.8322	22.3094	415.854	348.591	788.411	10468.4	3.31393	1.35314	3.56735	1	0.5	801.505	135.31	90.0286	576.167	4.25814	2.44906	1.19296	714.987
252	0.0144428	16.431	0.0415096	0.833407	2.04239	0.528278	13.9606	4.92024	62.8147	25.2358	121.773	30.6639	317.345	58.3166	5.73124	73.8344	99.962	781.772	10147.6	2.13262	1.06405	5.47809	1	0.5	654.921	17.3203	84.2662	553.334	31.9471	2.00425	0.738625	754.392
253	0.00607167	35.8724	0.0626343	1.09007	2.27057	1.26891	15.1369	5.31306	73.1941	30.9196	163.115	42.4057	479.755	91.9655	11.2373	213.563	175.176	999.103	9192.58	3.85299	1.22007	3.59714	1	0.5	942.375	37.0312	97.1835	808.161	21.8238	3.15802	1.21913	715.723
254	9.78299	82.7527	3.36302	20.1998	13.7445	5.19233	32.1224	10.4059	114.186	37.8131	170.546	41.2198	425.338	72.3672	43.1911	504.984	700.493	1154.78	11458.5	4.90779	3.55238	12.1018	1	0.5	1039.03	116.099	175.651	747.284	6.43664	1.38155	0.720899	836.133
255	0.0477068	10.9089	0.247819	3.97854	7.24846	2.44671	42.9011	14.0491	165.23	61.881	265.717	56.7568	533.456	90.9097	5.74674	88.8614	91.3045	1722.95	7405.68	1.32458	0.535026	13.6766	1	0.5	1255.78	15.1829	231.876	1008.72	66.4378	2.47573	0.973242	849.922
256	0.0120287	17.2817	0.0901474	1.45234	2.97012	0.835451	13.8933	3.91042	44.4983	15.81	65.5059	14.9143	146.521	25.6413	3.8213	51.6011	61.4998	453.833	9013.64	1.04141	0.496318	11.5733	1	0.5	353.337	18.8362	66.1076	268.393	14.2488	2.09827	0.839045	831.184
257	51.6627	147.197	15.5086	75.6645	18.5038	0.369865	41.5425	11.8945	145.406	55.3593	249.489	57.1503	557.051	93.1156	19.1281	188.801	318.252	1608.41	11333.3	11.674	3.55017	3.39257	1	0.5	1519.91	290.033	217.717	1012.16	3.48983	3.2883	0.593245	710.569
258	18.1077	118.429	6.44725	32.0883	15.7253	6.09347	36.1002	10.9386	120.483	37.2397	157.96	36.7471	370.304	65.2736	17.724	226.612	244.999	1076.15	11062.5	3.67931	1.63548	9.60837	1	0.5	1031.94	175.073	189.34	667.524	3.81284	2.24968	0.92495	811.027
259	0.0403427	22.5412	0.162241	2.52266	3.86731	1.40519	15.4339	4.66782	52.8034	19.4141	87.6947	21.1779	215.356	38.2885	6.25115	114.133	85.1287	603.256	7403.49	1.00225	0.618221	3.84615	1	0.5	485.376	25.2665	78.1776	381.931	15.1161	1.62118	1.34071	721.68
260	0.0175151	34.3215	0.074079	1.3904	2.09495	0.602843	11.728	3.72643	43.4869	16.5995	78.53	19.6654	205.865	37.0668	17.3318	234.461	262.11	519.041	10462.3	2.45667	1.20781	3.98047	1	0.5	455.169	35.8035	61.6392	357.726	9.99138	2.03399	0.894513	724.764
261	1.40746	70.7436	3.32641	27.6315	28.998	13.7018	78.7252	26.8406	266.312	80.4422	304.794	64.7326	610.965	87.3409	20.9247	411.717	296.261	2244.39	9903.14	2.50326	0.556685	20.2919	1	0.5	1665.96	103.109	414.577	1148.27	11.1365	4.49672	1.38971	896.826
262	0.016973	31.8999	0.0458923	0.753106	2.47327	0.65674	13.0066	4.54525	57.134	22.5974	109.647	27.8101	295.128	53.7654	13.9658	192.594	185.866	708.501	10389.4	3.35155	1.42475	4.38814	1	0.5	619.479	32.7158	77.8158	508.948	15.5566	2.35238	1.03619	733.627
263	0.0115686	20.8029	0.113955	2.34973	3.97341	1.38105	13.6228	3.64283	35.2783	11.6733	52.738	11.9869	123.972	22.5125	5.06979	67.6546	56.1359	361.191	9550.17	0.204315	0.0808927	8.8941	1	0.5	304.059	23.2781	57.8984	222.882	9.57475	2.52575	1.20519	802.874
264	0.00573667	4.91594	0.0665101	1.41131	4.72315	0.107552	32.7283	12.5091	161.774	61.5869	272.634	59.337	563.043	90.8628	15.5137	108.579	191.712	1752.61	11834.8	1.97917	1.14448	8.34892	1	0.5	1265.71	6.39949	211.842	1047.46	163.679	1.72931	0.566364	796.288
265	0.00616468	7.35648	0.0635063	0.93883	1.37822	0.0924048	7.77571	2.47379	29.5852	10.8788	51.3767	11.741	120.711	20.4735	9.41899	51.8368	62.7507	322.761	8440.5	1.13482	0.583676	13.0866	1	0.5	264.852	8.36498	41.3054	215.182	25.7241	1.94426	0.826076	844.912
266	0.00575974	9.26605	0.0801106	1.10144	2.58499	0.0539521	16.0275	5.23967	68.3672	24.6524	108.604	24.2778	227.959	36.5412	60.6861	204.799	395.803	670.307	11331.2	7.10414	4.07236	8.27013	1	0.5	524.761	10.4534	92.2733	422.034	40.3731	1.74448	0.517428	795.308
267	0.00605651	59.9452	0.11156	2.18123	4.9061	1.38081	25.932	9.42912	117.356	44.0675	188.992	42.6196	396.029	62.233	40.0801	139.288	155.6	1215.05	10340.7	6.88571	2.5442	8.6858	1	0.5	955.189	62.2441	159.004	733.941	11.7913	2.70643	0.895169	800.397
268	0.0118615	11.1025	0.0717764	1.99651	2.81432	0.289434	12.1699	3.33082	37.2602	12.6345	51.8941	11.072	101.996	17.1279	19.6699	60.6199	78.7481	343.519	9591.52	3.51544	1.86986	20.7454	1	0.5	263.772	13.1826	55.8646	194.725	14.7713	1.88005	0.769796	899.57
269	0	20.9865	0.0409579	0.725978	1.23848	0.295532	8.27966	3.15353	44.8323	17.5746	88.3943	22.1479	233.91	41.5323	24.9445	67.2406	81.8995	540.742	10843.4	1.47169	0.66474	9.07011	1	0.5	483.112	21.7534	57.7995	403.559	18.5515	2.21394	0.821013	804.931
270	0.043267	1.49214	0.0994929	2.35	7.12781	0.127538	51.62	21.0204	264.615	99.4946	422.869	88.6402	797.807	125.275	139.969	121.894	420.836	2817.28	11940.6	0.955253	0.578943	7.33761	1	0.5	1882.58	3.9849	344.511	1534.09	384.975	1.64999	0.289647	783.091
271	0.671999	7.38508	1.32766	11.494	12.3357	3.08173	54.18	16.7711	190.155	65.4095	260.036	53.0778	483.055	77.059	22.9284	47.3034	64.1976	1747.56	8446.73	1.6251	0.913739	10.8524	1	0.5	1236.04	20.8788	276.523	938.637	44.9565	1.77852	0.73684	824.132
272	0	28.5333	0.107525	1.78056	3.57617	1.28232	16.7825	5.08539	57.354	20.556	92.6357	21.7632	214.009	38.6451	29.5883	83.2408	78	616.382	8579.98	1.3393	0.725537	10.211	1	0.5	502.11	30.4214	84.0804	387.609	12.7413	1.84594	1.06719	817.535
273	18.5016	51.2312	5.97629	30.5164	11.4778	0.39065	36.4253	10.6121	114.833	39.7531	167.833	34.6066	320.773	52.1949	16.8271	43.9782	43.6431	1094.97	9715.02	3.00666	1.20827	12.2466	1	0.5	895.125	106.225	173.739	615.161	5.79109	2.4884	1.00768	837.459
274	0.065124	8.07893	0.249179	4.4705	7.28658	0.744623	30.1912	7.1505	70.339	21.8663	85.4802	17.7986	159.147	25.6695	110.071	283.051	287.149	641.689	9425.76	3.16043	1.02256	11.4832	1	0.5	438.537	12.8637	115.712	309.962	24.0958	3.09069	0.985728	830.322
275	0.00577727	10.1245	0.0368412	0.987107	2.52474	0.124576	12.9543	4.50615	56.8898	21.5561	94.7308	21.0794	200.61	32.9119	30.5938	46.3599	88.3542	591.285	11729.4	7.80702	2.82842	7.30977	1	0.5	459.042	11.1542	76.9996	370.888	33.2509	2.7602	0.524705	782.708
276	0.0618115	7.47805	0.6781	9.72723	14.3907	1.04524	50.8346	14.3137	142.583	46.5039	182.632	37.8401	340.937	52.521	8.83421	24.5812	23.2044	1259.48	9027.83	1.53526	0.595231	17.7543	1	0.5	901.545	17.9452	223.167	660.433	36.8028	2.57926	1.05933	880.511
277	0.182474	16.4046	0.492302	3.77616	4.42901	0.736745	20.3141	7.37297	94.3378	34.8778	160.02	37.0858	366.429	60.7455	169.537	116.595	514.286	1008.29	12152.8	3.98248	3.86434	6.63227	1	0.5	807.204	20.8555	127.191	659.158	31.6059	1.03057	0.226712	772.987
278	0	4.46087	0.0326734	0.750752	1.47445	0.147842	8.53932	2.94226	32.8456	12.0651	53.4816	11.6065	112.196	18.7834	7.68832	12.4532	21.8011	336.966	9530.86	2.72518	1.04062	11.2054	1	0.5	259.326	5.24429	45.9494	208.133	39.6875	2.6188	0.571219	827.631
279	0.0173792	3.78307	0.110268	1.49798	3.79983	0.337157	23.2068	8.70794	115.038	44.3811	199.771	46.7495	460.783	79.9444	139.217	110.375	392.701	1252.49	12095.1	1.73832	1.15451	7.73131	1	0.5	988.127	5.4087	151.09	831.629	153.758	1.50568	0.281067	788.394
280	6.71077	27.9402	2.15793	13.6471	11.2988	0.410452	43.8564	13.4298	142.212	50.8696	206.825	43.535	397.526	62.9429	26.6441	63.5789	66.7717	1372.55	10210.5	4.78441	1.79507	7.95224	1	0.5	1023.36	50.456	211.207	761.698	15.0963	2.6653	0.952182	791.274
281	0.133502	17.8374	0.234047	3.38962	4.56079	0.483042	20.3096	5.81538	68.003	25.2011	112.469	25.4873	243.111	41.9641	13.3028	39.1334	30.2477	723.304	8220.83	3.79574	0.89898	11.741	1	0.5	568.998	21.5946	99.1719	448.232	20.7567	4.22228	1.29376	832.773
282	0	16.7557	0.0430457	0.937191	1.9603	0.241091	12.1291	4.44749	55.3441	21.8153	97.5961	22.1968	223.313	37.4309	54.3621	108.136	140.371	607.833	11263.8	2.13868	1.33579	12.9746	1	0.5	494.21	17.7359	74.1221	402.352	22.6857	1.60106	0.77036	843.94
283	7.29135	60.2578	1.86134	10.0717	5.63936	1.28691	19.6936	5.33272	56.213	20.1299	84.9902	19.011	186.816	31.2895	48.315	95.4321	120.398	567.453	9048.67	4.12499	1.40414	13.1935	1	0.5	509.885	79.4822	88.1656	342.237	4.30583	2.93773	0.792641	845.833
284	0.0853646	12.346	0.227627	2.5861	5.57386	0.810837	24.6783	7.93459	88.9886	30.0078	126.982	27.2774	251.692	41.1669	211.649	243.489	569.316	877.888	11146.4	1.81947	1.71122	9.81305	1	0.5	620.358	15.2451	127.986	477.126	31.2969	1.06326	0.427687	813.274
285	0.0838258	1.11748	0.116632	1.68059	5.82199	0.0785937	40.1174	15.8258	200.942	75.0162	325.098	68.8062	623.307	100.805	120.34	70.7369	328.382	2154.24	11883.3	0.413059	0.4793	6.32823	1	0.5	1458.82	2.99853	262.785	1193.03	397.872	0.861795	0.21541	768.361
286	0.0347714	1.82693	0.139537	2.57223	7.44031	0.304166	30.7385	9.09371	101.083	34.4923	147.641	31.2696	286.298	44.441	87.6379	139.782	216.75	1003.58	11629.5	0.740816	0.313159	8.54783	1	0.5	697.375	4.57346	148.66	544.142	118.978	2.36563	0.644898	798.73
287	0.0674272	3.04782	0.179105	2.17977	5.00977	0.384857	28.4944	10.3055	128.293	48.0608	214.408	49.216	478.573	78.1518	115.151	59.7829	321.112	1393.79	11398.2	0.656683	0.673989	9.26402	1	0.5	1046.37	5.47412	172.488	868.409	158.639	0.974324	0.186174	807.16
288	0.0354665	1.37809	0.0507609	0.960433	2.57479	0.315675	11.9558	3.45178	32.8758	6.97598	17.3258	2.82174	20.5228	2.69341	185.427	24.1005	537.544	233.004	12848.2	0.198637	0.314303	14.8087	1	0.5	103.938	2.42475	51.1738	50.3397	20.7607	0.631992	0.0448344	859.072
289	0.011516	45.0128	0.159489	1.97927	4.06586	1.10817	17.4842	4.93316	51.2173	17.9191	73.2557	15.736	148	25.2417	20.7226	47.1087	47.7905	508.341	9349.24	3.33524	1.07669	11.6151	1	0.5	406.125	47.1631	78.8087	280.153	5.94009	3.09768	0.985734	831.581
290	0.081971	1.89459	0.175312	2.08925	5.37554	0.318639	31.1502	12.2849	152.102	53.0037	221.765	46.1239	408.86	63.8301	141.57	122.075	368.826	1557.81	12410.2	0.726403	0.651806	5.83374	1	0.5	999.055	4.24113	201.231	793.583	187.116	1.11445	0.330983	760.437
291	0.136651	6.00753	0.217309	1.89464	4.86168	0.541477	38.0641	15.6483	179.097	57.6253	235.559	48.6099	439.403	69.3758	127.131	60.9639	343.162	1677.43	11525.4	1.01193	0.642231	7.18538	1	0.5	1097.04	8.25613	238.213	850.573	103.023	1.57564	0.177654	780.979
292	0.0300587	3.94464	0.269949	3.37046	6.95705	0.451242	43.1473	15.3169	190.245	69.0872	292.207	62.4515	586.384	94.2163	74.2023	52.6312	192.12	1957.25	11633.6	0.67906	0.461161	15.6216	1	0.5	1368.08	7.61511	256.117	1104.35	145.021	1.4725	0.27395	865.304
293	0.0731647	76.4963	0.389783	7.69558	14.7525	2.54677	67.917	21.5032	246.121	88.2451	382.903	84.1556	784.559	122.297	232.002	485.95	479.765	2538.33	9573.57	6.22467	2.00936	15.0812	1	0.5	1899.65	84.6548	352.84	1462.16	17.272	3.09785	1.01289	861.19
294	94.1111	243.68	30.8567	141.343	27.0778	1.51738	30.2506	5.95797	58.953	19.7038	90.7395	21.8192	231.091	42.6843	108.88	108.641	234.596	589.362	10939.5	2.05329	1.08701	5.86977	1	0.5	1039.79	509.991	123.757	406.038	0.796166	1.88893	0.463099	761.032
295	0.0183237	20.728	0.0875205	2.11055	3.79122	0.755137	16.477	4.73493	51.5731	17.838	77.0258	17.4387	166.42	28.4213	19.1234	25.7653	38.0398	542.817	8917.02	1.77669	0.588776	8.44846	1	0.5	407.419	22.9444	77.3314	307.144	13.3865	3.01759	0.677325	797.516
296	0.0974635	14.1956	0.14125	1.124	2.13918	0.549563	8.53012	2.77441	34.9561	12.9926	56.3505	12.9536	125.129	22.0207	108.899	81.9882	222.523	379.025	11650.7	1.03744	0.828482	14.5993	1	0.5	293.954	15.5583	48.9493	229.447	14.7476	1.25222	0.368449	857.422
297	0.159673	32.4215	0.473763	5.58882	6.38106	1.82019	22.8017	6.38178	68.3133	24.7072	110.13	26.4489	269.033	49.4665	127.134	182.744	233.236	742.55	9728.86	1.56595	0.566556	9.54233	1	0.5	624.128	38.6437	105.698	479.786	12.4156	2.76399	0.783514	810.294
298	10.4467	33.8411	1.96076	7.65322	4.39091	0.508842	18.4181	5.77173	66.8951	25.4187	114.722	25.237	253.382	44.0128	88.0015	127.822	157.551	739.931	8852.3	1.9001	0.493862	4.56741	1	0.5	612.659	53.9017	95.9847	462.773	8.58549	3.84743	0.811305	737.313
299	0	11.6066	0.0560959	1.18659	1.8432	0.240166	8.40355	2.99914	34.579	13.136	59.509	13.428	134.078	23.1803	34.7635	21.4236	69.8473	383.372	10529.9	1.81092	0.89274	17.4493	1	0.5	304.246	12.8492	48.065	243.331	18.9374	2.02849	0.306721	878.429
300	0.0117835	8.43454	0.0375834	0.946921	1.99968	0.193496	13.4099	4.7833	55.6793	20.3262	88.4429	19.0275	178.007	29.1957	47.5949	45.7416	91.5333	579.713	9869.04	2.54781	1.01719	7.07339	1	0.5	420.496	9.43083	76.0657	334.999	35.5217	2.50474	0.499726	779.402
301	0	23.9708	0.049541	0.836384	1.95034	0.39899	11.6776	3.68531	45.8753	17.074	76.9962	17.889	172.847	31.1426	5.48592	9.69061	9.12018	524.704	10311.9	1.63515	0.295828	5.73093	1	0.5	404.394	24.8567	63.5875	315.949	12.7108	5.52739	1.06255	758.721
302	0.0120608	17.3592	0.0242128	0.592746	1.25557	0.197845	8.36773	2.82914	36.8372	14.2355	64.0468	14.5814	138.247	22.6619	40.9612	46.4908	73.0943	415.018	11478.8	1.75278	0.664982	4.15552	1	0.5	321.248	17.9882	49.4875	253.773	14.1077	2.63583	0.636038	728.656
303	0.00611279	15.9284	0.0843838	1.45307	3.77235	0.458721	16.6286	5.00136	51.0221	17.5966	71.1117	15.4128	142.649	24.273	94.9639	92.5347	170.224	508.95	10469.6	1.11939	0.703991	11.8997	1	0.5	365.398	17.4719	76.8831	271.043	15.5131	1.59006	0.543607	834.261
304	2.10857	18.0342	1.62944	16.1924	17.673	0.816271	67.2929	18.1606	193.179	64.704	257.957	52.4958	470.99	74.0551	128.289	210.953	206.391	1741.18	6845.35	1.99566	0.689955	4.4337	1	0.5	1255.29	37.9646	297.122	920.202	24.2384	2.89244	1.0221	734.575
305	23.0491	87.6907	8.98074	40.366	10.1356	0.501093	14.5607	3.92119	44.4032	16.5668	81.3459	19.8965	206.47	36.9939	68.4468	145.734	101.162	515.71	12774.7	2.67675	1.48416	11.7951	1	0.5	594.882	160.087	73.5217	361.273	2.25674	1.80355	1.4406	833.282
306	0.0279202	33.2618	0.10897	2.80236	3.96189	1.13079	14.5628	3.69624	36.4306	11.6982	46.9428	10.548	104.773	18.5513	110.752	175.906	170.657	358.98	8826.28	1.07833	0.655038	5.93062	1	0.5	288.496	36.201	59.7823	192.513	5.31788	1.64621	1.03076	762.031
307	0.106861	16.4017	0.251034	1.80625	2.08491	1.05432	6.14698	2.07524	24.1155	8.39723	38.4741	9.29757	105.991	21.7267	153.511	117.129	277.167	265.064	11752.5	0.804162	0.612181	3.18003	1	0.5	237.929	18.5658	35.4769	183.886	9.90456	1.3136	0.422593	704.937
308	0.022424	12.043	0.295797	5.53855	9.51436	2.38734	51.1154	15.9417	174.719	61.6004	255.1	53.8784	511.126	85.3296	68.0014	91.1029	112.602	1751.88	9783.27	1.77499	0.890477	3.97399	1	0.5	1238.61	17.8998	253.678	967.035	54.0248	1.9933	0.80907	724.617
309	0	47.5183	0.1282	3.58703	5.10093	1.14474	22.1634	6.37942	67.4578	22.0677	94.2295	20.6149	199.279	33.5515	42.6918	75.7557	65.5326	659.6	9366.63	2.72286	1.04885	11.8633	1	0.5	523.222	51.2335	102.246	369.742	7.21681	2.59604	1.156	833.921
310	0.0121112	37.8666	0.267057	3.60873	6.51305	1.4299	23.0967	7.3234	74.7087	25.4601	104.608	23.7217	225.454	35.7175	23.7797	37.9672	37.4677	714.018	8724.11	1.90812	0.648783	18.8421	1	0.5	569.788	41.7545	113.072	414.962	9.93812	2.94108	1.01333	887.717
311	7.29359	50.2209	1.90726	11.4988	6.238	1.26951	20.2425	6.01726	62.5572	21.8858	93.8194	20.3288	201.153	33.1777	31.4464	66.3547	46.1563	641.091	8774.48	1.89068	0.70804	16.0107	1	0.5	537.61	70.9205	96.3245	370.365	5.22225	2.6703	1.43761	868.196
312	0.0184586	27.6159	0.207834	3.0332	4.80407	1.4077	16.0583	4.33912	48.1791	14.8942	60.647	13.2479	128.928	20.9398	14.1017	29.6701	20.4135	444.354	8361.47	1.51033	0.57942	14.3538	1	0.5	344.321	30.8754	74.7883	238.657	7.72968	2.60662	1.45345	855.464
313	0	6.66889	0.0682098	1.12895	2.7995	0.507589	17.2939	6.7516	85.0621	31.7195	146.163	33.1045	323.396	53.6581	51.9042	55.7704	83.263	932.681	9812.63	1.40841	0.882339	5.28323	1	0.5	708.322	7.86605	112.415	588.042	74.7569	1.59623	0.66981	750.944
314	0.0276528	14.5443	0.124479	2.08947	3.58435	1.02808	20.7376	6.90858	84.928	31.5994	138.604	30.8833	302.596	51.7191	241.224	200.008	388.774	929.258	9656.66	1.03517	0.861386	15.3253	1	0.5	689.374	16.7859	117.187	555.402	33.0874	1.20175	0.514457	863.063
315	0.0946273	0.799985	0.0370905	0.545913	1.55821	0.118448	9.13251	2.75206	27.2184	7.84925	37.3222	9.1233	118.25	21.8322	181.417	31.1614	607.943	271.195	13534.1	0.518782	0.734527	36.6692	1	1	236.634	1.47762	40.7796	194.376	131.547	0.706281	0.0512571	884.397
316	0.048587	1.53385	0.0803822	1.27318	2.88694	0.249697	8.41786	1.67928	14.2267	4.05117	21.7251	5.15995	70.8412	13.2917	117.3	48.8423	350.594	140.008	11946.8	0.442222	0.550241	41.4993	1	1	145.465	2.936	27.4604	115.069	39.1924	0.803689	0.139313	899.596
317	0.286398	56.923	0.927173	11.6126	15.9019	6.33244	55.32	16.0335	181.689	56.0354	244.345	48.3481	516.489	84.3891	47.2154	334.981	353.043	1903.85	8797.84	8.59699	1.49563	11.056	1	1	1294.63	69.7491	275.277	949.607	13.6146	5.74809	0.948837	755.259
318	0.00858029	1.08718	0.0591482	1.16137	3.08026	0.156176	9.91962	1.60327	9.14058	1.43516	4.60691	0.83979	9.45614	1.75719	105.957	43.3727	234.086	55.2047	11963.6	0.328237	0.189075	41.4202	1	1	44.3114	2.31628	23.8999	18.0952	7.81219	1.73601	0.185286	899.358
319	0.0607982	54.0353	0.134691	2.32598	5.05621	1.78939	26.4886	8.98429	123.283	45.1902	226.644	49.1313	559.272	97.2897	42.2958	280.935	415.704	1572.88	10953.2	12.3402	2.47098	6.13804	1	1	1199.69	56.5568	165.602	977.527	17.284	4.99404	0.675804	701.871
320	0.0276143	4.43403	0.218554	4.29398	9.71895	0.582868	31.1238	6.92677	67.5666	18.725	73.4123	14.3212	136.529	21.4627	436.043	134.477	1450.81	629.09	44088.7	0.853979	0.516717	39.0985	1	1	389.344	8.97418	115.919	264.451	29.468	1.6527	0.0926913	892.227
321	0.0140114	3.34203	0.19762	5.49198	14.8787	0.900743	44.9004	6.42759	35.313	6.83272	21.7203	4.10936	33.6433	3.9045	287.925	97.9977	936.029	239.757	36573.6	0.917272	0.192974	33.9444	1	1	181.676	9.04564	102.42	70.2101	7.76177	4.75336	0.104695	875.112
322	0.0395067	3.63141	0.135702	3.01863	9.52163	0.658236	29.9497	4.75603	25.0374	3.64016	7.74782	0.995615	7.42824	0.889079	410.603	118.464	1353.81	121.292	41899.9	0.771285	0.290534	31.5766	1	1	97.4492	6.82526	69.923	20.7009	3.03299	2.65472	0.0875042	866.55
323	0.140067	1.20433	0.103553	0.815187	0.615773	0.621147	2.47477	0.759995	9.29298	3.94264	20.9451	5.51401	67.1341	16.4852	70.7595	2.42502	181.711	131.069	8546.65	0.308927	0.212624	9.17684	1	0.7	130.049	2.26313	13.7647	114.021	50.382	1.45293	0.0133455	771.826
324	0.160272	2.68695	0.184648	2.02326	1.57572	1.31564	4.53096	0.900526	10.4765	4.22858	21.4055	6.04195	75.2513	19.1194	52.3795	1.24768	138.726	147.677	7833.13	0.304482	0.164845	10.4197	1	0.7	149.901	5.05513	18.7993	126.047	24.9344	1.84708	0.00899383	784.528
325	0.189987	2.98918	0.323646	3.31914	2.10154	4.26666	5.63265	1.11312	14.8965	6.57598	35.7401	10.2007	126.261	29.4993	49.6643	1.4028	129.356	227.574	8021.11	0.358319	0.22291	7.653	1	0.7	243.109	6.82195	28.0104	208.277	30.5304	1.60746	0.0108445	754.189
326	0.101543	3.41252	0.152215	1.71357	1.68101	0.856861	3.2177	1.33303	17.7515	7.72274	44.8904	12.0434	144.411	34.7509	55.4057	2.32182	138.637	265.761	7959.06	0.353073	0.259432	8.89583	1	0.7	274.038	5.37985	24.8401	243.818	45.3206	1.36095	0.0167475	768.763
327	0.0247507	0.85356	0.0666421	1.24823	0.910055	0.9349	2.97169	0.841703	11.7753	5.24527	28.3005	7.76213	94.2431	23.2162	40.2226	0.879801	105.111	171.791	7877.94	0.300594	0.23698	4.54491	1	0.7	178.394	2.19318	17.4337	158.767	72.3912	1.26843	0.00837022	706.727
328	0.01	0.175058	0.00194183	0.0506361	0.111381	0.120067	1.69937	0.712108	9.00785	3.881	18.6329	4.65431	48.5384	11.2309	5.18719	1.00663	13.3256	134.163	9757.03	0.154493	0.0135513	7.0548	1	0.7	98.8259	0.237636	11.6508	86.9375	365.844	11.4006	0.0755415	746.475
329	0.0880003	6.26576	0.0980589	0.958312	0.810341	0.588572	2.48894	0.473941	3.64531	0.863649	2.65037	0.408549	3.04967	0.491394	67.8781	59.0892	163.22	27.1557	10964.3	0.16403	0.0703906	7.91496	1	0.7	22.8809	7.41013	8.00711	7.46363	1.00722	2.33029	0.362022	757.413
330	0.119808	6.27656	0.0515324	0.931576	1.59549	0.705622	5.14091	1.06022	8.96521	2.14121	6.86699	1.07962	9.30593	1.59987	72.804	84.4871	180.254	65.9697	10962.7	0.18199	0.0357022	11.0682	1	0.7	45.8406	7.37948	17.4675	20.9936	2.84487	5.09745	0.468711	790.675
331	1.50647	9.85495	0.976755	6.24933	2.67256	0.752329	5.40988	1.27519	14.0042	5.87348	30.7445	8.21854	94.4957	22.666	19.4093	14.813	45.6131	192.364	8886.23	0.197121	0.107191	4.64245	1	0.7	204.7	18.5875	24.1142	161.998	8.71544	1.83897	0.324752	708.575
332	0.00113444	0.300856	0.00437147	0.0550562	0.281395	0.146809	1.7134	0.845904	12.3514	6.28238	36.8376	10.6973	134.702	34.2339	14.4001	1.62377	37.3524	211.871	8719.34	0.176067	0.0624351	13.3016	1	0.7	238.454	0.361418	15.3389	222.753	616.332	2.81999	0.0434717	809.835
333	0.41387	5.27845	0.386306	2.60772	1.06985	0.443991	3.46754	1.01907	12.4693	5.22749	27.9576	7.09577	82.688	19.0377	101.945	32.7039	252.291	178.076	7560.54	0.244531	0.129887	6.55292	1	0.7	169.163	8.68635	18.4697	142.007	16.3482	1.88264	0.129628	739.58
334	0.378607	4.88713	0.263508	1.86264	0.957958	0.464928	3.02414	1.12789	14.6191	6.75115	37.225	9.84476	119.519	27.0088	108.588	48.5118	267.651	226.692	7409.75	0.176822	0.0616003	5.61243	1	0.7	227.934	7.39189	20.1941	200.348	27.1038	2.87047	0.18125	725.405
335	0.01	0.298798	0.01	0	0.218288	0.113862	2.13116	0.703031	12.0337	5.56335	32.7152	8.41334	101.957	29.2283	28.518	3.67277	65.6399	188.651	8627.22	0.319514	0.0776259	8.65695	1	0.7	193.396	0.318798	15.2	177.877	557.962	4.11607	0.0559533	766.096
336	0.180518	1.24087	0.0839369	0.725732	0.201711	0.540736	4.99964	1.63161	19.425	7.92858	39.8775	10.6333	118.974	31.9627	69.2459	39.109	175.905	275.336	9294.59	0.39483	0.0616615	5.2372	1	0.7	238.406	2.23106	26.7987	209.376	93.846	6.40318	0.22233	719.201
337	1.16942	1.73458	0.243453	0.577795	0.273274	0.145468	1.07291	0.768466	10.7052	4.96947	29.9237	7.50952	91.6072	23.4025	64.4571	28.731	158.886	175.251	9077.97	0.498891	0.0778127	6.85904	1	0.7	174.103	3.72525	12.9653	157.412	42.2555	6.41144	0.180828	743.835
338	0.243462	0.702013	0.0316704	0.297167	0.135389	0.12693	1.71052	0.595791	9.94658	4.86796	28.6427	7.29865	83.4599	23.0563	39.4594	12.3843	98.8095	164.763	8489.26	0.281865	0.0857466	4.3708	1	0.7	161.115	1.27431	12.5152	147.325	115.612	3.28719	0.125335	703.346
339	0.01	0.369285	0.00385257	0.11001	0.0499326	0.0924792	1.08621	0.392099	5.79902	2.60051	13.5774	3.82543	41.0472	10.3939	38.2105	28.2696	86.6625	86.6678	10184	0.46938	0.219495	5.27301	1	0.7	79.3573	0.493148	7.41974	71.4444	144.874	2.13846	0.326204	719.808
340	0.01	0.342365	0.01	0.0180057	0.147269	0.0703389	1.24433	0.545176	7.85438	3.46826	19.9186	5.18026	56.5304	14.2961	46.5364	43.9004	108.93	116.558	9254.26	0.321621	0.12925	4.29467	1	0.7	109.636	0.38037	9.86149	99.3937	261.308	2.48836	0.403015	701.832
341	0.0377829	0.582249	0.0264426	0.242022	0.0678459	0.0634902	0.946194	0.5441	6.03789	2.89726	16.1821	4.12258	48.209	12.4775	44.9088	37.3072	104.683	100.431	9203.54	0.447393	0.131519	4.45904	1	0.7	92.4365	0.888497	7.65952	83.8885	94.4161	3.40173	0.356381	705.073
342	0.0106086	0.364999	0.0148528	0.0637116	0.166701	0.0827456	0.885256	0.399734	5.55267	2.50403	12.4275	3.22503	36.8128	9.07153	54.0339	40.9125	130.722	81.0254	9877.16	0.284871	0.152005	5.1876	1	0.7	71.5822	0.454172	7.08711	64.0409	141.006	1.87409	0.312973	718.354
343	0.496112	0.376176	0.134388	0.488207	0.312927	0.312542	1.41132	0.553976	8.01375	3.78313	21.2542	6.03728	72.1488	18.0194	54.6065	37.5675	127.662	122.137	9371.57	0.294751	0.124303	8.32862	1	0.7	133.342	1.49488	10.6045	121.243	81.1052	2.37124	0.294274	762.331
344	0.0206627	2.6648	0.0072172	0.299228	1.13866	1.13575	11.1844	4.80802	60.0613	23.5571	102.724	22.7922	220.557	44.1518	48.1941	72.2641	105.567	713.894	9106.95	0.527895	0.132289	10.8073	1	0.7	495.103	2.99191	78.3281	413.783	138.301	3.99047	0.684536	788.238
345	0.02	5.86	0.05	0.62	1.44	0.39	8.85	3.45	56.1	28.3	181	57.7	787	174	138	119	3154	838	23110	175	244	18.9	1	1	1304.78	6.55	70.23	1228	187.481	0.717213	0.0377299	809.263
346	0.34	5.73	0.14	0.97	0.7	0.04	4.18	2.06	34.4	18.4	118	38.6	521	123	110	53.2	2358	560	17313	127	118	16	1	1	867.56	7.18	41.38	819	114.067	1.07627	0.0225615	791.888
347	0.51	6.1	0.15	1.76	0.85	0.04	5.8	2.74	46.3	24.8	170	55.4	769	183	125	70.7	2862	828	21848	128	165	13.4	1	1	1266.45	8.52	55.73	1202.2	141.103	0.775758	0.024703	773.994
348	5	75.4	4.72	33.7	32.6	1.38	116	36.7	401	140	581	119	1075	175	132	498	890	4145	11418	41.1	10.1	6.07	1	1	2796.5	118.82	587.68	2090	17.5896	4.06931	0.559551	700.913
349	2.45	16.2	1.61	7.81	5.78	0.47	12.7	4.98	63.6	26.9	154	46.5	589	130	110	91.1	2555	777	16734	194	187	12	1	1	1062	28.07	87.53	946.4	33.7157	1.03743	0.0356556	763.16
350	0.02	5.86	0.05	0.62	9.26	0.076	54.1	21.8	303	125	580	126	1159	195	120	457	819	3664	11346	24.1	6.62	11.5	1	1	2579.79	6.55	388.236	2185	333.588	3.64048	0.557998	759.041
351	0.3	5.5	0.21	1.27	1.47	0.31	3.4	2.11	34	18	111	33.6	436	95.7	68.9	34.5	1660	568	15758	98.3	68	8.04	1	1	742.87	7.28	41.29	694.3	95.3709	1.44559	0.0207831	725.655
352	0.39	6.87	0.09	0.75	1.17	0.15	4.89	2.17	38.5	20.6	126	40.2	520	117	107	50.8	2720	567	19247	177	160	10.3	1	1	878.78	8.1	46.88	823.8	101.704	1.10625	0.0186765	748.526
353	0.01	38.9	0.06	3.14	8.02	0.2	52.9	21	266	103	468	100	944	157	89.3	285	937	2934	9881	61.2	13.8	11.1	1	1	2162.23	42.11	348.12	1772	42.0803	4.43478	0.304162	755.64
354	0.01	81.5	0.18	4.2	13.7	2.4	96.7	35.1	426	156	652	119	964	169	58.9	287	419	4257	6161	26.9	3.97	9.23	1	1	2719.79	85.89	573.9	2060	23.9842	6.77582	0.684964	738.271
355	0	0.25	0.01	0	0	0.11	0.11	0.21	6.52	4.47	31.9	9.53	120	29.4	6.92	1.44	185	174	17024	5.06	3.15	6.4	1	1	202.51	0.26	6.95	195.3	751.154	1.60635	0.00778378	705.479
356	0.02	5.86	0.05	0.62	1.44	0.39	8.85	3.45	79	30.2	162	43.7	547	145	33.9	106	317	940	21610	27.2	92.3	9.99	1	1	1027.58	6.55	93.13	927.9	141.664	0.294691	0.334385	745.648
357	0.02	5.86	0.05	0.62	20.5	3.17	120	40.9	472	171	696	129	1053	190	33.9	106	317	4627	6993	20.9	3.88	9.74	1	1	2902.12	6.55	656.57	2239	341.832	5.3866	0.334385	743.273
358	0.02	5.86	0.05	0.62	1.44	0.39	8.85	3.45	308	117	527	110	1002	193	33.9	106	317	3503	11040	38.8	8.34	14	1	1	2277.68	6.55	322.13	1949	297.557	4.65228	0.334385	778.358
359	0.02	5.86	0.05	0.62	1.44	0.39	8.85	3.45	40.8	16.7	123	46.3	712	221	33.9	106	317	670	32569	85.5	180	21.6	1	1	1180.48	6.55	54.93	1119	170.84	0.475	0.334385	823.605
360	0.02	5.86	0.05	0.62	26.4	5.53	39.4	13.9	139	49.1	298	99.6	1375	361	33.9	106	317	1588	33510	75.4	173	28.5	1	1	2413.48	6.55	224.23	2182.7	333.237	0.435838	0.334385	854.628
361	0.11	11.1	0.04	0.85	1.66	0.2	9.51	3.75	48.3	21	102	23.2	230	47.4	26.4	91.3	255	631	12508	4.28	1.97	6.07	1	1	499.12	12.1	63.42	423.6	35.0083	2.17259	0.358039	700.913
362	0.02	5.86	0.05	0.62	1.44	0.39	8.85	3.45	158	59.1	250	49.7	432	86.1	16.2	73.7	110	1669	8690	2.68	0.82	9.44	1	1	1055.58	6.55	172.13	876.9	133.878	3.26829	0.67	740.358
363	0	27.4	0.03	1.09	3.8	0.44	27.6	10.5	132	51.3	225	45.7	410	80.6	45	99.8	409	1440	10383	6.52	2	7.56	1	1	1015.46	28.52	174.34	812.6	28.4923	3.26	0.24401	720.129
364	0.98	73.3	0.42	3.46	5.43	0.75	31.2	12.4	174	68.7	320	70.4	656	114	47.4	290	297	2001	11414	11.5	3.21	4.69	1	0.5	1531.04	78.16	223.78	1229.1	15.7254	3.58255	0.976431	739.765
365	0.35	58.1	0.06	2.05	4.45	0.5	35.5	14.8	189	78	373	83.3	789	144	57.5	373	353	2362	11529	6.71	2.19	6.95	1	0.5	1772.11	60.56	244.25	1467.3	24.2289	3.06393	1.05666	777.641
366	0.27	100	0.32	3.73	8.25	1.56	45.5	17.3	221	87.3	409	87.7	813	161	64.2	485	380	2636	10681	11	2.74	8.06	1	0.5	1955.93	104.32	293.61	1558	14.9348	4.0146	1.27632	792.656
367	2.42	61.2	0.82	4.49	2.98	0.45	14.8	6.15	87.8	40.5	221	53.6	558	122	80.7	367	522	1378	12504	13.2	4.35	3.16	1	0.5	1176.21	68.93	112.18	995.1	14.4364	3.03448	0.703065	704.39
368	0.26	33.8	0.13	1.04	1.35	0.42	10.3	4.08	53.4	22.3	114	26.1	253	54	21.3	91.6	140	703	10717	4.16	1.52	3.62	1	0.5	574.18	35.23	69.55	469.4	13.3239	2.73684	0.654286	716.283
369	0.15	46.5	0.12	1.04	2.44	0.3	19.5	9.2	144	66.1	354	89.4	899	178	88.3	486	611	2249	13309	12.5	3.25	5.96	1	0.5	1809.75	47.81	175.44	1586.5	33.1834	3.84615	0.795417	762.51
370	0.01	52.5	0.29	6.08	10.5	2.82	54	15.8	189	68	294	63.2	577	100	13.8	131	81.2	1894	8930	1.33	0.52	4.51	1	0.5	1433.2	58.88	272.12	1102.2	18.7194	2.55769	1.6133	736.145
371	0.03	95.5	0.06	1.54	4.04	0.5	35.5	14.6	207	88.1	436	96.5	925	187	99.1	577	673	2701	11894	23	5.52	3.53	1	0.5	2091.37	97.13	261.64	1732.6	17.8379	4.16667	0.857355	714.058
372	0.01	29.7	0.02	0.57	1.53	0.32	12.5	5.01	65.5	27.8	137	30.7	300	62.1	17.3	86.4	123	823	10047	3.77	1.26	3.21	1	0.5	672.76	30.3	84.86	557.6	18.4026	2.99206	0.702439	705.75
373	0.06	69.8	0.1	0.95	2.83	0.56	20.2	8.2	109	47.3	234	53.3	526	111	65.3	439	456	1473	11367	9.51	3.02	5.4	1	0.5	1183.3	70.91	140.79	971.6	13.7019	3.14901	0.962719	753.022
374	0.1	54.1	0.09	1.22	3.12	0.51	20.8	8.25	119	52.7	272	64.1	636	135	55.9	411	484	1706	10755	8.68	2.27	5.32	1	0.5	1366.99	55.51	151.68	1159.8	20.8935	3.82379	0.849174	751.602
375	0.18	11.9	0.24	1.81	1.82	0.28	9.46	4.14	59	27.9	154	40.2	472	123	118	129	3202	962	12398	25	14.3	4.05	1	0.5	905.93	14.13	74.7	817.1	57.8273	1.74825	0.0402873	726.326
376	0.24	11.9	0.35	2.72	1.98	0.61	8.88	3.77	52.5	24.5	137	38.1	456	107	87.5	104	2577	864	14432	19.5	9.5	5.76	1	0.5	845.55	15.21	67.74	762.6	50.1381	2.05263	0.040357	759.209
377	0.26	9.19	0.19	1.3	0.76	0.24	5.03	2.67	43.4	20.2	113	31.5	384	86.8	93.4	84.4	2778	690	14393	21.9	16.8	5.7	1	0.5	698.54	10.94	52.1	635.5	58.0896	1.30357	0.0303816	758.2
378	0.26	6.88	0.12	0.92	0.88	0.23	4.97	2.86	50.3	25.4	145	41.6	522	125	128	63.8	3773	877	13945	24.8	10.8	3.58	1	0.5	926.42	8.18	59.24	859	105.012	2.2963	0.0169096	715.3
379	0.03	4.08	0.05	0.17	0.53	0.18	3.99	2.21	40.1	21.1	132	38.2	480	117	114	27.5	3399	771	13947	24.1	9.92	8.11	1	0.5	839.64	4.33	47.01	788.3	182.055	2.42944	0.00809061	793.292
380	0.01	3.19	0	0.32	0.12	0.13	3.3	2.01	38.8	20.8	127	37.4	459	110	94.9	22.5	2832	744	14512	20.5	8.93	8.4	1	0.5	802.08	3.52	44.36	754.2	214.261	2.29563	0.00794492	796.919
381	0.11	11.9	0.09	0.85	0.79	0.32	8.63	3.95	61.9	30.8	180	48.8	583	157	206	160	245	1086	14253	43.3	27.9	3.62	1	0.5	1088.14	12.95	75.59	999.6	77.1892	1.55197	0.653061	716.283
382	0.04	11.4	0.06	0.5	1.14	0.27	9.09	3.96	60.7	29	165	43.9	518	137	152	145	4359	1012	13305	26.9	24.2	3.74	1	0.5	980.06	12	75.16	892.9	74.4083	1.11157	0.0332645	719.18
383	0	14	0	0.3	1.4	0.29	10.8	5.09	79.4	37.2	206	52.8	610	153	188	204	5428	1269	13419	33.5	28.3	3.36	1	0.5	1170.28	14.3	96.98	1059	74.0559	1.18375	0.0375829	709.725
384	0.08	11.2	0.06	0.32	1.14	0.3	9.69	4.47	68.3	31.6	175	48.7	586	134	147	167	4522	1076	15081	30.8	28	8.57	1	0.5	1070.86	11.66	83.9	975.3	83.6449	1.1	0.0369306	798.999
385	0.02	15.6	0.11	1.23	1.61	0.23	8.32	3.77	58.3	29.3	171	49.6	626	167	209	271	245	1059	15389	24	13.6	6.27	1	0.5	1132.09	16.96	72.23	1042.9	61.4917	1.76471	1.10612	767.455
386	0.21	18.6	0.12	1.01	1.92	0.45	15.7	7.43	113	51.7	280	73.6	831	183	140	215	4306	1725	14631	27.1	16.3	6.23	1	0.5	1577.74	19.94	138.5	1419.3	71.1785	1.66258	0.0499303	766.828
387	0.09	14.9	0.1	1.15	1.53	0.47	11.5	4.77	67.5	31.1	176	45.7	572	161	176	316	5161	1139	14779	30.7	19.6	3.32	1	0.5	1087.81	16.24	85.77	985.8	60.702	1.56633	0.0612284	708.68
388	0.24	16.8	0.2	1.22	1.54	0.5	11.2	4.21	66.9	32.4	192	58.5	774	209	266	419	245	1213	17080	26.8	15.3	3.21	1	0.5	1368.71	18.46	84.35	1265.9	68.5753	1.75163	1.7102	705.75
389	0.04	13.1	0.01	0.16	0.83	0.25	12.1	5.54	85.6	41.1	239	66.6	801	186	221	210	245	1446	14397	46.6	28	4.41	1	0.5	1451.33	13.31	104.32	1333.7	100.203	1.66429	0.857143	734.083
390	0	15.1	0.04	0.09	1.45	0.27	13.9	6.35	96	45.4	253	69.7	830	187	206	246	245	1540	14725	43.4	34.9	7.7	1	0.5	1518.3	15.23	117.97	1385.1	90.9455	1.24355	1.00408	787.98
391	0	14.1	0.1	0.82	1.64	0.36	9.78	3.75	55.6	26.1	153	42.7	525	150	179	290	5268	967	14143	20.5	10.5	3.4	1	0.5	982.95	15.02	71.13	896.8	59.7071	1.95238	0.0550494	710.761
392	0.14	11.1	0.15	1.48	1.44	0.11	9.62	3.99	62.2	31.1	176	49.7	615	143	162	140	5091	1087	15212	46.9	30.5	5.18	1	0.5	1105.03	12.87	77.36	1014.8	78.85	1.5377	0.0274995	749.075
393	0.51	64.5	0.21	2.26	3.38	0.57	20.1	8.34	119	52.6	274	63.2	627	129	52.6	262	329	1699	10913	14.2	3.75	6.08	1	0.5	1364.67	67.48	151.39	1145.8	16.9798	3.78667	0.796353	764.449
394	0.01	50.8	0.04	1.06	3.26	0.51	18.7	7.44	102	41.1	201	43.4	407	82.6	35.1	192	215	1240	10748	7.64	2.23	14	1	0.5	958.92	51.91	131.91	775.1	14.9316	3.42601	0.893023	852.595
395	2.29	104	0.9	6.72	7.46	1	40.5	15.3	227	98.7	509	126	1252	233	122	816	811	3214	12645	20.5	4.57	7.45	1	0.5	2623.87	113.91	291.26	2218.7	19.4777	4.48578	1.00617	784.628
396	0.02	24.7	0.03	0.33	1.71	0.45	8.66	3.94	56.4	24	118	28	269	50	13.3	59.7	97.3	712	11411	4.38	1.86	7.41	1	0.5	585.24	25.08	71.16	489	19.4976	2.35484	0.613566	784.083
397	0.07	62.1	0.17	3.41	8.72	2.29	47.6	15.5	179	67	285	62.2	569	97.2	17.7	155	115	1864	9530	2.22	0.88	5.18	1	0.5	1399.26	65.75	253.11	1080.4	16.4319	2.52273	1.34783	749.075
398	1.42	61.9	0.61	5.1	6.03	1.14	35.2	13.4	176	70.8	330	75.4	690	124	42.8	280	302	2103	10777	8.17	2.3	12.1	1	0.5	1591	69.03	231.77	1290.2	18.6904	3.55217	0.927152	836.116
399	0.48	61.6	0.39	5	8.79	2.41	44.3	14.6	171	66.3	295	60.3	565	115	30.9	265	207	1898	8102	6	1.18	7.99	1	0.5	1410.17	67.47	241.1	1101.6	16.3273	5.08475	1.28019	791.76
400	1.48	57	0.6	4.33	3.22	0.8	17.2	7.16	101	42.1	207	51.2	500	90.7	50.8	284	433	1323	12963	11	3.96	3.36	1	0.5	1083.79	63.41	129.38	891	14.0514	2.77778	0.655889	709.725
401	0.05	35	0.01	0.32	1.71	0.2	11.9	5.08	71.9	30.9	161	39.3	400	74.8	30.9	154	270	979	12316	9.09	2.51	7.14	1	0.5	832.17	35.38	90.79	706	19.9548	3.62151	0.57037	780.343
402	0	55.4	0.45	7.36	12.5	3.19	56.9	17.5	199	71.6	299	62.8	575	101	13.3	139	110	1962	8782	1.69	0.58	4.09	1	0.5	1461.7	63.21	289.09	1109.4	17.551	2.91379	1.26364	727.215
403	0.07	54.5	0.02	1.74	5.7	0.85	36.9	14	182	70.9	316	69.9	615	105	32.8	247	330	2011	11495	4.7	1.72	9.37	1	0.5	1472.58	56.33	239.45	1176.8	20.8912	2.73256	0.748485	808.362
404	0.33	36.3	0.28	3.03	4.05	1.1	23.9	7.61	95.5	38.9	175	39.4	378	71.2	9.13	87.3	93.1	1091	8959	2.82	0.85	6.85	1	0.5	874.6	39.94	132.16	702.5	17.5889	3.31765	0.937701	776.196
405	0	0.67	0.01	0.16	0.28	0.23	4.44	3.03	43.3	16.4	59.2	10.9	84.5	11.5	16.7	3.06	481	567	14176	2.21	0.8	5.54	1	0.5	234.62	0.84	51.28	182.5	217.262	2.7625	0.00636175	755.467
406	0.07	1.68	0	0.34	0.12	0.18	2.04	1.2	18	8.43	44.4	11.6	118	23.3	27.6	10.3	794	301	14954	2.21	1.08	3.25	1	0.5	229.36	2.09	21.54	205.73	98.4354	2.0463	0.0129723	706.824
407	0.028	0.93	0.044	0.17	1.24	1.58	18	4.52	24.5	3.5	8.54	1.31	7.65	1.19	32.8	10.3	1060	111	13023	0.48	0.11	16.4	1	1	73.202	1.172	49.84	22.19	18.9334	4.36364	0.00971698	794.429
408	0.012	3.7	0.086	1.2	2.66	0.18	10.4	3.35	35.3	11.8	50.2	10.3	96.4	19.5	220	248	1078	357	11785	1.03	0.56	16.7	1	1	245.088	4.998	51.89	188.2	37.6551	1.83929	0.230056	796.301
409	0	3.38	0.14	2.61	6.87	0.1	13.5	2.52	17	3.37	8.22	1.32	7.98	1.29	170	115	198	105	13209	0.32	0.19	14.8	1	1	68.3	6.13	39.99	22.18	3.61827	1.68421	0.580808	783.947
410	0.057	3.96	0.44	6.17	12.6	0.21	24.5	4.06	23.9	5.17	15.2	2.53	21.1	3.3	261	141	562	152	12017	0.26	0.24	16.9	1	1	123.197	10.627	65.27	47.3	4.45093	1.08333	0.25089	797.535
411	0.37	3.76	0.34	2.71	3.33	0.54	19.4	5.18	42	11.8	46.4	10.1	89.1	17.2	476	68.7	1449	375	13170	1.45	1.58	20.2	1	1	252.23	7.18	70.45	174.6	24.3175	0.917722	0.047412	816.36
412	0.026	2.52	0.079	1.65	6.4	0.15	26.4	6.89	55	15.1	56.4	10.7	89.4	16.7	466	94	833	466	17962	0.54	0.21	11.1	1	1	287.415	4.275	94.84	188.3	44.0468	2.57143	0.112845	755.64
413	0.21	26	0.33	6.53	16.4	0.78	51.3	11	84.6	23.4	81	14.9	124	22.3	635	336	1079	691	24866	0.8	0.26	22.7	1	1	462.75	33.07	164.08	265.6	8.03145	3.07692	0.311399	829.038
414	0.59	5.44	0.35	4.86	9.05	0.39	40.2	11.5	103	28	106	19.9	166	30.5	802	212	1360	884	33949	1.27	0.53	25.2	1	1	525.78	11.24	164.14	350.4	31.1744	2.39623	0.155882	840.643
415	0.42	17.2	0.28	2.94	6.01	0.5	32.7	13.3	110	39.8	177	37.3	346	70.1	398	411	584	1238	25461	3.89	2.16	36.8	1	1	853.55	20.84	162.51	670.2	32.1593	1.80093	0.703767	884.829
416	0.03	52	0.12	2.01	4.17	0.85	23.4	8.34	105	43.7	217	51	520	106	74.9	624	576	1376	9180	17	6.25	34.2	1	1	1133.62	54.16	141.76	937.7	17.3135	2.72	1.08333	876.007
417	0.03	13	0.16	2.07	4.35	1.16	26.4	8.44	102	39.6	182	40.3	410	85.9	15.3	72.8	133	1147	8985	3.01	1.25	7.97	1	1	915.41	15.26	142.35	757.8	49.6592	2.408	0.547368	724.866
418	0.02	30.1	0.27	4.59	9.41	1.47	50	17.2	209	77.9	349	72.5	653	126	51.2	264	409	2300	11553	5.47	2.08	6.32	1	1	1600.46	34.98	287.08	1278.4	36.5466	2.62981	0.645477	704.39
419	0.01	25.1	0.04	0.87	2.75	0.5	24	10.9	155	69.5	363	85.4	875	178	100	386	775	2191	12081	24.4	7.84	10.9	1	1	1790.07	26.02	193.15	1570.9	60.3728	3.11224	0.498065	753.901
420	0.01	60.9	0.14	3.07	7.86	1.79	58.6	20.4	254	99	453	95.5	928	183	144	957	948	2964	9379	21.8	6.93	13.2	1	1	2165.27	64.12	342.65	1758.5	27.4251	3.14574	1.00949	772.505
421	0.01	13.6	0.03	0.46	1.38	0.35	12.5	5.73	81.2	35.2	185	43.7	460	97.5	35.7	106	258	1149	13122	8.24	3.35	23.3	1	1	936.66	14.1	101.16	821.4	58.2553	2.4597	0.410853	831.913
422	0.02	70.8	0.4	5.96	13.7	2.02	77.4	24.8	294	111	478	95	859	162	62.2	427	360	3159	9585	13.1	3.52	13.4	1	1	2194.1	77.18	411.92	1705	22.0912	3.72159	1.18611	773.994
423	0.06	24.3	0.05	0.93	2.37	0.33	17.2	7.25	97.9	42.8	212	48	490	100	71.2	295	460	1321	12041	10.6	4.2	9.14	1	1	1043.19	25.34	125.05	892.8	35.2328	2.52381	0.641304	737.365
424	0.06	16.4	0.1	1.46	3.74	0.71	26.6	10.3	132	53.9	261	57.8	559	114	44.4	182	280	1644	11685	5.71	2.33	7.72	1	1	1237.07	18.02	173.35	1045.7	58.03	2.45064	0.65	722.002
425	0.03	3.92	0.02	0.22	0.27	0.22	1.96	0.86	10.6	4.55	23.9	6.16	68.9	14.7	9.89	13.6	251	186	15947	2.67	2.14	13.6	1	1	136.31	4.19	13.91	118.21	28.2124	1.24766	0.0541833	775.466
426	0.13	42.6	0.27	3.78	7.54	1.16	37.8	12.7	153	60.8	285	62.8	619	131	56.5	380	589	1843	10337	11.5	3.95	19.9	1	1	1417.58	46.78	212.2	1158.6	24.767	2.91139	0.645161	814.756
427	0.02	54.4	0.07	1.87	4.58	0.77	34.6	11.5	146	59.4	274	61.1	585	124	41.2	263	375	1780	11704	20.2	6.28	21.3	1	1	1357.31	56.36	197.45	1103.5	19.5795	3.21656	0.701333	822.085
428	0.03	14.4	0.03	0.73	1.7	0.22	12.2	5.11	74.2	32	171	44.1	479	107	77.9	190	765	1058	16116	14.3	13.6	9.61	1	1	941.72	15.19	93.43	833.1	54.8453	1.05147	0.248366	742.019
429	0.04	20.5	0.04	0.79	2.03	0.48	17.6	7.53	107	45.7	231	53.9	520	111	66.5	263	611	1453	13223	16.6	6.35	9.68	1	1	1117.61	21.37	134.64	961.6	44.9977	2.61417	0.430442	742.696
430	1.73	22.6	0.65	4.82	4.62	1.17	23.4	8.5	105	42.4	199	42.4	401	82	24.3	105	204	1289	11852	3.88	2.01	23.2	1	1	939.29	29.8	142.69	766.8	25.7315	1.93035	0.514706	831.438
431	0.43	38.7	0.55	8.88	15	2.3	67.7	23.3	271	101	443	91.8	834	168	54.5	251	408	2926	9562	7.25	2.32	29.2	1	1	2065.66	48.56	379.3	1637.8	33.7273	3.125	0.615196	857.428
432	0.01	12.4	0.06	0.58	1.55	0.24	12.6	5.05	72.1	31.5	159	39.5	413	88	74.1	156	589	1022	15796	14.4	10.9	9.28	1	1	835.59	13.05	91.54	731	56.0153	1.3211	0.264856	738.771
433	0.34	59.3	0.33	6.29	11	1.25	54.9	19.5	240	94.5	443	96.3	927	184	97.3	536	633	2851	10143	11.9	3.93	13.5	1	1	2137.71	66.26	326.65	1744.8	26.3326	3.02799	0.846761	774.733
434	0.71	49.8	0.26	3.91	5.87	2.49	32.3	11.6	147	56	263	55.3	541	114	43.8	367	247	1727	8910	7.1	1.89	10.2	1	1	1283.24	54.68	199.26	1029.3	18.8241	3.75661	1.48583	747.605
435	0.9	60.3	0.55	6.32	11	1.5	59.1	19.8	237	92.2	428	89.5	846	167	59.2	383	356	2794	9104	7.68	2.67	16.3	1	1	2019.17	68.07	328.4	1622.7	23.8387	2.8764	1.07584	793.798
436	1.48	37.7	1.01	5.67	6.19	1.4	38.7	14.7	186	77.6	366	79.9	771	152	67.9	280	424	2364	11527	13.2	4.82	9.17	1	1	1739.35	45.86	246.99	1446.5	31.5416	2.73859	0.660377	737.668
437	0.09	31.6	0.07	1.29	3.75	0.52	30.1	11.9	161	69.1	331	76.2	715	149	69.4	279	448	2134	12015	13.2	5.01	10.9	1	1	1580.62	33.05	207.27	1340.3	40.5537	2.63473	0.622768	753.901
438	0.02	25.3	0.29	5.18	9.3	1.78	48.6	15.5	183	71.1	325	70.5	690	142	32.2	168	311	2112	8128	4.38	1.55	6.35	1	1	1587.57	30.79	258.18	1298.6	42.176	2.82581	0.540193	704.8
439	0.38	85.5	0.62	7.82	13.8	1.91	80.7	28.1	313	124	555	118	1073	211	82.3	678	708	3695	10617	11.9	5.08	8.68	1	1	2612.83	94.32	437.51	2081	22.0632	2.34252	0.957627	732.616
440	0.14	39.2	0.11	1.87	3.66	1.01	22.7	8.3	103	44.4	211	47.5	451	95.4	27.5	169	242	1393	9589	6.4	1.98	30.9	1	1	1029.29	41.32	138.67	849.3	20.5542	3.23232	0.698347	864.01
441	0.03	23.1	0.16	2.19	4.31	0.78	24.2	7.7	96.7	38	172	36.6	337	66.1	16.4	109	123	1145	8871	2.54	0.92	39.9	1	1	808.87	25.48	133.69	649.7	25.4984	2.76087	0.886179	894.726
442	0.26	23.3	0.2	1.5	2.67	0.83	20.7	8.36	112	47.8	230	53.7	523	108	72.7	302	581	1487	12917	17.4	6.3	9.52	1	1	1132.32	25.26	144.56	962.5	38.1037	2.7619	0.519793	741.142
443	0.02	44.1	0.13	2	5.26	1.04	33.9	11.7	156	61.5	286	62.4	576	116	48.2	302	299	1885	9172	6.76	2.22	16.8	1	1	1356.05	46.25	207.9	1101.9	23.8249	3.04505	1.01003	796.919
444	0.47	39.7	0.37	2.73	4.44	1	31.5	11.3	149	60.3	281	62.1	591	118	67.8	374	429	1814	11036	11.7	4.15	6.4	1	1	1352.91	43.27	197.24	1112.4	25.7083	2.81928	0.871795	705.479
445	0	22	0.04	0.92	2.64	0.37	15.4	6.05	78.6	31.7	153	34.9	341	70.1	38.5	180	244	1007	10016	4.36	2.05	6.23	1	1	756.72	22.96	103.06	630.7	27.4695	2.12683	0.737705	703.152
446	0.01	16.1	0.11	1.8	3.91	0.68	22.2	8.44	103	40	183	39.4	370	75.9	14.7	69.4	91.7	1207	8558	1.72	0.66	13.6	1	1	864.55	18.02	138.23	708.3	39.3063	2.60606	0.756816	775.466
447	1.2	36.1	0.73	5.69	6.12	1.47	30.3	11.4	151	63.5	306	69.4	682	140	89.6	356	582	1950	12182	17.8	4.99	18.8	1	1	1504.91	43.72	200.29	1260.9	28.8403	3.56713	0.611684	808.701
448	0	65.5	0.12	3.15	6.45	0.43	34.1	12.5	154	58.2	251	52.6	474	93.9	32.1	212	175	1652	11469	6.9	2.61	9.96	1	1	1205.95	68.77	207.48	929.7	13.519	2.64368	1.21143	745.366
449	0.03	57.5	0.69	11	16.1	4.98	64.6	18.4	207	75	324	61.1	537	105	9.16	67.7	72.2	2144	7374	4.82	0.86	8.54	1	1	1482.4	69.22	311.08	1102.1	15.9217	5.60465	0.937673	731.13
450	0.02	16.1	0.2	3.56	5.34	1.07	28.8	9.1	104	39.4	181	36.5	342	70.4	17.4	129	131	1178	8047	2.41	0.72	11.3	1	1	837.49	19.88	148.31	669.3	33.667	3.34722	0.984733	757.353
451	0.14	9.66	0.2	2.99	4	0.6	13.1	4.62	48.2	17.4	77.5	17.8	169	37.3	21.3	37	188	515	9707	2.04	0.69	24.7	1	1	402.51	12.99	70.52	319	24.5574	2.95652	0.196809	838.398
452	0.02	44.9	0.12	2.19	5.72	0.55	31.7	11.9	154	61.3	280	59.7	553	110	84.9	421	610	1818	9900	10.6	3.05	9.59	1	1	1315.1	47.23	203.87	1064	22.5281	3.47541	0.690164	741.825
453	0.19	26.9	0.18	2.35	3.19	0.45	21.8	7.39	96.6	38.3	187	39.3	366	71	32.3	136	243	1173	9504	6.7	2.07	8.08	1	1	860.65	29.62	129.43	701.6	23.6867	3.23671	0.559671	726.103
454	0.02	33.1	0.35	6.07	10.1	0.95	46.6	15.6	182	68.5	308	62.7	576	113	29.9	195	189	2036	8599	5.71	1.48	7.34	1	1	1422.99	39.54	255.25	1128.2	28.5331	3.85811	1.03175	717.5
455	0	25.9	0.16	4.08	9.08	0.47	49.1	16.9	209	76.2	330	66.8	587	115	27.9	137	187	2186	10219	4.59	1.45	6.64	1	1	1489.69	30.14	284.55	1175	38.9847	3.16552	0.73262	708.68
456	0.51	63.2	0.39	4.61	8.66	1.5	52.7	18.5	235	94	422	86.4	762	146	46	240	289	2712	9111	11.3	2.38	12.7	1	1	1895.47	68.71	316.36	1510.4	21.9822	4.7479	0.83045	768.698
457	0.03	28.1	0.15	2.25	4.95	1.43	23.8	7.95	98.2	39.2	179	39.8	389	80.1	10.1	55.2	62.8	1154	8148	2.81	0.78	7.28	1	1	893.96	30.53	136.33	727.1	23.8159	3.60256	0.878981	716.772
458	0	65.5	0.09	3.79	5.98	1.87	33.1	10.7	126	46.5	202	41.6	384	76	7.72	56.3	41.5	1354	7829	2.72	0.76	8.23	1	1	997.13	69.38	177.65	750.1	10.8115	3.57895	1.35663	727.767
459	0.07	79.3	0.71	13.8	18.7	5.04	76.9	22.5	251	90.8	387	74.1	647	124	10	93.5	46.9	2568	7600	2.18	0.63	12.7	1	1	1790.92	93.88	374.14	1322.9	14.0914	3.46032	1.9936	768.698
460	0.05	36.7	0.28	5.11	9.33	0.56	50.5	17.1	212	80.9	365	76.6	715	138	65.9	332	379	2401	8345	6.03	2.44	15.9	1	1	1707.13	42.14	289.49	1375.5	32.6412	2.47131	0.875989	791.245
461	0.02	52.3	0.23	5.41	9.17	1.53	48.3	16.2	193	74.3	336	67.7	611	118	32.5	195	185	2172	7727	5.5	1.53	8.52	1	1	1533.16	57.96	268.2	1207	20.8247	3.59477	1.05405	730.916
462	0	3.57	0	0.05	0.98	1.12	7.61	1.43	8.93	1.98	5.97	0.78	5.99	1	24	22.4	641	67.4	10669	0.24	0.06	6.15	1	1	39.41	3.62	20.07	15.72	4.34254	4	0.0349454	702.039
463	0	1.36	0	0.11	0.56	0.79	4.38	0.99	6.37	1.3	3.45	0.52	3.16	0.6	5.67	5.15	149	40.5	11039	0.11	0.04	11.3	1	1	23.59	1.47	13.09	9.03	6.14286	2.75	0.0345638	757.353
464	0.01	4.49	0	0.3	1.55	2.17	14.4	2.94	24	6.04	16.6	2.47	16.9	2.78	19.2	3.68	525	179	9654	0.16	0.04	9.3	1	1	94.65	4.8	45.06	44.79	9.33125	4	0.00700952	738.971
465	0.07	14	0.42	6.34	11.2	3.23	53	15.4	178	64.1	269	53.1	475	93	9.85	59.6	66.7	1809	7492	1.84	0.56	8.58	1	1	1235.86	20.83	260.83	954.2	45.8089	3.28571	0.893553	731.557
466	0.01	1.18	0.01	0.06	0.28	0.4	3.65	0.94	6.56	1.4	3.29	0.55	3.75	0.65	3	1.15	83.7	42.8	11121	0.12	0	16.2	1	1	22.73	1.26	11.83	9.64	7.65079	0	0.0137395	793.165
467	0.03	1.11	0.02	0.31	0.34	0.39	2.61	0.58	4.06	1.03	3.5	0.66	5.22	0.87	2.28	1.67	57.3	33.6	9811	0.05	0.03	16.8	1	1	20.73	1.47	7.98	11.28	7.67347	1.66667	0.0291449	796.919
468	0.01	1.35	0.01	0.17	0.45	0.57	4.44	1.25	8.73	1.85	5.29	0.85	7.49	1.28	3.09	0.78	78.6	58.8	10126	0.22	0.02	6.94	1	1	33.74	1.54	15.44	16.76	10.8831	11	0.00992366	712.549
469	0.08	19.6	0.04	0.48	0.5	0.23	3.55	1.65	27	15.7	115	39.2	524	148	130	200	1765	604	12987	20.5	14.7	24.3	1	1	895.03	20.2	32.93	841.9	41.6782	1.39456	0.113314	836.576
470	0.05	21	0.09	1.68	2.82	1.35	17.9	5.9	72.9	28.6	133	28.6	273	56.5	8.52	32.6	87.7	858	9123	1.9	0.64	15.6	1	1	643.39	22.82	100.87	519.7	22.7739	2.96875	0.371722	789.296
471	0.15	25.6	0.11	0.91	0.91	0.3	4.61	1.84	25.8	12.5	78.9	23.6	315	88.3	84.5	150	964	460	12795	11.9	6.77	17.7	1	1	578.53	26.77	33.46	518.3	19.3612	1.75775	0.155602	802.353
472	0.01	32.1	0.06	0.91	2.22	0.71	14.1	4.78	61.8	26.6	137	32.9	359	88.7	44	299	361	863	11711	3.61	0.86	7.47	1	1	760.89	33.08	83.61	644.2	19.474	4.19767	0.828255	719.061
473	0.1	34.3	0.2	1.94	3.25	0.5	16.8	5.96	75	30.5	144	31.4	291	59.1	18.9	94.6	135	910	9735	4.05	1.46	25.4	1	1	694.05	36.54	101.51	556	15.2162	2.77397	0.700741	841.531
474	0.01	85.5	0.2	1.21	3.35	0.69	23.5	9	117	49	238	52.4	496	99.5	36.7	300	246	1547	9033	9.27	2.44	6.99	1	1	1175.36	86.92	153.54	934.9	10.7559	3.79918	1.21951	713.181
475	0.16	77.2	0.21	2.72	6.12	1.08	32.9	12.3	155	64.2	306	66.9	629	124	37.5	249	225	2015	9233	8.42	2.02	13.3	1	1	1477.79	80.29	207.4	1190.1	14.8225	4.16832	1.10667	773.252
476	0.01	18.7	0.02	0.17	0.53	0.18	4.71	2.13	32.1	15.3	85.8	23.3	268	67.7	53	103	427	504	12813	6.98	4.25	10.2	1	1	518.65	18.9	39.65	460.1	24.3439	1.64235	0.241218	747.605
477	0.01	143	0.1	1.77	4.07	0.7	26.1	10.1	138	61.2	324	75.7	756	160	83.1	729	454	2133	9340	17.7	3.42	30.4	1	1	1700.75	144.88	178.97	1376.9	9.50373	5.17544	1.60573	862.105
478	0.03	80.3	0.24	4.78	8.79	4.41	45.4	14	160	60.1	267	54.4	501	100	16.9	129	88.8	1759	7456	3.05	0.71	8.99	1	1	1300.45	85.35	232.6	982.5	11.5114	4.29577	1.4527	735.838
479	0.03	29.6	0.08	1.28	3.94	0.1	28.9	11.6	154	60.9	282	58.5	525	101	59.8	208	395	1810	12275	18.6	4.92	12.6	1	1	1256.93	30.99	198.54	1027.4	33.1526	3.78049	0.526582	767.923
480	0.062227	30.6014	0.199927	1.7023	6.4011	1.91984	37.494	12.613	191.852	75.4117	413.14	87.5341	1088.4	186.053	54.2121	106.162	138.954	2854.9	28047.7	2.80102	1.47675	12.0392	1	0.5	2133.38	32.5659	250.28	1850.54	56.8245	1.89674	0.764006	835.555
481	0.617216	116.04	0.706728	8.36549	17.9253	2.57035	116.029	41.734	40.8	214.952	1117.03	210.544	2397.06	358.796	646.594	1397.5	1194.59	7831.37	32535.9	29.001	9.98545	11.3832	1	0.5	4643.17	125.73	219.059	4298.38	34.1874	2.90433	1.16986	829.359
482	0.0601245	91.3922	0.0445332	2.80782	8.17993	2.28028	65.3481	25.5997	394.715	148.936	799.503	158.365	1932.61	307.42	283.126	606.092	735.875	5663.9	32568.5	22.1892	6.60479	3.78061	1	0.5	3937.27	94.3047	496.123	3346.84	35.4896	3.35957	0.823635	720.144
483	0.053371	33.7074	0.0659741	1.16167	3.20779	0.595543	22.3273	7.33594	112.589	40.9985	235.344	48.0554	577.535	96.3227	108.125	235.937	377.893	1638.31	35878.2	6.31072	2.35967	12.3991	1	0.5	1179.3	34.9884	146.056	998.255	28.531	2.67441	0.624349	838.841
484	0.260376	129.558	1.9361	31.9048	50.5928	11.195	231.686	68.3427	40.8	291.545	1410.59	257.779	2878.62	436.275	328.788	796.11	577.628	516.63	29008.3	12.5001	3.31648	15.1643	1	0.5	5841.09	163.659	402.617	5274.82	32.2305	3.76908	1.37824	861.83
485	0.175881	165.537	0.673813	13.4021	24.5865	4.03378	127.088	41.941	589.805	196.932	1014.76	194.568	2245.15	344.388	442.413	1165	1045.67	7437.13	31453	20.3565	7.15261	19.5696	1	0.5	4963.04	179.789	787.454	3995.8	22.225	2.84602	1.11413	892.355
486	0.164373	77.3157	0.512872	8.40161	12.8328	3.97903	87.6156	26.8917	409.755	147.434	818.467	158.977	1836.42	294.703	147.468	365.247	333.814	5626.88	29767.4	9.28792	3.15074	3.20188	1	0.5	3883.47	86.3946	541.075	3256	37.6875	2.94785	1.09416	705.53
487	1.14748	76.1031	0.375912	5.09003	9.05736	1.71498	59.0674	23.8454	366.946	147.575	851.134	175.368	2164.71	347.095	653.588	1260.67	1952.84	5774.87	37032.2	36.4331	11.5105	10.8415	1	0.5	4229.23	82.7165	460.631	3685.88	44.5604	3.16521	0.64556	824.022
488	0.093264	64.0747	0.910196	14.5087	26.4271	4.34733	133.96	41.3766	584.317	202.214	999.965	185.469	2101.58	326.968	223.589	538.972	538.671	7189.63	29218.9	8.74907	2.86746	7.97744	1	0.5	4686.21	79.5868	790.427	3816.19	47.9501	3.05115	1.00056	791.599
489	2.35336	105.647	1.95032	12.9548	14.279	3.4318	75.7281	27.2639	400.448	151.986	802.726	159.561	1945.61	318.235	354.493	778.219	939.146	5715.6	32381.9	26.0112	8.28098	13.6493	1	0.5	4022.18	122.905	521.15	3378.12	27.4856	3.14108	0.828646	849.694
490	0	57.6102	0.0400278	1.63991	3.55379	1.21798	37.8749	13.5512	209.547	81.6677	437.18	89.6826	1101.09	177.674	168.433	462.166	756.354	3070.87	35698.9	15.7552	6.11278	10.0615	1	0.5	2212.33	59.2901	265.745	1887.29	31.8315	2.57742	0.611045	815.95
491	0.0807683	32.9362	0.0239428	0.703748	1.82397	0.828933	9.58477	3.88469	69.677	28.8564	167.536	40.3657	548.869	103.684	144.215	327.806	1433.98	1163.96	43581.9	12.0675	6.41046	4.11272	1	0.5	1008.85	33.7446	85.7993	889.31	26.3541	1.88247	0.228599	727.717
492	0.0486347	27.7764	0.0240271	1.20074	4.32534	0.769285	18.7065	7.68769	112.947	45.3121	246.007	52.0689	638.118	107.683	87.6066	244.696	699.98	1712.94	36601.8	9.06087	5.26952	15.0405	1	0.5	1262.67	29.0498	144.435	1089.19	37.4938	1.71949	0.349575	860.876
493	0.163912	73.8453	0.199791	4.69758	11.2524	1.50473	54.6773	20.5878	314.66	118.162	646.269	126.35	1561.65	249.216	192.297	441.499	497.877	4519.68	33258.3	10.8747	4.07751	18.3864	1	0.5	3183.23	78.9066	402.682	2701.65	34.2385	2.66701	0.886763	884.739
494	0	29.4039	0.0692471	2.30353	2.86564	1.5633	24.8536	9.72453	136.952	51.3128	267.267	54.8926	679.548	116.522	66.527	184.542	298.983	1892.73	29399.4	5.68325	1.98542	11.3281	1	0.5	1377.28	31.7767	175.959	1169.54	36.805	2.8625	0.617234	828.825
495	0.0662678	38.8553	0	3.46564	6.96054	1.6975	40.0715	14.9978	217.545	86.9206	475.946	98.4186	1225.48	206.709	71.5298	161.762	324.674	3250.17	29847	7.82587	2.74211	12.4813	1	0.5	2417.13	42.3872	281.272	2093.47	49.3892	2.85396	0.498228	839.581
496	0	33.5893	0.0315778	0.0429026	1.96265	0.735968	10.2783	2.81279	42.0304	16.0839	81.0816	17.3578	240.242	49.0021	40.3983	123.774	333.867	610.631	34762.9	2.91241	0.916388	3.89396	1	0.5	495.251	33.6638	57.8201	403.767	11.9941	3.17814	0.370728	722.788
497	0.0534003	26.2067	0.0395394	0.232846	2.27431	0.432113	15.3085	6.44097	116.702	47.5198	280.152	62.4438	833.729	140.073	149.532	249.5	642.436	1892.73	39984.7	13.1254	8.29759	3.09155	1	0.5	1531.61	26.5324	141.158	1363.92	51.4056	1.58183	0.388366	702.501
498	0	69.1688	0.127443	2.62767	8.09982	1.2088	49.8267	19.8229	289.913	110.803	610.31	121.731	1483.75	237.884	446.433	1289.36	1429.08	4309.04	34331.3	26.7208	9.23023	12.0919	1	0.5	3005.27	71.924	368.871	2564.47	35.6554	2.89492	0.902231	836.042
499	0.0363113	52.2742	0.0537613	1.62477	5.87099	0.679815	39.1347	16.82	282.698	117.502	671.626	141.714	1789.48	290.3	220.406	456.952	835.408	4531.68	35042.6	32.622	9.31697	7.00464	1	0.5	3409.82	53.989	345.204	3010.62	55.7636	3.50136	0.546981	778.424
500	0.0361053	73.4055	0.0890908	1.82897	5.83674	1.25955	41.1614	16.2965	247.106	94.0272	514.741	103.547	1287.42	202.482	354.53	868.266	1198.13	3602.26	36988.9	28.2397	8.33397	5.24595	1	0.5	2589.24	75.3596	311.66	2202.22	29.2228	3.38851	0.724683	750.272
501	0.0352102	126.293	0.256632	4.14601	11.5261	3.16009	80.709	29.9513	447.854	162.035	859.486	167.753	2023.97	317.269	595.624	1633.54	1323	6237.13	34045.6	31.5662	9.97057	3.52233	1	0.5	4234.44	130.731	573.2	3530.51	27.0059	3.16594	1.23472	713.867
502	0	48.4863	0.0472999	1.16187	7.05929	0.692414	44.6377	19.7697	321.135	132.512	761.408	158.929	1943.9	317.374	473.801	1067.51	2346.09	5180.57	41377.7	63.7583	26.3521	14.9914	1	0.5	3757.12	49.6955	393.294	3314.13	66.6887	2.41947	0.455017	860.496
503	0.0168974	8.57541	0	0	0.260452	0.0433993	0.9455	0.533194	11.2148	4.89946	34.92	8.4749	129.747	28.5243	11.1796	12.7933	181.65	252.978	37918.8	3.62395	1.13004	3.92133	1	0.5	228.156	8.5923	12.9974	206.566	24.0408	3.20691	0.0704279	723.417
504	0.00583234	0.223926	0.0223384	0	0.31251	0	0.296208	0.306055	3.79399	1.21427	5.91215	1.11699	10.264	1.52799	3.49277	0.238886	27.0197	45.9943	12766.1	3.06	1.32	3.77393	1	0.5	24.9962	0.252097	4.70876	20.0354	79.4749	2.31818	0.00884119	719.986
505	0	0	0	0	0	0.0474382	0	0.466638	5.94358	2.75623	11.4701	1.99656	19.052	3.22565	0.822659	0.220136	26.1286	86.1376	12871.3	1.77	0.84	4.52104	1	0.5	44.9583	0	6.45766	38.5006	0	2.10714	0.00842508	736.371
506	0	0.0841806	0	0	0	0.0595461	1.51441	0.962288	15.1957	4.55045	18.8432	4.30216	36.2969	5.77546	0.687951	0.393761	32.1551	171.105	12577.6	1.88	1.77	7.09377	1	0.5	87.5843	0.0841806	17.732	69.7682	828.791	1.06215	0.0122457	779.691
507	0	0.0408573	0	0	0	0	0.10809	0.186143	2.46281	1.36598	6.96878	2.00572	15.1262	2.03446	0.16169	0.209554	12.4894	60.5785	13157.6	1.07	1.04	3.44295	1	0.5	30.299	0.0408573	2.75704	27.5011	673.101	1.02885	0.0167785	711.862
508	0	0.344429	0	0	0	0.222572	1.99783	0.493816	4.81853	1.33328	5.02539	1.08862	6.96777	1.24097	2.99714	1.98548	100.484	46.7199	13394.9	2.75	0.65	3.03024	1	0.5	23.5332	0.344429	7.53275	15.656	45.455	4.23077	0.0197591	700.778
509	0.0140235	0.341741	0	0.411111	0.33	0.17267	1.29156	0.34374	5.2493	1.33363	5.70336	1.12099	9.83617	1.20647	3.29017	1.20302	80.8027	51.96	13220.1	1.87	2.01	4.11393	1	0.5	27.3548	0.766876	7.38727	19.2006	25.0375	0.930348	0.0148883	727.744
510	0	55.0371	0.0815084	1.61477	5.68625	1.32238	44.469	16.5686	251.191	98.9691	501.675	103.912	1214.48	204.668	347.568	719.122	1076.89	3530.68	34623.3	20.6601	8.34704	4.6849	1	0.5	2499.67	56.7334	319.237	2123.7	37.4331	2.47515	0.667777	739.664
511	0	4.46042	0	0	0.10538	0.138888	5.11604	2.65634	47.6575	17.2686	103.964	21.8264	302.914	54.2262	72.195	93.8991	1000.73	692.977	46514.9	7.42031	6.78097	3.9856	1	0.5	560.334	4.46042	55.6742	500.199	112.142	1.09428	0.0938309	724.88
512	0.0968318	20.8846	0.103076	1.28256	1.72385	0.371356	19.2958	6.90168	104.143	39.0705	205.516	42.2751	502.141	83.3692	93.6855	150.179	437.138	1464.66	35498.3	10.1074	3.61113	3.89909	1	0.5	1027.17	22.367	132.436	872.372	39.0025	2.79895	0.343551	722.906
513	0.0543595	11.4141	0.0433903	0.516407	2.43859	0.435275	14.2177	6.09945	83.8477	35.8003	176.531	39.3381	394.39	84.5895	59.6664	112.747	574.857	1101.12	12872	4.16407	2.0186	3.99519	1	0.5	849.715	12.0283	107.039	730.648	60.7441	2.06285	0.19613	725.096
514	0.00824366	43.1606	0.136596	2.1778	5.27775	1.22129	27.7933	9.96711	121.683	48.1627	223.037	48.6155	453.076	90.0291	49.4269	72.5924	230.898	1473.2	10839.8	5.57965	2.15351	5.02481	1	0.5	1074.35	45.4833	165.943	862.921	18.9723	2.59096	0.314391	746.207
515	0.249945	28.0863	0.153557	1.45221	3.73899	0.553802	24.6294	9.94632	131.755	53.4905	255.284	57.7785	545.288	103.802	188.06	380.132	391.585	1647.37	12981.6	13.8291	5.1403	3.65016	1	0.5	1216.21	29.942	170.623	1015.64	33.9204	2.69033	0.970752	717.019
516	0.428508	48.9729	0.295414	3.44476	6.28789	1.25948	37.1284	12.8658	157.957	63.7792	288.947	62.3603	589.295	122.295	169.343	306.116	431.144	1900.99	11175.9	8.83017	4.73274	7.86231	1	0.5	1395.32	53.1416	215.499	1126.68	21.2014	1.86576	0.710009	790.11
517	0	31.9607	0.0337861	0.876698	3.26471	0.536935	28.4066	11.5144	152.516	62.2772	296.315	67.8297	654.706	120.731	113.92	180.074	282.849	1890.2	13126.3	14.8946	5.97925	5.60193	1	0.5	1430.97	32.8712	196.239	1201.86	36.5627	2.49106	0.636644	756.532
518	0	10.0061	0.0802813	1.96102	4.35264	0.27782	25.6045	8.83726	108.437	43.7608	199.657	42.6343	394.544	82.0011	192.872	358.546	374.844	1291.28	15021.3	2.96977	2.9458	6.19078	1	0.5	922.154	12.0474	147.509	762.597	63.2998	1.00814	0.956522	766.21
519	0.0205511	32.5114	0.0650708	1.43348	3.67266	0.630562	28.1124	10.9636	147.956	61.4875	299.765	67.1573	649.046	135.157	130.678	232.468	253.857	1906.72	12750.2	12.6137	4.87102	7.29971	1	0.5	1437.98	34.0304	191.335	1212.61	35.6331	2.58953	0.915741	782.569
520	0	14.2079	0.0415202	0.454685	1.71326	0.331855	13.1043	5.13841	68.1986	29.7281	147.259	33.9812	327.911	70.204	39.2294	70.5357	65.0437	916.719	13237.2	6.61587	2.78098	4.07768	1	0.5	712.273	14.7041	88.4864	609.082	41.4226	2.37897	1.08444	726.942
521	0.112943	26.1856	0.0977148	1.05953	3.14382	0.624155	27.2063	11.5792	162.191	68.4267	331.136	75.0352	694.437	135.936	85.5796	161.049	113.287	2091.52	14173.4	27.6678	8.99852	13.0992	1	0.5	1537.17	27.4558	204.744	1304.97	47.5299	3.0747	1.4216	845.02
522	0.0105	0.340219	0	0	0.42	0.0998671	0.995203	0.88001	12.587	5.19812	22.9309	4.2777	58.6102	12.9223	3.61892	1.10953	113.255	211.749	39948	1.73261	1.84503	5.31307	1	0.5	119.272	0.350719	14.9821	103.939	296.361	0.939069	0.00979672	751.478
523	0.0282248	0.739378	0.0626203	0	0.428475	0.225552	2.88587	1.42206	16.1692	4.92199	19.4347	3.01852	29.9231	4.37203	7.12823	1.87696	268.987	211.383	40101.9	2.41583	2.55941	7.34391	1	0.5	83.6317	0.830223	21.1311	61.6704	74.2817	0.943899	0.0069779	783.178
524	0	0	0	0.116764	0.410114	0.108241	3.15005	1.12842	13.2671	4.48358	16.3611	2.8044	25.1641	4.22896	5.17318	6.40734	209.434	163.004	38553.3	1.1013	0.68237	9.9629	1	0.5	71.2228	0.116764	18.0639	53.0421	454.268	1.61393	0.0305936	814.894
525	0.0225	0.693854	0	0	0.804122	0.424706	8.21064	3.80041	47.3175	11.5753	44.8745	7.37749	75.2581	9.20013	4.17801	2.04146	172.982	492.739	38490	0.600171	0.683533	9.78328	1	0.5	209.559	0.716354	60.5573	148.286	207	0.878042	0.0118016	812.949
526	0	0.108545	0	0	0	0.052919	0.220567	0.317852	3.1291	1.23084	4.69088	0.828875	9.49518	1.43237	1.99943	0.150802	33.7274	41.0188	14594.1	1.65	0.95	4.88467	1	0.5	21.5071	0.108545	3.72044	17.6781	162.865	1.73684	0.0044712	743.555
527	0	0.191826	0	0	0	0.201433	0.479746	0.613294	8.08227	2.56964	9.47901	2.02547	17.8562	2.88554	2.07861	0.310433	58.7549	95.148	13217.7	3.17	1.05	6.64032	1	0.5	44.3844	0.191826	9.37675	34.8158	181.497	3.01905	0.00528353	773.107
528	0	0.257228	0	0	0	0.182412	1.0137	0.388766	7.56512	1.96981	5.9461	1.28746	11.1371	1.8722	1.68494	0.371294	67.0205	64.723	13604.4	0.95	1.74	6.31397	1	0.5	31.6199	0.257228	9.15001	22.2127	86.3541	0.545977	0.00554	768.14
529	0.00467887	0.220447	0	0	0.35	0.107477	1.99092	0.763537	6.17849	1.78554	5.61364	0.859013	7.32075	1.1584	2.07667	0.393776	74.5535	58.7248	13307.7	1.04	0.75	6.61371	1	0.5	26.3529	0.225126	9.39042	16.7373	74.3465	1.38667	0.00528179	772.71
530	0.007462	0.136569	0.0253949	0	0.411966	0.0332907	1.11004	0.438612	4.97588	1.23059	3.80767	0.566495	5.55845	0.677317	1.17714	0.36592	68.8239	47.1159	13461.6	1.08	0.91	3.07288	1	0.5	18.9797	0.169426	6.96979	11.8405	69.8861	1.18681	0.00531676	701.979
531	0.0046	0.201997	0	0	0.27082	0.131308	0.45607	0.419773	4.04377	1.33613	5.70695	0.820965	9.24394	1.46693	1.31754	0.293997	48.5103	56.7293	14044.5	2.24	0.73	3.03002	1	0.5	24.1033	0.206597	5.32175	18.5749	89.9091	3.06849	0.00606051	700.772
532	0.024	0.25111	0	0	0.384765	0.209873	1.03672	0.722899	6.0516	1.91768	4.21406	0.793619	7.08961	1.11831	2.88648	0.740461	104.403	51.8084	15221.1	1.39	2.02	3.22865	1	0.5	23.8143	0.27511	8.40586	15.1333	55.0081	0.688119	0.00709231	706.252
533	0.0094	0.321721	0	0	0.258803	0.596035	3.57382	1.03327	14.5819	4.58635	13.9576	3.17865	20.4822	3.68135	1.53744	0.510823	88.998	139.34	12832.6	2.11	1.14	4.34336	1	0.5	66.2611	0.331121	20.0438	45.8862	138.578	1.85088	0.00573972	732.687
534	0.1055	0.647211	0	0	0.464851	0.0901546	1.24883	1.11792	11.5131	3.24831	10.8013	2.11813	14.9965	2.19452	2.67104	0.614741	169.973	109.626	12984.2	3.25	2.16	6.24111	1	0.5	48.5463	0.752711	14.4348	33.3588	44.3182	1.50463	0.0036167	767.002
535	0	0.373522	0	0	0.250388	0.121404	2.10836	0.905604	9.97024	2.82373	9.40762	1.43202	13.4631	1.94073	1.78301	0.611607	98.4372	93.4315	13452.3	4.01	1.67	9.80524	1	0.5	42.7967	0.373522	13.356	29.0672	77.8193	2.4012	0.00621317	813.189
536	0.0087	0.112657	0	0	0.181247	0.0439392	0.732557	0.510803	2.81462	0.967229	3.41742	0.679723	4.48941	0.686439	1.8974	0.1431	46.2425	36.7612	14535.2	1.08	0.88	4.05579	1	0.5	14.6447	0.121357	4.28316	10.2402	84.3808	1.22727	0.00309455	726.455
537	0	0.0297621	0	0	0	0.0580398	1.45145	0.96711	10.4864	2.19367	9.95769	1.3019	13.5961	1.85565	1.74311	0.673398	61.0678	93.2739	13741.9	0.74	0.69	10.7147	1	0.5	41.8977	0.0297621	12.963	28.905	971.202	1.07246	0.0110271	822.743
538	0	0.127397	0	0	0	0.0709832	0.788954	0.591391	5.18826	1.37092	4.46534	0.549043	3.80318	0.954196	1.53069	0.166158	58.4059	45.9987	14163.7	1.62	0.81	3.27604	1	0.5	17.9097	0.127397	6.63959	11.1427	87.4639	2	0.00284488	707.518
539	0	0	0	0	0	0.0288037	1.60072	0.602728	8.89438	2.65586	8.8622	2.28364	18.1606	3.07671	0.615653	0.433859	41.218	92.7221	13865.2	1.09	1.05	9.3055	1	0.5	46.1656	0	11.1266	35.039	0	1.0381	0.010526	807.632
540	0.0054	0.0915589	0	0	0.245511	0.0892772	0.744196	0.48433	6.35421	2.163	7.28392	1.69182	14.9062	2.70296	1.04982	0.387669	53.6035	75.0202	13701.7	2.91	1.22	6.86713	1	0.5	36.7624	0.0969589	7.91752	28.7479	296.496	2.38525	0.00723215	776.445
541	0	0.230802	0	0	0.773592	0.0750145	1.66752	0.537771	4.86684	1.26183	4.89054	0.870336	8.13188	1.40358	1.4545	0.839808	72.5646	46.5942	13714.1	3.55	1.64	5.19314	1	0.5	24.7097	0.230802	7.92074	16.5582	71.7419	2.16463	0.0115732	749.314
542	0.038	28.0973	0.0201197	2.07681	3.61475	1.39028	28.4381	9.29693	137.229	59.1133	294.538	66.9135	700.674	132.042	93.2977	154.602	191.679	1806.98	9111.98	15.75	4.08	6.26545	1	0.5	1463.48	30.2322	179.969	1253.28	41.4551	3.86029	0.806568	767.384
543	0.04	40.0986	0.242634	2.78315	4.12897	1.40034	31.2211	10.5356	144.589	59.1704	275.265	66.7532	651.727	112.903	185.71	312.745	284.171	1758.53	9267.36	6.25	11.25	3.28508	1	0.5	1400.86	43.1644	191.875	1165.82	27.0088	0.555556	1.10055	707.758
544	0.00460768	17.1474	0.171834	2.60541	4.41023	1.17173	26.3528	9.40882	121.54	47.979	231.247	54.3426	518.122	91.6374	52.9242	86.1532	105.393	1445.14	8506.3	31.52	8.34	4.45916	1	0.5	1126.14	19.9293	162.884	943.328	47.3338	3.77938	0.817448	735.101
545	0.029	33.93	0.0816188	1.85635	4.32058	0.871953	28.7822	11.0253	140.712	55.3929	249.441	58.1392	575.5	93.7328	301.391	481.72	414.44	1626.03	11196.9	14.83	9.36	6.35421	1	0.5	1253.82	35.8969	185.712	1032.21	28.7547	1.5844	1.16234	768.763
546	0.0418875	42.536	0.130175	2.50011	6.12524	1.05205	33.9365	11.8604	166.52	65.1299	297.386	70.7182	695.644	114.643	234.271	408.99	414.499	1942.05	11182	21.14	1.67	14.6386	1	0.5	1508.22	45.2082	219.494	1243.52	27.5065	12.6587	0.986708	857.733
547	0.028169	74.3793	0.131311	1.59281	4.86807	0.583679	29.3763	12.7546	178.205	74.9381	382.11	91.7859	911.479	162.558	436.965	794.589	640.821	2403.36	13208.3	22.67	9.66	6.81519	1	0.5	1924.79	76.1316	225.788	1622.87	21.3167	2.34679	1.23995	775.688
548	0.035	24.5312	0.357864	6.25084	7.62342	1.87413	35.1803	12.4903	157.638	59.1248	275.398	66.4668	646.493	111.107	82.4722	148.25	164.691	1831.42	9224.96	8.09	10.08	12.2585	1	0.5	1404.57	31.1749	214.806	1158.59	37.1642	0.802579	0.900172	837.567
549	0.04	5.65901	0	0.148459	1.15181	0.207723	5.08377	2.16578	33.0151	13.9935	63.6147	16.2842	150.446	27.1461	117.459	149.243	297.866	427.718	12120.6	9.08	7.66	6.35229	1	0.5	318.956	5.84747	41.6242	271.485	46.4277	1.18538	0.501042	768.734
550	0.021	12.7432	0.0295346	0.940426	1.70558	0.375944	10.4789	3.55689	48.937	21.2217	95.7824	24.7151	255.796	43.9449	56.2307	84.9922	131.508	625.414	12319.5	9.54	8.54	4.59868	1	0.5	520.248	13.7341	65.0542	441.46	32.1433	1.1171	0.64629	737.943
551	0.0191933	15.3109	0.0596469	1.08527	2.04115	0.180768	38.6552	14.8074	198.054	79.7874	347.835	74.4591	672.869	111.437	96.9259	169.868	385.713	2156.16	13066.3	16.88	9.77	6.19143	1	0.5	1556.6	16.475	253.738	1286.39	78.0812	1.72774	0.440399	766.221
552	0	0.0373944	0	0.1255	0.1126	0.022224	0.211523	0.150186	3.68154	2.25836	17.4051	4.7752	53.2726	11.3648	2.06806	0.362814	37.0514	93.5542	11100	1.28	1.45	3.80597	1	0.5	93.417	0.162894	4.17807	89.076	546.833	0.882759	0.00979219	720.741
553	0	0.0300103	0	0.1377	0.375	0	0.254628	0.361589	5.53981	3.27761	14.5753	3.88401	28.6106	4.25354	0.968071	0.418043	25.6389	116.137	12357.9	0.75	1.22	8.01787	1	0.5	61.2998	0.16771	6.53103	54.6011	325.568	0.614754	0.0163051	792.117
554	0.0094	0.106276	0	0.12	0.13	0.0236856	0.676303	0.256101	6.10844	2.44062	8.84028	2.2536	21.1641	2.82431	1.83117	0.160195	33.9515	83.1676	12503.9	4.88	0.51	3.04221	1	0.5	44.9531	0.235676	7.19453	37.5229	159.214	9.56863	0.00471835	701.117
555	0.00652143	0.744113	0	0.1459	0.23	0	0.584592	0.498091	4.78679	2.67744	11.8727	2.83148	25.5073	5.56943	4.07714	1.05717	92.9656	98.5201	12884.2	2.04	0.55	7.88911	1	0.5	55.4544	0.896535	6.09947	48.4583	54.0507	3.70909	0.0113716	790.458
556	0.0056	0.0890304	0	0.17	0.28	0.039684	0.629496	0.840294	17.7051	7.95252	37.9415	8.3985	76.3281	12.8993	0.907662	0.0925505	28.9425	302.602	13716.4	1.06	0.74	5.09706	1	0.5	163.279	0.26463	19.4946	143.52	542.341	1.43243	0.00319773	747.551
557	0.0081	0.0994774	0	0.1124	0.268223	0	0.401929	0.650662	11.1612	5.84752	29.2685	6.16868	60.9528	11.0686	0.460449	0.30137	27.9818	204.82	13469.7	1.33	1.33	5.42396	1	0.5	126.008	0.219977	12.482	113.306	515.081	1	0.0107702	753.444
558	1.33099	69.323	0.809511	10.5911	13.0915	3.64619	75.1142	24.9488	348.742	134.281	697.025	142.064	1620.79	267.789	84.5683	186.202	178.971	4666.03	29566.5	8.76089	2.55023	14.464	1	0.5	3409.54	82.0546	465.543	2861.95	34.8785	3.43533	1.0404	856.347
559	0	37.0791	0.219339	6.5386	11.807	3.4919	86.005	29.9668	430.067	157.734	826.677	166.511	1881.75	318.958	194.163	356.542	427.074	5616.98	23448	4.50971	2.13189	11.7671	1	0.5	3956.81	43.8371	561.338	3351.63	76.4565	2.11536	0.834848	833.019
560	0.045161	72.5958	0.3591	8.61293	13.9009	3.6462	81.6469	25.45	377.052	137.129	702.05	144.294	1637.09	275.154	176.2	281.482	333.387	4845.1	26503.1	9.29602	2.95216	14.4087	1	0.5	3479.02	81.613	501.696	2895.71	35.481	3.14889	0.844311	855.904
561	0	64.8004	0.328912	6.89039	14.7728	4.20256	90.4343	28.9339	422.028	154.826	786.828	159.515	1814.43	305.353	260.097	472.292	522.996	5474.24	27103.9	4.18584	2.21165	7.65654	1	0.5	3853.35	72.0197	560.371	3220.96	44.7232	1.89263	0.90305	787.404
562	2.5151	163.401	0.821752	6.72854	13.1386	2.17337	88.1324	29.4385	430.9	163.542	851.87	178.474	2137	356.698	34.03	52.41	1653.15	5940.03	30948.3	14.7243	8.31781	17.1102	1	0.5	4424.83	173.466	563.783	3687.58	21.2582	1.77021	0.0317031	876.079
563	0.0863526	88.3101	0.770241	11.2371	25.4959	5.71444	164.68	54.5047	40.8	273.649	1322.89	256.753	2835.31	463.283	428.784	830.739	736.485	516.63	23505.7	6.29144	3.05759	12.9555	1	0.5	5543.48	100.404	291.195	5151.88	51.3116	2.05765	1.12798	843.774
564	0.0613797	81.8228	0.836966	13.7911	24.8516	5.1826	124.673	41.4947	563.048	199.539	994.589	189.02	2060.64	334.108	158.178	293.184	244.245	6790.27	23648.9	9.87931	2.6585	13.3357	1	0.5	4633.66	96.5122	759.25	3777.9	39.1443	3.71612	1.20037	847.049
565	0.0415246	82.5672	0.530641	10.8845	21.9265	4.67539	121.024	41.2181	560.179	203.845	1027.05	194.261	2101.49	338.012	471.548	1045.14	547.976	7146.65	24792.3	10.405	2.83313	20.4503	1	0.5	4707.71	94.0239	749.022	3864.66	41.103	3.67263	1.90728	897.79
566	0.0697145	88.8134	0.179973	4.46364	7.49657	1.89268	54.5683	20.6241	299.548	113.5	615.032	128.933	1493.51	256.594	306.68	673.339	772.793	4096.12	32205.3	19.701	7.23374	16.7191	1	0.5	3085.23	93.5268	384.13	2607.57	27.8805	2.72349	0.871306	873.322
567	0.0925576	59.8543	0.332293	6.47348	14.1417	2.82156	75.9618	24.9766	354.131	129.252	671.914	133.503	1519.78	259.171	117.604	216.055	261.519	4633	28149.1	8.83823	3.07893	14.1785	1	0.5	3252.4	66.7527	472.033	2713.62	40.6518	2.87056	0.826154	854.05
568	0.0364509	26.4384	0.0539857	1.96403	4.93619	1.6648	27.1428	9.46403	126.114	47.191	246.848	45.7503	515.006	80.6513	164.288	389.98	515.591	1692.99	34819.8	3.15818	1.86946	9.24599	1	0.5	1133.26	28.4929	169.321	935.447	32.8309	1.68936	0.756375	806.954
569	0.0509835	76.4516	1.22904	18.7665	36.5311	8.97902	214.519	63.3525	40.8	296.009	1411.91	266.995	2908.49	467.325	378.761	855.867	909.443	516.63	22212.6	9.12559	2.77247	14.7834	1	0.5	5811.41	96.4981	364.182	5350.73	55.449	3.2915	0.941089	858.873
570	0	71.6487	0.153367	3.70648	9.59862	1.90475	52.357	17.6473	256.682	95.4301	517.915	104.237	1256.01	210.732	300.639	667.325	640.152	3581.56	27163.4	13.9892	5.22015	12.7778	1	0.5	2598.02	75.5086	338.19	2184.32	28.9282	2.67984	1.04245	842.218
571	0.0136894	90.8493	0.223755	6.81904	15.548	2.30234	102.499	35.9804	506.02	179.782	900.811	169.4	1822.17	289.701	178.517	385.903	450.359	6214.68	34717.1	6.28128	2.19339	7.14678	1	0.5	4122.11	97.9058	662.35	3361.86	34.3377	2.86373	0.85688	780.438
572	0.0841899	126.321	1.87914	22.9151	54.8803	10.9198	296.805	91.9664	40.8	404.27	80.1	350.505	3725.86	41.89	602.304	1248.73	1029.76	516.63	24250.5	10.5244	3.58329	13.4642	1	0.5	5249.2	151.199	495.372	4602.63	30.4409	2.93708	1.21265	848.138
573	0.116156	104.924	1.15282	18.412	40.8487	10.0637	230.736	73.1971	40.8	323.052	80.1	298.45	3145.86	494.834	494.302	1131	1170.12	516.63	20926	12.2107	3.66925	17.4356	1	0.5	4862.54	124.605	395.646	4342.29	34.8484	3.32784	0.96657	878.334
574	0.0404658	68.5823	0.421992	3.94722	9.20207	2.09882	63.749	21.2634	317.359	122.875	650.967	134.124	1593.46	264.868	417.799	781.054	911.484	4501.21	35318.3	6.39909	4.47756	8.80589	1	0.5	3252.96	72.992	413.672	2766.29	37.8986	1.42915	0.856903	801.831
575	0	218.761	0.957264	10.0519	15.3393	7.40582	123.889	41.6397	592.506	234.216	1244.82	270.821	3229.08	41.89	34.03	52.41	2051.59	516.63	21901.7	16.2083	6.33977	18.2057	1	0.5	6031.38	229.77	780.78	5020.83	21.8515	2.55661	0.025546	883.543
576	0	86.1076	0.234998	4.93115	10.0564	2.36845	65.9255	23.3275	369.2	144.024	775.142	162.233	1943.03	334.128	417.912	980.784	1606.07	5227.43	36114.8	14.087	7.61875	8.67453	1	0.5	3920.71	91.2738	470.878	3358.56	36.7966	1.84899	0.610672	800.261
577	0.0300713	25.5793	0.0450108	0.943456	3.74657	0.64969	22.7987	9.06136	145.546	57.3533	313.313	68.361	823.981	142.046	131.032	284.966	697.586	2126.97	32508.8	8.34471	3.74624	5.22585	1	0.5	1613.45	26.5978	181.802	1405.05	52.8259	2.22749	0.408503	749.909
578	0	14.5144	0	0.635363	1.49128	0.0638163	12.9062	5.38836	85.367	37.4689	226.648	53.2558	719.752	125.837	153.411	223.088	824.745	1464.37	46581.8	5.77729	7.11882	6.22294	1	0.5	1283.33	15.1498	105.217	1162.96	76.7644	0.811551	0.270493	766.717
579	0.0277411	1.93576	0	0	0	0.260317	1.98623	1.19678	18.6198	7.65533	40.7523	8.27344	93.186	17.8317	13.4408	10.8962	416.423	332.672	40657.4	3.07436	1.33536	6.42948	1	0.5	191.725	1.9635	22.0631	167.699	85.4079	2.30227	0.0261661	769.921
580	0.0181533	0.932641	0	0.407812	0.547517	0.121704	1.62513	1.1748	13.7098	6.06477	26.9201	6.17865	62.4215	10.9065	15.8325	2.88697	519.726	258.223	38175.7	3.97068	1.77234	3.15572	1	0.5	131.029	1.35861	17.1789	112.492	82.7992	2.24035	0.00555478	704.273
581	0.034837	3.21466	0.0387329	0.312795	0.698517	0.28091	2.8943	1.13905	18.0412	6.906	34.5537	6.68203	84.6415	14.5212	29.0507	14.4647	829.608	327.653	41385.1	3.18531	1.48235	5.55523	1	0.5	173.959	3.60102	23.054	147.304	40.9063	2.14883	0.0174356	755.73
582	0	2.07303	0.0317768	0	0.106122	0.20086	3.26028	1.25725	19.2735	6.95104	34.3365	6.47999	80.4702	14.2717	10.4738	11.0221	288.05	310.438	37236.3	2.26802	1.34528	3.70447	1	0.5	168.712	2.10481	24.098	142.509	67.7067	1.6859	0.0382644	718.331
583	0	5.91688	0.0343685	0	1.03182	0.248188	4.87298	1.43204	22.3359	7.81407	35.4789	7.02104	66.6939	13.9227	30.0115	25.6169	491.401	312.878	40271.4	1.70013	0.868011	4.67158	1	0.5	166.803	5.95125	29.9209	130.931	22.0005	1.95866	0.0521304	739.4
584	0.0608419	72.5146	0.209753	4.7618	9.03391	2.94446	56.9926	21.4858	328.036	129.04	702.476	152.639	1801.79	320.859	164.545	337.878	438.575	4779.07	29232.2	11.8236	4.78599	14.1338	1	0.5	3602.85	77.547	418.493	3106.81	40.0635	2.47045	0.7704	853.687
585	0	28.2858	0.0562334	0.541354	3.5553	0.78784	20.3089	7.73902	100.31	34.0295	152.504	30.441	325.839	51.0833	131.648	191.23	440.707	1177.48	32073.2	5.39922	2.30025	8.63894	1	0.5	755.481	28.8834	132.701	593.897	20.5619	2.34723	0.433915	799.833
586	0.0317265	22.5598	0.304807	3.04323	8.25571	2.53268	37.9584	11.9135	158.87	60.2565	304.092	65.4629	724.32	130.04	39.0376	71.4157	175.494	2078.18	23658.8	2.70258	1.04839	19.9158	1	0.5	1529.64	25.9395	219.53	1284.17	49.5063	2.57783	0.40694	894.514
587	0	0.679804	0	0.143881	0.252229	0.275449	3.13409	1.62791	22.0897	7.15293	25.7552	4.49498	46.1051	7.64189	4.5593	0.657135	145.856	265.019	37657.9	0.814674	0.680636	6.26234	1	0.5	119.353	0.823685	27.3794	91.1502	110.661	1.19693	0.00450537	767.335
588	0.0179363	1.19343	0.0132389	0	0.449045	0.294033	4.89658	2.14659	33.732	9.68461	42.2726	7.34307	75.3152	11.4339	5.11417	0.917992	224.37	385.522	32992.5	1.24102	0.680622	5.73028	1	0.5	188.792	1.2246	41.5183	146.049	119.263	1.82336	0.00409142	758.71
589	0	0.795327	0	0.0784738	0.183507	0.250249	5.41804	1.76366	24.8812	6.8211	26.3743	4.25566	42.0027	7.35071	4.64972	0.861135	181.25	274.71	35768.2	1.13487	1.09909	10.2293	1	0.5	120.175	0.873801	32.4967	86.8045	99.3413	1.03255	0.0047511	817.728
590	0	1.39279	0	0.108456	0.76097	0.864491	7.02646	2.9809	29.9005	7.64671	27.8623	4.77645	44.5733	5.9919	11.281	1.33904	186.826	298.717	35838.5	0.861574	0.298565	4.9934	1	0.5	133.885	1.50124	41.5333	90.8507	60.517	2.88572	0.00716732	745.618
591	0	0.823976	0.017027	0.0986087	0.115435	0.156998	5.44154	2.03596	25.419	7.67551	32.5684	5.62535	60.6395	8.73906	13.4794	0.625315	188.168	337.233	33774.2	1.0671	1.01397	10.1205	1	0.5	149.356	0.939612	33.1689	115.248	122.655	1.0524	0.00332318	816.578
592	0.0212267	0.579265	0	0	0.318712	0.431877	5.47346	1.68028	24.1574	6.76448	29.8318	5.49853	51.2768	8.64297	4.40877	0.490893	193.347	284.355	34532.8	0.830472	0.456458	3.37113	1	0.5	134.677	0.600492	32.0618	102.015	169.885	1.81938	0.00253892	710.014
593	0.0244889	0.99649	0.0180987	0.313145	0.367629	0.231856	1.98952	1.0294	13.657	3.77216	13.6756	2.18533	25.3622	4.97876	4.77862	0.699461	186.5	126.568	32885.8	0.840722	0.696959	5.69739	1	0.5	68.6016	1.35222	17.2754	49.974	36.9569	1.20627	0.00375046	758.156
594	0	0.576498	0	0	0.146192	0.201098	3.62399	1.44249	17.6523	5.07856	21.6941	3.95247	38.0707	5.53814	3.06014	1.00986	132.889	212.395	36346.5	0.656738	0.423166	3.36374	1	0.5	97.9765	0.576498	23.0661	74.3339	128.941	1.55196	0.00759926	709.823
595	0	0.509864	0	0.0605843	0	0.0960875	1.60343	0.854787	13.8057	4.72964	17.319	3.24305	35.5621	5.1597	2.88994	0.446149	120.382	171.734	37382.6	0.697823	0.469397	8.83658	1	0.5	82.9439	0.570448	16.3601	66.0134	115.722	1.48664	0.0037061	802.195
596	0	1.28983	0	0.0745897	0.350427	0.449459	5.44791	2.0934	22.3746	5.70504	22.6228	3.92671	36.3676	5.66786	6.52337	1.02378	215.313	232.293	34022.8	0.945551	0.631161	3.06129	1	0.5	106.37	1.36442	30.7158	74.2901	54.4482	1.49811	0.00475482	701.654
597	0	0.438373	0	0	0	0.143697	1.19911	0.601539	7.63562	2.57962	10.9753	1.57522	18.3794	2.94553	3.51824	0.256585	82.5009	109.537	33293.6	0.48987	0.459015	7.44586	1	0.5	46.4735	0.438373	9.57996	36.4551	83.1602	1.06722	0.00311009	784.572
598	0	1.31083	0	0.0611853	0.287667	0.581604	3.75428	2.06959	22.8302	7.19223	32.0683	5.28592	52.0097	8.41508	7.26758	0.954814	212.039	304.824	35301	1.11347	1.16587	5.56124	1	0.5	135.867	1.37201	29.5233	104.971	76.5089	0.955049	0.00450301	755.833
599	0	0.919305	0	0	0.592518	0.532245	4.53182	2.28071	23.1368	6.22171	22.2135	3.90459	39.5167	6.09168	4.41748	0.986434	188.991	251.92	33862.2	0.923114	0.360101	5.72917	1	0.5	109.942	0.919305	31.0741	77.9482	84.7903	2.56349	0.00521949	758.691
600	0.0145536	1.48297	0	0.123854	0.509674	0.529596	6.22237	2.30118	26.0597	6.39308	21.9141	3.30395	35.5444	4.5971	7.62808	0.937086	256.22	265.535	34793	0.752095	0.560338	7.65674	1	0.5	108.996	1.62138	35.6225	71.7526	44.254	1.34222	0.00365734	787.406
601	0	0.413681	0	0.080477	0.189269	0.34485	2.9389	1.10003	14.9947	5.10575	22.2888	3.92505	41.626	6.14302	4.23606	0.434478	114.575	205.911	35453	0.803994	0.512827	7.56489	1	0.5	99.1506	0.494158	19.5677	79.0887	160.047	1.56777	0.00379207	786.18
602	0	1.19904	0.0189309	0	0.0794008	0.620381	5.64056	2.27858	23.6274	5.15394	22.2225	3.10255	36.068	5.25947	7.25268	0.893189	281.519	238.803	32965.7	0.965498	0.500382	8.69984	1	0.5	105.271	1.21797	32.2463	71.8065	58.956	1.92952	0.00317275	800.565
603	0	0.539124	0	0.0786904	0.555451	0.273965	2.82847	1.28881	18.1076	5.91021	23.8569	4.12669	39.0101	5.98276	5.02915	0.546427	133.596	241.17	35774.6	0.752459	0.749052	6.83253	1	0.5	102.559	0.617814	23.0543	78.8867	127.687	1.00455	0.00409015	775.941
604	0.224417	95.5787	0.320024	6.49848	11.6463	2.5177	67.221	23.974	323.838	121.319	607.528	127.803	1429.07	246.07	405.151	803.423	725.579	4258.39	30693.4	19.8539	6.50955	9.1833	1	0.5	3063.61	102.622	429.197	2531.79	24.6711	3.04996	1.10729	806.236
605	0.876043	193.304	0.949025	13.0322	22.0269	5.38782	140.77	46.6965	40.8	212.507	1016.09	199.705	2074.32	339.002	534.204	1106.67	636.215	7166.2	30530.5	25.4772	6.83289	11.1671	1	0.5	4305.46	208.161	255.681	3841.62	18.4551	3.72861	1.73946	827.255
606	0.0887517	60.1347	1.10314	17.6959	29.9042	6.74333	190.647	62.7753	40.8	264.862	1230.54	233.751	2371.03	374.413	229.29	452.266	363.422	516.63	25926.6	8.09573	2.65307	7.5852	1	0.5	4884.5	79.0225	330.87	4474.6	56.6244	3.05145	1.24447	786.452
607	0	2.95937	0	0.226056	0.703893	0.374411	4.00178	1.87224	26.5466	7.77297	33.0544	6.15498	63.4041	10.3162	14.7334	9.22817	456.135	304.013	39461.6	1.59733	1.87488	7.1677	1	0.5	157.387	3.18543	33.4989	120.703	37.8921	0.851962	0.0202312	780.732
608	0	2.77293	0	0.0679032	0.158585	0.35849	5.41168	2.92142	38.8794	13.1969	54.3816	9.37444	92.4178	15.0439	14.7625	8.26846	558.603	505.159	40394.5	1.53697	2.50289	4.20297	1	0.5	234.985	2.84083	47.7296	184.415	64.9158	0.614076	0.014802	729.689
609	0.0171084	0.508855	0.0126161	0.220671	0.25771	0.205596	4.363	1.57712	22.4932	5.70469	20.582	3.71505	34.3365	5.77202	7.64892	1.20577	272.921	250.437	36560.6	2.06614	1.30021	3.86979	1	0.5	99.7662	0.759251	28.8967	70.1102	92.3413	1.58908	0.00441803	722.229
610	0	3.37805	0	0	1.08464	0.519147	4.65772	1.74587	23.5909	5.52826	21.2897	3.44171	35.6729	6.16814	15.7232	8.84035	445.62	221.044	36912	0.931963	0.982877	6.58606	1	0.5	107.077	3.37805	31.5983	72.1007	21.3439	0.948199	0.0198383	772.295
611	0	1.34322	0	0.0752324	0.263684	0.420598	3.62891	1.68017	25.3235	7.32754	24.23	4.41531	39.6341	5.41857	10.8552	2.82234	336.976	275.401	36221.8	2.59147	1.68937	7.77293	1	0.5	113.761	1.41845	31.3168	81.0255	57.1224	1.53398	0.0083755	788.941
612	0	1.7112	0	0.148875	0.434895	0.832341	7.1142	3.33643	44.2409	12.2343	48.7269	8.62189	88.7108	12.7156	16.2177	2.1577	366.808	500.629	38737.4	2.33036	1.14344	5.23322	1	0.5	228.828	1.86007	55.9588	171.009	91.937	2.03803	0.00588236	750.042
613	0	3.09049	0	0	0.265255	0.246774	4.20083	1.88487	31.5227	10.5391	44.703	9.57191	103.337	18.8005	20.5318	9.13532	655.466	388.729	42251.7	2.34751	1.96812	8.21362	1	0.5	228.163	3.09049	38.1205	186.952	60.4927	1.19277	0.0139371	794.6
614	0	0.305621	0	0	0.160035	0.10633	1.55127	0.734681	12.2235	3.83701	16.2621	3.15709	33.4998	6.00555	7.66356	0.767324	163.811	162.774	33881.6	3.26716	2.06414	7.79039	1	0.5	77.843	0.305621	14.7758	62.7616	205.357	1.58282	0.00468422	789.17
615	0	4.07131	0.0114628	0.467684	0.780992	0.705635	6.54577	2.51476	25.9503	6.88185	24.5588	4.9381	44.2479	6.83442	13.8513	15.6495	549.213	274.286	37429.4	1.15307	1.12794	5.75232	1	0.5	128.509	4.55045	36.4975	87.4611	19.2203	1.02228	0.0284943	759.08
616	0	0.886202	0.0243276	0.0708954	0.497285	0.506528	5.04931	2.82518	44.8173	14.2511	56.2941	10.3291	100.415	15.0713	15.2736	1.39875	271.486	573.327	37483.6	2.346	1.7584	7.33941	1	0.5	251.037	0.981425	53.6956	196.36	200.077	1.33417	0.00515221	783.116
617	0	1.5608	0	0.0735986	0.258187	0.182912	3.04544	1.49396	16.5552	5.67448	25.977	5.49473	65.5536	14.068	12.9003	3.56126	311.049	238.89	37599.2	1.95018	1.24306	6.86256	1	0.5	139.938	1.6344	21.5356	116.768	71.4438	1.56885	0.0114492	776.378
618	0	1.07579	0	0.126819	0.148302	0.17729	3.47808	1.79091	19.9959	5.21545	19.8792	3.58929	33.5709	4.62038	5.67766	2.05943	223.485	219.31	37197.7	2.10062	1.95741	7.16971	1	0.5	93.6684	1.20261	25.5905	66.8753	55.6086	1.07316	0.00921508	780.76
619	0	1.36258	0	0	0.0903555	0.192023	3.75983	1.62536	19.2932	4.96216	17.7432	2.9121	29.6914	4.02745	15.0218	1.96549	255.784	213.028	38441.2	2.33742	1.61113	6.40569	1	0.5	85.6596	1.36258	24.9608	59.3363	43.547	1.45079	0.00768419	769.557
620	0	0.748235	0	0	0	0.123961	1.98475	1.33849	17.9081	5.62086	22.8396	3.77452	42.6632	6.15034	15.8754	1.43055	309.143	211.195	40279.4	2.62214	1.96182	8.27277	1	0.5	103.152	0.748235	21.3553	81.0485	108.32	1.33659	0.00462747	795.34
621	0	4.21261	0	0.0631096	0.44289	0.607808	6.47743	3.11078	47.2978	16.5867	78.8026	16.3564	194.982	34.3628	26.2817	19.7041	969.418	630.642	37066.9	1.05522	0.867695	7.19769	1	0.5	403.303	4.27572	57.9367	341.091	79.7738	1.21612	0.0203257	781.152
622	0.0241468	1.60813	0	0.102901	0.361139	0.223793	6.30527	2.16565	24.4467	6.0477	25.0276	4.39642	40.3503	6.73383	9.78807	2.53931	291.2	243.245	37184.4	1.60308	1.01938	4.35099	1	0.5	117.794	1.73518	33.5026	82.5558	47.5777	1.5726	0.00872016	732.848
623	0	2.21986	0	0.238624	0.465331	0.444848	5.87292	2.52908	32.6304	8.15693	33.524	5.73728	64.3014	9.08416	9.65195	3.18607	349.423	343.564	38120.5	2.13531	1.23318	6.94462	1	0.5	165.205	2.45849	41.9425	120.804	49.1375	1.73155	0.00911809	777.564
624	0	17.8748	0.0152743	0.179125	2.287	0.374582	17.4108	6.67498	106.2	41.7292	222.663	47.6584	569.654	101.901	127.362	252.888	832.381	1496.84	41694.6	15.958	13.833	11.8936	1	0.5	1134.62	18.0692	132.948	983.605	54.4354	1.15362	0.303813	834.204
625	0	80.2609	0.0882905	2.65263	8.63722	1.43595	67.7183	26.936	413.784	163.624	847.967	184.496	2095.66	365.097	649.089	1325.85	1903.93	5613.02	34896.4	40.0596	15.7865	11.5063	1	0.5	4258.36	83.0018	518.511	3656.84	44.0574	2.53759	0.696376	830.543
626	0.060701	105.523	1.05848	13.6095	28.5948	4.23109	147.189	50.0402	40.8	237.452	1127.63	230.217	2522.11	426.749	300.134	632.711	686.314	7872.3	29326	11.7465	5.23429	11.3545	1	0.5	4935.26	120.252	270.855	4544.16	37.7886	2.24415	0.921897	829.081
627	0	64.0463	0.171068	4.05944	7.38743	3.10064	48.761	14.9034	228.409	86.2757	443.594	93.0933	1074.15	193.741	164.235	368.502	348.165	3022.15	27257.6	5.77053	2.67675	13.4203	1	0.5	2261.7	68.2768	302.561	1890.86	27.694	2.1558	1.05841	847.767
628	0	73.9251	0.238086	5.11249	10.1055	2.96598	53.0301	17.8285	252.891	95.2437	496.862	102.539	1166.7	206.784	261.726	556.995	455.754	3379.65	27560.2	6.93903	3.26534	8.70341	1	0.5	2484.22	79.2757	336.821	2068.13	26.0878	2.12505	1.22214	800.608
629	0	64.5985	0.161857	2.58969	6.31864	1.50511	35.9394	14.9154	208.067	78.991	432.59	92.3863	1000.58	183.012	208.453	391.933	379.779	2912.23	34920.8	10.5075	4.12259	5.88977	1	0.5	2121.66	67.35	266.746	1787.56	26.5414	2.54877	1.032	761.361
630	0	60.5046	0.203685	3.33226	6.82748	2.01164	43.0068	14.4452	207.416	75.876	390.647	85.5864	966.906	175.073	126.137	258.539	308.937	2704.65	28548.1	5.69556	3.32121	15.8636	1	0.5	2031.84	64.0405	273.707	1694.09	26.4534	1.71491	0.836865	867.11
631	0	0.0937357	0	0	0	0	0.323174	0.230055	7.48115	4.66314	33.314	9.96621	155.805	32.2086	4.47174	0.322638	70.9979	207.96	41722	3.72261	5.08536	3.70118	1	0.5	244.085	0.0937357	8.03438	235.957	2517.26	0.732026	0.00454433	718.252
632	0.0179522	0.137421	0.0132227	0	0	0.0996942	0.744823	0.483241	10.5293	6.78238	54.0463	15.908	269.737	59.2095	2.28988	0.615405	103.583	304.026	42448.2	5.16503	7.06164	3.17247	1	0.5	417.709	0.168596	11.857	405.683	2406.24	0.73142	0.00594121	704.731
633	0	0.0593258	0	0	0	0	0.499714	0.528773	13.2802	9.02481	72.0077	22.1837	329.953	68.72	8.81122	0.297108	79.5433	400.082	42354.8	3.2951	4.44732	9.59794	1	0.5	516.257	0.0593258	14.3087	501.889	8459.89	0.740917	0.00373518	810.912
634	0	0.295448	0.014205	0	0	0.0267206	0.266265	0.35408	8.45276	5.96596	46.072	15.4285	269.218	63.4096	7.9685	0.611662	144.572	260.883	46752.4	14.0911	25.1037	9.40498	1	0.5	409.503	0.309653	9.09983	400.094	1292.07	0.561315	0.00423083	808.757
635	0	0.0775276	0	0	0	0.0560633	0.558698	0.305168	8.86765	5.37264	40.4441	12.1763	186.472	38.0591	2.17918	0.340032	73.9415	254.332	40950	2.61478	3.40445	5.38761	1	0.5	292.389	0.0775276	9.78758	282.524	3644.18	0.768049	0.00459866	752.804
636	0.0162602	0.140224	0	0	0	0.0900382	0.523481	0.650115	13.4774	7.26145	55.1759	17.5708	276.322	58.7698	3.68726	1.11583	138.823	327.946	42598.9	6.30836	9.00398	6.50367	1	0.5	429.998	0.156484	14.741	415.1	2652.67	0.70062	0.0080378	771.052
637	0	0.050193	0	0	0	0.024159	0.321073	0.240246	6.71961	3.6283	31.1276	9.37901	148.703	28.953	1.50063	0.208919	58.615	179.454	41860.2	2.34217	3.04312	4.65859	1	0.5	229.146	0.050193	7.30508	221.791	4418.76	0.76966	0.00356426	739.142
638	0	0.148611	0	0	0	0.0268094	0.356321	0.495194	10.1892	5.7749	53.3907	15.9079	240.773	49.7536	5.70703	0.27823	120.227	300.942	40303.3	5.3182	8.66418	9.48811	1	0.5	376.816	0.148611	11.0676	365.6	2460.11	0.613814	0.0023142	809.689
639	0.0291377	0.0279341	0	0	0	0	0.401674	0.477153	14.9718	7.94312	59.1004	17.004	222.921	41.6031	2.86202	0.203945	62.7065	361.883	40150.4	2.89911	3.0968	6.48893	1	0.5	364.479	0.0570718	15.8507	348.571	6107.59	0.936164	0.00325237	770.828
640	0	0.153376	0	0	0	0	0.931352	0.522378	11.7991	7.47595	56.1226	18.2494	259.55	54.2855	6.28236	0.431991	82.8398	341.894	44245.2	3.45762	4.11242	8.74803	1	0.5	409.09	0.153376	13.2528	395.684	2579.82	0.840774	0.00521478	801.142
641	0.0128904	0.30943	0	0	0	0.0177678	0.766569	0.83435	19.3187	10.3798	91.0982	31.2513	530.821	125.068	7.45572	0.895079	185.41	486.659	44739	10.0625	12.775	8.66871	1	0.5	809.877	0.32232	20.9374	788.617	2446.69	0.78767	0.00482756	800.192
642	0	0.106699	0.0102394	0	0.0695761	0	0.954473	0.526533	15.2392	8.85272	72.779	21.4148	320.945	64.2743	11.8623	0.338806	94.654	401.392	44925.9	3.50921	3.8397	6.85403	1	0.5	505.172	0.116939	16.7898	488.265	4175.39	0.913928	0.00357941	776.254
643	0	0.492823	0	0.0580223	0.202844	0.0743117	0.803245	0.73184	18.7804	8.2465	53.3493	14.3376	186.664	35.5348	8.07904	1.09232	262.894	375.422	45336.2	11.3813	22.1767	4.24819	1	0.5	319.276	0.550846	20.5927	298.132	541.226	0.513209	0.004155	730.663
644	0	0.100909	0.0129036	0.0751908	0	0	0.800522	0.67411	15.7935	8.97027	69.7846	21.6915	309.753	63.4315	15.2125	0.669384	106.191	391.688	41789.6	3.48025	4.14371	6.30293	1	0.5	491.088	0.189003	17.2681	473.631	2505.94	0.839887	0.00630358	767.968
645	0	82.0872	0.175322	3.77661	8.98789	1.14791	50.471	19.6906	296.397	115.394	580.495	125.736	1390.51	241.829	117.478	232.773	516.232	3950.78	33625.3	14.3083	6.45359	7.18856	1	0.5	2916.7	86.0391	376.695	2453.97	28.5215	2.21711	0.450907	781.024
646	0.680967	88.9744	0.554352	6.67858	10.2458	2.20424	74.5993	29.533	449.378	180.972	957.795	208.528	2341.85	416.953	65.784	113.427	377.259	6395.76	36435.9	33.8867	11.0147	8.36881	1	0.5	4768.95	96.8883	565.96	4106.1	42.3797	3.07651	0.300662	796.534
647	0.0281147	21.397	0.125201	2.67775	4.82651	1.39816	32.0988	11.4389	167.698	64.2146	325.16	67.4995	760.02	134.433	406.227	736.23	808.342	2265.11	35055	8.64296	3.36306	15.0099	1	0.5	1593.02	24.2281	217.461	1351.33	55.7752	2.56997	0.91079	860.639
648	0.0300156	32.8594	0.0890682	3.11709	7.27158	1.45164	40.0618	13.8836	199.635	74.0353	362.605	74.9525	809.016	136.167	349.743	635.293	878.823	2469.25	31931.6	10.0042	3.98116	16.0215	1	0.5	1755.18	36.0955	262.304	1456.78	40.3589	2.51289	0.722891	868.275
649	0.901566	102.032	0.59645	6.8182	12.338	2.67862	73.9071	30.0572	444.089	173.711	899.094	193.948	2196.61	380.72	130.393	241.09	331.824	6126.77	34154.2	33.3989	11.2167	15.0307	1	0.5	4517.5	110.349	563.07	3844.08	34.8358	2.97762	0.726559	860.8
650	2.15543	89.8953	1.17911	8.8109	11.9517	2.58002	68.7198	25.2001	351.581	134.113	671.529	144.002	1624.98	276.8	642.066	1235.2	1436.22	4666.17	32326.7	18.2705	6.28208	18.4263	1	0.5	3413.5	102.041	460.033	2851.42	27.944	2.90835	0.860032	885.003
651	0.0264154	28.1727	0.0976999	2.16505	4.92066	1.8753	35.3379	12.5913	174.326	68.0467	365.186	78.1816	909.715	169.21	291.108	520.365	632.68	2414.47	33649.7	6.54886	3.21507	6.18775	1	0.5	1849.85	30.4618	229.051	1590.34	52.2076	2.03693	0.822478	766.163
652	0.0696155	224.956	0.761593	16.0841	24.6591	3.95087	111.644	35.2746	455.563	160.658	760.716	148.499	1573.24	271.632	122.323	260.218	139.212	5169.62	23479.1	6.42143	1.7158	19.2981	1	0.5	3787.7	241.871	631.092	2914.74	12.0508	3.74252	1.86923	890.64
653	0	0.385935	0	0	0.091682	0.0244145	0.711992	0.656832	18.1007	11.9613	104.651	34.5331	564.249	119.505	16.2423	1.61119	285.018	532.243	43270.8	10.7682	7.80211	7.263	1	0.5	854.872	0.385935	19.5856	834.9	2163.32	1.38016	0.00565295	782.061
654	0.0743194	0.502791	0.0736002	0.429329	0	0.166607	0.649817	0.50345	14.6134	11.2183	96.6903	30.7242	500.616	106.807	17.9301	2.87693	219.528	488.829	42842.8	7.12782	3.93685	3.23001	1	0.5	763.069	1.08004	15.9333	746.056	690.767	1.81054	0.0131051	706.289
655	0.0325349	0.391902	0.0120478	0	0.245953	0.0218166	0.71282	0.556579	16.3483	8.90846	60.1407	16.6314	232.995	44.769	7.49535	0.83481	162.471	389.966	40949.2	4.29529	2.5873	4.56915	1	0.5	381.767	0.436485	17.8854	363.445	832.663	1.66015	0.0051382	737.348
656	0.0311521	0.270112	0	0.134521	0.156967	0	0.682655	0.414416	13.3907	9.49563	75.3847	25.9799	417.615	94.455	11.768	2.4016	189.071	402.991	42318.2	3.84341	2.92224	4.92269	1	0.5	638.011	0.435784	14.6448	622.931	1429.45	1.31523	0.0127021	744.28
657	0.140008	0.606837	0	0.302212	0	0.281513	0.306866	0.399034	13.2855	10.2087	80.4287	28.0407	514.301	119.265	17.3394	1.13635	161.597	395.105	44624.9	5.61352	3.51098	6.33289	1	0.5	767.566	1.04906	14.2729	752.244	717.067	1.59885	0.00703202	768.434
658	0.159167	0.481227	0	0.0980352	0.114428	0.15221	3.09279	1.23729	22.3874	8.07836	36.2713	6.93868	76.1767	11.2235	2.97823	1.13359	126.381	330.843	36346	1.99093	2.6659	5.09946	1	0.5	166.411	0.738429	26.9841	138.688	187.816	0.746813	0.00896958	747.595
659	0.0351432	0.743241	0.025965	0.0757032	0.265124	0.117541	1.46573	0.500033	14.8449	7.93537	46.9861	11.9203	153.569	28.1897	10.425	1.4134	157.145	339.35	39093.9	4.35483	2.35819	3.58267	1	0.5	266.674	0.880053	17.1933	248.601	282.484	1.84668	0.00899423	715.366
660	0.044	5.75	0.48	6.69	12.6	1.18	43.7	10.9	114	35.8	148	28.5	254	51.6	390	275	473	1125	8535	1.47	0.587	9.15	1	1	713.244	12.964	182.38	517.9	39.9491	2.50426	0.581395	737.466
661	0.0058	3.87	0.098	1.51	2.51	0.39	13.4	3.4	37.2	12.4	55.5	11.5	106	22.3	184	108	270	412	9395	0.73	0.394	8.75	1	1	270.084	5.4838	56.9	207.7	37.8752	1.85279	0.4	733.352
662	0.025	7.65	0.079	1.37	2.87	0.13	12.1	3.65	40.7	14.7	63.4	12.6	112	22	136	113	195	443	10126	1.68	0.805	8.79	1	1	293.274	9.124	59.45	224.7	24.6274	2.08696	0.579487	733.77
663	0.024	7.96	0.28	5.42	6.92	0.4	26.9	7.32	74.9	25.1	102	19.2	166	31.6	90.1	93.5	101	757	9326	1.17	0.463	6.84	1	1	474.024	13.684	116.44	343.9	25.1315	2.527	0.925743	711.275
664	0.02	1.51	0.088	2.35	4.61	0.16	26.1	8.75	100	39.1	174	36.3	330	66.5	59.8	78.9	192	1182	9481	0.5	0.384	10.4	1	1	789.488	3.968	139.62	645.9	162.777	1.30208	0.410938	749.439
665	0	3.81	0.024	0.62	2.96	0.16	22.7	8.51	89.6	27.2	103	18.2	164	31.4	48.7	55.3	352	857	12746	5.04	4.2	15.4	1	1	472.184	4.454	123.93	343.8	77.189	1.2	0.157102	787.98
666	3.21	30.9	1.7	9.84	9.17	0.27	45.1	22.2	318	135	655	144	1327	253	168	300	1114	4268	13035	5.56	3.391	14.6	1	1	2954.39	45.65	394.74	2514	55.0712	1.63963	0.2693	782.573
667	0	3.66	0.18	3.44	5.92	0.25	29.4	9.31	99.9	36.5	154	29.1	258	49.9	24.2	75.4	183	1081	10301	1.08	0.619	13.9	1	1	679.56	7.28	144.78	527.5	72.4588	1.74475	0.412022	777.641
668	0.26	2.95	0.18	1.21	2.93	2.09	11.2	1.71	11.5	2.78	8.85	1.22	9.2	1.42	32.2	2.87	452	98.4	11625	0.11	0.047	11.7	1	1	57.5	4.6	29.43	23.47	5.10217	2.34043	0.00634956	760.706
669	0.993	30.717	2.481	17.2	14.6	5.13	25.2	6.91	62.4	13.3	40.9	7.87	67.9	9.58	8.58	2.18	172	292	11583	0.28	0.063	33.7	1	1	305.181	51.391	114.24	139.55	2.71546	4.44444	0.0126744	874.25
670	0.035	7.53	0.077	0.71	1.47	0.16	8.4	3.34	49.6	24.8	152	41.8	462	105	273	155	889	867	8705	18.2	9.58	12.1	1	0.5	856.922	8.352	62.97	785.6	94.0613	1.89979	0.174353	836.116
671	0.076	21	0.23	3.68	6.79	0.45	40.7	13.5	157	59.2	260	51.2	448	85.1	100	185	445	1758	8851	7.84	3.46	13.5	1	0.5	1146.93	24.986	218.44	903.5	36.1602	2.2659	0.41573	848.441
672	0.004	3.24	0.006	0.22	0.59	0.28	4.93	2.09	22.1	6.11	21	3.27	23.8	4.08	7.84	1.6	192	199	11483	1.11	0.43	3.54	1	0.5	91.72	3.47	29.99	58.26	16.7896	2.5814	0.00833333	714.308
673	0.066	13.9	0.033	0.37	0.78	0.26	6.43	3.12	48.1	23.1	135	33.6	344	67.2	232	50.1	872	801	12798	15.4	15.8	8.86	1	0.5	675.959	14.369	58.69	602.9	41.9584	0.974684	0.0574541	802.472
674	0.048	11.9	0.2	3.33	5.36	0.41	30.1	9.84	118	49.4	245	53.7	530	114	140	128	580	1524	8062	14.1	3.23	13.5	1	0.5	1171.29	15.478	163.71	992.1	64.0974	4.36533	0.22069	848.441
675	0.006	7.6	0.018	0.51	1.04	0.25	6.88	2.6	36	15.1	81	19	191	40.2	54.8	75	547	498	11422	5.33	2.79	14.5	1	0.5	401.204	8.134	46.77	346.3	42.5744	1.91039	0.137112	856.633
676	0.011	3.68	0.005	0.14	0.43	0.27	4.98	2.23	22.4	6.13	22.1	3.68	27.2	5.26	15.2	9.65	342	205	11350	1.38	0.59	8.04	1	0.5	98.516	3.836	30.31	64.37	16.7805	2.33898	0.0282164	792.4
677	0.37	12.7	0.38	4.98	8.36	0.6	52.7	16.8	198	76.2	332	63.9	561	109	167	191	660	2328	8997	11.4	5.99	11.1	1	0.5	1436.99	18.43	276.46	1142.1	61.9696	1.90317	0.289394	826.595
678	0.041	13.7	0.2	3.43	6.31	0.44	38.5	11.9	140	51.3	218	41.3	345	64	70.9	100	239	1526	9918	4.26	1.98	5.69	1	0.5	934.121	17.371	197.15	719.6	41.4254	2.15152	0.41841	758.031
679	0	2.86	0	0.15	0.73	0.21	4.42	1.92	18.7	5.21	18.5	3.13	24	4.09	12.4	2.3	320	174	13554	0.93	0.34	3.93	1	0.5	83.92	3.01	25.98	54.93	18.2492	2.73529	0.0071875	723.615
680	0.012	3.99	0.017	0.12	0.67	0.35	5.63	2.33	23.9	6.61	22.5	3.65	28.7	4.93	11.2	5.7	282	214	12846	1.33	0.43	7.58	1	0.5	103.409	4.139	32.88	66.39	16.0401	3.09302	0.0202128	786.382
681	0.013	7.23	0.035	0.58	0.92	0.14	6.01	2.25	34.6	18.1	110	27.8	291	67.8	161	103	504	610	9068	6.81	4.87	9.07	1	0.5	566.478	7.858	43.92	514.7	65.5001	1.39836	0.204365	804.929
682	0.12	12.1	0.053	0.49	1.05	0.22	10.3	4.54	64.8	28.7	147	34.2	321	60.4	109	128	578	955	12992	6.3	4.25	10.4	1	0.5	684.973	12.763	80.91	591.3	46.3292	1.48235	0.221453	819.513
683	0.13	41.3	0.39	6.85	10.9	0.76	62	21.9	281	107	481	96.4	805	145	238	486	621	3391	9381	12.8	3.98	15.8	1	0.5	2059.63	48.67	376.56	1634.4	33.5813	3.21608	0.782609	866.637
684	0.007	4.98	0.007	0.23	0.67	0.4	5.69	1.98	19.3	5.07	17.3	2.94	23.8	4.44	14.7	7.1	339	161	12609	1.14	0.47	5.66	1	0.5	86.814	5.224	28.04	53.55	10.2508	2.42553	0.020944	757.522
685	0.19	47.6	0.28	3.39	7.25	0.57	46.6	16.4	199	74.6	325	63.9	531	96.3	147	264	480	2258	8669	15.1	5.98	11	1	0.5	1412.08	51.46	269.82	1090.8	21.197	2.52508	0.55	825.606
686	0.039	47.4	0.31	5.12	9.09	0.45	53.6	17.2	215	78.7	336	63.4	540	95.5	195	256	412	2419	8437	12.7	4.73	7.62	1	0.5	1461.81	52.869	295.34	1113.6	21.0634	2.68499	0.621359	786.917
687	0.002	3.96	0.008	0.24	0.5	0.33	6.05	2.52	25.9	7.09	25.2	4.03	32.2	5.31	13.1	4.8	305	228	12298	1.36	0.56	8.96	1	0.5	113.34	4.21	35.3	73.83	17.5368	2.42857	0.0157377	803.648
688	0.076	3.55	0.039	0.34	1.25	0.53	9.17	4.77	70.4	33.1	188	51.5	614	137	178	9.9	799	1063	12276	10.21	11.48	8.9	1	0.5	1113.72	4.005	86.12	1023.6	255.581	0.889373	0.0123905	802.943
689	0.017	2.34	0.014	0.16	0.6	0.29	5.96	3.81	63.5	27.3	147	37.1	406	86	48	2.05	237	887	12621	3.35	2.6	7	1	0.5	780.091	2.531	74.16	703.4	277.914	1.28846	0.00864979	778.358
690	0.044	2.98	0.074	0.53	1.58	0.82	13.3	6.7	92.1	40.4	223	61.5	693	152	66.7	12.48	389	1262	11712	2.87	1.81	11.5	1	0.5	1288.03	3.628	114.5	1169.9	322.464	1.58564	0.0320823	830.483
691	0.16	3.35	0.097	0.86	2.17	1.26	13.8	7.09	91.8	37.1	206	56.6	642	141	65	20.63	451	1178	11735	3.44	3.05	19.7	1	0.5	1203.29	4.467	116.12	1082.7	242.377	1.12787	0.0457428	893.171
692	0.75	4.05	0.33	1.67	1.52	0.72	9.06	4.46	63.6	26.9	143	36.2	390	86	175	10.74	751	915	12455	1.93	1.48	7.42	1	0.5	768.26	6.8	79.36	682.1	100.309	1.30405	0.0143009	784.22
693	0.38	3.42	0.045	0.47	0.59	0.31	6.23	3.88	68.8	34	197	56	638	142	121	5.72	351	1086	11872	9.46	8.47	3.96	1	0.5	1151.12	4.315	79.81	1067	247.277	1.11688	0.0162963	724.299
694	0.012	2.33	0.008	0.16	0.5	0.27	4.48	2.23	27.4	8.75	30.9	5.22	39.4	6.73	7.86	3.68	199	279	12022	0.52	0.18	7.38	1	0.5	128.39	2.51	34.88	91	36.255	2.88889	0.0184925	783.673
695	0.63	8.66	0.28	1.92	1.45	0.77	9.86	4.51	64.5	27.3	146	37.1	423	104	153	71.6	734	959	12548	4.24	3.23	9.19	1	0.5	829.98	11.49	81.09	737.4	64.1775	1.31269	0.0975477	806.313
696	0.086	4.69	0.016	0.21	0.37	0.22	4.41	2.41	38.9	19.1	110	30	341	81.1	190	13.6	600	649	12278	3.52	3.45	6.14	1	0.5	632.512	5.002	46.31	581.2	116.194	1.02029	0.0226667	765.406
697	0.07	5.05	0.04	0.49	0.99	0.39	8.12	4.14	60.6	27.8	143	37.9	411	91.6	98.3	49.2	416	917	12437	3.38	3.49	8.17	1	0.5	791.19	5.65	74.24	711.3	125.894	0.968481	0.118269	794.051
698	0.137	2.44	0.16	0.36	0.58	0.28	5.63	3.16	51.1	21.5	105	25.1	260	54.6	45.4	2.32	191	704	11757	1.8	1.27	5.68	1	0.5	530.047	3.097	60.75	466.2	150.533	1.41732	0.0121466	757.862
699	1.35	4.73	0.57	3.51	2.43	0.73	10.4	4.9	73.6	33.1	187	52.5	611	142	256	7.45	894	1071	12299	4.32	8.25	5.02	1	0.5	1127.82	10.16	92.06	1025.6	100.945	0.523636	0.00833333	746.117
700	0.023	2.45	0.018	0.19	0.78	0.33	6.49	4.04	66.2	31	181	50.5	586	131	174	6.21	492	996	11743	1.74	0.85	4.46	1	0.5	1060.02	2.681	77.84	979.5	365.349	2.04706	0.012622	735.119
701	0.061	3.65	0.024	0.32	0.81	0.4	7.33	4.32	76.7	38.5	232	67	780	171	103	6.46	298	1281	11969	3.34	2.13	5.15	1	0.5	1382.12	4.055	89.56	1288.5	317.756	1.56808	0.0216779	748.526
702	0.012	4.31	0.019	0.11	0.61	0.3	6.64	3.97	71.9	34.9	206	55.9	638	139	108	6.35	322	1166	11384	2.31	1.14	4.54	1	0.5	1161.67	4.451	83.42	1073.8	241.249	2.02632	0.0197205	736.757
703	0.003	2.55	0.01	0.16	0.37	0.39	5.28	2.74	34.5	11.1	38.1	6.43	46.9	8.42	7.39	3.74	183	339	13153	0.55	0.25	6.6	1	0.5	156.953	2.723	43.28	110.95	40.7455	2.2	0.0204372	772.505
704	0.027	3.16	0.009	0.25	0.54	0.29	5.02	2.62	34.7	12.4	49.6	9.5	78.5	13.5	5.82	3.65	128	391	11856	0.61	0.3	9.24	1	0.5	210.116	3.446	43.17	163.5	47.4463	2.03333	0.0285156	806.886
705	0.005	3.31	0.017	0.1	0.6	0.27	5.38	3.01	42.9	16.9	81.1	18.6	188	40.6	87.1	7.12	382	537	11844	2.34	1.88	6.74	1	0.5	400.792	3.432	52.16	345.2	100.583	1.24468	0.0186387	774.585
706	0.014	4.73	0.017	0.17	0.72	0.39	6.33	3.89	66.4	33	196	54.9	634	138	102	4.57	300	1094	11855	0.57	0.32	3.78	1	0.5	1138.56	4.931	77.73	1055.9	214.135	1.78125	0.0152333	720.129
707	0.064	5.02	0.04	0.51	0.8	0.4	6.91	3.36	47.3	20.8	108	27	298	67.7	70.8	34.6	412	683	12110	4.55	3.29	12	1	0.5	585.904	5.634	58.77	521.5	92.563	1.38298	0.0839806	835.193
708	0.799	15.3	0.35	1.98	1.44	0.58	9.36	4.53	61.4	26.5	138	33.8	365	83.6	161	80.1	760	877	12199	8.68	6.35	11.9	1	0.5	742.639	18.429	77.31	646.9	35.1023	1.36693	0.105395	834.264
709	0.015	1.2	0.026	0.2	0.48	0.41	5.29	3.29	55.5	24.3	121	29.3	323	69.1	180	7.34	694	824	10706	3.31	2.47	6.44	1	0.5	633.111	1.441	64.97	566.7	393.269	1.34008	0.0105764	770.082
710	0.035	1.77	0.004	0.12	0.57	0.3	3.93	1.71	17.6	4.83	15.6	2.57	19.5	3.55	11.5	2.39	293	155	11341	0.41	0.19	5.2	1	0.5	72.089	1.929	24.11	46.05	23.8725	2.15789	0.008157	749.439
711	0.041	2.18	0.004	0.16	0.51	0.3	4.32	1.81	19.4	5.19	16.3	2.5	19.4	3.17	11.6	3.91	270	166	11465	0.47	0.18	5.1	1	0.5	75.285	2.385	26.34	46.56	19.522	2.61111	0.0144815	747.605
712	0.12	1.14	0.018	0.081	0.44	0.32	5.74	3.23	52.1	23.3	121	30.3	331	69.3	103	3.31	422	759	11930	1.42	1.32	4.38	1	0.5	638.089	1.359	61.83	574.9	423.032	1.07576	0.0078436	733.457
713	0.014	0.84	0.011	0.18	0.53	0.42	6.53	4.08	72.8	34.5	193	52.1	575	123	76.9	3.08	296	1126	11624	1.5	1.29	4.67	1	0.5	1063.01	1.045	84.36	977.6	935.502	1.16279	0.0104054	739.369
714	0.004	1.83	0.007	0.18	0.49	0.42	5.35	2.35	33.1	12.4	57.1	13.2	132	27.1	46.9	4.79	367	388	12014	1.01	0.61	4.92	1	0.5	285.531	2.021	41.71	241.8	119.644	1.65574	0.0130518	744.229
715	0.011	0.6	0.014	0.13	0.55	0.53	6.29	3.79	66.4	30.7	166	44.9	508	111	85.1	2.08	298	997	12087	1.32	1.07	3.94	1	0.5	938.915	0.755	77.56	860.6	1139.87	1.23364	0.00697987	723.844
716	0	1.07	0.012	0.23	0.73	0.38	9.13	5.21	94.3	45.5	254	65.7	693	145	80.6	4.72	286	1444	11060	1.52	1.27	6.71	1	0.5	1314.26	1.312	109.75	1203.2	917.073	1.19685	0.0165035	774.142
717	0	0.59	0.007	0.084	0.53	0.31	6.96	4.49	75.9	33	176	44.9	500	107	75.4	1.9	261	1072	11912	1.34	0.97	4.53	1	0.5	949.771	0.681	88.19	860.9	1264.17	1.38144	0.00727969	736.553
718	0.014	1.15	0.016	0.22	0.27	0.35	4.96	2.86	46.4	20.5	114	29.1	314	66.9	79.3	4.16	418	673	11157	1.31	1.16	5.58	1	0.5	600.74	1.4	54.84	544.5	388.929	1.12931	0.00995215	756.156
719	0	1.43	0	0.16	0.59	0.28	5.72	2.87	45.6	19.9	104	26.2	279	57.8	39.4	4.3	266	629	11374	0.85	0.58	4.38	1	0.5	543.55	1.59	55.06	486.9	306.226	1.46552	0.0161654	733.457
720	0.005	0.47	0.009	0.13	0.37	0.25	4.41	3.24	60.6	28	153	40.7	460	97.6	72.1	4.85	260	878	10934	1.73	1.5	3.99	1	0.5	848.784	0.614	68.87	779.3	1269.22	1.15333	0.0186538	724.979
721	0.009	0.91	0.014	0.12	0.74	0.31	6.54	4.18	75.8	35.5	196	50.8	555	117	70.1	5.43	281	1153	11816	1.44	1.13	5.18	1	0.5	1042.92	1.053	87.57	954.3	906.268	1.27434	0.0193238	749.075
722	0	1.35	0	0.11	0.32	0.24	3.79	2.13	31.6	12.9	66	16.7	181	37.5	29.6	5.34	282	406	11314	0.67	0.42	4.03	1	0.5	353.64	1.46	38.08	314.1	215.137	1.59524	0.0189362	725.879
723	0.011	0.62	0.018	0.22	0.46	0.42	7.27	4.31	74.1	32.6	176	46.1	516	109	80.7	6.24	344	1069	11965	1.51	1.23	6.18	1	0.5	967.129	0.869	86.56	879.7	1012.31	1.22764	0.0181395	766.04
724	0.002	0.68	0.012	0.12	0.32	0.26	4.56	3.03	53.3	26	152	40.4	464	98.1	78.1	2.92	282	841	11352	1.06	0.94	3.15	1	0.5	842.784	0.814	61.47	780.5	958.845	1.12766	0.0103546	704.116
725	0.008	0.84	0.011	0.35	0.56	0.27	6.64	4.03	72.2	32.4	175	44.9	484	101	76.4	6.33	317	1066	11610	1.49	1.07	4.52	1	0.5	922.209	1.209	83.7	837.3	692.556	1.39252	0.0199685	736.349
726	0.009	0.58	0.003	0.16	0.53	0.25	5.46	3.23	61.5	28.6	161	42.6	475	101	80.3	4.66	292	916	11722	0.99	0.99	4.93	1	0.5	879.922	0.752	70.97	808.2	1074.73	1	0.0159589	744.419
727	0	1.84	0.008	0.15	0.35	0.29	3.35	1.46	16.8	4.43	15.9	2.89	22.2	3.9	11.1	3.66	257	150	11686	0.52	0.19	5.3	1	0.5	73.568	1.998	22.25	49.32	24.6847	2.73684	0.0142412	751.245
728	0.007	0.91	0.024	0.12	0.38	0.36	4.73	3.15	54.2	23.1	127	31.6	343	71.8	100	7.89	453	769	11327	1.38	1.21	4.35	1	0.5	660.381	1.061	62.82	596.5	562.205	1.1405	0.0174172	732.827
729	0.011	1.3	0.013	0.14	0.54	0.26	4.58	2.54	41.2	17.9	99	25.2	282	61.8	67.4	5.39	381	578	11693	1	0.84	3.98	1	0.5	536.484	1.464	49.12	485.9	331.899	1.19048	0.014147	724.753
730	0	1.42	0.016	0.09	0.5	0.28	4.94	1.88	24	7	26	4.5	38.6	6.7	8.77	0.83	201	238	13067	0.9	0.35	4.71	1	0.5	115.926	1.526	31.6	82.8	54.2595	2.57143	0.00412935	740.16
731	0.014	1.62	0.011	0.11	0.75	0.51	8.47	4.98	82.7	36.5	190	47.9	539	107	197	7.07	613	1128	11822	5.2	4.51	9.86	1	0.5	1019.57	1.755	97.41	920.4	524.444	1.15299	0.0115334	813.784
732	0.004	2.01	0.007	0.11	0.58	0.44	5.33	2.4	29	8.72	32.2	5.59	46.4	7.86	10.7	1.23	248	278	12352	1.03	0.59	7.24	1	0.5	140.651	2.131	37.75	100.77	47.2877	1.74576	0.00495968	781.741
733	0.023	2.24	0.025	0.34	1.11	0.66	9.82	5.44	89.4	42.5	241	60.9	677	141	140	6.65	584	1396	11672	4.09	3.85	8.1	1	0.5	1271.46	2.628	106.43	1162.4	442.314	1.06234	0.011387	793.165
734	0.002	1.66	0.001	0.063	0.56	0.37	5.05	2.31	26.4	7.81	26.7	4.48	34.6	5.83	8.65	0.71	201	257	12109	0.83	0.38	4.28	1	0.5	115.836	1.726	34.69	79.42	46.0139	2.18421	0.00353234	731.344
735	0.003	2.51	0.015	0.24	0.8	0.54	9.85	5.44	84.6	37.5	208	54.5	612	130	145	7.21	598	1246	12038	3.24	2.42	7.69	1	0.5	1146	2.768	101.23	1042	376.445	1.33884	0.0120569	787.848
736	0.011	1.5	0	0.19	0.84	0.36	8.32	5.21	88.8	42.1	246	64.3	730	155	214	5.51	690	1384	12140	3.65	3.85	4.19	1	0.5	1342.63	1.701	103.53	1237.4	727.454	0.948052	0.00798551	729.407
737	0.033	2.21	0.019	0.25	0.59	0.53	5.21	2.62	30.8	9.65	36.1	6.42	53.4	8.71	12.5	1.27	271	320	11870	1.44	0.64	7.33	1	0.5	156.542	2.512	39.75	114.28	45.4936	2.25	0.00468635	782.987
738	0.013	1.15	0.02	0.26	0.9	0.51	9.55	5.27	86.4	38.4	217	57	670	144	175	5.56	497	1224	11359	2.69	2.21	5.03	1	0.5	1230.47	1.443	102.63	1126.4	780.596	1.21719	0.0111871	746.304
739	0.011	1.55	0.002	0.12	0.47	0.32	4.98	2.56	34	11.9	54	12	122	24.2	36.2	1.25	240	378	11715	1.46	0.69	5.59	1	0.5	268.113	1.683	42.33	224.1	133.155	2.11594	0.00520833	756.328
740	0.002	1.79	0.002	0.13	0.5	0.4	5.06	2.39	28.1	8.68	31.6	5.33	42.5	7.05	9.47	1.06	228	280	11763	0.95	0.5	6.75	1	0.5	133.534	1.924	36.45	95.16	49.4595	1.9	0.00464912	774.733
741	0.028	1.66	0.021	0.16	0.71	0.42	6.74	3.26	53.1	26	171	49.4	621	143	273	8.32	1039	863	12050	3.34	3.6	7.46	1	0.5	1076.5	1.869	64.23	1010.4	540.61	0.927778	0.0080077	784.764
742	0	2.02	0.014	0.2	0.5	0.48	5.45	2.23	26	7.4	25.9	4.23	35.4	6	9.27	1.29	245	240	12265	0.98	0.44	7.24	1	0.5	115.824	2.234	34.66	78.93	35.3312	2.22727	0.00526531	781.741
743	0.013	1.36	0.005	0.11	0.76	0.4	7.77	4.6	80.1	38.7	237	64.4	775	166	215	2.58	674	1258	11883	4.01	4.13	6.15	1	0.5	1376.22	1.488	93.63	1281.1	860.954	0.970944	0.00382789	765.565
744	0.01	1.51	0	0.13	0.47	0.37	5.27	3.88	74	32.7	180	45	523	109	240	13.08	647	1080	11398	5.02	3.94	5.26	1	0.5	975.34	1.65	83.99	889.7	539.212	1.27411	0.0202164	750.526
745	0.01	1.49	0.012	0.13	0.72	0.31	6.59	4.12	72.7	34.2	200	52.4	604	130	162	4.01	500	1117	11279	3.02	2.91	3.98	1	0.5	1106.68	1.642	84.44	1020.6	621.559	1.0378	0.00802	724.753
746	0.004	1.49	0.015	0.07	0.46	0.3	5.17	2.47	33.7	13	61.4	14.4	155	31.3	53.3	1.96	315	399	10939	1.39	1.08	4.59	1	0.5	318.779	1.579	42.1	275.1	174.224	1.28704	0.00622222	737.768
747	0	2.11	0.005	0.089	0.38	0.41	5.3	2.05	24	7.19	24.2	4.19	31.6	5.1	12.5	2.04	318	228	11475	0.98	0.39	8.59	1	0.5	106.624	2.204	32.14	72.28	32.7949	2.51282	0.00641509	799.242
748	0	1.67	0.006	0.097	0.43	0.36	5.32	2.36	27.8	8.14	27.8	4.43	35.2	5.73	8.92	0.64	216	253	10813	0.99	0.36	6.44	1	0.5	119.343	1.773	36.27	81.3	45.8545	2.75	0.00296296	770.082
749	0.006	0.74	0.013	0.18	0.67	0.55	8.73	4.89	89.8	39.5	217	55.2	611	126	82.4	1.84	252	1286	10984	1.55	1.61	4.62	1	0.5	1154.28	0.939	104.64	1048.7	1116.83	0.962733	0.00730159	738.371
750	0.031	1.39	0.008	0.18	0.8	0.43	6.97	3.8	66.4	29.2	172	44.4	493	107	115	5.91	530	988	10350	5.1	5.54	6.65	1	0.5	925.609	1.609	78.4	845.6	525.544	0.920578	0.0111509	773.252
751	0.005	1.78	0.014	0.16	0.58	0.42	4.36	1.98	24.4	7.47	28.4	4.95	40.2	7.36	6.43	0.74	152	251	10433	0.89	0.39	6.48	1	0.5	122.079	1.959	31.74	88.38	45.1149	2.28205	0.00486842	770.692
752	0.01	1.62	0.004	0.17	0.6	0.34	6.53	3.56	60.1	27	156	40	452	98.5	89.8	4.12	410	899	10354	2.68	2.62	4.33	1	0.5	846.434	1.804	71.13	773.5	428.769	1.0229	0.0100488	732.405
753	0	1.69	0.001	0.08	0.36	0.36	3.84	1.99	22.5	6.51	23.1	3.71	28.7	4.81	7.71	0.62	184	216	10322	0.67	0.25	3.66	1	0.5	97.651	1.771	29.05	66.83	37.7357	2.68	0.00336957	717.258
754	0	1.71	0.003	0.1	0.45	0.24	3.5	1.62	17.4	5.25	18.1	3.13	23.6	3.96	10.2	1.61	264	170	10870	0.61	0.24	5.89	1	0.5	79.063	1.813	23.21	54.04	29.8069	2.54167	0.00609848	761.365
755	0.01	14.4	0.01	0.31	1.39	0.47	5.9	2.04	25.5	10.2	45.5	11.2	115	20.1	53.7	21.1	31.47	301	6583	1.3	0.3	4.1	1	0.5	252.03	14.73	35.3	202	13.7135	4.33333	0.67048	727.437
756	0.01	43.2	0.03	0.67	2.07	0.4	12.4	5.43	76.9	33.9	179.8	44.6	475	86.9	47.4	135.73	166.95	1109	8771	11.6	2.6	3.1	1	0.5	961.31	43.91	97.2	820.2	18.6791	4.46154	0.812998	702.736
757	0.02	48.2	0.11	1.96	3.45	1.22	18.8	7.34	90.2	36.5	173.4	40	426	75.5	45.2	75.83	76.69	1081	6854	4.4	1	3.4	1	0.5	922.7	50.29	121.01	751.4	14.9413	4.4	0.988786	710.761
758	0.01	38.4	0.07	0.87	2.65	1.2	15.8	6.12	74.8	31	145.8	34	366	64.2	52.3	56.85	59.17	944	7032	3.5	0.8	5.3	1	0.5	780.92	39.35	100.57	641	16.2897	4.375	0.960791	751.245
759	0.02	48.2	0.1	1.62	3.5	0.92	14.5	5.31	69.4	27.8	133	29.8	318	54.8	46.3	212.8	146.59	838	7658	6.5	1	5.9	1	0.5	706.97	49.94	93.63	563.4	11.2815	6.5	1.45167	761.529
760	0	39.5	0.07	2.05	3.11	0.89	16.2	5.64	71	28.9	126.7	28.6	292	49.1	31.4	95.71	121.84	819	7448	4.7	0.9	3.7	1	0.5	663.76	41.62	96.84	525.3	12.6213	5.22222	0.785538	718.223
761	0.01	0	0	0.05	0.05	0.01	0.1	0.01	0.6	0.8	23.8	19.2	340	47.3	25.2	0.0075	122.63	146	13146	24.8	2.1	9.4	1	0.5	431.93	0.06	0.77	431.1	7185	11.8095	6.11596e-05	808.701
762	0.35	47.7	0.41	4.18	2.94	0.47	13.9	6.14	78.1	32.8	160	38.2	400	68.5	38.5	186.97	187.14	1012	9455	8.7	2.1	6.1	1	0.5	853.69	52.64	101.55	699.5	13.2884	4.14286	0.999092	764.769
763	0.01	29.8	0.08	1.28	2.89	0.55	16.5	6.49	79.6	30.8	139.6	30.4	310	51.7	40.3	86.94	86.53	873	7984	3.4	0.8	4.1	1	0.5	699.7	31.17	106.03	562.5	18.0462	4.25	1.00474	727.437
764	0.01	32.5	0.04	1.16	2.24	1	12.1	4.59	58.8	23.9	118.1	28.8	305	55	38.6	62.76	55.44	723	7550	2.3	0.6	3.5	1	0.5	643.24	33.71	78.73	530.8	15.7461	3.83333	1.13203	713.306
765	0.03	34.1	0.25	4.56	6.82	2.35	31.2	10.03	112.9	40.1	170.1	36.3	360	58.1	44	83.58	64.59	1085	7590	2.7	0.8	4.3	1	0.5	866.84	38.94	163.3	664.6	17.0673	3.375	1.29401	731.77
766	0.43	41.1	0.33	3.04	2.73	0.35	12.2	5.24	74.8	31.7	156.5	38.8	399	66.3	53.4	133.53	171.71	976	10003	8.3	2.4	3.4	1	0.5	832.52	44.9	95.32	692.3	15.4187	3.45833	0.777648	710.761
767	0.01	50.9	0.05	1.05	2.73	0.61	14.2	6.18	82.3	35.1	170.4	40.2	414	71.2	61.7	111.05	116.12	1068	9624	6.5	1.4	3.1	1	0.5	888.93	52.01	106.02	730.9	14.0531	4.64286	0.956338	702.736
768	1.04	119.4	0.83	10.45	16.12	4.16	59.8	18.01	198.6	71	316.6	71.4	719	127.3	37.4	590.24	266.95	2053	6254	14.4	1.4	3.4	1	0.5	1733.71	131.72	296.69	1305.3	9.90966	10.2857	2.21105	710.761
769	0.01	71.1	0.06	1.61	3.62	1.34	21.5	8.33	112.2	45.1	214.1	47.3	479	83.4	38.6	140.24	159.9	1369	9172	6.3	1.2	5.5	1	0.5	1088.67	72.78	146.99	868.9	11.9387	5.25	0.877048	754.774
770	0.03	118.9	0.43	6.94	10.67	4.76	50.7	18.44	223.1	84.7	376.8	82.8	810	140.2	36.5	163.33	91.05	2463	6746	5.8	0.7	5.7	1	0.5	1928.47	126.3	307.67	1494.5	11.8329	8.28571	1.79385	758.2
771	0.14	48.4	0.48	6.92	10.96	4.93	44.5	14.38	168.6	61.5	263	56.2	552	94.4	28.6	81.52	40.93	1783	6218	1.7	0.3	11.4	1	0.5	1326.41	55.94	243.37	1027.1	18.3607	5.66667	1.99169	829.521
772	0.22	53.4	0.21	3.14	4.63	1.93	20	7.73	90.5	35	160.9	36.8	376	65.8	37.1	96.77	62.66	1057	6805	2.3	0.6	6	1	0.5	856.26	56.97	124.79	674.5	11.8396	3.83333	1.54437	763.16
773	0.01	45	0.06	1.21	2.84	1.02	15	6.26	82	34.5	169.5	40.4	421	73.7	34.6	80.86	107.37	1031	8883	4.8	1.2	4.5	1	0.5	892.5	46.28	107.12	739.1	15.9702	4	0.753097	735.941
774	0.02	67.6	0.12	1.76	3.97	1.51	19.9	7.14	92.1	36.4	165.3	37.7	378	65.5	26.5	166.08	96.66	1053	8393	4.3	0.9	3.8	1	0.5	877.02	69.5	124.62	682.9	9.8259	4.77778	1.71819	720.6
775	0.02	79.5	0.12	2.41	5.17	2.13	27.7	10.59	134.4	54.5	260.4	60.5	614	107.4	43.8	117.86	88.22	1645	7382	5.6	1	5.8	1	0.5	1358.84	82.05	179.99	1096.8	13.3675	5.6	1.33598	759.876
776	0.01	59.4	0.11	1.61	3.98	1.47	21.8	8.41	111	45.4	210.6	51	519	89.7	28.1	101.09	87.73	1377	7499	6	1	6.4	1	0.5	1123.49	61.13	146.66	915.7	14.9796	6	1.15229	769.469
777	0.09	34.7	0.4	6.61	9.38	3.87	35.9	11.65	131.9	47.2	202.6	44.6	442	75	33.2	70.33	46.4	1350	6889	1.2	0.4	3.3	1	0.5	1045.9	41.8	192.7	811.4	19.4115	3	1.51573	708.153
778	0.47	30	0.25	1.86	3.99	0.64	18.8	6.88	81.3	30.9	143.3	30.9	296	53.1	98.2	61.31	62.59	920	7855	3.7	0.8	17.2	1	0.5	698.39	32.58	111.61	554.2	17.0104	4.625	0.979549	876.704
779	0.13	57.6	0.34	2.98	3.85	1.68	16.4	5.52	63.1	23.7	106	23.1	242	43	103.7	66.53	38.29	703	5987	1.9	0.3	11.6	1	0.5	589.4	61.05	90.55	437.8	7.17117	6.33333	1.73753	831.438
780	0.01	75.4	0.1	2.08	3.98	1.44	19.6	8.23	96.5	39.3	195.1	43.1	448	80.6	66.7	66.27	56.36	1229	6848	3.9	0.7	4.5	1	0.5	1013.44	77.59	129.75	806.1	10.3892	5.57143	1.17583	735.941
781	0.01	48.2	0.11	2.01	2.84	1.13	18	6.01	77.7	29.9	149.5	32.3	340	61.9	70.6	48.56	42.11	914	6994	2.7	0.6	6.3	1	0.5	769.61	50.33	105.68	613.6	12.1915	4.5	1.15317	767.923
782	0.02	45.3	0.03	0.23	0.87	0.06	6.1	3.77	55.9	29.5	193	56.4	701	142.7	59.4	320.47	652.32	1187	13401	28.2	12.4	4.9	1	0.5	1234.88	45.58	66.7	1122.6	24.6292	2.27419	0.491277	743.848
783	0.1	51.8	0.45	6.17	12.08	0.06	45.1	13.66	144.7	48.8	199.5	38.9	377	65.7	61.6	311.25	196.9	1330	5035	3.5	0.6	8.3	1	0.5	1004.02	58.52	215.6	729.9	12.4727	5.83333	1.58075	795.68
784	0.02	17.9	0.19	2.2	4.08	1.35	15.5	4.55	52.3	19.9	89.1	19.1	199	36.6	48.2	23.94	16.86	595	5745	0.6	0.1	5.2	1	0.5	461.79	20.31	77.78	363.7	17.9074	6	1.41993	749.439
785	0.06	38.5	0.05	1.65	2.79	0.77	12.4	4.89	63.3	26.7	126.3	29.3	307	58.2	44.3	60.11	65.86	792	7527	3.8	0.9	3.6	1	0.5	671.91	40.26	84.15	547.5	13.5991	4.22222	0.912694	715.793
786	0	0	0	0	0.03	0	0.1	0.34	31.5	38.2	313.1	91.2	981	170.6	38.1	0.0045	2822.48	2186	8626	30.4	3.7	4.3	1	0.5	1626.07	0	31.97	1594.1	0	8.21622	1.59434e-06	731.77
787	0.01	29.1	0.04	1.8	2.66	1.34	13.9	5.11	62.8	26.7	132.7	31.2	333	62.3	51.6	42.83	40.12	829	6815	2.1	0.4	4.2	1	0.5	702.66	30.95	85.81	585.9	18.9305	5.25	1.06755	729.624
788	0.02	37.9	0.03	0.93	2.25	1.03	11.1	4.41	55.9	22	102.6	25	265	47.1	46.1	67.8	59.59	676	8111	2.4	0.7	4.2	1	0.5	575.27	38.88	74.69	461.7	11.875	3.42857	1.13777	729.624
789	0.01	117.9	0.14	2.63	4.83	2	32	11.83	151.5	62.4	289.6	65	645	110.9	41.9	149.99	99.12	1832	7261	7	1.1	4.1	1	0.5	1495.74	120.68	202.16	1172.9	9.71909	6.36364	1.51322	727.437
790	0.01	63.7	0.12	2.52	4.97	1.96	23.1	9.22	123.2	50.8	241	55.8	575	103	42.2	123.21	99.12	1540	6956	6.2	1	6.5	1	0.5	1254.4	66.35	162.45	1025.6	15.4574	6.2	1.24304	770.996
791	0.02	40	0.03	0.76	2.23	0.43	14.9	5.85	78.1	33	161.8	39.6	412	72	40.9	104.78	129.74	1000	9438	5	1.1	3.3	1	0.5	860.72	40.81	101.51	718.4	17.6035	4.54545	0.807615	708.153
792	0	0	0.01	0	0.09	0.04	0.1	0.05	2.9	7.6	187.2	124.2	2377	375.6	148.2	0.02	57.85	788	6696	13.4	0.5	20.4	1	0.5	3074.79	0.01	3.18	3071.6	307160	26.8	0.000345722	897.485
793	0.01	77.9	0.16	3.52	6.08	3.23	26.9	10.65	136.2	54.1	251.2	54.6	543	100.1	106.6	105.66	64.01	1605	5679	3.6	0.6	7.9	1	0.5	1267.65	81.59	183.06	1003	12.2932	6	1.65068	790.599
794	0.01	41.1	0.08	2.3	2.2	0.97	11	3.8	46.3	18.6	83.7	19.5	204	34.8	111.1	46.87	39.2	555	6164	1.7	0.4	6.5	1	0.5	468.36	43.49	64.27	360.6	8.29156	4.25	1.19566	770.996
795	0.01	0	0.02	0.09	0.05	0.03	0.1	0.08	5.1	14.4	358.9	240.7	4197	41.89	75.3	0.0069	91.39	1501	6460	17.2	1	20	1	0.5	4858.37	0.12	5.36	4852.89	40440.8	17.2	7.55006e-05	895.034
796	0.01	0	0.01	0.1	0.06	0.03	0.1	0.04	2.8	10.2	431.7	352.5	6531	41.89	53.4	0.01	62.4	1190	6800	7.4	0.7	6.5	1	0.5	7370.44	0.12	3.03	7367.29	61394.1	10.5714	0.000160256	770.996
797	0.09	29.1	0.15	2.81	5.21	0.72	26.1	9	106.9	40.2	177.8	38	377	68	62.9	97.59	144.27	1177	7162	4.8	0.8	6.3	1	0.5	881.08	32.15	147.93	701	21.804	6	0.67644	767.923
798	0.06	46.3	0.54	6.84	9.66	3.99	34.1	10.04	107.5	39.4	165.7	35	343	62.8	63.9	48.29	25.16	1102	5293	1	0.2	8.6	1	0.5	864.93	53.74	165.29	645.9	12.019	5	1.91932	799.363
799	0.03	92.5	0.23	3.19	6.5	2.67	30.4	11	137	53.5	249	52.5	525	93.8	36.6	97.51	65.19	1608	6597	4.5	0.8	5.3	1	0.5	1257.32	95.95	187.57	973.8	10.149	5.625	1.49578	751.245
800	0	0	0.01	0.04	0.04	0.01	0.1	0.09	6.5	19.1	470.6	316	5415	41.89	45.1	0.0085	113.43	2008	7101	21.6	1.1	18.7	1	0.5	6269.38	0.05	6.74	6262.59	125252	19.6364	7.49361e-05	886.795
801	0.05	41.4	0.33	4.69	7.76	2.77	32.9	9.99	114.1	42.3	182	38.4	388	69	57.4	56.6	47.23	1200	6712	1.3	0.4	6.6	1	0.5	933.69	46.47	167.52	719.7	15.4874	3.25	1.19839	772.505
802	0.01	0	0.01	0.06	0.07	0.02	0.1	0.04	2.8	12.9	436.3	315.3	5458	41.89	58	0.0098	78.59	1437	7711	12.5	1.1	9.3	1	0.5	6267.5	0.08	3.03	6264.39	78304.9	11.3636	0.000124698	807.569
803	0.01	53.2	0.17	2.76	5.7	2.5	28.3	9.75	116.2	43.4	202.1	44.1	432	78.1	64.9	119.61	51.41	1288	6426	2.4	0.5	7.8	1	0.5	1018.29	56.14	162.45	799.7	14.2447	4.8	2.32659	789.296
804	0.44	147.9	1.09	15.31	27.88	7.16	117.7	36.34	390.9	133.9	534.3	105.7	924	153.9	88.9	323.65	126.97	3734	6958	7.6	1.2	6.9	1	0.5	2596.52	164.74	579.98	1851.8	11.2407	6.33333	2.54903	776.921
805	0.01	61.6	0.1	1.75	2.84	0.79	14.7	4.81	65.4	27.8	140	33.3	365	65.9	55.2	67.89	69.16	888	7385	5.2	0.9	3.9	1	0.5	784	63.46	88.54	632	9.95903	5.77778	0.981637	722.927
806	2.67	46	1.39	10.6	8.14	0.63	33.9	12.56	152.9	59.1	268.3	56.9	553	96.5	46.9	82.2	101.81	1735	7856	7.8	1.5	3.4	1	0.5	1302.59	60.66	208.13	1033.8	17.0425	5.2	0.807386	710.761
807	0.16	6.06	0.09	0.62	1.5	0.85	4.66	1.63	17.67	7.33	26.47	7.35	49.42	13.17	62.6	32.9	1371.8	152.5	40349	3.71	0.85	34.49	1	1	136.98	6.93	26.31	103.74	14.9697	4.36471	0.0239831	877.017
808	0.02	18.73	0.05	0.62	3.2	1.08	15.05	4.08	36.09	13.01	40.59	9.89	73.08	16.82	52.1	39.7	1194	281.6	48023	4.71	0.85	33.82	1	1	232.31	19.42	59.5	153.39	7.89856	5.54118	0.0332496	874.674
809	0.06	4.14	0.05	0.49	1.6	0.24	3.47	1.17	10.9	2.84	10.03	2.17	18.13	2.9	20.1	34	511.4	112.3	48944	0.98	0.85	27.66	1	1	58.19	4.74	17.38	36.07	7.6097	1.15294	0.0664842	851.196
810	0.14	6.33	0.08	0.62	1.3	0.52	3.26	1.71	20.82	8.09	40.73	8.88	102.73	20.11	16.1	28.6	329.5	328.3	42475	1.59	0.85	40.45	1	1	215.32	7.17	27.61	180.54	25.1799	1.87059	0.0867982	896.417
811	2.26	16.32	1.25	8.57	3.2	1.85	7.61	3.26	49.47	26.85	180.34	62.13	864.64	241.94	140.9	62.9	245	1081.4	47168	23.73	0.85	12.45	1	1	1469.69	28.4	65.39	1375.9	48.4472	27.9176	0.256735	766.75
812	0.09	5.86	0.05	0.12	0.5	0.15	4.02	2.54	42.21	23.26	133.57	39.92	463.35	105.11	29.9	30	1446.2	781.6	35371	10.39	0.85	8.75	1	1	820.75	6.12	49.42	765.21	125.034	12.2235	0.020744	733.352
813	0.02	9.44	0.05	0.62	0.81	0.66	6.16	4.06	61.49	31.37	188.05	53.98	638.75	153.59	43.3	45.8	2110.9	1129.5	34003	10.6	0.85	10.87	1	1	1149.05	10.13	73.18	1065.74	105.206	12.4706	0.0216969	753.638
814	0.02	14.97	0.05	0.08	0.75	0.69	6.06	2.72	42.75	20.47	117.58	36.08	466.88	105.71	24.7	68.6	1026.5	723.9	28870	5.63	0.85	6.72	1	1	814.81	15.12	52.97	746.72	49.3862	6.62353	0.066829	709.725
815	1.82	23.63	1.18	7.32	3.3	1.14	9.78	4.52	66.32	34.08	195.4	57.53	695.86	186.76	85.1	183.1	3582.9	1238.6	38128	13.76	0.85	10.41	1	1	1288.64	33.95	85.06	1169.63	34.4515	16.1882	0.0511039	749.53
816	0.58	10.08	0.25	1.59	2.49	0.83	14.06	7.36	137.32	74.4	418.22	119.26	1364.66	285.32	66.3	81.1	3211.6	2471.7	36226	39.48	0.85	19.01	1	1	2436.42	12.5	162.06	2261.86	180.949	46.4471	0.0252522	809.878
817	3.64	26.51	2.08	12.14	2.81	1.53	9.37	2.16	29.87	14.23	79.79	23.58	309.4	84.58	40.2	78.9	1409.4	510.8	31885	3.54	0.85	23.96	1	1	601.69	44.37	45.74	511.58	11.5299	4.16471	0.0559813	835.008
818	0.03	11.79	0.05	0.62	0.54	0.68	9.51	5.09	91.15	47.39	273.01	71.2	692.27	141.37	28.8	84.9	936.2	228.2	33549	1.77	0.85	39.81	1	1	1344.7	12.49	106.97	1225.24	98.0977	2.08235	0.0906858	894.447
819	0.12	12.31	0.06	0.67	0.98	0.81	12.48	5.56	92.11	47.68	274.95	78.26	931.55	212.15	65.3	76.7	3198.2	1614.8	34512	16.25	0.85	9.4	1	1	1669.69	13.16	111.94	1544.59	117.37	19.1176	0.0239822	739.963
820	0.07	15.42	0.09	0.62	0.55	0.61	4.92	2.35	38.9	18.07	115.54	37.39	489.74	123.4	29.9	80.8	1211.1	696.3	33142	5.57	0.85	7.64	1	1	847.67	16.2	47.33	784.14	48.4037	6.55294	0.0667162	721.07
821	0.18	8.69	0.04	0.34	0.82	0.6	8.95	3.03	43.19	20.8	123.7	37.7	494.41	118.67	31.8	57.8	1455.9	760.3	33697	4.09	0.85	23.6	1	1	861.12	9.25	56.59	795.28	85.9762	4.81176	0.0397005	833.328
822	0.02	9.21	0.01	0.62	1.38	0.46	4.42	2.05	35.19	16.87	102.15	32.29	413.96	105.39	34.4	41.3	1710.1	616.2	32360	4.6	0.85	8.38	1	1	724.02	9.86	43.5	670.66	68.0183	5.41176	0.0241506	729.407
823	0.03	13.59	0.05	0.5	1.94	0.51	5.05	2.59	41.85	22.06	123.47	39.26	506.25	124.71	30.4	63.7	1335.7	748.1	31910	4.8	0.85	6.12	1	1	881.86	14.17	51.94	815.75	57.5688	5.64706	0.0476903	701.618
824	0.62	22.62	0.36	3.93	5.68	3.31	58	25.53	308.89	141.81	574.62	152.21	1158.7	302.15	60.3	164.3	1872.1	2986.83	34335	23.3	0.85	16.09	1	1	2758.43	27.53	401.41	2329.49	84.6164	27.4118	0.0877624	792.464
825	0.02	31.05	0.05	1.37	0.95	0.76	11.16	4.79	59.59	29.89	151.39	52.67	497.95	153.46	38.1	159.2	1189.8	742.75	39689	9.65	0.85	10.45	1	1	995.1	32.49	77.25	885.36	27.2502	11.3529	0.133804	749.893
826	3.59	18.6	0.88	1.35	14.9	8.59	90.5	193	406	16.42	1386	20.06	3449	41.89	87.9	472	4149	1488	13092	9.23	8.35	8.98	0.5	0.5	5650.78	24.42	712.99	4913.37	201.203	1.10539	0.113762	735.736
827	0.133	28.4	0.842	2.84	16.4	25.1	75.9	160	308	16.42	939	20.06	2129	41.89	18.3	79.8	265	975	8600	2.66	1.04	8.93	1	0.5	3763.99	32.215	585.4	3146.37	97.6679	2.55769	0.301132	803.296
828	1.37	23.8	2.79	13.8	55.2	29.6	67	73.9	101	157	213	335	625	41.89	260	52.41	245	381	12159	0.67	0.36	5.99	1	0.5	1740.35	41.76	326.7	1371.89	32.8518	1.86111	0.213918	762.998
829	0.094	22.5	0.02	0.71	1.49	0.17	9.45	4.19	52.3	20.4	97	19.7	190	37.3	191	260	394	619	10888	3.5	1.47	8.64	1	0.5	455.324	23.324	67.6	364.4	15.6234	2.38095	0.659898	799.846
830	0.011	3.42	0.02	0.55	0.87	0.33	10.3	4.63	73.3	36.6	217	58.4	686	157	116	172	5601	1310	9668	6.17	2.85	7.21	1	0.5	1248.43	4.001	89.43	1155	288.678	2.16491	0.0307088	781.323
831	0.063	11.1	0.032	0.48	2.73	0.21	18.4	6.94	86.2	32.8	146	29.7	273	51.4	166	225	409	975	10597	2.58	1.95	5.29	1	0.5	659.055	11.675	114.48	532.9	45.6445	1.32308	0.550122	751.065
832	0	11	0	0.42	2.66	0.47	15.1	5.53	69.6	28.5	137	29.4	292	58.7	220	146	442	862	8608	2.13	1.6	7.05	1	0.5	650.38	11.42	93.36	545.6	47.7758	1.33125	0.330317	779.071
833	0.002	7.94	0.006	0.43	0.81	0.12	8.54	3.74	59.6	29.1	174	46.4	555	132	71.6	367	3369	1042	10838	8.23	4.75	3.4	1	0.5	1017.69	8.378	72.81	936.5	111.781	1.73263	0.108934	710.761
834	0.032	15.8	0.026	0.55	2.84	0.23	21.06	8.32	110.2	44.6	216	46.6	436	85.7	409	356	697	1097	10891	5.91	2.93	9	1	0.5	987.958	16.408	142.65	828.9	50.518	2.01706	0.51076	804.115
835	0.061	8.36	0.105	1.09	0.7	0.16	3.53	1.28	17.9	8.1	44.1	11.2	130	28.3	255	103	547	285	11140	1.39	1.69	15.03	1	0.5	254.886	9.616	23.57	221.7	23.0553	0.822485	0.1883	860.795
836	0.081	10.6	0.044	0.25	1.03	0.28	5.91	2.21	31.1	11.8	56.5	12.3	123	24.2	148	119	335	365	9443	1.85	0.84	7.56	1	0.5	279.305	10.975	40.53	227.8	20.7563	2.20238	0.355224	786.114
837	0	2.18	0	0.16	0.81	0.15	4.04	1.95	31.2	14.1	79.9	19.8	232	52.1	33.5	57.3	1653	479	10461	2.6	1.38	4.36	1	0.5	438.39	2.34	38.15	397.9	170.043	1.88406	0.0346642	733.037
838	0.11	7	0.037	0.515	0.646	0.24	5.72	3.06	46.3	22.7	136	38.1	460	118	128	307	245	821	16243	4.01	1.67	6.29	1	0.5	838.428	7.662	55.966	774.8	101.122	2.4012	1.25306	767.767
839	0.373	14	0.369	1.65	1.19	0.39	8.73	3.55	52.2	24.1	140	37.4	454	118	151.1	822	245	858	12360	2.48	1.28	3.1	1	0.5	855.952	16.392	66.06	773.5	47.1877	1.9375	3.3551	702.736
840	0.406	11.6	0.33	1.55	1.72	0.489	7.28	3.13	43.7	19.5	111	30	366	93.3	104	704	4903	712	12409	2.82	1.4	14.6	1	0.5	690.005	13.886	56.319	619.8	44.6349	2.01429	0.143586	857.428
841	0.02	8.21	0.036	0.342	1.34	0.344	10.9	4	62	28.3	161	42.9	505	120	87.5	558	3950	1015	12224	5.28	2.41	7.17	1	0.5	944.392	8.608	78.584	857.2	99.5818	2.19087	0.141266	780.764
842	0.023	11.5	0.043	0.72	1.26	0.324	9.07	3.76	54.8	25.8	147	40.3	463	116	12	791.6	5481	905	12293	5.35	3.12	7.32	1	0.5	873.6	12.286	69.214	792.1	64.4718	1.71474	0.144426	782.849
843	0.044	9.48	0.047	0.972	1.49	0.597	14.7	5.63	76.9	34.9	192	52	611	148	95.8	637.1	4396	1208	12397	4.01	2.72	4.45	1	0.5	1147.76	10.543	99.317	1037.9	98.4445	1.47426	0.144927	734.912
844	0.026	9.82	0.084	1.374	3.55	0.373	19.1	5.81	67.5	23.8	104	22.6	211	39.2	50.8	67.2	106	712	10067	1.93	0.82	3.87	1	0.5	508.237	11.304	96.333	400.6	35.4388	2.35366	0.633962	722.234
845	0.036	13.7	0.098	1.486	2.32	0.253	13.9	4.22	53	18.8	87.1	18.7	182	33.2	49.1	71.7	119	570	10116	2.85	0.92	3.15	1	0.5	428.813	15.32	73.693	339.8	22.1802	3.09783	0.602521	704.116
846	0.005	10.3	0.06	0.626	0.87	0.38	7.8	3.58	54.6	26.5	157	43.2	534	134	97	472.7	4365	952	12680	5.63	3.42	5.64	1	0.5	972.921	10.991	67.23	894.7	81.403	1.6462	0.108293	757.182
847	0.261	11.1	0.107	1.016	3.13	0.127	16.6	6.24	75.8	28.7	133	28.4	266	51	203	179.3	529	894	11776	3.31	1.07	8.36	1	0.5	621.481	12.484	101.897	507.1	40.62	3.09346	0.338941	796.425
848	0.008	9.16	0.035	0.291	1.05	0.043	8.11	2.72	35	12.3	53.6	10.8	94.9	17.4	29.8	74.5	66.4	379	10440	3.53	1.19	4.33	1	0.5	245.417	9.494	46.923	189	19.9073	2.96639	1.12199	732.405
849	0.145	16.9	0.097	0.977	2.26	0.438	16.72	6.41	92.9	41.3	222	56.5	631	145	165.3	1730.6	245	1424	10834	7.6	3.72	3.71	1	0.5	1232.65	18.119	118.728	1095.8	60.478	2.04301	7.06367	718.463
850	0.005	6.68	0.023	0.119	1.13	0.195	7.05	2.3	26.5	10.3	49.1	11	108	22.3	66.2	60.1	138	320	9784	1.14	0.4	4.35	1	0.5	244.702	6.827	37.175	200.7	29.398	2.85	0.435507	732.827
851	0.26	37.1	0.18	0.89	4.4	1.13	17.7	8.25	140	69.9	438	121	1620	343	82.3	102	2646	2696	34854	238	121	7.5	1	1	2801.81	38.43	171.48	2591.9	67.4447	1.96694	0.0385488	719.418
852	0.28	26.5	0.37	0.57	2.57	0.86	10.9	4.95	89.7	45.4	293	83.9	1123	244	62.2	51.2	1928	1774	34861	170	93.3	17	1	1	1926	27.72	108.98	1789.3	64.5491	1.82208	0.026556	798.147
853	0	17	0	1.67	1.05	1.16	12.4	5.59	95.9	48.8	318	89.3	1216	287	62	50.6	2030	1906	34744	133	57.9	21.7	1	1	2093.87	18.67	116.1	1959.1	104.933	2.29706	0.0249261	824.108
854	22.1	110	9.73	56	17.1	2.01	18.2	4.98	78.1	38	250	71.2	990	224	103.1	84.8	2995	1517	37512	200	125	15.8	1	1	1891.42	197.83	120.39	1573.2	7.95228	1.6	0.0283139	790.599
855	0	29.4	0	1.44	1.1	0.45	10.2	4.46	82.2	43.2	274	76.5	1016	224	52.4	57	1565	1651	32499	146	69.7	27.1	1	1	1762.95	30.84	98.41	1633.7	52.9734	2.09469	0.0364217	848.862
856	0	32.1	0.12	0.59	3.87	1.06	13.4	6.45	111	56.4	363	99.8	1360	300	72.6	74.1	2237	2161	34736	191	94.9	8.87	1	1	2347.79	32.81	135.78	2179.2	66.4188	2.01264	0.0331247	734.602
857	0.19	5.86	0.25	10.6	34.4	12.7	175	65.8	40.8	321	1417	276	2607	435	294	546	500	516.63	18384	27.3	6.66	31.5	1	1	5401.6	16.9	328.7	5056	299.172	4.0991	1.092	866.265
858	0.17	28.5	0.066	0	1.35	0.94	13.2	6.13	109	55.6	361	101	1360	302	74.5	68.5	2424	2164	35819	203	102	18.2	1	1	2338.96	28.736	130.62	2179.6	75.8491	1.9902	0.0282591	805.277
859	0.52	268	0.025	2.3	14.7	4.41	76.6	29.1	404	172	881	188	1971	355	261	503	457	5615	22332	23.9	4.88	28.6	1	1	4366.65	270.845	528.81	3567	13.1699	4.89754	1.10066	855.032
860	12.1	5.86	4.3	27.8	27.8	8.99	125	43.8	40.8	258	1312	278	2873	41.89	283	520	430	516.63	21372	23.5	3.56	9.38	1	1	5059.34	50.06	246.39	4762.89	95.1436	6.60112	1.2093	739.765
861	1.83	262	0.68	10	24.6	7.38	113	43.3	584	237	1185	249	2577	458	262	501	495	7695	22652	24.6	4.31	14	1	1	5752.79	274.51	772.28	4706	17.1433	5.70766	1.01212	778.358
862	0.3	18.4	0.034	0	0.77	0.27	7.29	3.7	65.5	33.4	232	63.8	891	202	47.9	57	1485	1347	33908	85.9	36.2	13.5	1	1	1518.46	18.734	77.53	1422.2	75.9154	2.37293	0.0383838	774.733
863	0.33	5.86	0.14	4.05	16	5.03	84.5	32	463	196	1006	218	2280	412	332	653	600	6501	22302	36.2	6.74	22.1	1	1	4722.91	10.38	600.53	4112	396.146	5.37092	1.08833	826.101
864	0	26.3	0.2	0.53	0	1.06	12.4	5.49	88.5	46.3	290	80.9	1079	244	50.9	75.9	1616	1734	33454	121	58.3	16.9	1	1	1874.68	27.03	107.45	1740.2	64.3803	2.07547	0.0469678	797.535
865	20	5.86	8.28	54.7	31.6	8.24	120	41.8	548	215	1041	210	2133	380	175	325	366	6665	22271	28.3	5.84	26.5	1	1	4817.48	88.84	749.64	3979	44.7884	4.84589	0.887978	846.317
866	0.33	35.7	0	2.35	3.55	1.48	13.6	5.83	91.3	46.7	297	84.5	1117	253	91.2	97.7	2420	1771	34809	177	99.1	11	1	1	1952.34	38.38	115.76	1798.2	46.8525	1.78607	0.0403719	754.774
867	0.12	43.4	0.14	2.4	3.38	1.27	16.5	7.59	127	65.2	416	114	1487	312	73	78.3	2365	2486	34255	231	119	27.5	1	1	2596	46.06	155.74	2394.2	51.98	1.94118	0.0331078	850.533
868	0.095	43.6	0.22	0	0.7	0.78	15.7	7.49	119	58.9	377	103	1380	297	76.7	89.7	2516	2278	35247	216	106	19	1	1	2403.49	43.915	143.67	2215.9	50.4588	2.03774	0.0356518	809.822
869	0.062	22.5	0	0.4	1.38	0.69	7.79	3.81	61	33.7	223	65.5	924	216	66.1	92	1962	1361	37573	89.7	37	6.77	1	1	1559.83	22.962	74.67	1462.2	63.6791	2.42432	0.0468909	710.374
870	0.25	39	0	1.61	2.93	1.04	12.4	5.61	93.4	46.4	310	87.7	1195	267	85.6	69.6	2689	1836	37305	202	107	9.64	1	1	2062.34	40.86	115.38	1906.1	46.6495	1.88785	0.0258832	742.31
871	0.34	33.6	0	0.68	0	0.73	9.16	4.43	83.5	41	282	78.1	1055	237	73.6	61.9	2445	1632	37101	171	84.6	12.3	1	1	1825.54	34.62	97.82	1693.1	48.9053	2.02128	0.025317	765.565
872	0.32	30.9	0.038	0	0.71	0.86	10.7	5.51	87.1	46	291	81.2	1123	250	69.6	70.5	1993	1747	34135	155	77.7	27.2	1	1	1927.34	31.258	104.88	1791.2	57.3037	1.99485	0.0353738	849.281
873	0.12	37.9	0	0.72	1.58	0.8	13.7	6.29	98.4	51.7	325	89.7	1234	276	87.3	73.4	2529	1950	36477	185	97.5	13.9	1	1	2135.91	38.74	120.77	1976.4	51.017	1.89744	0.0290233	777.641
874	0.072	37.4	0	0	1.33	0.9	11.1	4.9	82.9	42.4	284	77.5	1045	232	64.7	63.1	2027	1679	35914	159	88.8	14.8	1	1	1819.5	37.472	101.13	1680.9	44.8575	1.79054	0.0311297	783.947
875	9.75	5.86	4.21	33.4	35.5	10.2	160	54.6	40.8	255	1157	228	2221	383	264	486	406	7704	22171	21.6	4.67	15.4	1	1	4598.32	53.22	301.1	4244	79.7445	4.62527	1.19704	787.98
876	3.59	18.6	0.88	1.35	14.9	8.59	90.5	193	406	16.42	1386	20.06	3449	41.89	87.9	472	4149	1488	13092	9.23	8.35	8.98	1	1	5650.78	24.42	712.99	4913.37	201.203	1.10539	0.113762	735.736
877	0.133	28.4	0.842	2.84	16.4	25.1	75.9	160	308	16.42	939	20.06	2129	41.89	18.3	79.8	265	975	8600	2.66	1.04	8.93	1	1	3763.99	32.215	585.4	3146.37	97.6679	2.55769	0.301132	735.222
878	0.094	22.5	0.02	0.71	1.49	0.17	9.45	4.19	52.3	20.4	97	19.7	190	37.3	191	260	394	619	10888	3.5	1.47	8.64	1	1	455.324	23.324	67.6	364.4	15.6234	2.38095	0.659898	732.194
879	0.011	3.42	0.02	0.55	0.87	0.33	10.3	4.63	73.3	36.6	217	58.4	686	157	116	172	5601	1310	9668	6.17	2.85	7.21	1	1	1248.43	4.001	89.43	1155	288.678	2.16491	0.0307088	715.916
880	0	11	0	0.42	2.66	0.47	15.1	5.53	69.6	28.5	137	29.4	292	58.7	220	146	442	862	8608	2.13	1.6	7.05	1	1	650.38	11.42	93.36	545.6	47.7758	1.33125	0.330317	713.933
881	0.032	15.8	0.026	0.55	2.84	0.23	21.06	8.32	110.2	44.6	216	46.6	436	85.7	409	356	697	1097	10891	5.91	2.93	9	1	1	987.958	16.408	142.65	828.9	50.518	2.01706	0.51076	735.941
882	0.029	6.84	0.029	0.13	0.38	0.13	5.24	2.2	30.5	13.5	67.2	15.8	158	32.2	177	104	434	436	11439	2.83	2.34	25.79	1	1	332.178	7.028	38.45	286.7	40.794	1.2094	0.239631	843.246
883	0.061	8.36	0.105	1.09	0.7	0.16	3.53	1.28	17.9	8.1	44.1	11.2	130	28.3	255	103	547	285	11140	1.39	1.69	15.03	1	1	254.886	9.616	23.57	221.7	23.0553	0.822485	0.1883	785.508
884	0.081	10.6	0.044	0.25	1.03	0.28	5.91	2.21	31.1	11.8	56.5	12.3	123	24.2	148	119	335	365	9443	1.85	0.84	7.56	1	1	279.305	10.975	40.53	227.8	20.7563	2.20238	0.355224	720.129
885	0.11	7	0.037	0.515	0.646	0.24	5.72	3.06	46.3	22.7	136	38.1	460	118	128	307	245	821	16243	4.01	1.67	6.29	1	1	838.428	7.662	55.966	774.8	101.122	2.4012	1.25306	703.979
886	0.406	11.6	0.33	1.55	1.72	0.489	7.28	3.13	43.7	19.5	111	30	366	93.3	104	704	4903	712	12409	2.82	1.4	14.6	1	1	690.005	13.886	56.319	619.8	44.6349	2.01429	0.143586	782.573
887	0.02	8.21	0.036	0.342	1.34	0.344	10.9	4	62	28.3	161	42.9	505	120	87.5	558	3950	1015	12224	5.28	2.41	7.17	1	1	944.392	8.608	78.584	857.2	99.5818	2.19087	0.141266	715.424
888	0.023	11.5	0.043	0.72	1.26	0.324	9.07	3.76	54.8	25.8	147	40.3	463	116	12	791.6	5481	905	12293	5.35	3.12	7.32	1	1	873.6	12.286	69.214	792.1	64.4718	1.71474	0.144426	717.258
889	0.261	11.1	0.107	1.016	3.13	0.127	16.6	6.24	75.8	28.7	133	28.4	266	51	203	179.3	529	894	11776	3.31	1.07	8.36	1	1	621.481	12.484	101.897	507.1	40.62	3.09346	0.338941	729.19
890	0.067	48.4	0.212	4.03	9.57	1.11	64.6	24.7	308	117	493	99	862	137	44.9	214	308	3062	7508	12.4	2.82	7.14	1	0.5	2168.69	52.709	407.98	1708	32.4043	4.39716	0.694805	780.343
891	0	60.1	0.301	5.21	12.9	0.886	78.4	29	366	140	600	122	1098	178	62.8	323	474	3593	7717	18.3	4.65	6.82	1	0.5	2690.8	65.611	487.186	2138	32.586	3.93548	0.681435	775.758
892	0	28.1	0.132	2.31	4.68	0.442	34.5	12.6	164	63.8	276	58	534	91.2	25.3	104	179	1588	9118	4.89	1.58	3.01	1	0.5	1269.76	30.542	216.222	1023	33.4949	3.09494	0.581006	700.204
893	1.5	25	0.704	5.17	5.37	0.783	24.2	8.74	107	40.9	182	40.6	389	67.9	16.3	71.4	121	1025	8073	3.35	1.11	4.04	1	0.5	898.867	32.374	146.093	720.4	22.2524	3.01802	0.590083	726.103
894	0	66	0.152	4.08	10.6	1.23	74.3	27.7	354	132	556	114	999	151	73.3	340	477	3137	7293	18.2	4.66	6.11	1	0.5	2490.06	70.232	467.83	1952	27.7936	3.90558	0.712788	764.928
895	0.186	44.7	0.323	5.01	11.5	1.05	68.8	26.1	343	133	572	124	1148	175	65.9	312	601	3073	7960	15.7	3.44	10.9	1	0.5	2652.67	50.219	450.45	2152	42.8523	4.56395	0.519135	824.609
896	0.065	38.4	0.12	1.8	5.78	0.133	37.2	15.6	214	86.1	398	92.9	907	144	92.4	426	621	2094	11619	14	5.2	3.75	1	0.5	1941.1	40.385	272.713	1628	40.312	2.69231	0.68599	719.418
897	0	12.2	0.028	0.321	0.446	0.231	8.07	2.81	40.4	17.2	88.4	21	231	51.4	16.3	39.2	246	535	11040	7.07	4.45	3.15	1	0.5	473.506	12.549	51.957	409	32.5922	1.58876	0.15935	704.116
898	0.059	23.2	0.081	1.41	3.31	0.323	23.8	8.21	104	41.5	191	41.2	393	73.3	16.9	83.9	217	1209	10125	8.39	3.08	7.3	1	0.5	904.393	24.75	139.643	740	29.899	2.72403	0.386636	782.573
899	0.581	42.2	0.396	4.43	7.55	0.598	47.6	17	212	82.7	356	70	620	110	34.3	140	218	2310	8482	10.3	2.63	3.43	1	0.5	1571.06	47.607	284.748	1238.7	26.0193	3.91635	0.642202	711.531
900	0.12	35.4	0.132	3.09	5.87	0.591	36.9	12.6	162	63.2	278	56.3	500	92.6	28.9	137	169	1796	8419	7	1.82	4.32	1	0.5	1246.8	38.742	217.961	990.1	25.5562	3.84615	0.810651	732.194
901	0.115	65.8	0.244	3.95	9.7	1.2	69.7	26.2	333	126	528	102	865	152	65.1	339	439	3510	7124	20.7	4.41	7.96	1	0.5	2282.91	70.109	439.8	1773	25.2892	4.69388	0.77221	791.374
902	0.045	8.95	0.105	0.75	0	0.179	5.36	3.51	66.1	35.4	215	59.6	690	150	134	170	2715	1258	15608	39.4	64.3	5.7	1	0.5	1235	9.85	75.149	1150	116.751	0.612753	0.0626151	758.2
903	0.11	8.13	0.056	0.242	0.892	0.218	2.89	1.32	22.4	10.7	64.9	19.5	239	57.9	451	75.1	1258	390	13462	4.19	9.85	8.21	1	0.5	428.258	8.538	27.72	392	45.9124	0.425381	0.0596979	794.554
904	0	63.1	0.49	8.62	10.2	6.02	63.8	19.6	232	88.2	403	84.4	787	164	24.5	234	119	2636	7963	2.79	0.398	7.2	1	0.5	1930.43	72.21	331.62	1526.6	21.1411	7.01005	1.96639	781.184
905	0.316	25.4	0.441	2.94	7.32	0.83	48.4	16.7	207	78.8	340	66.9	567	105	31.1	141	198	2227	8301	7.1	1.5	3.88	1	0.5	1467.05	29.097	280.25	1157.7	39.7876	4.73333	0.712121	722.466
906	0.354	199	0.796	10.2	22.3	3.69	98.4	38.6	459	162	684	136	1137	184	145	324	1221	2334	10111	110	48.8	16.3	1	0.5	3135.34	210.35	621.99	2303	10.9484	2.2541	0.265356	870.311
907	0.359	34.4	0.204	1.48	2.07	0.43	10.4	4.41	76.5	35.4	200	51.2	542	118	52.7	87.6	874	1134	12309	136	63.7	4.71	1	0.5	1076.85	36.443	93.81	946.6	25.9748	2.13501	0.100229	740.16
908	0.349	22.7	0.158	3.59	6.19	0.768	37.8	13.9	170	66.4	295	58.7	508	92.9	24	125	197	1893	8889	8.14	1.68	3.62	1	0.5	1276.45	26.797	228.658	1021	38.1013	4.84524	0.634518	716.283
909	3.56	64.9	1.98	10.5	7.76	0.563	21.6	9.88	146	64.1	369	100	1054	185	105	336	829	1837	12718	65	64.3	13.8	1	0.5	2038.84	80.94	185.803	1772.1	21.894	1.01089	0.405308	850.948
910	0.367	5.86	0.292	1.44	1.74	0.397	9.5	4.86	74.4	35.6	203	52.7	564	118	38.1	199	515	1149	11755	99.2	69.7	5.02	1	0.5	1072.16	7.959	90.897	973.3	122.289	1.42324	0.386408	746.117
911	0.092	96.7	0.087	0.828	1.5	0.022	11.9	7.53	112	54.4	303	75.6	781	153	59.6	290	642	1744	12671	103	87.6	5.06	1	0.5	1597.66	97.707	132.952	1367	13.9908	1.1758	0.451713	746.864
912	0.184	17	0.297	2.95	5.22	0.481	40.1	14.1	173	66.2	293	59	530	104	31.5	113	421	1883	8924	15.3	3.74	3.5	1	0.5	1305.53	20.431	232.901	1052.2	51.5002	4.09091	0.268409	713.306
913	0.874	173	1.13	9.19	8.52	0.926	17.9	7.73	101	41.3	221	53.4	548	108	43.9	261	400	1403	12382	93.1	124	8.95	1	0.5	1291.97	184.194	136.076	971.7	5.27542	0.750806	0.6525	803.531
914	0.238	41.4	0.115	0.125	0.422	0.05	3.17	2.46	45.8	26.5	170	46.8	538	125	25.7	49.3	646	962	13784	144	96.4	6.89	1	0.5	1000.08	41.878	51.902	906.3	21.6414	1.49378	0.0763158	776.776
915	3.39	24.3	2.64	24.6	20.7	2.42	76	21.4	233	83	330	67.1	585	93.3	28.2	164	239	2450	7144	7.54	1.55	3.05	1	0.5	1566.85	54.93	353.52	1158.4	21.0887	4.86452	0.686192	701.337
916	0.398	36.6	0.421	3.35	4.77	0.644	20.5	7.03	97	41.6	216	54.3	572	96.7	74.8	158	998	1081	9569	87.3	52.8	6.98	1	0.5	1151.31	40.769	129.944	980.6	24.0526	1.65341	0.158317	778.072
917	2.43	58.7	2.18	22.1	21.3	3.87	83.4	24.7	273	90.5	364	73.7	662	102	199	686	441	2575	8140	11.3	2.61	7.1	1	0.5	1783.88	85.41	406.27	1292.2	15.1294	4.3295	1.55556	779.779
918	0.384	152	0.368	3.05	2.51	0.396	17	7.42	106	47	234	58.2	608	97	42.6	270	369	1511	9700	97.5	112	5.83	1	0.5	1333.33	155.802	133.326	1044.2	6.7021	0.870536	0.731707	760.375
919	0.017	40.8	0.196	3.56	7.51	0.701	47.7	17.8	217	80.5	339	68.9	634	95.9	39	180	241	2182	6973	10.6	2.11	4.34	1	0.5	1553.58	44.573	290.711	1218.3	27.3327	5.0237	0.746888	732.616
920	0.027	29.6	0.235	4.67	8.44	0.994	54.8	18.5	230	83.5	349	71.7	640	92.6	36.8	145	220	2256	6774	8.31	1.8	3.06	1	0.5	1584.07	34.532	312.734	1236.8	35.8161	4.61667	0.659091	701.618
921	0.105	177	0.049	0.512	0.654	0.095	7.44	3.57	55.6	27.2	150	40.7	448	82.6	31.1	144	405	907	10125	96.1	76.6	3.47	1	0.5	993.525	177.666	67.359	748.5	4.21296	1.25457	0.355556	712.549
922	0.024	25	0.253	3.33	6.56	0.743	44.7	15.3	196	75.2	326	72.6	681	104	35.6	142	241	2171	7718	8.17	1.87	4.78	1	0.5	1550.71	28.607	263.303	1258.8	44.0032	4.36898	0.589212	741.533
923	10.3	83.7	7.12	52.8	46.2	19.6	150	36.7	412	129	426	74.2	622	87.3	170	423	1276	3768	8215	3.5	0.371	11.7	1	0.5	2156.92	153.92	664.5	1338.5	8.69608	9.43396	0.331505	832.386
924	2.75	49.6	1.02	7.42	5.14	0.388	19.2	8.2	149	83.1	573	186	2175	363	171	376	1916	1810	8136	51.4	48	15	1	0.5	3622.82	60.79	181.928	3380.1	55.6029	1.07083	0.196242	860.562
925	0.152	24.7	0.315	5.19	10.7	0.968	70.7	23.4	281	102	422	83.3	734	117	47.5	141	517	2731	6492	13.8	8.49	3.41	1	0.5	1875.42	30.357	386.768	1458.3	48.0383	1.62544	0.272727	711.018
926	0.1	5.86	0.172	1.43	2.3	0.304	13.7	5.87	88	39	198	48.7	510	91.3	44.3	159	349	882	9006	71	62.7	4.61	1	0.5	1004.74	7.562	110.174	887	117.297	1.13238	0.455587	738.171
927	0.253	76.7	0.679	10.2	24.1	2.15	140	43.9	504	178	712	145	1293	197	88.5	508	688	4767	6580	25.9	4.38	14.2	1	0.5	3326.98	87.832	714.15	2525	28.7481	5.91324	0.738372	854.224
928	12.4	55.1	8.05	34.7	19.8	2.31	49.5	14.6	166	57.9	248	55.7	544	84.4	202	461	464	1723	8383	17.8	3.47	11.7	1	0.5	1352.46	110.25	252.21	990	8.97959	5.12968	0.993534	832.386
929	0	42.3	0.114	2.14	3.24	1.54	19.8	6.84	84.3	35.9	169	36.9	349	74.1	21.8	165	107	1040	8452	1.89	0.466	6	1	0.5	825.174	44.554	115.72	664.9	14.9235	4.05579	1.54206	763.16
930	0.022	67.7	0.025	1.26	3.41	1.08	21.4	8.98	114	48.2	240	52.5	523	106	37.7	215	215	1477	9456	5.84	1.38	3.68	1	0.5	1187.58	69.007	148.87	969.7	14.0522	4.23188	1	717.742
931	1.11	82.6	0.251	2.4	4.82	1.08	33.6	14	188	78.9	402	89.8	870	175	67.4	290	416	2387	10902	12.9	3.5	7.24	1	0.5	1943.56	86.361	241.5	1615.7	18.7087	3.68571	0.697115	781.741
932	0.042	18.7	0.028	0.358	1.12	0.179	6.11	2.33	33.5	15	77.4	18.2	193	40	9.9	31.4	66	462	10483	2.51	0.941	3.22	1	0.5	405.967	19.128	43.239	343.6	17.9632	2.66738	0.475758	706.019
933	0	30.5	0.139	2.48	4.47	2.04	20.3	7.43	85.2	33.8	161	33.3	323	66	9.89	67.3	58	993	6855	1.41	0.431	6.54	1	0.5	769.659	33.119	119.44	617.1	18.6328	3.27146	1.16034	771.602
934	0	17.2	0.056	0.729	2.37	0.819	9.92	4.21	49.7	21.5	110	25.3	265	54.4	7.9	31.5	49	669	8950	1.26	0.367	5.53	1	0.5	561.204	17.985	67.019	476.2	26.4776	3.43324	0.642857	755.294
935	1.2	29.6	0.836	8.33	9.72	4.44	40.4	12	139	52.7	240	50.7	493	95.2	12.6	91.2	71.4	1525	7996	1.17	0.327	4.81	1	0.5	1177.13	39.966	205.56	931.6	23.3098	3.57798	1.27731	742.116
936	0.121	44.2	0.29	5.6	8.54	3.96	44.8	13.4	159	62.1	286	60.2	578	117	14.3	130	75.5	1835	7471	1.7	0.411	5.45	1	0.5	1383.21	50.211	229.7	1103.3	21.9733	4.13625	1.72185	753.901
937	0.014	22.1	0.067	1.03	3.52	1.22	20.9	7.56	96.2	39.8	200	46.3	468	99.3	12.4	60.2	70.4	1226	8818	1	0.447	6.1	1	0.5	1006.01	23.211	129.4	853.4	36.7671	2.23714	0.855114	764.769
938	0	59.1	0.02	1.05	3.28	0.604	26.9	11.5	154	63.4	304	67.1	644	128	58.4	267	342	1874	11599	10.1	2.37	3.36	1	0.5	1462.95	60.17	196.284	1206.5	20.0515	4.2616	0.780702	709.725
939	0.042	21.8	0.249	4.58	6.84	3.6	33.8	10.5	126	47.9	227	48.4	470	91.4	9.03	92.2	78.5	1422	7161	3.77	0.407	7.38	1	0.5	1092.11	26.671	180.74	884.7	33.1709	9.2629	1.17452	783.673
940	0	7.03	0.009	0.403	0.346	0.411	1.98	1.2	15.5	6.86	33.3	8.01	88	19.1	3.08	22.8	36.1	211	10823	0.625	0.196	5.71	1	0.5	182.149	7.442	19.437	155.27	20.864	3.18878	0.631579	758.368
941	2.19	46	1.05	8.33	5.12	1.53	19.3	6.51	82.7	33.5	165	37.2	367	71.4	20.3	95.5	120	1013	10107	3.35	0.935	3.61	1	0.5	846.83	57.57	115.16	674.1	11.7092	3.58289	0.795833	716.038
942	0.047	92.1	0.137	1.93	5.12	1.06	33.3	13.6	183	77	365	82.8	778	147	97.3	626	523	2346	10854	12.4	3.31	6.08	1	0.5	1780.09	94.214	236.08	1449.8	15.3884	3.74622	1.19694	764.449
943	0.008	50.1	0.184	3.65	6.85	3.06	36.3	11.7	143	57.7	270	58	562	112	17.6	133	91.3	1679	7857	2.69	0.505	4.66	1	0.5	1314.55	53.942	200.91	1059.7	19.6452	5.32673	1.45674	739.17
944	0.027	7.07	0	0.373	0.596	0.061	5.47	2.4	37.6	16.7	89.8	21.7	224	49.2	14.6	45.8	111	526	12970	4.1	1.58	3.59	1	0.5	454.997	7.47	46.127	401.4	53.7349	2.59494	0.412613	715.547
945	0.281	24.3	0.208	2.32	5.38	0.515	37.8	15.8	224	97.4	480	107	1014	208	94.7	443	686	2985	12324	19.1	5	6.13	1	0.5	2217	27.109	283.495	1906.4	70.3235	3.82	0.645773	765.247
946	0.021	17	0.123	1.51	2.48	0.664	16.2	6.02	78.8	34.7	177	42	423	93.7	13.8	57.2	98.7	1086	10185	3.3	1.06	3.94	1	0.5	893.218	18.654	104.164	770.4	41.2995	3.11321	0.579534	723.844
947	0	24	0.137	2.68	4.8	1.33	27.7	9.73	124	51.5	251	56.3	557	118	15	84.3	99.6	1566	10366	3.19	0.98	3.91	1	0.5	1228.18	26.817	167.56	1033.8	38.5502	3.2551	0.846386	723.157
948	0.13	24	0.089	1.75	4.01	1.17	21.8	8.12	109	46.4	227	51.1	500	106	10.9	69.8	80.6	1410	7739	3.61	0.723	4.82	1	0.5	1100.57	25.969	144.1	930.5	35.8312	4.99308	0.866005	742.31
949	0	21.7	0.017	1.48	2.23	0.799	15.5	5.7	73.4	30.3	149	33.3	329	68.3	13.8	81.9	85	916	10536	2.49	0.864	5.69	1	0.5	730.726	23.197	97.629	609.9	26.2922	2.88194	0.963529	758.031
950	0.054	26.2	0.085	0.615	2.78	0.534	21	8.54	118	51.6	255	57.8	563	116	44.2	241	337	1577	11640	13.9	3.67	16.5	1	0.5	1221.21	26.954	150.854	1043.4	38.7104	3.78747	0.715134	871.755
951	0.038	15.6	0	0.908	1.68	0.17	13.2	7.02	109	52.2	284	70.1	722	155	49.4	147	381	1663	13862	22.9	6.79	4.14	1	0.5	1430.92	16.546	131.07	1283.3	77.5595	3.37261	0.385827	728.317
952	0.206	16.6	0.044	0.518	1.17	0.238	14.4	6.57	102	48.3	261	63.7	659	139	48.5	148	371	1506	13342	21.1	5.95	5.58	1	0.5	1312.75	17.368	124.378	1171	67.4228	3.54622	0.398922	756.156
953	0	21.1	0.105	0.912	2.52	0.462	13.8	5.64	78.1	34.6	179	42.2	435	92.8	17.4	74.6	118	1089	8895	3.44	0.988	4.86	1	0.5	906.239	22.117	100.522	783.6	35.4298	3.48178	0.632203	743.081
954	0	24.1	0.004	1.59	3	0.768	15.6	5.28	69	28.7	139	31.2	310	62.1	8.82	45.2	55.3	863	10125	1.81	0.59	6.91	1	0.5	690.342	25.694	93.648	571	22.2231	3.0678	0.81736	777.065
955	0.081	12.6	0.015	0.896	1.43	0.355	6.34	2.42	32.4	14.5	73.2	17.6	181	39.5	4.49	20.5	53.3	446	9969	1.69	0.545	5.18	1	0.5	382.337	13.592	42.945	325.8	23.97	3.10092	0.384615	749.075
956	0.82	21.6	0.231	1.24	1.1	0.35	6.29	2.94	47.1	22.6	155	38	438	105	46.7	184	1403	778	14658	56.5	21.4	6.52	1	0.5	840.271	23.891	57.78	758.6	31.7525	2.64019	0.131148	771.3
957	0.526	13.5	0.244	1.3	0.539	0.251	3.84	1.94	37.2	20.7	161	42.4	537	154	67.6	40.9	2225	802	15800	145	43.8	5.49	1	0.5	974.44	15.57	43.77	915.1	58.7733	3.3105	0.018382	754.6
958	0.557	14.1	0.309	1.92	0.785	0.418	5.44	2.8	51.6	28.4	212	54.2	669	186	94.5	66.4	3432	1094	15346	210	57.4	6.81	1	0.5	1227.53	16.886	61.043	1149.6	68.0801	3.65854	0.0193473	775.612
959	0.278	16.8	0.112	1.43	2.45	0.499	15.2	5.74	73.5	29.8	160	30.5	297	62.4	12.3	59.5	314	907	10730	21.1	7.35	5.4	1	0.5	695.709	18.62	97.389	579.7	31.1332	2.87075	0.18949	753.022
960	0.899	17.6	0.216	0.861	0.769	0.156	4.56	2.4	44.4	24	181	47.8	621	168	37.9	77.3	1374	876	15617	186	108	10.4	1	0.5	1113.66	19.576	52.285	1041.8	53.2182	1.72222	0.0562591	819.513
961	1.42	16.2	0.646	2.85	2.61	0.597	12.3	5.96	99.6	50.9	367	100	1294	321	41.5	213	1460	1720	16246	161	155	16.8	1	0.5	2275.08	21.116	121.067	2132.9	101.009	1.03871	0.14589	873.896
962	21	68.1	7.24	31.3	8.27	0.619	20	7.1	110	53.8	401	111	1412	347	63.6	201	2268	1765	19288	179	202	12.8	1	0.5	2598.43	127.64	145.989	2324.8	18.2137	0.886139	0.0886243	842.413
963	0.85	9.92	0.237	1.17	1.41	0.602	6.98	2.76	38.3	16.9	105	22.4	261	62.4	3.92	49.8	133	535	10072	1.28	0.377	12.2	1	0.5	529.929	12.177	50.052	467.7	38.4085	3.39523	0.374436	837.033
964	0.038	17.9	0.041	0.395	0.762	0.178	9.27	4.99	80.2	37.1	251	56.8	647	152	13.2	64.8	555	1246	13411	112	56.8	6.3	1	0.5	1257.67	18.374	95.4	1143.9	62.2564	1.97183	0.116757	767.923
965	0.078	27.5	0.04	0.475	2.42	0.292	15.6	7.13	110	44.6	266	53.9	558	118	2.7	59.7	99	1349	12010	6.69	0.753	3.8	1	0.5	1204.04	28.093	135.442	1040.5	37.0377	8.88446	0.60303	720.6
966	0.852	53.9	0.753	7.03	11.4	2	43.7	14.6	177	66	369	72.2	754	170	30.2	205	656	1820	9594	136	58.1	9.88	1	0.5	1742.43	62.535	248.7	1431.2	22.8864	2.34079	0.3125	814
967	0.345	65	0.528	7.79	15.4	2.75	69.7	23	271	93.9	472	83.3	779	153	28.9	241	393	2396	10077	145	77.1	13.9	1	0.5	2036.71	73.663	381.85	1581.2	21.4653	1.88067	0.613232	851.774
968	0.305	55.1	0.323	4	9.2	1.5	42.4	15.3	192	74.4	414	82.5	847	179	29.9	245	510	2165	10479	214	110	8.32	1	0.5	1917.03	59.728	260.4	1596.9	26.7362	1.94545	0.480392	795.929
969	0.013	1.86	0.017	0.061	0.144	0.068	2.41	1.37	28.4	15.8	125	32.5	431	121	16.8	9.87	538	581	10740	11.1	6.8	3.62	1	0.5	759.643	1.951	32.392	725.3	371.758	1.63235	0.0183457	716.283
970	1.18	16.7	0.287	1.28	0.43	0.206	5.26	2.61	47.4	24.9	187	46.6	579	142	17.9	27.8	539	892	10096	230	154	9.22	1	0.5	1054.85	19.447	55.906	979.5	50.3677	1.49351	0.051577	806.657
971	0.546	99.9	0.409	5.81	14.7	2.46	70	22.2	254	89.4	446	79.5	744	149	49.8	669.2	631	2413	9465	135	73	15.5	1	0.5	1977.92	106.665	363.36	1507.9	14.1368	1.84932	1.06054	864.388
972	0.031	7.18	0.009	0.174	0.295	0.078	3.49	1.98	42.7	24.6	201	54.5	694	185	30.9	17.5	942	882	10647	60.4	20.3	3.06	1	0.5	1215.04	7.394	48.543	1159.1	156.762	2.97537	0.0185775	701.618
973	0.145	16.3	0.157	1.51	2.64	0.404	14	5.89	90.4	39.6	229	54.1	590	137	105	231	810	1278	13166	12.3	6.61	4.8	1	0.5	1181.15	18.112	113.334	1049.7	57.9561	1.86082	0.285185	741.922
974	0.011	2.53	0.056	0.169	0.402	0.425	3.98	1.05	7.98	1.78	5.57	0.775	7.11	1.17	7.78	2.89	242	54.3	11836	0.152	0.041	3.32	1	0.5	33.008	2.766	13.837	16.405	5.93095	3.70732	0.0119421	708.68
975	2.19	69.9	0.548	3.59	4.28	1.69	21.3	6.86	85.6	33.1	179	40.4	445	103	21.7	977	865	1151	10899	4.36	1.03	8.17	1	0.5	996.458	76.228	119.73	800.5	10.5014	4.23301	1.12948	794.051
976	0.815	43.7	0.219	1.56	1.43	0.92	11.2	3.84	52.1	22.4	127	30.3	344	82.3	9.25	272	377	777	9400	2.83	0.63	4.58	1	0.5	721.784	46.294	69.49	606	13.0902	4.49206	0.721485	737.567
977	0.763	26.3	0.215	1.51	1.88	0.824	8.33	3.06	39.3	16.1	91.9	22.3	253	61.8	7.68	163	252	562	10229	1.24	0.428	3.97	1	0.5	527.282	28.788	53.394	445.1	15.4613	2.8972	0.646825	724.526
978	8.79	55.3	1.91	9.02	3.62	1.26	14.4	4.5	60	23.5	137	29.1	314	72.6	8.08	237	313	775	9718	2.37	0.629	4.07	1	0.5	735	75.02	83.78	576.2	7.68062	3.76789	0.757188	726.772
979	0.122	58.8	0.065	1.38	3.19	1.39	16.2	5.92	78.8	30.7	180	37	394	87.1	11.1	359	414	1019	9484	4.08	0.889	6.08	1	0.5	894.667	60.367	105.5	728.8	12.0728	4.58943	0.86715	764.449
980	0.353	47.4	0.112	1.82	2.15	1.17	13.2	4.22	56.6	22.8	135	28.8	314	73.4	10.8	390	426	759	10064	2.75	0.701	5.24	1	0.5	701.025	49.685	77.34	574	11.5528	3.92297	0.915493	750.165
981	0	49.8	0.09	1.86	4.6	0.11	53.9	21.8	293	123	613	117	1056	188	114	451	735	3668	10868	17.1	3.96	11.9	1	1	2522.16	51.75	373.41	2097	40.5217	4.31818	0.613605	762.347
982	0.04	26.5	0.04	0.45	2.64	0.42	18.3	8	106	46.6	246	52.5	523	108	55.4	181	931	1471	12836	4.24	1.21	15.6	1	1	1138.49	27.03	135.36	976.1	36.1117	3.50413	0.194415	789.296
983	2.13	42	0.53	4.02	4.68	0.17	38.5	13.8	192	78.9	395	83	750	146	64.2	320	518	2414	11243	16.8	4.94	15.7	1	1	1750.73	48.68	249.15	1452.9	29.8459	3.40081	0.617761	789.949
984	0.32	73	0.14	2.79	5.5	1.19	40	12.9	170	67.1	341	70.1	650	127	51	383	316	2082	10201	6.78	1.93	6.83	1	1	1561.04	76.25	229.59	1255.2	16.4616	3.51295	1.21203	711.147
985	0.05	42.8	0	0.86	3.79	0.65	26.6	11.8	148	62.7	309	67.9	664	128	59.2	221	639	1915	12026	4.77	1.02	11.3	1	1	1466.15	43.71	190.84	1231.6	28.1766	4.67647	0.345853	757.353
986	0.34	16.7	0.66	5.86	6.55	0.67	29.8	8.9	99.8	39	187	38.6	390	80.4	11	71	64	1167	6601	0.73	0.21	9.49	1	1	904.28	23.56	145.72	735	31.1969	3.47619	1.10938	740.849
987	0.42	23.5	0.14	2.34	3.99	0.09	28.5	10.1	129	50.7	249	50.2	444	84.3	25.6	115	172	1507	9490	6.1	2.24	7.87	1	1	1076.28	26.4	171.68	878.2	33.2652	2.72321	0.668605	723.73
988	0.02	22.7	0.19	5.1	9.95	0.18	67.9	22.3	289	114	560	109	950	176	59.3	301	375	3437	9809	5.83	1.89	7.02	1	1	2326.34	28.01	389.33	1909	68.1542	3.08466	0.802667	713.558
989	0.02	4.5	0.02	0.5	0.47	0.32	4.43	1.35	20.3	9.06	54.2	13.4	154	37.9	32.6	30.1	869	326	14051	2.31	0.77	6.37	1	1	300.47	5.04	26.87	268.56	53.2857	3	0.0346375	705.072
990	0	3	0	0	0.15	0.06	1.86	0.77	11.6	6.97	45.6	11.8	164	42.1	57.6	23.4	1477	279	13028	3.11	0.91	11.1	1	1	287.91	3	14.44	270.47	90.1567	3.41758	0.0158429	755.64
991	0.04	15.3	0.26	0.63	1.25	0.34	5.32	1.58	18.9	8.36	58.4	16.4	209	58	66.9	36.4	1875	356	15178	16.5	5.53	31.5	1	1	393.78	16.23	27.39	350.16	21.5749	2.98373	0.0194133	866.265
992	0.91	6.2	0.31	1.67	0.86	0.06	4.66	1.56	29.7	15.8	114	33.2	444	119	77.4	39.3	2383	614	20280	97.9	60.8	9.05	1	1	771.93	9.09	36.84	726	79.868	1.6102	0.0164918	736.451
993	0.97	9.77	0.32	1.43	1.4	0.13	7.1	3.33	61.9	30.8	212	56.6	693	168	137	247	3652	1161	20667	129	74.2	40.1	1	1	1246.75	12.49	73.86	1160.4	92.9063	1.73854	0.0676342	895.343
994	1.09	8.24	0.71	1.83	1.29	0.12	5.83	2.43	33.4	17.7	118	33.8	439	117	120	68	3133	665	16943	57.6	24.3	25.3	1	1	780.44	11.87	43.07	725.5	61.1205	2.37037	0.0217044	841.087
995	0.71	9.9	0.33	2.3	1.97	0.17	5.99	2.26	30.9	13.4	78.7	18.1	202	46.7	45.2	75.6	1244	473	16637	4.86	1.98	11.1	1	1	413.43	13.24	41.29	358.9	27.1073	2.45455	0.0607717	755.64
996	0.54	13.2	0.25	1.85	1.6	0.06	10.6	4.63	71.7	32.8	197	48.1	554	132	97.8	130.7	2736	1092	20099	85.7	40.3	12.4	1	1	1068.33	15.84	88.59	963.9	60.8523	2.12655	0.0477705	766.356
997	0.72	35.6	0.34	1.9	1.29	0.21	4.07	1.26	18	8.46	54	15.2	186	49.1	42	24.5	1235	317	16884	3.95	1.54	6.62	1	1	376.15	38.56	24.83	312.76	8.111	2.56494	0.0198381	708.417
998	0.08	65.1	0.36	3.41	4.82	1.3	27	9.69	131	50.5	244	56.6	530	99.5	18	225	175	1531	9549	3.06	0.92	8.91	1	1	1223.36	68.95	173.81	980.6	14.2219	3.32609	1.28571	735.016
999	0.51	6.07	0.13	0.45	0.8	0.04	2.52	1.27	25.1	14	93	29.7	401	105	86	42.9	2273	518	16332	35.9	16.5	6.7	1	1	679.59	7.16	29.73	642.7	89.7626	2.17576	0.0188737	709.465
1000	0.07	7.03	0.04	0.19	0.18	0.03	2.67	1.32	21.5	11.1	76.6	24.4	338	87.5	87.7	31.5	2235	439	14634	53.8	24.9	7.53	1	1	570.63	7.33	25.7	537.6	73.3424	2.16064	0.014094	719.774
1001	0.09	75	0.07	1	4.2	0.56	29	12	154	64	300	63	600	113	24	173	161	1916	10400	6.2	1.5	3.9	1	0.5	1415.92	76.16	199.76	1140	14.9685	4.13333	1.07453	722.927
1002	0.05	104	0.34	6.1	11	3.5	52	16	178	67	288	57	499	101	14	156	58	1859	8000	1.7	0.47	5.6	1	0.5	1382.99	110.49	260.5	1012	9.1592	3.61702	2.68966	756.499
1003	0.05	14	0.03	0.25	1.1	0.23	15	8.3	129	61	302	68	627	115	38	118	272	1843	17200	50	17	3.1	1	0.5	1340.96	14.33	153.63	1173	81.8562	2.94118	0.433824	702.736
1004	0.01	65	0.07	0.71	3	0.17	18	9.1	138	65	365	91	911	194	126	693	773	2174	14100	14	4.5	14	1	0.5	1860.06	65.79	168.27	1626	24.715	3.11111	0.896507	852.595
1005	0.43	2.9	0.18	0.7	0.63	0.06	1.6	0.98	14	7.8	47	14	177	54	24	11	699	277	13400	4.7	3.3	6.3	1	0.5	321.28	4.21	17.27	299.8	71.2114	1.42424	0.0157368	767.923
1006	0.01	3.6	0	0	0.1	0.15	1.6	0.8	14	6.6	38	9.1	109	28	19	15	600	243	13900	1.8	1.8	4.9	1	0.5	210.96	3.61	16.65	190.7	52.8255	1	0.025	743.848
1007	0	11	0.04	0.07	0.67	0.13	4.4	2.2	33	15	82	20	214	48	20	47	571	523	13200	2.8	1.4	3.2	1	0.5	430.51	11.11	40.4	379	34.1134	2	0.0823117	705.479
1008	0.33	3.7	0.2	0.92	1.6	1.1	17	9.8	171	83	454	108	1068	227	29	70	1119	2669	10700	16	2.7	11	1	0.5	2145.65	5.15	200.5	1940	376.699	5.92593	0.0625559	825.606
1009	0.06	2.4	0	0.16	0.88	1.1	15	8.9	154	78	424	105	1039	224	14	24	592	2466	11000	10	1.7	10	1	0.5	2052.5	2.62	179.88	1870	713.74	5.88235	0.0405405	815.293
1010	0.05	5.5	0.06	0.38	1	1.1	19	10	165	76	389	89	846	170	39	104	1551	2448	10100	22	3.5	6.8	1	0.5	1772.09	5.99	196.1	1570	262.104	6.28571	0.0670535	775.466
1011	0	9.2	0.02	0.71	3	2.5	39	22	336	154	778	176	1699	340	64	240	2560	4757	10000	41	6.1	15	1	0.5	3559.43	9.93	402.5	3147	316.918	6.72131	0.09375	860.562
1012	1.3	111	1.1	8.6	12	4.6	46	15	147	48	205	47	465	94	42	209	427	1482	12400	5.6	2	7.2	1	0.5	1205.6	122	224.6	859	7.04098	2.8	0.489461	781.184
1013	0.01	85	0.27	4.9	8.7	2.1	45	16	193	76	349	75	725	141	38	337	192	2144	9500	3.3	1	4.1	1	0.5	1720.98	90.18	264.8	1366	15.1475	3.3	1.75521	727.437
1014	0.05	4.5	0.01	0.14	0.73	0.76	16	9.7	179	94	545	142	1559	326	29	52	1094	3027	9500	12	2.4	7.9	1	0.5	2876.89	4.7	206.19	2666	567.234	5	0.047532	790.599
1015	0.03	5	0.01	0.19	1.2	1.2	23	16	279	145	829	209	2248	458	36	72	1353	4639	9300	19	3.1	9.3	1	0.5	4214.63	5.23	320.4	3889	743.595	6.12903	0.0532151	807.569
1016	0.02	13	0.01	0.27	2.9	2.3	38	21	330	154	797	189	1911	370	107	436	3993	4788	10500	71	11	13	1	0.5	3828.5	13.3	394.2	3421	257.218	6.45455	0.109191	844.162
1017	0	4.9	0	0.1	1.1	1.1	20	13	234	121	706	184	2011	422	38	74	1438	3963	9400	15	3	6	1	0.5	3718.2	5	269.2	3444	688.8	5	0.0514604	763.16
1018	0	2.1	0.03	0.1	0.63	0.5	11	6.7	126	67	399	105	1197	257	22	35	831	2194	9800	7.4	2	4.2	1	0.5	2172.06	2.23	144.83	2025	908.072	3.7	0.0421179	729.624
1019	0.05	4.2	0.01	0.25	0.9	1.1	17	12	204	107	626	159	1733	367	27	54	997	3463	9700	13	2.5	5.7	1	0.5	3231.51	4.51	235	2992	663.415	5.2	0.0541625	758.2
1020	0.23	7.1	0.12	0.68	1.6	1.6	28	17	303	154	877	222	2398	485	38	94	1423	4942	9300	19	3	11	1	0.5	4495.33	8.13	351.2	4136	508.733	6.33333	0.0660576	825.606
1021	0	2.7	0	0	0.52	0.66	11	6.7	122	65.5	387	105	1184	254	26	46	961	2132	9600	9.2	2.6	7.5	1	0.5	2139.08	2.7	140.88	1995.5	739.074	3.53846	0.0478668	785.306
1022	0	76	0.13	2.2	5.6	2.4	36	13	167	70	344	79	794	163	18	88	106	2019	9600	5.3	1	5.4	1	0.5	1752.33	78.33	224	1450	18.5114	5.3	0.830189	753.022
1023	0.03	63	0.12	2.1	4.3	1.8	27	8.9	111	45	213	47	456	91	17	121	116	1275	9700	3.3	0.77	4.1	1	0.5	1070.25	65.25	153	852	13.0575	4.28571	1.0431	727.437
1024	0.01	84	0.15	3.3	6.6	2.4	41	15	194	81	374	82	765	150	23	180	206	2215	10800	6.6	1.3	7.7	1	0.5	1798.46	87.46	259	1452	16.6019	5.07692	0.873786	787.98
1025	0	56	0.05	0.84	2.8	0.94	20	8.1	114	50	249	56	559	113	17	74	107	1411	11400	6.3	1.5	3.2	1	0.5	1229.73	56.89	145.84	1027	18.0524	4.2	0.691589	705.479
1026	0	108	0.24	4.8	10	3.6	55	19	236	94	427	91	824	164	22	140	126	2621	9900	8.2	1.5	5.7	1	0.5	2036.64	113.04	323.6	1600	14.1543	5.46667	1.11111	758.2
1027	0	70	0.08	1.6	3.2	0.96	24	9.4	125	53	257	56	524	105	27	133	157	1535	11400	7.1	1.5	4.7	1	0.5	1229.24	71.68	162.56	995	13.8811	4.73333	0.847134	739.963
1028	0.01	31	0.03	0.96	2.1	0.76	14	4.9	68	30	152	36	365	81	18	72	115	967	10700	3	0.86	4.1	1	0.5	785.76	32	89.76	664	20.75	3.48837	0.626087	727.437
1029	0.42	86	0.4	2.5	3.4	0.61	26	11	158	69	352	82	810	170	72	307	731	2157	12500	25	4.7	17	1	0.5	1771.33	89.32	199.01	1483	16.6032	5.31915	0.419973	875.307
1030	0.04	76	0.11	1.5	3.7	0.98	25	9.4	123	52	247	55	519	105	30	174	190	1525	10900	6.6	1.6	4.2	1	0.5	1217.73	77.65	162.08	978	12.595	4.125	0.915789	729.624
1031	0.04	28	0.11	1.6	3.5	1.6	19	6.3	77	31	143	32	309	67	6.4	34	38	968	8600	1.4	0.34	10	1	0.5	719.15	29.75	107.4	582	19.563	4.11765	0.894737	815.293
1032	0.03	48	0.24	3.2	6.9	3.4	37	12	143	57	258	56	527	111	10	72	50	1702	7300	1.9	0.43	7.9	1	0.5	1262.77	51.47	202.3	1009	19.6037	4.4186	1.44	790.599
1033	0.24	108	0.59	10	20	6.7	87	27	306	114	492	101	900	173	18	136	116	3290	8500	5	0.8	17	1	0.5	2345.53	118.83	446.7	1780	14.9794	6.25	1.17241	875.307
1034	0.22	55	0.18	4.7	7.1	2.2	34	10	120	47	217	49	470	98	17	115	91	1448	8500	2.3	0.41	6.2	1	0.5	1114.4	60.1	173.3	881	14.6589	5.60976	1.26374	766.356
1035	0.17	149	0.34	5.5	11	3.9	54	17	206	78	361	75	695	138	11	89	58	2261	8100	3.5	0.52	7.9	1	0.5	1793.91	155.01	291.9	1347	8.68976	6.73077	1.53448	790.599
1036	0.02	73	0.17	4.2	7	2.5	35	12	155	63	304	71	708	144	22	203	196	1953	8900	4.3	0.82	8.4	1	0.5	1578.89	77.39	211.5	1290	16.6688	5.2439	1.03571	796.919
1037	0.01	68	0.15	2.7	5.2	0.73	32	12	161	67	318	73	707	137	48	307	323	2053	12200	7	1.5	9.4	1	0.5	1583.79	70.86	210.93	1302	18.3743	4.66667	0.950464	808.701
1038	0.06	44	0.34	6.9	12	4.2	46	15	178	67	302	65	623	125	10	79	68	1918	9200	1.4	0.45	5.2	1	0.5	1488.5	51.3	255.2	1182	23.0409	3.11111	1.16176	749.439
1039	0.09	66	0.45	7.6	12	4.6	58	17	195	73	327	69	638	125	13	105	80	2060	9500	1.8	0.38	6	1	0.5	1592.74	74.14	286.6	1232	16.6172	4.73684	1.3125	763.16
1040	0	2.8	0.01	0.37	0	0.86	14	7.9	148	78	449	115	1225	259	17	27	681	2587	9300	6.3	1.1	3.1	1	0.5	2299.94	3.18	170.76	2126	668.553	5.72727	0.0396476	702.736
1041	0.03	1.7	0	0.11	0.48	0.74	12	7.9	148	74	416	107	1108	235	13	12	490	2498	11500	9.7	1.6	5.9	1	0.5	2110.96	1.84	169.12	1940	1054.35	6.0625	0.0244898	761.529
1042	0.32	7.3	0.12	0.8	2.8	2	32	17	283	131	677	163	1609	313	50	149	1851	4079	9600	25	3.3	14	1	0.5	3238.34	8.54	336.8	2893	338.759	7.57576	0.080497	852.595
1043	4.51	85.4	2.22	13.9	10.5	0.877	57.6	24.1	330	136	663	149	1484	271	986	1734	1869	4148	11163	43.5	11.6	10.3	1	0.5	3232.11	106.03	423.077	2703	25.4928	3.75	0.927769	818.47
1044	6.36	66.2	3.39	21.6	12.6	0.947	49.4	19.7	264	108	526	118	1193	222	746	1060	1496	3303	11950	42.3	12.5	13	1	0.5	2611.2	97.55	346.647	2167	22.2142	3.384	0.708556	844.162
1045	2.23	24.2	0.665	4.09	3.44	0.404	23.3	11.1	172	79.2	423	102	1113	217	701	626	1813	2546	17301	53	18.9	11.7	1	0.5	2175.63	31.185	210.244	1934.2	62.0234	2.80423	0.345284	832.386
1046	1.46	25	0.84	6.11	5.88	0.62	34.9	15.5	234	107	531	126	1330	256	894	733	2194	3349	16455	37.6	11.8	13.8	1	0.5	2674.31	33.41	290.9	2350	70.3382	3.18644	0.334093	850.948
1047	4.28	66.3	1.44	7.35	10.2	0.94	69.4	29.4	402	173	847	189	1852	346	888	1665	1941	5249	13057	44.7	10.7	12	1	0.5	3998.31	79.37	511.94	3407	42.9255	4.17757	0.857805	835.193
1048	1.01	26.5	0.347	2.63	4.18	0.407	24.1	10.8	146	62.7	327	81.1	914	205	652	532	2033	1968	12560	23.4	4.39	11.1	1	0.5	1805.77	30.487	185.487	1589.8	52.1468	5.3303	0.261682	826.595
1049	3.42	80.7	1.87	13.1	13.6	1	69.6	26.7	334	137	651	142	1410	261	689	1246	1385	4210	10508	26	6.05	11.6	1	0.5	3144.99	99.09	444.9	2601	26.2489	4.29752	0.899639	831.438
1050	1.46	73	0.656	5.38	9.63	0.92	67.5	29.6	400	166	801	177	1759	318	966	52.41	2057	5116	11829	47.7	11.4	11.9	1	0.5	3809.15	80.496	507.65	3221	40.0144	4.18421	0.0254789	834.264
1051	76.1	193	15.2	59.5	16.2	1.49	38.5	14.5	193	82.6	429	102	1111	226	651	1416	1868	2683	11930	38	7.97	12	1	0.5	2558.09	343.8	263.69	1950.6	5.67365	4.76788	0.75803	835.193
1052	4.44	86.2	2.11	14.6	15.5	1.48	87.9	37.1	496	207	1005	219	2166	391	34.03	52.41	2087	6453	9735	38.3	7.46	11.5	1	0.5	4733.33	107.35	637.98	3988	37.1495	5.13405	0.0251126	830.483
1053	16.3	41.2	3.19	14.8	3.65	0.71	8.37	3.25	50.7	29.3	190	52.3	689	176	558	181	2320	1078	9376	34.5	9.23	9.39	1	0.5	1278.77	75.49	66.68	1136.6	15.0563	3.73781	0.0780172	808.588
1054	27	107	6.65	31.6	13.7	1.25	49.9	19.3	260	111	561	132	1392	282	893	52.41	2645	3483	11942	50.8	10.7	12.2	1	0.5	2994.4	172.25	344.15	2478	14.3861	4.74766	0.0198147	837.033
1055	0.6	34.9	0.339	2.74	4.57	0.36	29.7	12.3	166	70.2	357	81.9	896	195	640	617	1561	2239	14017	24.8	5.47	12	1	0.5	1851.61	38.579	212.93	1600.1	41.4759	4.53382	0.395259	835.193
1056	0.69	6.86	0.158	1.07	1.29	0.17	5.81	2.52	34.5	15.7	89.4	22.8	291	85.1	454	140	1030	535	13499	7.65	1.6	11.6	1	0.5	557.068	8.778	44.29	504	57.4163	4.78125	0.135922	831.438
1057	0.035	7.65	0.074	1.97	4.81	0.99	25.1	7.94	111	41.8	191	43.7	415	70.7	64.2	131	280	1233	8713	0.48	0.18	12.7	1	0.5	921.769	9.729	149.84	762.2	78.3431	2.66667	0.467857	841.531
1058	0.37	10	0.24	3.43	5.57	1.79	33.3	11.8	138	54.8	240	52.2	507	81.8	104	283	317	1578	6219	0.72	0.13	12.6	1	0.5	1140.3	14.04	190.46	935.8	66.6524	5.53846	0.892744	840.643
1059	0.114	12.9	0.093	1.92	3.98	0.82	25.2	9.43	121	46.7	208	46.4	447	73	58.6	65.6	200	1298	9955	2.71	0.67	14.3	1	0.5	996.557	15.027	160.43	821.1	54.6416	4.04478	0.328	855.032
1060	0.084	6.52	0.05	0.23	1.34	0.58	9.72	3.42	44.2	17.6	74.6	17.3	176	27.7	76.3	161	340	500	12394	0.78	0.13	15.3	1	0.5	379.344	6.884	59.26	313.2	45.4968	6	0.473529	862.87
1061	0.14	8.7	0.084	0.42	0.9	0.54	6.38	2.36	29.3	11.7	53.7	12.6	130	21	62.2	43.6	369	335	10850	5.97	1.56	19.6	1	0.5	277.824	9.344	39.48	229	24.5077	3.82692	0.118157	892.545
1062	0.152	36.6	0.249	5.62	12.6	2.4	66.3	24.3	298	110	472	98.7	958	148	121	212	325	3010	8636	6.27	1.65	17.9	1	0.5	2232.92	42.621	403.6	1786.7	41.9206	3.8	0.652308	881.496
1063	0.029	8.62	0.136	2.72	4.24	1.91	28	10.3	132	49.8	221	50.8	503	80	94.8	226	247	1490	7820	0.95	0.08	8.55	1	0.5	1092.56	11.505	176.45	904.6	78.6267	11.875	0.91498	798.756
1064	0.117	12.2	0.19	4.08	7.53	1.75	36.6	12.3	146	53.8	229	49	483	76.4	65.9	179	259	1519	7539	0.62	0.23	12	1	0.5	1111.97	16.587	204.18	891.2	53.7288	2.69565	0.69112	835.193
1065	0.125	1.04	0.075	0.39	0.75	0.51	3.58	0.73	6.09	1.64	5.44	1.08	10.4	1.52	40.1	8.05	252	47.8	11416	0.68	0.08	14.8	1	0.5	33.37	1.63	11.66	20.08	12.319	8.5	0.0319444	859.003
1066	0.161	6.95	0.038	0.56	2.05	0.84	12.5	4.79	59.1	22.8	104	24.5	242	40.7	39.1	84	179	675	8294	0.87	0.16	13.6	1	0.5	520.989	7.709	79.28	434	56.2978	5.4375	0.469274	849.281
1067	0.21	7.94	0.125	1.44	3.46	0.96	20.5	7.93	97.8	40.5	191	43.6	430	72.4	80.1	178	225	1217	7111	0.79	0.17	15.4	1	0.5	917.865	9.715	130.65	777.5	80.0309	4.64706	0.791111	863.631
1068	0.046	10.3	0.199	3.59	5.55	1.27	28.2	10	123	47.9	214	47.9	470	76.9	50.4	82.3	77.4	1384	8282	1.09	0.2	12.6	1	0.5	1038.86	14.135	168.02	856.7	60.6084	5.45	1.06331	840.643
1069	0.122	5.78	0.103	1.05	2.59	0.77	15.1	5.11	60.4	22.9	103	22.4	217	35.9	78	132.5	403	658	8370	0.74	0.07	16.3	1	0.5	492.225	7.055	83.97	401.2	56.8675	10.5714	0.328784	870.311
1070	0.111	16.5	0.136	3.65	7.32	1.24	36.3	13.4	170	66.04	301	68.7	690	111	66	185.4	284	1956	9503	1.14	0.34	8.99	1	0.5	1485.4	20.397	228.26	1236.74	60.6334	3.35294	0.652817	803.998
1071	0.103	12.4	0.101	2.07	3.22	0.92	20.6	8.46	106	44.64	218	49.5	491	93.6	64	92.8	116	1352	9828	0.68	0.31	13.2	1	0.5	1050.61	14.674	139.2	896.74	61.1108	2.19355	0.8	845.889
1072	0.12	9.15	0.3	4.02	4.94	1.23	32.6	11.3	160	65.98	306	64.6	606	102	82.3	226.1	260	1981	9589	0.65	0.3	17.4	1	0.5	1368.24	13.59	210.07	1144.58	84.2222	2.16667	0.869615	878.089
1073	0.27	18.3	0.38	4.85	12.11	1.9	63.2	21.8	250	90.45	397	87.2	856	131	231	657.2	693	2695	8307	2.66	0.5	10	1	0.5	1934.46	23.8	349.01	1561.65	65.6155	5.32	0.948341	815.293
1074	0.103	3.5	0.061	0.61	0.61	0.3	2.13	0.59	4.89	1.47	4.78	0.96	9.19	1.75	35.5	6.13	221	39.7	11010	0.68	0.18	10.5	1	0.5	30.944	4.274	8.52	18.15	4.24661	3.77778	0.0277376	820.548
1075	0.104	11.4	0.139	1.29	2.92	1.06	17.7	7.44	91.3	34	143	30.1	270	41.2	58.5	39.1	286	897	9747	4	0.572	8.44	1	0.5	651.653	12.933	120.42	518.3	40.0758	6.99301	0.136713	797.412
1076	0.123	5.6	0.127	0.22	1.08	0.61	3.7	0.79	6.42	1.77	5.76	0.91	8.35	1.17	45.7	9.6	273	51.5	10569	0.66	0.149	13.2	1	0.5	36.63	6.07	12.6	17.96	2.95881	4.42953	0.0351648	845.889
1077	0.155	4.11	0.113	0.53	0.61	0.31	1.85	0.372	2.8	0.85	2.89	0.459	4.56	0.59	30.4	5.77	188	24.3	11178	0.72	0.109	11.8	1	0.5	20.199	4.908	5.942	9.349	1.90485	6.6055	0.0306915	833.328
1078	0.109	20.6	0.112	1.05	3.06	1	25.1	9.97	132	52	229	49.8	496	77.4	80	67.5	310	1433	8498	9.95	4.17	13.6	1	0.5	1097.2	21.871	171.13	904.2	41.3424	2.38609	0.217742	849.281
1079	0.122	2.99	0.126	0.6	0.71	0.29	2.68	0.5	4.42	1.07	3.46	0.8	6.12	0.77	45.1	15.8	265	33	10014	0.57	0.088	8.08	1	0.5	24.658	3.838	8.6	12.22	3.18395	6.47727	0.0596226	792.911
1080	0.18	3.64	0.037	0.62	0.92	0.53	2.91	0.64	4.87	1.38	4.94	0.97	9.52	1.56	38.7	7.51	232	40.1	10132	0.78	0.239	9.08	1	0.5	32.717	4.477	9.87	18.37	4.10319	3.2636	0.0323707	805.045
1081	0.83	62.6	0.27	2.55	5.68	2.13	39	16.1	215	85.5	371	82.2	776	119	143	191	528	2246	8936	22.9	3.9	16.4	1	0.5	1777.86	66.25	277.91	1433.7	21.6408	5.87179	0.361742	871.035
1082	0.54	22.9	0.414	5.41	7.5	1.55	44.8	16.3	216	86.9	401	91.9	910	149	566	1429	1209	2650	8932	3.03	0.79	12.7	1	0.5	1954.21	29.264	286.15	1638.8	56.0005	3.83544	1.18197	841.531
1083	0.095	4.11	0.08	0.19	0.43	0.38	1.9	0.378	3.1	0.75	2.58	0.5	4.18	0.57	31	4.66	181	24.7	11003	0.57	0.13	9.38	1	0.5	19.243	4.475	6.188	8.58	1.91732	4.38462	0.0257459	808.475
1084	0.46	33.8	0.52	8.33	15	3.47	79.2	29.9	355	128	533	107	968	139	99.9	157	199	3343	6204	5.98	0.95	9.24	1	0.5	2400.68	43.11	482.57	1875	43.4934	6.29474	0.788945	806.886
1085	0.187	9.41	0.067	0.64	2.18	0.73	13.7	5.1	66.8	24.1	109	23.1	239	35.6	60.9	40.8	299	671	9764	4.8	1.2	16	1	0.5	529.614	10.304	88.51	430.8	41.809	4	0.136455	868.118
1086	0.239	36.8	0.2	4.22	11.1	2.82	68.2	25.1	309	113	474	98.6	936	134	104	169	368	2928	5576	8.97	1.8	19.1	1	0.5	2213.28	41.459	416.22	1755.6	42.3454	4.98333	0.459239	889.377
1087	0.68	38.1	0.146	2.87	7.78	2.28	53.8	21.3	278	107	465	99.7	914	141	132	178	508	2820	6613	15.6	2.33	9.61	1	0.5	2131.66	41.796	363.16	1726.7	41.3126	6.69528	0.350394	811.045
1088	0.119	2.59	0.044	0.71	0.59	0.31	2.66	0.58	4.31	1.5	5.77	1.05	11.6	1.83	41	2.53	240	40.7	10335	0.72	0.046	10.9	1	0.5	33.663	3.463	8.45	21.75	6.28068	15.6522	0.0105417	824.609
1089	0.15	47.7	0.182	3.1	9.12	2.29	61.7	25.6	329	125	529	112	1009	145	165	224	538	3304	8232	25.5	4.58	13.1	1	0.5	2398.84	51.132	427.71	1920	37.5499	5.56769	0.416357	845.028
1090	0.106	0.835	0.083	0.35	0.74	0.129	0.68	0.267	2.7	0.681	2.11	0.385	2.97	0.488	8.37	1.83	34.2	21.3	9973	0.43	0.039	11.1	1	0.5	12.524	1.374	4.516	6.634	4.82824	11.0256	0.0535088	826.595
1091	0.167	0.383	0.096	0.25	0.5	0.14	0.62	0.36	3.66	1.05	3.08	0.553	4.85	0.87	8.07	1.06	31.9	31.2	10913	0.4	0.037	11.7	1	0.5	16.579	0.896	5.28	10.403	11.6105	10.8108	0.0332288	832.386
1092	0.1	1.16	0.076	0.28	0.64	0.193	1.36	0.394	3.28	0.839	2.82	0.453	3.75	0.652	11.8	3.36	62.8	29.5	10056	0.46	0.038	11.5	1	0.5	15.997	1.616	5.867	8.514	5.26856	12.1053	0.0535032	830.483
1093	0.116	0.89	0.079	0.33	0.75	0.23	1.16	0.543	4.58	1.14	3.75	0.577	4.92	0.915	14.2	3.56	80.9	38	9417	0.48	0.055	11.2	1	0.5	19.98	1.415	7.263	11.302	7.98728	8.72727	0.0440049	827.578
1094	0.057	0.39	0.032	0.229	0.45	0.076	0.72	0.269	2.82	0.704	2.39	0.398	3.56	0.862	6.21	0.951	30.6	24.3	9107	0.218	0.04	10.3	1	0.5	12.957	0.708	4.335	7.914	11.178	5.45	0.0310784	818.47
1095	0.079	0.98	0.048	0.22	0.51	0.122	0.64	0.185	1.84	0.49	1.68	0.296	2.62	0.47	12.1	2.65	51	17.4	10674	0.22	0.044	12.9	1	0.5	10.18	1.327	3.297	5.556	4.18689	5	0.0519608	843.29
1096	0.075	0.67	0.051	0.212	0.3	0.097	0.98	0.369	4.35	1.12	3.66	0.628	6.05	1.05	7.88	1.66	43.7	36.1	10714	0.243	0.045	12.4	1	0.5	19.612	1.008	6.096	12.508	12.4087	5.4	0.0379863	838.85
1097	0.071	14.7	0.076	1.43	2.7	1.51	15.2	4.15	49.8	19	79.2	15.9	151	27.9	19.4	24.2	74	527	8428	0.58	0.133	12.9	1	0.5	382.637	16.277	73.36	293	18.0009	4.3609	0.327027	843.29
1098	0.079	1.17	0.058	0.208	0.28	0.279	1.94	0.666	5.43	1.18	3.68	0.55	4.51	0.782	32.2	12.2	231	38.2	9744	0.191	0.03	10.7	1	0.5	20.812	1.515	8.595	10.702	7.06403	6.36667	0.0528139	822.594
1099	0.044	1.05	0.024	0.144	0.31	0.111	0.64	0.217	2.5	0.69	2.35	0.425	3.4	0.536	9.46	2.32	53.8	23	10928	0.184	0.03	12.4	1	0.5	12.441	1.262	3.778	7.401	5.8645	6.13333	0.0431227	838.85
1100	0.067	0.584	0.026	0.22	0.28	0.081	0.57	0.213	1.88	0.515	1.63	0.248	2.35	0.383	8.5	2.51	37.6	16.2	10476	0.161	0.034	11.4	1	0.5	9.047	0.897	3.024	5.126	5.7146	4.73529	0.0667553	829.521
1101	0.038	0.448	0.045	0.126	0.27	0.076	0.63	0.304	2.89	0.75	2.56	0.432	3.69	0.639	7.46	1.88	42	24.1	10356	0.197	0.04	11.3	1	0.5	12.898	0.657	4.17	8.071	12.2846	4.925	0.0447619	828.553
1102	0.061	0.505	0.042	0.201	0.3	0.12	0.96	0.341	3.49	0.96	2.94	0.547	4.49	0.779	7.13	1.95	38.5	29	9905	0.197	0.024	11.4	1	0.5	15.736	0.809	5.211	9.716	12.0099	8.20833	0.0506494	829.521
1103	0.046	0.44	0.048	0.18	0.37	0.146	0.69	0.266	2.22	0.66	1.85	0.267	3.08	0.51	6.15	1.16	29.1	18.1	10108	0.19	0.033	11.7	1	0.5	10.773	0.714	3.692	6.367	8.91737	5.75758	0.0398625	832.386
1104	0.144	1.38	0.061	0.37	0.37	0.17	1.31	0.278	3.44	0.77	1.99	0.345	2.56	0.57	11	4.88	39.7	21.6	9161	0.22	0.038	12.1	1	0.5	13.758	1.955	5.568	6.235	3.18926	5.78947	0.122922	836.116
1105	0.056	0.85	0.038	0.24	0.3	0.114	0.55	0.157	1.59	0.442	1.44	0.229	2.49	0.422	7.91	2.18	29.5	13.8	7846	0.19	0.052	9.14	1	0.5	8.918	1.184	2.711	5.023	4.2424	3.65385	0.0738983	805.738
1106	0.142	4.4	0.146	0.69	0.78	0.32	3.92	0.87	8.54	2.27	7.56	1.5	12.2	1.95	32.1	3.29	191	71.6	11325	0.94	0.223	11.8	1	0.5	45.288	5.378	14.43	25.48	4.73782	4.21525	0.0172251	833.328
1107	0.029	4.38	0.121	0.2	0.83	0.46	2.87	0.93	7.98	2.56	8.4	1.79	15.1	2.49	37.3	4.12	235	78.9	12522	1.02	0.37	10.9	1	0.5	48.14	4.73	13.07	30.34	6.41438	2.75676	0.0175319	824.609
1108	0.188	6.79	0.144	1.18	2.36	0.88	12.7	4.57	50.5	18.7	78.8	16.7	157	27.8	46.2	41	252	543	10762	1.01	0.319	10.3	1	0.5	378.312	8.302	71.01	299	36.0154	3.16614	0.162698	818.47
1109	0.231	4.32	0.168	0.28	0.63	0.42	2.82	0.76	7.58	2.08	6.8	1.51	13	2.17	35.5	4	199	69.9	11016	1.28	0.29	10.2	1	0.5	42.769	4.999	12.21	25.56	5.11302	4.41379	0.0201005	817.42
1110	0.144	18.9	0.58	10.5	21	7.36	101	32.4	368	131	533	108	983	164	67.3	126	217	3431	7090	5.68	0.98	10.9	1	0.5	2478.88	30.124	529.76	1919	63.7034	5.79592	0.580645	824.609
1111	0.162	5.95	0.167	1.22	2.36	0.75	14.1	4.73	48.7	17.8	72.3	14.1	121	21.2	43.3	21	227	482	10280	1.3	0.41	18.7	1	0.5	324.539	7.499	70.64	246.4	32.8577	3.17073	0.092511	886.795
1112	0.105	4.54	0.0612	0.51	0.41	0.28	2.42	0.98	8.79	2.45	8.54	1.71	16.2	2.75	37.7	4.81	231	80.3	11486	0.85	0.437	10.5	1	0.5	49.7462	5.2162	12.88	31.65	6.06764	1.94508	0.0208225	820.548
1113	0.39	26.4	0.38	5.49	11	1.39	59.5	20.5	256	98.1	426	86.8	800	127	102	192	341	2679	8780	5.89	1.96	12.9	1	0.5	1918.95	32.66	348.39	1537.9	47.0882	3.0051	0.56305	843.29
1114	0.294	4.26	0.072	0.35	0.62	0.39	2.95	0.76	8.1	2.08	7.08	1.41	12.1	1.89	35.8	4	205	71.3	11116	0.73	0.312	12.1	1	0.5	42.356	4.976	12.82	24.56	4.93569	2.33974	0.0195122	836.116
1115	0.27	10.7	0.065	0.84	1.28	0.73	5.55	2.9	29.4	12.3	53.1	12.5	110	20.4	62.3	30.8	332	373	11005	2.9	1.31	15.7	1	0.5	260.035	11.875	39.86	208.3	17.5411	2.21374	0.0927711	865.891
1116	0.202	27.8	0.229	3.7	6.85	2.74	26.4	7.74	82.6	29.7	132	29	282	52.1	131	150	819	847	8999	4.27	0.89	15.2	1	0.5	683.061	31.931	126.33	524.8	16.4354	4.79775	0.18315	862.105
1117	0.207	4.57	0.071	0.41	0.52	0.28	3.06	0.96	9.87	3.31	13.5	3.08	31.6	5.72	38.4	7.39	227	110	11283	1.8	0.83	10.4	1	0.5	77.158	5.258	14.69	57.21	10.8806	2.16867	0.0325551	819.513
1118	0.4	3.87	0.099	0.52	1.04	0.33	2.7	1.02	8.29	2.3	7.95	1.42	13.8	2.24	41.9	2.04	246	76.8	11276	0.91	0.168	13	1	0.5	45.979	4.889	13.38	27.71	5.66783	5.41667	0.00829268	844.162
1119	0.046	5.85	0.078	0.4	1.24	0.41	6.59	1.88	21.3	7.14	28.9	5.63	53	8.01	50.2	15.3	284	203	10657	1.05	0.366	11.1	1	0.5	140.474	6.374	31.42	102.68	16.1092	2.86885	0.0538732	826.595
1120	95.3	182	16.7	70.4	12.9	1.5	17.5	5.32	67.9	28.9	145	38.6	441	79.1	194	381	757	891	11112	5.29	1.64	14.4	1	0.5	1202.12	364.4	105.12	732.6	2.01043	3.22561	0.503303	855.835
1121	0.126	4.33	0.075	0.61	0.86	0.33	3.89	0.86	8.58	2.5	8.83	1.67	14.8	2.34	37.6	6.09	217	81.3	10877	0.8	0.292	11.1	1	0.5	49.801	5.141	14.52	30.14	5.86267	2.73973	0.0280645	826.595
1122	4.75	17.3	1.63	10.9	3.24	1.01	4.83	1.41	21.2	11.3	79.1	29.8	461	101	213	92	1216	426	15265	77.6	56.4	14.1	1	0.5	748.47	34.58	31.69	682.2	19.7282	1.37589	0.0756579	853.412
1123	0.058	4.33	0.159	0.53	0.61	0.44	2.67	0.9	8.14	2.23	7.22	1.34	10.6	1.62	41.5	6.27	238	67.7	10631	0.91	0.36	10.1	1	0.5	40.847	5.077	12.76	23.01	4.5322	2.52778	0.0263445	816.36
1124	0.72	11.1	0.206	1.41	3.21	1.37	11	3.03	28.6	11.9	66.2	20.8	288	60.2	179	86.9	1085	393	12024	10.39	18.4	14.7	1	0.5	507.746	13.436	47.21	447.1	33.2763	0.564674	0.0800922	858.218
1125	0.032	6.32	0.071	0.44	0.79	0.68	3.75	1.02	8.13	2.21	6.81	1.2	9.62	1.47	59.4	13.3	383	69.1	11092	0.71	0.203	14.9	1	0.5	42.543	6.863	14.37	21.31	3.10506	3.49754	0.0347258	859.785
1126	0.49	16.1	0.27	2.86	6.33	0.92	31.2	10.2	135	49.1	220	45	433	76.1	82.5	76.3	240	1481	9092	2.14	0.78	16.6	1	0.5	1026.57	19.72	183.65	823.2	41.7444	2.74359	0.317917	872.472
1127	0.082	4.81	0.039	0.075	0.56	0.37	2.52	0.93	7.92	2.18	7.47	1.45	13	1.83	34.8	3.86	220	72.9	11467	0.78	0.449	11.2	1	0.5	43.236	5.006	12.3	25.93	5.17978	1.73719	0.0175455	827.578
1128	0.152	4.33	0.064	0.37	0.82	0.38	3.76	1.08	10.9	3.32	14.3	2.91	29.4	5.06	45.5	7.65	273	104	11576	0.64	0.536	12.3	1	0.5	76.846	4.916	16.94	54.99	11.1859	1.19403	0.028022	837.944
1129	1.8	13.1	1.52	13.1	9.8	2.13	25.3	6.42	78.5	27	118	22.4	218	37.6	58.3	33.1	261	776	9630	2.78	1.06	14.9	1	0.5	574.67	29.52	122.15	423	14.3293	2.62264	0.12682	859.785
1130	0.111	7.84	0.117	0.91	2.19	0.55	9.04	3.26	39.4	15.3	67.5	15.4	157	27.3	49.6	31.3	265	426	12829	4.65	2.86	17.7	1	0.5	345.918	8.978	54.44	282.5	31.4658	1.62587	0.118113	880.143
1131	0.135	4.29	0.031	0.106	0.57	0.47	2.81	1.02	6.71	1.74	5.96	1.29	9.73	1.44	37.8	5.41	229	61.6	11532	0.57	0.26	7.8	1	0.5	36.302	4.562	11.58	20.16	4.41911	2.19231	0.0236245	789.296
1132	0.026	3.41	0.07	0.17	0.47	0.34	2.64	0.77	6.74	1.52	5.41	0.91	7.01	1.05	52.4	13.1	321	53.5	11849	0.76	0.099	10.5	1	0.5	30.536	3.676	10.96	15.9	4.32535	7.67677	0.04081	820.548
1133	0.032	3.84	0.069	0.29	0.82	0.48	4.18	1.18	9.26	2.21	7.01	1.17	8.87	1.28	48.5	8.44	290	71.3	10775	0.7	0.136	11.6	1	0.5	40.691	4.231	15.92	20.54	4.85464	5.14706	0.0291034	831.438
1134	0.042	4.17	0.106	0.43	1.4	0.63	5.59	1.86	20.5	7.66	31.7	7.08	74	12.2	37.1	8.56	202	227	10972	0.82	0.307	11	1	0.5	167.368	4.748	29.98	132.64	27.936	2.67101	0.0423762	825.606
1135	0.167	23.5	0.14	4.06	7.41	1.84	38.4	14.1	170	67.2	307	69.5	717	126	96.6	169	254	1905	7365	8.48	1.98	13.8	1	0.5	1546.32	27.867	231.75	1286.7	46.1729	4.28283	0.665354	850.948
1136	0.16	2.94	0.096	0.96	1.09	0.2	1.96	0.73	6.66	1.75	7.03	1.29	15.1	2.12	53.7	12.6	322	60.3	12221	0.85	0.49	11	1	0.5	42.086	4.156	10.64	27.29	6.56641	1.73469	0.0391304	825.606
1137	0.142	16.2	0.101	2.04	3.59	1.27	18.2	6.41	79.5	31.7	139	29.7	285	49.3	86.8	99.6	549	883	11306	18.5	16.5	15.4	1	0.5	662.153	18.483	108.97	534.7	28.9293	1.12121	0.181421	863.631
1138	0.123	3.26	0.042	0.35	0.42	0.34	2.41	0.82	6.84	1.85	4.92	0.73	6.88	1.11	52.6	14.8	338	53.3	13246	0.42	0.086	12.3	1	0.5	30.095	3.775	10.83	15.49	4.10331	4.88372	0.043787	837.944
1139	0.147	3.32	0.016	0.22	0.58	0.31	1.99	0.56	5.31	1.09	3.35	0.64	4.95	0.7	30.9	5.16	173	36.6	11882	0.68	0.071	11.2	1	0.5	23.183	3.703	8.75	10.73	2.89765	9.57746	0.0298266	827.578
1140	0.028	3.29	0.184	0.14	0.54	0.28	2.68	0.68	6.17	1.41	4.66	0.71	6.42	0.92	53	15.1	328	48.5	12186	0.74	0.128	10	1	0.5	28.112	3.642	10.35	14.12	3.87699	5.78125	0.0460366	815.293
1141	0.108	16.3	0.125	2.5	5.06	1.21	27.2	10.7	127	50.3	232	53.8	546	101	71.3	109	279	1436	10779	9.73	3.69	20.6	1	0.5	1173.3	19.033	171.17	983.1	51.6524	2.63686	0.390681	898.696
1142	0.158	4.42	0.094	0.39	1.58	0.27	3.19	0.96	7.65	1.8	6.48	1.36	11.4	1.76	44.1	3.58	262	64.7	13138	0.67	0.147	11.5	1	0.5	41.512	5.062	13.65	22.8	4.50415	4.55782	0.0136641	830.483
1143	0.043	8.2	0.082	0.36	1.35	0.58	6.85	2.8	32.1	11.8	54.1	12.2	121	22.2	68.7	25.3	277	345	12130	0.74	0.268	15.7	1	0.5	273.665	8.685	43.68	221.3	25.4807	2.76119	0.0913357	865.891
1144	0.1	6.05	0.058	0.69	2.22	0.61	12.7	3.54	41.4	14.6	59	12.6	114	21.3	51.2	20.3	294	414	12747	1.73	0.53	11.9	1	0.5	288.868	6.898	60.47	221.5	32.1108	3.26415	0.0690476	834.264
1145	0.33	4.05	0.085	0.35	0.61	0.36	2.94	0.99	9.21	2.96	9.14	1.62	15	2.71	54.4	16.4	333	92.1	11457	0.54	0.195	14.9	1	0.5	50.355	4.815	14.11	31.43	6.52752	2.76923	0.0492492	859.785
1146	0.038	1.45	0.056	0.152	0.25	0.116	0.74	0.277	2.96	0.793	2.56	0.434	3.9	0.68	5.75	2.03	33.4	26	10087	0.211	0.053	11.8	1	0.5	14.406	1.696	4.343	8.367	4.93337	3.98113	0.0607784	833.328
1147	0.036	1.6	0.031	0.143	0.29	0.219	1.36	0.488	4.5	1.12	3.51	0.625	5.13	0.863	5.75	2.64	37.8	36.4	10411	0.611	0.047	11.7	1	0.5	19.915	1.81	6.857	11.248	6.21436	13	0.0698413	832.386
1148	0.028	0.711	0.03	0.113	0.184	0.076	0.49	0.159	1.98	0.567	2.16	0.427	3.6	0.597	5.93	1.28	38	19.6	10709	0.152	0.048	11.4	1	0.5	11.122	0.882	2.889	7.351	8.33447	3.16667	0.0336842	829.521
1149	0.037	1.41	0.02	0.085	0.195	0.169	1.06	0.459	5.23	1.65	5.68	1.05	8.84	1.53	9.32	3.36	62.4	51.4	10279	0.201	0.045	11.5	1	0.5	27.415	1.552	7.113	18.75	12.0812	4.46667	0.0538462	830.483
1150	0.108	1.49	0.065	0.11	0.33	0.21	0.95	0.28	3.16	0.9	2.12	0.45	3.58	0.49	6.96	2.55	29.9	25	10910	0.22	0.034	12.4	1	0.5	14.243	1.773	4.93	7.54	4.25268	6.47059	0.0852843	838.85
1151	0.048	1.73	0.029	0.077	0.26	0.135	1	0.32	3.09	0.874	3.1	0.576	4.54	0.758	5.95	2.49	33.9	29	10206	0.121	0.036	11.8	1	0.5	16.537	1.884	4.805	9.848	5.22718	3.36111	0.0734513	833.328
1152	0.048	1.11	0.029	0.17	0.241	0.083	0.67	0.221	3.01	0.7	2.6	0.428	3.7	0.61	6.02	2.18	35.7	23.8	11387	0.17	0.02	12.8	1	0.5	13.62	1.357	4.225	8.038	5.92336	8.5	0.0610644	842.413
1153	0.043	1.97	0.029	0.104	0.17	0.092	0.79	0.255	2.47	0.645	2.17	0.364	2.9	0.518	6.18	3.33	38.2	20.1	10441	0.13	0.026	12.1	1	0.5	12.52	2.146	3.777	6.597	3.07409	5	0.0871728	836.116
1154	0.038	1.27	0.033	0.087	0.22	0.152	0.99	0.291	3.12	0.82	2.48	0.431	3.55	0.563	8.2	2.94	56.1	24.8	10095	0.133	0.03	11.4	1	0.5	14.045	1.428	4.773	7.844	5.493	4.43333	0.0524064	829.521
1155	0.051	1.73	0.024	0.072	0.19	0.24	0.64	0.252	2.5	0.67	2.21	0.398	3.18	0.568	7.63	2.83	36.2	21.4	10806	0.15	0.061	12.1	1	0.5	12.725	1.877	3.822	7.026	3.74321	2.45902	0.0781768	836.116
1156	0.034	1.4	0.029	0.13	0.18	0.158	0.6	0.191	1.85	0.449	1.49	0.27	2.12	0.39	5.31	2.08	30.8	15.7	10288	0.16	0.046	12	1	0.5	9.291	1.593	2.979	4.719	2.96234	3.47826	0.0675325	835.193
1157	0.057	1.65	0.024	0.099	0.27	0.142	0.9	0.28	2.18	0.63	1.9	0.329	2.59	0.444	6.94	2.46	38.2	18.7	9976	0.181	0.03	12.9	1	0.5	11.495	1.83	3.772	5.893	3.22022	6.03333	0.0643979	843.29
1158	0.032	0.75	0.026	0.09	0.23	0.093	0.5	0.181	2.02	0.587	2.38	0.435	3.9	0.616	6.32	1.33	38.1	21.6	9914	0.132	0.03	10.8	1	0.5	11.84	0.898	3.024	7.918	8.81737	4.4	0.0349081	823.605
1159	0.055	1.51	0.021	0.126	0.25	0.177	1	0.275	2.5	0.659	2.42	0.344	3.37	0.488	8.36	4.8	42.6	23.4	10202	0.179	0.024	11.8	1	0.5	13.195	1.712	4.202	7.281	4.25292	7.45833	0.112676	833.328
1160	0.024	1.25	0.042	0.133	0.22	0.137	0.88	0.407	4.66	1.39	5.17	0.938	7.9	1.35	7.18	1.93	44.1	46.4	9532	0.187	0.039	10.7	1	0.5	24.501	1.449	6.304	16.748	11.5583	4.79487	0.0437642	822.594
1161	0.047	0.949	0.042	0.143	0.233	0.09	0.67	0.28	2.56	0.721	2.22	0.377	3.12	0.502	6.38	1.77	36.4	22.9	10190	0.2	0.025	15.2	1	0.5	11.954	1.181	3.833	6.94	5.87638	8	0.0486264	862.105
1162	0.037	1.43	0.025	0.086	0.28	0.146	0.94	0.358	2.93	0.799	2.53	0.445	3.21	0.736	7.35	2.81	44.2	26	9528	0.148	0.032	11.3	1	0.5	13.952	1.578	4.654	7.72	4.89227	4.625	0.0635747	828.553
1163	0.11	2.17	0.084	0.44	0.57	0.299	1.9	0.764	9.12	3.29	14.6	3.08	29.6	5.18	21.5	3.62	142	114	10890	1.43	0.45	11.1	1	0.5	71.207	2.804	12.653	55.75	19.8823	3.17778	0.025493	826.595
1164	0.109	1.3	0.066	0.44	0.67	0.147	0.9	0.253	2.24	0.703	2.22	0.304	2.99	0.84	15.8	5.31	95.3	21.2	10586	0.27	0.038	11.9	1	0.5	13.182	1.915	4.21	7.057	3.68512	7.10526	0.0557188	834.264
1165	0.092	1.9	0.093	0.41	0.47	0.37	3.1	0.86	6.42	1.67	5.81	0.98	8.56	2.15	14.8	1.64	99.2	58.4	11473	0.36	0.103	13.2	1	0.5	32.885	2.495	11.22	19.17	7.68337	3.49515	0.0165323	845.889
1166	0.109	2.32	0.067	0.18	0.61	0.32	1.65	0.48	3.64	0.9	2.3	0.44	3.4	0.62	19.7	5.88	140	27.2	10553	0.34	0.042	12.7	1	0.5	17.036	2.676	6.7	7.66	2.86248	8.09524	0.042	841.531
1167	0.093	3.08	0.109	0.26	0.74	0.248	1.65	0.399	3.53	0.84	2.78	0.54	4.73	0.828	27.8	8.47	169	30.9	10019	0.38	0.043	11.3	1	0.5	19.827	3.542	6.567	9.718	2.74365	8.83721	0.0501183	828.553
1168	0.065	1.54	0.077	0.26	0.52	0.32	2.33	0.73	5.3	1.32	4.17	0.71	5.73	0.94	14.8	2.3	92.8	42.5	11269	0.27	0.036	13	1	0.5	24.012	1.942	9.2	12.87	6.62719	7.5	0.0247845	844.162
1169	0.057	2.23	0.15	0.51	0.96	0.18	1.56	0.43	4.11	1.15	4.05	0.68	6	1	21.6	8.32	147	40.6	11127	0.35	0.115	16	1	0.5	23.067	2.947	7.24	12.88	4.37055	3.04348	0.0565986	868.118
1170	0.111	1.46	0.118	0.23	0.95	0.24	2.16	0.34	4.31	1.31	3.63	0.6	5.04	0.79	36.6	15.1	246	39.3	8703	0.6	0.074	10.8	1	0.5	21.289	1.919	8	11.37	5.92496	8.10811	0.0613821	823.605
1171	0.143	0.55	0.079	0.52	0.93	0.16	0.6	0.184	2.51	0.78	2.63	0.46	3.4	0.66	21	6.29	146	24.2	10146	0.47	0.04	11.3	1	0.5	13.606	1.292	4.384	7.93	6.13777	11.75	0.0430822	828.553
1172	0.082	1.32	0.11	0.46	0.66	0.38	1.08	0.39	3.19	0.67	2.68	0.39	3.9	0.76	19.7	7.89	118	25.6	10648	0.32	0.06	14.6	1	0.5	16.072	1.972	5.7	8.4	4.25963	5.33333	0.0668644	857.428
1173	0.098	0.73	0.104	0.39	0.78	0.22	1.28	0.381	3.29	0.93	3.26	0.61	4.72	0.89	30.5	10.7	199	31.7	10535	0.38	0.038	12	1	0.5	17.683	1.322	5.951	10.41	7.87443	10	0.0537688	835.193
1174	0.101	1.37	0.079	0.23	0.76	0.145	1.22	0.269	2.91	0.74	2.17	0.318	2.46	0.45	17.8	7.84	118	21.5	9538	0.25	0.064	10.2	1	0.5	13.222	1.78	5.304	6.138	3.44831	3.90625	0.0664407	817.42
1175	0.084	2.35	0.097	0.24	0.67	0.29	1.2	0.328	3.25	0.9	2.34	0.48	3.57	0.47	19.5	4.78	123	25.5	10862	0.4	0.065	12.6	1	0.5	16.269	2.771	5.738	7.76	2.80043	6.15385	0.0388618	840.643
1176	0.14	8.8	0.088	0.92	1.32	0.51	7.05	2.39	27.6	9.87	44.8	9.3	92.8	17.4	30.2	20.6	190	303	10564	0.81	0.175	11.2	1	0.5	222.988	9.948	38.87	174.17	17.508	4.62857	0.108421	827.578
1177	1.13	5.57	0.88	7.7	3.13	0.9	3.38	0.474	2.44	0.586	1.76	0.32	2.54	0.414	14.9	5.64	83.6	18.7	9743	0.38	0.215	11.1	1	0.5	31.224	15.28	10.324	5.62	0.367801	1.76744	0.0674641	826.595
1178	0.214	3.39	0.079	0.6	0.93	0.34	2.26	0.66	5.52	1.62	6.22	1.19	11.8	2.39	25.3	3.82	165	53	11147	0.42	0.249	12.1	1	0.5	37.213	4.283	9.71	23.22	5.42143	1.68675	0.0231515	836.116
1179	0.155	2.03	0.114	0.39	0.45	0.22	0.87	0.404	4.34	1.43	6.01	1.1	12.1	2.07	22.4	6.34	122	49.3	10441	0.4	0.164	11.9	1	0.5	31.683	2.689	6.284	22.71	8.44552	2.43902	0.0519672	834.264
1180	0.136	1.78	0.082	0.24	0.68	0.166	1.17	0.305	3.04	0.736	2.59	0.453	3.62	0.661	21.3	3.91	137	25.5	10312	0.32	0.047	11.6	1	0.5	15.659	2.238	5.361	8.06	3.60143	6.80851	0.0285401	831.438
