# Supplementary material for: New machine learning models on reevaluation of the Ti-in-zircon thermometer via multivariate trace elements
Source: Royal Society of Chemistry journal article supplement (doi:10.1039/d4ja00352g), 2024-11-20
Supplement: d4ja00352g1.zip [file TableS5.highT_226.xlsx]

## Sheet: highT_226
entry_id	la_ppm	ce_ppm	pr_ppm	nd_ppm	sm_ppm	eu_ppm	gd_ppm	tb_ppm	dy_ppm	ho_ppm	er_ppm	tm_ppm	yb_ppm	lu_ppm	pb_ppm	th_ppm	u_ppm	y_ppm	hf_ppm	nb_ppm	ta_ppm	ti_ppm	α(SiO2)	α(TiO2)	REE	LREE	MREE	HREE	HREE/LREE	Nb/Ta	Th/U	T(℃)
1	0.0110491	18.7453	0.0980313	1.52981	2.95935	0.628235	15.3322	4.70252	53.0956	19.5015	81.9944	18.1873	167.25	28.443	48.7352	145.835	130.011	553.638	11217	2.3949	1.59535	26.3928	1	0.5	412.479	20.3842	76.718	315.377	15.4717	1.50117	1.12171	930.314
2	0.0177346	43.2484	0.165591	3.23686	4.26628	0.943685	15.1073	3.87253	36.4874	12.2094	48.2099	10.7598	104.491	20.1951	17.5916	19.4965	52.0681	335.181	8176.02	0.903694	0.239728	24.7618	1	0.5	303.211	46.6686	60.6771	195.865	4.19695	3.76967	0.374442	922.013
3	0.0119999	73.2042	0.260682	4.2789	6.4381	1.43702	22.8353	5.7626	54.4275	17.7051	68.2373	14.2866	133.225	23.0248	8.82387	28.9864	20.3352	485.397	7846.07	1.54781	0.401573	38.3661	1	0.5	425.136	77.7558	90.9006	256.479	3.29852	3.85436	1.42543	981.417
4	0.101185	15.7799	0.196208	3.28497	6.2554	0.126334	26.7554	8.24444	94.7011	34.0185	143.571	30.9193	289.338	47.1455	23.3678	48.0533	58.9114	924.674	10051.7	6.74474	2.25761	21.3067	1	0.5	700.437	19.3623	136.083	544.992	28.1471	2.98755	0.815687	902.901
5	0.121829	13.3587	0.798875	12.7346	17.9712	1.05224	64.1164	18.0088	183.524	61.6666	248.921	51.6073	455.004	73.679	15.6862	38.7624	39.0124	1714.08	8606.92	2.7185	1.03047	22.5635	1	0.5	1202.56	27.0141	284.672	890.878	32.9783	2.63812	0.993593	910.118
6	0.0106526	1.81736	0.152362	2.41107	6.6995	0.229115	19.4882	3.60221	24.2924	5.02717	13.823	2.33994	17.0179	2.06966	76.5373	45.8512	215.271	146.202	12022.3	0.14426	0.029056	25.3383	1	0.5	98.9805	4.39144	54.3114	40.2776	9.17185	4.96491	0.212993	924.995
7	0	3.51153	0.0624836	0.893653	2.32935	0.112102	11.711	3.95584	48.9266	18.1323	78.6506	16.9342	158.646	25.5002	31.7959	62.2243	77.0586	525.089	10521.9	0.741641	0.494226	22.6629	1	0.5	369.366	4.46767	67.0348	297.864	66.671	1.50061	0.807493	910.675
8	0	9.25787	0.0708062	1.91112	4.57321	0.410575	13.2771	2.90175	28.2168	9.49987	42.2783	11.0569	120.299	22.8125	103.581	115.393	250.906	298.084	12592.6	0.469458	0.301595	27.905	1	0.5	266.565	11.2398	49.3795	205.946	18.323	1.55658	0.459904	937.66
9	0.159196	20.0427	0.124799	2.11039	4.0338	1.0954	13.8371	4.48902	50.2005	19.3072	91.4509	23.1432	255.877	48.4926	45.9537	83.632	93.47	611.544	9277.32	0.657542	0.321808	23.7609	1	0.5	534.364	22.4371	73.6557	438.271	19.5333	2.04327	0.894748	916.704
10	0.162653	35.0415	0.963427	12.6084	12.8256	3.9354	48.1337	13.4705	148.377	50.1457	204.144	44.8488	423.018	67.2012	74.2825	165.8	104.184	1410.16	8155.96	1.65701	0.701126	20.9158	1	0.5	1064.87	48.776	226.742	789.357	16.1833	2.36336	1.59142	900.589
11	0.02	236.157	30.4184	156.289	37.7749	0.753131	71.6195	18.4175	186.851	61.5163	243.409	47.2593	403.784	58.8191	7.86036	223.67	315.568	1634.55	7372.15	10.6111	2.87022	24.6512	1	0.5	1553.09	422.884	315.416	814.787	1.92674	3.69698	0.708785	921.435
12	0.0585069	3.30885	0.240033	5.07144	6.12172	0.490058	13.2838	2.79213	17.8861	3.49168	11.5391	2.77788	27.8721	4.55088	110.081	293.651	313.411	106.156	12205.6	0.178166	0.061538	89.1796	1	0.5	99.4843	8.67882	40.5737	50.2317	5.78785	2.89522	0.936952	1114.25
13	0.031704	1.76385	0.190101	3.10437	7.00319	0.270596	31.4602	9.13847	86.3671	24.8705	94.6975	19.7259	184.269	26.9492	133.445	107.126	357.391	723.821	11973.3	0.72507	0.549894	34.6937	1	0.5	489.842	5.09003	134.24	350.512	68.8624	1.31856	0.299743	967.25
14	0.0052418	4.67638	0.0986627	1.83996	2.82784	0.219986	13.1703	3.85169	44.9716	16.3478	67.6515	15.5882	155.452	25.2589	6.0022	11.4099	15.0938	455.139	8420.76	1.38984	0.458975	27.4482	1	0.5	351.96	6.62024	65.0414	280.299	42.3397	3.02815	0.755933	935.475
15	0.125342	16.2146	0.108992	1.20954	2.65568	0.356023	12.1825	3.69607	42.144	16.4381	77.3016	17.9426	182.406	35.8126	34.1021	114.469	51.766	498.321	11748.9	1.03872	0.33654	37.1627	1	0.5	408.594	17.6585	61.0343	329.901	18.6823	3.08647	2.21127	976.895
16	13.2007	43.1892	4.24383	21.9194	6.52226	1.63747	16.5284	5.05905	57.6201	22.3621	98.0054	24.0791	247.168	42.3045	100.819	82.2795	180.371	643.695	8389.68	1.40706	0.772963	109.7	1	0.5	603.84	82.5531	87.3672	433.919	5.25624	1.82035	0.456169	1151.28
17	0.588907	23.4787	0.268761	2.69237	3.39839	0.5664	11.5743	3.57234	40.3358	14.2034	62.2408	14.3735	142.206	22.9663	42.2914	59.7253	65.7922	422.137	9197.43	1.09312	0.40789	70.8462	1	0.5	342.466	27.0288	59.4473	255.99	9.471	2.67994	0.907787	1075.3
18	0.0534039	9.1054	0.024381	0.610494	1.45496	0.517114	7.91547	2.24132	25.9586	9.74025	46.1963	10.9259	111.415	19.7342	37.7386	55.5454	57.8682	291.919	9675.44	0.614061	0.148708	53.1817	1	0.5	245.893	9.79368	38.0875	198.012	20.2183	4.12932	0.959861	1029.71
19	0.183809	11.367	0.530318	8.83283	10.7519	0.82413	40.1225	10.8166	114.799	38.8473	154.884	33.0578	301.71	50.9292	5.3512	111.856	77.0382	1037.39	8161.59	0.824974	0.423142	22.769	1	0.5	777.656	20.9139	177.314	579.428	27.7054	1.94964	1.45195	911.267
20	0.0121616	13.2139	0.0423236	0.873681	2.63291	0.707875	19.0697	7.22387	99.0479	39.047	187.407	43.949	437.87	76.9741	10.7142	57.3621	67.5254	1118.65	10036.5	1.52538	0.638568	22.9242	1	0.5	928.072	14.142	128.682	785.247	55.5258	2.38875	0.84949	912.13
21	1.19969	31.8476	4.93514	35.9986	27.2735	9.48442	51.6627	15.2145	159.714	48.2136	198.868	47.6499	463.638	73.4306	233.649	151.902	825.761	1390.92	13343.6	1.32182	1.15851	28.5691	1	0.5	1169.13	73.981	263.349	831.8	11.2434	1.14096	0.183954	940.788
22	0.0388564	4.76578	0.338616	4.695	7.33297	0.51026	27.5611	8.1361	81.8501	28.901	115.423	24.7027	223.776	37.6684	5.88348	14.217	15.234	772.102	8824.66	1.44014	0.52735	23.6493	1	0.5	565.7	9.83826	125.391	430.471	43.7548	2.7309	0.933239	916.102
23	0.105352	5.92769	0.726785	10.7616	14.5175	1.21567	50.1174	13.7101	140.869	45.2551	175.01	35.5799	320.917	50.323	7.02274	20.3054	17.2564	1206.25	8249.36	1.10185	0.422371	28.3698	1	0.5	865.037	17.5215	220.43	627.085	35.7895	2.60873	1.17669	939.855
24	0.0058823	5.96025	0.136501	1.83198	2.98258	0.259691	16.8813	4.8986	57.4208	18.6886	77.7873	16.3945	150.679	23.4088	29.1268	46.2054	75.5242	542.772	10051.3	1.8356	0.788649	22.5252	1	0.5	377.336	7.93462	82.4429	286.959	36.1654	2.32753	0.611796	909.902
25	0.0056201	1.98629	0.0685004	1.64528	3.41623	0.121189	16.0566	3.07917	22.0968	4.74234	13.5772	2.2195	16.8438	2.43623	80.0035	55.9128	227.453	140.178	12673.5	0.137916	0.0786606	21.9103	1	0.5	88.2947	3.70569	44.7699	39.8191	10.7454	1.7533	0.245821	906.408
26	0.0332866	9.36964	0.2308	4.01344	5.60775	0.67554	22.2197	6.38703	69.2393	23.0948	92.2092	19.7153	180.004	29.7972	26.7152	61.9191	62.222	638.282	9317.27	1.30054	0.57999	23.1782	1	0.5	462.597	13.6472	104.129	344.82	25.2668	2.24235	0.995133	913.532
27	1.75182	17.5268	0.876587	5.00057	2.95572	1.07708	12.7825	3.77004	44.5674	17.1365	78.342	18.0993	180.803	31.7962	83.2303	72.8962	173.381	511.11	9515.25	1.89782	0.747198	85.6339	1	0.5	416.486	25.1558	65.1528	326.177	12.9663	2.53991	0.420439	1107.22
28	0.0341815	24.6475	0.184976	2.62903	4.17863	1.22897	13.3478	4.24192	46.6105	17.4466	82.1786	19.9521	207.676	37.3026	6.16902	171.824	135.518	534.833	8476.59	1.9502	0.82961	22.8136	1	0.5	461.659	27.4957	69.6078	364.556	13.2587	2.35075	1.26791	911.516
29	0.268909	27.9144	0.133568	2.26725	3.83386	0.251842	23.0563	8.03342	103.179	39.853	187.928	43.6276	427.895	73.0117	16.6486	296.698	317.511	1168.19	9681.73	5.55197	2.07502	32.3736	1	0.5	941.255	30.5842	138.354	772.316	25.2521	2.67563	0.93445	957.689
30	0.621675	3.27529	0.398652	6.23452	14.2781	0.223825	72.7108	22.8202	256.235	90.631	369.172	75.2109	667.415	104.877	103.693	171.197	289.133	2576.68	10480	0.867158	0.553572	55.9687	1	0.5	1684.1	10.5301	366.268	1307.31	124.149	1.56648	0.592106	1037.6
31	0.00591202	6.26536	0.0616743	1.0701	2.05339	0.232619	9.21639	3.03678	33.5195	12.0698	53.617	11.7199	114.509	19.4346	16.8471	14.0329	42.4638	339.391	10947.3	1.02547	0.586348	21.7778	1	0.5	266.812	7.40305	48.0587	211.35	28.549	1.74892	0.330467	905.645
32	0.0477046	7.29187	0.099563	1.09421	1.7942	0.380458	10.2859	3.92115	52.0809	20.6465	105.801	28.0145	315.133	58.947	124.23	58.9632	303.914	620.961	11901.5	1.58412	0.910982	24.3639	1	0.5	605.538	8.53334	68.4626	528.542	61.9385	1.73891	0.194013	919.923
33	63.5582	168.526	21.4091	104.487	23.2894	0.912314	38.8524	9.72871	114.138	42.1709	184.745	40.4558	389.466	66.526	135.118	192.082	295.633	1161.21	9563.06	2.7528	0.938002	43.498	1	0.5	1268.26	357.98	186.921	723.364	2.02068	2.93475	0.649732	999.553
34	2.13902	24.6962	0.719022	4.02836	3.55354	1.01343	17.6179	6.08832	80.8045	34.3595	171.298	43.5169	474.857	92.7869	212.217	273.081	403.241	1065.36	9399.41	3.16063	1.37426	59.8459	1	0.5	957.478	31.5826	109.078	816.818	25.8629	2.29987	0.677215	1048.1
35	1.62912	88.2096	2.93084	18.4319	15.2939	5.51865	35.5673	10.9305	116.296	36.8958	152.143	34.683	340.082	57.6424	327.517	386.973	572.068	1106.05	10327.5	1.89954	1.01271	24.3004	1	0.5	916.254	111.201	183.607	621.445	5.58847	1.87569	0.676446	919.587
36	0.0526803	10.6713	0.0840433	1.11198	2.14437	0.450062	15.0136	5.79837	74.5378	28.6252	135.369	32.7153	329.836	58.1783	111.674	76.6098	192.48	891.793	10550.6	3.23008	2.10745	33.5351	1	0.5	694.588	11.92	97.9442	584.724	49.0539	1.5327	0.398014	962.54
37	0.00824485	0.9995	0.030041	0.929601	3.06719	0.128745	11.505	2.29663	14.8758	2.35843	5.55744	0.590002	4.81384	0.588943	101.749	31.7389	281.241	82.5338	13047.3	0.407719	0.195285	51.0391	1	1	47.7494	1.96739	31.8733	13.9087	7.06961	2.08781	0.112853	925.922
38	0.00631746	1.11765	0.0375753	1.23745	3.47886	0.137924	11.2119	1.88438	11.3347	1.65799	4.29748	0.496953	3.74201	0.454293	127.918	29.3925	396.149	58.5483	12911.4	0.2399	0.0815625	52.8654	1	1	41.0954	2.39899	28.0477	10.6487	4.43884	2.9413	0.0741957	930.513
39	0.00633297	0.702568	0.0569825	0.922969	2.65898	0.163874	11.1628	2.08926	13.0192	1.86908	5.1701	0.649967	5.56078	0.813713	85.4177	16.6784	267.971	65.3116	13336.5	0.423718	0.406182	57.3781	1	1	44.8466	1.68885	29.0941	14.0636	8.32734	1.04317	0.0622397	941.347
40	0.341317	12.8249	0.133361	1.19797	2.73797	0.532671	11.0914	2.86302	36.4728	13.371	72.172	17.5416	222.97	41.4095	356.234	191.386	571.484	461.034	12689.4	1.50313	1.07846	53.3076	1	1	435.66	14.4975	53.6979	367.464	25.3467	1.39377	0.334894	931.605
41	0.0304495	2.60509	0.146066	3.23884	4.25321	0.0694988	8.42956	1.0844	5.68914	0.704832	1.43681	0.18553	1.33286	0.258103	387.633	157.703	519.735	23.3323	12406.7	0.165795	0.0226598	55.1283	1	1	29.4644	6.02045	19.5258	3.91813	0.650804	7.31671	0.30343	936.032
42	0.0300351	1.03989	0.060861	0.713159	1.28254	0.156665	6.83627	2.15307	25.8854	9.55264	54.1313	14.4151	192.916	37.1459	258.179	32.2819	783.902	329.438	13059.8	1.3513	1.60494	50.254	1	1	346.319	1.84394	36.314	308.161	167.121	0.84196	0.0411811	923.908
43	0.0213992	1.70486	0.119752	1.95836	4.48157	0.14987	11.3774	1.71284	8.83154	1.52582	3.89469	0.572977	5.13774	0.847102	133.387	84.1744	199.37	49.7846	11844.4	0.270071	0.0213395	53.5588	1	1	42.3359	3.80437	26.5532	11.9783	3.14857	12.6559	0.422202	932.223
44	0.017324	0.654567	0.0298789	0.456108	1.16798	0.144857	8.3588	2.4303	28.1573	9.00679	48.687	12.0123	148.889	27.634	143.096	21.8254	480.318	321.75	13161	0.710019	0.704429	51.2402	1	1	287.646	1.15788	40.2592	246.229	212.655	1.00793	0.0454395	926.433
45	0.02	5.86	82.4995	0.62	42.6873	0.45742	28.7092	7.47826	105.626	38.5651	196.438	42.2914	485.185	84.0941	796.135	823.523	754.615	1270.37	11267.3	2.41491	1.41032	67.8841	1	1	1120.53	88.9995	184.958	846.574	9.51212	1.71231	1.09132	964.208
46	0.00626025	0.555422	0.0383853	0.721961	3.1551	0.145883	13.6942	2.52601	15.984	3.01702	8.11646	1.13547	9.48456	1.30265	106.345	27.9514	299.785	101.347	12328.3	0.447823	0.344109	49.8085	1	1	59.8834	1.32203	35.5052	23.0562	17.44	1.3014	0.0932384	922.755
47	0.0170287	2.2517	0.172924	2.99406	4.78194	0.0905629	10.1492	1.31215	6.78614	0.906693	2.00384	0.213452	1.74106	0.306856	210.342	132.461	285.583	31.2155	11752.6	0.229778	0.0468683	67.0484	1	1	33.7276	5.43572	23.12	5.17191	0.951467	4.90264	0.463826	962.495
48	0.000405606	0.751168	0.0326323	0.841757	3.25942	0.187845	14.0399	3.02257	20.7194	3.77529	10.3661	1.33102	9.49971	1.30468	97.781	26.2364	273.725	135.94	12871.6	0.41299	0.152251	56.5976	1	1	69.132	1.62596	41.2292	26.2768	16.1608	2.71255	0.0958495	939.522
49	0.02	0.964789	0.0480005	0.801093	2.46009	0.111893	5.92035	0.642154	3.07399	0.413811	0.84074	0.0886985	0.673201	0.112824	92.8341	39.5118	200.204	14.4459	11730.5	0.178221	0.0329483	47.8299	1	1	16.1716	1.83388	12.2085	2.12927	1.16107	5.4091	0.197358	917.533
50	0.00462696	0.716971	0.031588	0.720883	2.53295	0.138327	13.0629	2.72706	17.4436	2.88001	7.35532	0.973807	7.82142	1.01794	108.965	18.0924	346.834	103.171	12559.3	0.536386	0.429426	47.1488	1	1	57.4274	1.47407	35.9048	20.0485	13.6008	1.24908	0.0521643	915.696
51	0.0472579	2.27439	0.105588	2.12283	3.52496	0.0934802	7.80542	1.23338	6.95543	1.04392	2.20805	0.274037	2.1067	0.232435	274.495	153.492	466.656	34.8591	13368.7	0.22815	0.0564643	55.2111	1	1	30.0279	4.55006	19.6127	5.86514	1.28902	4.0406	0.32892	936.231
52	0.00630899	0.703617	0.030601	0.727087	2.95248	0.172189	15.0698	2.73339	15.7639	2.14825	4.737	0.571306	4.37426	0.617206	117.417	30.056	316.444	79.4023	12696.1	0.747728	0.638212	53.223	1	1	50.6074	1.46761	36.6918	12.448	8.48181	1.1716	0.0949803	931.397
53	0.00630775	0.503887	0.0193208	0.372997	1.78621	0.162532	13.2703	3.11569	21.9444	3.97529	10.9696	1.63936	15.564	2.61586	105.495	15.6155	334.066	133.845	12828.6	0.593359	0.545485	52.0833	1	1	75.9458	0.902513	40.2791	34.7642	38.5193	1.08776	0.0467437	928.562
54	0.0228198	0.366313	0.0254158	0.349129	1.78405	0.0790106	9.16273	2.18528	12.6004	2.07498	5.181	0.737096	6.69311	1.02271	113.806	16.1036	410.877	73.0683	12840.2	0.388956	0.288576	42.2886	1	1	42.284	0.763678	25.8115	15.7089	20.5701	1.34785	0.0391934	901.945
55	0.0215752	3.13113	0.204801	4.34647	5.06285	0.0686108	10.0748	1.39661	8.03644	1.2073	2.61619	0.311371	2.39102	0.347304	230.361	123.553	414.911	40.0562	11990.5	0.174896	0.036269	53.3578	1	1	39.2165	7.70398	24.6393	6.87318	0.892159	4.8222	0.297781	931.729
56	0.00843279	2.73496	0.188811	3.57583	5.03543	0.0670301	10.1123	1.3938	7.04961	1.0129	2.67205	0.287975	2.59711	0.549404	220.67	112.578	432.678	33.3371	12120.4	0.143747	0.0238036	52.3269	1	1	37.2857	6.50803	23.6582	7.11944	1.09395	6.03885	0.260188	929.172
57	0.0405353	1.62681	0.0816492	1.79464	3.95903	0.190968	10.3226	1.71187	14.3035	3.95044	21.4013	5.33511	66.2648	12.0386	196.255	68.1867	471.333	148.974	12098.7	0.501937	0.528399	49.5079	1	1	143.022	3.54363	30.488	108.99	30.7566	0.949922	0.144668	921.972
58	0.0101384	0.344729	0.0124148	0.442506	1.29311	0.138074	11.1216	3.02647	25.1013	5.94754	21.9813	3.77036	40.8502	7.62649	165.735	20.966	553.748	203.299	13086.7	0.582768	0.764637	61.7412	1	1	121.666	0.809788	40.6806	80.1758	99.0084	0.76215	0.037862	951.207
59	0.0423479	6.0806	0.512612	7.3065	14.6408	0.423363	38.8805	7.18887	51.9055	11.5665	43.421	9.17123	105.2	18.3409	703.841	555.834	1323.69	351.637	36925.9	2.18685	0.853845	69.1051	1	1	314.68	13.9421	113.039	187.699	13.4628	2.56118	0.419913	966.683
60	0.0413067	1.75281	0.0989768	2.13529	8.2273	0.557593	52.1436	12.1711	82.1692	15.0151	35.5721	5.38654	40.9653	6.47204	276.092	45.8455	962.446	472.124	40323.5	1.89543	1.51539	62.0224	1	1	262.708	4.02838	155.269	103.411	25.6707	1.25079	0.0476344	951.824
61	0.0210231	3.0418	0.164408	2.90897	8.26542	0.325893	23.2603	3.37885	20.8981	3.85534	8.19861	1.24782	9.30927	1.05755	225.097	91.6658	620.856	123.668	37286	0.726632	0.368922	70.3316	1	1	85.9333	6.1362	56.1285	23.6686	3.85721	1.96961	0.147644	969.134
62	0.114767	5.39169	0.306421	6.89892	10.4911	0.283445	27.5378	4.84019	26.1718	5.27376	16.9707	3.64325	41.3753	7.84237	636.97	527.833	1157.09	167.589	37861.8	0.832347	0.438562	66.9653	1	1	157.142	12.7118	69.3243	75.1054	5.90833	1.8979	0.456174	962.323
63	1.9411	28.0451	1.39707	18.3676	22.2911	1.72319	81.6912	25.4001	320.038	117.657	561.82	138.718	1570.46	288.381	684.586	357.008	1736.89	3435.1	34134.5	4.09568	3.81449	71.8575	1	1	3177.93	49.7509	451.144	2677.04	53.8088	1.07372	0.205545	972.139
64	0.0540231	7.85627	0.24552	4.59213	10.7847	0.334072	33.8088	7.28457	71.9762	22.8144	97.7019	22.5137	242.517	43.7866	446.664	205.227	936.145	680.555	37643.6	2.25774	1.8114	77.0808	1	1	566.27	12.7479	124.188	429.334	33.6787	1.24641	0.219226	982.062
65	0.0551276	1.17207	0.057425	0.943585	3.1493	0.393279	30.7999	11.0864	93.6584	20.8767	71.9947	13.6415	140.694	23.2251	416.415	33.4529	1517.49	763.513	39654.9	1.6765	1.75911	60.5485	1	1	411.748	2.22821	139.087	270.432	121.367	0.953036	0.0220449	948.567
66	0.0347448	6.15831	0.447552	8.11761	14.3623	0.187895	28.1966	3.42163	14.5877	1.93478	4.0552	0.668803	4.88865	0.734441	770.869	690.987	1261.07	66.955	35552	0.649088	0.104645	78.2107	1	1	87.7962	14.7582	60.7561	12.2819	0.832206	6.20277	0.547938	984.14
67	0.020216	3.88213	0.142107	3.6609	8.95721	0.534853	26.8455	6.61295	46.8759	9.89458	26.8322	3.95237	27.7686	3.43745	201.47	90.0978	526.778	338.992	38389.6	1.01812	0.299871	61.2028	1	1	169.417	7.70535	89.8264	71.8852	9.32925	3.39521	0.171036	950.02
68	0.03375	4.41451	0.203976	4.31055	13.1405	0.547755	33.7374	6.42637	47.5316	9.36068	27.8552	3.95005	30.1851	4.12273	258.935	153.493	624.221	314.196	37042.8	0.677385	0.14328	77.1604	1	1	185.82	8.96279	101.384	75.4738	8.42079	4.72771	0.245896	982.21
69	0.077555	11.2944	0.254863	5.43111	10.3712	0.360692	35.6075	8.87866	92.5738	33.127	153.581	37.065	414.292	73.3994	860.682	526.592	1755.3	1032.73	38016	2.68488	2.7674	67.6698	1	1	876.314	17.058	147.792	711.464	41.7086	0.970183	0.300001	963.771
70	0.0327797	3.7775	0.338137	6.94665	15.853	0.394383	46.817	8.89971	70.8658	16.03	49.412	8.19175	65.3632	9.28808	919.554	530.785	2250.78	522.808	42045.2	0.930643	0.395302	87.994	1	1	302.21	11.0951	142.83	148.285	13.365	2.35426	0.235822	1001.23
71	0.026883	2.20476	0.107068	2.42533	8.3401	0.394265	33.7313	6.64351	44.5331	8.0455	21.2717	3.30487	28.2582	4.35297	292.745	72.2507	947.88	264.828	39753.1	1.66785	1.68111	77.3862	1	1	163.64	4.76404	93.6422	65.2333	13.6928	0.992113	0.0762235	982.626
72	0.00667018	4.57108	0.0961587	2.04166	6.94018	0.241365	35.4293	7.56541	48.7162	10.2327	35.1685	6.75001	74.6759	12.9932	271.956	75.0482	768.934	333.281	40499.1	2.49483	1.73299	65.4947	1	1	245.428	6.71556	98.8924	139.82	20.8203	1.43962	0.0976003	959.264
73	0.01995	1.6566	0.0908374	1.12418	4.77758	0.480325	29.2507	8.97178	88.4339	27.1351	122.932	30.6253	339.724	63.1913	333.889	56.0941	1144.93	850.913	39529.2	2.08838	1.83671	68.7378	1	1	718.413	2.89157	131.914	583.608	201.831	1.13702	0.0489933	965.942
74	0.0802802	4.69323	0.365724	7.03789	14.4658	0.252736	38.7118	7.61586	49.1212	8.30014	19.2244	2.42269	16.1758	1.71178	401.565	141.688	949.737	283.071	36876.4	0.413046	0.0850959	59.9868	1	1	170.179	12.1771	110.167	47.8348	3.92825	4.85389	0.149186	947.31
75	0.205478	6.78662	0.220608	2.7528	6.55512	0.80027	30.8091	10.3738	132.561	49.7246	254.357	68.767	813.805	154.076	469.929	109.442	1445.66	605.98	38669.9	2.20174	2.40538	69.4492	1	1	1531.79	9.96551	181.099	1340.73	134.537	0.915342	0.0757038	967.374
76	0.0201459	7.50736	0.392734	8.62586	11.7531	0.211473	24.068	3.94512	18.8356	2.84461	5.61369	0.728465	5.01981	0.72572	793.713	851.508	885.901	80.7958	38341.6	0.82238	0.170473	92.6173	1	1	90.2916	16.5461	58.8132	14.9323	0.902466	4.82411	0.961177	1008.8
77	0.020467	1.83457	0.0829221	1.93374	6.06149	0.596123	36.0323	8.90724	62.2112	11.8562	28.7721	3.81806	28.6838	3.82301	247.736	36.6845	900.088	376.992	40038.2	2.42077	2.13016	71.0749	1	1	194.633	3.8717	113.808	76.9532	19.8758	1.13643	0.0407566	970.604
78	0.0270606	6.83203	0.436907	7.70186	13.204	0.29562	30.7444	6.93453	63.7549	16.4139	55.2398	9.22413	84.3073	11.0581	262.798	88.0552	817.173	514.781	39966.8	0.531623	0.0928629	74.0109	1	1	306.175	14.9979	114.933	176.243	11.7512	5.72482	0.107756	976.296
79	0.0335495	5.04809	0.326502	5.86194	15.2734	0.72852	37.9723	5.80544	26.516	3.5526	7.15637	0.923736	6.4473	0.854799	276.917	166.563	683.825	115.093	37505.9	0.566353	0.0733062	64.5587	1	1	116.5	11.2701	86.2956	18.9348	1.68009	7.72585	0.243576	957.289
80	0.0474868	2.46257	0.128967	2.66874	8.29064	0.69399	47.7406	11.2015	94.5165	25.9185	115.567	28.2612	326.342	57.6013	448.741	93.0731	1522.55	835.972	40525.2	3.91459	4.46902	57.9429	1	1	721.441	5.30777	162.443	553.69	104.317	0.875941	0.0611299	942.656
81	0.0495204	19.831	0.252884	4.66043	10.1523	0.661665	32.951	5.98029	42.9451	12.1771	50.5827	11.9799	134.921	25.7499	417.124	237.628	704.766	394.432	37186.6	1.81637	0.631833	77.4015	1	1	352.895	24.7939	92.6904	235.411	9.49472	2.87477	0.337173	982.655
82	0.0813793	6.2316	0.541669	8.53274	15.7685	0.368183	36.8757	5.35552	34.5339	7.42699	27.3142	6.01149	69.3884	13.2263	583.167	161.676	1689.68	223.017	39958.1	1.44321	0.726948	71.7292	1	1	231.657	15.3874	92.9019	123.367	8.01744	1.9853	0.0956844	971.888
83	0.0945243	4.80568	0.357377	5.48133	11.6971	0.501677	42.0802	7.18465	41.8248	8.25371	25.334	4.98443	53.2733	10.0181	236.612	151.162	593.268	246.003	38277.4	2.40328	1.5706	53.8741	1	1	215.891	10.7389	103.288	101.864	9.48547	1.53017	0.254795	932.995
84	0.0331195	3.49548	0.0958026	1.87975	5.16116	0.449169	24.1284	9.42487	136.509	57.2195	314.476	85.1144	1047.21	201.118	680.101	138.102	2149.38	828.068	39397.7	4.53848	4.99693	51.7308	1	1	1886.31	5.50415	175.672	1705.13	309.791	0.908255	0.064252	927.675
85	1.35329	4.94457	0.276559	3.84425	9.06238	0.494826	34.0819	7.35936	54.7192	14.0998	60.0145	13.9333	156.576	27.9784	399.678	100.449	1188.07	464.276	38646	1.31081	1.66052	51.7312	1	1	388.738	10.4187	105.718	272.602	26.1647	0.789398	0.0845481	927.676
86	0.00711768	4.10439	0.260159	5.80016	17.6638	0.849397	42.7505	6.34821	33.7905	5.51521	12.6829	1.8051	12.2008	1.68948	258.075	103.803	726.991	182.08	37870.8	0.527332	0.0832273	55.8042	1	1	145.468	10.1718	101.402	33.8934	3.33209	6.33605	0.142784	937.646
87	0.00710445	3.62064	0.243487	3.3829	9.98478	0.354221	30.7352	5.2179	25.2033	4.11736	8.4413	1.07067	7.32078	0.97241	326.068	110.748	919.041	128.322	39172.7	0.485295	0.102636	61.3315	1	1	100.672	7.25413	71.4954	21.9225	3.02207	4.7283	0.120504	950.305
88	4.21767	12.5111	1.33422	6.64589	6.76004	0.484039	36.4688	10.3221	84.671	18.4583	61.3589	14.0922	161.091	29.2425	496.165	73.3676	1824.85	652.307	42373.3	1.52285	2.25071	57.2282	1	1	447.658	24.7089	138.706	284.243	11.5037	0.676609	0.0402048	940.998
89	3.64855	9.95069	0.744481	4.44034	6.28421	0.593041	36.283	10.6287	87.988	23.2643	95.5833	22.0023	239.675	43.2725	478.948	111.727	1663.44	735.214	39907.6	2.41741	2.75608	59.6	1	1	584.359	18.7841	141.777	423.798	22.5616	0.877118	0.0671658	946.439
90	0.0140349	2.37032	0.165823	2.95739	11.1756	0.711051	38.7119	5.74759	28.135	4.02295	8.09294	1.00125	6.03087	0.786062	230.852	74.3548	711.341	127.919	36810.4	0.674789	0.144949	53.2532	1	1	109.923	5.50756	84.4811	19.9341	3.6194	4.65537	0.104528	931.472
91	0.144074	3.91854	0.29296	5.06083	11.8044	0.384046	29.0262	5.30749	33.2925	7.23688	21.1437	3.72276	31.2178	4.72472	316.704	134.19	848.625	215.068	40631.7	0.596286	0.174211	78.5504	1	1	157.277	9.4164	79.8147	68.0458	7.22631	3.42279	0.158126	984.761
92	0.00606476	3.39641	0.142301	3.06317	7.24468	0.394587	23.4396	5.16472	43.583	12.7307	57.866	14.0281	159.933	30.241	281.097	74.3043	862.18	426.614	37970.6	0.890348	0.635583	69.9039	1	1	361.233	6.60795	79.8266	274.799	41.5861	1.40084	0.0861819	968.283
93	0.00494981	3.83987	0.428735	7.26624	14.7525	0.405105	37.4126	7.01227	45.4275	7.25818	18.5908	2.54228	18.8894	2.36349	403.393	147.995	1171.71	232.963	42710.8	0.542892	0.206255	72.8752	1	1	166.194	11.5398	105.01	49.6442	4.302	2.63214	0.126306	974.115
94	0.331373	1.72417	0.144512	1.42602	4.60118	0.460858	31.4496	9.60008	75.1039	16.7778	68.6744	17.2207	210.994	41.4759	464.619	49.7324	1755.89	565.895	40549.2	1.55275	1.41673	53.1355	1	1	479.985	3.62608	121.216	355.143	97.9414	1.09601	0.0283232	931.181
95	0.0409391	4.46963	0.270873	5.47469	13.4607	0.773899	34.4937	5.89983	29.3398	4.60465	10.4772	1.37937	8.80172	1.28226	239.953	102.585	698.884	150.608	37475.8	0.474864	0.0658695	81.441	1	1	120.769	10.2561	83.9679	26.5452	2.58823	7.20917	0.146784	989.956
96	0.02	2.63606	0.129322	3.58514	10.8858	0.5461	32.0644	4.6867	22.0737	2.97917	5.66496	0.758915	4.34245	0.617157	223.175	73.6884	668.565	98.1054	37255.1	0.56718	0.10317	66.2784	1	1	90.9899	6.37051	70.2567	14.3627	2.25455	5.49753	0.110219	960.901
97	2.16797	10.0567	0.437496	2.65795	5.7683	0.475461	35.0767	8.40844	64.456	17.5308	77.9259	19.8349	256.925	49.1964	426.944	102.574	1534.67	568.112	39781.4	2.94326	3.26005	54.3883	1	1	550.917	15.3201	114.185	421.413	27.5072	0.902827	0.0668376	934.247
98	0.0133401	4.23193	0.234442	4.2836	11.6089	0.556304	36.3051	5.83805	31.1744	5.68241	17.8304	3.78565	46.8876	8.3972	288.133	98.1023	741.983	180.43	37736.5	1.24645	0.46953	64.2552	1	1	176.829	8.76331	85.4827	82.5833	9.42376	2.65468	0.132216	956.644
99	0.201484	3.72584	0.245785	3.65089	8.75094	0.55492	28.8566	4.14559	19.7203	2.70073	6.28821	0.881858	6.15991	0.768781	197.591	64.7987	661.293	97.7258	39357.4	0.653215	0.344763	60.8458	1	1	86.6519	7.824	62.0284	16.7995	2.14717	1.89468	0.0979879	949.229
100	4.30814	170.317	1.2456	11.6027	23.3185	2.47137	115.094	34.9601	422.165	145.866	650.913	146.048	1536.09	270.358	34.03	143.467	1554.12	461.876	38684.3	35.9889	8.97084	64.3372	1	1	3534.75	187.473	598.009	2749.27	14.6649	4.01177	0.0923143	956.819
101	0.00668861	1.26579	0.0312254	1.38154	5.1678	0.477789	29.8585	6.33299	39.904	6.69864	15.9268	2.43103	20.9412	3.27995	307.224	34.8889	1081.81	210.092	41015	2.29985	2.0611	69.378	1	1	133.704	2.68524	81.7411	49.2777	18.3513	1.11584	0.0322504	967.231
102	0.0262105	2.94913	0.160412	3.30877	10.8958	0.666652	35.3469	5.47237	31.5002	5.78808	18.2464	4.31652	46.0636	8.32093	264.393	73.9761	813.59	182.363	37324	0.814563	0.380311	74.7054	1	1	173.062	6.44452	83.8819	82.7356	12.8381	2.14183	0.0909256	977.616
103	0.0197756	2.2717	0.136182	2.23945	6.74645	0.40915	24.4641	4.29137	20.5602	3.28433	6.15688	0.781771	5.38794	0.793033	164.96	52.3092	493.186	94.6123	37556.1	0.919121	0.413938	75.9327	1	1	77.5423	4.66711	56.4713	16.4039	3.5148	2.22043	0.106064	979.927
104	0.0267988	1.58976	0.0769074	1.65825	7.21532	0.386737	33.685	7.14718	33.862	4.47198	11.6285	2.1649	22.862	4.30031	219.521	35.3477	752.018	150.868	40672.5	1.56493	1.03264	69.1855	1	1	131.076	3.35171	82.2963	45.4277	13.5536	1.51546	0.0470038	966.844
105	0.631113	2.75724	0.169378	1.91244	6.62918	0.553794	37.3511	8.96641	63.3985	13.1704	51.0424	11.9013	142.717	27.507	372.143	45.14	1340.18	443.098	40629.4	2.26163	2.20917	71.3806	1	1	368.707	5.47017	116.899	246.338	45.033	1.02375	0.0336821	971.205
106	14.6797	37.6054	3.94931	15.1575	7.55074	0.868844	47.0388	14.8514	119.051	28.8328	109.165	26.2452	282.195	50.926	605.127	96.7534	2009.55	906.824	41293.6	2.34163	2.24939	97.3952	1	1	758.117	71.3919	189.36	497.365	6.96668	1.041	0.0481468	1016.32
107	6.64411	20.9902	2.51369	11.2535	9.95065	0.879218	58.4623	12.7332	64.3071	8.52872	18.0629	2.17532	17.2988	2.64997	467.338	52.4064	1707.98	278.409	43481.8	2.56876	3.86526	87.1264	1	1	236.45	41.4015	146.332	48.7157	1.17666	0.664576	0.0306833	999.772
108	0.02	1.54412	0.0502394	1.20515	5.95063	0.347761	31.7358	6.87158	37.9482	5.94101	12.3124	1.61392	12.6953	2.05406	415.168	46.7749	1515.21	180.986	41440.8	2.61614	2.8223	69.5329	1	1	120.29	2.81951	82.8539	34.6167	12.2776	0.926953	0.0308703	967.542
109	0.0662187	4.08519	0.248612	4.68548	9.68621	0.654725	31.1533	4.89735	25.2272	3.67188	7.88722	1.03186	7.63952	1.17283	268.731	111.915	716.925	114.777	37422.5	0.516962	0.0916457	68.1708	1	1	102.108	9.0855	71.6188	21.4033	2.35577	5.64088	0.156105	964.792
110	0.519921	3.86753	0.275833	2.90972	6.86708	0.456345	30.8024	6.5629	50.3546	12.9332	56.1203	14.253	175.228	33.2423	317.673	74.367	1051.95	409.199	38956.6	1.48881	1.60057	68.8928	1	1	394.394	7.57301	95.0434	291.777	38.5286	0.930179	0.0706942	966.255
111	0.062	3.19	0.065	0.38	0.92	1.43	15.6	4.51	24.4	4.26	10.2	1.49	8.77	1.43	50.6	7.54	884	124	12721	0.5	0.14	121	1	1	76.707	3.697	46.86	26.15	7.0733	3.57143	0.00852941	1049.81
112	3.13303	78.1698	1.74262	16.1783	12.4742	3.0262	67.8615	22.5261	346.445	128.612	680.991	136.318	1607.57	255.865	147.685	312.333	294.592	4758.31	30130.7	8.43058	2.97179	22.571	1	0.5	3360.92	99.2237	452.333	2809.36	28.3134	2.83687	1.06022	910.16
113	0.159128	72.3539	0.482835	5.91937	10.2613	2.71972	68.439	23.1106	341.182	124.195	654.746	131.08	1564.08	245.116	164.719	421.915	365.417	4679.48	29653	7.78646	2.52886	22.6864	1	0.5	3243.84	78.9152	445.712	2719.22	34.4575	3.07904	1.15461	910.806
114	0.261145	143.124	0.469123	6.99708	13.7094	2.56813	96.8187	34.3561	492.61	176.18	943.749	188.916	2230.5	347.36	626.723	1601.83	1421.65	6828.73	36046.8	42.0432	13.0467	22.7972	1	0.5	4677.61	150.851	640.063	3886.7	25.7651	3.22251	1.12674	911.424
115	0.216289	191.868	0.317301	6.27775	20.3235	3.92825	139.318	50.0754	40.8	256.733	1314.68	253.568	2914.52	437.93	34.03	52.41	2422.85	516.63	36215.3	67.4857	20.2011	31.784	1	0.5	5630.56	198.68	254.445	5177.43	26.0592	3.34069	0.0216315	955.175
116	0.026395	26.4668	0.117333	2.7606	7.57585	1.0145	32.7342	10.1455	150.626	51.4913	283.234	53.9783	696.347	111.591	44.1448	177.772	613.118	2002.59	32098.4	6.73381	3.94849	45.8958	1	0.5	1428.11	29.3711	202.096	1196.64	40.7421	1.70541	0.289947	1007.47
117	0.429325	193.275	0.516397	10.2587	20.2083	4.56729	130.028	46.1451	40.8	240.008	1261.46	240.03	2816.84	460.096	918.341	52.41	2211.15	516.63	34220.9	61.1326	14.2181	22.7296	1	0.5	5464.66	204.479	241.748	5018.44	24.5425	4.29965	0.0237026	911.048
118	0.0403954	91.4734	0.189411	4.81497	10.7303	2.44185	74.6624	29.4978	458.537	172.028	911.422	183.972	2211.24	352.012	289.723	654.872	782.907	6485.8	31913.4	25.0577	8.10747	31.245	1	0.5	4503.06	96.5182	575.87	3830.67	39.6886	3.09069	0.836463	952.844
119	0.039	6.96665	0.0544994	0.826343	2.21471	0.297304	6.91688	2.60442	46.2678	17.1308	76.8435	18.447	177.319	33.7766	22.4843	31.2629	53.8945	507.074	11758.8	19.25	4.29	45.2573	1	0.5	389.704	7.8865	58.3011	323.517	41.0216	4.48718	0.580077	1005.39
120	0.136556	153.499	0.812672	22.0444	32.344	10.8341	214.317	73.8132	40.8	344.394	80.1	309.28	3367.43	41.89	762.024	1460.22	1020.03	516.63	22356.9	13.1835	4.76597	20.9204	1	0.5	4691.7	176.493	372.108	4143.1	23.4746	2.76617	1.43155	900.616
121	0.0693332	70.6023	0.513071	7.31678	14.212	3.60778	62.9422	23.3052	315.331	120.58	593.917	117.506	1321.31	210.826	98.6899	231.82	244.127	4041.98	27654	8.34484	2.66598	22.5156	1	0.5	2862.04	78.5015	419.398	2364.14	30.1158	3.13013	0.949591	909.848
122	0	53.6889	0.675861	7.97805	18.8402	3.43036	106.491	33.4523	470.347	167.336	841.392	163.982	1853.79	299.628	208.539	554.854	882.68	5887.43	31419.9	7.63076	2.84828	62.7625	1	0.5	4021.03	62.3428	632.561	3326.12	53.3522	2.67907	0.628601	1055.65
123	0.0521428	32.9209	0.309485	5.85133	11.5813	2.36031	61.8575	20.408	282.432	104.723	517.168	105.211	1173.07	192.377	103.875	188.877	354.039	3591.94	26796.3	3.21116	1.86406	29.7362	1	0.5	2510.32	39.1339	378.639	2092.55	53.4715	1.72267	0.533492	946.15
124	0.0270418	25.5301	0	0.606546	2.39962	0.291374	21.7505	9.74099	153.618	61.0942	355.872	80.3204	991.206	169.638	207.149	351.37	1091.22	2365.26	32503.6	21.9568	7.34294	72.1801	1	0.5	1872.1	26.1637	187.801	1658.13	63.3754	2.99019	0.321998	1078.37
125	0.202021	292.391	0.998053	12.9058	24.3533	4.36857	158.124	54.4934	40.8	255.561	1230.87	243.502	2591.55	427.319	707.172	1646.06	983.123	516.63	28806.9	25.2686	7.18924	25.9026	1	0.5	5337.44	306.497	282.139	4748.8	15.4938	3.51477	1.67432	927.863
126	0.952206	95.6185	0.600866	8.34855	14.5275	2.01272	92.3572	34.9942	501.441	191.506	968.187	204.276	2283.99	387.264	648.915	1645.23	2162.39	6585.69	32827.8	40.2676	13.2528	51.2634	1	0.5	4786.07	105.52	645.332	4035.22	38.2412	3.03843	0.760838	1024.09
127	0.31814	115.023	0.605334	10.0244	18.7432	3.6617	110.211	38.7274	528.838	185.972	893.762	173.239	1884.11	307.617	631.178	1419.28	883.565	6264.81	28432	18.941	5.83367	26.0544	1	0.5	4270.85	125.971	700.181	3444.7	27.3451	3.24684	1.60632	928.626
128	0.0780713	84.0413	1.08867	18.4794	32.7943	7.12363	179.202	54.7554	40.8	232.502	1093.67	211.891	2235.71	360.556	202.896	443.025	425.274	7780.94	26644.2	7.10991	2.20353	21.8931	1	0.5	4552.69	103.687	314.676	4134.33	39.873	3.2266	1.04174	906.309
129	0.0196923	85.6062	0.232082	4.75975	8.98162	3.33421	60.5346	20.5805	296.351	111.879	553.132	117.307	1312.03	234.273	393.419	924.279	670.649	3896.08	26019.7	11.3358	5.33647	24.378	1	0.5	2809.02	90.6178	389.782	2328.62	25.6972	2.12421	1.37819	919.998
130	0.0391902	61.27	0.20243	2.94051	8.63525	2.09245	50.0167	17.2163	255.678	102.267	546.532	120.23	1392.54	260.269	134.916	275.623	339.208	3702.98	27251.3	8.04598	3.43312	40.965	1	0.5	2819.93	64.4521	333.639	2421.84	37.5758	2.34363	0.81255	990.821
131	0	14.4993	0.294335	2.82049	7.00843	1.59904	37.8088	11.4536	169.773	67.5779	347.157	72.2708	829.172	147.833	629.839	1175.54	1325.48	2301.65	27849.6	4.26728	1.53764	30.2499	1	0.5	1709.27	17.6141	227.643	1464.01	83.1156	2.77521	0.886879	948.458
132	0.0683503	46.0383	0.517497	6.62391	14.8373	4.93674	87.8701	32.1043	447.568	166.465	818.732	164.965	1795.54	309.195	100.612	203.42	196.106	5669.18	24766.5	5.8568	1.65969	28.4675	1	0.5	3895.46	53.2481	587.316	3254.9	61.1271	3.52884	1.03729	940.313
133	1.16	49.1	0.43	3.63	4.82	0.64	32.7	13.8	193	81.3	397	86.6	775	135	641	932	1838	2710	13386	26.3	19.8	26.6	1	0.5	1774.18	54.32	244.96	1474.9	27.1521	1.32828	0.507073	931.34
134	0.14	5.97	0.079	0.75	0.8	0.29	6.2	3.03	61.8	40.9	303	88.8	953	196	516	296	1898	1638	11562	22.4	11.4	46.9	1	0.5	1660.76	6.939	72.12	1581.7	227.944	1.96491	0.155954	1010.69
135	0.63	9.08	0.35	2.05	1.46	0.5	6.05	2.58	36.7	18.7	120	35.3	416	103	186	109	1741	668	13706	10.9	12.2	29.8	1	0.5	752.4	12.11	47.29	693	57.2254	0.893443	0.0626077	946.438
136	0.15	29.1	0.41	5.59	10.6	0.77	65.8	23.4	296	115	520	104	888	161	339	526	951	3794	8537	10.5	3.35	22.8	1	0.5	2219.82	35.25	396.57	1788	50.7234	3.13433	0.553102	911.44
137	0.026	3.92	0.023	0.27	0.74	0.48	5.7	2.15	22.6	6.27	22.1	3.78	29.9	5.62	14	5.1	332	201	13175	1.45	0.63	65.7	1	0.5	103.579	4.239	31.67	67.67	15.9637	2.30159	0.0153614	1063
138	0.14	2.82	0.061	0.55	0.84	0.55	10.2	4.63	68.4	29.8	164	44.4	508	114	89	27.47	441	955	12545	3.39	3.09	29.3	1	0.5	948.391	3.571	84.62	860.2	240.885	1.09709	0.0622902	944.166
139	0.063	1.57	0.023	0.18	0.69	0.33	4.21	1.95	23	6.97	24.7	4.34	36.5	6.15	9.47	1.3	220	215	9436	0.79	0.4	45.4	1	0.5	110.676	1.836	30.18	78.66	42.8431	1.975	0.00590909	1005.86
140	0	0	0	0.08	0.06	0.01	0	0.01	0.1	0.3	7.7	5.2	81	9.4	57.7	0.0044	426.57	70	13053	134.2	6.6	34.9	1	0.5	103.86	0.08	0.18	103.6	1295	20.3333	1.03148e-05	968.076
141	4.15	0.1	0.93	3.51	0.88	0.37	0.5	0.12	1	0.6	7.1	3.8	50	6.5	39.9	0.02	1111.4	86	11709	46.6	2.6	38.26	1	0.5	79.56	8.69	2.87	68	7.82509	17.9231	1.79953e-05	981.022
142	0	0	0.01	0.05	0	0.01	0.1	0.05	1.1	2.4	44.3	22.6	315	49.4	45.8	0.0085	1514.34	326	11453	48.2	3.1	28.9	1	0.5	435.02	0.06	1.26	433.7	7228.33	15.5484	5.61301e-06	942.325
143	0	0	0.01	0	0.04	0.01	0.1	0.01	0.1	0.1	0.7	0.6	13	2	31.1	0.01	68.49	0	18365	282.3	23.2	43.93	1	0.5	16.67	0.01	0.26	16.4	1640	12.1681	0.000146007	1001
144	0.05	102.3	0.13	2.77	4.24	1.36	19.9	7.11	87.3	34.9	168.3	40.5	435	73.6	33.8	407.96	257.68	1080	7119	12.7	1.9	23.8	1	0.5	977.46	105.25	119.91	752.3	7.14774	6.68421	1.5832	916.915
145	0.01	0	0.01	0	0.06	0.05	0.4	0.25	4.8	7.5	137.1	68.4	929	123.5	46.4	0.01	535.87	1130	12821	271.1	8.1	57.3	1	0.5	1271.08	0.02	5.56	1265.5	63275	33.4691	1.86612e-05	1041.26
146	0.02	0	0.01	0.06	0.04	0.03	0.1	0.08	1	0.8	12.7	7.7	123	18	48.7	0.02	741.03	86	13294	122.9	5.7	40.7	1	0.5	163.54	0.09	1.25	162.2	1802.22	21.5614	2.69895e-05	989.883
147	0.84	0.5	0.42	2.73	1.69	0.55	2.9	0.69	9.2	7.5	96.4	41.2	523	72.3	49.5	0.19	2494.29	750	9236	61.5	3.6	32.3	1	0.5	759.92	4.49	15.03	740.4	164.9	17.0833	7.6174e-05	957.377
148	0.06	0.2	0.03	0.36	0.93	1.07	13.4	10.45	195.9	92.3	457.6	100.9	954	149.4	26.8	0.26	787.61	4981	25189	1.94	123.9	126.7	1	0.5	1976.6	0.65	221.75	1754.2	2698.77	0.0156578	0.000330113	1178.23
149	0.02	0.2	0.02	0.08	0.45	0.33	3.9	2.28	41.5	19.4	98.9	25	261	40.4	29.6	0.22	711.02	1171	33067	1.94	255.8	127.2	1	0.5	493.48	0.32	48.46	444.7	1389.69	0.00758405	0.000309415	1178.98
150	0.84	0.3	0.39	2.44	1.49	0.68	5.5	3.36	48.3	23.2	110.3	26.1	253	36.4	34.1	0.19	797.49	1253	26267	585.4	112.4	54.7	1	0.5	512.3	3.97	59.33	449	113.098	5.20819	0.000238248	1034.05
151	0.24	0.2	0.13	1.01	0.49	0.29	0.6	0.28	2.6	1.3	15.8	8	116	17	25.5	0.34	1037.97	147	22037	72.1	10.6	23.2	1	0.5	163.94	1.58	4.26	158.1	100.063	6.80189	0.000327562	913.652
152	0.01	0.1	0.02	0.04	0.07	0.01	0.1	0.01	1	4.7	126	67.1	940	154.4	84.9	0.08	1044.15	615	11180	106.2	5.1	40.1	1	0.5	1293.56	0.17	1.19	1292.2	7601.18	20.8235	7.66173e-05	987.743
153	0.01	0.1	0	0.07	0.14	0.03	0.1	0.01	0.7	3.3	77.2	39.4	563	91.8	68.8	0.05	985.13	432	13222	81.6	4.8	42.6	1	0.5	775.86	0.18	0.98	774.7	4303.89	17	5.07547e-05	996.503
154	0.01	0	0	0.06	0.14	0.11	1.3	0.82	14.8	7.9	50.9	17.4	249	46	50.3	0.03	258.08	430	22280	447.2	20.7	43	1	0.5	388.44	0.07	17.17	371.2	5302.86	21.6039	0.000116243	997.868
155	0.07	0.4	0.04	0.09	0.2	0.02	0.3	0.08	2.4	7.7	206.4	117.9	1689	274.7	41.6	0.51	911.98	950	10581	55.9	3.6	36.9	1	0.5	2299.3	0.6	3	2295.7	3826.17	15.5278	0.000559223	975.893
156	0.01	0	0.01	0.08	0.08	0.02	0.2	0.1	5.2	13.3	339.2	225.7	3835	41.89	61.9	0.01	124.12	1358	7433	22.7	1.2	27.8	1	0.5	4460.79	0.1	5.6	4455.09	44550.9	18.9167	8.05672e-05	937.16
157	0.00873427	1.17563	0.0763663	1.3988	2.84431	0.116643	8.34404	1.43677	9.10059	1.52972	3.68661	0.432401	2.90322	0.409313	254.226	18.636	251.026	53.1997	12952.1	0.240054	0.0528677	63.2033	1	1	33.4631	2.65953	21.8423	8.96127	3.3695	4.54066	0.0742392	954.39
158	0.00211842	0.706057	0.0211679	0.678012	3.15444	0.178568	16.7932	3.42145	15.7926	1.82182	3.16755	0.31552	1.99084	0.37036	181.293	25.942	587.23	64.0656	13973.9	0.80082	0.828554	49.8032	1	1	48.4136	1.40735	39.3402	7.66609	5.44716	0.966527	0.044177	922.741
159	0.0171754	0.815343	0.0565757	0.671813	2.36151	0.154154	12.5534	3.04894	22.7033	4.43043	13.8003	2.50662	27.9181	4.72966	233.077	40.9605	728.824	164.876	12765.5	0.626997	0.614736	46.5963	1	1	95.7674	1.56091	40.8213	53.3852	34.2014	1.01995	0.0562008	914.191
160	0.00215185	0.513135	0.0314226	0.618615	2.15091	0.211002	14.9244	3.59975	19.9509	2.40898	4.71319	0.477655	3.6832	0.419522	194.507	17.3329	664.336	88.341	13908.7	0.559894	0.641494	50.5065	1	1	53.7048	1.16532	40.8369	11.7026	10.0423	0.872796	0.0260906	924.559
161	0.00889369	0.585632	0.0250294	0.455734	2.34319	0.156326	15.8139	4.08504	21.0097	2.51331	4.7952	0.570891	4.83645	0.724429	233.019	22.1228	805.883	89.0079	14142.1	0.428229	0.648467	51.6433	1	1	57.9238	1.07529	43.4082	13.4403	12.4992	0.660372	0.0274517	927.454
162	0.361123	1.41683	0.118391	1.02147	2.14943	0.132702	16.2746	4.25936	25.1878	3.12935	6.78372	1.0572	9.87732	1.62162	267.179	27.2838	919.944	111.626	13413.9	0.489589	0.66653	49.4556	1	1	73.391	2.91782	48.004	22.4692	7.7007	0.734535	0.0296581	921.836
163	0.00428673	1.95832	0.0724618	1.14406	2.61962	0.121602	6.82403	0.897869	3.85773	0.491242	1.04808	0.105649	0.888854	0.0817311	284.509	21.8813	638.147	19.5633	13258	0.259071	0.059618	50.2721	1	1	20.1155	3.17913	14.3209	2.61556	0.822728	4.34552	0.0342888	923.955
164	0.0104694	0.576911	0.0509554	1.11261	4.76294	0.49776	34.5387	9.84623	62.1656	8.48634	17.5385	1.90102	13.5585	1.62599	288.726	25.2792	1023.48	298.577	13980.5	0.679507	0.655748	51.9624	1	1	156.672	1.75095	111.811	43.1103	24.6212	1.03623	0.0246993	928.258
165	0.0176207	1.60321	0.0507654	0.934421	2.62273	0.115057	8.24059	0.999006	4.48325	0.611279	1.17954	0.149419	1.17163	0.142148	156.595	78.1796	282.404	23.5242	12523.3	0.256576	0.0708495	51.987	1	1	22.3207	2.60602	16.4606	3.25402	1.24865	3.62142	0.276836	928.32
166	0.00887052	0.509125	0.0408875	0.576594	2.29716	0.213785	16.2771	4.07655	23.5294	2.83394	5.37164	0.56997	3.71194	0.501569	184.359	17.7219	627.275	102.697	13980.8	0.547075	0.601097	53.166	1	1	60.5185	1.13548	46.3939	12.9891	11.4393	0.910127	0.0282522	931.256
167	0.0197601	0.5432	0.0365647	0.544087	2.65432	0.18864	17.7526	4.77959	27.828	3.52997	6.40033	0.672108	4.98532	0.739045	236.209	23.9628	826.122	127.476	13961.2	0.355674	0.456005	45.298	1	1	70.6735	1.14361	53.2031	16.3268	14.2765	0.779978	0.0290063	910.597
168	0.0886589	1.37081	0.139512	1.46942	2.52597	0.18219	9.51846	1.65236	8.88028	1.28813	2.96479	0.428807	3.62571	0.46995	253.898	145.69	538.515	48.7576	13741.9	0.765499	0.630336	57.1484	1	1	34.6051	3.0684	22.7593	8.77739	2.86057	1.21443	0.27054	940.812
169	0.0087194	1.76081	0.0602701	0.914574	2.81227	0.159981	6.64194	0.790777	3.52402	0.517734	1.19619	0.109459	0.834971	0.0946749	231.734	113.855	455.807	19.6838	12719.5	0.175655	0.0523884	53.6894	1	1	19.4264	2.74437	13.929	2.75303	1.00316	3.35294	0.249787	932.543
170	0.00875587	1.87499	0.0537945	0.838497	2.45186	0.117122	5.91738	0.816558	4.02736	0.584039	1.29288	0.134518	1.00015	0.137454	318.683	123.452	754.336	22.6238	13029.3	0.228696	0.0402478	53.7429	1	1	19.2554	2.77604	13.3303	3.14905	1.13437	5.68221	0.163657	932.674
171	0.38345	4.57103	0.125945	0.979586	2.18672	0.251913	14.0293	4.18408	38.7081	11.3612	57.5517	14.1215	194.688	38.9113	323.207	73.5117	921.5	421.283	12857.9	1.54338	1.13746	50.3456	1	1	382.054	6.06001	59.36	316.634	52.2497	1.35687	0.079774	924.145
172	0.101092	3.49576	0.0677108	0.578788	1.99749	0.216943	13.9609	4.37585	39.3102	8.70907	35.8594	7.76206	92.4406	16.2949	288.723	38.2879	888.575	341.209	13647.7	1.1361	1.00403	57.8034	1	1	225.171	4.24335	59.8614	161.066	37.9573	1.13153	0.0430891	942.333
173	0.00430152	0.533617	0.0379795	0.83347	3.41185	0.292705	25.3253	7.06267	46.8342	6.38299	13.1914	1.45838	11.0752	1.23121	266.835	19.65	965.46	232.231	14013.3	0.639373	0.692772	55.5363	1	1	117.675	1.40937	82.9268	33.3392	23.6554	0.922921	0.020353	937.008
174	0.0368999	0.988537	0.0531167	1.05139	2.98518	0.193721	13.9893	2.27026	10.1431	1.19255	2.91923	0.438571	4.12	0.706609	156.898	46.3903	405.351	47.3261	13418.7	1.08027	0.732337	56.1383	1	1	41.0884	2.12994	29.5815	9.37696	4.40245	1.47509	0.114445	938.439
175	0.0286327	0.624328	0.0329712	0.62759	2.74641	0.178531	24.4687	9.00837	67.7244	9.88286	23.1046	2.77308	20.6848	2.61889	558.384	28.081	2399.57	380.953	13420.2	0.601327	0.95081	46.2452	1	1	164.504	1.31352	104.126	59.0642	44.9663	0.632437	0.0117025	913.226
176	0.163365	2.3754	0.0766601	0.645384	2.13715	0.222807	14.4098	4.82255	44.4948	10.6109	37.1207	6.07086	57.9812	8.38429	340.491	38.7272	1156.98	407.426	14264.5	1.16068	1.59922	52.1764	1	1	189.516	3.26081	66.0872	120.168	36.8522	0.725781	0.0334726	928.795
177	0.0156499	1.56262	0.0360345	0.733669	2.03876	0.0852914	6.48191	0.906225	3.61238	0.385919	0.603779	0.0599112	0.320025	0.0638214	152.628	75.8498	291.881	14.7323	12716.7	0.398674	0.213248	48.2553	1	1	16.906	2.34797	13.1246	1.43346	0.610508	1.86953	0.259865	918.67
178	0.00451062	1.29004	0.0484646	0.935361	2.53463	0.13764	9.14671	1.16658	5.50707	0.790649	1.70742	0.189886	1.38875	0.151315	178.403	80.6187	363.204	30.0644	12552.4	0.255376	0.052115	55.7565	1	1	24.999	2.27838	18.4926	4.22802	1.85571	4.90024	0.221965	937.533
179	0.076078	1.26351	0.141252	1.5658	3.38215	0.247086	14.414	4.06818	28.7981	4.60804	12.9991	1.72394	15.9704	2.04698	229.163	19.5808	1092.05	170.398	13359.2	0.488707	0.674753	48.3514	1	1	91.3046	3.04664	50.9094	37.3485	12.2589	0.724275	0.0179303	918.926
180	0.0597604	0.596223	0.0356681	0.776657	2.39305	0.253189	21.2573	6.43247	36.7374	4.04288	6.62746	0.694176	5.18953	0.822007	314.077	20.5073	1120.67	142.844	14262.3	0.354898	0.537912	51.765	1	1	85.9178	1.46831	67.0734	17.3761	11.8341	0.659769	0.0182992	927.762
181	0.00655815	0.849692	0.0285165	0.717234	3.22357	0.177562	16.4563	2.69485	11.7846	1.43673	2.50657	0.309265	2.2068	0.37757	160.35	39.2291	486.903	50.7405	13472.1	0.503481	0.322962	55.1317	1	1	42.7758	1.602	34.3368	6.83693	4.26775	1.55895	0.0805685	936.04
182	0.0733345	0.605242	0.0364053	0.402918	1.64038	0.131502	13.583	4.99036	39.8095	7.03203	19.0403	2.87026	24.439	3.67186	315.865	19.7203	1159.45	263.569	14490	0.44815	0.662402	47.3367	1	1	118.326	1.1179	60.1547	57.0535	51.0363	0.676553	0.0170084	916.205
183	0.00898175	1.59071	0.0482677	0.910485	2.67632	0.12668	7.31462	0.832619	3.41079	0.510301	1.46602	0.2847	3.21679	0.578337	153.006	18.246	261.44	19.9137	12171	0.237284	0.106515	46.9236	1	1	22.9756	2.55845	14.361	6.05615	2.36712	2.22771	0.0697904	915.084
184	0.0602567	1.19984	0.0325281	0.50836	1.97388	0.126607	12.8429	3.22599	22.0521	4.78553	19.4136	4.32396	57.2053	10.2624	213.479	28.6368	696.5	175.983	13362.2	1.08758	0.992606	52.0152	1	1	138.013	1.80099	40.2216	95.9908	53.2991	1.09568	0.0411153	928.391
185	0.09	13.45	0.14	0.27	1	0.73	6.9	2.37	29.71	9.33	36.87	9.07	88.23	16.84	16.2	54.1	294.3	324.4	36228	7.88	0.85	46.94	1	1	215	13.95	40.71	160.34	11.4939	9.27059	0.183826	915.129
186	0.02	6.77	0.06	0.62	1.71	0.7	5.66	2.37	25.42	7.26	27.86	5.01	42.12	8.35	21.1	68.4	431.4	245.8	34360	3.3	0.85	46.48	1	1	133.93	7.47	35.86	90.6	12.1285	3.88235	0.158554	913.872
187	0.17	4.69	0.05	0.07	0.37	0.39	3.61	1.18	10.87	2.77	9.54	1.72	13.41	2.46	13.2	31.8	290.2	94.9	34877	2.01	0.85	49.91	1	1	51.3	4.98	16.42	29.9	6.00402	2.36471	0.10958	923.019
188	0.02	5.46	0.05	0.71	0.9	0.76	8.49	3.11	33.64	10.59	39.42	7.17	59.37	9.89	22.5	55.3	589.9	340.4	35209	2.13	0.85	47.59	1	1	179.58	6.24	46.9	126.44	20.2628	2.50588	0.0937447	916.888
189	0.16	4.02	0.05	0.32	0.75	0.29	4.18	1.61	15.65	5	19.75	3.56	35.62	5.99	11.9	31.2	310.3	164.6	35438	1.92	0.85	44.08	1	1	96.95	4.55	22.48	69.92	15.367	2.25882	0.100548	907.151
190	0.02	10.37	0.26	1.73	1.89	0.87	8.06	2.42	22.45	6.91	26.55	5.72	53.18	11.01	29.2	42	652.1	1585.4	35004	17.84	0.85	45.91	1	1	151.44	12.38	35.69	103.37	8.34976	20.9882	0.0644073	912.301
191	0.15	6.37	0.05	0.62	0.13	0.66	7.24	1.84	18.36	4.82	16.52	3.27	34.47	5.84	25.6	42.3	628.1	706.1	33969	7.76	0.85	45.6	1	1	100.34	7.19	28.23	64.92	9.02921	9.12941	0.067346	911.44
192	0.02	10.46	0.04	0.23	1.14	1.44	8.49	3.28	26.13	7.85	28.35	6.25	59.18	11.11	28.5	59.4	557.9	318.1	45178	3.47	0.85	73.5	1	1	163.97	10.75	40.48	112.74	10.4874	4.08235	0.106471	975.318
193	0.14	12.02	0.06	0.4	1.44	0.27	3.53	2.53	29.03	11.89	40.49	9.57	66.53	15.23	14.1	38.5	281.9	244.6	44416	2.53	0.85	79.9	1	1	193.13	12.62	36.8	143.71	11.3875	2.97647	0.136573	987.204
194	0.2	3.76	0.05	0.62	1.45	0.35	4.25	2.07	19.81	7.16	22.54	4.53	34.44	7.26	32.2	42.4	562.4	151.9	46906	3.99	0.85	55.71	1	1	108.49	4.63	27.93	75.93	16.3996	4.69412	0.0753912	937.422
195	0.02	6.36	0.09	0.62	1.44	0.59	5.41	2.62	18.9	6.25	21.44	4.51	29.65	6.55	15.3	44.5	348.3	152.1	48396	2.4	0.85	65.98	1	1	104.45	7.09	28.96	68.4	9.64739	2.82353	0.127763	960.28
196	0.02	1.95	0.02	0.62	1.65	0.49	3.13	1.58	27.56	9.16	31.94	8.12	57.98	11.93	24.3	34.7	474	212.8	42343	2.28	0.85	47.91	1	1	156.15	2.61	34.41	119.13	45.6437	2.68235	0.0732068	917.747
197	0.46	5.44	0.05	0.62	1.44	1.33	7.73	2.73	23.81	9.19	28.15	7.24	50.24	11.16	24.2	51.7	467.9	183.7	40929	4.45	0.85	49.22	1	1	149.59	6.57	37.04	105.98	16.1309	5.23529	0.110494	921.219
198	1.1	9.39	0.18	2.26	1.52	0.58	10.06	2.46	26.09	9.43	29.98	7.5	65.97	17.22	31.4	57.1	430.1	205.5	41333	2.58	0.85	65.57	1	1	183.74	12.93	40.71	130.1	10.0619	3.03529	0.13276	959.422
199	0.19	4.62	0.28	1.31	1.79	0.71	5.76	2.2	21.77	8.07	27.43	6.17	43.31	9.94	42.4	73	443.1	473.4	43023	2.11	0.85	90.08	1	1	133.55	6.4	32.23	94.92	14.8313	2.48235	0.164748	1004.68
200	0.22	5.99	0.04	0.62	1.69	1.05	6.89	3.01	27.48	10.33	30.77	7.02	49.11	11.03	32.9	74.9	657.3	215.5	43215	3.19	0.85	68.46	1	1	155.25	6.87	40.12	108.26	15.7584	3.75294	0.113951	965.38
201	0.02	6.21	0.05	0.38	1.44	0.32	2.59	1.51	21.07	7.79	32.93	6.63	72.85	12.9	14.8	48.5	297.9	298.9	47982	2.08	0.85	53.93	1	1	166.69	6.66	26.93	133.1	19.985	2.44706	0.162806	933.132
202	0.029	6.84	0.029	0.13	0.38	0.13	5.24	2.2	30.5	13.5	67.2	15.8	158	32.2	177	104	434	436	11439	2.83	2.34	25.79	1	0.5	332.178	7.028	38.45	286.7	40.794	1.2094	0.239631	927.295
203	0.98	5.86	1.29	20.8	62	17.1	294	101	40.8	464	80.1	399	3794	41.89	773	1486	948	516.63	21425	44.5	7.32	49	1	1	5322.82	28.93	514.9	4778.99	165.191	6.07923	1.56751	920.641
204	0.71	128	0.45	7.6	19.7	5.54	75.6	26.4	332	124	569	114	1147	201	102	178	175	3776	11448	14.4	2.65	153	1	1	2751	136.76	459.24	2155	15.7575	5.43396	1.01714	1088.05
205	0.563	15	0.106	0.558	1.32	0.24	9.02	3.77	48.1	19.6	97.4	22.7	237	52.4	23.4	49.6	411	602	10789	11.8	4.59	39.2	1	0.5	507.777	16.227	62.45	429.1	26.4436	2.57081	0.120681	984.486
206	39	234	56.9	0.62	1.44	13.8	188	34.7	235	60.4	231	49.6	464	92.4	56.3	428	392	2521	12395	368	229	120	1	0.5	1700.86	330.52	472.94	897.4	2.71512	1.60699	1.09184	1167.95
207	8.57	54.7	3.24	22.1	14.4	1.73	47.6	14	147	52	217	47.6	460	79.4	225	466	605	1515	8419	12.8	10.3	53.6	1	0.5	1169.34	88.61	224.73	856	9.66031	1.24272	0.770248	1030.91
208	63.5	5.86	92.2	0.62	1.44	18.6	252	44.8	295	70.3	254	53.3	505	82.1	98.2	877	564	2748	9413	573	176	139	1	0.5	1738.72	162.18	611.84	964.7	5.94833	3.25568	1.55496	1196.11
209	10.5	5.86	12	76.2	39.5	3.13	50.1	11.4	106	36.3	162	40.6	428	64.7	41.1	273	358	1203	9570	273	133	46.9	1	0.5	1046.29	104.56	210.13	731.6	6.99694	2.05263	0.76257	1010.69
210	48.9	127	25	123	63.5	14.3	111	31.5	313	88.6	338	70.7	646	87.2	135	444	267	2276	7816	3.83	1.73	22.7	1	0.5	2087.7	323.9	533.3	1230.5	3.79901	2.21387	1.66292	910.882
211	0.14	50	0.07	0.91	2.3	0.61	16	7.3	99	44	225	53	528	107	21	79	130	1309	11900	7.8	1.9	25	1	0.5	1133.33	51.12	125.21	957	18.7207	4.10526	0.607692	923.252
212	0.03	77	0.08	1.5	3.7	0.91	20	7.4	98	42	210	48	494	104	34	198	215	1266	10600	5.9	1.2	28	1	0.5	1106.62	78.61	130.01	898	11.4235	4.91667	0.92093	938.111
213	0.106	0.29	0.09	0.37	0.601	0.103	0.84	0.165	1.91	0.56	1.45	0.345	3.08	0.403	27	3.82	144	15.3	8763	0.58	0.06	94.9	1	0.5	10.313	0.856	3.619	5.838	6.82009	9.66667	0.0265278	1125.16
214	0.118	8.93	0.09	2.25	3.56	0.9	22.2	7.29	88.4	33.8	144	33.3	310	50.2	41.3	107	200	983	9358	0.75	0.22	24	1	0.5	705.038	11.388	122.35	571.3	50.1668	3.40909	0.535	917.988
215	0.51	25.1	0.18	2.21	5.98	2.15	40.3	15.9	204	71.6	306	62.9	585	87	116	82.3	361	1934	5606	11.2	1.79	23.8	1	0.5	1408.83	28	268.33	1112.5	39.7321	6.25698	0.227978	916.915
216	0.408	28.3	0.103	1.39	4.61	1.16	30.4	11.7	157	61.2	265	54	491	72	104	133	356	1675	9079	10.9	1.88	93.7	1	0.5	1178.27	30.201	204.87	943.2	31.2308	5.79787	0.373596	1122.92
217	0.33	28.9	0.258	3.95	8.92	2.56	61.8	23.6	295	112	472	95	851	132	119	144	432	2937	8241	10.4	2.38	132	1	0.5	2087.32	33.438	391.88	1662	49.7039	4.36975	0.333333	1186.08
218	0.167	0.4	0.114	0.24	0.81	0.19	0.7	0.23	2.27	0.7	2.38	0.357	3.23	0.58	10.6	2.6	47.1	21.1	8677	1.37	0.072	53.4	1	0.5	12.368	0.921	4.2	7.247	7.86862	19.0278	0.0552017	1030.34
219	0.061	0.587	0.036	0.172	0.37	0.074	0.56	0.219	2.66	0.687	2.21	0.421	3.08	0.594	7.45	1.44	35.5	21.7	10087	1.18	0.081	88.3	1	0.5	11.731	0.856	3.883	6.992	8.16822	14.5679	0.0405634	1112.53
220	0.055	1.14	0.05	0.19	0.49	0.102	0.47	0.246	2.4	0.616	2.01	0.406	3.16	0.534	6.51	1.69	32	20.1	10624	0.6	0.047	41.7	1	0.5	11.869	1.435	3.708	6.726	4.68711	12.766	0.0528125	993.396
221	0.025	3.77	0.093	0.97	1.47	0.53	7.47	2.43	24.6	9.76	39.4	9.03	87.4	15.6	41.3	10.9	219	283	9824	1.59	0.33	45.8	1	0.5	202.548	4.858	36.5	161.19	33.1803	4.81818	0.0497717	1007.16
222	0.22	21.7	0.14	3.11	5.1	0.74	20.9	7.54	95.4	38.8	180	40.1	394	68.6	110	208	339	1129	9129	4.87	2.08	31.2	1	0.5	876.35	25.17	129.68	721.5	28.6651	2.34135	0.613569	952.648
223	0.137	2.66	0.081	0.51	0.39	0.37	2.26	0.61	4.78	1.26	4.27	0.6	5.5	0.79	43.9	17.4	270	40	10970	0.73	0.076	24.7	1	0.5	24.218	3.388	8.41	12.42	3.66588	9.60526	0.0644444	921.69
224	0.033	0.73	0.025	0.113	0.13	0.139	0.73	0.349	3.19	1	3.13	0.57	4.79	0.8	9.51	2.55	65.4	32.6	11471	1.96	0.091	116	1	0.5	15.729	0.901	4.538	10.29	11.4206	21.5385	0.0389908	1161.61
225	0.045	1.2	0.043	0.09	0.21	0.129	0.84	0.231	2.87	0.672	2.47	0.421	3.33	0.543	8.23	3.26	49.7	24.4	9460	0.41	0.07	23.4	1	0.5	13.094	1.378	4.28	7.436	5.39623	5.85714	0.0655936	914.747
226	0.09	3.13	0.113	0.28	0.68	0.42	2.73	0.97	9.65	2.67	11.1	2.04	20.8	4.23	21.9	5.25	140	89	10929	0.99	0.34	22.2	1	0.5	58.903	3.613	14.45	40.84	11.3036	2.91176	0.0375	908.064
